# Supplementary material
Source: PubMed Central journal article supplement (PMC6180209)
Supplement: NIHMS905624-supplement-2.pdf [file NIHMS905624-supplement-2.pdf]

**Lizard Rank Gene List**

| Gene               | Ranks | Symbol  |
|--------------------|-------|---------|
| ENSACAG00000028211 | 1     |         |
| ENSACAG00000028213 | 2     |         |
| ENSACAG00000021083 | 3     | TMSB4Y  |
| ENSACAG00000018368 | 4     |         |
| ENSACAG00000026102 | 5     |         |
| ENSACAG00000004591 | 6     |         |
| ENSACAG00000026138 | 7     |         |
| ENSACAG00000015643 | 8     |         |
| ENSACAG00000015238 | 9     | ACTG1   |
| ENSACAG00000015626 | 10    | NPM1    |
| ENSACAG00000002978 | 11    | RPS3A   |
| ENSACAG00000007960 | 12    | RPS24   |
| ENSACAG00000003169 | 13    | RPL21   |
| ENSACAG00000000615 | 14    | S100A10 |
| ENSACAG00000004065 | 15    | RPL35   |
| ENSACAG00000003060 | 16    |         |
| ENSACAG00000005290 | 17    | RPS26   |
| ENSACAG00000000061 | 18    |         |
| ENSACAG00000005022 | 19    |         |
| ENSACAG00000003507 | 20    | HMGA2   |
| ENSACAG00000009418 | 21    | RPL10A  |
| ENSACAG00000016566 | 22    | RPS9    |
| ENSACAG00000028228 | 23    | COX2    |
| ENSACAG00000005142 | 24    | VIM     |
| ENSACAG00000005058 | 25    | RPL11   |
| ENSACAG00000014396 | 26    | RPL7    |
| ENSACAG00000001200 | 27    |         |
| ENSACAG00000008192 | 28    |         |
| ENSACAG00000015187 | 29    | RPL26   |
| ENSACAG00000015711 | 30    | RPL18   |
| ENSACAG00000006531 | 31    | TPT1    |
| ENSACAG00000007317 | 32    | RPL9    |
| ENSACAG00000001000 | 33    | BASP1   |
| ENSACAG00000017634 | 34    |         |
| ENSACAG00000015697 | 35    | RPS8    |
| ENSACAG00000002915 | 36    | DYNLL1  |
| ENSACAG00000012225 | 37    |         |
| ENSACAG00000007175 | 38    | RAN     |
| ENSACAG00000016073 | 39    | RPL22L1 |
| ENSACAG00000005993 | 40    | RAB7A   |

|                    |            |
|--------------------|------------|
| ENSACAG00000007573 | 41 ATF4    |
| ENSACAG00000014988 | 42         |
| ENSACAG00000013718 | 43 RBM3    |
| ENSACAG00000004556 | 44 EEF1A1  |
| ENSACAG00000014849 | 45 RPL38   |
| ENSACAG00000008398 | 46 EIF4G2  |
| ENSACAG00000004884 | 47 HSPA8   |
| ENSACAG00000025960 | 48         |
| ENSACAG00000015273 | 49 CDK6    |
| ENSACAG00000014601 | 50 RPS4X   |
| ENSACAG00000015910 | 51 HMGA1   |
| ENSACAG00000023931 | 52         |
| ENSACAG00000001006 | 53 NCL     |
| ENSACAG00000006324 | 54 AKAP12  |
| ENSACAG00000020943 | 55         |
| ENSACAG00000014474 | 56 LPTM4A  |
| ENSACAG00000012025 | 57 CSF1    |
| ENSACAG00000010416 | 58 HNRNPDL |
| ENSACAG00000016470 | 59 PABPC3  |
| ENSACAG00000016001 | 60 CCND1   |
| ENSACAG00000016637 | 61 SRSF3   |
| ENSACAG00000013925 | 62         |
| ENSACAG00000008486 | 63         |
| ENSACAG00000012136 | 64 PTMA    |
| ENSACAG00000003302 | 65 RPS27A  |
| ENSACAG00000004681 | 66 SON     |
| ENSACAG00000011445 | 67 PKM     |
| ENSACAG00000013414 | 68 TUBA1C  |
| ENSACAG00000007876 | 69 MYL6    |
| ENSACAG00000003049 | 70 RPL14   |
| ENSACAG00000012890 | 71 HABP4   |
| ENSACAG00000006888 | 72 RPL29   |
| ENSACAG00000011604 | 73 RPS27   |
| ENSACAG00000009571 | 74         |
| ENSACAG00000013018 | 75         |
| ENSACAG00000015820 | 76 ANXA2   |
| ENSACAG00000017998 | 77         |
| ENSACAG00000010342 | 78 HNRNPD  |
| ENSACAG00000016047 | 79         |
| ENSACAG00000017933 | 80         |
| ENSACAG00000009505 | 81 HSPD1   |
| ENSACAG00000025748 | 82         |

|                     |               |
|---------------------|---------------|
| ENSACAG00000014176  | 83 RPS16      |
| ENSACAG00000001306  | 84 YWHAQ      |
| ENSACAG00000000197  | 85 RPLP1      |
| ENSACAG000000006502 | 86 GAPDH      |
| ENSACAG000000002194 | 87            |
| ENSACAG000000029107 | 88 FTL        |
| ENSACAG000000003051 | 89 RPS11      |
| ENSACAG000000004134 | 90 UQCRB      |
| ENSACAG000000004183 | 91            |
| ENSACAG000000016387 | 92 MYH9       |
| ENSACAG000000009864 | 93 ZNF207     |
| ENSACAG000000003624 | 94            |
| ENSACAG000000010792 | 95 MGP        |
| ENSACAG000000003756 | 96 RPLP0      |
| ENSACAG000000012029 | 97 RPL24      |
| ENSACAG000000012660 | 98 EIF1AY     |
| ENSACAG000000013211 | 99 CFBF       |
| ENSACAG000000010161 | 100           |
| ENSACAG000000008293 | 101 GPX1      |
| ENSACAG000000014791 | 102 HSP90AB1  |
| ENSACAG000000008297 | 103 RHOA      |
| ENSACAG000000004685 | 104           |
| ENSACAG000000012992 | 105 HNRNPA2B1 |
| ENSACAG000000005101 | 106           |
| ENSACAG000000007914 | 107 RPL31     |
| ENSACAG000000000895 | 108           |
| ENSACAG000000023361 | 109 TMA7      |
| ENSACAG000000000264 | 110 LAMP1     |
| ENSACAG000000004253 | 111 TCP1      |
| ENSACAG000000016779 | 112 SNRPD2    |
| ENSACAG000000005480 | 113 HMGB2     |
| ENSACAG000000012909 | 114 AMMECR1   |
| ENSACAG000000017201 | 115 TUBB      |
| ENSACAG000000002723 | 116 SKP1      |
| ENSACAG000000011136 | 117 RPS23     |
| ENSACAG000000002574 | 118 EIF3M     |
| ENSACAG000000014073 | 119 SNRPF     |
| ENSACAG000000012973 | 120 CBX3      |
| ENSACAG000000017141 | 121 CALR      |
| ENSACAG000000009759 | 122 RPL4      |
| ENSACAG000000016623 | 123 RBMS2     |
| ENSACAG000000015818 | 124 ETF1      |

|                    |                |
|--------------------|----------------|
| ENSACAG00000000473 | 125 CSTB       |
| ENSACAG00000002918 | 126            |
| ENSACAG00000006212 | 127            |
| ENSACAG00000003270 | 128 QKI        |
| ENSACAG00000007660 | 129 PFN2       |
| ENSACAG00000011543 | 130 FSTL1      |
| ENSACAG00000002681 | 131 RPL35A     |
| ENSACAG00000011074 | 132 EIF3H      |
| ENSACAG00000007994 | 133 TRMT2A     |
| ENSACAG00000011902 | 134 TPM3       |
| ENSACAG00000020966 | 135            |
| ENSACAG00000004921 | 136 ABRACL     |
| ENSACAG00000008281 | 137 SUMO3      |
| ENSACAG00000016190 | 138 HSP90B1    |
| ENSACAG00000008208 | 139 UBALD2     |
| ENSACAG00000014686 | 140            |
| ENSACAG00000011929 | 141 ANXA1      |
| ENSACAG00000028236 | 142 ND4L       |
| ENSACAG00000000985 | 143 CTGF       |
| ENSACAG00000000319 | 144 KPNA2      |
| ENSACAG00000008513 | 145            |
| ENSACAG00000029016 | 146 CD99       |
| ENSACAG00000006924 | 147 NAP1L1     |
| ENSACAG00000009352 | 148 TSPAN9     |
| ENSACAG00000028237 | 149 ND4        |
| ENSACAG00000017939 | 150 PTRF       |
| ENSACAG00000008763 | 151 CFL1       |
| ENSACAG00000004723 | 152 LMCD1      |
| ENSACAG00000017008 | 153 SSB        |
| ENSACAG00000000485 | 154 EIF5       |
| ENSACAG00000004265 | 155            |
| ENSACAG00000021682 | 156 RNaseP_nuc |
| ENSACAG00000005311 | 157 RPL23A     |
| ENSACAG00000008559 | 158 VDAC2      |
| ENSACAG00000016323 | 159            |
| ENSACAG00000000783 | 160            |
| ENSACAG00000007688 | 161 RPL3       |
| ENSACAG00000010479 | 162 RPS12      |
| ENSACAG00000010570 | 163 P4HB       |
| ENSACAG00000013180 | 164 CYR61      |
| ENSACAG00000013166 | 165            |
| ENSACAG00000016946 | 166 HNRNPAB    |

|                    |             |
|--------------------|-------------|
| ENSACAG00000002709 | 167 RPL22   |
| ENSACAG00000013524 | 168 RPL27   |
| ENSACAG00000007341 | 169 7-Sep   |
| ENSACAG00000009829 | 170 DDX21   |
| ENSACAG00000017279 | 171 RPL13A  |
| ENSACAG00000016222 | 172 CANX    |
| ENSACAG00000028244 | 173 CYTB    |
| ENSACAG00000012396 | 174 NUCKS1  |
| ENSACAG00000005743 | 175 GNG5    |
| ENSACAG00000014696 | 176 SH3BGRL |
| ENSACAG00000005809 | 177 UBL3    |
| ENSACAG00000005167 | 178 ERH     |
| ENSACAG00000001866 | 179         |
| ENSACAG00000016535 | 180 RBFOX2  |
| ENSACAG00000017813 | 181 STMN1   |
| ENSACAG00000015478 | 182         |
| ENSACAG00000015886 | 183         |
| ENSACAG00000009800 | 184 FLNA    |
| ENSACAG00000012369 | 185 RRAS2   |
| ENSACAG00000007627 | 186         |
| ENSACAG00000003927 | 187 DPM1    |
| ENSACAG00000001479 | 188 HNRNPK  |
| ENSACAG00000026823 | 189 RARRES1 |
| ENSACAG00000005143 | 190 SRSF5   |
| ENSACAG00000003710 | 191 CSRP1   |
| ENSACAG00000000151 | 192         |
| ENSACAG00000027977 | 193 EEF1G   |
| ENSACAG00000010488 | 194 CCT5    |
| ENSACAG00000011796 | 195 YWHAB   |
| ENSACAG00000003794 | 196 WDR83OS |
| ENSACAG00000004204 | 197 MDM2    |
| ENSACAG00000016040 | 198 ARPC3   |
| ENSACAG00000012581 | 199         |
| ENSACAG00000005994 | 200 EIF2S1  |
| ENSACAG00000013502 | 201 TRA2A   |
| ENSACAG00000026380 | 202         |
| ENSACAG00000004775 | 203 PHF5A   |
| ENSACAG00000009671 | 204 POMP    |
| ENSACAG00000003120 | 205 CSDE1   |
| ENSACAG00000000198 | 206 ROCK2   |
| ENSACAG00000008638 | 207 RASSF1  |
| ENSACAG00000016784 | 208 EIF3A   |

|                    |             |
|--------------------|-------------|
| ENSACAG00000009146 | 209 GNAI2   |
| ENSACAG00000010177 | 210 TAF13   |
| ENSACAG00000017432 | 211 MMD     |
| ENSACAG00000000767 | 212 DPY30   |
| ENSACAG00000007118 | 213 ATP8A1  |
| ENSACAG00000007071 | 214 KIF5B   |
| ENSACAG00000017111 | 215 COX5A   |
| ENSACAG00000012765 | 216 ANXA5   |
| ENSACAG00000025937 | 217 UBE2V1  |
| ENSACAG00000028534 | 218         |
| ENSACAG00000006027 | 219 PDPF    |
| ENSACAG00000000044 | 220 RPS13   |
| ENSACAG00000010831 | 221 FAU     |
| ENSACAG00000013621 | 222 CAPRIN1 |
| ENSACAG00000028225 | 223 COX1    |
| ENSACAG00000014541 | 224 PSMA3   |
| ENSACAG00000001423 | 225 EEF1B2  |
| ENSACAG00000005227 | 226         |
| ENSACAG00000023857 | 227 TCEB1   |
| ENSACAG00000004423 | 228         |
| ENSACAG00000009130 | 229 PTGES3  |
| ENSACAG00000010067 | 230 SNRPE   |
| ENSACAG00000013426 | 231 SLC6A6  |
| ENSACAG00000012926 | 232 IQSEC1  |
| ENSACAG00000002061 | 233 SRSF6   |
| ENSACAG00000009758 | 234 VPS26A  |
| ENSACAG00000003659 | 235 MSN     |
| ENSACAG00000026609 | 236         |
| ENSACAG00000002891 | 237 MTURN   |
| ENSACAG00000008158 | 238 DDX17   |
| ENSACAG00000015234 | 239 SYNCRIP |
| ENSACAG00000000758 | 240 FKBP2   |
| ENSACAG00000002169 | 241 RPS3    |
| ENSACAG00000000843 | 242         |
| ENSACAG00000022185 | 243 TUBA4B  |
| ENSACAG00000002289 | 244 PSMC3   |
| ENSACAG00000007730 | 245         |
| ENSACAG00000008213 | 246 USP14   |
| ENSACAG00000016364 | 247         |
| ENSACAG00000017344 | 248 PSMB2   |
| ENSACAG00000001089 | 249 ARPC2   |
| ENSACAG00000006333 | 250 NOP16   |

|                    |             |
|--------------------|-------------|
| ENSACAG00000016345 | 251 EMP3    |
| ENSACAG00000003233 | 252 DEK     |
| ENSACAG00000013274 | 253 HMGB3   |
| ENSACAG00000001408 | 254 SEPT2   |
| ENSACAG00000014933 | 255 NASP    |
| ENSACAG00000005576 | 256 PHF10   |
| ENSACAG00000000933 | 257         |
| ENSACAG00000002943 | 258 GTPBP4  |
| ENSACAG00000006693 | 259 ATOH8   |
| ENSACAG00000008196 | 260 CAPZA2  |
| ENSACAG00000015123 | 261 PRDX1   |
| ENSACAG00000010046 | 262 ACTN4   |
| ENSACAG00000004492 | 263 CCT2    |
| ENSACAG00000003386 | 264 ABCE1   |
| ENSACAG00000017030 | 265         |
| ENSACAG00000015986 | 266 CTNNA1  |
| ENSACAG00000016882 | 267 rps7    |
| ENSACAG00000006199 | 268 IGF2BP1 |
| ENSACAG00000016752 | 269 ATP5B   |
| ENSACAG00000013307 | 270 SFPQ    |
| ENSACAG00000007248 | 271 SEC61A1 |
| ENSACAG00000005736 | 272 ENAH    |
| ENSACAG00000000474 | 273 SMURF2  |
| ENSACAG00000013749 | 274         |
| ENSACAG00000011876 | 275         |
| ENSACAG00000001784 | 276 CCT8    |
| ENSACAG00000010970 | 277 GNAI3   |
| ENSACAG00000016414 | 278         |
| ENSACAG00000009482 | 279 HSPE1   |
| ENSACAG00000015376 | 280 ARL6IP5 |
| ENSACAG00000002543 | 281 SOD1    |
| ENSACAG00000017455 | 282 RPL19   |
| ENSACAG00000006179 | 283 COX5B   |
| ENSACAG00000003562 | 284 AHNAK   |
| ENSACAG00000012008 | 285 GNB2L1  |
| ENSACAG00000010490 | 286 ACKR3   |
| ENSACAG00000016934 | 287 BZW1    |
| ENSACAG00000013664 | 288 VGLL3   |
| ENSACAG00000013328 | 289         |
| ENSACAG00000006232 | 290 CD164   |
| ENSACAG00000016080 | 291 SQSTM1  |
| ENSACAG00000007682 | 292 EIF4A2  |

|                     |             |
|---------------------|-------------|
| ENSACAG00000001268  | 293 ATP5I   |
| ENSACAG00000005092  | 294 HMGB1   |
| ENSACAG00000001547  | 295 CCNL1   |
| ENSACAG00000003517  | 296 DNAJA1  |
| ENSACAG000000013092 | 297 HSPA4   |
| ENSACAG000000024255 | 298 NOP10   |
| ENSACAG000000028441 | 299         |
| ENSACAG000000015240 | 300 FKBP4   |
| ENSACAG000000017054 | 301 NFIX    |
| ENSACAG000000015935 | 302 SPRED1  |
| ENSACAG000000007429 | 303 SAT1    |
| ENSACAG000000012037 | 304 TOMM34  |
| ENSACAG000000009059 | 305 SEC61B  |
| ENSACAG000000011504 | 306 DBNL    |
| ENSACAG000000004757 | 307 TSN     |
| ENSACAG000000014256 | 308 PPP2R2B |
| ENSACAG000000016289 | 309 LPGAT1  |
| ENSACAG000000002126 | 310         |
| ENSACAG000000002339 | 311 AIDA    |
| ENSACAG000000003655 | 312 GSK3B   |
| ENSACAG000000002641 | 313 PSMB1   |
| ENSACAG000000014895 | 314 ATP5J   |
| ENSACAG000000004212 | 315 CUL3    |
| ENSACAG000000017653 | 316         |
| ENSACAG000000009243 | 317 PTP4A1  |
| ENSACAG000000016869 | 318 SERINC3 |
| ENSACAG000000007693 | 319         |
| ENSACAG000000009360 | 320 ADAM33  |
| ENSACAG000000009506 | 321 FOSL2   |
| ENSACAG000000008778 | 322         |
| ENSACAG000000027274 | 323         |
| ENSACAG000000017798 | 324 NFIB    |
| ENSACAG000000014769 | 325         |
| ENSACAG000000012234 | 326 HNRNPA3 |
| ENSACAG000000006310 | 327 FUBP1   |
| ENSACAG000000017064 | 328         |
| ENSACAG000000003125 | 329 RPL18A  |
| ENSACAG000000005453 | 330 HMGN1   |
| ENSACAG000000003957 | 331 LIN28B  |
| ENSACAG000000011654 | 332 RTN4    |
| ENSACAG000000001151 | 333 ZNF326  |
| ENSACAG000000025679 | 334         |



|                    |             |
|--------------------|-------------|
| ENSACAG00000023592 | 335         |
| ENSACAG00000012509 | 336 H2AFZ   |
| ENSACAG00000004408 | 337 CTNNB1  |
| ENSACAG00000003388 | 338         |
| ENSACAG00000013055 | 339 RPA3    |
| ENSACAG00000011248 | 340 SEPT9   |
| ENSACAG00000009185 | 341         |
| ENSACAG00000015210 | 342 ERGIC1  |
| ENSACAG00000003237 | 343 PPP2CB  |
| ENSACAG00000007878 | 344 SNRPG   |
| ENSACAG00000014919 | 345 ALDOA   |
| ENSACAG00000009957 | 346 CD63    |
| ENSACAG00000022662 | 347 TPM1    |
| ENSACAG00000008306 | 348 UCHL5   |
| ENSACAG00000002036 | 349 MCAM    |
| ENSACAG00000002871 | 350 LPP     |
| ENSACAG00000008753 | 351 ZNF706  |
| ENSACAG00000008694 | 352 YWHAZ   |
| ENSACAG00000028906 | 353 RAP1B   |
| ENSACAG00000013413 | 354         |
| ENSACAG00000016012 | 355 DENR    |
| ENSACAG00000023700 | 356         |
| ENSACAG00000017972 | 357 TCEA1   |
| ENSACAG00000006788 | 358 ITGB1   |
| ENSACAG00000007074 | 359 SMC4    |
| ENSACAG00000010561 | 360 EMP1    |
| ENSACAG00000015869 | 361 HSPA9   |
| ENSACAG00000007097 | 362 KPNB1   |
| ENSACAG00000003491 | 363         |
| ENSACAG00000009452 | 364 IPO7    |
| ENSACAG00000001709 | 365 SH3GLB1 |
| ENSACAG00000006082 | 366 SRSF7   |
| ENSACAG00000009145 | 367         |
| ENSACAG00000010583 | 368 WDR1    |
| ENSACAG00000011290 | 369 UBE2K   |
| ENSACAG00000008755 | 370 MCL1    |
| ENSACAG00000005272 | 371 NAA20   |
| ENSACAG00000004856 | 372 CNN3    |
| ENSACAG00000004372 | 373 CISD1   |
| ENSACAG00000017511 | 374         |
| ENSACAG00000009937 | 375 CD81    |
| ENSACAG00000016476 | 376 PPID    |

|                    |              |
|--------------------|--------------|
| ENSACAG00000002859 | 377 COX6A1   |
| ENSACAG00000013474 | 378          |
| ENSACAG00000004499 | 379 CALM1    |
| ENSACAG00000004336 | 380 ANP32B   |
| ENSACAG00000009121 | 381 TXNL1    |
| ENSACAG00000000820 | 382 MRPL36   |
| ENSACAG00000002316 | 383          |
| ENSACAG00000000617 | 384 S100A11  |
| ENSACAG00000000754 | 385          |
| ENSACAG00000013218 | 386 PSMB3    |
| ENSACAG00000004502 | 387 PLS3     |
| ENSACAG00000009605 | 388 AMOTL2   |
| ENSACAG00000014763 | 389 RPL32    |
| ENSACAG00000013151 | 390 DDAH1    |
| ENSACAG00000004401 | 391 ZCCHC24  |
| ENSACAG00000011602 | 392 ARL1     |
| ENSACAG00000005170 | 393 PFKFB3   |
| ENSACAG00000024324 | 394 NDUFB1   |
| ENSACAG00000005327 | 395 SRSF10   |
| ENSACAG00000001628 | 396          |
| ENSACAG00000007803 | 397 MAPKAPK2 |
| ENSACAG00000004829 | 398 MICAL2   |
| ENSACAG00000012600 | 399 ODC1     |
| ENSACAG00000010206 | 400 AMBP     |
| ENSACAG00000013113 | 401 RPL23    |
| ENSACAG00000008305 | 402 EIF5B    |
| ENSACAG00000012534 | 403 BID      |
| ENSACAG00000008216 | 404 KCNMA1   |
| ENSACAG00000011869 | 405 EIF4B    |
| ENSACAG00000005569 | 406 CCT4     |
| ENSACAG00000029194 | 407 PRRC2C   |
| ENSACAG00000015880 | 408 TSPO     |
| ENSACAG00000002099 | 409 CD9      |
| ENSACAG00000006770 | 410          |
| ENSACAG00000014587 | 411 TAF1D    |
| ENSACAG00000009041 | 412 EIF2S2   |
| ENSACAG00000004824 | 413 PARVA    |
| ENSACAG00000015980 | 414          |
| ENSACAG00000005956 | 415 AKAP17A  |
| ENSACAG00000004642 | 416 TEAD1    |
| ENSACAG00000007357 | 417 GNL3     |
| ENSACAG00000014204 | 418 SSBP3    |

|                     |               |
|---------------------|---------------|
| ENSACAG00000005081  | 419 NAF1      |
| ENSACAG00000001894  | 420           |
| ENSACAG000000013618 | 421 ELK3      |
| ENSACAG000000007180 | 422 ZYX       |
| ENSACAG00000001470  | 423 SAR1A     |
| ENSACAG000000009592 | 424 LSP1      |
| ENSACAG000000017175 | 425 FGF21     |
| ENSACAG000000013503 | 426 LSM3      |
| ENSACAG000000015943 | 427 ITGA6     |
| ENSACAG000000000642 | 428 MRPS18A   |
| ENSACAG000000003685 | 429 NDUFA1    |
| ENSACAG000000004202 | 430 ARL8A     |
| ENSACAG000000004655 | 431 NIFK      |
| ENSACAG000000021448 | 432 SNORND104 |
| ENSACAG000000005524 | 433 EIF4A1    |
| ENSACAG000000001016 | 434 COX7C     |
| ENSACAG000000016245 | 435           |
| ENSACAG000000003412 | 436 NDUFS5    |
| ENSACAG000000004511 | 437 HNRNPU    |
| ENSACAG000000008283 | 438 UBE2G2    |
| ENSACAG000000003872 | 439 PRKCE     |
| ENSACAG000000001991 | 440 CLTA      |
| ENSACAG000000006576 | 441 CAV1      |
| ENSACAG000000000623 | 442 CPT1B     |
| ENSACAG000000004004 | 443 LSM6      |
| ENSACAG000000017586 | 444 PMP22     |
| ENSACAG000000016239 | 445 RBM25     |
| ENSACAG000000023051 | 446 MANBAL    |
| ENSACAG000000005487 | 447           |
| ENSACAG000000026707 | 448           |
| ENSACAG000000017072 | 449 RPL13     |
| ENSACAG000000011052 | 450 RABGGTB   |
| ENSACAG000000000054 | 451 MYOD1     |
| ENSACAG000000012656 | 452 GNG10     |
| ENSACAG000000003777 | 453           |
| ENSACAG000000007288 | 454           |
| ENSACAG000000012931 | 455 RPS6KB1   |
| ENSACAG000000015632 | 456 ILF3      |
| ENSACAG000000013452 | 457 CDK17     |
| ENSACAG000000008629 | 458 BCAP31    |
| ENSACAG000000015909 | 459 STAU1     |
| ENSACAG000000012767 | 460 NDUFA12   |

|                    |              |
|--------------------|--------------|
| ENSACAG00000013982 | 461 GCA      |
| ENSACAG00000008127 | 462 TOMM22   |
| ENSACAG00000016359 | 463 DYNC1I2  |
| ENSACAG00000011328 | 464 SSR4     |
| ENSACAG00000003979 | 465          |
| ENSACAG00000005000 | 466 PPT1     |
| ENSACAG00000000017 | 467 RAB5A    |
| ENSACAG00000011081 | 468 AMD1     |
| ENSACAG00000004864 | 469 PRMT1    |
| ENSACAG00000005270 | 470 UBA1     |
| ENSACAG00000006006 | 471 SNX3     |
| ENSACAG00000000736 | 472 ABHD2    |
| ENSACAG00000006208 | 473 HN1      |
| ENSACAG00000012665 | 474 STK17B   |
| ENSACAG00000001152 | 475 THOC7    |
| ENSACAG00000004677 | 476          |
| ENSACAG00000005983 | 477 SMNDC1   |
| ENSACAG00000011701 | 478 PCBP4    |
| ENSACAG00000019859 | 479 5S_rRNA  |
| ENSACAG00000027271 | 480          |
| ENSACAG00000021101 | 481          |
| ENSACAG00000006958 | 482 TCEB2    |
| ENSACAG00000004201 | 483 TRIM8    |
| ENSACAG00000000868 | 484          |
| ENSACAG00000012650 | 485          |
| ENSACAG00000001509 | 486 TSPAN14  |
| ENSACAG00000009007 | 487 LTBP1    |
| ENSACAG00000011295 | 488          |
| ENSACAG00000005164 | 489 RUNX1    |
| ENSACAG00000013204 | 490 EBNA1BP2 |
| ENSACAG00000004479 | 491 RAB11A   |
| ENSACAG00000015004 | 492 RPS14    |
| ENSACAG00000008874 | 493          |
| ENSACAG00000016106 | 494 ATP2A2   |
| ENSACAG00000001904 | 495 TOP2A    |
| ENSACAG00000022364 | 496          |
| ENSACAG00000007661 | 497 CELF2    |
| ENSACAG00000012768 | 498          |
| ENSACAG00000010260 | 499          |
| ENSACAG00000005479 | 500 COX4I1   |
| ENSACAG00000001861 | 501 EEF1D    |
| ENSACAG00000002144 | 502 PRELP    |

|                    |             |
|--------------------|-------------|
| ENSACAG00000005542 | 503 SRSF1   |
| ENSACAG00000025054 | 504         |
| ENSACAG00000007563 | 505 MRPL38  |
| ENSACAG00000017239 | 506 AHSA1   |
| ENSACAG00000002458 | 507 MYEOV2  |
| ENSACAG00000015371 | 508 EIF3L   |
| ENSACAG00000002188 | 509         |
| ENSACAG00000005601 | 510 GARS    |
| ENSACAG00000029625 | 511 PLP2    |
| ENSACAG00000012573 | 512         |
| ENSACAG00000012502 | 513 PDLIM1  |
| ENSACAG00000011479 | 514         |
| ENSACAG00000011339 | 515 RPL15   |
| ENSACAG00000004885 | 516 BMPR2   |
| ENSACAG00000001128 | 517 CHMP1B  |
| ENSACAG00000006783 | 518 EFNA5   |
| ENSACAG00000016434 | 519 ZC3H13  |
| ENSACAG00000002976 | 520 DCTN6   |
| ENSACAG00000002564 | 521 ACTR3   |
| ENSACAG00000017234 | 522 IER3    |
| ENSACAG00000004071 | 523 LARP1   |
| ENSACAG00000010959 | 524 TAF12   |
| ENSACAG00000012949 | 525 RAC1    |
| ENSACAG00000013191 | 526 RPRD1B  |
| ENSACAG00000028133 | 527         |
| ENSACAG00000003918 | 528 FXR1    |
| ENSACAG00000013539 | 529 PFDN1   |
| ENSACAG00000009199 | 530 ERG     |
| ENSACAG00000006290 | 531 SCLT1   |
| ENSACAG00000008285 | 532 RAB14   |
| ENSACAG00000016330 | 533 ETS1    |
| ENSACAG00000002366 | 534 FOXP4   |
| ENSACAG00000017605 | 535 RALA    |
| ENSACAG00000012669 | 536 ACSL4   |
| ENSACAG00000001015 | 537         |
| ENSACAG00000015659 | 538 CSNK1A1 |
| ENSACAG00000009500 | 539 DBI     |
| ENSACAG00000027798 | 540         |
| ENSACAG00000000022 | 541 WNT5B   |
| ENSACAG00000021112 | 542         |
| ENSACAG00000004404 | 543 EIF1    |
| ENSACAG00000010365 | 544 HNRNPH3 |

|                    |              |
|--------------------|--------------|
| ENSACAG00000000600 | 545 FRMD4A   |
| ENSACAG00000003862 | 546 PSMD7    |
| ENSACAG00000015537 | 547 FST      |
| ENSACAG00000005305 | 548 GCLM     |
| ENSACAG00000016508 | 549 PSMD11   |
| ENSACAG00000013719 | 550 PSMC3IP  |
| ENSACAG00000016964 | 551 CLK1     |
| ENSACAG00000005717 | 552 GLS      |
| ENSACAG00000004988 | 553 SLK      |
| ENSACAG00000003566 | 554 ANLN     |
| ENSACAG00000008928 | 555 CALU     |
| ENSACAG00000025867 | 556          |
| ENSACAG00000015928 | 557 PACSIN2  |
| ENSACAG00000002183 | 558 UBE2D2   |
| ENSACAG00000007169 | 559          |
| ENSACAG00000021151 | 560          |
| ENSACAG00000003677 | 561 UQCRQ    |
| ENSACAG00000024492 | 562          |
| ENSACAG00000004649 | 563 HAS1     |
| ENSACAG00000003077 | 564 E2F3     |
| ENSACAG00000002549 | 565 RPS2     |
| ENSACAG00000001572 | 566 PLXNB2   |
| ENSACAG00000002120 | 567 EIF4G1   |
| ENSACAG00000013183 | 568 LDLRAD4  |
| ENSACAG00000009289 | 569 SNTB1    |
| ENSACAG00000027079 | 570          |
| ENSACAG00000008739 | 571 MBD2     |
| ENSACAG00000001556 | 572 HDLBP    |
| ENSACAG00000007490 | 573          |
| ENSACAG00000007544 | 574 PLXNA1   |
| ENSACAG00000014334 | 575 FAM168A  |
| ENSACAG00000010149 | 576 ANXA7    |
| ENSACAG00000008863 | 577 TCF4     |
| ENSACAG00000000804 | 578 DARS     |
| ENSACAG00000024775 | 579          |
| ENSACAG00000004328 | 580 SERPINE2 |
| ENSACAG00000005742 | 581          |
| ENSACAG00000001044 | 582          |
| ENSACAG00000009212 | 583 IARS     |
| ENSACAG00000005751 | 584 CSNK2B   |
| ENSACAG00000007599 | 585 PPP1R15B |
| ENSACAG00000006565 | 586 PHF20    |

|                     |              |
|---------------------|--------------|
| ENSACAG00000003174  | 587 PUM3     |
| ENSACAG00000001966  | 588 NDUFS3   |
| ENSACAG000000028219 | 589 ND2      |
| ENSACAG000000012504 | 590 SH3KBP1  |
| ENSACAG000000006698 | 591 MARS     |
| ENSACAG000000014707 | 592 CCDC59   |
| ENSACAG000000015163 | 593          |
| ENSACAG000000002421 | 594          |
| ENSACAG000000007211 | 595 TIMM10   |
| ENSACAG000000005508 | 596 ITGA3    |
| ENSACAG000000005477 | 597 MBP      |
| ENSACAG000000010526 | 598 ALYREF   |
| ENSACAG000000012800 | 599 SLC25A5  |
| ENSACAG000000001928 | 600 PPIA     |
| ENSACAG000000005974 | 601 DYNLL2   |
| ENSACAG000000016787 | 602          |
| ENSACAG000000000917 | 603 FAM107B  |
| ENSACAG000000005399 | 604 TUFM     |
| ENSACAG000000004031 | 605 BIN3     |
| ENSACAG000000005395 | 606 ACTN1    |
| ENSACAG000000005913 | 607 GNAQ     |
| ENSACAG000000005633 | 608 TPI1     |
| ENSACAG000000003473 | 609 WIF1     |
| ENSACAG000000010489 | 610 SDC1     |
| ENSACAG000000025279 | 611 C11orf31 |
| ENSACAG000000019162 | 612 SNORA35  |
| ENSACAG000000007931 | 613 ESYT1    |
| ENSACAG000000008018 | 614 PFKP     |
| ENSACAG000000008891 | 615 CHMP4B   |
| ENSACAG000000000136 | 616 STT3A    |
| ENSACAG000000010922 | 617 ARID5B   |
| ENSACAG000000023071 | 618 SNCAIP   |
| ENSACAG000000012255 | 619 11-Sep   |
| ENSACAG000000006103 | 620 OCIAD2   |
| ENSACAG000000000102 | 621 DYNC1H1  |
| ENSACAG000000014708 | 622 VAPB     |
| ENSACAG000000001589 | 623 CCDC6    |
| ENSACAG000000010022 | 624 NDUFB9   |
| ENSACAG000000000366 | 625 TNFAIP2  |
| ENSACAG000000005506 | 626 GID8     |
| ENSACAG000000006525 | 627 HPRT1    |
| ENSACAG000000010291 | 628 RPL37    |

|                    |              |
|--------------------|--------------|
| ENSACAG00000006203 | 629 ANXA3    |
| ENSACAG00000005830 | 630 USP7     |
| ENSACAG00000012240 | 631 DDX39B   |
| ENSACAG00000001660 | 632          |
| ENSACAG00000007323 | 633 NUDT21   |
| ENSACAG00000028241 | 634 ND5      |
| ENSACAG00000017773 | 635 SH3BGRL3 |
| ENSACAG00000017938 | 636 MOV10    |
| ENSACAG00000003903 | 637 MME      |
| ENSACAG00000012507 | 638 PPFIBP1  |
| ENSACAG00000015600 | 639 DKC1     |
| ENSACAG00000009712 | 640 FH       |
| ENSACAG00000002311 | 641 PSMD1    |
| ENSACAG00000013987 | 642 CWC15    |
| ENSACAG00000010419 | 643 ENOPH1   |
| ENSACAG00000015183 | 644 ATP6V0E1 |
| ENSACAG00000006692 | 645 NHP2     |
| ENSACAG00000016795 | 646 PGF      |
| ENSACAG00000008792 | 647          |
| ENSACAG00000000769 | 648 RASA1    |
| ENSACAG00000007037 | 649 IFRD1    |
| ENSACAG00000001777 | 650 NDUFB3   |
| ENSACAG00000016938 | 651 DNAJC7   |
| ENSACAG00000028232 | 652 COX3     |
| ENSACAG00000008859 | 653 CENPN    |
| ENSACAG00000024312 | 654 LYPLA1   |
| ENSACAG00000002858 | 655 LARP4B   |
| ENSACAG00000000062 | 656 TSG101   |
| ENSACAG00000015742 | 657 C6orf106 |
| ENSACAG00000003119 | 658 KLF13    |
| ENSACAG00000027496 | 659 KIF1B    |
| ENSACAG00000017684 | 660 TMEM258  |
| ENSACAG00000017011 | 661 BCLAF1   |
| ENSACAG00000003397 | 662 ADAM19   |
| ENSACAG00000015353 | 663 PNPLA2   |
| ENSACAG00000005089 | 664 RCAN1    |
| ENSACAG00000029432 | 665          |
| ENSACAG00000008040 | 666 ANP32E   |
| ENSACAG00000007525 | 667 MAP4K4   |
| ENSACAG00000028001 | 668          |
| ENSACAG00000002713 | 669 SAP18    |
| ENSACAG00000004698 | 670          |



|                    |               |
|--------------------|---------------|
| ENSACAG00000009509 | 671           |
| ENSACAG00000000210 | 672 PSMD12    |
| ENSACAG00000015352 | 673 PDGFRB    |
| ENSACAG00000010216 | 674 ANXA6     |
| ENSACAG00000000233 | 675 RAB11FIP1 |
| ENSACAG00000016308 | 676 EIF3D     |
| ENSACAG00000011882 | 677 ST3GAL1   |
| ENSACAG00000000412 | 678 DHX15     |
| ENSACAG00000013209 | 679 C9orf3    |
| ENSACAG00000006670 | 680 PSMC2     |
| ENSACAG00000013213 | 681 ZNHIT6    |
| ENSACAG00000005732 | 682 HOOK3     |
| ENSACAG00000022486 | 683 MGARP     |
| ENSACAG00000005258 | 684 STAM      |
| ENSACAG00000001400 | 685 PCBD2     |
| ENSACAG00000006537 | 686 MAP4      |
| ENSACAG00000011614 | 687           |
| ENSACAG00000006430 | 688 ROMO1     |
| ENSACAG00000014339 | 689           |
| ENSACAG00000011908 | 690 PSMD14    |
| ENSACAG00000017892 | 691 PDCD10    |
| ENSACAG00000005326 | 692 PNRC2     |
| ENSACAG00000015319 | 693           |
| ENSACAG00000017567 | 694 COX10     |
| ENSACAG00000025804 | 695           |
| ENSACAG00000003694 | 696 CHP1      |
| ENSACAG00000015637 | 697 FN1       |
| ENSACAG00000005545 | 698 DR1       |
| ENSACAG00000004926 | 699           |
| ENSACAG00000002045 | 700           |
| ENSACAG00000014301 | 701 TGFBR2    |
| ENSACAG00000025550 | 702 ASNA1     |
| ENSACAG00000004932 | 703 SH3PXD2A  |
| ENSACAG00000000214 | 704 CDC42BPB  |
| ENSACAG00000001083 | 705 RDX       |
| ENSACAG00000003154 | 706 XPOT      |
| ENSACAG00000006969 | 707 PPIB      |
| ENSACAG00000015739 | 708 LIN7C     |
| ENSACAG00000007264 | 709 DAG1      |
| ENSACAG00000013622 | 710 VRK1      |
| ENSACAG00000016085 | 711 CNOT3     |
| ENSACAG00000004596 | 712           |

|                    |              |
|--------------------|--------------|
| ENSACAG00000013971 | 713 FAM96A   |
| ENSACAG00000000112 | 714 RRM2     |
| ENSACAG00000010996 | 715 RPS5     |
| ENSACAG00000012102 | 716 MTPN     |
| ENSACAG00000017090 | 717 VASH1    |
| ENSACAG00000005452 | 718 MSI2     |
| ENSACAG00000003199 | 719 CAPN2    |
| ENSACAG00000017928 | 720          |
| ENSACAG00000011338 | 721 LARP1B   |
| ENSACAG00000000952 | 722 ITM2A    |
| ENSACAG00000000893 | 723          |
| ENSACAG00000003817 | 724 CAND1    |
| ENSACAG00000004330 | 725 DNAJC9   |
| ENSACAG00000013653 | 726          |
| ENSACAG00000014747 | 727 ERI3     |
| ENSACAG00000000042 | 728 C11orf58 |
| ENSACAG00000001005 | 729 POLR2G   |
| ENSACAG00000005208 | 730 RBX1     |
| ENSACAG00000014016 | 731 PPP1R12A |
| ENSACAG00000003779 | 732 SRFBP1   |
| ENSACAG00000027689 | 733          |
| ENSACAG00000014084 | 734 MSH6     |
| ENSACAG00000006618 | 735          |
| ENSACAG00000016311 | 736 FNDC3B   |
| ENSACAG00000009143 | 737 MRPL20   |
| ENSACAG00000011840 | 738 CDCA4    |
| ENSACAG00000012315 | 739 UBE2V2   |
| ENSACAG00000014547 | 740 CTBP2    |
| ENSACAG00000009019 | 741 WSB1     |
| ENSACAG00000005865 | 742 MDH1     |
| ENSACAG00000014123 | 743 PDIA4    |
| ENSACAG00000002808 | 744 AARS     |
| ENSACAG00000013910 | 745 EZH2     |
| ENSACAG00000009376 | 746          |
| ENSACAG00000006524 | 747 GRB2     |
| ENSACAG00000017412 | 748          |
| ENSACAG00000003331 | 749          |
| ENSACAG00000029049 | 750 DRAM2    |
| ENSACAG00000017852 | 751 CLIC4    |
| ENSACAG00000001337 | 752 C1D      |
| ENSACAG00000016997 | 753 GAS7     |
| ENSACAG00000007562 | 754 ACVR1    |

|                    |              |
|--------------------|--------------|
| ENSACAG00000016935 | 755 CTPS1    |
| ENSACAG00000003784 | 756 EXOSC5   |
| ENSACAG00000017055 | 757 NDUFB7   |
| ENSACAG00000006941 | 758 MYOF     |
| ENSACAG00000017848 | 759 SRRM1    |
| ENSACAG00000006776 | 760 FUS      |
| ENSACAG00000015118 | 761 HECTD1   |
| ENSACAG00000011291 | 762 TPX2     |
| ENSACAG00000004996 | 763 TIMM17A  |
| ENSACAG00000002092 | 764 NAA15    |
| ENSACAG00000001918 | 765 ACTR2    |
| ENSACAG00000017032 | 766 BAG3     |
| ENSACAG00000011605 | 767 CAPG     |
| ENSACAG00000014370 | 768 CHORDC1  |
| ENSACAG00000011424 | 769 BCL2L1   |
| ENSACAG00000009420 | 770 CTHRC1   |
| ENSACAG00000008346 | 771 EXT1     |
| ENSACAG00000000247 | 772 STIP1    |
| ENSACAG00000016265 | 773 DLGAP5   |
| ENSACAG00000012874 | 774 CDC5L    |
| ENSACAG00000012477 | 775 KIAA1328 |
| ENSACAG00000010410 | 776 ETFB     |
| ENSACAG00000014159 | 777 METAP2   |
| ENSACAG00000012479 | 778          |
| ENSACAG00000009787 | 779 MRPS27   |
| ENSACAG00000011584 | 780 TFG      |
| ENSACAG00000006341 | 781          |
| ENSACAG00000007204 | 782 TAX1BP1  |
| ENSACAG00000006720 | 783 AKT3     |
| ENSACAG00000017312 | 784 CLIC1    |
| ENSACAG00000005968 | 785 PDLIM7   |
| ENSACAG00000005114 | 786 ATP1B3   |
| ENSACAG00000008309 | 787 MET      |
| ENSACAG00000009576 | 788 SDHA     |
| ENSACAG00000009359 | 789 PPP1CB   |
| ENSACAG00000001354 | 790 DDX58    |
| ENSACAG00000015459 | 791 CD151    |
| ENSACAG00000001842 | 792 IP6K2    |
| ENSACAG00000009264 | 793 WDR43    |
| ENSACAG00000017650 | 794 PRPF4B   |
| ENSACAG00000017921 | 795 PSMC5    |
| ENSACAG00000012233 | 796 NAA10    |

|                    |             |
|--------------------|-------------|
| ENSACAG00000011566 | 797 TSPAN3  |
| ENSACAG00000008987 | 798 LGMN    |
| ENSACAG00000007078 | 799 CMPK2   |
| ENSACAG00000010518 | 800 PPP2R1A |
| ENSACAG00000008467 | 801 FRMD1   |
| ENSACAG00000003020 | 802 GDI2    |
| ENSACAG00000012699 | 803 IRF1    |
| ENSACAG00000005168 | 804 OGFR    |
| ENSACAG00000013232 | 805 SLC25A3 |
| ENSACAG00000017023 | 806 ANKRD11 |
| ENSACAG00000016628 | 807 FOXO1   |
| ENSACAG00000012912 | 808 TREX2   |
| ENSACAG00000008073 | 809 TXNDC12 |
| ENSACAG00000009426 | 810 FBLN5   |
| ENSACAG00000002501 | 811 XPO1    |
| ENSACAG00000014770 | 812 ITM2B   |
| ENSACAG00000010539 | 813 ARHGDI1 |
| ENSACAG00000008935 | 814 VCL     |
| ENSACAG00000010203 | 815 EIF3E   |
| ENSACAG00000006589 | 816 FAM162A |
| ENSACAG00000003740 | 817         |
| ENSACAG00000001488 | 818 TIPARP  |
| ENSACAG00000008478 | 819 JAK1    |
| ENSACAG00000004675 | 820 ETV6    |
| ENSACAG00000016592 | 821 GNPTAB  |
| ENSACAG00000007741 | 822         |
| ENSACAG00000003420 | 823 CCDC88A |
| ENSACAG00000015939 | 824 LRRFIP1 |
| ENSACAG00000006751 | 825 NAA50   |
| ENSACAG00000029041 | 826 EIF3K   |
| ENSACAG00000003382 | 827 PRDX2   |
| ENSACAG00000003607 | 828 RAD23B  |
| ENSACAG00000008424 | 829 MAFF    |
| ENSACAG00000017336 | 830         |
| ENSACAG00000001562 | 831 ANKRD40 |
| ENSACAG00000003923 | 832 CTTN    |
| ENSACAG00000003880 | 833 EIF3G   |
| ENSACAG00000001931 | 834 PSMB5   |
| ENSACAG00000001246 | 835         |
| ENSACAG00000006736 | 836 DDIT3   |
| ENSACAG00000015557 | 837 SMC3    |
| ENSACAG00000001922 | 838 MAPK6   |

|                    |              |
|--------------------|--------------|
| ENSACAG00000001916 | 839 ZC3H15   |
| ENSACAG00000004939 | 840 PLEKHB2  |
| ENSACAG00000001021 | 841 PSMD6    |
| ENSACAG00000003173 | 842 SNRPA1   |
| ENSACAG00000015053 | 843 IRF7     |
| ENSACAG00000009140 | 844 SURF4    |
| ENSACAG00000017316 | 845 PTBP3    |
| ENSACAG00000004244 | 846 MRPL18   |
| ENSACAG00000015794 | 847 SEC62    |
| ENSACAG00000007150 | 848 oaz2     |
| ENSACAG00000012681 | 849 RPS6KA3  |
| ENSACAG00000006624 | 850 CDC42BPA |
| ENSACAG00000016888 | 851 SFXN4    |
| ENSACAG00000025678 | 852          |
| ENSACAG00000011912 | 853 HTRA3    |
| ENSACAG00000008007 | 854 USP4     |
| ENSACAG00000016295 | 855 CYTH1    |
| ENSACAG00000010481 | 856 SEC31A   |
| ENSACAG00000011050 | 857 PHF20L1  |
| ENSACAG00000015235 | 858 SULF1    |
| ENSACAG00000015077 | 859 CACYBP   |
| ENSACAG00000000141 | 860 PTPN22   |
| ENSACAG00000009752 | 861 CCNYL1   |
| ENSACAG00000003959 | 862 SLC10A7  |
| ENSACAG00000013688 | 863          |
| ENSACAG00000016041 | 864 ARFGAP3  |
| ENSACAG00000013538 | 865 IGF2BP3  |
| ENSACAG00000000074 | 866 NAP1L4   |
| ENSACAG00000023502 | 867          |
| ENSACAG00000027924 | 868          |
| ENSACAG00000009061 | 869 CAMK2G   |
| ENSACAG00000017602 | 870 VPS4B    |
| ENSACAG00000005666 | 871 IWS1     |
| ENSACAG00000000182 | 872 RCOR1    |
| ENSACAG00000006231 | 873 CHD4     |
| ENSACAG00000009551 | 874 RBMX     |
| ENSACAG00000001880 | 875          |
| ENSACAG00000011907 | 876 PCNP     |
| ENSACAG00000017099 | 877 LIMA1    |
| ENSACAG00000011963 | 878 UCHL1    |
| ENSACAG00000013605 | 879 ANKRD13C |
| ENSACAG00000003347 | 880 DAP3     |

|                    |              |
|--------------------|--------------|
| ENSACAG00000001974 | 881 BACH1    |
| ENSACAG00000011636 | 882 HSPA4L   |
| ENSACAG00000013052 | 883 SETD3    |
| ENSACAG00000016197 | 884 RAE1     |
| ENSACAG00000012214 | 885 CCNI     |
| ENSACAG00000015685 | 886          |
| ENSACAG00000011540 | 887 FGFRL1   |
| ENSACAG00000000650 | 888          |
| ENSACAG00000012499 | 889          |
| ENSACAG00000017186 | 890 UBTF     |
| ENSACAG00000012828 | 891 C9orf85  |
| ENSACAG00000003455 | 892          |
| ENSACAG00000002023 | 893 MTERF4   |
| ENSACAG00000017343 | 894 WDR45B   |
| ENSACAG00000001457 | 895 MDH2     |
| ENSACAG00000001328 | 896 ITGAV    |
| ENSACAG00000009529 | 897 TMEM41B  |
| ENSACAG00000005941 | 898          |
| ENSACAG00000022366 | 899          |
| ENSACAG00000012852 | 900 UBE2R2   |
| ENSACAG00000006912 | 901 SRRM2    |
| ENSACAG00000014732 | 902          |
| ENSACAG00000028603 | 903 CHCHD3   |
| ENSACAG00000015101 | 904 PTEN     |
| ENSACAG00000003286 | 905 TTC1     |
| ENSACAG00000026224 | 906 H3F3A    |
| ENSACAG00000014032 | 907 TOMM7    |
| ENSACAG00000009417 | 908          |
| ENSACAG00000017133 | 909 LARP4    |
| ENSACAG00000017924 | 910 CASK     |
| ENSACAG00000010694 | 911 TRIM28   |
| ENSACAG00000006056 | 912 C16orf72 |
| ENSACAG00000015211 | 913 FAM19A1  |
| ENSACAG00000003807 | 914 STX10    |
| ENSACAG00000012653 | 915 ZFAND5   |
| ENSACAG00000014595 | 916          |
| ENSACAG00000010935 | 917          |
| ENSACAG00000017466 | 918 M6PR     |
| ENSACAG00000004798 | 919 SRF      |
| ENSACAG00000005405 | 920 SDCBP    |
| ENSACAG00000009404 | 921 SMC1A    |
| ENSACAG00000012404 | 922 PPRC1    |

|                    |              |
|--------------------|--------------|
| ENSACAG00000011125 | 923 FILIP1L  |
| ENSACAG00000012036 | 924 UBE3A    |
| ENSACAG00000002093 | 925 PSPC1    |
| ENSACAG00000011439 | 926 MESDC2   |
| ENSACAG00000008639 | 927 YES1     |
| ENSACAG00000012698 | 928 ATP5A1   |
| ENSACAG00000013402 | 929          |
| ENSACAG00000006507 | 930 PFDN4    |
| ENSACAG00000008585 | 931 MGMT     |
| ENSACAG00000012937 | 932 IK       |
| ENSACAG00000015436 | 933 DNM2     |
| ENSACAG00000026140 | 934 TCOF1    |
| ENSACAG00000002949 | 935          |
| ENSACAG00000002653 | 936 PPP2CA   |
| ENSACAG00000003389 | 937 RBBP4    |
| ENSACAG00000001253 | 938 RBM34    |
| ENSACAG00000014617 | 939 NAV3     |
| ENSACAG00000006706 | 940 PAFAH1B1 |
| ENSACAG00000008821 | 941 TMBIM6   |
| ENSACAG00000007482 | 942          |
| ENSACAG00000007571 | 943 RPS19BP1 |
| ENSACAG00000015087 | 944 CDH11    |
| ENSACAG00000009860 | 945 TMEM9B   |
| ENSACAG00000005972 | 946 PPP2R2A  |
| ENSACAG00000015564 | 947 MPC1     |
| ENSACAG00000009927 | 948 CCAR1    |
| ENSACAG00000003263 | 949 LOXL4    |
| ENSACAG00000008010 | 950 PVRL3    |
| ENSACAG00000000652 | 951 MARK3    |
| ENSACAG00000002565 | 952 SLC16A3  |
| ENSACAG00000007022 | 953 CEP55    |
| ENSACAG00000009018 | 954 CRELD2   |
| ENSACAG00000003909 | 955 BCAS4    |
| ENSACAG00000016971 | 956 RACGAP1  |
| ENSACAG00000010811 | 957 ARHGDIB  |
| ENSACAG00000000403 | 958 PDGFA    |
| ENSACAG00000020174 | 959 SNORD74  |
| ENSACAG00000003370 | 960          |
| ENSACAG00000004215 | 961 ATP5C1   |
| ENSACAG00000005057 | 962 TMEM30A  |
| ENSACAG00000005937 | 963          |
| ENSACAG00000012645 | 964 QARS     |

|                    |             |
|--------------------|-------------|
| ENSACAG00000028231 | 965 ATP6    |
| ENSACAG00000003736 | 966 VAPA    |
| ENSACAG00000006500 | 967         |
| ENSACAG00000000682 | 968 PUM1    |
| ENSACAG00000013668 | 969 NR3C1   |
| ENSACAG00000012586 | 970 CAST    |
| ENSACAG00000001831 | 971 GPM6B   |
| ENSACAG00000000046 | 972 NUCB2   |
| ENSACAG00000020961 | 973 POLR2K  |
| ENSACAG00000015226 | 974         |
| ENSACAG00000017494 | 975 BUB3    |
| ENSACAG00000001452 | 976 TPR     |
| ENSACAG00000006677 | 977 MRPL51  |
| ENSACAG00000010173 | 978 DAB2    |
| ENSACAG00000001424 | 979 HINT1   |
| ENSACAG00000012456 | 980 SDC4    |
| ENSACAG00000001213 | 981 EPRS    |
| ENSACAG00000010725 | 982 TIPRL   |
| ENSACAG00000013788 | 983         |
| ENSACAG00000002890 | 984 ARF4    |
| ENSACAG00000004537 | 985         |
| ENSACAG00000004769 | 986 FARSB   |
| ENSACAG00000005882 | 987 IMP4    |
| ENSACAG00000007120 | 988 SOGA1   |
| ENSACAG00000005018 | 989 SNX9    |
| ENSACAG00000026804 | 990 BANF1   |
| ENSACAG00000006356 | 991 BMP2K   |
| ENSACAG00000009355 | 992         |
| ENSACAG00000028664 | 993         |
| ENSACAG00000002381 | 994 SRP72   |
| ENSACAG00000012290 | 995 FGD1    |
| ENSACAG00000007619 | 996         |
| ENSACAG00000001881 | 997 GNA13   |
| ENSACAG00000012101 | 998 PDE6D   |
| ENSACAG00000012271 | 999         |
| ENSACAG00000004925 | 1000 HSPH1  |
| ENSACAG00000003916 | 1001 NDUFA6 |
| ENSACAG00000005266 | 1002 MRPL27 |
| ENSACAG00000008704 | 1003 NDUFS8 |
| ENSACAG00000000442 | 1004 LECT1  |
| ENSACAG00000006925 | 1005 ARCN1  |
| ENSACAG00000008710 | 1006 AHRR   |



|                    |              |
|--------------------|--------------|
| ENSACAG00000007617 | 1007 LMAN1   |
| ENSACAG00000003589 | 1008 CFAP36  |
| ENSACAG00000008507 | 1009 KIF2A   |
| ENSACAG00000001199 | 1010         |
| ENSACAG00000015169 | 1011 PPM1A   |
| ENSACAG00000015753 | 1012 POLR1D  |
| ENSACAG00000010675 | 1013 TNIP1   |
| ENSACAG00000006923 | 1014 ARF1    |
| ENSACAG00000027720 | 1015 RNF214  |
| ENSACAG00000029549 | 1016 CENPQ   |
| ENSACAG00000010630 | 1017         |
| ENSACAG00000010743 | 1018 MRPL12  |
| ENSACAG00000013302 | 1019 MPP6    |
| ENSACAG00000004247 | 1020 CRIPT   |
| ENSACAG00000006742 | 1021 ARIH1   |
| ENSACAG00000000216 | 1022 TJP1    |
| ENSACAG00000028815 | 1023         |
| ENSACAG00000001848 | 1024 NFKBIA  |
| ENSACAG00000007011 | 1025 C7orf60 |
| ENSACAG00000010513 | 1026 AP2M1   |
| ENSACAG00000008379 | 1027 EIF2AK2 |
| ENSACAG00000011270 | 1028 RPF2    |
| ENSACAG00000029393 | 1029 SNX4    |
| ENSACAG00000008524 | 1030 MAP3K7  |
| ENSACAG00000005535 | 1031 ASB8    |
| ENSACAG00000005247 | 1032         |
| ENSACAG00000001436 | 1033 TMEM63B |
| ENSACAG00000013511 | 1034 IFI35   |
| ENSACAG00000016688 | 1035         |
| ENSACAG00000012042 | 1036 KHDRBS3 |
| ENSACAG00000014278 | 1037 KTN1    |
| ENSACAG00000001072 | 1038 MCM6    |
| ENSACAG00000001658 | 1039         |
| ENSACAG00000010909 | 1040 RAD21   |
| ENSACAG00000027068 | 1041         |
| ENSACAG00000005840 | 1042 PBX1    |
| ENSACAG00000003317 | 1043 SNRPD3  |
| ENSACAG00000025743 | 1044         |
| ENSACAG00000028328 | 1045 ZFAND3  |
| ENSACAG00000000612 | 1046 EIF4H   |
| ENSACAG00000003874 | 1047 AXL     |
| ENSACAG00000008243 | 1048 SGMS2   |

|                    |              |
|--------------------|--------------|
| ENSACAG00000012400 | 1049 DCUN1D5 |
| ENSACAG00000013836 | 1050 KPNA3   |
| ENSACAG00000013171 | 1051 CCT3    |
| ENSACAG00000005015 | 1052 RPS21   |
| ENSACAG00000020672 | 1053 snoZ40  |
| ENSACAG00000016158 | 1054 PSMA7   |
| ENSACAG00000001743 | 1055 UBE2L3  |
| ENSACAG00000003768 | 1056 PREP    |
| ENSACAG00000003751 | 1057 PGAP3   |
| ENSACAG00000005070 | 1058 TRAM2   |
| ENSACAG00000014816 | 1059 RNH1    |
| ENSACAG00000005190 | 1060 SH3BP2  |
| ENSACAG00000015309 | 1061 DLD     |
| ENSACAG00000008477 | 1062 SMAP1   |
| ENSACAG00000012010 | 1063 PRKAR2A |
| ENSACAG00000012980 | 1064         |
| ENSACAG00000013847 | 1065 DES     |
| ENSACAG00000016966 | 1066 MAPK14  |
| ENSACAG00000007899 | 1067 FMR1    |
| ENSACAG00000000511 | 1068 CAPNS1  |
| ENSACAG00000008349 | 1069         |
| ENSACAG00000021049 | 1070         |
| ENSACAG00000009422 | 1071 MPC2    |
| ENSACAG00000003755 | 1072 RTF1    |
| ENSACAG00000007192 | 1073 NPTN    |
| ENSACAG00000015556 | 1074 PLK3    |
| ENSACAG00000013076 | 1075 CYCS    |
| ENSACAG00000017457 | 1076 MAP2K4  |
| ENSACAG00000021095 | 1077 DNAJC21 |
| ENSACAG00000005519 | 1078 VEZF1   |
| ENSACAG00000012174 | 1079 HDAC2   |
| ENSACAG00000002114 | 1080 CELF1   |
| ENSACAG00000003576 | 1081 TNPO2   |
| ENSACAG00000008011 | 1082 LETM1   |
| ENSACAG00000012805 | 1083 VMP1    |
| ENSACAG00000016581 | 1084 CKS2    |
| ENSACAG00000016194 | 1085 HAT1    |
| ENSACAG00000023372 | 1086         |
| ENSACAG00000002652 | 1087 PLCB1   |
| ENSACAG00000006092 | 1088 ATP5H   |
| ENSACAG00000006656 | 1089 RAB23   |
| ENSACAG00000010495 | 1090 COPS8   |

|                    |                |
|--------------------|----------------|
| ENSACAG00000015485 | 1091 PPM1B     |
| ENSACAG00000015382 | 1092 TMED2     |
| ENSACAG00000013299 | 1093 TMCO1     |
| ENSACAG00000011682 | 1094 AP2S1     |
| ENSACAG00000004383 | 1095 CDV3      |
| ENSACAG00000008501 | 1096 ELOVL5    |
| ENSACAG00000002726 | 1097 ARHGAP5   |
| ENSACAG00000000749 | 1098 PTP4A3    |
| ENSACAG00000016304 | 1099           |
| ENSACAG00000007701 | 1100           |
| ENSACAG00000000477 | 1101 NOVA1     |
| ENSACAG00000014545 | 1102 NOLC1     |
| ENSACAG00000014920 | 1103 HRAS      |
| ENSACAG00000005970 | 1104 PLEK2     |
| ENSACAG00000013659 | 1105 CHCHD4    |
| ENSACAG00000003021 | 1106           |
| ENSACAG00000003426 | 1107 NDUFV2    |
| ENSACAG00000011593 | 1108 RPN2      |
| ENSACAG00000011753 | 1109 VBP1      |
| ENSACAG00000009716 | 1110 MYL9      |
| ENSACAG00000005133 | 1111 LAMC1     |
| ENSACAG00000004293 | 1112 ZRANB2    |
| ENSACAG00000009714 | 1113           |
| ENSACAG00000001956 | 1114 CCSER2    |
| ENSACAG00000021103 | 1115 HIST2H4B  |
| ENSACAG00000001034 | 1116           |
| ENSACAG00000015894 | 1117 PNN       |
| ENSACAG00000001257 | 1118 FXN       |
| ENSACAG00000008492 | 1119 NOC2L     |
| ENSACAG00000029093 | 1120           |
| ENSACAG00000011819 | 1121           |
| ENSACAG00000008940 | 1122 FMNL3     |
| ENSACAG00000008758 | 1123 IFRD2     |
| ENSACAG00000019712 | 1124 RNase_MRP |
| ENSACAG00000020986 | 1125 MKI67     |
| ENSACAG00000003766 | 1126 ATP6V1G1  |
| ENSACAG00000023616 | 1127           |
| ENSACAG00000002407 | 1128 CCDC91    |
| ENSACAG00000008303 | 1129           |
| ENSACAG00000017937 | 1130           |
| ENSACAG00000006810 | 1131 KIF20A    |
| ENSACAG00000009662 | 1132 RYK       |

|                    |               |
|--------------------|---------------|
| ENSACAG00000011389 | 1133 TOMM70A  |
| ENSACAG00000004603 | 1134 DIAPH3   |
| ENSACAG00000014001 | 1135 PAWR     |
| ENSACAG00000006546 | 1136 MNAT1    |
| ENSACAG00000003504 | 1137 MSRB3    |
| ENSACAG00000014437 | 1138 COX7A2L  |
| ENSACAG00000017346 | 1139 KANSL1   |
| ENSACAG00000006545 | 1140          |
| ENSACAG00000016909 | 1141 RIMS4    |
| ENSACAG00000003579 | 1142 RRP7A    |
| ENSACAG00000004851 | 1143 PTK7     |
| ENSACAG00000002417 | 1144          |
| ENSACAG00000015721 | 1145 SNRPC    |
| ENSACAG00000002003 | 1146 SLC16A6  |
| ENSACAG00000011684 | 1147 STMN3    |
| ENSACAG00000007350 | 1148          |
| ENSACAG00000004697 | 1149 ITSN1    |
| ENSACAG00000012791 | 1150 FOXN3    |
| ENSACAG00000009215 | 1151 MAP7D3   |
| ENSACAG00000007253 | 1152 ARHGAP12 |
| ENSACAG00000007173 | 1153 ARMC8    |
| ENSACAG00000011142 | 1154 ACADM    |
| ENSACAG00000011972 | 1155 SPTBN1   |
| ENSACAG00000002152 | 1156          |
| ENSACAG00000015246 | 1157 DUSP1    |
| ENSACAG00000012729 | 1158          |
| ENSACAG00000008917 | 1159 ERP44    |
| ENSACAG00000002970 | 1160 MTR      |
| ENSACAG00000028682 | 1161 PRPF38B  |
| ENSACAG00000017232 | 1162 PRKRA    |
| ENSACAG00000006674 | 1163          |
| ENSACAG00000001727 | 1164 PSMD2    |
| ENSACAG00000003520 | 1165 RALBP1   |
| ENSACAG00000012081 | 1166 TMEM33   |
| ENSACAG00000005960 | 1167 UGP2     |
| ENSACAG00000014556 | 1168 DPYSL3   |
| ENSACAG00000011936 | 1169 NPM3     |
| ENSACAG00000002496 | 1170 ANKRD28  |
| ENSACAG00000003027 | 1171 CDKAL1   |
| ENSACAG00000004927 | 1172 FAM168B  |
| ENSACAG00000017598 | 1173          |
| ENSACAG00000000984 | 1174 NAA16    |

|                    |                |
|--------------------|----------------|
| ENSACAG00000007432 | 1175 RAB21     |
| ENSACAG00000015350 | 1176 EMC7      |
| ENSACAG00000005207 | 1177 ADD1      |
| ENSACAG00000007551 | 1178 NOC3L     |
| ENSACAG00000003476 | 1179 NIP7      |
| ENSACAG00000027453 | 1180           |
| ENSACAG00000000027 | 1181 PLEKHJ1   |
| ENSACAG00000014813 | 1182 SYNPO     |
| ENSACAG00000006639 | 1183 WDR82     |
| ENSACAG00000016084 | 1184 EIF5A2    |
| ENSACAG00000003515 | 1185 POLDIP3   |
| ENSACAG00000007880 | 1186 ZFR       |
| ENSACAG00000010269 | 1187 SARS      |
| ENSACAG00000004506 | 1188 EIF3I     |
| ENSACAG00000004938 | 1189 RARS      |
| ENSACAG00000010605 | 1190 BAG5      |
| ENSACAG00000005984 | 1191 SNRNP27   |
| ENSACAG00000009599 | 1192 TNPO1     |
| ENSACAG00000009679 | 1193 FAIM      |
| ENSACAG00000005284 | 1194 CRNKL1    |
| ENSACAG00000009043 | 1195 MXRA8     |
| ENSACAG00000005042 | 1196           |
| ENSACAG00000005761 | 1197           |
| ENSACAG00000000180 | 1198 ANKRD9    |
| ENSACAG00000029651 | 1199 CKAP5     |
| ENSACAG00000005440 | 1200 TRIP12    |
| ENSACAG00000024314 | 1201           |
| ENSACAG00000016664 | 1202           |
| ENSACAG00000006930 | 1203 FAT1      |
| ENSACAG00000015888 | 1204           |
| ENSACAG00000027516 | 1205           |
| ENSACAG00000004299 | 1206 ADSS      |
| ENSACAG00000011711 | 1207 ARHGAP24  |
| ENSACAG00000013239 | 1208 FAM13A    |
| ENSACAG00000001698 | 1209 TOB1      |
| ENSACAG00000028480 | 1210 TNFRSF12A |
| ENSACAG00000009207 | 1211 AZIN1     |
| ENSACAG00000006106 | 1212 OCIAD1    |
| ENSACAG00000016762 | 1213 VPS36     |
| ENSACAG00000005173 | 1214 DDX10     |
| ENSACAG00000006036 | 1215 ASPH      |
| ENSACAG00000002470 | 1216           |

|                    |              |
|--------------------|--------------|
| ENSACAG00000026549 | 1217         |
| ENSACAG00000006775 | 1218 ASAH1   |
| ENSACAG00000004779 | 1219 CNOT2   |
| ENSACAG00000029015 | 1220         |
| ENSACAG00000014017 | 1221 IFIH1   |
| ENSACAG00000003453 | 1222 AK2     |
| ENSACAG00000010082 | 1223 BIN1    |
| ENSACAG00000014280 | 1224 BRD7    |
| ENSACAG00000009967 | 1225 LRRFIP2 |
| ENSACAG00000004796 | 1226 PDCD11  |
| ENSACAG00000004030 | 1227 CLPTM1  |
| ENSACAG00000007217 | 1228         |
| ENSACAG00000016015 | 1229 ERBB2IP |
| ENSACAG00000013565 | 1230 UBP1    |
| ENSACAG00000000888 | 1231 MAK16   |
| ENSACAG00000003016 | 1232 TXNDC5  |
| ENSACAG00000029278 | 1233 LRPPRC  |
| ENSACAG00000009255 | 1234 MRPL13  |
| ENSACAG00000012615 | 1235 MORC3   |
| ENSACAG00000005839 | 1236 RPN1    |
| ENSACAG00000001226 | 1237         |
| ENSACAG00000002060 | 1238 SLC38A2 |
| ENSACAG00000014398 | 1239 FAM53B  |
| ENSACAG00000017270 | 1240 BRD4    |
| ENSACAG00000028392 | 1241 THBS1   |
| ENSACAG00000018742 | 1242 SNORD81 |
| ENSACAG00000011036 | 1243 DDX1    |
| ENSACAG00000003877 | 1244 SPCS2   |
| ENSACAG00000013640 | 1245         |
| ENSACAG00000007220 | 1246 SFSWAP  |
| ENSACAG00000010214 | 1247 JMJD1C  |
| ENSACAG00000010026 | 1248 MTSS1   |
| ENSACAG00000010782 | 1249 PPP3CC  |
| ENSACAG00000023090 | 1250         |
| ENSACAG00000015763 | 1251 B4GALT5 |
| ENSACAG00000008832 | 1252 TMEM251 |
| ENSACAG00000009882 | 1253 OXR1    |
| ENSACAG00000012876 | 1254 UBAP2   |
| ENSACAG00000011519 | 1255 HELZ2   |
| ENSACAG00000012020 | 1256 NDUFAB1 |
| ENSACAG00000012954 | 1257 TTLL4   |
| ENSACAG00000016895 | 1258 METTL16 |

|                    |              |
|--------------------|--------------|
| ENSACAG00000005677 | 1259 PRELID1 |
| ENSACAG00000013676 | 1260 RAB10   |
| ENSACAG00000017552 | 1261         |
| ENSACAG00000000178 | 1262 PLPP3   |
| ENSACAG00000001524 | 1263 CRIM1   |
| ENSACAG00000010517 | 1264 ABCF1   |
| ENSACAG00000001260 | 1265 HSF2    |
| ENSACAG00000010151 | 1266 ATP2B4  |
| ENSACAG00000010080 | 1267 ASCC3   |
| ENSACAG00000010421 | 1268 PNISR   |
| ENSACAG00000003341 | 1269 COPB2   |
| ENSACAG00000011944 | 1270 MGEA5   |
| ENSACAG00000007861 | 1271 YME1L1  |
| ENSACAG00000015899 | 1272 FGF7    |
| ENSACAG00000005554 | 1273 PXDN    |
| ENSACAG00000000236 | 1274 PCGF3   |
| ENSACAG00000006186 | 1275 ANKRD10 |
| ENSACAG00000008269 | 1276 MLLT4   |
| ENSACAG00000008426 | 1277         |
| ENSACAG00000001485 | 1278         |
| ENSACAG00000011984 | 1279 RBMS1   |
| ENSACAG00000003444 | 1280 SMU1    |
| ENSACAG00000005255 | 1281 POLR2D  |
| ENSACAG00000013288 | 1282 BET1    |
| ENSACAG00000002758 | 1283 MRPL57  |
| ENSACAG00000014246 | 1284 TCERG1  |
| ENSACAG00000028414 | 1285 PDCD6   |
| ENSACAG00000001612 | 1286 VEGFA   |
| ENSACAG00000012844 | 1287 KDELR2  |
| ENSACAG00000015489 | 1288 U2AF2   |
| ENSACAG00000015439 | 1289 CENPL   |
| ENSACAG00000005765 | 1290         |
| ENSACAG00000008720 | 1291 LPCAT4  |
| ENSACAG00000011267 | 1292 UBE2E3  |
| ENSACAG00000002780 | 1293 LMNB1   |
| ENSACAG00000010036 | 1294 GTPBP2  |
| ENSACAG00000000567 | 1295         |
| ENSACAG00000010889 | 1296 TOP1    |
| ENSACAG00000007556 | 1297 CS      |
| ENSACAG00000014229 | 1298 METAP1  |
| ENSACAG00000002716 | 1299         |
| ENSACAG00000000021 | 1300 ADIPOR2 |

|                    |               |
|--------------------|---------------|
| ENSACAG00000012939 | 1301 VDAC3    |
| ENSACAG00000016643 | 1302 CYBRD1   |
| ENSACAG00000015109 | 1303 PLPP1    |
| ENSACAG00000017434 | 1304 RIMKLB   |
| ENSACAG00000016034 | 1305 NDUFA3   |
| ENSACAG00000010323 | 1306 AK6      |
| ENSACAG00000005222 | 1307 CEP170   |
| ENSACAG00000002789 | 1308 TLE4     |
| ENSACAG00000009421 | 1309 TPPP     |
| ENSACAG00000011362 | 1310          |
| ENSACAG00000002489 | 1311 EBAG9    |
| ENSACAG00000003976 | 1312 CAP2     |
| ENSACAG00000018004 | 1313 SMAD7    |
| ENSACAG00000025470 | 1314 FERMT2   |
| ENSACAG00000003613 | 1315 RND3     |
| ENSACAG00000007437 | 1316 LBH      |
| ENSACAG00000006040 | 1317 ATP6V1D  |
| ENSACAG00000017831 | 1318 WASF2    |
| ENSACAG00000002265 | 1319 RHEB     |
| ENSACAG00000015675 | 1320 API5     |
| ENSACAG00000003106 | 1321 CCND3    |
| ENSACAG00000012230 | 1322          |
| ENSACAG00000003255 | 1323          |
| ENSACAG00000014224 | 1324 EPB41L2  |
| ENSACAG00000016187 | 1325 C12orf73 |
| ENSACAG00000012326 | 1326 ACYP2    |
| ENSACAG00000002385 | 1327 CFL2     |
| ENSACAG00000015561 | 1328 C12orf65 |
| ENSACAG00000014906 | 1329 RRP15    |
| ENSACAG00000007670 | 1330 MANF     |
| ENSACAG00000017940 | 1331 STAT3    |
| ENSACAG00000000024 | 1332 ERC1     |
| ENSACAG00000009446 | 1333 SLC12A4  |
| ENSACAG00000007123 | 1334 COPZ1    |
| ENSACAG00000010920 | 1335          |
| ENSACAG00000004797 | 1336 PHB      |
| ENSACAG00000004443 | 1337 YEATS4   |
| ENSACAG00000009894 | 1338 MAPRE1   |
| ENSACAG00000007066 | 1339          |
| ENSACAG00000017814 | 1340 CCDC86   |
| ENSACAG00000015992 | 1341 COPS2    |
| ENSACAG00000005600 | 1342 PTBP2    |



|                    |               |
|--------------------|---------------|
| ENSACAG00000014453 | 1343 STT3B    |
| ENSACAG00000005138 | 1344 TMA16    |
| ENSACAG00000012676 | 1345 ZNF217   |
| ENSACAG00000004205 | 1346 C6orf52  |
| ENSACAG00000012549 | 1347 PBX2     |
| ENSACAG00000011547 | 1348 PEAK1    |
| ENSACAG00000000475 | 1349 ACTA2    |
| ENSACAG00000013654 | 1350 SRSF11   |
| ENSACAG00000012797 | 1351 7-Mar    |
| ENSACAG00000000677 | 1352 NSUN2    |
| ENSACAG00000000673 | 1353 C15orf41 |
| ENSACAG00000010195 | 1354 MAEA     |
| ENSACAG00000012654 | 1355 CEP83    |
| ENSACAG00000001412 | 1356 TRAK2    |
| ENSACAG00000013955 | 1357 RRAS     |
| ENSACAG00000002037 | 1358 PICALM   |
| ENSACAG00000027128 | 1359          |
| ENSACAG00000003652 | 1360 TP53BP2  |
| ENSACAG00000009727 | 1361 SEC24C   |
| ENSACAG00000006450 | 1362 EFHD1    |
| ENSACAG00000003772 | 1363 WDR83    |
| ENSACAG00000014078 | 1364 PSD3     |
| ENSACAG00000013168 | 1365          |
| ENSACAG00000007226 | 1366 CYC1     |
| ENSACAG00000006740 | 1367 DCTN2    |
| ENSACAG00000015726 | 1368 SLC44A2  |
| ENSACAG00000008253 | 1369 PLEC     |
| ENSACAG00000011650 | 1370 WLS      |
| ENSACAG00000017360 | 1371 NRXN3    |
| ENSACAG00000009341 | 1372 STK26    |
| ENSACAG00000003149 | 1373 PPHLN1   |
| ENSACAG00000004396 | 1374 PLAUR    |
| ENSACAG00000012512 | 1375 ARL8B    |
| ENSACAG00000003527 | 1376          |
| ENSACAG00000004929 | 1377 CAP1     |
| ENSACAG00000009113 | 1378 AHCY     |
| ENSACAG00000016195 | 1379 LSM14B   |
| ENSACAG00000016572 | 1380 CCDC53   |
| ENSACAG00000029026 | 1381 SFXN3    |
| ENSACAG00000004810 | 1382 TEF      |
| ENSACAG00000006113 | 1383 BNIP3L   |
| ENSACAG00000001376 | 1384 GAK      |

|                    |               |
|--------------------|---------------|
| ENSACAG00000012561 | 1385 HPCAL1   |
| ENSACAG00000007353 | 1386 ZEB1     |
| ENSACAG00000004702 | 1387 MFN1     |
| ENSACAG00000010808 | 1388 MRPL49   |
| ENSACAG00000005961 | 1389 FNTA     |
| ENSACAG00000003167 | 1390 CSNK1G3  |
| ENSACAG00000011372 | 1391 PDS5A    |
| ENSACAG00000009005 | 1392 SBF2     |
| ENSACAG00000013176 | 1393 LZIC     |
| ENSACAG00000012388 | 1394 STRADA   |
| ENSACAG00000012621 | 1395 CLTC     |
| ENSACAG00000002308 | 1396 TMEM208  |
| ENSACAG00000015722 | 1397 BRF1     |
| ENSACAG00000005649 | 1398 LBR      |
| ENSACAG00000007583 | 1399 WAC      |
| ENSACAG00000002824 | 1400 RNF25    |
| ENSACAG00000024133 | 1401          |
| ENSACAG00000017553 | 1402 METRNL   |
| ENSACAG00000010984 | 1403 CHRND    |
| ENSACAG00000017578 | 1404          |
| ENSACAG00000013482 | 1405 WARS     |
| ENSACAG00000007297 | 1406          |
| ENSACAG00000028333 | 1407 GTF2F2   |
| ENSACAG00000027692 | 1408          |
| ENSACAG00000015318 | 1409          |
| ENSACAG00000013756 | 1410          |
| ENSACAG00000012032 | 1411 KCNIP2   |
| ENSACAG00000010154 | 1412 TRANK1   |
| ENSACAG00000010496 | 1413 UXS1     |
| ENSACAG00000007567 | 1414 PWWP2B   |
| ENSACAG00000004940 | 1415 DKK3     |
| ENSACAG00000014999 | 1416          |
| ENSACAG00000009078 | 1417          |
| ENSACAG00000001671 | 1418          |
| ENSACAG00000014599 | 1419 SOCS1    |
| ENSACAG00000016016 | 1420 GPN3     |
| ENSACAG00000012331 | 1421 PSME4    |
| ENSACAG00000012182 | 1422 GADD45G  |
| ENSACAG00000007801 | 1423 GOLPH3   |
| ENSACAG00000023713 | 1424          |
| ENSACAG00000008388 | 1425 EIF4EBP2 |
| ENSACAG00000023212 | 1426 MRPS14   |

|                    |                  |
|--------------------|------------------|
| ENSACAG00000004722 | 1427 ZC3HAV1     |
| ENSACAG00000028695 | 1428 CDCA2       |
| ENSACAG00000022480 | 1429 LSM14A      |
| ENSACAG00000000398 | 1430 CCT7        |
| ENSACAG00000006005 | 1431 ZZZ3        |
| ENSACAG00000010425 | 1432 CNTN6       |
| ENSACAG00000006839 | 1433 FER         |
| ENSACAG00000008837 | 1434 ADK         |
| ENSACAG00000017223 | 1435 NUCB1       |
| ENSACAG00000010493 | 1436 HERC4       |
| ENSACAG00000004628 | 1437 ACSL3       |
| ENSACAG00000012364 | 1438 HCFC1       |
| ENSACAG00000001926 | 1439 TAGLN       |
| ENSACAG00000006975 | 1440 IQCJ-SCHIP1 |
| ENSACAG00000005904 | 1441 PTPN14      |
| ENSACAG00000013916 | 1442 LARS        |
| ENSACAG00000001471 | 1443 NDUFS1      |
| ENSACAG00000014680 | 1444 DYNC1LI1    |
| ENSACAG00000012447 | 1445 SLC11A2     |
| ENSACAG00000016067 | 1446 SMARCE1     |
| ENSACAG00000014415 | 1447 ATP6AP2     |
| ENSACAG00000012667 | 1448 NIPA2       |
| ENSACAG00000009474 | 1449             |
| ENSACAG00000003445 | 1450 UBE2I       |
| ENSACAG00000006812 | 1451 PSMC6       |
| ENSACAG00000006385 | 1452 SLAIN2      |
| ENSACAG00000026666 | 1453             |
| ENSACAG00000012670 | 1454 SPP1        |
| ENSACAG00000000159 | 1455 RIOK3       |
| ENSACAG00000006274 | 1456 NEXN        |
| ENSACAG00000016447 | 1457             |
| ENSACAG00000008384 | 1458 LRRC20      |
| ENSACAG00000000686 | 1459 PARD3       |
| ENSACAG00000007574 | 1460 OSBPL9      |
| ENSACAG00000022605 | 1461 AFF4        |
| ENSACAG00000008389 | 1462 CSNK2A2     |
| ENSACAG00000006916 | 1463 RSL24D1     |
| ENSACAG00000003485 | 1464 MIEN1       |
| ENSACAG00000002757 | 1465             |
| ENSACAG00000023459 | 1466             |
| ENSACAG00000004785 | 1467 RASGEF1A    |
| ENSACAG00000023598 | 1468             |

|                    |               |
|--------------------|---------------|
| ENSACAG00000007995 | 1469 IGF2BP2  |
| ENSACAG00000017431 | 1470 GTF2A1   |
| ENSACAG00000005909 | 1471 STAT1    |
| ENSACAG00000009810 | 1472          |
| ENSACAG00000006734 | 1473 PCMT1    |
| ENSACAG00000015580 | 1474          |
| ENSACAG00000017018 | 1475 OLA1     |
| ENSACAG00000007990 | 1476 ROCK1    |
| ENSACAG00000003556 | 1477 C19orf43 |
| ENSACAG00000009512 | 1478 U2SURP   |
| ENSACAG00000010679 | 1479 CUL4B    |
| ENSACAG00000007061 | 1480 RSAD2    |
| ENSACAG00000009686 | 1481 WDYHV1   |
| ENSACAG00000013203 | 1482 CTNNBIP1 |
| ENSACAG00000001840 | 1483 LEO1     |
| ENSACAG00000006311 | 1484 UBE2Z    |
| ENSACAG00000010199 | 1485 REEP3    |
| ENSACAG00000009888 | 1486 SPARC    |
| ENSACAG00000001549 | 1487 PPA1     |
| ENSACAG00000008089 | 1488 IGF1R    |
| ENSACAG00000004114 | 1489 PLEKHF2  |
| ENSACAG00000006829 | 1490 GFM1     |
| ENSACAG00000003512 | 1491 OTUD4    |
| ENSACAG00000011859 | 1492 SRC      |
| ENSACAG00000005033 | 1493 VAMP3    |
| ENSACAG00000000098 | 1494 PPP2R5C  |
| ENSACAG00000017520 | 1495 MED1     |
| ENSACAG00000004942 | 1496 TMEM183A |
| ENSACAG00000003463 | 1497 RBM12B   |
| ENSACAG00000011807 | 1498 PTP4A2   |
| ENSACAG00000015972 | 1499 PRKD1    |
| ENSACAG00000011203 | 1500 BTRC     |
| ENSACAG00000015168 | 1501 RAD18    |
| ENSACAG00000006554 | 1502 SEC11A   |
| ENSACAG00000024894 | 1503          |
| ENSACAG00000006791 | 1504 SNX1     |
| ENSACAG00000028242 | 1505 ND6      |
| ENSACAG00000011552 | 1506 MYO9A    |
| ENSACAG00000009437 | 1507 NUP160   |
| ENSACAG00000000539 | 1508          |
| ENSACAG00000004368 | 1509 UBE2D1   |
| ENSACAG00000010372 | 1510 MYC      |

|                    |                 |
|--------------------|-----------------|
| ENSACAG00000020944 | 1511 PTPN4      |
| ENSACAG00000012023 | 1512 SLC25A37   |
| ENSACAG00000008734 | 1513 PDE4A      |
| ENSACAG00000000073 | 1514 CARS       |
| ENSACAG00000009750 | 1515 DLGAP4     |
| ENSACAG00000013917 | 1516 MSH2       |
| ENSACAG00000009700 | 1517            |
| ENSACAG00000005419 | 1518 SH3BGR     |
| ENSACAG00000007242 | 1519 NPEPPS     |
| ENSACAG00000002636 | 1520 NCKAP1     |
| ENSACAG00000013613 | 1521 PDLIM5     |
| ENSACAG00000005458 | 1522 DEGS1      |
| ENSACAG00000016726 | 1523 NUDC       |
| ENSACAG00000004124 | 1524 TRAK1      |
| ENSACAG00000001584 | 1525 PRPS2      |
| ENSACAG00000004544 | 1526 PAMR1      |
| ENSACAG00000012423 | 1527 INPP4A     |
| ENSACAG00000009784 | 1528 IDH2       |
| ENSACAG00000007811 | 1529 CBX6       |
| ENSACAG00000007209 | 1530 GPX4       |
| ENSACAG00000002494 | 1531 CSNK1D     |
| ENSACAG00000014549 | 1532            |
| ENSACAG00000006254 | 1533 SLC38A5    |
| ENSACAG00000009690 | 1534 CHCHD1     |
| ENSACAG00000010873 | 1535 SYPL2      |
| ENSACAG00000007483 | 1536 WBP2       |
| ENSACAG00000003413 | 1537 RB1        |
| ENSACAG00000016440 | 1538 CENPH      |
| ENSACAG00000009642 | 1539 KLF7       |
| ENSACAG00000005819 | 1540 ST6GALNAC3 |
| ENSACAG00000001506 | 1541 STK39      |
| ENSACAG00000005826 | 1542 FAM208A    |
| ENSACAG00000013759 | 1543 EIF3J      |
| ENSACAG00000010791 | 1544 MCTS1      |
| ENSACAG00000009539 | 1545 NARS       |
| ENSACAG00000003038 | 1546 SMARCA5    |
| ENSACAG00000005425 | 1547 ATXN2L     |
| ENSACAG00000006943 | 1548 FAM3C      |
| ENSACAG00000016585 | 1549 CNIH1      |
| ENSACAG00000015200 | 1550 SKIV2L2    |
| ENSACAG00000004653 | 1551 EZR        |
| ENSACAG00000012649 | 1552 NXT2       |

|                    |               |
|--------------------|---------------|
| ENSACAG00000015838 | 1553 TRAPPC13 |
| ENSACAG00000004977 | 1554 HS6ST1   |
| ENSACAG00000001891 | 1555          |
| ENSACAG00000007304 | 1556 ANKRD52  |
| ENSACAG00000013983 | 1557 RAP1GDS1 |
| ENSACAG00000025211 | 1558 PSMB7    |
| ENSACAG00000011086 | 1559 CDK1     |
| ENSACAG00000007488 | 1560 SSRP1    |
| ENSACAG00000015011 | 1561 ARSI     |
| ENSACAG00000004552 | 1562 PDCD7    |
| ENSACAG00000017073 | 1563          |
| ENSACAG00000001990 | 1564 UFM1     |
| ENSACAG00000005263 | 1565 WDR33    |
| ENSACAG00000009142 | 1566 TEAD3    |
| ENSACAG00000007550 | 1567          |
| ENSACAG00000014065 | 1568 TMCC1    |
| ENSACAG00000003763 | 1569 PTPN1    |
| ENSACAG00000013995 | 1570 ZUFSP    |
| ENSACAG00000003705 | 1571 GREM2    |
| ENSACAG00000002101 | 1572 EXOSC1   |
| ENSACAG00000012027 | 1573 AHCYL1   |
| ENSACAG00000014864 | 1574 EHD4     |
| ENSACAG00000000643 | 1575 MTA2     |
| ENSACAG00000007917 | 1576 SRP68    |
| ENSACAG00000004478 | 1577 WTAP     |
| ENSACAG00000002309 | 1578 HIPK1    |
| ENSACAG00000004420 | 1579          |
| ENSACAG00000024303 | 1580          |
| ENSACAG00000014131 | 1581 FBXO11   |
| ENSACAG00000017089 | 1582 LDHB     |
| ENSACAG00000015495 | 1583 EIF2B3   |
| ENSACAG00000015523 | 1584 NDUFS4   |
| ENSACAG00000013996 | 1585 SLC25A36 |
| ENSACAG00000001416 | 1586 MSL3     |
| ENSACAG00000015140 | 1587 ATAD1    |
| ENSACAG00000003707 | 1588 RAB31    |
| ENSACAG00000009557 | 1589 MBNL3    |
| ENSACAG00000012406 | 1590 CYFIP1   |
| ENSACAG00000001817 | 1591 SF3B3    |
| ENSACAG00000009598 | 1592 COQ10B   |
| ENSACAG00000005539 | 1593 CTDSPL   |
| ENSACAG00000028483 | 1594 PIGF     |

|                     |                |
|---------------------|----------------|
| ENSACAG00000016718  | 1595 DLST      |
| ENSACAG00000004882  | 1596 PDIA3     |
| ENSACAG00000000349  | 1597 FAM20C    |
| ENSACAG000000010928 | 1598           |
| ENSACAG00000000168  | 1599 USP24     |
| ENSACAG00000009058  | 1600 AURKAIP1  |
| ENSACAG000000010176 | 1601 HIRIP3    |
| ENSACAG00000006532  | 1602 BBX       |
| ENSACAG00000001169  | 1603 TMEM119   |
| ENSACAG000000022476 | 1604 MAF       |
| ENSACAG00000007491  | 1605 VAMP8     |
| ENSACAG00000007867  | 1606 KIAA1524  |
| ENSACAG00000001453  | 1607 SSR3      |
| ENSACAG00000000582  | 1608 SNRPB2    |
| ENSACAG00000004857  | 1609 ZBTB8OS   |
| ENSACAG000000025298 | 1610 MRPL35    |
| ENSACAG00000002642  | 1611 MPHOSPH10 |
| ENSACAG000000011914 | 1612           |
| ENSACAG000000015607 | 1613 SNAI1     |
| ENSACAG00000008570  | 1614 NEDD9     |
| ENSACAG00000003311  | 1615 DNAJC17   |
| ENSACAG000000026375 | 1616           |
| ENSACAG000000010500 | 1617 USP25     |
| ENSACAG000000029575 | 1618           |
| ENSACAG000000016939 | 1619 PRKCSH    |
| ENSACAG000000016513 | 1620 SPIN1     |
| ENSACAG000000029546 | 1621           |
| ENSACAG000000003568 | 1622 YARS      |
| ENSACAG00000007136  | 1623 PIP4K2C   |
| ENSACAG000000012304 | 1624           |
| ENSACAG000000008282 | 1625 ZCCHC11   |
| ENSACAG000000001219 | 1626 MID1      |
| ENSACAG000000002355 | 1627 REST      |
| ENSACAG000000016937 | 1628 ZMPSTE24  |
| ENSACAG000000011643 | 1629 CREB3L2   |
| ENSACAG000000011490 | 1630 RRP9      |
| ENSACAG000000002372 | 1631 SCAF11    |
| ENSACAG000000004072 | 1632 HSPA5     |
| ENSACAG000000018535 | 1633 SNORD50   |
| ENSACAG000000017589 | 1634 FIS1      |
| ENSACAG000000016396 | 1635 FARP1     |
| ENSACAG000000015347 | 1636 CARM1     |

|                    |                 |
|--------------------|-----------------|
| ENSACAG00000003970 | 1637 C2orf194   |
| ENSACAG00000027657 | 1638 AVPI1      |
| ENSACAG00000003074 | 1639 CNPPD1     |
| ENSACAG00000000385 | 1640 PCNA       |
| ENSACAG00000014046 | 1641 LASP1      |
| ENSACAG00000011742 | 1642 ANKRD50    |
| ENSACAG00000016233 | 1643            |
| ENSACAG00000012281 | 1644 TMEM131    |
| ENSACAG00000006123 | 1645 ACTR1B     |
| ENSACAG00000013370 | 1646 PDCD6IP    |
| ENSACAG00000015649 | 1647 ZNF106     |
| ENSACAG00000007577 | 1648 KARS       |
| ENSACAG00000010556 | 1649 FIP1L1     |
| ENSACAG00000002719 | 1650 C1orf21    |
| ENSACAG00000011708 | 1651 CDKL5      |
| ENSACAG00000006577 | 1652 SLC25A30   |
| ENSACAG00000011693 | 1653 KHDRBS1    |
| ENSACAG00000006766 | 1654 ATP6V1A    |
| ENSACAG00000012033 | 1655 BLCAP      |
| ENSACAG00000011085 | 1656 LIG1       |
| ENSACAG00000002085 | 1657 PTPMT1     |
| ENSACAG00000005344 | 1658 HM13       |
| ENSACAG00000017088 | 1659 GADD45GIP1 |
| ENSACAG00000010590 | 1660 PITX2      |
| ENSACAG00000007596 | 1661 OTUD5      |
| ENSACAG00000015469 | 1662 ABLIM3     |
| ENSACAG00000008861 | 1663 PIGP       |
| ENSACAG00000017851 | 1664 RRP1B      |
| ENSACAG00000010300 | 1665            |
| ENSACAG00000005722 | 1666 ARG2       |
| ENSACAG00000000577 | 1667 PDE6B      |
| ENSACAG00000029328 | 1668 HMMR       |
| ENSACAG00000007367 | 1669 PUS1       |
| ENSACAG00000002175 | 1670 RRP12      |
| ENSACAG00000011394 | 1671 CEP170B    |
| ENSACAG00000016653 | 1672 CDKN1A     |
| ENSACAG00000014177 | 1673            |
| ENSACAG00000014338 | 1674 KIF22      |
| ENSACAG00000004680 | 1675            |
| ENSACAG00000009636 | 1676 RBKS       |
| ENSACAG00000016579 | 1677 CAPN1      |
| ENSACAG00000008462 | 1678 RAI14      |



|                    |               |
|--------------------|---------------|
| ENSACAG00000004813 | 1679 USP11    |
| ENSACAG00000003330 | 1680 THG1L    |
| ENSACAG00000017946 | 1681 SLC16A1  |
| ENSACAG00000002521 | 1682 RQCD1    |
| ENSACAG00000009397 | 1683 FKBP9    |
| ENSACAG00000001602 | 1684 CNOT1    |
| ENSACAG00000026569 | 1685          |
| ENSACAG00000004923 | 1686 TDRD3    |
| ENSACAG00000026147 | 1687          |
| ENSACAG00000025484 | 1688 BTBD19   |
| ENSACAG00000005753 | 1689 RPF1     |
| ENSACAG00000005788 | 1690 SRP9     |
| ENSACAG00000012352 | 1691 PIR      |
| ENSACAG00000009874 | 1692 ARPC4    |
| ENSACAG00000006488 | 1693 MTX2     |
| ENSACAG00000003745 | 1694 PPP1R12B |
| ENSACAG00000006830 | 1695 C18orf21 |
| ENSACAG00000008939 | 1696 TOP2B    |
| ENSACAG00000008727 | 1697          |
| ENSACAG00000008824 | 1698 RAB27B   |
| ENSACAG00000011428 | 1699          |
| ENSACAG00000004234 | 1700 HUWE1    |
| ENSACAG00000017027 | 1701 TECR     |
| ENSACAG00000007728 | 1702 PQBP1    |
| ENSACAG00000008580 | 1703 RBM5     |
| ENSACAG00000014955 | 1704 LYRM4    |
| ENSACAG00000006067 | 1705 CARKD    |
| ENSACAG00000017134 | 1706 DDX6     |
| ENSACAG00000006714 | 1707 TSEN54   |
| ENSACAG00000013276 | 1708 SNRNP70  |
| ENSACAG00000008553 | 1709 SRSF2    |
| ENSACAG00000015906 | 1710 PRKCI    |
| ENSACAG00000003982 | 1711 TMEM180  |
| ENSACAG00000008590 | 1712 EBF3     |
| ENSACAG00000001833 | 1713 MOB3C    |
| ENSACAG00000016825 | 1714 BMP5     |
| ENSACAG00000007506 | 1715 PDCD5    |
| ENSACAG00000009972 | 1716 GRAMD1C  |
| ENSACAG00000009923 | 1717 MEF2A    |
| ENSACAG00000010328 | 1718 NSMCE2   |
| ENSACAG00000004221 | 1719 IFNGR2   |
| ENSACAG00000017628 | 1720 DNAJC8   |

|                    |               |
|--------------------|---------------|
| ENSACAG00000004417 | 1721          |
| ENSACAG00000011495 | 1722          |
| ENSACAG00000017001 | 1723 CNN1     |
| ENSACAG00000016645 | 1724 HSPB6    |
| ENSACAG00000001533 | 1725 AFAP1    |
| ENSACAG00000009792 | 1726 G3BP1    |
| ENSACAG00000003717 | 1727 ARHGAP10 |
| ENSACAG00000001685 | 1728 SDF2L1   |
| ENSACAG00000000705 | 1729 NDUFA10  |
| ENSACAG00000005180 | 1730 LDLRAD3  |
| ENSACAG00000004207 | 1731 HDAC5    |
| ENSACAG00000015576 | 1732          |
| ENSACAG00000006987 | 1733 KMT2E    |
| ENSACAG00000007201 | 1734 RUVBL1   |
| ENSACAG00000014139 | 1735 TSPAN5   |
| ENSACAG00000012452 | 1736 IMPDH2   |
| ENSACAG00000017934 | 1737 CAPZA1   |
| ENSACAG00000006247 | 1738 FAF2     |
| ENSACAG00000007949 | 1739 EPHB3    |
| ENSACAG00000005462 | 1740 DIDO1    |
| ENSACAG00000017757 | 1741          |
| ENSACAG00000015551 | 1742 CDK2AP1  |
| ENSACAG00000023506 | 1743 KIAA1551 |
| ENSACAG00000016274 | 1744 LGALS3   |
| ENSACAG00000012690 | 1745          |
| ENSACAG00000003153 | 1746 VANGL1   |
| ENSACAG00000008523 | 1747 IFI30    |
| ENSACAG00000024586 | 1748          |
| ENSACAG00000012099 | 1749 CNOT6L   |
| ENSACAG00000028522 | 1750          |
| ENSACAG00000022310 | 1751          |
| ENSACAG00000005505 | 1752 ENO2     |
| ENSACAG00000014378 | 1753 STRAP    |
| ENSACAG00000003449 | 1754 SNX24    |
| ENSACAG00000011599 | 1755 ARHGAP35 |
| ENSACAG00000016344 | 1756 PAM16    |
| ENSACAG00000013672 | 1757 LTA4H    |
| ENSACAG00000011064 | 1758 PDIA5    |
| ENSACAG00000004051 | 1759          |
| ENSACAG00000012560 | 1760 CYB5R3   |
| ENSACAG00000004178 | 1761 GALNT10  |
| ENSACAG00000011938 | 1762 PTC3     |

|                    |              |
|--------------------|--------------|
| ENSACAG00000011871 | 1763 DUSP6   |
| ENSACAG00000006114 | 1764 TGFB111 |
| ENSACAG00000014855 | 1765 SEC13   |
| ENSACAG00000006879 | 1766 GUK1    |
| ENSACAG00000010120 | 1767 HBS1L   |
| ENSACAG00000011443 | 1768         |
| ENSACAG00000002795 | 1769 VDAC1   |
| ENSACAG00000009116 | 1770 DYRK1A  |
| ENSACAG00000001346 | 1771 LTN1    |
| ENSACAG00000007127 | 1772 SRPK2   |
| ENSACAG00000000963 | 1773 ESF1    |
| ENSACAG00000017794 | 1774 ZDHHC21 |
| ENSACAG00000005011 | 1775 NPL     |
| ENSACAG00000029267 | 1776         |
| ENSACAG00000015321 | 1777 HECTD3  |
| ENSACAG00000011258 | 1778 ITGA5   |
| ENSACAG00000023495 | 1779         |
| ENSACAG00000017898 | 1780 GOLIM4  |
| ENSACAG00000015079 | 1781 SLC48A1 |
| ENSACAG00000007348 | 1782 NMT1    |
| ENSACAG00000009216 | 1783 TRIM25  |
| ENSACAG00000001263 | 1784 NDUFB6  |
| ENSACAG00000008323 | 1785         |
| ENSACAG00000015503 | 1786 GTF2F1  |
| ENSACAG00000017352 | 1787 BCAT1   |
| ENSACAG00000016039 | 1788 ORAOV1  |
| ENSACAG00000000045 | 1789 PIK3C2A |
| ENSACAG00000001623 | 1790 SEC24A  |
| ENSACAG00000017381 | 1791 TPK1    |
| ENSACAG00000008855 | 1792 CMC2    |
| ENSACAG00000017058 | 1793 SF3A3   |
| ENSACAG00000013033 | 1794 DICER1  |
| ENSACAG00000016899 | 1795 TMED10  |
| ENSACAG00000013272 | 1796 TMPO    |
| ENSACAG00000012084 | 1797 PIAS2   |
| ENSACAG00000010698 | 1798 UBE2M   |
| ENSACAG00000014884 | 1799 UQCRFS1 |
| ENSACAG00000000028 | 1800 WNK1    |
| ENSACAG00000028675 | 1801 TRIM44  |
| ENSACAG00000006401 | 1802         |
| ENSACAG00000001362 | 1803 GTF2B   |
| ENSACAG00000010628 | 1804 COPS4   |

|                    |                |
|--------------------|----------------|
| ENSACAG00000010591 | 1805 PPIL1     |
| ENSACAG00000016217 | 1806 TIMP2     |
| ENSACAG00000013584 | 1807 DNAJA2    |
| ENSACAG00000000397 | 1808 AHCTF1    |
| ENSACAG00000000441 | 1809 CIRBP     |
| ENSACAG00000013734 | 1810           |
| ENSACAG00000015063 | 1811 UBE2G1    |
| ENSACAG00000020037 | 1812           |
| ENSACAG00000006615 | 1813 NFE2L1    |
| ENSACAG00000007951 | 1814 EXOC7     |
| ENSACAG00000017886 | 1815 C14orf166 |
| ENSACAG00000009425 | 1816 HDAC4     |
| ENSACAG00000010402 | 1817           |
| ENSACAG00000002168 | 1818 ATP5D     |
| ENSACAG00000017261 | 1819 SPTLC2    |
| ENSACAG00000003292 | 1820 MRPS22    |
| ENSACAG00000012630 | 1821 CCNA2     |
| ENSACAG00000016989 | 1822 LUZP1     |
| ENSACAG00000010523 | 1823 MAD1L1    |
| ENSACAG00000016746 | 1824 SYNGR2    |
| ENSACAG00000008316 | 1825 TRAIIP    |
| ENSACAG00000018692 | 1826           |
| ENSACAG00000004601 | 1827 NT5C2     |
| ENSACAG00000015223 | 1828 GTF2H3    |
| ENSACAG00000012860 | 1829 UTP3      |
| ENSACAG00000013258 | 1830 SYNE3     |
| ENSACAG00000005394 | 1831 ZNF346    |
| ENSACAG00000001764 | 1832 KLF12     |
| ENSACAG00000005555 | 1833 GSE1      |
| ENSACAG00000014369 | 1834 CMTR1     |
| ENSACAG00000009416 | 1835 WDR48     |
| ENSACAG00000002423 | 1836 SMARCA2   |
| ENSACAG00000002883 | 1837 RTN3      |
| ENSACAG00000014886 | 1838 STRN3     |
| ENSACAG00000017639 | 1839 SUPT20H   |
| ENSACAG00000004477 | 1840 NAA38     |
| ENSACAG00000025881 | 1841           |
| ENSACAG00000012096 | 1842 RP2       |
| ENSACAG00000000907 | 1843 MICU1     |
| ENSACAG00000012648 | 1844 TMEM123   |
| ENSACAG00000006339 | 1845           |
| ENSACAG00000013393 | 1846 ELOVL1    |

|                    |               |
|--------------------|---------------|
| ENSACAG00000014404 | 1847 MDN1     |
| ENSACAG00000000295 | 1848 ASH2L    |
| ENSACAG00000013754 | 1849 TIMMDC1  |
| ENSACAG00000006352 | 1850 CALCOCO2 |
| ENSACAG00000006594 | 1851 CBX1     |
| ENSACAG00000010376 | 1852 FAM49B   |
| ENSACAG00000003767 | 1853 COX15    |
| ENSACAG00000014892 | 1854          |
| ENSACAG00000006843 | 1855 GALNT1   |
| ENSACAG00000001932 | 1856          |
| ENSACAG00000005798 | 1857 NUF2     |
| ENSACAG00000004088 | 1858 RNPS1    |
| ENSACAG00000003692 | 1859 PNPT1    |
| ENSACAG00000007158 | 1860 PHB2     |
| ENSACAG00000012175 | 1861 FNIP1    |
| ENSACAG00000014279 | 1862 ST3GAL3  |
| ENSACAG00000012984 | 1863 MAT2A    |
| ENSACAG00000017556 | 1864 NDEL1    |
| ENSACAG00000029385 | 1865 PSMC4    |
| ENSACAG00000022029 | 1866          |
| ENSACAG00000028836 | 1867          |
| ENSACAG00000004069 | 1868 RALB     |
| ENSACAG00000005744 | 1869 EHBP1    |
| ENSACAG00000002304 | 1870 TRABD    |
| ENSACAG00000011455 | 1871 AKT1     |
| ENSACAG00000005132 | 1872 ARID1B   |
| ENSACAG00000023444 | 1873          |
| ENSACAG00000014583 | 1874 PSMC1    |
| ENSACAG00000003747 | 1875 CYB5A    |
| ENSACAG00000016861 | 1876 RNF4     |
| ENSACAG00000000746 | 1877          |
| ENSACAG00000009764 | 1878 POLR1C   |
| ENSACAG00000017754 | 1879 OPCML    |
| ENSACAG00000017333 | 1880 FOXK2    |
| ENSACAG00000012781 | 1881 SDAD1    |
| ENSACAG00000014810 | 1882 IL6ST    |
| ENSACAG00000012450 | 1883 EEA1     |
| ENSACAG00000002427 | 1884 UTP18    |
| ENSACAG00000012998 | 1885 ACAD9    |
| ENSACAG00000003876 | 1886 ARHGAP1  |
| ENSACAG00000001178 | 1887 PTGS2    |
| ENSACAG00000002163 | 1888 RNF38    |

|                    |               |
|--------------------|---------------|
| ENSACAG00000003917 | 1889 DNAJC19  |
| ENSACAG00000017601 | 1890 RAB3IL1  |
| ENSACAG00000015441 | 1891 SBNO1    |
| ENSACAG00000015788 | 1892 HIP1R    |
| ENSACAG00000003912 | 1893 RRN3     |
| ENSACAG00000016885 | 1894 C17orf62 |
| ENSACAG00000005966 | 1895 LRP1     |
| ENSACAG00000005510 | 1896 CNIH4    |
| ENSACAG00000007035 | 1897 GNPDA2   |
| ENSACAG00000017359 | 1898 CDC27    |
| ENSACAG00000003714 | 1899 RIF1     |
| ENSACAG00000001747 | 1900 CFLAR    |
| ENSACAG00000001586 | 1901 LUC7L3   |
| ENSACAG00000013159 | 1902 MAP7D1   |
| ENSACAG00000001961 | 1903 NOCT     |
| ENSACAG00000007543 | 1904 CHCHD6   |
| ENSACAG00000001666 | 1905 ATP6V0C  |
| ENSACAG00000001575 | 1906 UBXN4    |
| ENSACAG00000010512 | 1907 PTPRK    |
| ENSACAG00000017208 | 1908 FLOT1    |
| ENSACAG00000016145 | 1909 SEC14L1  |
| ENSACAG00000008649 | 1910 CCNT1    |
| ENSACAG00000009383 | 1911 BRD9     |
| ENSACAG00000016607 | 1912 GMFB     |
| ENSACAG00000008527 | 1913 CDC42EP3 |
| ENSACAG00000003196 | 1914 PAXBP1   |
| ENSACAG00000016828 | 1915 PDGFC    |
| ENSACAG00000011832 | 1916 GADD45A  |
| ENSACAG00000001192 | 1917 FARP2    |
| ENSACAG00000005177 | 1918 SUMO1    |
| ENSACAG00000012880 | 1919 SEPT8    |
| ENSACAG00000003204 | 1920 YAF2     |
| ENSACAG00000015864 | 1921          |
| ENSACAG00000024819 | 1922          |
| ENSACAG00000008581 | 1923 PRTFDC1  |
| ENSACAG00000004700 | 1924          |
| ENSACAG00000006283 | 1925 SHMT2    |
| ENSACAG00000009859 | 1926 OXSR1    |
| ENSACAG00000016081 | 1927 ANO3     |
| ENSACAG00000014328 | 1928          |
| ENSACAG00000003193 | 1929 SUPT16H  |
| ENSACAG00000006035 | 1930 USP33    |

|                    |               |
|--------------------|---------------|
| ENSACAG00000011849 | 1931          |
| ENSACAG00000000864 | 1932 RASA3    |
| ENSACAG00000016501 | 1933 GORASP2  |
| ENSACAG00000010217 | 1934 NDUFV1   |
| ENSACAG00000015446 | 1935 SARNP    |
| ENSACAG00000015095 | 1936 DHX33    |
| ENSACAG00000002050 | 1937 SNED1    |
| ENSACAG00000016155 | 1938 STK3     |
| ENSACAG00000001172 | 1939 ISCU     |
| ENSACAG00000016488 | 1940 NPC2     |
| ENSACAG00000006658 | 1941 OSBP     |
| ENSACAG00000026400 | 1942          |
| ENSACAG00000000071 | 1943 PSMG1    |
| ENSACAG00000002674 | 1944 CASC3    |
| ENSACAG00000002435 | 1945 AATF     |
| ENSACAG00000009263 | 1946 MOB2     |
| ENSACAG00000012176 | 1947          |
| ENSACAG00000021221 | 1948 SNORD65  |
| ENSACAG00000011202 | 1949          |
| ENSACAG00000002009 | 1950 SPRED2   |
| ENSACAG00000005027 | 1951          |
| ENSACAG00000013589 | 1952 DCTD     |
| ENSACAG00000004118 | 1953 NUP153   |
| ENSACAG00000015528 | 1954 CKAP4    |
| ENSACAG00000009965 | 1955 TMEM65   |
| ENSACAG00000012157 | 1956 MCM4     |
| ENSACAG00000006424 | 1957 MARCH5   |
| ENSACAG00000023742 | 1958          |
| ENSACAG00000004744 | 1959 DSN1     |
| ENSACAG00000007132 | 1960 PBRM1    |
| ENSACAG00000004604 | 1961 CYP20A1  |
| ENSACAG00000015302 | 1962          |
| ENSACAG00000012627 | 1963 C18orf25 |
| ENSACAG00000017080 | 1964 CERS5    |
| ENSACAG00000017734 | 1965 DDOST    |
| ENSACAG00000004976 | 1966 USP47    |
| ENSACAG00000007905 | 1967 WHSC1    |
| ENSACAG00000016427 | 1968 ANKRD46  |
| ENSACAG00000014384 | 1969 EIF4A3   |
| ENSACAG00000015598 | 1970 SEMA3C   |
| ENSACAG00000015514 | 1971 TSPAN4   |
| ENSACAG00000017576 | 1972 INHBA    |

|                    |                 |
|--------------------|-----------------|
| ENSACAG00000015844 | 1973 TLL12      |
| ENSACAG00000016928 | 1974            |
| ENSACAG00000003838 | 1975            |
| ENSACAG00000003644 | 1976 NMI        |
| ENSACAG00000004397 | 1977 CCDC134    |
| ENSACAG00000029680 | 1978 PPP2R5A    |
| ENSACAG00000003142 | 1979            |
| ENSACAG00000009544 | 1980 DENND1B    |
| ENSACAG00000001853 | 1981 SS18       |
| ENSACAG00000005148 | 1982 EP300      |
| ENSACAG00000001554 | 1983 BICD2      |
| ENSACAG00000000755 | 1984            |
| ENSACAG00000013207 | 1985 PRKAR1A    |
| ENSACAG00000009769 | 1986            |
| ENSACAG00000004041 | 1987 MARCKSL1   |
| ENSACAG00000005844 | 1988 PRKACB     |
| ENSACAG00000009451 | 1989 MPZL1      |
| ENSACAG00000008210 | 1990 WDR3       |
| ENSACAG00000006206 | 1991 SEMA4C     |
| ENSACAG00000012399 | 1992 PEF1       |
| ENSACAG00000008261 | 1993 PTTG1IP    |
| ENSACAG00000014866 | 1994 NCOR2      |
| ENSACAG00000014374 | 1995 KCTD13     |
| ENSACAG00000009952 | 1996 MRPL16     |
| ENSACAG00000015717 | 1997 AKAP9      |
| ENSACAG00000013009 | 1998 SLC35A4    |
| ENSACAG00000016947 | 1999            |
| ENSACAG00000004748 | 2000 CSGALNACT2 |
| ENSACAG00000016948 | 2001            |
| ENSACAG00000013661 | 2002 CTDSPL2    |
| ENSACAG00000017846 | 2003 RCAN3      |
| ENSACAG00000006919 | 2004            |
| ENSACAG00000013465 | 2005 NAT10      |
| ENSACAG00000004500 | 2006 RAPH1      |
| ENSACAG00000011679 | 2007 RNASEH2B   |
| ENSACAG00000009151 | 2008 LPIN2      |
| ENSACAG00000015985 | 2009 TBC1D16    |
| ENSACAG00000012742 | 2010 YAP1       |
| ENSACAG00000000488 | 2011 MEF2C      |
| ENSACAG00000001399 | 2012 C1orf27    |
| ENSACAG00000009258 | 2013 PHF3       |
| ENSACAG00000013683 | 2014            |



|                     |               |
|---------------------|---------------|
| ENSACAG00000010273  | 2015 COL18A1  |
| ENSACAG00000013195  | 2016 PTPN21   |
| ENSACAG00000001573  | 2017 TAF11    |
| ENSACAG000000016894 | 2018 NARF     |
| ENSACAG000000009566 | 2019 IQSEC2   |
| ENSACAG000000016849 | 2020 PKN1     |
| ENSACAG000000013897 | 2021          |
| ENSACAG000000001909 | 2022 PPP1R7   |
| ENSACAG000000008365 | 2023 CORO1B   |
| ENSACAG000000010581 | 2024 ZNF638   |
| ENSACAG000000015872 | 2025 GEMIN2   |
| ENSACAG000000001269 | 2026 H2AFY    |
| ENSACAG000000005709 | 2027 MGST3    |
| ENSACAG000000013275 | 2028          |
| ENSACAG000000004673 | 2029 VWA9     |
| ENSACAG000000027805 | 2030 PRIM1    |
| ENSACAG000000005221 | 2031 PLCD1    |
| ENSACAG000000016401 | 2032 RNF19A   |
| ENSACAG000000015051 | 2033 CTSB     |
| ENSACAG000000007592 | 2034 FBRSL1   |
| ENSACAG000000005002 | 2035          |
| ENSACAG000000015931 | 2036          |
| ENSACAG000000010379 | 2037 ZFYVE16  |
| ENSACAG000000004323 | 2038 CD44     |
| ENSACAG000000013003 | 2039 RUNX2    |
| ENSACAG000000001712 | 2040 RAB9A    |
| ENSACAG000000008267 | 2041 LRRC47   |
| ENSACAG000000028558 | 2042 EIF4EBP1 |
| ENSACAG000000002058 | 2043 ABCC4    |
| ENSACAG000000003726 | 2044 NUSAP1   |
| ENSACAG000000014605 | 2045 GPBP1    |
| ENSACAG000000011546 | 2046 PANK3    |
| ENSACAG000000003402 | 2047 ATP1A1   |
| ENSACAG000000014345 | 2048 WAPL     |
| ENSACAG000000017037 | 2049 FHL3     |
| ENSACAG000000009153 | 2050 OASL     |
| ENSACAG000000003599 | 2051 PPP4R1   |
| ENSACAG000000005514 | 2052 WDR26    |
| ENSACAG000000003078 | 2053 DAD1     |
| ENSACAG000000012522 | 2054 GPATCH8  |
| ENSACAG000000009680 | 2055 STAT6    |
| ENSACAG000000002065 | 2056 PPP1CC   |

|                    |               |
|--------------------|---------------|
| ENSACAG00000009298 | 2057 EWSR1    |
| ENSACAG00000029662 | 2058          |
| ENSACAG00000008113 | 2059 PPP1CA   |
| ENSACAG00000011035 | 2060 RBM33    |
| ENSACAG00000001823 | 2061 KIF23    |
| ENSACAG00000004922 | 2062 REPS1    |
| ENSACAG00000016730 | 2063 TK1      |
| ENSACAG00000016986 | 2064 TIAL1    |
| ENSACAG00000009891 | 2065 ECH1     |
| ENSACAG00000017304 | 2066 ETNK1    |
| ENSACAG00000014482 | 2067 NEK7     |
| ENSACAG00000005297 | 2068 C8orf33  |
| ENSACAG00000029104 | 2069 STRA13   |
| ENSACAG00000014179 | 2070 MRPL37   |
| ENSACAG00000005086 | 2071 TFDP2    |
| ENSACAG00000013888 | 2072 COA3     |
| ENSACAG00000013442 | 2073 TBL1XR1  |
| ENSACAG00000006954 | 2074          |
| ENSACAG00000008068 | 2075 PPP2R2D  |
| ENSACAG00000012190 | 2076          |
| ENSACAG00000014104 | 2077 TMEM59   |
| ENSACAG00000005757 | 2078 C6orf203 |
| ENSACAG00000003160 | 2079 PSMD3    |
| ENSACAG00000002172 | 2080 GBE1     |
| ENSACAG00000015785 | 2081 CDK14    |
| ENSACAG00000012087 | 2082 SLC30A9  |
| ENSACAG00000007717 | 2083 WDR41    |
| ENSACAG00000009361 | 2084 DYNLRB1  |
| ENSACAG00000002544 | 2085 PABPC4   |
| ENSACAG00000004943 | 2086 RANGAP1  |
| ENSACAG00000016419 | 2087 CCNB1    |
| ENSACAG00000008479 | 2088 EPN2     |
| ENSACAG00000012961 | 2089 ASNS     |
| ENSACAG00000016644 | 2090 ZDHHC18  |
| ENSACAG00000014552 | 2091 LIMD1    |
| ENSACAG00000005476 | 2092 NVL      |
| ENSACAG00000028554 | 2093 NOL7     |
| ENSACAG00000011947 | 2094 YKT6     |
| ENSACAG00000012553 | 2095 SCARB2   |
| ENSACAG00000007919 | 2096 ANKRD1   |
| ENSACAG00000015772 | 2097 PPWD1    |
| ENSACAG00000005023 | 2098 DHX9     |

|                    |               |
|--------------------|---------------|
| ENSACAG00000004097 | 2099 TINF2    |
| ENSACAG00000001437 | 2100 DDX46    |
| ENSACAG00000006163 | 2101          |
| ENSACAG00000007143 | 2102 DTD1     |
| ENSACAG00000009201 | 2103 NOL8     |
| ENSACAG00000002180 | 2104 THRAP3   |
| ENSACAG00000006230 | 2105 NUP85    |
| ENSACAG00000014491 | 2106 NUAKE2   |
| ENSACAG00000011971 | 2107 DIAPH1   |
| ENSACAG00000003571 | 2108 MMADHC   |
| ENSACAG00000017196 | 2109          |
| ENSACAG00000015090 | 2110 CCDC137  |
| ENSACAG00000016062 | 2111 ANAPC7   |
| ENSACAG00000015442 | 2112 GHITM    |
| ENSACAG00000004445 | 2113 CLASP1   |
| ENSACAG00000001287 | 2114 MMP14    |
| ENSACAG00000007327 | 2115 ZFC3H1   |
| ENSACAG00000006279 | 2116 GLYR1    |
| ENSACAG00000014352 | 2117 ALX4     |
| ENSACAG00000014712 | 2118 PNR1     |
| ENSACAG00000008843 | 2119 PCBD1    |
| ENSACAG00000005478 | 2120 TMEM104  |
| ENSACAG00000012480 | 2121          |
| ENSACAG00000016606 | 2122 STK38    |
| ENSACAG00000008834 | 2123 ITPK1    |
| ENSACAG00000004827 | 2124 ETV4     |
| ENSACAG00000008814 | 2125          |
| ENSACAG00000004806 | 2126 MYEF2    |
| ENSACAG00000005366 | 2127 DAZAP1   |
| ENSACAG00000001063 | 2128 GET4     |
| ENSACAG00000002224 | 2129 IVNS1ABP |
| ENSACAG00000017541 | 2130          |
| ENSACAG00000000497 | 2131 PAPD7    |
| ENSACAG00000008695 | 2132 G3BP2    |
| ENSACAG00000000119 | 2133 CETN3    |
| ENSACAG00000014881 | 2134 NEK6     |
| ENSACAG00000009312 | 2135 NIPBL    |
| ENSACAG00000019044 | 2136 SNORA13  |
| ENSACAG00000004774 | 2137 WDR12    |
| ENSACAG00000006415 | 2138 KPNA1    |
| ENSACAG00000007147 | 2139 C1QBP    |
| ENSACAG00000010466 | 2140 NCK2     |

|                    |              |
|--------------------|--------------|
| ENSACAG00000003431 | 2141 TNC     |
| ENSACAG00000006866 | 2142 KATNA1  |
| ENSACAG00000002285 | 2143 SLC38A1 |
| ENSACAG00000012551 | 2144 CCDC43  |
| ENSACAG00000003875 | 2145 MRPL22  |
| ENSACAG00000003364 | 2146 RASSF3  |
| ENSACAG00000008260 | 2147 GLRX2   |
| ENSACAG00000017590 | 2148 KDSR    |
| ENSACAG00000007441 | 2149 UTRN    |
| ENSACAG00000000942 | 2150 MITD1   |
| ENSACAG00000010664 | 2151         |
| ENSACAG00000028496 | 2152 SNU13   |
| ENSACAG00000005774 | 2153 ERGIC3  |
| ENSACAG00000009774 | 2154 RMDN1   |
| ENSACAG00000004105 | 2155 NDUFAF6 |
| ENSACAG00000005783 | 2156 NOP56   |
| ENSACAG00000000556 | 2157 GMPS    |
| ENSACAG00000015893 | 2158 G2E3    |
| ENSACAG00000012469 | 2159 ALG8    |
| ENSACAG00000015089 | 2160 CLK3    |
| ENSACAG00000006991 | 2161 CSNK1G1 |
| ENSACAG00000028775 | 2162         |
| ENSACAG00000010965 | 2163 ZCCHC9  |
| ENSACAG00000001517 | 2164 CENPT   |
| ENSACAG00000017463 | 2165 LANCL2  |
| ENSACAG00000014931 | 2166 IRAK2   |
| ENSACAG00000005380 | 2167 RAB5B   |
| ENSACAG00000012614 | 2168 SEPHS2  |
| ENSACAG00000001111 | 2169 GPI     |
| ENSACAG00000028340 | 2170 RAP1A   |
| ENSACAG00000006166 | 2171 BOLA3   |
| ENSACAG00000008048 | 2172 KIF20B  |
| ENSACAG00000001088 | 2173 ATXN7   |
| ENSACAG00000003202 | 2174 gsk3a   |
| ENSACAG00000011692 | 2175 RCN2    |
| ENSACAG00000005071 | 2176 MRPS6   |
| ENSACAG00000004128 | 2177 NRP2    |
| ENSACAG00000007057 | 2178 JUN     |
| ENSACAG00000014111 | 2179 PUSL1   |
| ENSACAG00000014610 | 2180         |
| ENSACAG00000017226 | 2181         |
| ENSACAG00000013281 | 2182 TSPAN31 |

|                    |              |
|--------------------|--------------|
| ENSACAG00000018008 | 2183         |
| ENSACAG00000015098 | 2184 HDAC7   |
| ENSACAG00000006436 | 2185 RBM39   |
| ENSACAG00000006679 | 2186 TWF2    |
| ENSACAG00000012832 | 2187 PDAP1   |
| ENSACAG00000000561 | 2188         |
| ENSACAG00000009852 | 2189 MVB12B  |
| ENSACAG00000014432 | 2190 BUB1B   |
| ENSACAG00000010771 | 2191 ABCC5   |
| ENSACAG00000000954 | 2192 RAP2A   |
| ENSACAG00000017593 | 2193 HNRNPR  |
| ENSACAG00000013070 | 2194 ZCCHC10 |
| ENSACAG00000016320 | 2195 RAPGEF2 |
| ENSACAG00000008641 | 2196 ATRX    |
| ENSACAG00000006115 | 2197 CUL5    |
| ENSACAG00000004566 | 2198 CLPX    |
| ENSACAG00000004457 | 2199 FAM174A |
| ENSACAG00000014574 | 2200 TTC4    |
| ENSACAG00000023449 | 2201 STAT2   |
| ENSACAG00000013669 | 2202         |
| ENSACAG00000005341 | 2203 MEA1    |
| ENSACAG00000017841 | 2204         |
| ENSACAG00000007050 | 2205 SASH1   |
| ENSACAG00000000916 | 2206 KLF9    |
| ENSACAG00000017758 | 2207 DDB1    |
| ENSACAG00000007210 | 2208         |
| ENSACAG00000023980 | 2209         |
| ENSACAG00000015119 | 2210 NPLOC4  |
| ENSACAG00000017315 | 2211 AKAP8L  |
| ENSACAG00000004180 | 2212 TAF3    |
| ENSACAG00000000426 | 2213 MFGE8   |
| ENSACAG00000009087 | 2214 CENPP   |
| ENSACAG00000003430 | 2215 ORC4    |
| ENSACAG00000009329 | 2216 DCAF6   |
| ENSACAG00000028607 | 2217 SEC61G  |
| ENSACAG00000015736 | 2218 GLRX3   |
| ENSACAG00000016379 | 2219 RUFY1   |
| ENSACAG00000000201 | 2220 NPC1    |
| ENSACAG00000017531 | 2221 AEBP2   |
| ENSACAG00000002088 | 2222 BOD1L1  |
| ENSACAG00000006897 | 2223 MRPL55  |
| ENSACAG00000018003 | 2224 FGFR1   |

|                    |              |
|--------------------|--------------|
| ENSACAG00000008480 | 2225 RBM6    |
| ENSACAG00000003572 | 2226 HIAT1   |
| ENSACAG00000000839 | 2227 CRLS1   |
| ENSACAG00000001802 | 2228 MARK1   |
| ENSACAG00000006607 | 2229 PATL1   |
| ENSACAG00000007511 | 2230         |
| ENSACAG00000001395 | 2231 PARD6G  |
| ENSACAG00000015811 | 2232 ZNF185  |
| ENSACAG00000017597 | 2233 CDK13   |
| ENSACAG00000000026 | 2234 RAD52   |
| ENSACAG00000017877 | 2235         |
| ENSACAG00000016659 | 2236 HMOX1   |
| ENSACAG00000001646 | 2237 SORCS2  |
| ENSACAG00000000195 | 2238 ADGRA2  |
| ENSACAG00000003011 | 2239 SRGAP1  |
| ENSACAG00000001613 | 2240 SMC6    |
| ENSACAG00000017506 | 2241 PLAA    |
| ENSACAG00000016837 | 2242 YTHDF3  |
| ENSACAG00000017789 | 2243         |
| ENSACAG00000011792 | 2244 SMURF1  |
| ENSACAG00000004129 | 2245 ZDHHC3  |
| ENSACAG00000007257 | 2246 TAB3    |
| ENSACAG00000015652 | 2247 TUBA1A  |
| ENSACAG00000010527 | 2248 SLC19A2 |
| ENSACAG00000005369 | 2249 DNTTIP2 |
| ENSACAG00000012012 | 2250 CAMK2B  |
| ENSACAG00000029372 | 2251 STC2    |
| ENSACAG00000007564 | 2252 SEC11C  |
| ENSACAG00000003900 | 2253 GEMIN5  |
| ENSACAG00000005764 | 2254 PDSS2   |
| ENSACAG00000004047 | 2255 PRPF39  |
| ENSACAG00000006461 | 2256 NUFIP1  |
| ENSACAG00000017450 | 2257 SCO1    |
| ENSACAG00000006682 | 2258 PRIM2   |
| ENSACAG00000028281 | 2259 TSNARE1 |
| ENSACAG00000011676 | 2260 PDHB    |
| ENSACAG00000029485 | 2261         |
| ENSACAG00000008569 | 2262 YIPF4   |
| ENSACAG00000006922 | 2263 TMEM245 |
| ENSACAG00000003522 | 2264 CYB5B   |
| ENSACAG00000006872 | 2265 MAPRE2  |
| ENSACAG00000028755 | 2266 WDR77   |

|                    |              |
|--------------------|--------------|
| ENSACAG00000010001 | 2267         |
| ENSACAG00000014777 | 2268 TM9SF3  |
| ENSACAG00000014950 | 2269 ABHD5   |
| ENSACAG00000022695 | 2270         |
| ENSACAG00000004428 | 2271 PARD3B  |
| ENSACAG00000002823 | 2272 CSTF3   |
| ENSACAG00000009988 | 2273 ANTXR2  |
| ENSACAG00000005095 | 2274 RABIF   |
| ENSACAG00000015966 | 2275 KRI1    |
| ENSACAG00000002186 | 2276 CXXC5   |
| ENSACAG00000002091 | 2277 RANBP2  |
| ENSACAG00000017278 | 2278         |
| ENSACAG00000006558 | 2279 TMED9   |
| ENSACAG00000000946 | 2280 MAMDC2  |
| ENSACAG00000015596 | 2281 GRPEL2  |
| ENSACAG00000010247 | 2282 ASPSCR1 |
| ENSACAG00000001979 | 2283 ELF2    |
| ENSACAG00000005059 | 2284 DUT     |
| ENSACAG00000004732 | 2285 ADRM1   |
| ENSACAG00000007784 | 2286 RFTN1   |
| ENSACAG00000012674 | 2287 ITPA    |
| ENSACAG00000015968 | 2288 AURKA   |
| ENSACAG00000025457 | 2289         |
| ENSACAG00000011038 | 2290 STX18   |
| ENSACAG00000015508 | 2291 SNX18   |
| ENSACAG00000015056 | 2292 MAPK3   |
| ENSACAG00000011210 | 2293 CHD1    |
| ENSACAG00000014912 | 2294         |
| ENSACAG00000006334 | 2295 JADE1   |
| ENSACAG00000005379 | 2296 OSTF1   |
| ENSACAG00000008878 | 2297 TAF2    |
| ENSACAG00000017718 | 2298 MAN1A1  |
| ENSACAG00000008963 | 2299         |
| ENSACAG00000012126 | 2300 DBNDD2  |
| ENSACAG00000001396 | 2301 ABCC3   |
| ENSACAG00000000428 | 2302         |
| ENSACAG00000016551 | 2303 NUP37   |
| ENSACAG00000007433 | 2304 EPS15   |
| ENSACAG00000028215 | 2305 ND1     |
| ENSACAG00000025586 | 2306 LRPAP1  |
| ENSACAG00000003205 | 2307 CLINT1  |
| ENSACAG00000018248 | 2308 SNORA18 |

|                    |               |
|--------------------|---------------|
| ENSACAG00000016700 | 2309 BAZ2A    |
| ENSACAG00000003544 | 2310 SMAD1    |
| ENSACAG00000005944 | 2311 SHC4     |
| ENSACAG00000016764 | 2312 PIM1     |
| ENSACAG00000010832 | 2313 ADGRE5   |
| ENSACAG00000004188 | 2314          |
| ENSACAG00000010368 | 2315 SETD5    |
| ENSACAG00000015205 | 2316 ANO5     |
| ENSACAG00000000687 | 2317 AQR      |
| ENSACAG00000016519 | 2318          |
| ENSACAG00000012543 | 2319 OSTC     |
| ENSACAG00000008264 | 2320 CSNK1E   |
| ENSACAG00000013921 | 2321 NOSIP    |
| ENSACAG00000009497 | 2322 ZNF318   |
| ENSACAG00000012186 | 2323 URI1     |
| ENSACAG00000009530 | 2324 LSM5     |
| ENSACAG00000017505 | 2325 FBXL20   |
| ENSACAG00000002694 | 2326 CENPU    |
| ENSACAG00000016689 | 2327 RSU1     |
| ENSACAG00000029129 | 2328          |
| ENSACAG00000007185 | 2329 UGDH     |
| ENSACAG00000002477 | 2330 HEATR1   |
| ENSACAG00000015088 | 2331 CUX1     |
| ENSACAG00000002166 | 2332 SAPCD2   |
| ENSACAG00000029091 | 2333          |
| ENSACAG00000016018 | 2334 SKIL     |
| ENSACAG00000004414 | 2335          |
| ENSACAG00000015653 | 2336          |
| ENSACAG00000004011 | 2337 SAE1     |
| ENSACAG00000014727 | 2338 SUV420H1 |
| ENSACAG00000006316 | 2339 MYO1B    |
| ENSACAG00000008723 | 2340 SEMA3F   |
| ENSACAG00000014715 | 2341 TIMM9    |
| ENSACAG00000003124 | 2342 SLC30A7  |
| ENSACAG00000015042 | 2343 AKR1A1   |
| ENSACAG00000002328 | 2344 BAZ1A    |
| ENSACAG00000023832 | 2345          |
| ENSACAG00000015044 | 2346 SNRK     |
| ENSACAG00000003664 | 2347          |
| ENSACAG00000011232 | 2348 MRPS9    |
| ENSACAG00000001896 | 2349 PSMA6    |
| ENSACAG00000012835 | 2350 SMC2     |



|                    |               |
|--------------------|---------------|
| ENSACAG00000011459 | 2351 COX4I2   |
| ENSACAG00000012088 | 2352 STK4     |
| ENSACAG00000016048 | 2353 DNAL1    |
| ENSACAG00000000064 | 2354 SPTY2D1  |
| ENSACAG00000015585 | 2355 RASGRF1  |
| ENSACAG00000011706 | 2356 ABHD17C  |
| ENSACAG00000014543 | 2357 BMPR1A   |
| ENSACAG00000017060 | 2358 GPATCH2L |
| ENSACAG00000016404 | 2359 SF1      |
| ENSACAG00000014186 | 2360 EIF4E    |
| ENSACAG00000005030 | 2361 FILIP1   |
| ENSACAG00000002951 | 2362 SH3D19   |
| ENSACAG00000013606 | 2363 MALSU1   |
| ENSACAG00000007533 | 2364 TRIM47   |
| ENSACAG00000001987 | 2365 EPST11   |
| ENSACAG00000007538 | 2366 CYHR1    |
| ENSACAG00000001411 | 2367 CEBPZ    |
| ENSACAG00000016088 | 2368 DBF4     |
| ENSACAG00000011154 | 2369 CNOT4    |
| ENSACAG00000011034 | 2370 PDLIM2   |
| ENSACAG00000002886 | 2371 AKT2     |
| ENSACAG00000005754 | 2372 MKLN1    |
| ENSACAG00000016625 | 2373 FAM188A  |
| ENSACAG00000004291 | 2374          |
| ENSACAG00000003208 | 2375 ARHGEF12 |
| ENSACAG00000010074 | 2376 MSRA     |
| ENSACAG00000005332 | 2377 ZNF516   |
| ENSACAG00000017310 | 2378 TTN      |
| ENSACAG00000013657 | 2379 RMDN3    |
| ENSACAG00000003734 | 2380 C19orf66 |
| ENSACAG00000013617 | 2381 CEBPG    |
| ENSACAG00000010601 | 2382 AP1AR    |
| ENSACAG00000012470 | 2383 TAPT1    |
| ENSACAG00000002413 | 2384 RARA     |
| ENSACAG00000004587 | 2385 PHIP     |
| ENSACAG00000001676 | 2386 R3HDM1   |
| ENSACAG00000029358 | 2387          |
| ENSACAG00000007065 | 2388 EFCAB14  |
| ENSACAG00000002606 | 2389 USP34    |
| ENSACAG00000015271 | 2390 RC3H1    |
| ENSACAG00000017542 | 2391 FOXK1    |
| ENSACAG00000000359 | 2392          |

|                    |                   |
|--------------------|-------------------|
| ENSACAG00000026262 | 2393              |
| ENSACAG00000002268 | 2394 MAML3        |
| ENSACAG00000003232 | 2395 TBK1         |
| ENSACAG00000013738 | 2396 TMEM57       |
| ENSACAG00000003039 | 2397              |
| ENSACAG00000016205 | 2398 HIF1A        |
| ENSACAG00000013266 | 2399 PHF14        |
| ENSACAG00000013838 | 2400 HEATR3       |
| ENSACAG00000022381 | 2401 MRPL9        |
| ENSACAG00000007129 | 2402 SMIM4        |
| ENSACAG00000008923 | 2403 SHISA5       |
| ENSACAG00000000607 | 2404 GOLGA7       |
| ENSACAG00000012444 | 2405 SLIT1        |
| ENSACAG00000001639 | 2406 AGRN         |
| ENSACAG00000014008 | 2407 SCAF1        |
| ENSACAG00000004146 | 2408 SREBF2       |
| ENSACAG00000011483 | 2409 BCL7A        |
| ENSACAG00000014863 | 2410 PIP5K1A      |
| ENSACAG00000007146 | 2411 PPIP5K2      |
| ENSACAG00000011890 | 2412 FGF2         |
| ENSACAG00000006353 | 2413 ATF3         |
| ENSACAG00000016640 | 2414 CHPT1        |
| ENSACAG00000007735 | 2415              |
| ENSACAG00000007808 | 2416 MAN1A2       |
| ENSACAG00000001787 | 2417 HDDC2        |
| ENSACAG00000014932 | 2418 NCOA4        |
| ENSACAG00000017368 | 2419 TTK          |
| ENSACAG00000013777 | 2420 POGLUT1      |
| ENSACAG00000008914 | 2421 USO1         |
| ENSACAG00000002650 | 2422              |
| ENSACAG00000002035 | 2423 UCHL3        |
| ENSACAG00000016324 | 2424 MYO1D        |
| ENSACAG00000014977 | 2425 PPP4C        |
| ENSACAG00000010058 | 2426 STUB1        |
| ENSACAG00000011896 | 2427 CHUK         |
| ENSACAG00000002768 | 2428 MSL1         |
| ENSACAG00000029116 | 2429 MBNL1        |
| ENSACAG00000020099 | 2430 snosnR60_Z15 |
| ENSACAG00000009091 | 2431              |
| ENSACAG00000001266 | 2432 ATP6V1B2     |
| ENSACAG00000028230 | 2433 ATP8         |
| ENSACAG00000017164 | 2434 C15orf39     |

|                    |               |
|--------------------|---------------|
| ENSACAG00000011283 | 2435 FAM129B  |
| ENSACAG00000021104 | 2436 RIT1     |
| ENSACAG00000017970 | 2437 MLLT6    |
| ENSACAG00000001157 | 2438 SPC25    |
| ENSACAG00000013001 | 2439 CCNK     |
| ENSACAG00000005450 | 2440          |
| ENSACAG00000004142 | 2441 UHRF2    |
| ENSACAG00000005694 | 2442 RAB2A    |
| ENSACAG00000004964 | 2443          |
| ENSACAG00000006397 | 2444 NOP2     |
| ENSACAG00000015297 | 2445          |
| ENSACAG00000026432 | 2446          |
| ENSACAG00000008249 | 2447 PRPF38A  |
| ENSACAG00000015308 | 2448          |
| ENSACAG00000008138 | 2449          |
| ENSACAG00000002249 | 2450 SETD7    |
| ENSACAG00000010702 | 2451 ZNF131   |
| ENSACAG00000015301 | 2452 MRPL28   |
| ENSACAG00000024339 | 2453 FAM177A1 |
| ENSACAG00000014350 | 2454 EML4     |
| ENSACAG00000010261 | 2455 ATG3     |
| ENSACAG00000017384 | 2456 SNX30    |
| ENSACAG00000014435 | 2457 DERA     |
| ENSACAG00000013405 | 2458 AP2A1    |
| ENSACAG00000012203 | 2459 FAM171A2 |
| ENSACAG00000016035 | 2460 GNAI1    |
| ENSACAG00000029240 | 2461 VSIG10   |
| ENSACAG00000012314 | 2462 MED21    |
| ENSACAG00000005951 | 2463 DUSP5    |
| ENSACAG00000012468 | 2464          |
| ENSACAG00000017380 | 2465 GOLT1B   |
| ENSACAG00000009409 | 2466 PCNT     |
| ENSACAG00000028758 | 2467 NUTF2    |
| ENSACAG00000003019 | 2468 ABHD4    |
| ENSACAG00000008905 | 2469 GCSH     |
| ENSACAG00000016530 | 2470 TLK1     |
| ENSACAG00000001791 | 2471 SORBS2   |
| ENSACAG00000002303 | 2472 RPIA     |
| ENSACAG00000001241 | 2473 SERPINE1 |
| ENSACAG00000013573 | 2474 CASC4    |
| ENSACAG00000017470 | 2475 BLVRA    |
| ENSACAG00000013842 | 2476 BCL9     |

|                    |               |
|--------------------|---------------|
| ENSACAG00000022533 | 2477          |
| ENSACAG00000001606 | 2478 LUC7L    |
| ENSACAG00000013693 | 2479          |
| ENSACAG00000001310 | 2480          |
| ENSACAG00000011264 | 2481 NUP205   |
| ENSACAG00000008169 | 2482 SEMA6A   |
| ENSACAG00000015288 | 2483 POLR2F   |
| ENSACAG00000000424 | 2484 NAA35    |
| ENSACAG00000003793 | 2485 PRR16    |
| ENSACAG00000011541 | 2486 STAG2    |
| ENSACAG00000008488 | 2487 JMJD6    |
| ENSACAG00000014024 | 2488 C16orf52 |
| ENSACAG00000012824 | 2489 LAMTOR5  |
| ENSACAG00000013231 | 2490 EML1     |
| ENSACAG00000007527 | 2491 WWTR1    |
| ENSACAG00000008458 | 2492 POLK     |
| ENSACAG00000017716 | 2493 STX8     |
| ENSACAG00000014013 | 2494 PHF11    |
| ENSACAG00000009286 | 2495 DUSP8    |
| ENSACAG00000004111 | 2496 CCDC47   |
| ENSACAG00000008773 | 2497 PIP4K2A  |
| ENSACAG00000013305 | 2498 FAM172A  |
| ENSACAG00000014784 | 2499 PRPF8    |
| ENSACAG00000014119 | 2500 FYCO1    |
| ENSACAG00000012719 | 2501 FMNL2    |
| ENSACAG00000016511 | 2502 ESD      |
| ENSACAG00000014127 | 2503 CDCA7L   |
| ENSACAG00000014485 | 2504 ZRANB1   |
| ENSACAG00000003673 | 2505 JAK2     |
| ENSACAG00000011851 | 2506 CALD1    |
| ENSACAG00000014637 | 2507 ARID4A   |
| ENSACAG00000003220 | 2508 VIMP     |
| ENSACAG00000029638 | 2509 RALGPS1  |
| ENSACAG00000004133 | 2510 GLI2     |
| ENSACAG00000011409 | 2511 WBSCR22  |
| ENSACAG00000010232 | 2512          |
| ENSACAG00000005282 | 2513 SCAF8    |
| ENSACAG00000009045 | 2514 DNAJB11  |
| ENSACAG00000015945 | 2515 IL11     |
| ENSACAG00000005474 | 2516 SCR3N3   |
| ENSACAG00000012783 | 2517          |
| ENSACAG00000007980 | 2518          |

|                    |               |
|--------------------|---------------|
| ENSACAG00000011772 | 2519          |
| ENSACAG00000028009 | 2520          |
| ENSACAG00000017038 | 2521 SMARCD1  |
| ENSACAG00000029203 | 2522 SFT2D1   |
| ENSACAG00000006853 | 2523 GSTK1    |
| ENSACAG00000001705 | 2524 SPAG9    |
| ENSACAG00000017298 | 2525 AKAP8    |
| ENSACAG00000010345 | 2526 SMARCC1  |
| ENSACAG00000005456 | 2527 IPCEF1   |
| ENSACAG00000016614 | 2528 RFC5     |
| ENSACAG00000006961 | 2529 BCKDK    |
| ENSACAG00000005675 | 2530 SPATA6   |
| ENSACAG00000029360 | 2531          |
| ENSACAG00000009996 | 2532 GPS1     |
| ENSACAG00000002433 | 2533 RNF2     |
| ENSACAG00000001139 | 2534 PRKD3    |
| ENSACAG00000001142 | 2535 TARBP1   |
| ENSACAG00000028975 | 2536          |
| ENSACAG00000013079 | 2537 NUDT2    |
| ENSACAG00000011888 | 2538 FBXW4    |
| ENSACAG00000009930 | 2539 CCDC186  |
| ENSACAG00000003620 | 2540 PPP4R3B  |
| ENSACAG00000017929 | 2541 ST7L     |
| ENSACAG00000009034 | 2542 IPPK     |
| ENSACAG00000006217 | 2543 CPNE1    |
| ENSACAG00000005318 | 2544 SLC25A17 |
| ENSACAG00000025152 | 2545 SYNGR1   |
| ENSACAG00000008640 | 2546 PFKFB4   |
| ENSACAG00000005017 | 2547 DIRC2    |
| ENSACAG00000010717 | 2548 WBP11    |
| ENSACAG00000001877 | 2549 ZMIZ2    |
| ENSACAG00000004317 | 2550 KIF15    |
| ENSACAG00000012678 | 2551 KIAA0368 |
| ENSACAG00000002649 | 2552 CAB39    |
| ENSACAG00000013952 | 2553 PAPD5    |
| ENSACAG00000004516 | 2554 SOD2     |
| ENSACAG00000009351 | 2555 UTP15    |
| ENSACAG00000009213 | 2556 SWAP70   |
| ENSACAG00000012738 | 2557 NOL10    |
| ENSACAG00000002348 | 2558          |
| ENSACAG00000014911 | 2559 PDZRN3   |
| ENSACAG00000001433 | 2560 C5orf24  |

|                    |               |
|--------------------|---------------|
| ENSACAG00000006330 | 2561 RBM12    |
| ENSACAG00000002340 | 2562 PSMD8    |
| ENSACAG00000002439 | 2563 RCN1     |
| ENSACAG00000000719 | 2564 ELF1     |
| ENSACAG00000008456 | 2565 TYMS     |
| ENSACAG00000003163 | 2566 GTF2A2   |
| ENSACAG00000012702 | 2567 VAMP4    |
| ENSACAG00000001186 | 2568 STXBP6   |
| ENSACAG00000017816 | 2569          |
| ENSACAG00000016263 | 2570 PAK2     |
| ENSACAG00000006417 | 2571 MAP4K3   |
| ENSACAG00000011403 | 2572 SKA2     |
| ENSACAG00000010548 | 2573 LIN54    |
| ENSACAG00000008031 | 2574 DGCR8    |
| ENSACAG00000017673 | 2575 TMEM39A  |
| ENSACAG00000011877 | 2576 ZFAND6   |
| ENSACAG00000011817 | 2577 TWISTNB  |
| ENSACAG00000001234 | 2578 MRPS10   |
| ENSACAG00000003604 | 2579 RANBP9   |
| ENSACAG00000010756 | 2580 DDX39A   |
| ENSACAG00000017306 | 2581 SLC25A39 |
| ENSACAG00000014330 | 2582 AHCYL2   |
| ENSACAG00000001217 | 2583          |
| ENSACAG00000015694 | 2584 KIAA1033 |
| ENSACAG00000004947 | 2585 ABCD3    |
| ENSACAG00000011378 | 2586 ARHGEF40 |
| ENSACAG00000016355 | 2587 SAMD4A   |
| ENSACAG00000011663 | 2588 FKBP1B   |
| ENSACAG00000004102 | 2589 SUFU     |
| ENSACAG00000004657 | 2590 OSBPL2   |
| ENSACAG00000008070 | 2591 GTPBP1   |
| ENSACAG00000015951 | 2592 CSE1L    |
| ENSACAG00000017547 | 2593 GLI3     |
| ENSACAG00000024923 | 2594          |
| ENSACAG00000011208 | 2595          |
| ENSACAG00000017264 | 2596 ST8SIA1  |
| ENSACAG00000007007 | 2597 SAMHD1   |
| ENSACAG00000000973 | 2598 SLC30A6  |
| ENSACAG00000011733 | 2599 VCP      |
| ENSACAG00000014283 | 2600 MED14    |
| ENSACAG00000029274 | 2601 TOMM20   |
| ENSACAG00000014472 | 2602 LAMTOR1  |

|                     |               |
|---------------------|---------------|
| ENSACAG00000001558  | 2603 MBIP     |
| ENSACAG000000017114 | 2604          |
| ENSACAG000000014564 | 2605 ABHD13   |
| ENSACAG000000017544 | 2606          |
| ENSACAG000000011786 | 2607 PAOX     |
| ENSACAG000000012869 | 2608 TUBB4B   |
| ENSACAG000000016485 | 2609 BAK1     |
| ENSACAG000000006237 | 2610 SOS1     |
| ENSACAG000000012000 | 2611 LNPEP    |
| ENSACAG000000001652 | 2612 RSRC2    |
| ENSACAG000000009641 | 2613          |
| ENSACAG000000012420 | 2614 LAMTOR3  |
| ENSACAG000000007788 | 2615 KRR1     |
| ENSACAG000000005682 | 2616 USP5     |
| ENSACAG000000025521 | 2617 EHD2     |
| ENSACAG000000005834 | 2618          |
| ENSACAG000000015852 | 2619 UBR1     |
| ENSACAG000000015765 | 2620 MAST2    |
| ENSACAG000000009217 | 2621 C19orf53 |
| ENSACAG000000002777 | 2622 SLMAP    |
| ENSACAG000000017021 | 2623 SRPK1    |
| ENSACAG000000014067 | 2624 SNX5     |
| ENSACAG000000012881 | 2625 PGRMC1   |
| ENSACAG000000009960 | 2626 RICTOR   |
| ENSACAG000000015634 | 2627 NAV2     |
| ENSACAG000000010508 | 2628          |
| ENSACAG000000003857 | 2629 NTAN1    |
| ENSACAG000000001960 | 2630 CLNS1A   |
| ENSACAG000000012494 | 2631 RNF5     |
| ENSACAG000000014240 | 2632 CMC1     |
| ENSACAG000000009084 | 2633 GLIPR2   |
| ENSACAG000000015324 | 2634 YIPF2    |
| ENSACAG000000006329 | 2635          |
| ENSACAG000000008412 | 2636 GCLC     |
| ENSACAG000000012516 | 2637 POLR3E   |
| ENSACAG000000015097 | 2638 RNLS     |
| ENSACAG000000010472 | 2639 DECR1    |
| ENSACAG000000004808 | 2640 HCCS     |
| ENSACAG000000014755 | 2641 STIM2    |
| ENSACAG000000012985 | 2642 PDIA6    |
| ENSACAG000000000666 | 2643 MEMO1    |
| ENSACAG000000009808 | 2644 XPO5     |

|                    |               |
|--------------------|---------------|
| ENSACAG00000000290 | 2645 SEPT5    |
| ENSACAG00000016911 | 2646 LENG8    |
| ENSACAG00000010753 | 2647 ELP3     |
| ENSACAG00000015830 | 2648          |
| ENSACAG00000006926 | 2649 CTNND1   |
| ENSACAG00000000720 | 2650 BLOC1S2  |
| ENSACAG00000022627 | 2651          |
| ENSACAG00000007075 | 2652 GYG1     |
| ENSACAG00000007403 | 2653 FBXO30   |
| ENSACAG00000002228 | 2654 PPARD    |
| ENSACAG00000021376 | 2655 SNORD44  |
| ENSACAG00000012165 | 2656 MARCKS   |
| ENSACAG00000011931 | 2657          |
| ENSACAG00000013384 | 2658 ARRDC3   |
| ENSACAG00000008065 | 2659 HSBP1    |
| ENSACAG00000015683 | 2660 NUP50    |
| ENSACAG00000009226 | 2661 SMIM19   |
| ENSACAG00000008871 | 2662 SMIM15   |
| ENSACAG00000013594 | 2663 PGR      |
| ENSACAG00000006400 | 2664 RAB28    |
| ENSACAG00000007669 | 2665 TBC1D12  |
| ENSACAG00000003735 | 2666 NDUFAF1  |
| ENSACAG00000016027 | 2667 RTFDC1   |
| ENSACAG00000015256 | 2668 UROD     |
| ENSACAG00000025660 | 2669          |
| ENSACAG00000009119 | 2670 GAN      |
| ENSACAG00000003374 | 2671 GLIS3    |
| ENSACAG00000005651 | 2672 APPL1    |
| ENSACAG00000015010 | 2673 PHRF1    |
| ENSACAG00000003606 | 2674          |
| ENSACAG00000009555 | 2675 MTCH2    |
| ENSACAG00000002569 | 2676 SCAF4    |
| ENSACAG00000002472 | 2677 SLC25A26 |
| ENSACAG00000007694 | 2678 ACOX1    |
| ENSACAG00000008586 | 2679 BRIX1    |
| ENSACAG00000005261 | 2680 IPO9     |
| ENSACAG00000001239 | 2681 NINJ1    |
| ENSACAG00000016128 | 2682 RBM26    |
| ENSACAG00000005967 | 2683          |
| ENSACAG00000003545 | 2684 MAPKAP1  |
| ENSACAG00000000628 | 2685 CUL2     |
| ENSACAG00000009985 | 2686 TATDN1   |



|                    |              |
|--------------------|--------------|
| ENSACAG00000000892 | 2687 UFD1L   |
| ENSACAG00000027391 | 2688 UBE2A   |
| ENSACAG00000010737 | 2689 HMGCS1  |
| ENSACAG00000001339 | 2690 VCPKMT  |
| ENSACAG00000015141 | 2691         |
| ENSACAG00000011176 | 2692 NDUFB2  |
| ENSACAG00000000828 | 2693 WWC3    |
| ENSACAG00000014789 | 2694 RYBP    |
| ENSACAG00000008545 | 2695 DDX24   |
| ENSACAG00000010192 | 2696         |
| ENSACAG00000000609 | 2697         |
| ENSACAG00000003536 | 2698         |
| ENSACAG00000016940 | 2699 HIPK2   |
| ENSACAG00000009741 | 2700         |
| ENSACAG00000016548 | 2701 CNOT6   |
| ENSACAG00000007489 | 2702 PRDX4   |
| ENSACAG00000003434 | 2703 TSR3    |
| ENSACAG00000007227 | 2704         |
| ENSACAG00000014356 | 2705 ATP6V0B |
| ENSACAG00000010310 | 2706 EMC2    |
| ENSACAG00000014181 | 2707 ACER3   |
| ENSACAG00000015856 | 2708         |
| ENSACAG00000003373 | 2709         |
| ENSACAG00000016587 | 2710 GFPT2   |
| ENSACAG00000013771 | 2711 TUBG2   |
| ENSACAG00000003326 | 2712 MACF1   |
| ENSACAG00000004300 | 2713 PPP1R37 |
| ENSACAG00000008779 | 2714 LRP8    |
| ENSACAG00000016601 | 2715 ARID1A  |
| ENSACAG00000014439 | 2716 TAOK2   |
| ENSACAG00000001012 | 2717 HSPA14  |
| ENSACAG00000007206 | 2718 ADSL    |
| ENSACAG00000010103 | 2719 FOSL1   |
| ENSACAG00000007757 | 2720 OXNAD1  |
| ENSACAG00000004820 | 2721 ZC3H7B  |
| ENSACAG00000001144 | 2722         |
| ENSACAG00000013490 | 2723 CLASP2  |
| ENSACAG00000013411 | 2724 CD2AP   |
| ENSACAG00000004522 | 2725 KCNN4   |
| ENSACAG00000016685 | 2726 YLPM1   |
| ENSACAG00000013435 | 2727 MED8    |
| ENSACAG00000015316 | 2728         |

|                    |               |
|--------------------|---------------|
| ENSACAG00000009896 | 2729 GOLGA4   |
| ENSACAG00000002640 | 2730 DYNC1LI2 |
| ENSACAG00000015259 | 2731 EIF2B1   |
| ENSACAG00000003948 | 2732 DNMT1    |
| ENSACAG00000005130 | 2733 DLX3     |
| ENSACAG00000004245 | 2734 ARL3     |
| ENSACAG00000010677 | 2735 ACADL    |
| ENSACAG00000029280 | 2736 SPC24    |
| ENSACAG00000009618 | 2737 ATAD2    |
| ENSACAG00000015128 | 2738          |
| ENSACAG00000008504 | 2739 DIMT1    |
| ENSACAG00000000206 | 2740 HELZ     |
| ENSACAG00000011463 | 2741 STX1A    |
| ENSACAG00000017120 | 2742 KLHL3    |
| ENSACAG00000008440 | 2743 CD99L2   |
| ENSACAG00000015676 | 2744 ARL6IP4  |
| ENSACAG00000003080 | 2745 GTF2E2   |
| ENSACAG00000007213 | 2746 SLC43A1  |
| ENSACAG00000008221 | 2747 POLA1    |
| ENSACAG00000008166 | 2748 COMMD10  |
| ENSACAG00000007168 | 2749 SEC23B   |
| ENSACAG00000015994 | 2750 ARFIP1   |
| ENSACAG00000022050 | 2751 TRAF7    |
| ENSACAG00000013293 | 2752 VPS35    |
| ENSACAG00000001907 | 2753 MPHOSPH8 |
| ENSACAG00000017613 | 2754          |
| ENSACAG00000007681 | 2755 RASSF5   |
| ENSACAG00000013206 | 2756 CLSTN1   |
| ENSACAG00000015480 | 2757 HIST1H4B |
| ENSACAG00000001714 | 2758 SERTAD2  |
| ENSACAG00000010755 | 2759 MRPS18B  |
| ENSACAG00000010471 | 2760 TANC1    |
| ENSACAG00000007070 | 2761 ZDHHC5   |
| ENSACAG00000016991 | 2762          |
| ENSACAG00000026810 | 2763 FIZ1     |
| ENSACAG00000005078 | 2764 COL12A1  |
| ENSACAG00000000564 | 2765 P4HA1    |
| ENSACAG00000001039 | 2766          |
| ENSACAG00000010324 | 2767 PDZD8    |
| ENSACAG00000010746 | 2768          |
| ENSACAG00000014624 | 2769 RAB22A   |
| ENSACAG00000008577 | 2770 MFSD11   |

|                    |                |
|--------------------|----------------|
| ENSACAG00000002029 | 2771 RNPC3     |
| ENSACAG00000004754 | 2772 UXT       |
| ENSACAG00000012237 | 2773 TNFRSF6B  |
| ENSACAG00000010288 | 2774 MTMR14    |
| ENSACAG00000008691 | 2775           |
| ENSACAG00000011401 | 2776           |
| ENSACAG00000028450 | 2777           |
| ENSACAG00000025982 | 2778 POP4      |
| ENSACAG00000013690 | 2779 TMEM50A   |
| ENSACAG00000005975 | 2780 NPEPL1    |
| ENSACAG00000012439 | 2781 DDR2      |
| ENSACAG00000015299 | 2782 BCO2      |
| ENSACAG00000023328 | 2783 ZDHHC14   |
| ENSACAG00000002879 | 2784 FAM160A1  |
| ENSACAG00000005320 | 2785 PPP1R9B   |
| ENSACAG00000002301 | 2786 CLTCL1    |
| ENSACAG00000017979 | 2787 XKR4      |
| ENSACAG00000015620 | 2788 MECOM     |
| ENSACAG00000001744 | 2789 UBE2H     |
| ENSACAG00000013735 | 2790 NUPL2     |
| ENSACAG00000014567 | 2791 SMIM20    |
| ENSACAG00000009612 | 2792 SF3B1     |
| ENSACAG00000000547 | 2793 TRABD2A   |
| ENSACAG00000000902 | 2794 LPAR4     |
| ENSACAG00000016411 | 2795 TNFSF10   |
| ENSACAG00000005691 | 2796 UQCC1     |
| ENSACAG00000005123 | 2797 EPN3      |
| ENSACAG00000019621 | 2798 snoU2-30  |
| ENSACAG00000009271 | 2799 MTBP      |
| ENSACAG00000001167 | 2800 TXNIP     |
| ENSACAG00000012897 | 2801 PRPF40A   |
| ENSACAG00000014423 | 2802 FAM175B   |
| ENSACAG00000003962 | 2803 RBM24     |
| ENSACAG00000008920 | 2804 AKAP1     |
| ENSACAG00000001756 | 2805 ATP2C1    |
| ENSACAG00000006088 | 2806 CLCC1     |
| ENSACAG00000007265 | 2807 C14orf119 |
| ENSACAG00000005973 | 2808 FAM219A   |
| ENSACAG00000008884 | 2809 LIPA      |
| ENSACAG00000017797 | 2810 PRPF19    |
| ENSACAG00000010293 | 2811 USF2      |
| ENSACAG00000007430 | 2812 AP3B1     |

|                    |               |
|--------------------|---------------|
| ENSACAG00000015507 | 2813 CHMP6    |
| ENSACAG00000014512 | 2814 SRP14    |
| ENSACAG00000003103 | 2815 WDR5     |
| ENSACAG00000012966 | 2816 MOB1B    |
| ENSACAG00000012863 | 2817 SLC25A43 |
| ENSACAG00000003045 | 2818 SACS     |
| ENSACAG00000008740 | 2819 SGPL1    |
| ENSACAG00000014667 | 2820 SERPINF1 |
| ENSACAG00000002297 | 2821 ZMYND11  |
| ENSACAG00000007076 | 2822 KDM3B    |
| ENSACAG00000001569 | 2823 RBM23    |
| ENSACAG00000009324 | 2824 TRIP13   |
| ENSACAG00000004345 | 2825 COPS3    |
| ENSACAG00000000409 | 2826 BCAM     |
| ENSACAG00000000590 | 2827 SSR1     |
| ENSACAG00000007833 | 2828 USP1     |
| ENSACAG00000006462 | 2829          |
| ENSACAG00000017281 | 2830 LSM2     |
| ENSACAG00000017026 | 2831 PPIL3    |
| ENSACAG00000011373 | 2832 AGK      |
| ENSACAG00000006271 | 2833          |
| ENSACAG00000017002 | 2834 UBE2J2   |
| ENSACAG00000013164 | 2835 PIP4K2B  |
| ENSACAG00000007552 | 2836 REEP5    |
| ENSACAG00000001721 | 2837 C9orf64  |
| ENSACAG00000009071 | 2838 AGPAT5   |
| ENSACAG00000000501 | 2839 NRBP1    |
| ENSACAG00000016174 | 2840 MBOAT7   |
| ENSACAG00000012392 | 2841 KAT6A    |
| ENSACAG00000025182 | 2842 MTMR1    |
| ENSACAG00000004085 | 2843 AMBRA1   |
| ENSACAG00000028344 | 2844 NUDT3    |
| ENSACAG00000016984 | 2845 CNP      |
| ENSACAG00000005348 | 2846 MKL1     |
| ENSACAG00000009245 | 2847 CPSF2    |
| ENSACAG00000004327 | 2848 PDS5B    |
| ENSACAG00000009125 | 2849 RAB1B    |
| ENSACAG00000005727 | 2850 B3GNT2   |
| ENSACAG00000000353 | 2851          |
| ENSACAG00000007114 | 2852 STXBP5   |
| ENSACAG00000002763 | 2853 TSSC4    |
| ENSACAG00000011590 | 2854 REPS2    |

|                    |                |
|--------------------|----------------|
| ENSACAG00000009088 | 2855 PDE4D     |
| ENSACAG00000012597 | 2856           |
| ENSACAG00000011190 | 2857           |
| ENSACAG00000000915 | 2858 NFIL3     |
| ENSACAG00000015933 | 2859 TPCN2     |
| ENSACAG00000004308 | 2860 FAM114A2  |
| ENSACAG00000012414 | 2861 COPB1     |
| ENSACAG00000010833 | 2862 EIF4E2    |
| ENSACAG00000007692 | 2863 VPRBP     |
| ENSACAG00000002083 | 2864 MEIS1     |
| ENSACAG00000012704 | 2865 METTL9    |
| ENSACAG00000010595 | 2866 CD2BP2    |
| ENSACAG00000016847 | 2867 PPP1R12C  |
| ENSACAG00000004543 | 2868 TSTD2     |
| ENSACAG00000007566 | 2869 NUP93     |
| ENSACAG00000015889 | 2870 SAMM50    |
| ENSACAG00000010728 | 2871 HACD2     |
| ENSACAG00000012716 | 2872 UHRF1BP1L |
| ENSACAG00000008868 | 2873           |
| ENSACAG00000009756 | 2874 CSRNP1    |
| ENSACAG00000017549 | 2875           |
| ENSACAG00000004074 | 2876 TP53INP1  |
| ENSACAG00000002090 | 2877 KIAA0232  |
| ENSACAG00000001052 | 2878 SPTLC1    |
| ENSACAG00000008879 | 2879 NDUFAF2   |
| ENSACAG00000002493 | 2880 DIP2C     |
| ENSACAG00000003973 | 2881           |
| ENSACAG00000011178 | 2882 BRAF      |
| ENSACAG00000004718 | 2883 MVB12A    |
| ENSACAG00000017156 | 2884 DIP2B     |
| ENSACAG00000010099 | 2885 MAD2L1BP  |
| ENSACAG00000010113 | 2886 GM2A      |
| ENSACAG00000003996 | 2887 VRK2      |
| ENSACAG00000015473 | 2888 SPSB4     |
| ENSACAG00000010579 | 2889 STX7      |
| ENSACAG00000015708 | 2890           |
| ENSACAG00000010031 | 2891 GAR1      |
| ENSACAG00000011313 | 2892           |
| ENSACAG00000016756 | 2893 CLK4      |
| ENSACAG00000014687 | 2894 OGT       |
| ENSACAG00000008976 | 2895 ABCF3     |
| ENSACAG00000012519 | 2896 MECP2     |

|                    |               |
|--------------------|---------------|
| ENSACAG00000014695 | 2897 RFWD2    |
| ENSACAG00000012454 | 2898 CACNB4   |
| ENSACAG00000017963 | 2899 RB1CC1   |
| ENSACAG00000001530 | 2900 LEKR1    |
| ENSACAG00000016426 | 2901 GXYLT1   |
| ENSACAG00000005451 | 2902 WRB      |
| ENSACAG00000000866 | 2903 FAM65A   |
| ENSACAG00000008262 | 2904 ERGIC2   |
| ENSACAG00000011153 | 2905 TMEM167A |
| ENSACAG00000014508 | 2906 RRAGD    |
| ENSACAG00000006382 | 2907 MRPL48   |
| ENSACAG00000014206 | 2908          |
| ENSACAG00000017802 | 2909 ZBED8    |
| ENSACAG00000014188 | 2910 GLRX5    |
| ENSACAG00000011585 | 2911 THOC2    |
| ENSACAG00000017947 | 2912 LRIG2    |
| ENSACAG00000002460 | 2913 FAM129A  |
| ENSACAG00000010228 | 2914 EXTL3    |
| ENSACAG00000014975 | 2915 ANKFY1   |
| ENSACAG00000027513 | 2916 PTAR1    |
| ENSACAG00000028234 | 2917 ND3      |
| ENSACAG00000013137 | 2918 BCL10    |
| ENSACAG00000016770 | 2919 MTFR1    |
| ENSACAG00000000695 | 2920 RIOK1    |
| ENSACAG00000004817 | 2921 DYNLT1   |
| ENSACAG00000007974 | 2922 SUB1     |
| ENSACAG00000026971 | 2923          |
| ENSACAG00000011813 | 2924 ZCCHC2   |
| ENSACAG00000002853 | 2925 SPRTN    |
| ENSACAG00000011364 | 2926          |
| ENSACAG00000013021 | 2927 ZC3H14   |
| ENSACAG00000004667 | 2928 GNB4     |
| ENSACAG00000010776 | 2929 SORT1    |
| ENSACAG00000013530 | 2930          |
| ENSACAG00000022369 | 2931          |
| ENSACAG00000012870 | 2932 RUFY3    |
| ENSACAG00000011137 | 2933 INF2     |
| ENSACAG00000001865 | 2934 NCOA7    |
| ENSACAG00000008240 | 2935 ARF3     |
| ENSACAG00000004618 | 2936 LSM12    |
| ENSACAG00000013948 | 2937          |
| ENSACAG00000016023 | 2938 NFYB     |

|                    |               |
|--------------------|---------------|
| ENSACAG00000005362 | 2939 DET1     |
| ENSACAG00000008318 | 2940 UBE2O    |
| ENSACAG00000009164 | 2941 NADK2    |
| ENSACAG00000002048 | 2942 GRPEL1   |
| ENSACAG00000010968 | 2943 HIF1AN   |
| ENSACAG00000012317 | 2944 LDB1     |
| ENSACAG00000006965 | 2945 MAN2A1   |
| ENSACAG00000009269 | 2946 ETS2     |
| ENSACAG00000015408 | 2947 MRPL24   |
| ENSACAG00000010885 | 2948 TKT      |
| ENSACAG00000011700 | 2949 NDRG1    |
| ENSACAG00000008930 | 2950 AP3M1    |
| ENSACAG00000002877 | 2951 SRSF9    |
| ENSACAG00000001901 | 2952 RSF1     |
| ENSACAG00000006191 | 2953 ZDHHC2   |
| ENSACAG00000011671 | 2954 UTP20    |
| ENSACAG00000029677 | 2955 FARS2    |
| ENSACAG00000006489 | 2956 NAPEPLD  |
| ENSACAG00000006159 | 2957 DPYSL2   |
| ENSACAG00000017081 | 2958 C11orf30 |
| ENSACAG00000003451 | 2959 SNX2     |
| ENSACAG00000005014 | 2960          |
| ENSACAG00000016583 | 2961 KCTD20   |
| ENSACAG00000012381 | 2962 BAG6     |
| ENSACAG00000003090 | 2963 NRAS     |
| ENSACAG00000006042 | 2964 ACAT1    |
| ENSACAG00000028890 | 2965 SERGEF   |
| ENSACAG00000015081 | 2966 COG5     |
| ENSACAG00000000886 | 2967 BCCIP    |
| ENSACAG00000016319 | 2968 NEK2     |
| ENSACAG00000017006 | 2969 SLC22A31 |
| ENSACAG00000004866 | 2970 STX6     |
| ENSACAG00000014654 | 2971 DCTN4    |
| ENSACAG00000011180 | 2972          |
| ENSACAG00000012959 | 2973 IPO8     |
| ENSACAG00000004725 | 2974          |
| ENSACAG00000013801 | 2975 CPT1A    |
| ENSACAG00000015825 | 2976 PHC3     |
| ENSACAG00000006739 | 2977 RALGAPB  |
| ENSACAG00000016988 | 2978 METTL5   |
| ENSACAG00000029334 | 2979          |
| ENSACAG00000007569 | 2980 RNF13    |

|                    |               |
|--------------------|---------------|
| ENSACAG00000013799 | 2981 YIPF5    |
| ENSACAG00000005402 | 2982 WIPF1    |
| ENSACAG00000015178 | 2983 TESK2    |
| ENSACAG00000006976 | 2984 CDKN2AIP |
| ENSACAG00000012475 | 2985 IRAK1    |
| ENSACAG00000007031 | 2986 TMEM168  |
| ENSACAG00000013062 | 2987 ETV1     |
| ENSACAG00000001581 | 2988 USP16    |
| ENSACAG00000013736 | 2989 BTBD1    |
| ENSACAG00000006905 | 2990 DHX36    |
| ENSACAG00000014837 | 2991 AKIRIN2  |
| ENSACAG00000008199 | 2992 ORC1     |
| ENSACAG00000000253 | 2993 NOL11    |
| ENSACAG00000012394 | 2994 MAP6     |
| ENSACAG00000005560 | 2995 YTHDF1   |
| ENSACAG00000000175 | 2996 C18orf8  |
| ENSACAG00000005449 | 2997 GPR155   |
| ENSACAG00000005389 | 2998 ACP1     |
| ENSACAG00000025090 | 2999          |
| ENSACAG00000004087 | 3000 AGFG1    |
| ENSACAG00000015800 | 3001 MTHFD1   |
| ENSACAG00000017889 | 3002 JUP      |
| ENSACAG00000000188 | 3003 PCID2    |
| ENSACAG00000006256 | 3004 CNOT7    |
| ENSACAG00000002103 | 3005          |
| ENSACAG00000022336 | 3006          |
| ENSACAG00000009107 | 3007 SKP2     |
| ENSACAG00000011361 | 3008 MAPK8    |
| ENSACAG00000007343 | 3009 MRPL45   |
| ENSACAG00000003044 | 3010 TMX4     |
| ENSACAG00000008184 | 3011          |
| ENSACAG00000009586 | 3012 PPP4R3A  |
| ENSACAG00000002690 | 3013 SPATS2   |
| ENSACAG00000015406 | 3014 RILPL1   |
| ENSACAG00000026452 | 3015          |
| ENSACAG00000012299 | 3016 ERAP1    |
| ENSACAG00000007451 | 3017 RTN2     |
| ENSACAG00000007514 | 3018 POLR2C   |
| ENSACAG00000004989 | 3019 SENP6    |
| ENSACAG00000002278 | 3020 SNAP29   |
| ENSACAG00000008650 | 3021 CDC37    |
| ENSACAG00000001609 | 3022 PERM1    |



|                    |               |
|--------------------|---------------|
| ENSACAG00000008110 | 3023 ABI1     |
| ENSACAG00000006044 | 3024 ICT1     |
| ENSACAG00000017496 | 3025 TBCD     |
| ENSACAG00000004693 | 3026 DONSON   |
| ENSACAG00000004463 | 3027 SMAD9    |
| ENSACAG00000017087 | 3028          |
| ENSACAG00000006509 | 3029 TMEM8C   |
| ENSACAG00000010008 | 3030 PPP3CB   |
| ENSACAG00000002181 | 3031 TAF1A    |
| ENSACAG00000028693 | 3032          |
| ENSACAG00000005069 | 3033 CDK16    |
| ENSACAG00000016363 | 3034 SLC30A5  |
| ENSACAG00000012106 | 3035 GFER     |
| ENSACAG00000011161 | 3036 TRPS1    |
| ENSACAG00000000421 | 3037          |
| ENSACAG00000001981 | 3038 MMS19    |
| ENSACAG00000008286 | 3039 PITRM1   |
| ENSACAG00000007299 | 3040 DOCK1    |
| ENSACAG00000005210 | 3041          |
| ENSACAG00000008276 | 3042 NSFL1C   |
| ENSACAG00000017999 | 3043 WHSC1L1  |
| ENSACAG00000015854 | 3044 GTPBP10  |
| ENSACAG00000009468 | 3045 FNBP4    |
| ENSACAG00000008749 | 3046 SLC25A14 |
| ENSACAG00000017579 | 3047 MYH10    |
| ENSACAG00000009565 | 3048 POU2F1   |
| ENSACAG00000014005 | 3049 TXNRD3   |
| ENSACAG00000012626 | 3050 NUP54    |
| ENSACAG00000007281 | 3051 TNRC6B   |
| ENSACAG00000003282 | 3052 PWWP2A   |
| ENSACAG00000023566 | 3053          |
| ENSACAG00000002242 | 3054 RAPSN    |
| ENSACAG00000009328 | 3055 PLXDC2   |
| ENSACAG00000029623 | 3056 RPL7L1   |
| ENSACAG00000011619 | 3057          |
| ENSACAG00000001806 | 3058 MAPK11   |
| ENSACAG00000009504 | 3059 SUZ12    |
| ENSACAG00000000472 | 3060 FAS      |
| ENSACAG00000010265 | 3061 MEX3C    |
| ENSACAG00000010072 | 3062 MAP2K5   |
| ENSACAG00000007251 | 3063 AMFR     |
| ENSACAG00000014287 | 3064          |

|                    |               |
|--------------------|---------------|
| ENSACAG00000010044 | 3065 CYP27C1  |
| ENSACAG00000008187 | 3066          |
| ENSACAG00000014187 | 3067 ABHD12   |
| ENSACAG00000006857 | 3068          |
| ENSACAG00000004197 | 3069 MFF      |
| ENSACAG00000016543 | 3070 LHFP     |
| ENSACAG00000017415 | 3071 SESTD1   |
| ENSACAG00000007827 | 3072 NELFA    |
| ENSACAG00000004260 | 3073 TAOK3    |
| ENSACAG00000017861 | 3074          |
| ENSACAG00000013219 | 3075 CDK4     |
| ENSACAG00000009021 | 3076 CDC123   |
| ENSACAG00000007355 | 3077 STAG1    |
| ENSACAG00000008607 | 3078 BIRC6    |
| ENSACAG00000005502 | 3079 DGKA     |
| ENSACAG00000007410 | 3080 RNF11    |
| ENSACAG00000001389 | 3081 CDC42SE2 |
| ENSACAG00000015092 | 3082 AP4S1    |
| ENSACAG00000006220 | 3083 GPHN     |
| ENSACAG00000017497 | 3084          |
| ENSACAG00000002482 | 3085 LRIG1    |
| ENSACAG00000007752 | 3086 DPH3     |
| ENSACAG00000007762 | 3087 TNKS2    |
| ENSACAG00000007677 | 3088          |
| ENSACAG00000002115 | 3089 TTC13    |
| ENSACAG00000004419 | 3090 BTBD10   |
| ENSACAG00000016589 | 3091 LDLR     |
| ENSACAG00000000469 | 3092 SNRNP40  |
| ENSACAG00000002189 | 3093          |
| ENSACAG00000027050 | 3094 UBR3     |
| ENSACAG00000029133 | 3095          |
| ENSACAG00000001224 | 3096 PPIL2    |
| ENSACAG00000005781 | 3097 TTL      |
| ENSACAG00000006070 | 3098 ADD3     |
| ENSACAG00000000788 | 3099 UQCRC1   |
| ENSACAG00000009477 | 3100 ADAM23   |
| ENSACAG00000006001 | 3101 AGA      |
| ENSACAG00000000889 | 3102 MED27    |
| ENSACAG00000001566 | 3103 IARS2    |
| ENSACAG00000012138 | 3104 DCAF10   |
| ENSACAG00000014307 | 3105 MGA      |
| ENSACAG00000007421 | 3106 LCLAT1   |

|                    |               |
|--------------------|---------------|
| ENSACAG00000016713 | 3107 BIRC5    |
| ENSACAG00000007631 | 3108 ORAI3    |
| ENSACAG00000006779 | 3109 GNP NAT1 |
| ENSACAG00000006490 | 3110 ATP11A   |
| ENSACAG00000009855 | 3111 MAP1B    |
| ENSACAG00000003640 | 3112 RCL1     |
| ENSACAG00000014737 | 3113 NUBP1    |
| ENSACAG00000000269 | 3114 BPTF     |
| ENSACAG00000001954 | 3115 CTDSP1   |
| ENSACAG00000008038 | 3116          |
| ENSACAG00000006877 | 3117          |
| ENSACAG00000015751 | 3118 SEC23A   |
| ENSACAG00000007308 | 3119 FAF1     |
| ENSACAG00000006448 | 3120 ALPK3    |
| ENSACAG00000003823 | 3121 STARD3   |
| ENSACAG00000014446 | 3122 RNF169   |
| ENSACAG00000011827 | 3123 RGMB     |
| ENSACAG00000010224 | 3124 ATG7     |
| ENSACAG00000014303 | 3125 GLO1     |
| ENSACAG00000003987 | 3126 NUP107   |
| ENSACAG00000002691 | 3127 LATS2    |
| ENSACAG00000006281 | 3128 VPS37A   |
| ENSACAG00000012658 | 3129 PDE3B    |
| ENSACAG00000025985 | 3130 DDR1     |
| ENSACAG00000013198 | 3131          |
| ENSACAG00000012773 | 3132 SLC37A3  |
| ENSACAG00000010720 | 3133 SFT2D2   |
| ENSACAG00000010415 | 3134 ASAP1    |
| ENSACAG00000008566 | 3135 TMEM170B |
| ENSACAG00000011535 | 3136 ZNRD1    |
| ENSACAG00000016639 | 3137 MRPS31   |
| ENSACAG00000015354 | 3138          |
| ENSACAG00000012679 | 3139 CHAF1B   |
| ENSACAG00000013833 | 3140          |
| ENSACAG00000003240 | 3141 IQGAP1   |
| ENSACAG00000012338 | 3142 SORBS1   |
| ENSACAG00000013394 | 3143 TNFRSF21 |
| ENSACAG00000012034 | 3144 PIGT     |
| ENSACAG00000014578 | 3145 RBPJ     |
| ENSACAG00000008867 | 3146 AIFM1    |
| ENSACAG00000014989 | 3147 SMG7     |
| ENSACAG00000011977 | 3148          |

|                     |               |
|---------------------|---------------|
| ENSACAG00000005077  | 3149 WFS1     |
| ENSACAG00000005140  | 3150 RASA2    |
| ENSACAG00000002405  | 3151 GNPAT    |
| ENSACAG000000015716 | 3152 FBXW11   |
| ENSACAG00000008348  | 3153 TMEM184B |
| ENSACAG000000011410 | 3154 PRR14    |
| ENSACAG000000015287 | 3155 UBA3     |
| ENSACAG000000014839 | 3156          |
| ENSACAG000000012577 | 3157 BHLHE40  |
| ENSACAG000000001852 | 3158 SLC39A6  |
| ENSACAG000000013234 | 3159 PCGF2    |
| ENSACAG000000006578 | 3160          |
| ENSACAG000000002587 | 3161 SPTSSA   |
| ENSACAG000000005437 | 3162 PRKG1    |
| ENSACAG000000016827 | 3163 COL21A1  |
| ENSACAG000000012594 | 3164 IKBKG    |
| ENSACAG000000007458 | 3165 ANKRD27  |
| ENSACAG000000011520 | 3166 HMG20A   |
| ENSACAG000000021861 | 3167 SNORD47  |
| ENSACAG000000008969 | 3168 NSA2     |
| ENSACAG000000017643 | 3169 DENND4C  |
| ENSACAG000000005998 | 3170 CDR2L    |
| ENSACAG000000017665 | 3171 EPDR1    |
| ENSACAG000000007625 | 3172 GJA1     |
| ENSACAG000000015415 | 3173 UBTD2    |
| ENSACAG000000002267 | 3174 MBOAT2   |
| ENSACAG000000013867 | 3175 APMAP    |
| ENSACAG000000016480 | 3176 HIATL1   |
| ENSACAG000000005448 | 3177          |
| ENSACAG000000013810 | 3178 LRRC40   |
| ENSACAG000000008082 | 3179 BTF3L4   |
| ENSACAG000000015204 | 3180 ATP6V0A2 |
| ENSACAG000000001832 | 3181 DNAJC3   |
| ENSACAG000000008951 | 3182 NDC1     |
| ENSACAG000000003385 | 3183 AGO3     |
| ENSACAG000000001883 | 3184 SLX4IP   |
| ENSACAG000000002987 | 3185 TPP2     |
| ENSACAG000000004057 | 3186 HDAC1    |
| ENSACAG000000000777 | 3187 SHROOM2  |
| ENSACAG000000000070 | 3188 OSBPL5   |
| ENSACAG000000027947 | 3189          |
| ENSACAG000000011134 | 3190 NECAP1   |

|                    |               |
|--------------------|---------------|
| ENSACAG00000024387 | 3191          |
| ENSACAG00000016772 | 3192 TEX2     |
| ENSACAG00000014411 | 3193 LRP5     |
| ENSACAG00000005760 | 3194 CHD7     |
| ENSACAG00000000618 | 3195 MZT1     |
| ENSACAG00000002018 | 3196 PPP6C    |
| ENSACAG00000016753 | 3197 JMY      |
| ENSACAG00000001166 | 3198 KLF6     |
| ENSACAG00000003335 | 3199 KCNH2    |
| ENSACAG00000007445 | 3200 IL11RA   |
| ENSACAG00000012495 | 3201 OTUB1    |
| ENSACAG00000020340 | 3202 SNORD26  |
| ENSACAG00000013753 | 3203 ARHGAP42 |
| ENSACAG00000011745 | 3204 TUFT1    |
| ENSACAG00000001292 | 3205 DIEXF    |
| ENSACAG00000002701 | 3206 ATL3     |
| ENSACAG00000009104 | 3207 NUDT5    |
| ENSACAG00000002604 | 3208 EFN2     |
| ENSACAG00000000520 | 3209 RREB1    |
| ENSACAG00000001427 | 3210 TXNDC15  |
| ENSACAG00000003440 | 3211 FAM92A1  |
| ENSACAG00000012434 | 3212 NAA40    |
| ENSACAG00000016602 | 3213          |
| ENSACAG00000013194 | 3214 RAF1     |
| ENSACAG00000003026 | 3215 MED24    |
| ENSACAG00000009278 | 3216 PAN3     |
| ENSACAG00000000309 | 3217 DCUN1D2  |
| ENSACAG00000011829 | 3218 TMX3     |
| ENSACAG00000010445 | 3219 ATF7IP   |
| ENSACAG00000028553 | 3220 C12orf45 |
| ENSACAG00000009669 | 3221 SLC4A1AP |
| ENSACAG00000001099 | 3222          |
| ENSACAG00000001096 | 3223          |
| ENSACAG00000008090 | 3224 REEP4    |
| ENSACAG00000002178 | 3225 IMMP1L   |
| ENSACAG00000000949 | 3226 KLF5     |
| ENSACAG00000005288 | 3227 NOP14    |
| ENSACAG00000015262 | 3228 PDDC1    |
| ENSACAG00000006135 | 3229 ATP5F1   |
| ENSACAG00000000635 | 3230 PKNX2    |
| ENSACAG00000003189 | 3231 C2CD2    |
| ENSACAG00000007221 | 3232 COL5A1   |

|                    |              |
|--------------------|--------------|
| ENSACAG00000023849 | 3233         |
| ENSACAG00000004945 | 3234 SYNJ2   |
| ENSACAG00000017672 | 3235 PLIN2   |
| ENSACAG00000000751 | 3236 NAA30   |
| ENSACAG00000013321 | 3237 UCK2    |
| ENSACAG00000003907 | 3238 EPB41L5 |
| ENSACAG00000017622 | 3239 KCTD3   |
| ENSACAG00000007405 | 3240 KLHL15  |
| ENSACAG00000011169 | 3241 KAZALD1 |
| ENSACAG00000004189 | 3242 ATRN    |
| ENSACAG00000014394 | 3243         |
| ENSACAG00000027119 | 3244         |
| ENSACAG00000016853 | 3245 OGFOD3  |
| ENSACAG00000012403 | 3246         |
| ENSACAG00000024783 | 3247         |
| ENSACAG00000007964 | 3248         |
| ENSACAG00000002617 | 3249 TRIM33  |
| ENSACAG00000013368 | 3250 APRT    |
| ENSACAG00000007912 | 3251 ESCO1   |
| ENSACAG00000009606 | 3252 ATAD5   |
| ENSACAG00000010175 | 3253 UVSSA   |
| ENSACAG00000012576 | 3254 QRICH1  |
| ENSACAG00000003031 | 3255 CDK8    |
| ENSACAG00000017053 | 3256 IFT43   |
| ENSACAG00000009944 | 3257 MAP2K7  |
| ENSACAG00000006548 | 3258 DNAJC2  |
| ENSACAG00000008317 | 3259 TXNDC9  |
| ENSACAG00000003926 | 3260 SMDT1   |
| ENSACAG00000013488 | 3261         |
| ENSACAG00000008857 | 3262 TACC1   |
| ENSACAG00000009732 | 3263 DTX3L   |
| ENSACAG00000009242 | 3264         |
| ENSACAG00000006936 | 3265 PPIL4   |
| ENSACAG00000008693 | 3266 TUSC2   |
| ENSACAG00000005146 | 3267 MCM3    |
| ENSACAG00000010933 | 3268 TMEM128 |
| ENSACAG00000003634 | 3269 TCF20   |
| ENSACAG00000002720 | 3270 BCAS2   |
| ENSACAG00000010299 | 3271 VGLL4   |
| ENSACAG00000017140 | 3272 FKBP10  |
| ENSACAG00000011799 | 3273         |
| ENSACAG00000028622 | 3274 NT5C    |

|                    |                 |
|--------------------|-----------------|
| ENSACAG00000000279 | 3275 ZCCHC6     |
| ENSACAG00000005652 | 3276 TRAPPC1    |
| ENSACAG00000011499 | 3277 TNFRSF1A   |
| ENSACAG00000005827 | 3278 ST6GALNAC5 |
| ENSACAG00000016651 | 3279 FCF1       |
| ENSACAG00000029233 | 3280 PLEKHA4    |
| ENSACAG00000006112 | 3281 KCTD2      |
| ENSACAG00000005906 | 3282 KCMF1      |
| ENSACAG00000000014 | 3283 SGOL1      |
| ENSACAG00000006628 | 3284 DTL        |
| ENSACAG00000004623 | 3285 ATP13A1    |
| ENSACAG00000003166 | 3286 BNIP2      |
| ENSACAG00000017859 | 3287 TRAPPC8    |
| ENSACAG00000008393 | 3288 POC5       |
| ENSACAG00000016520 | 3289 MMP2       |
| ENSACAG00000004381 | 3290 CPSF6      |
| ENSACAG00000012003 | 3291 CHSY1      |
| ENSACAG00000000181 | 3292 PROSC      |
| ENSACAG00000014254 | 3293 PPP6R3     |
| ENSACAG00000008618 | 3294 PIN4       |
| ENSACAG00000023223 | 3295 TANK       |
| ENSACAG00000013557 | 3296 SNRPA      |
| ENSACAG00000011760 | 3297 SPATA5     |
| ENSACAG00000013470 | 3298 TNPO3      |
| ENSACAG00000002599 | 3299            |
| ENSACAG00000017117 | 3300 FKBP5      |
| ENSACAG00000002648 | 3301 RNF150     |
| ENSACAG00000011681 | 3302 FSCN1      |
| ENSACAG00000009974 | 3303 BTG2       |
| ENSACAG00000017974 | 3304 MRPL15     |
| ENSACAG00000028367 | 3305            |
| ENSACAG00000012867 | 3306 BUD31      |
| ENSACAG00000004469 | 3307            |
| ENSACAG00000000876 | 3308 THAP4      |
| ENSACAG00000004632 | 3309 CEPT1      |
| ENSACAG00000013460 | 3310 CRIP2      |
| ENSACAG00000002459 | 3311 DISP1      |
| ENSACAG00000001561 | 3312 EDC4       |
| ENSACAG00000017648 | 3313 EXOSC8     |
| ENSACAG00000028785 | 3314 HELLS      |
| ENSACAG00000005161 | 3315 LYPLA2     |
| ENSACAG00000016228 | 3316 SLC25A12   |

|                    |               |
|--------------------|---------------|
| ENSACAG00000000870 | 3317 NDUFAF5  |
| ENSACAG00000028787 | 3318          |
| ENSACAG00000010229 | 3319          |
| ENSACAG00000008692 | 3320 NUP35    |
| ENSACAG00000014368 | 3321 CCDC167  |
| ENSACAG00000023651 | 3322          |
| ENSACAG00000014331 | 3323 ORMDL1   |
| ENSACAG00000011835 | 3324 NUDT6    |
| ENSACAG00000012301 | 3325 SLC39A10 |
| ENSACAG00000010461 | 3326          |
| ENSACAG00000016791 | 3327 TBC1D22B |
| ENSACAG00000004110 | 3328 HSPB8    |
| ENSACAG00000003437 | 3329 TRIQK    |
| ENSACAG00000009238 | 3330 SLC20A2  |
| ENSACAG00000016978 | 3331 RHBDL2   |
| ENSACAG00000017347 | 3332 BCKDHB   |
| ENSACAG00000014475 | 3333 GBF1     |
| ENSACAG00000014817 | 3334 RTCB     |
| ENSACAG00000000610 | 3335 SP1      |
| ENSACAG00000008342 | 3336          |
| ENSACAG00000002345 | 3337 CFAP97   |
| ENSACAG00000017014 | 3338 GIPC1    |
| ENSACAG00000015949 | 3339 STARD7   |
| ENSACAG00000012302 | 3340 LMTK2    |
| ENSACAG00000000496 | 3341 MRPS34   |
| ENSACAG00000011450 | 3342 MPHOSPH6 |
| ENSACAG00000000263 | 3343 E2F6     |
| ENSACAG00000000340 | 3344 TBPL1    |
| ENSACAG00000007579 | 3345 RFC1     |
| ENSACAG00000016850 | 3346 NEK9     |
| ENSACAG00000015024 | 3347 ADAMTSL2 |
| ENSACAG00000002043 | 3348 NUDCD3   |
| ENSACAG00000013807 | 3349          |
| ENSACAG00000003102 | 3350 DPH5     |
| ENSACAG00000007378 | 3351          |
| ENSACAG00000014811 | 3352 MYOZ3    |
| ENSACAG00000015509 | 3353 POLR2L   |
| ENSACAG00000005418 | 3354 RBM17    |
| ENSACAG00000018217 | 3355 SNORA13  |
| ENSACAG00000001635 | 3356 TMOD3    |
| ENSACAG00000000434 | 3357 SNRNP200 |
| ENSACAG00000013858 | 3358 8-Mar    |



|                    |               |
|--------------------|---------------|
| ENSACAG00000006453 | 3359 CBLB     |
| ENSACAG00000017768 | 3360 COL13A1  |
| ENSACAG00000016701 | 3361 SOCS3    |
| ENSACAG00000016312 | 3362 UBXN7    |
| ENSACAG00000009610 | 3363 FASTKD2  |
| ENSACAG00000000969 | 3364 MBNL2    |
| ENSACAG00000008774 | 3365 TEX10    |
| ENSACAG00000006723 | 3366 C5orf30  |
| ENSACAG00000029687 | 3367          |
| ENSACAG00000004289 | 3368 FAM149B1 |
| ENSACAG00000002889 | 3369 USP38    |
| ENSACAG00000015336 | 3370 MMP19    |
| ENSACAG00000000306 | 3371 ZNF622   |
| ENSACAG00000013315 | 3372          |
| ENSACAG00000012873 | 3373 ELL2     |
| ENSACAG00000003940 | 3374 GSTP1    |
| ENSACAG00000012440 | 3375 RAB29    |
| ENSACAG00000010109 | 3376          |
| ENSACAG00000000974 | 3377 CLPTM1L  |
| ENSACAG00000016677 | 3378 MAPK9    |
| ENSACAG00000015546 | 3379 GDI1     |
| ENSACAG00000028397 | 3380          |
| ENSACAG00000001356 | 3381 ADAM17   |
| ENSACAG00000005728 | 3382 MTF2     |
| ENSACAG00000000484 | 3383 UBA5     |
| ENSACAG00000028660 | 3384          |
| ENSACAG00000007870 | 3385 DOCK7    |
| ENSACAG00000005565 | 3386 XRN2     |
| ENSACAG00000010133 | 3387 CDK2AP2  |
| ENSACAG00000009979 | 3388 RNF139   |
| ENSACAG00000028154 | 3389          |
| ENSACAG00000014679 | 3390 CMTM6    |
| ENSACAG00000017755 | 3391 EIF4G3   |
| ENSACAG00000017061 | 3392 SP3      |
| ENSACAG00000011554 | 3393 PARP3    |
| ENSACAG00000011422 | 3394 WDFY3    |
| ENSACAG00000013456 | 3395 ARHGAP26 |
| ENSACAG00000012977 | 3396 STAU2    |
| ENSACAG00000005046 | 3397 C7orf50  |
| ENSACAG00000005115 | 3398 PPP2R2C  |
| ENSACAG00000003214 | 3399 HN1L     |
| ENSACAG00000015948 | 3400 NXN      |

|                    |               |
|--------------------|---------------|
| ENSACAG00000015107 | 3401          |
| ENSACAG00000009169 | 3402 WDR7     |
| ENSACAG00000012536 | 3403 FZD2     |
| ENSACAG00000005432 | 3404 GALNT7   |
| ENSACAG00000000789 | 3405          |
| ENSACAG00000006395 | 3406 DDX52    |
| ENSACAG00000014597 | 3407 SMCO4    |
| ENSACAG00000004080 | 3408          |
| ENSACAG00000003345 | 3409 EPC2     |
| ENSACAG00000007056 | 3410 GUF1     |
| ENSACAG00000004629 | 3411 LRIF1    |
| ENSACAG00000017663 | 3412 ALG5     |
| ENSACAG00000012715 | 3413 CTDSP2   |
| ENSACAG00000007063 | 3414 PDK3     |
| ENSACAG00000009843 | 3415 OSBPL11  |
| ENSACAG00000011065 | 3416 CMSS1    |
| ENSACAG00000020953 | 3417 TMEM150A |
| ENSACAG00000016926 | 3418 RLF      |
| ENSACAG00000009261 | 3419 BBS9     |
| ENSACAG00000013554 | 3420 SMARCAD1 |
| ENSACAG00000025686 | 3421          |
| ENSACAG00000011675 | 3422 TMTC3    |
| ENSACAG00000008576 | 3423 FBXO9    |
| ENSACAG00000007303 | 3424 UNK      |
| ENSACAG00000026326 | 3425          |
| ENSACAG00000007929 | 3426 SENP2    |
| ENSACAG00000028556 | 3427 CDCA8    |
| ENSACAG00000015161 | 3428 TOE1     |
| ENSACAG00000005567 | 3429 RAD51B   |
| ENSACAG00000015329 | 3430 MICALL1  |
| ENSACAG00000014199 | 3431 EXT2     |
| ENSACAG00000017179 | 3432 ATXN7L3  |
| ENSACAG00000015952 | 3433 SRI      |
| ENSACAG00000010780 | 3434 CHMP4A   |
| ENSACAG00000015055 | 3435 PHLDB2   |
| ENSACAG00000002012 | 3436 LCORL    |
| ENSACAG00000008972 | 3437 PIM3     |
| ENSACAG00000006510 | 3438 LMAN2    |
| ENSACAG00000002335 | 3439 CCNT2    |
| ENSACAG00000003888 | 3440 EPB41    |
| ENSACAG00000001726 | 3441 ZPR1     |
| ENSACAG00000011903 | 3442 TRMT10C  |

|                    |               |
|--------------------|---------------|
| ENSACAG00000002400 | 3443 ACSL1    |
| ENSACAG00000016836 | 3444 ACVR1B   |
| ENSACAG00000008756 | 3445 POLI     |
| ENSACAG00000005316 | 3446 ZADH2    |
| ENSACAG00000012891 | 3447          |
| ENSACAG00000013498 | 3448 DIAPH2   |
| ENSACAG00000001235 | 3449 ENPP1    |
| ENSACAG00000016584 | 3450 NSF      |
| ENSACAG00000003663 | 3451          |
| ENSACAG00000005109 | 3452 ARHGEF10 |
| ENSACAG00000003079 | 3453 BYSL     |
| ENSACAG00000012933 | 3454 FGD6     |
| ENSACAG00000004267 | 3455 TIPIN    |
| ENSACAG00000010427 | 3456 RNF146   |
| ENSACAG00000003657 | 3457 KIAA1522 |
| ENSACAG00000016303 | 3458 WDHD1    |
| ENSACAG00000016327 | 3459 CROT     |
| ENSACAG00000007320 | 3460 UBA7     |
| ENSACAG00000017371 | 3461 CEP128   |
| ENSACAG00000011293 | 3462 FOXJ2    |
| ENSACAG00000002619 | 3463 TNKS     |
| ENSACAG00000011582 | 3464 NSRP1    |
| ENSACAG00000014173 | 3465          |
| ENSACAG00000000937 | 3466 CORO1C   |
| ENSACAG00000012975 | 3467 CYTH3    |
| ENSACAG00000009435 | 3468 FAM98A   |
| ENSACAG00000028262 | 3469          |
| ENSACAG00000015328 | 3470 DHX29    |
| ENSACAG00000000498 | 3471 NUDT13   |
| ENSACAG00000011265 | 3472 UBE2E2   |
| ENSACAG00000009449 | 3473 KBTBD2   |
| ENSACAG00000015679 | 3474 SLC9A8   |
| ENSACAG00000011247 | 3475 CTPS2    |
| ENSACAG00000014738 | 3476 COL5A2   |
| ENSACAG00000005461 | 3477 FNBP1L   |
| ENSACAG00000000202 | 3478 TRAF3    |
| ENSACAG00000008850 | 3479          |
| ENSACAG00000001493 | 3480 UAP1L1   |
| ENSACAG00000003914 | 3481 DDRGK1   |
| ENSACAG00000006893 | 3482 PKMYT1   |
| ENSACAG00000001054 | 3483 CEP350   |
| ENSACAG00000010905 | 3484 PAXIP1   |

|                    |               |
|--------------------|---------------|
| ENSACAG00000016665 | 3485          |
| ENSACAG00000000706 | 3486 FIGN     |
| ENSACAG00000008023 | 3487 FEM1C    |
| ENSACAG00000008882 | 3488          |
| ENSACAG00000009945 | 3489 DUS1L    |
| ENSACAG00000018727 | 3490 SNORD12  |
| ENSACAG00000006259 | 3491 RSBN1L   |
| ENSACAG00000017118 | 3492          |
| ENSACAG00000007721 | 3493          |
| ENSACAG00000012831 | 3494 CCDC109B |
| ENSACAG00000015505 | 3495 RHEBL1   |
| ENSACAG00000016904 | 3496 GRK5     |
| ENSACAG00000000068 | 3497 PTPRJ    |
| ENSACAG00000023760 | 3498 GNA11    |
| ENSACAG00000001508 | 3499 OGDH     |
| ENSACAG00000006202 | 3500 PELI1    |
| ENSACAG00000000945 | 3501 OXA1L    |
| ENSACAG00000009920 | 3502 QTRTD1   |
| ENSACAG00000005584 | 3503 ARFGAP1  |
| ENSACAG00000013294 | 3504 SEH1L    |
| ENSACAG00000006621 | 3505 KIF11    |
| ENSACAG00000006340 | 3506 MTHFD1L  |
| ENSACAG00000011776 | 3507 IMMT     |
| ENSACAG00000014225 | 3508 BTBD9    |
| ENSACAG00000016078 | 3509 TMEM47   |
| ENSACAG00000002506 | 3510          |
| ENSACAG00000003484 | 3511 ACVR2A   |
| ENSACAG00000024177 | 3512          |
| ENSACAG00000010763 | 3513 ZFYVE21  |
| ENSACAG00000013805 | 3514 PGAP1    |
| ENSACAG00000013984 | 3515 LRRCC1   |
| ENSACAG00000016225 | 3516 ENTPD5   |
| ENSACAG00000023072 | 3517          |
| ENSACAG00000012651 | 3518 ACTR6    |
| ENSACAG00000002402 | 3519 ARID2    |
| ENSACAG00000004184 | 3520 LAMB1    |
| ENSACAG00000017887 | 3521 P3H4     |
| ENSACAG00000014223 | 3522          |
| ENSACAG00000002254 | 3523 MIA3     |
| ENSACAG00000007276 | 3524          |
| ENSACAG00000001998 | 3525 POLB     |
| ENSACAG00000017326 | 3526 IBTK     |

|                    |              |
|--------------------|--------------|
| ENSACAG00000009745 | 3527 TOLLIP  |
| ENSACAG00000017623 | 3528 ATP1F1  |
| ENSACAG00000015245 | 3529 MINPP1  |
| ENSACAG00000012744 | 3530 DCAF7   |
| ENSACAG00000014469 | 3531 LARGE   |
| ENSACAG00000021043 | 3532         |
| ENSACAG00000006009 | 3533 MXI1    |
| ENSACAG00000001375 | 3534 BLOC1S4 |
| ENSACAG00000014395 | 3535 DUSP14  |
| ENSACAG00000005785 | 3536 IDH3B   |
| ENSACAG00000015615 | 3537 RNF114  |
| ENSACAG00000008270 | 3538 SPHK1   |
| ENSACAG00000011724 | 3539 SLC1A5  |
| ENSACAG00000017853 | 3540 PDXK    |
| ENSACAG00000013300 | 3541 ARL4D   |
| ENSACAG00000010447 | 3542 PKP4    |
| ENSACAG00000007815 | 3543 MIB1    |
| ENSACAG00000005534 | 3544 ATG5    |
| ENSACAG00000002592 | 3545 ARGLU1  |
| ENSACAG00000010709 | 3546 EIF2B5  |
| ENSACAG00000016662 | 3547 PGS1    |
| ENSACAG00000016454 | 3548 STK24   |
| ENSACAG00000009687 | 3549 YIPF3   |
| ENSACAG00000001995 | 3550 PTPRG   |
| ENSACAG00000012149 | 3551 CCNG2   |
| ENSACAG00000014615 | 3552 CCNG1   |
| ENSACAG00000027460 | 3553         |
| ENSACAG00000012251 | 3554 STRIP1  |
| ENSACAG00000014923 | 3555 PRRG1   |
| ENSACAG00000009060 | 3556 CCNL2   |
| ENSACAG00000007141 | 3557 WDR36   |
| ENSACAG00000015710 | 3558 GPBP1L1 |
| ENSACAG00000015193 | 3559 MMACHC  |
| ENSACAG00000015146 | 3560 ARID3B  |
| ENSACAG00000001496 | 3561 FAM3B   |
| ENSACAG00000006029 | 3562 GPSM2   |
| ENSACAG00000015426 | 3563 DARS2   |
| ENSACAG00000003531 | 3564 INO80   |
| ENSACAG00000001630 | 3565 MED23   |
| ENSACAG00000016724 | 3566 MED13L  |
| ENSACAG00000014487 | 3567 BCOR    |
| ENSACAG00000000383 | 3568 DPY19L3 |

|                    |               |
|--------------------|---------------|
| ENSACAG00000010010 | 3569          |
| ENSACAG00000014247 | 3570 AZI2     |
| ENSACAG00000007680 | 3571 TSC22D2  |
| ENSACAG00000003144 | 3572 SLU7     |
| ENSACAG00000009332 | 3573 ASPM     |
| ENSACAG00000016422 | 3574 C12orf49 |
| ENSACAG00000006266 | 3575 EPHA2    |
| ENSACAG00000000605 | 3576 SUGT1    |
| ENSACAG00000017318 | 3577 WIZ      |
| ENSACAG00000016061 | 3578 PRPF31   |
| ENSACAG00000007640 | 3579 RFC4     |
| ENSACAG00000012496 | 3580          |
| ENSACAG00000000649 | 3581 DIS3     |
| ENSACAG00000010632 | 3582 MOSPD2   |
| ENSACAG00000003528 | 3583 SASS6    |
| ENSACAG00000013260 | 3584          |
| ENSACAG00000011677 | 3585 SF3B6    |
| ENSACAG00000006515 | 3586 IMPAD1   |
| ENSACAG00000017299 | 3587 UGCG     |
| ENSACAG00000015849 | 3588 CLDN12   |
| ENSACAG00000013510 | 3589 CTH      |
| ENSACAG00000015006 | 3590 NCOA2    |
| ENSACAG00000023178 | 3591 GYPC     |
| ENSACAG00000014800 | 3592 GABPA    |
| ENSACAG00000010239 | 3593 RIPK2    |
| ENSACAG00000000713 | 3594 HIBCH    |
| ENSACAG00000014781 | 3595 CCNE1    |
| ENSACAG00000011721 | 3596 PXK      |
| ENSACAG00000008836 | 3597 UNC93B1  |
| ENSACAG00000012722 | 3598          |
| ENSACAG00000005850 | 3599 SH3GL1   |
| ENSACAG00000006932 | 3600 MFSD1    |
| ENSACAG00000028701 | 3601          |
| ENSACAG00000011987 | 3602 DIS3L2   |
| ENSACAG00000003028 | 3603 ACP2     |
| ENSACAG00000014047 | 3604 KNSTRN   |
| ENSACAG00000010057 | 3605 SKA1     |
| ENSACAG00000011747 | 3606 FAH      |
| ENSACAG00000004805 | 3607 MEOX1    |
| ENSACAG00000015967 | 3608 RNF130   |
| ENSACAG00000013962 | 3609 TRAPPC4  |
| ENSACAG00000002409 | 3610 SNX6     |

|                    |               |
|--------------------|---------------|
| ENSACAG00000005880 | 3611 HNRNPLL  |
| ENSACAG00000014985 | 3612 SRGAP3   |
| ENSACAG00000000212 | 3613 CUL4A    |
| ENSACAG00000000756 | 3614 CDC45    |
| ENSACAG00000000160 | 3615 MAGI3    |
| ENSACAG00000016696 | 3616 COLGALT1 |
| ENSACAG00000010662 | 3617 LARP7    |
| ENSACAG00000007863 | 3618          |
| ENSACAG00000005019 | 3619 LMOD1    |
| ENSACAG00000000296 | 3620          |
| ENSACAG00000000956 | 3621 FAM49A   |
| ENSACAG00000028528 | 3622 FLVCR1   |
| ENSACAG00000000466 | 3623 PSME2    |
| ENSACAG00000004691 | 3624 KPNA6    |
| ENSACAG00000007943 | 3625          |
| ENSACAG00000010455 | 3626 SKAP2    |
| ENSACAG00000013364 | 3627 ZC2HC1A  |
| ENSACAG00000009961 | 3628 PLA2G15  |
| ENSACAG00000007208 | 3629 CCDC144A |
| ENSACAG00000001420 | 3630 LYRM7    |
| ENSACAG00000012639 | 3631 RUVBL2   |
| ENSACAG00000010316 | 3632          |
| ENSACAG00000000619 | 3633 NCOA1    |
| ENSACAG00000004050 | 3634 RNPEP    |
| ENSACAG00000012705 | 3635 CYP2R1   |
| ENSACAG00000010440 | 3636 NBN      |
| ENSACAG00000011532 | 3637 LRRC58   |
| ENSACAG00000023420 | 3638          |
| ENSACAG00000010785 | 3639 PPP1R13B |
| ENSACAG00000002270 | 3640 KANK1    |
| ENSACAG00000002420 | 3641 EED      |
| ENSACAG00000016615 | 3642 PORCN    |
| ENSACAG00000014681 | 3643 DMAP1    |
| ENSACAG00000012201 | 3644 ASUN     |
| ENSACAG00000015560 | 3645 LMBR1L   |
| ENSACAG00000007750 | 3646 PDZD2    |
| ENSACAG00000008869 | 3647 TTC27    |
| ENSACAG00000003523 | 3648 LLPH     |
| ENSACAG00000011577 | 3649 SSBP1    |
| ENSACAG00000014812 | 3650 DACT1    |
| ENSACAG00000021951 | 3651          |
| ENSACAG00000016465 | 3652 TIMELESS |

|                    |                |
|--------------------|----------------|
| ENSACAG00000015766 | 3653 VAMP7     |
| ENSACAG00000000038 | 3654           |
| ENSACAG00000017106 | 3655           |
| ENSACAG00000002386 | 3656 KIDINS220 |
| ENSACAG00000002327 | 3657 NOA1      |
| ENSACAG00000008472 | 3658 IPO11     |
| ENSACAG00000007776 | 3659 USP6NL    |
| ENSACAG00000007828 | 3660 ANKLE2    |
| ENSACAG00000001574 | 3661 LRRC16A   |
| ENSACAG00000011094 | 3662 TMEM120B  |
| ENSACAG00000012944 | 3663 SUPT3H    |
| ENSACAG00000028365 | 3664           |
| ENSACAG00000013199 | 3665 PLXNA4    |
| ENSACAG00000017667 | 3666 PPP1R8    |
| ENSACAG00000009064 | 3667           |
| ENSACAG00000020242 | 3668 SNORA73   |
| ENSACAG00000024530 | 3669 HIST1H4A  |
| ENSACAG00000017076 | 3670           |
| ENSACAG00000010559 | 3671 GLG1      |
| ENSACAG00000009159 | 3672 SCN5A     |
| ENSACAG00000000101 | 3673 DCPS      |
| ENSACAG00000006285 | 3674 CLTB      |
| ENSACAG00000005463 | 3675 RAB18     |
| ENSACAG00000012647 | 3676           |
| ENSACAG00000015813 | 3677           |
| ENSACAG00000010157 | 3678 C3orf17   |
| ENSACAG00000008069 | 3679 PRKAG1    |
| ENSACAG00000016742 | 3680           |
| ENSACAG00000005891 | 3681 CMPK1     |
| ENSACAG00000012082 | 3682 NR2C2     |
| ENSACAG00000010136 | 3683           |
| ENSACAG00000004223 | 3684 TMEM50B   |
| ENSACAG00000010019 | 3685 SF3B4     |
| ENSACAG00000015000 | 3686 PARG      |
| ENSACAG00000006476 | 3687 ZNF592    |
| ENSACAG00000006084 | 3688           |
| ENSACAG00000014092 | 3689 PLXND1    |
| ENSACAG00000003993 | 3690 HACE1     |
| ENSACAG00000009771 | 3691 XIRP1     |
| ENSACAG00000006052 | 3692 ACBD3     |
| ENSACAG00000004108 | 3693 TTC14     |
| ENSACAG00000015591 | 3694 CLPP      |



|                    |               |
|--------------------|---------------|
| ENSACAG00000011149 | 3695 TBC1D23  |
| ENSACAG00000014027 | 3696 IRF3     |
| ENSACAG00000016598 | 3697 GPKOW    |
| ENSACAG00000010137 | 3698 DNA2     |
| ENSACAG00000028910 | 3699 KIAA0408 |
| ENSACAG00000003829 | 3700 MRPS12   |
| ENSACAG00000014125 | 3701 USP44    |
| ENSACAG00000008991 | 3702 KEAP1    |
| ENSACAG00000004621 | 3703 CHCHD5   |
| ENSACAG00000010846 | 3704 YTHDF2   |
| ENSACAG00000004017 | 3705 EXOSC4   |
| ENSACAG00000012723 | 3706 RAD50    |
| ENSACAG00000017674 | 3707 STX12    |
| ENSACAG00000013226 | 3708          |
| ENSACAG00000002683 | 3709 ZNF330   |
| ENSACAG00000005434 | 3710 MSRB1    |
| ENSACAG00000002375 | 3711 SARAF    |
| ENSACAG00000006938 | 3712          |
| ENSACAG00000014098 | 3713 E2F5     |
| ENSACAG00000008881 | 3714 TM9SF2   |
| ENSACAG00000005135 | 3715 RNF7     |
| ENSACAG00000004018 | 3716 SLC7A3   |
| ENSACAG00000007224 | 3717 LPCAT3   |
| ENSACAG00000001669 | 3718 TMEM11   |
| ENSACAG00000005884 | 3719 CCDC66   |
| ENSACAG00000017249 | 3720 FKBP7    |
| ENSACAG00000004173 | 3721 MRPL44   |
| ENSACAG00000015782 | 3722 ZBTB1    |
| ENSACAG00000007702 | 3723 SLC35A2  |
| ENSACAG00000011761 | 3724          |
| ENSACAG00000009470 | 3725 FASN     |
| ENSACAG00000005152 | 3726 PITHD1   |
| ENSACAG00000026588 | 3727          |
| ENSACAG00000005847 | 3728          |
| ENSACAG00000016962 | 3729 SCMH1    |
| ENSACAG00000017596 | 3730 MPLKIP   |
| ENSACAG00000001014 | 3731 SRRT     |
| ENSACAG00000003550 | 3732 PCCA     |
| ENSACAG00000029688 | 3733 TRA2B    |
| ENSACAG00000004364 | 3734 TFAM     |
| ENSACAG00000014592 | 3735          |
| ENSACAG00000000931 | 3736 SMC5     |

|                    |               |
|--------------------|---------------|
| ENSACAG00000013179 | 3737 GLCCI1   |
| ENSACAG00000009205 | 3738 FHIT     |
| ENSACAG00000009083 | 3739          |
| ENSACAG00000024858 | 3740          |
| ENSACAG00000004104 | 3741 SLC7A1   |
| ENSACAG00000003733 | 3742 KIAA1429 |
| ENSACAG00000002863 | 3743 ERI1     |
| ENSACAG00000002756 | 3744          |
| ENSACAG00000010271 | 3745 ARHGEF17 |
| ENSACAG00000010179 | 3746 INO80E   |
| ENSACAG00000005557 | 3747 MTRF1L   |
| ENSACAG00000003162 | 3748 PACSIN3  |
| ENSACAG00000001047 | 3749 ADGRA3   |
| ENSACAG00000009552 | 3750 BRE      |
| ENSACAG00000001036 | 3751 HSPA13   |
| ENSACAG00000001745 | 3752 OFD1     |
| ENSACAG00000000060 | 3753 GTF2H1   |
| ENSACAG00000012178 | 3754 MARK2    |
| ENSACAG00000014851 | 3755 PPP4R2   |
| ENSACAG00000017858 | 3756          |
| ENSACAG00000000130 | 3757 DHCR24   |
| ENSACAG00000001489 | 3758 TBCE     |
| ENSACAG00000017202 | 3759 ATF1     |
| ENSACAG00000017779 | 3760 VPS37C   |
| ENSACAG00000003898 | 3761 DYRK2    |
| ENSACAG00000028401 | 3762 VPS25    |
| ENSACAG00000008237 | 3763 TRPC4AP  |
| ENSACAG00000024463 | 3764 KCNMB4   |
| ENSACAG00000001829 | 3765 CPLX1    |
| ENSACAG00000008383 | 3766 RHBDF2   |
| ENSACAG00000003460 | 3767 ANKRD12  |
| ENSACAG00000000388 | 3768 RASSF8   |
| ENSACAG00000007144 | 3769 CREB5    |
| ENSACAG00000001654 | 3770 AFTPH    |
| ENSACAG00000003104 | 3771          |
| ENSACAG00000006189 | 3772 PARP1    |
| ENSACAG00000015241 | 3773 SNX12    |
| ENSACAG00000015817 | 3774 TRIM23   |
| ENSACAG00000017289 | 3775          |
| ENSACAG00000009133 | 3776 ZBED4    |
| ENSACAG00000015647 | 3777 KIAA0930 |
| ENSACAG00000010341 | 3778 THOC6    |

|                    |               |
|--------------------|---------------|
| ENSACAG00000000830 | 3779 MRPS5    |
| ENSACAG00000015244 | 3780 TMF1     |
| ENSACAG00000014015 | 3781 AMOTL1   |
| ENSACAG00000015147 | 3782 PLEKHH2  |
| ENSACAG00000014764 | 3783 CHKA     |
| ENSACAG00000017809 | 3784 PAFAH2   |
| ENSACAG00000006931 | 3785 ITGB7    |
| ENSACAG00000010110 | 3786 BOC      |
| ENSACAG00000004985 | 3787 XRN1     |
| ENSACAG00000006981 | 3788 WWC2     |
| ENSACAG00000006708 | 3789 KAT8     |
| ENSACAG00000006971 | 3790 CASP2    |
| ENSACAG00000012701 | 3791 TRAP1    |
| ENSACAG00000010210 | 3792 KIAA0196 |
| ENSACAG00000004982 | 3793 UGGT1    |
| ENSACAG00000013342 | 3794          |
| ENSACAG00000012332 | 3795 SNAI2    |
| ENSACAG00000005460 | 3796 BRWD1    |
| ENSACAG00000003711 | 3797 PPFIA1   |
| ENSACAG00000014560 | 3798 UBE2J1   |
| ENSACAG00000002850 | 3799          |
| ENSACAG00000008092 | 3800 DLG5     |
| ENSACAG00000010685 | 3801 SKI      |
| ENSACAG00000008995 | 3802 UBR5     |
| ENSACAG00000007818 | 3803 MTMR12   |
| ENSACAG00000010815 | 3804 PDE4B    |
| ENSACAG00000015640 | 3805 ADAR     |
| ENSACAG00000015661 | 3806 HMGXB3   |
| ENSACAG00000003758 | 3807 PDXDC1   |
| ENSACAG00000015506 | 3808 CARD19   |
| ENSACAG00000004251 | 3809 PAK1IP1  |
| ENSACAG00000004310 | 3810 WBP1L    |
| ENSACAG00000000009 | 3811 CLEC16A  |
| ENSACAG00000008746 | 3812 C1orf123 |
| ENSACAG00000009709 | 3813          |
| ENSACAG00000015586 | 3814 MYH14    |
| ENSACAG00000004182 | 3815 SUDS3    |
| ENSACAG00000009046 | 3816 PLAU     |
| ENSACAG00000013941 | 3817 PHKB     |
| ENSACAG00000010750 | 3818          |
| ENSACAG00000016806 | 3819 CKAP2    |
| ENSACAG00000002744 | 3820 PER2     |

|                    |               |
|--------------------|---------------|
| ENSACAG00000027570 | 3821          |
| ENSACAG00000003041 | 3822 HIPK3    |
| ENSACAG00000013705 | 3823 SETSIP   |
| ENSACAG00000009438 | 3824 CWC22    |
| ENSACAG00000009697 | 3825 YTHDC1   |
| ENSACAG00000007363 | 3826          |
| ENSACAG00000009379 | 3827 PIGU     |
| ENSACAG00000005660 | 3828 POLR1B   |
| ENSACAG00000003309 | 3829 GCHFR    |
| ENSACAG00000016481 | 3830 DNAJC18  |
| ENSACAG00000003360 | 3831 RAB12    |
| ENSACAG00000015339 | 3832 KATNBL1  |
| ENSACAG00000011480 | 3833 HDAC11   |
| ENSACAG00000011794 | 3834 RBBP6    |
| ENSACAG00000014716 | 3835 RNGTT    |
| ENSACAG00000011587 | 3836 UBXN2A   |
| ENSACAG00000003140 | 3837 MLEC     |
| ENSACAG00000014782 | 3838 CNOT10   |
| ENSACAG00000017893 | 3839 SERPINI1 |
| ENSACAG00000016248 | 3840 USP36    |
| ENSACAG00000004307 | 3841          |
| ENSACAG00000017423 | 3842 TEAD2    |
| ENSACAG00000003212 | 3843 OTUD6B   |
| ENSACAG00000006743 | 3844 ALAS1    |
| ENSACAG00000011359 | 3845 NEFM     |
| ENSACAG00000006825 | 3846          |
| ENSACAG00000007513 | 3847 MTPAP    |
| ENSACAG00000012777 | 3848 ARPC1A   |
| ENSACAG00000004270 | 3849 SFXN2    |
| ENSACAG00000026425 | 3850          |
| ENSACAG00000001779 | 3851 FAM126B  |
| ENSACAG00000003184 | 3852 NHEJ1    |
| ENSACAG00000011224 | 3853 UBE3C    |
| ENSACAG00000011916 | 3854 ABHD14B  |
| ENSACAG00000013610 | 3855 CASD1    |
| ENSACAG00000012184 | 3856 ARIH2    |
| ENSACAG00000015883 | 3857 RAD54L2  |
| ENSACAG00000002964 | 3858          |
| ENSACAG00000015516 | 3859 ANKIB1   |
| ENSACAG00000013331 | 3860 NBR1     |
| ENSACAG00000012169 | 3861 AGPS     |
| ENSACAG00000001444 | 3862 TMEM243  |

|                     |              |
|---------------------|--------------|
| ENSACAG00000027779  | 3863 PPM1L   |
| ENSACAG00000016794  | 3864 HMGCLL1 |
| ENSACAG00000015255  | 3865 BAHCC1  |
| ENSACAG00000007472  | 3866 ACOT9   |
| ENSACAG00000007593  | 3867 PCCB    |
| ENSACAG00000006366  | 3868 NENF    |
| ENSACAG00000009248  | 3869 COIL    |
| ENSACAG00000001759  | 3870 CPSF3   |
| ENSACAG00000017844  | 3871 TMEM222 |
| ENSACAG00000010226  | 3872 SGK1    |
| ENSACAG00000003157  | 3873 UNC119B |
| ENSACAG00000006841  | 3874 DNAJC5  |
| ENSACAG00000003966  | 3875 PLGRKT  |
| ENSACAG00000001363  | 3876 SERINC1 |
| ENSACAG00000004331  | 3877 TBC1D7  |
| ENSACAG000000011550 | 3878 CD40    |
| ENSACAG00000008101  | 3879 ATG4C   |
| ENSACAG00000006025  | 3880 H2AFV   |
| ENSACAG00000004135  | 3881 CERK    |
| ENSACAG00000017836  | 3882 U2AF1L5 |
| ENSACAG00000001417  | 3883 PKN2    |
| ENSACAG00000014488  | 3884 SLC6A9  |
| ENSACAG00000016212  | 3885 SPDL1   |
| ENSACAG00000002930  | 3886 DENND6A |
| ENSACAG00000004384  | 3887 XPA     |
| ENSACAG00000011192  | 3888 NOM1    |
| ENSACAG00000000778  | 3889 GOT2    |
| ENSACAG00000000734  | 3890 CEP95   |
| ENSACAG00000008637  | 3891         |
| ENSACAG00000000423  | 3892 TFRC    |
| ENSACAG00000007802  | 3893 AP1G1   |
| ENSACAG00000000203  | 3894 PTK2    |
| ENSACAG00000001148  | 3895 CTDP1   |
| ENSACAG00000000805  | 3896 ICE1    |
| ENSACAG00000001173  | 3897 NRIP1   |
| ENSACAG00000014497  | 3898         |
| ENSACAG00000005181  | 3899         |
| ENSACAG00000017082  | 3900 TRAPPC5 |
| ENSACAG00000000128  | 3901 KLF11   |
| ENSACAG00000006504  | 3902 PMPCB   |
| ENSACAG00000025807  | 3903         |
| ENSACAG00000014184  | 3904         |

|                    |               |
|--------------------|---------------|
| ENSACAG00000002805 | 3905 EGLN1    |
| ENSACAG00000028646 | 3906 ID2      |
| ENSACAG00000013857 | 3907 YOD1     |
| ENSACAG00000018260 | 3908 SNORA61  |
| ENSACAG00000013182 | 3909 PRKAB2   |
| ENSACAG00000012199 | 3910 SNX13    |
| ENSACAG00000017821 | 3911 MTFR1L   |
| ENSACAG00000010434 | 3912 SIRT7    |
| ENSACAG00000004508 | 3913 XRCC6    |
| ENSACAG00000005112 | 3914 ARHGAP29 |
| ENSACAG00000001734 | 3915 PRMT5    |
| ENSACAG00000025994 | 3916          |
| ENSACAG00000002817 | 3917 URB1     |
| ENSACAG00000013310 | 3918 MKRN2    |
| ENSACAG00000009338 | 3919 ZNF143   |
| ENSACAG00000014909 | 3920          |
| ENSACAG00000005638 | 3921 RAB24    |
| ENSACAG00000000862 | 3922 MCU      |
| ENSACAG00000012485 | 3923          |
| ENSACAG00000007854 | 3924 GPD2     |
| ENSACAG00000014604 | 3925 LARS2    |
| ENSACAG00000016037 | 3926 PPP2R5E  |
| ENSACAG00000002551 | 3927 UBE2B    |
| ENSACAG00000007406 | 3928 EPM2A    |
| ENSACAG00000005981 | 3929 SENP1    |
| ENSACAG00000012409 | 3930 COPS6    |
| ENSACAG00000006572 | 3931 ADGRL2   |
| ENSACAG00000000853 | 3932 WIPF3    |
| ENSACAG00000003543 | 3933 GNB2     |
| ENSACAG00000029075 | 3934 CD274    |
| ENSACAG00000000448 | 3935 PPM1H    |
| ENSACAG00000015036 | 3936 CAMK2A   |
| ENSACAG00000016193 | 3937 GRWD1    |
| ENSACAG00000011864 | 3938 PHLPP1   |
| ENSACAG00000017410 | 3939 COX11    |
| ENSACAG00000028259 | 3940 BAHD1    |
| ENSACAG00000014643 | 3941          |
| ENSACAG00000015549 | 3942          |
| ENSACAG00000016206 | 3943 MAST4    |
| ENSACAG00000014640 | 3944 SLC35C1  |
| ENSACAG00000009366 | 3945 PLEKHG3  |
| ENSACAG00000002884 | 3946 PIK3CB   |

|                    |               |
|--------------------|---------------|
| ENSACAG00000015947 | 3947 TMEM62   |
| ENSACAG00000005829 | 3948 SEC63    |
| ENSACAG00000000156 | 3949 NAB1     |
| ENSACAG00000016703 | 3950 PPP5C    |
| ENSACAG00000023049 | 3951          |
| ENSACAG00000008968 | 3952 APEH     |
| ENSACAG00000009572 | 3953 FCHO2    |
| ENSACAG00000013221 | 3954 SHCBP1   |
| ENSACAG00000014561 | 3955 POLR2A   |
| ENSACAG00000027401 | 3956 BDP1     |
| ENSACAG00000005988 | 3957          |
| ENSACAG00000009545 | 3958          |
| ENSACAG00000014041 | 3959 KPNA5    |
| ENSACAG00000015333 | 3960 FOXM1    |
| ENSACAG00000006978 | 3961 PAM      |
| ENSACAG00000016140 | 3962 LEMD2    |
| ENSACAG00000002376 | 3963 GCC2     |
| ENSACAG00000006842 | 3964 CHD6     |
| ENSACAG00000011304 | 3965 MPDZ     |
| ENSACAG00000001463 | 3966 GGPS1    |
| ENSACAG00000007585 | 3967 TNKS1BP1 |
| ENSACAG00000002478 | 3968 ST6GAL2  |
| ENSACAG00000011501 | 3969 MYLK4    |
| ENSACAG00000001378 | 3970 CCDC3    |
| ENSACAG00000007092 | 3971 SLC25A46 |
| ENSACAG00000012066 | 3972 SSH2     |
| ENSACAG00000022188 | 3973 CLSPN    |
| ENSACAG00000012546 | 3974          |
| ENSACAG00000006297 | 3975 SNF8     |
| ENSACAG00000003593 | 3976 TNNT2    |
| ENSACAG00000022187 | 3977          |
| ENSACAG00000006275 | 3978 RMND1    |
| ENSACAG00000014697 | 3979 NAMPT    |
| ENSACAG00000010586 | 3980          |
| ENSACAG00000011680 | 3981          |
| ENSACAG00000001582 | 3982 KLHDC10  |
| ENSACAG00000003417 | 3983 ASH1L    |
| ENSACAG00000009803 | 3984 DCUN1D3  |
| ENSACAG00000007267 | 3985 IP6K1    |
| ENSACAG00000004351 | 3986 EVI5     |
| ENSACAG00000022571 | 3987 MPPED2   |
| ENSACAG00000029079 | 3988          |

|                    |                |
|--------------------|----------------|
| ENSACAG00000011531 | 3989 MELK      |
| ENSACAG00000014445 | 3990 MAPKBP1   |
| ENSACAG00000017686 | 3991 CHD1L     |
| ENSACAG00000014496 | 3992 BMF       |
| ENSACAG00000004466 | 3993 LRP6      |
| ENSACAG00000002279 | 3994           |
| ENSACAG00000001216 | 3995 TNFAIP8L3 |
| ENSACAG00000005631 | 3996 CNPY3     |
| ENSACAG00000009175 | 3997           |
| ENSACAG00000010134 | 3998 SLC25A16  |
| ENSACAG00000006033 | 3999 VPS54     |
| ENSACAG00000017363 | 4000           |
| ENSACAG00000013106 | 4001 LINC00116 |
| ENSACAG00000001377 | 4002 GALNT2    |
| ENSACAG00000001118 | 4003 POLG2     |
| ENSACAG00000010642 | 4004           |
| ENSACAG00000006763 | 4005 COMMD8    |
| ENSACAG00000009057 | 4006 CHURC1    |
| ENSACAG00000012986 | 4007 ZFAND2B   |
| ENSACAG00000009483 | 4008 ZDHHC6    |
| ENSACAG00000024302 | 4009           |
| ENSACAG00000023890 | 4010 HAUS5     |
| ENSACAG00000008201 | 4011           |
| ENSACAG00000013438 | 4012 ORC6      |
| ENSACAG00000015746 | 4013 RBM20     |
| ENSACAG00000006063 | 4014 ZNF652    |
| ENSACAG00000009434 | 4015 ANKRA2    |
| ENSACAG00000011354 | 4016 SLC16A10  |
| ENSACAG00000008154 | 4017 ST7       |
| ENSACAG00000017617 | 4018 VPS41     |
| ENSACAG00000016176 | 4019 PSEN1     |
| ENSACAG00000004531 | 4020 DENND4A   |
| ENSACAG00000012689 | 4021 EXOSC9    |
| ENSACAG00000010193 | 4022 RUFY2     |
| ENSACAG00000001323 | 4023 RBFA      |
| ENSACAG00000003618 | 4024 ZNF827    |
| ENSACAG00000029692 | 4025           |
| ENSACAG00000001799 | 4026 ZNF521    |
| ENSACAG00000008288 | 4027 GDAP2     |
| ENSACAG00000016761 | 4028 FAM46B    |
| ENSACAG00000004422 | 4029 ANXA11    |
| ENSACAG00000008390 | 4030 SLC44A1   |



|                    |               |
|--------------------|---------------|
| ENSACAG00000017277 | 4031 C2CD5    |
| ENSACAG00000021011 | 4032 TIGD1    |
| ENSACAG00000016749 | 4033          |
| ENSACAG00000013037 | 4034 UBA6     |
| ENSACAG00000009878 | 4035 RPS6KA5  |
| ENSACAG00000004654 | 4036          |
| ENSACAG00000012693 | 4037 MMGT1    |
| ENSACAG00000008183 | 4038 AIG1     |
| ENSACAG00000006861 | 4039 DUSP7    |
| ENSACAG00000000960 | 4040 SMG1     |
| ENSACAG00000017500 | 4041          |
| ENSACAG00000017276 | 4042 ALKBH1   |
| ENSACAG00000006101 | 4043 IDH3A    |
| ENSACAG00000006264 | 4044 ZBTB24   |
| ENSACAG00000009465 | 4045 DCAF13   |
| ENSACAG00000011349 | 4046          |
| ENSACAG00000007028 | 4047 UST      |
| ENSACAG00000015662 | 4048 CLCN3    |
| ENSACAG00000008039 | 4049 MASTL    |
| ENSACAG00000013146 | 4050 FANCC    |
| ENSACAG00000005901 | 4051 CENPF    |
| ENSACAG00000015268 | 4052 SH3PXD2B |
| ENSACAG00000013567 | 4053 LAS1L    |
| ENSACAG00000015144 | 4054 SUCLG2   |
| ENSACAG00000001222 | 4055 ANAPC16  |
| ENSACAG00000010119 | 4056 PRMT7    |
| ENSACAG00000029479 | 4057          |
| ENSACAG00000004954 | 4058 OBFC1    |
| ENSACAG00000010005 | 4059          |
| ENSACAG00000029227 | 4060 SSBP2    |
| ENSACAG00000015890 | 4061 TRAPPC6B |
| ENSACAG00000001798 | 4062 CCDC93   |
| ENSACAG00000010739 | 4063          |
| ENSACAG00000010684 | 4064 MYLPF    |
| ENSACAG00000003954 | 4065 SLF2     |
| ENSACAG00000016458 | 4066 RPGRIP1L |
| ENSACAG00000017856 | 4067 AGPAT3   |
| ENSACAG00000012222 | 4068 DAZAP2   |
| ENSACAG00000002066 | 4069 NCAPG    |
| ENSACAG00000003864 | 4070 SGCD     |
| ENSACAG00000012254 | 4071 ASF1B    |
| ENSACAG00000005353 | 4072 PPP2R5D  |

|                    |              |
|--------------------|--------------|
| ENSACAG00000003968 | 4073         |
| ENSACAG00000001135 | 4074 PCF11   |
| ENSACAG00000004981 | 4075 PAX3    |
| ENSACAG00000009054 | 4076 DNAJC1  |
| ENSACAG00000018895 | 4077 SNORD31 |
| ENSACAG00000009578 | 4078 TGIF1   |
| ENSACAG00000009569 | 4079         |
| ENSACAG00000009139 | 4080 ZDHHC9  |
| ENSACAG00000011337 | 4081         |
| ENSACAG00000016433 | 4082 MAP3K14 |
| ENSACAG00000026489 | 4083 KRTCAP2 |
| ENSACAG00000009472 | 4084 UTP6    |
| ENSACAG00000013602 | 4085 DTNB    |
| ENSACAG00000003355 | 4086 ZFYVE19 |
| ENSACAG00000013297 | 4087 SPATA7  |
| ENSACAG00000006542 | 4088         |
| ENSACAG00000000067 | 4089 PTPN5   |
| ENSACAG00000006117 | 4090 SMYD2   |
| ENSACAG00000011979 | 4091 ATP2B1  |
| ENSACAG00000007029 | 4092 GPR137C |
| ENSACAG00000016163 | 4093 ITPR3   |
| ENSACAG00000029342 | 4094 ITGB3BP |
| ENSACAG00000007718 | 4095 CNOT11  |
| ENSACAG00000000759 | 4096 UBR2    |
| ENSACAG00000015386 | 4097 TMED1   |
| ENSACAG00000002827 | 4098 RUBCN   |
| ENSACAG00000024230 | 4099         |
| ENSACAG00000005134 | 4100 MRPL2   |
| ENSACAG00000023806 | 4101         |
| ENSACAG00000002419 | 4102 ATXN2   |
| ENSACAG00000008386 | 4103 RAVR1   |
| ENSACAG00000024462 | 4104 EMD     |
| ENSACAG00000028495 | 4105         |
| ENSACAG00000004672 | 4106 SPG21   |
| ENSACAG00000008572 | 4107 MAGT1   |
| ENSACAG00000001056 | 4108 HIRA    |
| ENSACAG00000017990 | 4109 ACAA2   |
| ENSACAG00000004365 | 4110 SLC1A2  |
| ENSACAG00000005445 | 4111 GMDS    |
| ENSACAG00000005464 | 4112 NAT9    |
| ENSACAG00000028632 | 4113         |
| ENSACAG00000003653 | 4114 CNDP2   |

|                    |              |
|--------------------|--------------|
| ENSACAG00000006993 | 4115 ZNF740  |
| ENSACAG00000011770 | 4116 SCAPER  |
| ENSACAG00000012875 | 4117 CASP6   |
| ENSACAG00000001333 | 4118 CLIP1   |
| ENSACAG00000016682 | 4119 CYTH2   |
| ENSACAG00000016043 | 4120 SPATS2L |
| ENSACAG00000015715 | 4121 GGA1    |
| ENSACAG00000009757 | 4122 DUS2    |
| ENSACAG00000007996 | 4123 RPP30   |
| ENSACAG00000016164 | 4124 COQ6    |
| ENSACAG00000014079 | 4125 LRRC42  |
| ENSACAG00000007953 | 4126 ETAA1   |
| ENSACAG00000008443 | 4127 RAVR2   |
| ENSACAG00000015534 | 4128 EPN1    |
| ENSACAG00000016626 | 4129         |
| ENSACAG00000015533 | 4130 PRMT3   |
| ENSACAG00000011116 | 4131 ESCO2   |
| ENSACAG00000027292 | 4132 SNORD12 |
| ENSACAG00000014322 | 4133 NUS1    |
| ENSACAG00000016123 | 4134 NUMB    |
| ENSACAG00000000979 | 4135 WASL    |
| ENSACAG00000017868 | 4136 KRT19   |
| ENSACAG00000009987 | 4137 ITPR1   |
| ENSACAG00000008307 | 4138 THOC1   |
| ENSACAG00000002878 | 4139 PHAX    |
| ENSACAG00000014577 | 4140 PIK3AP1 |
| ENSACAG00000015199 | 4141 ZNF292  |
| ENSACAG00000015802 | 4142 LGR4    |
| ENSACAG00000010491 | 4143 PUM2    |
| ENSACAG00000004294 | 4144 PPP1R2  |
| ENSACAG00000017680 | 4145 FEN1    |
| ENSACAG00000001596 | 4146 MRPL3   |
| ENSACAG00000029126 | 4147 PCGF6   |
| ENSACAG00000011165 | 4148 MRPS30  |
| ENSACAG00000022864 | 4149         |
| ENSACAG00000009847 | 4150 CPNE3   |
| ENSACAG00000008420 | 4151 VTA1    |
| ENSACAG00000003339 | 4152 RCBTB2  |
| ENSACAG00000008657 | 4153 ENOX2   |
| ENSACAG00000002379 | 4154 ERO1B   |
| ENSACAG00000011731 | 4155 ARNT2   |
| ENSACAG00000009622 | 4156 TNNT3   |

|                    |               |
|--------------------|---------------|
| ENSACAG00000001250 | 4157 OLFML2B  |
| ENSACAG00000009645 | 4158 RHOT1    |
| ENSACAG00000009779 | 4159 HAUS7    |
| ENSACAG00000008410 | 4160 MST1R    |
| ENSACAG00000016982 | 4161 TTLL5    |
| ENSACAG00000014430 | 4162 SACM1L   |
| ENSACAG00000005723 | 4163 PRKX     |
| ENSACAG00000010371 | 4164 USP45    |
| ENSACAG00000009369 | 4165 TRIP11   |
| ENSACAG00000013243 | 4166 FBP1     |
| ENSACAG00000016121 | 4167 MGAT4B   |
| ENSACAG00000002456 | 4168 KLHL42   |
| ENSACAG00000013638 | 4169          |
| ENSACAG00000013815 | 4170 ITPKA    |
| ENSACAG00000013107 | 4171 BUB1     |
| ENSACAG00000008157 | 4172 STRN     |
| ENSACAG00000007722 | 4173 COTL1    |
| ENSACAG00000011405 | 4174          |
| ENSACAG00000012376 | 4175 DNM1L    |
| ENSACAG00000010535 | 4176 ATF6B    |
| ENSACAG00000023859 | 4177          |
| ENSACAG00000014702 | 4178 RPGR     |
| ENSACAG00000001252 | 4179 TJP2     |
| ENSACAG00000002246 | 4180 CRYL1    |
| ENSACAG00000009273 | 4181 ATP6V1C1 |
| ENSACAG00000012747 | 4182 ZMAT2    |
| ENSACAG00000016360 | 4183 MYADM    |
| ENSACAG00000022140 | 4184 TFE3     |
| ENSACAG00000009375 | 4185          |
| ENSACAG00000000833 | 4186 ACTR10   |
| ENSACAG00000011961 | 4187          |
| ENSACAG00000009573 | 4188 CCDC127  |
| ENSACAG00000004264 | 4189 MCFD2    |
| ENSACAG00000010981 | 4190 DOCK5    |
| ENSACAG00000015958 | 4191          |
| ENSACAG00000012305 | 4192 RBSN     |
| ENSACAG00000007250 | 4193 ATP11B   |
| ENSACAG00000001662 | 4194 DGKH     |
| ENSACAG00000000900 | 4195 BEND7    |
| ENSACAG00000010318 | 4196 TAMM41   |
| ENSACAG00000001290 | 4197 CHAF1A   |
| ENSACAG00000013493 | 4198 BANP     |

|                    |               |
|--------------------|---------------|
| ENSACAG00000024785 | 4199 ACOT7    |
| ENSACAG00000010881 | 4200 TPM2     |
| ENSACAG00000017968 | 4201          |
| ENSACAG00000009588 | 4202          |
| ENSACAG00000012476 | 4203 SCAMP1   |
| ENSACAG00000003155 | 4204 WDR37    |
| ENSACAG00000012908 | 4205 PPM1K    |
| ENSACAG00000012433 | 4206 PRRC2A   |
| ENSACAG00000005233 | 4207 AMMECR1L |
| ENSACAG00000004539 | 4208 ABI2     |
| ENSACAG00000017658 | 4209 STARD3NL |
| ENSACAG00000007448 | 4210 ARHGAP23 |
| ENSACAG00000001929 | 4211          |
| ENSACAG00000002052 | 4212 KBTBD4   |
| ENSACAG00000019388 | 4213 7SK      |
| ENSACAG00000010781 | 4214 HAUS6    |
| ENSACAG00000016000 | 4215 TBC1D9B  |
| ENSACAG00000007864 | 4216 TBC1D5   |
| ENSACAG00000009364 | 4217 FZD6     |
| ENSACAG00000009455 | 4218 NCOA6    |
| ENSACAG00000010985 | 4219 DCBLD2   |
| ENSACAG00000014674 | 4220 TDP1     |
| ENSACAG00000002208 | 4221          |
| ENSACAG00000004616 | 4222          |
| ENSACAG00000017941 | 4223 RHOC     |
| ENSACAG00000013570 | 4224          |
| ENSACAG00000003988 | 4225 RIC1     |
| ENSACAG00000013866 | 4226 SDF2     |
| ENSACAG00000012308 | 4227 EMC10    |
| ENSACAG00000001336 | 4228 ATF6     |
| ENSACAG00000015877 | 4229 PDK1     |
| ENSACAG00000013526 | 4230 MAML2    |
| ENSACAG00000003059 | 4231          |
| ENSACAG00000014729 | 4232 SCARB1   |
| ENSACAG00000015671 | 4233 RFX1     |
| ENSACAG00000000526 | 4234 FUNDC2   |
| ENSACAG00000005804 | 4235 TSSC1    |
| ENSACAG00000013881 | 4236 ACP6     |
| ENSACAG00000016560 | 4237 COG6     |
| ENSACAG00000016467 | 4238 FTO      |
| ENSACAG00000012152 | 4239          |
| ENSACAG00000013747 | 4240          |

|                     |               |
|---------------------|---------------|
| ENSACAG00000025027  | 4241          |
| ENSACAG00000001004  | 4242 DNAJB12  |
| ENSACAG00000001084  | 4243 SAMSN1   |
| ENSACAG000000017936 | 4244 ATP6VOA1 |
| ENSACAG000000005735 | 4245 CEP250   |
| ENSACAG000000007714 | 4246 SMARCC2  |
| ENSACAG000000008750 | 4247 BTBD7    |
| ENSACAG000000012726 | 4248 INTS6    |
| ENSACAG000000011505 | 4249 PPP1R11  |
| ENSACAG000000006540 | 4250          |
| ENSACAG000000007467 | 4251          |
| ENSACAG000000002526 | 4252 XPO4     |
| ENSACAG000000012282 | 4253 GAS2L3   |
| ENSACAG000000003642 | 4254 RBM43    |
| ENSACAG000000003368 | 4255 ANAPC10  |
| ENSACAG000000008218 | 4256 REV1     |
| ENSACAG000000007637 | 4257 EFTUD2   |
| ENSACAG000000010006 | 4258 AAGAB    |
| ENSACAG000000001075 | 4259 CCNY     |
| ENSACAG000000012756 | 4260          |
| ENSACAG000000005211 | 4261          |
| ENSACAG000000013912 | 4262 CCDC84   |
| ENSACAG000000016942 | 4263 PROSER2  |
| ENSACAG000000011945 | 4264          |
| ENSACAG000000005195 | 4265 CLN8     |
| ENSACAG000000001285 | 4266 URB2     |
| ENSACAG000000018006 | 4267 CTIF     |
| ENSACAG000000010966 | 4268 SORBS3   |
| ENSACAG000000028974 | 4269          |
| ENSACAG000000008203 | 4270 TAF7     |
| ENSACAG000000011465 | 4271 THRB     |
| ENSACAG000000011213 | 4272 POLR3H   |
| ENSACAG000000017747 | 4273 MRPL54   |
| ENSACAG000000006300 | 4274 GIGYF2   |
| ENSACAG000000002326 | 4275          |
| ENSACAG000000010997 | 4276 INSIG1   |
| ENSACAG000000020317 | 4277 5S_rRNA  |
| ENSACAG000000005748 | 4278 INPP5A   |
| ENSACAG000000007349 | 4279 NMD3     |
| ENSACAG000000015448 | 4280 NUP88    |
| ENSACAG000000012530 | 4281 STAM2    |
| ENSACAG000000006746 | 4282 SDPR     |

|                    |               |
|--------------------|---------------|
| ENSACAG00000003398 | 4283 KIF13A   |
| ENSACAG00000009050 | 4284 EMC4     |
| ENSACAG00000010196 | 4285          |
| ENSACAG00000010077 | 4286          |
| ENSACAG00000009408 | 4287 NAA25    |
| ENSACAG00000006683 | 4288 NKTR     |
| ENSACAG00000012864 | 4289 MBTPS1   |
| ENSACAG00000005770 | 4290 STXBP3   |
| ENSACAG00000006287 | 4291 XPNPEP1  |
| ENSACAG00000012116 | 4292 STK19    |
| ENSACAG00000001049 | 4293 EXOC6B   |
| ENSACAG00000015203 | 4294 CDC26    |
| ENSACAG00000011145 | 4295 ANKRD17  |
| ENSACAG00000016500 | 4296 SIPA1L1  |
| ENSACAG00000009009 | 4297 THOC5    |
| ENSACAG00000015148 | 4298 TAGLN3   |
| ENSACAG00000012782 | 4299 SOX6     |
| ENSACAG00000013825 | 4300 TRIM13   |
| ENSACAG00000011894 | 4301 ZCCHC7   |
| ENSACAG00000008698 | 4302 HMGCR    |
| ENSACAG00000004473 | 4303 DESI2    |
| ENSACAG00000015208 | 4304 SLC31A1  |
| ENSACAG00000001494 | 4305 ZNF800   |
| ENSACAG00000015583 | 4306 NLK      |
| ENSACAG00000022557 | 4307          |
| ENSACAG00000013126 | 4308 RAB43    |
| ENSACAG00000002295 | 4309 NUP58    |
| ENSACAG00000012215 | 4310 FBXL5    |
| ENSACAG00000001773 | 4311 ECM1     |
| ENSACAG00000005072 | 4312 TRDMT1   |
| ENSACAG00000016624 | 4313          |
| ENSACAG00000011388 | 4314 FAM214A  |
| ENSACAG00000004974 | 4315 ACBD6    |
| ENSACAG00000000226 | 4316          |
| ENSACAG00000000741 | 4317 PPARGC1A |
| ENSACAG00000010211 | 4318 MTRR     |
| ENSACAG00000011431 | 4319 MIER1    |
| ENSACAG00000012200 | 4320 EHMT1    |
| ENSACAG00000012868 | 4321          |
| ENSACAG00000012574 | 4322 LHFPL2   |
| ENSACAG00000006012 | 4323 SDE2     |
| ENSACAG00000013268 | 4324 WIP1     |

|                    |               |
|--------------------|---------------|
| ENSACAG00000000776 | 4325 ATG4B    |
| ENSACAG00000003264 | 4326 SPPL3    |
| ENSACAG00000009630 | 4327 TJAP1    |
| ENSACAG00000004448 | 4328 BORCS5   |
| ENSACAG00000004688 | 4329          |
| ENSACAG00000028676 | 4330          |
| ENSACAG00000023811 | 4331 ZEB2     |
| ENSACAG00000011345 | 4332          |
| ENSACAG00000006024 | 4333 GALM     |
| ENSACAG00000015300 | 4334 SLC38A10 |
| ENSACAG00000011848 | 4335 PAK4     |
| ENSACAG00000000575 | 4336 TRMT6    |
| ENSACAG00000017407 | 4337 MYL4     |
| ENSACAG00000010934 | 4338 MKRN3    |
| ENSACAG00000010514 | 4339 LNX1     |
| ENSACAG00000005313 | 4340 FASTK    |
| ENSACAG00000015926 | 4341 STX5     |
| ENSACAG00000017166 | 4342 FARSA    |
| ENSACAG00000011844 | 4343          |
| ENSACAG00000016683 | 4344 PAPD4    |
| ENSACAG00000003495 | 4345 DCLK2    |
| ENSACAG00000008081 | 4346 PDCL3    |
| ENSACAG00000017386 | 4347 PARK7    |
| ENSACAG00000011751 | 4348 SPRY1    |
| ENSACAG00000009436 | 4349 SLC25A32 |
| ENSACAG00000012871 | 4350          |
| ENSACAG00000012071 | 4351 DXO      |
| ENSACAG00000017220 | 4352 NOTCH3   |
| ENSACAG00000015815 | 4353 SHOC2    |
| ENSACAG00000012593 | 4354 LIMD2    |
| ENSACAG00000009458 | 4355 AVL9     |
| ENSACAG00000007287 | 4356 STX4     |
| ENSACAG00000009112 | 4357 FHL1     |
| ENSACAG00000022624 | 4358 GSDMA    |
| ENSACAG00000010868 | 4359 GNB5     |
| ENSACAG00000007557 | 4360 RNF123   |
| ENSACAG00000015027 | 4361          |
| ENSACAG00000009822 | 4362 GDNF     |
| ENSACAG00000004007 | 4363 GMPR2    |
| ENSACAG00000008382 | 4364 FAM135A  |
| ENSACAG00000001583 | 4365 BRMS1L   |
| ENSACAG00000010123 | 4366          |



|                    |               |
|--------------------|---------------|
| ENSACAG00000004694 | 4367          |
| ENSACAG00000005755 | 4368 DOK7     |
| ENSACAG00000015458 | 4369 KMT2D    |
| ENSACAG00000012050 | 4370 JOSD2    |
| ENSACAG00000000015 | 4371 KAT2B    |
| ENSACAG00000024010 | 4372          |
| ENSACAG00000000495 | 4373          |
| ENSACAG00000008680 | 4374 PFKL     |
| ENSACAG00000000088 | 4375 CHD2     |
| ENSACAG00000000923 | 4376          |
| ENSACAG00000001992 | 4377 RPS15    |
| ENSACAG00000009100 | 4378 MLLT10   |
| ENSACAG00000015532 | 4379 NUAK1    |
| ENSACAG00000000781 | 4380 PLCB3    |
| ENSACAG00000026095 | 4381 UQCC2    |
| ENSACAG00000006139 | 4382 MPP5     |
| ENSACAG00000011494 | 4383 POGZ     |
| ENSACAG00000009090 | 4384 DSCR3    |
| ENSACAG00000012521 | 4385 SCYL2    |
| ENSACAG00000016801 | 4386 DYRK1B   |
| ENSACAG00000001003 | 4387 TDRD7    |
| ENSACAG00000015191 | 4388 BCAP29   |
| ENSACAG00000016502 | 4389 ETFDH    |
| ENSACAG00000023781 | 4390 HINT3    |
| ENSACAG00000008810 | 4391 PKDCC    |
| ENSACAG00000006198 | 4392 BTAF1    |
| ENSACAG00000007847 | 4393 AGGF1    |
| ENSACAG00000000344 | 4394 EXOC5    |
| ENSACAG00000024666 | 4395          |
| ENSACAG00000001244 | 4396 ASCC1    |
| ENSACAG00000002665 | 4397          |
| ENSACAG00000004132 | 4398 KIAA2026 |
| ENSACAG00000004763 | 4399 MFAP1    |
| ENSACAG00000007685 | 4400 EIF2A    |
| ENSACAG00000002229 | 4401 SERPINH1 |
| ENSACAG00000014348 | 4402          |
| ENSACAG00000001335 | 4403 ARF6     |
| ENSACAG00000027313 | 4404 APOA1BP  |
| ENSACAG00000008776 | 4405 KANSL2   |
| ENSACAG00000005252 | 4406 NTRK3    |
| ENSACAG00000006580 | 4407 NCAPD2   |
| ENSACAG00000004804 | 4408 TPCN1    |

|                     |               |
|---------------------|---------------|
| ENSACAG00000006308  | 4409 SHF      |
| ENSACAG00000001771  | 4410 RNF8     |
| ENSACAG00000003808  | 4411 NACC1    |
| ENSACAG000000013167 | 4412 MAD2L1   |
| ENSACAG00000002895  | 4413 UBLCP1   |
| ENSACAG000000012572 | 4414          |
| ENSACAG000000008642 | 4415 IGSF3    |
| ENSACAG00000003246  | 4416 MAPK8IP3 |
| ENSACAG000000015868 | 4417 UNC5B    |
| ENSACAG000000017025 | 4418 PKD2L2   |
| ENSACAG000000005068 | 4419 MEDAG    |
| ENSACAG00000003396  | 4420 GNS      |
| ENSACAG000000016198 | 4421 TNRC6C   |
| ENSACAG000000017404 | 4422          |
| ENSACAG000000022301 | 4423          |
| ENSACAG000000005482 | 4424 KLHL18   |
| ENSACAG000000004179 | 4425 PTDSS1   |
| ENSACAG000000002772 | 4426 GATB     |
| ENSACAG000000006899 | 4427 C1orf35  |
| ENSACAG000000003660 | 4428 NQO1     |
| ENSACAG000000010308 | 4429          |
| ENSACAG000000000375 | 4430 SUPT5H   |
| ENSACAG000000006463 | 4431 MIF4GD   |
| ENSACAG000000005324 | 4432 LZTR1    |
| ENSACAG000000013044 | 4433 TSFM     |
| ENSACAG000000010238 | 4434 SLC7A6OS |
| ENSACAG000000014296 | 4435 ADH5     |
| ENSACAG000000005945 | 4436 SPCS3    |
| ENSACAG000000020359 | 4437 snoR38   |
| ENSACAG000000024118 | 4438 RAPGEF1  |
| ENSACAG000000012976 | 4439 DCK      |
| ENSACAG000000012730 | 4440 TUB      |
| ENSACAG000000013876 | 4441 SLC4A7   |
| ENSACAG000000010294 | 4442 SUMF1    |
| ENSACAG000000012262 | 4443 TM7SF3   |
| ENSACAG000000013623 | 4444          |
| ENSACAG000000009489 | 4445 ACSL5    |
| ENSACAG000000011438 | 4446 ABHD18   |
| ENSACAG000000008263 | 4447 TROVE2   |
| ENSACAG000000003669 | 4448 JARID2   |
| ENSACAG000000004470 | 4449 FRS2     |
| ENSACAG000000016256 | 4450 COPA     |

|                    |               |
|--------------------|---------------|
| ENSACAG00000017313 | 4451 ADCK1    |
| ENSACAG00000014250 | 4452 PPP1R21  |
| ENSACAG00000022510 | 4453 DLAT     |
| ENSACAG00000025702 | 4454          |
| ENSACAG00000016111 | 4455 ZNF410   |
| ENSACAG00000012110 | 4456 SLC9A7   |
| ENSACAG00000002031 | 4457 FLNB     |
| ENSACAG00000006790 | 4458 OSBPL8   |
| ENSACAG00000009010 | 4459 GPC4     |
| ENSACAG00000007191 | 4460          |
| ENSACAG00000017515 | 4461 CAAP1    |
| ENSACAG00000015124 | 4462 GAS2     |
| ENSACAG00000007454 | 4463          |
| ENSACAG00000001862 | 4464 DUSP11   |
| ENSACAG00000001179 | 4465 ABCB7    |
| ENSACAG00000000947 | 4466 CREM     |
| ENSACAG00000003796 | 4467 HSD17B4  |
| ENSACAG00000010904 | 4468 WDR91    |
| ENSACAG00000028566 | 4469          |
| ENSACAG00000017697 | 4470          |
| ENSACAG00000006568 | 4471 DDHD1    |
| ENSACAG00000005874 | 4472          |
| ENSACAG00000004509 | 4473          |
| ENSACAG00000007290 | 4474 RAB32    |
| ENSACAG00000009342 | 4475 NT5C3A   |
| ENSACAG00000015120 | 4476 SLTM     |
| ENSACAG00000010651 | 4477 ATP1B1   |
| ENSACAG00000009770 | 4478 WDR70    |
| ENSACAG00000001545 | 4479 ZCCHC8   |
| ENSACAG00000004295 | 4480 ME1      |
| ENSACAG00000016148 | 4481 TDG      |
| ENSACAG00000010433 | 4482          |
| ENSACAG00000013775 | 4483 ITFG1    |
| ENSACAG00000016856 | 4484 FAM45A   |
| ENSACAG00000016381 | 4485 DPF3     |
| ENSACAG00000010049 | 4486 TTC7B    |
| ENSACAG00000016817 | 4487 GRASP    |
| ENSACAG00000026004 | 4488          |
| ENSACAG00000015703 | 4489 PLRG1    |
| ENSACAG00000006129 | 4490 CARS2    |
| ENSACAG00000016943 | 4491 C19orf70 |
| ENSACAG00000007080 | 4492 NT5DC2   |

|                    |               |
|--------------------|---------------|
| ENSACAG00000003403 | 4493 PRKAB1   |
| ENSACAG00000008361 | 4494 BRWD3    |
| ENSACAG00000008062 | 4495 FUCA2    |
| ENSACAG00000002710 | 4496 MTMR10   |
| ENSACAG00000016540 | 4497 ZMYND8   |
| ENSACAG00000001393 | 4498 CEP112   |
| ENSACAG00000013441 | 4499 TMEM106C |
| ENSACAG00000005563 | 4500          |
| ENSACAG00000003477 | 4501 LEMD3    |
| ENSACAG00000002486 | 4502          |
| ENSACAG00000000059 | 4503 HPS5     |
| ENSACAG00000016406 | 4504 RCOR3    |
| ENSACAG00000018002 | 4505 DYM      |
| ENSACAG00000007199 | 4506 TBC1D1   |
| ENSACAG00000005773 | 4507 DGKD     |
| ENSACAG00000005468 | 4508 NSMAF    |
| ENSACAG00000006321 | 4509 SUV39H1  |
| ENSACAG00000014691 | 4510 APP      |
| ENSACAG00000009401 | 4511 ARHGEF6  |
| ENSACAG00000007638 | 4512          |
| ENSACAG00000008908 | 4513          |
| ENSACAG00000004648 | 4514 PARL     |
| ENSACAG00000012902 | 4515 RALGPS2  |
| ENSACAG00000015279 | 4516 PTS      |
| ENSACAG00000010254 | 4517 RAD17    |
| ENSACAG00000003107 | 4518 MIPEP    |
| ENSACAG00000017577 | 4519 NET1     |
| ENSACAG00000023996 | 4520 TOM1     |
| ENSACAG00000004724 | 4521 DNAJA3   |
| ENSACAG00000002737 | 4522 SH3BP5   |
| ENSACAG00000009839 | 4523 NFATC3   |
| ENSACAG00000009136 | 4524 BRD1     |
| ENSACAG00000012077 | 4525 PDE11A   |
| ENSACAG00000009554 | 4526 WWP1     |
| ENSACAG00000029310 | 4527          |
| ENSACAG00000016211 | 4528 MAML1    |
| ENSACAG00000001892 | 4529 BICC1    |
| ENSACAG00000007423 | 4530 SVIL     |
| ENSACAG00000014964 | 4531 LSAMP    |
| ENSACAG00000005513 | 4532 DPYD     |
| ENSACAG00000004461 | 4533          |
| ENSACAG00000005182 | 4534 SAP130   |

|                    |              |
|--------------------|--------------|
| ENSACAG00000014373 | 4535         |
| ENSACAG00000000646 | 4536 MYCBP2  |
| ENSACAG00000022970 | 4537         |
| ENSACAG00000003094 | 4538 MAP3K4  |
| ENSACAG00000011744 | 4539 ACTR8   |
| ENSACAG00000016923 | 4540 MAP3K5  |
| ENSACAG00000010599 | 4541 C5orf51 |
| ENSACAG00000017024 | 4542 UTP11L  |
| ENSACAG00000000574 | 4543 MON2    |
| ENSACAG00000011898 | 4544 GRHPR   |
| ENSACAG00000028257 | 4545 SOAT1   |
| ENSACAG00000002019 | 4546 ARL14EP |
| ENSACAG00000006844 | 4547 TMEM186 |
| ENSACAG00000002132 | 4548         |
| ENSACAG00000004246 | 4549         |
| ENSACAG00000000835 | 4550         |
| ENSACAG00000010939 | 4551         |
| ENSACAG00000002664 | 4552 TFEB    |
| ENSACAG00000013769 | 4553         |
| ENSACAG00000006967 | 4554 SAP30BP |
| ENSACAG00000006836 | 4555 BBS4    |
| ENSACAG00000004906 | 4556 XPR1    |
| ENSACAG00000004348 | 4557 CDKN1B  |
| ENSACAG00000012808 | 4558 CDH7    |
| ENSACAG00000005372 | 4559 SLC4A2  |
| ENSACAG00000016868 | 4560 TLK2    |
| ENSACAG00000003259 | 4561 CEP120  |
| ENSACAG00000016596 | 4562 METTL8  |
| ENSACAG00000015912 | 4563 CHST11  |
| ENSACAG00000002334 | 4564 ZDHHC1  |
| ENSACAG00000000107 | 4565 FOXRED1 |
| ENSACAG00000028844 | 4566 ERICH1  |
| ENSACAG00000005400 | 4567 HTT     |
| ENSACAG00000008583 | 4568 GNA12   |
| ENSACAG00000017059 | 4569 PPP6R1  |
| ENSACAG00000013133 | 4570 MIOS    |
| ENSACAG00000010297 | 4571         |
| ENSACAG00000012001 | 4572         |
| ENSACAG00000017077 | 4573 MPI     |
| ENSACAG00000007424 | 4574 TCTA    |
| ENSACAG00000026691 | 4575         |
| ENSACAG00000015982 | 4576 GLOD4   |

|                    |               |
|--------------------|---------------|
| ENSACAG00000016855 | 4577 TNFAIP3  |
| ENSACAG00000009818 | 4578 ATP6V0D1 |
| ENSACAG00000012465 | 4579 SNX29    |
| ENSACAG00000013400 | 4580 SSU72    |
| ENSACAG00000012784 | 4581 RAB7B    |
| ENSACAG00000002785 | 4582          |
| ENSACAG00000003938 | 4583 YIF1B    |
| ENSACAG00000028513 | 4584          |
| ENSACAG00000008656 | 4585          |
| ENSACAG00000014405 | 4586 CXorf38  |
| ENSACAG00000013080 | 4587 OSBPL3   |
| ENSACAG00000000166 | 4588 CHRAC1   |
| ENSACAG00000009479 | 4589 C12orf4  |
| ENSACAG00000001618 | 4590 XRCC6BP1 |
| ENSACAG00000008521 | 4591 COMTD1   |
| ENSACAG00000019734 | 4592 SNORA8   |
| ENSACAG00000003802 | 4593          |
| ENSACAG00000017097 | 4594 NT5C3B   |
| ENSACAG00000026596 | 4595 ELP5     |
| ENSACAG00000009053 | 4596 TMEM14A  |
| ENSACAG00000013981 | 4597 RCBTB1   |
| ENSACAG00000010843 | 4598          |
| ENSACAG00000017475 | 4599          |
| ENSACAG00000007783 | 4600 GTSE1    |
| ENSACAG00000009297 | 4601 ENC1     |
| ENSACAG00000009137 | 4602 CEP135   |
| ENSACAG00000008981 | 4603          |
| ENSACAG00000013169 | 4604 FAM210A  |
| ENSACAG00000011710 | 4605 POLD2    |
| ENSACAG00000006362 | 4606 TUBGCP3  |
| ENSACAG00000004772 | 4607 MGRN1    |
| ENSACAG00000006999 | 4608 TAB2     |
| ENSACAG00000004911 | 4609 MAT1A    |
| ENSACAG00000006142 | 4610 PITPNB   |
| ENSACAG00000013721 | 4611 CORO2B   |
| ENSACAG00000004481 | 4612 MTO1     |
| ENSACAG00000015723 | 4613 DCAF15   |
| ENSACAG00000029541 | 4614          |
| ENSACAG00000001719 | 4615          |
| ENSACAG00000001299 | 4616 CCBL2    |
| ENSACAG00000025870 | 4617 GLT1D1   |
| ENSACAG00000002123 | 4618 POLR2B   |

|                     |               |
|---------------------|---------------|
| ENSACAG00000004758  | 4619          |
| ENSACAG00000006685  | 4620 PCM1     |
| ENSACAG00000002680  | 4621 FBXW7    |
| ENSACAG000000016871 | 4622 PKIG     |
| ENSACAG00000001504  | 4623 UHRF1BP1 |
| ENSACAG000000017293 | 4624 TACC2    |
| ENSACAG000000009105 | 4625          |
| ENSACAG000000008604 | 4626 TCIRG1   |
| ENSACAG000000015593 | 4627 TTC17    |
| ENSACAG000000015609 | 4628          |
| ENSACAG000000010047 | 4629 ZNF148   |
| ENSACAG000000016449 | 4630 FBXW8    |
| ENSACAG000000002762 | 4631 MSI1     |
| ENSACAG000000001050 | 4632 CTCF     |
| ENSACAG000000010122 | 4633 TMEM167B |
| ENSACAG000000003422 | 4634 EXO1     |
| ENSACAG000000006120 | 4635 WDR47    |
| ENSACAG000000017676 | 4636 CEP85L   |
| ENSACAG000000029108 | 4637 ZYG11A   |
| ENSACAG000000000447 | 4638 BRCC3    |
| ENSACAG000000014845 | 4639 GXYLT2   |
| ENSACAG000000013682 | 4640          |
| ENSACAG000000005762 | 4641 NFATC2IP |
| ENSACAG000000004634 | 4642 ARHGAP31 |
| ENSACAG000000014300 | 4643 IPO13    |
| ENSACAG000000008609 | 4644 TET2     |
| ENSACAG000000012921 | 4645 GRSF1    |
| ENSACAG000000002408 | 4646 LGALS8   |
| ENSACAG000000009876 | 4647 STX3     |
| ENSACAG000000008596 | 4648 ARHGAP21 |
| ENSACAG000000014506 | 4649 ATL2     |
| ENSACAG000000005025 | 4650 KAT7     |
| ENSACAG000000000693 | 4651 TIMM50   |
| ENSACAG000000006686 | 4652 CDK5RAP3 |
| ENSACAG000000015897 | 4653 MCAT     |
| ENSACAG000000006867 | 4654          |
| ENSACAG000000006712 | 4655 MDFIC    |
| ENSACAG000000022463 | 4656 PGD      |
| ENSACAG000000007849 | 4657 TMEM266  |
| ENSACAG000000011707 | 4658 FYN      |
| ENSACAG000000007233 | 4659 OS9      |
| ENSACAG000000002786 | 4660 IRF2     |

|                    |               |
|--------------------|---------------|
| ENSACAG00000015286 | 4661 NUBPL    |
| ENSACAG00000015587 | 4662 RPS6KA4  |
| ENSACAG00000029273 | 4663 TMEM242  |
| ENSACAG00000000167 | 4664 AGO2     |
| ENSACAG00000029106 | 4665          |
| ENSACAG00000008185 | 4666 CC2D1B   |
| ENSACAG00000007554 | 4667 NRG1     |
| ENSACAG00000001388 | 4668 SDHC     |
| ENSACAG00000013494 | 4669 CCDC126  |
| ENSACAG00000012901 | 4670          |
| ENSACAG00000004126 | 4671 SYMPK    |
| ENSACAG00000001607 | 4672 GEN1     |
| ENSACAG00000016456 | 4673 ARHGEF2  |
| ENSACAG00000012803 | 4674 MOSPD1   |
| ENSACAG00000013039 | 4675          |
| ENSACAG00000017383 | 4676 RECQL    |
| ENSACAG00000016150 | 4677 CHD9     |
| ENSACAG00000009374 | 4678 MAP1LC3A |
| ENSACAG00000001289 | 4679 ARID4B   |
| ENSACAG00000012139 | 4680 FAM120C  |
| ENSACAG00000013350 | 4681 LAMB2    |
| ENSACAG00000009986 | 4682          |
| ENSACAG00000017034 | 4683          |
| ENSACAG00000006821 | 4684 FBXL17   |
| ENSACAG00000007763 | 4685          |
| ENSACAG00000002522 | 4686 WIPF2    |
| ENSACAG00000012270 | 4687 TSR2     |
| ENSACAG00000002669 | 4688 DGCR2    |
| ENSACAG00000009581 | 4689 TMEM165  |
| ENSACAG00000016954 | 4690 KDM1A    |
| ENSACAG00000000211 | 4691 FOPNL    |
| ENSACAG00000006387 | 4692 COA4     |
| ENSACAG00000008770 | 4693 UQCRC2   |
| ENSACAG00000004456 | 4694 WDFY1    |
| ENSACAG00000023505 | 4695 CCAR2    |
| ENSACAG00000001717 | 4696 SLC1A4   |
| ENSACAG00000029259 | 4697 PRELID2  |
| ENSACAG00000009486 | 4698 TC2N     |
| ENSACAG00000016815 | 4699 PARP12   |
| ENSACAG00000003552 | 4700 PDP1     |
| ENSACAG00000018663 | 4701 SNORA1   |
| ENSACAG00000002110 | 4702 UFSP2    |



|                    |               |
|--------------------|---------------|
| ENSACAG00000010910 | 4703 CHRNG    |
| ENSACAG00000005120 | 4704          |
| ENSACAG00000003975 | 4705 FAM179B  |
| ENSACAG00000017454 | 4706 SEL1L    |
| ENSACAG00000016068 | 4707          |
| ENSACAG00000009842 | 4708 LIFR     |
| ENSACAG00000014775 | 4709 SLC35B2  |
| ENSACAG00000016025 | 4710 ELMSAN1  |
| ENSACAG00000028821 | 4711 RWDD4    |
| ENSACAG00000006091 | 4712 MBD1     |
| ENSACAG00000003427 | 4713 PPIC     |
| ENSACAG00000007068 | 4714 FGGY     |
| ENSACAG00000003530 | 4715 NFAT5    |
| ENSACAG00000002047 | 4716 PDLIM3   |
| ENSACAG00000007515 | 4717          |
| ENSACAG00000012928 | 4718          |
| ENSACAG00000015737 | 4719 PPARGC1B |
| ENSACAG00000015759 | 4720 CENPK    |
| ENSACAG00000029345 | 4721 TMEM150C |
| ENSACAG00000015198 | 4722 SLCO5A1  |
| ENSACAG00000017013 | 4723 ACLY     |
| ENSACAG00000013591 | 4724 GLTSCR1  |
| ENSACAG00000012612 | 4725 MAP3K3   |
| ENSACAG00000016808 | 4726 HGS      |
| ENSACAG00000016066 | 4727 SPRY2    |
| ENSACAG00000013147 | 4728          |
| ENSACAG00000017960 | 4729          |
| ENSACAG00000000034 | 4730 KDM5A    |
| ENSACAG00000000818 | 4731          |
| ENSACAG00000010370 | 4732 NRM      |
| ENSACAG00000003785 | 4733 SPPL2A   |
| ENSACAG00000007019 | 4734 TMEM115  |
| ENSACAG00000009877 | 4735 NEDD4L   |
| ENSACAG00000012675 | 4736 UVRAG    |
| ENSACAG00000015660 | 4737 CYP51A1  |
| ENSACAG00000001869 | 4738          |
| ENSACAG00000012558 | 4739 PPP3CA   |
| ENSACAG00000026034 | 4740          |
| ENSACAG00000006728 | 4741 LLGL2    |
| ENSACAG00000003135 | 4742 ZNF608   |
| ENSACAG00000006338 | 4743 FIG4     |
| ENSACAG00000014515 | 4744          |

|                    |               |
|--------------------|---------------|
| ENSACAG00000006827 | 4745 CDK9     |
| ENSACAG00000015656 | 4746 SPATA2   |
| ENSACAG00000003406 | 4747          |
| ENSACAG00000009195 | 4748 TGFBR1   |
| ENSACAG00000007479 | 4749 NOC4L    |
| ENSACAG00000009038 | 4750 PROCR    |
| ENSACAG00000014226 | 4751 PANX1    |
| ENSACAG00000004409 | 4752 NCBP1    |
| ENSACAG00000016301 | 4753 VPS13B   |
| ENSACAG00000011456 | 4754 REV3L    |
| ENSACAG00000017543 | 4755 OAT      |
| ENSACAG00000011825 | 4756          |
| ENSACAG00000027996 | 4757          |
| ENSACAG00000009522 | 4758 ZSWIM8   |
| ENSACAG00000005947 | 4759 VEGFC    |
| ENSACAG00000010344 | 4760 TRIB1    |
| ENSACAG00000006464 | 4761 PRPF6    |
| ENSACAG00000017398 | 4762 ELAC2    |
| ENSACAG00000009340 | 4763          |
| ENSACAG00000005566 | 4764 NSD1     |
| ENSACAG00000008712 | 4765 CPT2     |
| ENSACAG00000002773 | 4766 DENND2C  |
| ENSACAG00000004000 | 4767 ACTR1A   |
| ENSACAG00000023040 | 4768          |
| ENSACAG00000003762 | 4769 DTNBP1   |
| ENSACAG00000006643 | 4770 FAM192A  |
| ENSACAG00000015720 | 4771          |
| ENSACAG00000004272 | 4772          |
| ENSACAG00000017750 | 4773 TKFC     |
| ENSACAG00000004394 | 4774 ACAT2    |
| ENSACAG00000016707 | 4775 ERN1     |
| ENSACAG00000001897 | 4776 JADE2    |
| ENSACAG00000004385 | 4777 DHPS     |
| ENSACAG00000006792 | 4778 PIEZO1   |
| ENSACAG00000000245 | 4779 MFSD7    |
| ENSACAG00000000896 | 4780 NUP133   |
| ENSACAG00000001993 | 4781 ITGB1BP1 |
| ENSACAG00000001846 | 4782 SH3RF3   |
| ENSACAG00000012799 | 4783 DENND5B  |
| ENSACAG00000002184 | 4784 ELP4     |
| ENSACAG00000008791 | 4785 GATAD2B  |
| ENSACAG00000026194 | 4786 TMEM259  |

|                    |              |
|--------------------|--------------|
| ENSACAG00000008532 | 4787 OGFRL1  |
| ENSACAG00000003925 | 4788 NAV1    |
| ENSACAG00000005229 | 4789         |
| ENSACAG00000012065 | 4790 ZNF598  |
| ENSACAG00000016393 | 4791         |
| ENSACAG00000016162 | 4792 PREX1   |
| ENSACAG00000016227 | 4793 SEMA3A  |
| ENSACAG00000016051 | 4794 HCFC2   |
| ENSACAG00000001642 | 4795         |
| ENSACAG00000007907 | 4796 FLOT2   |
| ENSACAG00000004355 | 4797 LRCH2   |
| ENSACAG00000006871 | 4798         |
| ENSACAG00000016226 | 4799 SIL1    |
| ENSACAG00000016321 | 4800 HEXIM1  |
| ENSACAG00000003990 | 4801 AGL     |
| ENSACAG00000013950 | 4802         |
| ENSACAG00000014219 | 4803 RIMBP2  |
| ENSACAG00000013083 | 4804         |
| ENSACAG00000029568 | 4805 SLC29A1 |
| ENSACAG00000023287 | 4806 TGFB1   |
| ENSACAG00000005976 | 4807 ATG16L1 |
| ENSACAG00000015531 | 4808 CSF1R   |
| ENSACAG00000003778 | 4809 TIMM21  |
| ENSACAG00000003450 | 4810 FDPS    |
| ENSACAG00000009747 | 4811 PTC2    |
| ENSACAG00000006175 | 4812 ZNF518A |
| ENSACAG00000012343 | 4813 STK38L  |
| ENSACAG00000013868 | 4814 RWDD1   |
| ENSACAG00000002503 | 4815 CDC6    |
| ENSACAG00000006530 | 4816 PHF6    |
| ENSACAG00000001915 | 4817 ORC2    |
| ENSACAG00000006690 | 4818         |
| ENSACAG00000008117 | 4819 JOSD1   |
| ENSACAG00000000165 | 4820 CDON    |
| ENSACAG00000003625 | 4821 UPF3B   |
| ENSACAG00000005359 | 4822 LIMS2   |
| ENSACAG00000012604 | 4823 HSF1    |
| ENSACAG00000029455 | 4824 PARPBP  |
| ENSACAG00000021148 | 4825 NAPG    |
| ENSACAG00000002276 | 4826 SWT1    |
| ENSACAG00000003441 | 4827 CIT     |
| ENSACAG00000013977 | 4828 ENDOD1  |

|                    |               |
|--------------------|---------------|
| ENSACAG00000028327 | 4829          |
| ENSACAG00000028017 | 4830          |
| ENSACAG00000003680 | 4831 PXN      |
| ENSACAG00000012501 | 4832 DHX58    |
| ENSACAG00000012035 | 4833 ATG4A    |
| ENSACAG00000012446 | 4834 ARNTL2   |
| ENSACAG00000003243 | 4835          |
| ENSACAG00000006847 | 4836 RBL1     |
| ENSACAG00000001610 | 4837 MRPL14   |
| ENSACAG00000003327 | 4838 SLC22A15 |
| ENSACAG00000001601 | 4839 FEZ2     |
| ENSACAG00000009051 | 4840 LMBRD2   |
| ENSACAG00000008615 | 4841 SF3B2    |
| ENSACAG00000000739 | 4842 DTYMK    |
| ENSACAG00000000992 | 4843 DIABLO   |
| ENSACAG00000011127 | 4844 LAP3     |
| ENSACAG00000017465 | 4845 CD37     |
| ENSACAG00000003262 | 4846 RFX3     |
| ENSACAG00000023217 | 4847          |
| ENSACAG00000011476 | 4848 CAMK2D   |
| ENSACAG00000016045 | 4849 TFPT     |
| ENSACAG00000005872 | 4850 KCNQ2    |
| ENSACAG00000003687 | 4851 SLC25A28 |
| ENSACAG00000005254 | 4852 LRRC59   |
| ENSACAG00000005553 | 4853          |
| ENSACAG00000013648 | 4854          |
| ENSACAG00000012788 | 4855 CDC14B   |
| ENSACAG00000011858 | 4856 RIOK2    |
| ENSACAG00000026118 | 4857          |
| ENSACAG00000016199 | 4858 ARHGAP32 |
| ENSACAG00000002531 | 4859 PDCD2    |
| ENSACAG00000014609 | 4860 EYA1     |
| ENSACAG00000012967 | 4861 UBE4B    |
| ENSACAG00000016655 | 4862 DOCK6    |
| ENSACAG00000013745 | 4863 FAM134C  |
| ENSACAG00000016883 | 4864 XPO6     |
| ENSACAG00000009222 | 4865 ITCH     |
| ENSACAG00000001805 | 4866 DCTN5    |
| ENSACAG00000027532 | 4867 PRR12    |
| ENSACAG00000006090 | 4868          |
| ENSACAG00000006306 | 4869 ARMT1    |
| ENSACAG00000013770 | 4870 MRPL21   |

|                    |               |
|--------------------|---------------|
| ENSACAG00000015732 | 4871 TMEM69   |
| ENSACAG00000005520 | 4872 FBXO8    |
| ENSACAG00000007882 | 4873 PGAM5    |
| ENSACAG00000010797 | 4874 C5orf28  |
| ENSACAG00000007154 | 4875 SERPING1 |
| ENSACAG00000001911 | 4876 AKAP11   |
| ENSACAG00000015965 | 4877 FAM210B  |
| ENSACAG00000014238 | 4878 VGLL2    |
| ENSACAG00000000780 | 4879 SPAST    |
| ENSACAG00000000625 | 4880 BORA     |
| ENSACAG00000013380 | 4881 ALDH9A1  |
| ENSACAG00000001690 | 4882          |
| ENSACAG00000014954 | 4883 PWP1     |
| ENSACAG00000016565 | 4884 CDKN3    |
| ENSACAG00000014945 | 4885 GPATCH2  |
| ENSACAG00000002670 | 4886 QSER1    |
| ENSACAG00000002760 | 4887 ZDHHC20  |
| ENSACAG00000010716 | 4888          |
| ENSACAG00000011812 | 4889 HDAC3    |
| ENSACAG00000017796 | 4890 TMEM109  |
| ENSACAG00000016790 | 4891 ARMC1    |
| ENSACAG00000006850 | 4892          |
| ENSACAG00000013334 | 4893          |
| ENSACAG00000027717 | 4894          |
| ENSACAG00000006918 | 4895 ORC5     |
| ENSACAG00000002706 | 4896 EXOSC2   |
| ENSACAG00000009423 | 4897 DERL1    |
| ENSACAG00000014143 | 4898 RPS6KA6  |
| ENSACAG00000007941 | 4899 SATB1    |
| ENSACAG00000003835 | 4900          |
| ENSACAG00000014688 | 4901 SETD9    |
| ENSACAG00000011511 | 4902 RMND5A   |
| ENSACAG00000003842 | 4903 TMEM184C |
| ENSACAG00000005274 | 4904 TIAM2    |
| ENSACAG00000006118 | 4905 ANAPC1   |
| ENSACAG00000012978 | 4906 NDUFA2   |
| ENSACAG00000016527 | 4907 NFYA     |
| ENSACAG00000010032 | 4908          |
| ENSACAG00000019305 | 4909 SNORD22  |
| ENSACAG00000003109 | 4910 WRN      |
| ENSACAG00000007125 | 4911 ZNF609   |
| ENSACAG00000002412 | 4912 NFX1     |

|                    |                |
|--------------------|----------------|
| ENSACAG00000006468 | 4913 GPALPP1   |
| ENSACAG00000002137 | 4914 FAM193A   |
| ENSACAG00000026062 | 4915           |
| ENSACAG00000014203 | 4916 KDM4A     |
| ENSACAG00000000177 | 4917 ERLIN2    |
| ENSACAG00000017621 | 4918 SERPINB12 |
| ENSACAG00000014928 | 4919           |
| ENSACAG00000000242 | 4920 MTOR      |
| ENSACAG00000024591 | 4921           |
| ENSACAG00000003470 | 4922 OAF       |
| ENSACAG00000005381 | 4923           |
| ENSACAG00000000738 | 4924           |
| ENSACAG00000011376 | 4925 SMARCA1   |
| ENSACAG00000026445 | 4926           |
| ENSACAG00000006014 | 4927 COPS7A    |
| ENSACAG00000000790 | 4928 TNS1      |
| ENSACAG00000002829 | 4929 MRS2      |
| ENSACAG00000027152 | 4930           |
| ENSACAG00000015954 | 4931           |
| ENSACAG00000003612 | 4932 NR3C2     |
| ENSACAG00000012487 | 4933 BCL2L13   |
| ENSACAG00000007001 | 4934 CHN2      |
| ENSACAG00000009187 | 4935 EXOC1     |
| ENSACAG00000000406 | 4936 SIPA1L2   |
| ENSACAG00000007413 | 4937 DCUN1D1   |
| ENSACAG00000028739 | 4938 RXRB      |
| ENSACAG00000006150 | 4939 ING4      |
| ENSACAG00000009723 | 4940 PES1      |
| ENSACAG00000003145 | 4941 FERMT1    |
| ENSACAG00000014478 | 4942 MTA3      |
| ENSACAG00000010087 | 4943 ARL4C     |
| ENSACAG00000015543 | 4944           |
| ENSACAG00000009853 | 4945 GMCL1     |
| ENSACAG00000003004 | 4946 C19orf47  |
| ENSACAG00000013692 | 4947 SEC22B    |
| ENSACAG00000017479 | 4948 NCLN      |
| ENSACAG00000005040 | 4949           |
| ENSACAG00000025589 | 4950 DDX23     |
| ENSACAG00000006745 | 4951 USF3      |
| ENSACAG00000002322 | 4952           |
| ENSACAG00000008251 | 4953 LRRC28    |
| ENSACAG00000008430 | 4954 GRB10     |

|                    |                     |
|--------------------|---------------------|
| ENSACAG00000002944 | 4955                |
| ENSACAG00000010946 | 4956 CWF19L2        |
| ENSACAG00000001209 | 4957 DDIT4          |
| ENSACAG00000000298 | 4958 CNST           |
| ENSACAG00000005643 | 4959 C6orf120       |
| ENSACAG00000000029 | 4960 PCGF1          |
| ENSACAG00000016290 | 4961 PIK3R1         |
| ENSACAG00000011591 | 4962 TMEM39B        |
| ENSACAG00000013345 | 4963 TSEN2          |
| ENSACAG00000000039 | 4964 DDX11          |
| ENSACAG00000015860 | 4965 SH3RF1         |
| ENSACAG00000016705 | 4966                |
| ENSACAG00000001636 | 4967 RPAP3          |
| ENSACAG00000009335 | 4968 CLOCK          |
| ENSACAG00000029151 | 4969 PAIP2B         |
| ENSACAG00000000704 | 4970 RFC2           |
| ENSACAG00000010529 | 4971                |
| ENSACAG00000012987 | 4972 TMC06          |
| ENSACAG00000015156 | 4973 DHRS7          |
| ENSACAG00000027616 | 4974 snoMe28S-U3344 |
| ENSACAG00000008830 | 4975 HLCS           |
| ENSACAG00000003856 | 4976 HNRNPUL1       |
| ENSACAG00000011140 | 4977 RASSF9         |
| ENSACAG00000003319 | 4978 PACRG          |
| ENSACAG00000002022 | 4979 DNAJC15        |
| ENSACAG00000014841 | 4980 DYNLT3         |
| ENSACAG00000015688 | 4981 KIF18A         |
| ENSACAG00000005367 | 4982 AAAS           |
| ENSACAG00000016609 | 4983 MCM5           |
| ENSACAG00000016920 | 4984 PHYKPL         |
| ENSACAG00000002011 | 4985 PPP2R3C        |
| ENSACAG00000014417 | 4986 SLC40A1        |
| ENSACAG00000002466 | 4987 ANO6           |
| ENSACAG00000002725 | 4988 RLIM           |
| ENSACAG00000005676 | 4989                |
| ENSACAG00000007417 | 4990 GLT8D1         |
| ENSACAG00000000976 | 4991 LIPT1          |
| ENSACAG00000028468 | 4992 HACD1          |
| ENSACAG00000007139 | 4993 CLP1           |
| ENSACAG00000014900 | 4994 JAM2           |
| ENSACAG00000010993 | 4995 SESN2          |
| ENSACAG00000029303 | 4996 COX20          |

|                    |                |
|--------------------|----------------|
| ENSACAG00000009259 | 4997 UPF2      |
| ENSACAG00000008592 | 4998 ASXL1     |
| ENSACAG00000004756 | 4999 TAF5      |
| ENSACAG00000004319 | 5000 SPG20     |
| ENSACAG00000008446 | 5001 TOX2      |
| ENSACAG00000014907 | 5002 PRDM4     |
| ENSACAG00000003648 | 5003 MCUR1     |
| ENSACAG00000026901 | 5004           |
| ENSACAG00000015840 | 5005 PROSER1   |
| ENSACAG00000007331 | 5006 TRUB2     |
| ENSACAG00000011615 | 5007 KIAA1468  |
| ENSACAG00000016798 | 5008 EIF2B2    |
| ENSACAG00000004410 | 5009           |
| ENSACAG00000004957 | 5010           |
| ENSACAG00000012592 | 5011 SVBP      |
| ENSACAG00000028900 | 5012 RNF151    |
| ENSACAG00000017862 | 5013 NID2      |
| ENSACAG00000002797 | 5014 CMTM4     |
| ENSACAG00000014214 | 5015           |
| ENSACAG00000011029 | 5016 SEC22A    |
| ENSACAG00000002071 | 5017 ELP2      |
| ENSACAG00000015851 | 5018 CKS1B     |
| ENSACAG00000013992 | 5019 CHST13    |
| ENSACAG00000003757 | 5020 TNFSF15   |
| ENSACAG00000001578 | 5021 ISOC1     |
| ENSACAG00000014853 | 5022 ORC3      |
| ENSACAG00000027602 | 5023           |
| ENSACAG00000009903 | 5024           |
| ENSACAG00000012156 | 5025 TRMT10B   |
| ENSACAG00000010800 | 5026 ATAT1     |
| ENSACAG00000005174 | 5027 GALNT16   |
| ENSACAG00000009518 | 5028 GORASP1   |
| ENSACAG00000006021 | 5029 SECISBP2L |
| ENSACAG00000007195 | 5030 GPAA1     |
| ENSACAG00000005640 | 5031           |
| ENSACAG00000007455 | 5032 MCM2      |
| ENSACAG00000006516 | 5033 SLC38A6   |
| ENSACAG00000015502 | 5034 MPP1      |
| ENSACAG00000029115 | 5035 NDFIP2    |
| ENSACAG00000015657 | 5036 IL27RA    |
| ENSACAG00000007764 | 5037 TIMM17B   |
| ENSACAG00000017863 | 5038 RNF125    |



|                    |              |
|--------------------|--------------|
| ENSACAG00000011578 | 5039         |
| ENSACAG00000001864 | 5040 PLA2G4A |
| ENSACAG00000003424 | 5041 UBN2    |
| ENSACAG00000007015 | 5042 EPC1    |
| ENSACAG00000002074 | 5043 TADA2B  |
| ENSACAG00000008537 | 5044 GLA     |
| ENSACAG00000017266 | 5045         |
| ENSACAG00000023274 | 5046         |
| ENSACAG00000027354 | 5047 NUP214  |
| ENSACAG00000004376 | 5048 DUSP16  |
| ENSACAG00000000798 | 5049 WBP4    |
| ENSACAG00000003525 | 5050 CHAC1   |
| ENSACAG00000012285 | 5051 MRPS25  |
| ENSACAG00000004770 | 5052 PBX4    |
| ENSACAG00000007606 | 5053 SETD1A  |
| ENSACAG00000010186 | 5054 SMAD4   |
| ENSACAG00000000608 | 5055 FBXL3   |
| ENSACAG00000001210 | 5056 TTC39C  |
| ENSACAG00000008339 | 5057         |
| ENSACAG00000008854 | 5058 ALG3    |
| ENSACAG00000004872 | 5059 PIK3CA  |
| ENSACAG00000000108 | 5060 SRPR    |
| ENSACAG00000003946 | 5061         |
| ENSACAG00000013045 | 5062 SETBP1  |
| ENSACAG00000003239 | 5063 FAM199X |
| ENSACAG00000001977 | 5064 AGFG2   |
| ENSACAG00000000629 | 5065 PRKCA   |
| ENSACAG00000006992 | 5066 SLC51A  |
| ENSACAG00000001913 | 5067 FAM206A |
| ENSACAG00000004465 | 5068 NDUFB5  |
| ENSACAG00000001643 | 5069 CHAMP1  |
| ENSACAG00000026477 | 5070         |
| ENSACAG00000003935 | 5071 TMX1    |
| ENSACAG00000002898 | 5072 THRA    |
| ENSACAG00000006449 | 5073 THOC3   |
| ENSACAG00000028478 | 5074 MIER3   |
| ENSACAG00000009670 | 5075 CCDC88C |
| ENSACAG00000005784 | 5076 SOBP    |
| ENSACAG00000006368 | 5077 C5orf15 |
| ENSACAG00000010160 | 5078 HMBOX1  |
| ENSACAG00000010236 | 5079 PRKAA1  |
| ENSACAG00000029330 | 5080         |

|                    |               |
|--------------------|---------------|
| ENSACAG00000011834 | 5081 GTPBP6   |
| ENSACAG00000006388 | 5082          |
| ENSACAG00000017564 | 5083 LHPP     |
| ENSACAG00000002820 | 5084 KIAA0907 |
| ENSACAG00000015621 | 5085 SREK1IP1 |
| ENSACAG00000015335 | 5086 IFT22    |
| ENSACAG00000011069 | 5087 OPA1     |
| ENSACAG00000011739 | 5088          |
| ENSACAG00000015026 | 5089 NONO     |
| ENSACAG00000003006 | 5090 SYNJ1    |
| ENSACAG00000014762 | 5091 FBXO7    |
| ENSACAG00000002033 | 5092 COMMD6   |
| ENSACAG00000001040 | 5093 APBA1    |
| ENSACAG00000011809 | 5094 ATP10A   |
| ENSACAG00000013184 | 5095          |
| ENSACAG00000001359 | 5096 ADNP2    |
| ENSACAG00000003170 | 5097 TAF8     |
| ENSACAG00000006875 | 5098 RECQL5   |
| ENSACAG00000016314 | 5099 ARFGEF1  |
| ENSACAG00000016591 | 5100 LPCAT2   |
| ENSACAG00000015438 | 5101 BARD1    |
| ENSACAG00000002342 | 5102 TRMT1L   |
| ENSACAG00000005749 | 5103 PID1     |
| ENSACAG00000006177 | 5104 PHTF2    |
| ENSACAG00000002626 | 5105 PKNOX1   |
| ENSACAG00000012351 | 5106 YARS2    |
| ENSACAG00000017022 | 5107 DNAJB1   |
| ENSACAG00000002367 | 5108          |
| ENSACAG00000003939 | 5109 NAGA     |
| ENSACAG00000002395 | 5110 SH2B3    |
| ENSACAG00000002119 | 5111 EIF2AK3  |
| ENSACAG00000005663 | 5112 NUDT9    |
| ENSACAG00000004825 | 5113 PCNX     |
| ENSACAG00000015272 | 5114 ITFG2    |
| ENSACAG00000008230 | 5115 PRPSAP1  |
| ENSACAG00000005417 | 5116 FBXO36   |
| ENSACAG00000025255 | 5117          |
| ENSACAG00000017745 | 5118 TMEM138  |
| ENSACAG00000002934 | 5119 COQ5     |
| ENSACAG00000016594 | 5120 SECISBP2 |
| ENSACAG00000006538 | 5121 CLUH     |
| ENSACAG00000005779 | 5122          |

|                    |               |
|--------------------|---------------|
| ENSACAG00000001544 | 5123 UBA2     |
| ENSACAG00000004218 | 5124 GRAMD4   |
| ENSACAG00000013740 | 5125          |
| ENSACAG00000014994 | 5126 ADAM10   |
| ENSACAG00000012591 | 5127 NFYC     |
| ENSACAG00000006276 | 5128          |
| ENSACAG00000008772 | 5129 ZSWIM6   |
| ENSACAG00000005280 | 5130 FUCA1    |
| ENSACAG00000001208 | 5131 MCM10    |
| ENSACAG00000013899 | 5132 EIF4E3   |
| ENSACAG00000016800 | 5133 CCDC28A  |
| ENSACAG00000024006 | 5134          |
| ENSACAG00000011556 | 5135 PLK4     |
| ENSACAG00000002415 | 5136 SLC12A2  |
| ENSACAG00000014061 | 5137 APOOL    |
| ENSACAG00000022152 | 5138 C11orf24 |
| ENSACAG00000011462 | 5139 NDUFB4   |
| ENSACAG00000029172 | 5140          |
| ENSACAG00000014803 | 5141 ADCY3    |
| ENSACAG00000015260 | 5142 MED12    |
| ENSACAG00000024280 | 5143          |
| ENSACAG00000002586 | 5144 ITM2C    |
| ENSACAG00000016494 | 5145 LTBP2    |
| ENSACAG00000014970 | 5146 RARS2    |
| ENSACAG00000012606 | 5147 MRPL42   |
| ENSACAG00000003587 | 5148          |
| ENSACAG00000003223 | 5149          |
| ENSACAG00000028998 | 5150          |
| ENSACAG00000006394 | 5151 SIMC1    |
| ENSACAG00000014045 | 5152 RAB20    |
| ENSACAG00000006777 | 5153 NUP43    |
| ENSACAG00000008885 | 5154 ATMIN    |
| ENSACAG00000015971 | 5155          |
| ENSACAG00000024562 | 5156          |
| ENSACAG00000015917 | 5157 FAM98B   |
| ENSACAG00000010711 | 5158 CHMP2A   |
| ENSACAG00000029596 | 5159 DPH6     |
| ENSACAG00000006774 | 5160 RPRD1A   |
| ENSACAG00000004022 | 5161 PMS1     |
| ENSACAG00000001438 | 5162 VAC14    |
| ENSACAG00000025468 | 5163 SNORD12  |
| ENSACAG00000003506 | 5164 STIM1    |

|                    |               |
|--------------------|---------------|
| ENSACAG00000013119 | 5165          |
| ENSACAG00000007116 | 5166 HLTF     |
| ENSACAG00000000872 | 5167 EPHA3    |
| ENSACAG00000013577 | 5168          |
| ENSACAG00000013809 | 5169 FBXO3    |
| ENSACAG00000007025 | 5170          |
| ENSACAG00000007548 | 5171 COMMD2   |
| ENSACAG00000012076 | 5172 NUB1     |
| ENSACAG00000001755 | 5173 WRNIP1   |
| ENSACAG00000010501 | 5174 CHIC2    |
| ENSACAG00000003215 | 5175 PURG     |
| ENSACAG00000001874 | 5176 ABHD6    |
| ENSACAG00000001265 | 5177 MRPL52   |
| ENSACAG00000002241 | 5178          |
| ENSACAG00000015461 | 5179          |
| ENSACAG00000003798 | 5180 MRPL43   |
| ENSACAG00000012794 | 5181 CD302    |
| ENSACAG00000016822 | 5182          |
| ENSACAG00000017131 | 5183 SEC23IP  |
| ENSACAG00000004292 | 5184          |
| ENSACAG00000006805 | 5185 SDCCAG8  |
| ENSACAG00000009851 | 5186 ZBTB20   |
| ENSACAG00000003910 | 5187 BVES     |
| ENSACAG00000017787 | 5188 ZNF593   |
| ENSACAG00000009123 | 5189 C17orf67 |
| ENSACAG00000003186 | 5190 ACADS    |
| ENSACAG00000016575 | 5191 PRAF2    |
| ENSACAG00000018168 | 5192 SNORA43  |
| ENSACAG00000023160 | 5193 SGCA     |
| ENSACAG00000008132 | 5194 ALG6     |
| ENSACAG00000009725 | 5195 DNAH2    |
| ENSACAG00000008494 | 5196 HIVEP1   |
| ENSACAG00000004283 | 5197 UFC1     |
| ENSACAG00000014452 | 5198 LIN7A    |
| ENSACAG00000002138 | 5199          |
| ENSACAG00000014523 | 5200          |
| ENSACAG00000017159 | 5201 WDR11    |
| ENSACAG00000004028 | 5202 TBC1D22A |
| ENSACAG00000017951 | 5203          |
| ENSACAG00000017738 | 5204 CNTLN    |
| ENSACAG00000017195 | 5205          |
| ENSACAG00000013224 | 5206          |

|                    |               |
|--------------------|---------------|
| ENSACAG00000013340 | 5207 RNF14    |
| ENSACAG00000007260 | 5208 LIAS     |
| ENSACAG00000005404 | 5209 CDK2     |
| ENSACAG00000011209 | 5210 QDPR     |
| ENSACAG00000008743 | 5211 PLAGL2   |
| ENSACAG00000011200 | 5212          |
| ENSACAG00000000016 | 5213 PP2D1    |
| ENSACAG00000012562 | 5214 UAP1     |
| ENSACAG00000026084 | 5215 NCAPH2   |
| ENSACAG00000009079 | 5216 INTS10   |
| ENSACAG00000009705 | 5217 DRG2     |
| ENSACAG00000003971 | 5218 WBP2NL   |
| ENSACAG00000020647 | 5219 5S_rRNA  |
| ENSACAG00000017297 | 5220          |
| ENSACAG00000001863 | 5221 CEP68    |
| ENSACAG00000015519 | 5222 CHID1    |
| ENSACAG00000015925 | 5223 TXNRD1   |
| ENSACAG00000005917 | 5224 DHRSX    |
| ENSACAG00000005459 | 5225 SGCZ     |
| ENSACAG00000011093 | 5226 TRIM37   |
| ENSACAG00000008937 | 5227 SEC16A   |
| ENSACAG00000005475 | 5228 CUEDC1   |
| ENSACAG00000028611 | 5229 RNMT     |
| ENSACAG00000000251 | 5230 POLR2J   |
| ENSACAG00000002950 | 5231 TEX30    |
| ENSACAG00000005430 | 5232 SGSM3    |
| ENSACAG00000015400 | 5233 POLR3B   |
| ENSACAG00000006083 | 5234 SESN1    |
| ENSACAG00000016452 | 5235 CDK7     |
| ENSACAG00000016612 | 5236 FAM198B  |
| ENSACAG00000008967 | 5237 TNFAIP1  |
| ENSACAG00000017349 | 5238 ABHD16A  |
| ENSACAG00000028925 | 5239 MLF1     |
| ENSACAG00000028555 | 5240 TMEM241  |
| ENSACAG00000002239 | 5241 WDR60    |
| ENSACAG00000010923 | 5242 C6orf136 |
| ENSACAG00000021055 | 5243 C10orf12 |
| ENSACAG00000003035 | 5244 TRAPPC11 |
| ENSACAG00000000735 | 5245 GPR143   |
| ENSACAG00000012449 | 5246 PEX26    |
| ENSACAG00000008406 | 5247 PALD1    |
| ENSACAG00000013012 | 5248 APAF1    |

|                    |               |
|--------------------|---------------|
| ENSACAG00000012801 | 5249 PTRH2    |
| ENSACAG00000008341 | 5250          |
| ENSACAG00000014164 | 5251 LZTFL1   |
| ENSACAG00000005935 | 5252 ADI1     |
| ENSACAG00000023953 | 5253 LRRN4CL  |
| ENSACAG00000017962 | 5254 KAT2A    |
| ENSACAG00000015106 | 5255 RABGAP1L |
| ENSACAG00000001410 | 5256 PGM5     |
| ENSACAG00000001683 | 5257 CENPJ    |
| ENSACAG00000017422 | 5258 CACNB1   |
| ENSACAG00000003698 | 5259 LOX      |
| ENSACAG00000007732 | 5260 TBC1D8   |
| ENSACAG00000012064 | 5261          |
| ENSACAG00000012657 | 5262          |
| ENSACAG00000012153 | 5263 ITGB6    |
| ENSACAG00000017170 | 5264 POMT2    |
| ENSACAG00000015094 | 5265 SLC35A1  |
| ENSACAG00000009260 | 5266 WEE1     |
| ENSACAG00000010283 | 5267 WWOX     |
| ENSACAG00000006034 | 5268 N4BP1    |
| ENSACAG00000011533 | 5269 PSMG3    |
| ENSACAG00000016848 | 5270 TTPAL    |
| ENSACAG00000009494 | 5271 PPME1    |
| ENSACAG00000009604 | 5272 NEMP1    |
| ENSACAG00000001769 | 5273 RAB3GAP2 |
| ENSACAG00000014978 | 5274 PHF21A   |
| ENSACAG00000013485 | 5275 VDR      |
| ENSACAG00000016009 | 5276 HDDC3    |
| ENSACAG00000003089 | 5277 RRM1     |
| ENSACAG00000028594 | 5278          |
| ENSACAG00000008807 | 5279 INVS     |
| ENSACAG00000014520 | 5280          |
| ENSACAG00000005492 | 5281 EMC8     |
| ENSACAG00000010643 | 5282 MYL1     |
| ENSACAG00000024973 | 5283 PPM1G    |
| ENSACAG00000017917 | 5284 KIAA1715 |
| ENSACAG00000010465 | 5285 FGFR1OP  |
| ENSACAG00000000583 | 5286 TMEM161B |
| ENSACAG00000027956 | 5287          |
| ENSACAG00000000464 | 5288 MYBBP1A  |
| ENSACAG00000006696 | 5289 ZDHHC17  |
| ENSACAG00000005706 | 5290 COMMD1   |

|                    |               |
|--------------------|---------------|
| ENSACAG00000017989 | 5291 LYN      |
| ENSACAG00000015432 | 5292 SETD8    |
| ENSACAG00000014034 | 5293          |
| ENSACAG00000012147 | 5294 NEU1     |
| ENSACAG00000000325 | 5295 LPIN1    |
| ENSACAG00000012216 | 5296 NFE2L2   |
| ENSACAG00000025908 | 5297 FAM217B  |
| ENSACAG00000013237 | 5298 TANC2    |
| ENSACAG00000017093 | 5299 KLHL11   |
| ENSACAG00000007768 | 5300 RBBP8    |
| ENSACAG00000002280 | 5301 TRIT1    |
| ENSACAG00000013284 | 5302 KIAA0825 |
| ENSACAG00000011004 | 5303 CDK19    |
| ENSACAG00000011186 | 5304 RNPEPL1  |
| ENSACAG00000013748 | 5305 ADPRH    |
| ENSACAG00000006603 | 5306 PLEKHG1  |
| ENSACAG00000013765 | 5307 GLB1     |
| ENSACAG00000002973 | 5308          |
| ENSACAG00000011996 | 5309 JADE3    |
| ENSACAG00000003216 | 5310 GTF3A    |
| ENSACAG00000004727 | 5311 CCDC12   |
| ENSACAG00000001046 | 5312 JAM3     |
| ENSACAG00000004164 | 5313 RHOQ     |
| ENSACAG00000024682 | 5314 DNAJC11  |
| ENSACAG00000001939 | 5315 ORAI1    |
| ENSACAG00000004019 | 5316 DMPK     |
| ENSACAG00000005564 | 5317 CEP44    |
| ENSACAG00000000971 | 5318 STK25    |
| ENSACAG00000007395 | 5319 SLC35G1  |
| ENSACAG00000010048 | 5320 MLH1     |
| ENSACAG00000017036 | 5321 NIF3L1   |
| ENSACAG00000010071 | 5322 SH3BP4   |
| ENSACAG00000015362 | 5323 GANAB    |
| ENSACAG00000013360 | 5324 PPARG    |
| ENSACAG00000000850 | 5325 DNAJC13  |
| ENSACAG00000016083 | 5326 POP1     |
| ENSACAG00000028650 | 5327          |
| ENSACAG00000008224 | 5328 ATG9B    |
| ENSACAG00000007885 | 5329 DNAL4    |
| ENSACAG00000015497 | 5330          |
| ENSACAG00000023520 | 5331          |
| ENSACAG00000029340 | 5332          |

|                    |              |
|--------------------|--------------|
| ENSACAG00000003381 | 5333         |
| ENSACAG00000002697 | 5334 SCAMP3  |
| ENSACAG00000019009 | 5335 SNORA79 |
| ENSACAG00000008181 | 5336 PGM1    |
| ENSACAG00000012599 | 5337         |
| ENSACAG00000028782 | 5338         |
| ENSACAG00000025980 | 5339         |
| ENSACAG00000015253 | 5340 SGMS1   |
| ENSACAG00000004079 | 5341 RELB    |
| ENSACAG00000002955 | 5342 GAB1    |
| ENSACAG00000012776 | 5343 IKBKB   |
| ENSACAG00000001707 | 5344 YDJC    |
| ENSACAG00000006343 | 5345 UBN1    |
| ENSACAG00000005264 | 5346 MFSD10  |
| ENSACAG00000004776 | 5347         |
| ENSACAG00000029419 | 5348         |
| ENSACAG00000002796 | 5349 FYTTD1  |
| ENSACAG00000015039 | 5350 CPEB4   |
| ENSACAG00000001520 | 5351 THAP11  |
| ENSACAG00000026164 | 5352 LHFPL4  |
| ENSACAG00000014236 | 5353 FOXN2   |
| ENSACAG00000001343 | 5354 FDX1    |
| ENSACAG00000007875 | 5355 ANAPC15 |
| ENSACAG00000014571 | 5356 NRDE2   |
| ENSACAG00000014447 | 5357 PUS7    |
| ENSACAG00000008220 | 5358 IDH3G   |
| ENSACAG00000001364 | 5359 OPTN    |
| ENSACAG00000000552 | 5360 ATP9B   |
| ENSACAG00000004854 | 5361         |
| ENSACAG00000013515 | 5362 XPC     |
| ENSACAG00000017635 | 5363 EYA3    |
| ENSACAG00000011478 | 5364 TXLNG   |
| ENSACAG00000017242 | 5365 ATE1    |
| ENSACAG00000006216 | 5366 ARHGEF7 |
| ENSACAG00000009873 | 5367 IDH1    |
| ENSACAG00000015510 | 5368 HMBS    |
| ENSACAG00000001914 | 5369 PPTC7   |
| ENSACAG00000010558 | 5370 SIRT1   |
| ENSACAG00000003837 | 5371         |
| ENSACAG00000004460 | 5372 RFXAP   |
| ENSACAG00000003538 | 5373 SIRT5   |
| ENSACAG00000005559 | 5374 RFK     |



|                    |               |
|--------------------|---------------|
| ENSACAG00000007365 | 5375 OGFOD1   |
| ENSACAG00000015304 | 5376          |
| ENSACAG00000001194 | 5377 IRF2BP2  |
| ENSACAG00000010648 | 5378 DDX47    |
| ENSACAG00000014089 | 5379 HYOU1    |
| ENSACAG00000024392 | 5380          |
| ENSACAG00000004687 | 5381 YEATS2   |
| ENSACAG00000007799 | 5382 DYRK3    |
| ENSACAG00000004832 | 5383          |
| ENSACAG00000011981 | 5384          |
| ENSACAG00000012971 | 5385 SNX10    |
| ENSACAG00000002545 | 5386          |
| ENSACAG00000011662 | 5387 KCTD6    |
| ENSACAG00000005041 | 5388 GK5      |
| ENSACAG00000010913 | 5389 NNT      |
| ENSACAG00000012377 | 5390 EDEM1    |
| ENSACAG00000000523 | 5391 ARL13B   |
| ENSACAG00000006680 | 5392 RSPRY1   |
| ENSACAG00000013514 | 5393 CCDC82   |
| ENSACAG00000013140 | 5394 CWC25    |
| ENSACAG00000008556 | 5395 COL4A3BP |
| ENSACAG00000015189 | 5396 VPS39    |
| ENSACAG00000007687 | 5397          |
| ENSACAG00000005128 | 5398 RCC1     |
| ENSACAG00000004999 | 5399 FAM3A    |
| ENSACAG00000028479 | 5400 IFNAR2   |
| ENSACAG00000003290 | 5401 RTCA     |
| ENSACAG00000012584 | 5402 CXorf23  |
| ENSACAG00000003574 | 5403 ERCC4    |
| ENSACAG00000011356 | 5404 TEX264   |
| ENSACAG00000008206 | 5405 ADGRG6   |
| ENSACAG00000007679 | 5406 RNF41    |
| ENSACAG00000009270 | 5407 SMPD2    |
| ENSACAG00000014235 | 5408 EZH1     |
| ENSACAG00000005778 | 5409 DDX41    |
| ENSACAG00000006646 | 5410 BAG2     |
| ENSACAG00000004462 | 5411 SMG9     |
| ENSACAG00000008368 | 5412 TAF10    |
| ENSACAG00000014388 | 5413 CYLD     |
| ENSACAG00000012995 | 5414 PTGR1    |
| ENSACAG00000013679 | 5415 MLX      |
| ENSACAG00000006549 | 5416 SIK2     |

|                    |               |
|--------------------|---------------|
| ENSACAG00000000816 | 5417 CLIP2    |
| ENSACAG00000004151 | 5418 CLSRP    |
| ENSACAG00000025134 | 5419          |
| ENSACAG00000004546 | 5420 FKTN     |
| ENSACAG00000011920 | 5421 CAV3     |
| ENSACAG00000015422 | 5422 BAIAP2   |
| ENSACAG00000005822 | 5423 GOS2     |
| ENSACAG00000007439 | 5424 TBC1D15  |
| ENSACAG00000002766 | 5425          |
| ENSACAG00000016019 | 5426 ARFGEF2  |
| ENSACAG00000023721 | 5427          |
| ENSACAG00000015012 | 5428 ANO10    |
| ENSACAG00000004895 | 5429          |
| ENSACAG00000012611 | 5430 RNF165   |
| ENSACAG00000004912 | 5431 SERAC1   |
| ENSACAG00000013806 | 5432 C15orf40 |
| ENSACAG00000001870 | 5433 MKNK1    |
| ENSACAG00000001605 | 5434 LGALS1   |
| ENSACAG00000000120 | 5435 EI24     |
| ENSACAG00000006194 | 5436 HAGH     |
| ENSACAG00000011305 | 5437 FAM160A2 |
| ENSACAG00000016740 | 5438          |
| ENSACAG00000007030 | 5439 CACNA2D2 |
| ENSACAG00000003191 | 5440 ID4      |
| ENSACAG00000014215 | 5441 NFKB2    |
| ENSACAG00000014162 | 5442          |
| ENSACAG00000012623 | 5443 IRS4     |
| ENSACAG00000007238 | 5444 HIBADH   |
| ENSACAG00000011579 | 5445 SLC35D1  |
| ENSACAG00000007016 | 5446 FAM53C   |
| ENSACAG00000015390 | 5447 AVEN     |
| ENSACAG00000000229 | 5448 SRM      |
| ENSACAG00000009496 | 5449 AR       |
| ENSACAG00000011715 | 5450          |
| ENSACAG00000000744 | 5451 RAB4A    |
| ENSACAG00000001781 | 5452 ATP5S    |
| ENSACAG00000000422 | 5453 GPCPD1   |
| ENSACAG00000002576 | 5454 TBP      |
| ENSACAG00000028749 | 5455 SIVA1    |
| ENSACAG00000015790 | 5456 KIAA0922 |
| ENSACAG00000027952 | 5457          |
| ENSACAG00000015313 | 5458 C22orf23 |

|                     |               |
|---------------------|---------------|
| ENSACAG00000015197  | 5459 SMIM8    |
| ENSACAG00000001529  | 5460 MECR     |
| ENSACAG000000012280 | 5461 TSHZ3    |
| ENSACAG000000022811 | 5462          |
| ENSACAG000000023877 | 5463          |
| ENSACAG00000001519  | 5464 AXIN2    |
| ENSACAG000000003706 | 5465 KLF4     |
| ENSACAG000000010351 | 5466 CCNC     |
| ENSACAG000000009653 | 5467 ZBTB14   |
| ENSACAG000000010023 | 5468 CFAP53   |
| ENSACAG000000008780 | 5469 DYNLRB2  |
| ENSACAG000000015295 | 5470 RIC8B    |
| ENSACAG000000019626 | 5471 5S_rRNA  |
| ENSACAG000000005317 | 5472 IKZF4    |
| ENSACAG000000012127 | 5473 KCNJ2    |
| ENSACAG000000014036 | 5474 SETDB2   |
| ENSACAG000000017920 | 5475 SMARCD2  |
| ENSACAG000000010758 | 5476 SLC39A14 |
| ENSACAG000000020942 | 5477 JRK      |
| ENSACAG000000001885 | 5478 MKKS     |
| ENSACAG000000007777 | 5479          |
| ENSACAG000000022933 | 5480 PTPRCAP  |
| ENSACAG000000014701 | 5481 PM20D2   |
| ENSACAG000000007591 | 5482 MIEF1    |
| ENSACAG000000013378 | 5483 ZMYM6NB  |
| ENSACAG000000008005 | 5484 PHACTR2  |
| ENSACAG000000012525 | 5485 GNL3L    |
| ENSACAG000000013077 | 5486          |
| ENSACAG000000002833 | 5487 MICU2    |
| ENSACAG000000028530 | 5488 AP3S1    |
| ENSACAG000000002124 | 5489 CBL      |
| ENSACAG000000006193 | 5490 CAMSAP2  |
| ENSACAG000000014714 | 5491 SRPX     |
| ENSACAG000000013949 | 5492 FAM126A  |
| ENSACAG000000006364 | 5493 SNRPD1   |
| ENSACAG000000024948 | 5494          |
| ENSACAG000000014313 | 5495 DSTYK    |
| ENSACAG000000005242 | 5496 GNB1     |
| ENSACAG000000005226 | 5497 RIN2     |
| ENSACAG000000009707 | 5498 IGF2     |
| ENSACAG000000008802 | 5499 PXMP4    |
| ENSACAG000000007435 | 5500 PODXL2   |

|                    |              |
|--------------------|--------------|
| ENSACAG00000003886 | 5501 RFC3    |
| ENSACAG00000000513 | 5502         |
| ENSACAG00000015227 | 5503 TMEM135 |
| ENSACAG00000009892 | 5504 TADA3   |
| ENSACAG00000006632 | 5505         |
| ENSACAG00000000726 | 5506 DNAAF5  |
| ENSACAG00000017890 | 5507 FRMD6   |
| ENSACAG00000000083 | 5508 IGFBP5  |
| ENSACAG00000011716 | 5509         |
| ENSACAG00000009917 | 5510 PIKFYVE |
| ENSACAG00000010505 | 5511         |
| ENSACAG00000015149 | 5512 BNIP1   |
| ENSACAG00000010653 | 5513 BEND5   |
| ENSACAG00000011990 | 5514 SPIDR   |
| ENSACAG00000005758 | 5515 RGS12   |
| ENSACAG00000004597 | 5516 DESI1   |
| ENSACAG00000014563 | 5517 PRDM11  |
| ENSACAG00000014449 | 5518 LYRM2   |
| ENSACAG00000029612 | 5519 PLXNA2  |
| ENSACAG00000002232 | 5520 SNX25   |
| ENSACAG00000002121 | 5521 NDUFAF4 |
| ENSACAG00000014660 | 5522 TBC1D19 |
| ENSACAG00000008781 | 5523         |
| ENSACAG00000016166 | 5524 KCTD17  |
| ENSACAG00000004256 | 5525 ZMIZ1   |
| ENSACAG00000002698 | 5526 ECI2    |
| ENSACAG00000004259 | 5527 SOCS5   |
| ENSACAG00000028656 | 5528         |
| ENSACAG00000001324 | 5529 MIPOL1  |
| ENSACAG00000025864 | 5530 IKZF2   |
| ENSACAG00000005714 | 5531 PYM1    |
| ENSACAG00000018574 | 5532 SNORA24 |
| ENSACAG00000016142 | 5533 NIPAL2  |
| ENSACAG00000012130 | 5534 GRN     |
| ENSACAG00000001104 | 5535 ACTC1   |
| ENSACAG00000004742 | 5536 TTC38   |
| ENSACAG00000007948 | 5537 SF3B5   |
| ENSACAG00000014379 | 5538 SLC15A4 |
| ENSACAG00000012239 | 5539 COG3    |
| ENSACAG00000005322 | 5540         |
| ENSACAG00000004838 | 5541 MYO6    |
| ENSACAG00000004190 | 5542 BRD2    |

|                    |               |
|--------------------|---------------|
| ENSACAG00000004859 | 5543 FAM117B  |
| ENSACAG00000016342 | 5544 SEMA3D   |
| ENSACAG00000006793 | 5545 SP2      |
| ENSACAG00000000164 | 5546 WDR20    |
| ENSACAG00000001037 | 5547 NCAPD3   |
| ENSACAG00000000155 | 5548 CHEK1    |
| ENSACAG00000000689 | 5549 GAS6     |
| ENSACAG00000005883 | 5550 TMEM63A  |
| ENSACAG00000017240 | 5551 CMAS     |
| ENSACAG00000009577 | 5552 CEP63    |
| ENSACAG00000016218 | 5553 IFT81    |
| ENSACAG00000003273 | 5554 ORMDL3   |
| ENSACAG00000004040 | 5555 CDCP1    |
| ENSACAG00000003280 | 5556 C11orf49 |
| ENSACAG00000023826 | 5557          |
| ENSACAG00000006087 | 5558 CXXC1    |
| ENSACAG00000001069 | 5559          |
| ENSACAG00000017047 | 5560          |
| ENSACAG00000002463 | 5561 MYBL2    |
| ENSACAG00000029174 | 5562 AGO1     |
| ENSACAG00000011274 | 5563 CDS1     |
| ENSACAG00000008483 | 5564 UHRF1    |
| ENSACAG00000015535 | 5565          |
| ENSACAG00000017039 | 5566 PDRG1    |
| ENSACAG00000011326 | 5567 ATF2     |
| ENSACAG00000010552 | 5568 DVL3     |
| ENSACAG00000011994 | 5569          |
| ENSACAG00000009290 | 5570 RP9      |
| ENSACAG00000010600 | 5571 SCFD2    |
| ENSACAG00000012031 | 5572 CEP97    |
| ENSACAG00000005472 | 5573 PEX6     |
| ENSACAG00000001081 | 5574 LRR1     |
| ENSACAG00000016573 | 5575 VCIPI1   |
| ENSACAG00000011448 | 5576 ATAD2B   |
| ENSACAG00000010974 | 5577 MTMR9    |
| ENSACAG00000014591 | 5578          |
| ENSACAG00000007388 | 5579 GSS      |
| ENSACAG00000013887 | 5580 RRBP1    |
| ENSACAG00000020988 | 5581 SMIM11A  |
| ENSACAG00000007724 | 5582 EIF2D    |
| ENSACAG00000000644 | 5583 PROS1    |
| ENSACAG00000013015 | 5584 ARSK     |

|                    |                |
|--------------------|----------------|
| ENSACAG00000008337 | 5585 KDM4B     |
| ENSACAG00000001893 | 5586           |
| ENSACAG00000007110 | 5587 GIN1      |
| ENSACAG00000005665 | 5588 FAM102B   |
| ENSACAG00000017782 | 5589 H2AFY2    |
| ENSACAG00000010436 | 5590 ECHDC1    |
| ENSACAG00000001448 | 5591 DMTF1     |
| ENSACAG00000026832 | 5592           |
| ENSACAG00000000972 | 5593 TTC9C     |
| ENSACAG00000008205 | 5594 CEP104    |
| ENSACAG00000012917 | 5595           |
| ENSACAG00000001351 | 5596           |
| ENSACAG00000012425 | 5597 NDUFAF3   |
| ENSACAG00000013484 | 5598           |
| ENSACAG00000013695 | 5599 SGCE      |
| ENSACAG00000014138 | 5600 ODF2L     |
| ENSACAG00000001970 | 5601 MAP3K7CL  |
| ENSACAG00000015762 | 5602 VPS37B    |
| ENSACAG00000012142 | 5603           |
| ENSACAG00000003200 | 5604 BRD3      |
| ENSACAG00000028725 | 5605 ZDHHC13   |
| ENSACAG00000008660 | 5606 POFUT1    |
| ENSACAG00000013291 | 5607 ATG2B     |
| ENSACAG00000005183 | 5608 GALE      |
| ENSACAG00000010360 | 5609 RAB11FIP2 |
| ENSACAG00000005447 | 5610 SLC9A3R1  |
| ENSACAG00000002712 | 5611 SLC35F5   |
| ENSACAG00000000012 | 5612 OLFML2A   |
| ENSACAG00000012934 | 5613 VPS50     |
| ENSACAG00000006752 | 5614 NUDT12    |
| ENSACAG00000013390 | 5615 CBX5      |
| ENSACAG00000013905 | 5616 AEN       |
| ENSACAG00000004684 | 5617 PCOLCE2   |
| ENSACAG00000011861 | 5618 PEX14     |
| ENSACAG00000016679 | 5619 KMT2B     |
| ENSACAG00000003709 | 5620 FADD      |
| ENSACAG00000007190 | 5621 ACIN1     |
| ENSACAG00000010474 | 5622 FAM173B   |
| ENSACAG00000003365 | 5623           |
| ENSACAG00000014022 | 5624 ADCY7     |
| ENSACAG00000024693 | 5625           |
| ENSACAG00000013366 | 5626 USP53     |

|                    |               |
|--------------------|---------------|
| ENSACAG00000007900 | 5627 PCGF5    |
| ENSACAG00000013961 | 5628 PIK3C3   |
| ENSACAG00000028662 | 5629 COX19    |
| ENSACAG00000003795 | 5630 B9D2     |
| ENSACAG00000009899 | 5631 SMAD6    |
| ENSACAG00000008008 | 5632 SFXN5    |
| ENSACAG00000022374 | 5633          |
| ENSACAG00000013501 | 5634 MTA1     |
| ENSACAG00000000553 | 5635 UBXN1    |
| ENSACAG00000016493 | 5636 SERINC5  |
| ENSACAG00000014286 | 5637 TPP1     |
| ENSACAG00000010861 | 5638 NBAS     |
| ENSACAG00000003902 | 5639          |
| ENSACAG00000013590 | 5640          |
| ENSACAG00000005963 | 5641 WDR61    |
| ENSACAG00000003943 | 5642 ATG13    |
| ENSACAG00000001061 | 5643 MRPS15   |
| ENSACAG00000004823 | 5644 TMEM181  |
| ENSACAG00000017467 | 5645 PSTK     |
| ENSACAG00000006360 | 5646 KIAA1191 |
| ENSACAG00000004318 | 5647 USP13    |
| ENSACAG00000029526 | 5648          |
| ENSACAG00000016684 | 5649 C6orf89  |
| ENSACAG00000007100 | 5650 ZNF277   |
| ENSACAG00000011940 | 5651 TFB2M    |
| ENSACAG00000001110 | 5652 ISM1     |
| ENSACAG00000010213 | 5653 PTGER4   |
| ENSACAG00000007036 | 5654 OMA1     |
| ENSACAG00000002787 | 5655          |
| ENSACAG00000016533 | 5656 NHLRC3   |
| ENSACAG00000006811 | 5657          |
| ENSACAG00000017867 | 5658 RNF138   |
| ENSACAG00000006004 | 5659 MXD1     |
| ENSACAG00000008332 | 5660 COA7     |
| ENSACAG00000010627 | 5661 TBC1D10B |
| ENSACAG00000003492 | 5662 PDPK1    |
| ENSACAG00000005721 | 5663 RNF170   |
| ENSACAG00000023951 | 5664          |
| ENSACAG00000017945 | 5665          |
| ENSACAG00000002995 | 5666 RNF10    |
| ENSACAG00000012334 | 5667 BAP1     |
| ENSACAG00000014371 | 5668 NADK     |

|                    |                    |
|--------------------|--------------------|
| ENSACAG00000015398 | 5669 KHSRP         |
| ENSACAG00000028274 | 5670 PPP1R1A       |
| ENSACAG00000006962 | 5671 PCYT1A        |
| ENSACAG00000001948 | 5672 BRI3          |
| ENSACAG00000016503 | 5673               |
| ENSACAG00000011102 | 5674 LMBR1         |
| ENSACAG00000000627 | 5675 CCNH          |
| ENSACAG00000005162 | 5676 SLC39A9       |
| ENSACAG00000014806 | 5677               |
| ENSACAG00000003605 | 5678 AK3           |
| ENSACAG00000002960 | 5679               |
| ENSACAG00000013318 | 5680 ABTB2         |
| ENSACAG00000011128 | 5681 PLCG1         |
| ENSACAG00000008466 | 5682 B9D1          |
| ENSACAG00000016214 | 5683 TAF4          |
| ENSACAG00000017696 | 5684 DHX30         |
| ENSACAG00000005611 | 5685 TMEM229B      |
| ENSACAG00000006288 | 5686 GGA3          |
| ENSACAG00000014831 | 5687               |
| ENSACAG00000013123 | 5688 SIPA1L3       |
| ENSACAG00000013811 | 5689               |
| ENSACAG00000012578 | 5690 DBF4B         |
| ENSACAG00000004595 | 5691 TXLNA         |
| ENSACAG00000011597 | 5692 RNF103        |
| ENSACAG00000012823 | 5693 KDM7A         |
| ENSACAG00000017214 | 5694 VIPAS39       |
| ENSACAG00000002867 | 5695 EXOC8         |
| ENSACAG00000017065 | 5696 DOT1L         |
| ENSACAG00000012049 | 5697 ENTPD4        |
| ENSACAG00000012905 | 5698 PLA2G12A      |
| ENSACAG00000006122 | 5699 LIN9          |
| ENSACAG00000000338 | 5700 SPOPL         |
| ENSACAG00000012749 | 5701               |
| ENSACAG00000005683 | 5702 RTN4IP1       |
| ENSACAG00000003015 | 5703 VLDLR         |
| ENSACAG00000008826 | 5704 GTF2I         |
| ENSACAG00000007502 | 5705               |
| ENSACAG00000007216 | 5706 TRIM59        |
| ENSACAG00000027899 | 5707               |
| ENSACAG00000010891 | 5708 ST3GAL6       |
| ENSACAG00000020528 | 5709 aca-mir-29b-2 |
| ENSACAG00000003217 | 5710 R3HCC1L       |



|                    |               |
|--------------------|---------------|
| ENSACAG00000001145 | 5711          |
| ENSACAG00000015550 | 5712 KRIT1    |
| ENSACAG00000000965 | 5713 TASP1    |
| ENSACAG00000001361 | 5714 FEM1B    |
| ENSACAG00000000815 | 5715 SMAD5    |
| ENSACAG00000007008 | 5716          |
| ENSACAG00000010637 | 5717 FAM195B  |
| ENSACAG00000012696 | 5718 RBM14    |
| ENSACAG00000014310 | 5719          |
| ENSACAG00000002004 | 5720 ASAP2    |
| ENSACAG00000024525 | 5721          |
| ENSACAG00000013548 | 5722 ITSN2    |
| ENSACAG00000002933 | 5723 MORN4    |
| ENSACAG00000016005 | 5724 UBE2S    |
| ENSACAG00000000723 | 5725 PSME1    |
| ENSACAG00000004696 | 5726          |
| ENSACAG00000006889 | 5727 MRPL10   |
| ENSACAG00000007148 | 5728 ACSS2    |
| ENSACAG00000015243 | 5729          |
| ENSACAG00000014974 | 5730 THUMPD3  |
| ENSACAG00000017020 | 5731 TGFB3    |
| ENSACAG00000012430 | 5732 CAMSAP1  |
| ENSACAG00000016425 | 5733 COPS5    |
| ENSACAG00000016901 | 5734 FLRT3    |
| ENSACAG00000010727 | 5735 KANSL1L  |
| ENSACAG00000004363 | 5736 CREBL2   |
| ENSACAG00000005933 | 5737 DOK3     |
| ENSACAG00000008373 | 5738 CRK      |
| ENSACAG00000007381 | 5739 ZFHX2    |
| ENSACAG00000011989 | 5740 KIAA1109 |
| ENSACAG00000015832 | 5741          |
| ENSACAG00000002542 | 5742 EDEM3    |
| ENSACAG00000006337 | 5743          |
| ENSACAG00000017481 | 5744 STK17A   |
| ENSACAG00000007151 | 5745 YPEL4    |
| ENSACAG00000016306 | 5746 RNF168   |
| ENSACAG00000010646 | 5747 USE1     |
| ENSACAG00000014155 | 5748 ACTR5    |
| ENSACAG00000002358 | 5749 UFL1     |
| ENSACAG00000025450 | 5750 OXLD1    |
| ENSACAG00000015809 | 5751 FBXO38   |
| ENSACAG00000002107 | 5752 MTMR6    |

|                    |               |
|--------------------|---------------|
| ENSACAG00000000921 | 5753 MOXD1    |
| ENSACAG00000011932 | 5754 ABHD14A  |
| ENSACAG00000016170 | 5755 RNF219   |
| ENSACAG00000002746 | 5756 TCP11L1  |
| ENSACAG00000010144 | 5757 DNTTIP1  |
| ENSACAG00000013109 | 5758 FAM20B   |
| ENSACAG00000005688 | 5759 MXD3     |
| ENSACAG00000014069 | 5760 SLC25A38 |
| ENSACAG00000017447 | 5761 PHC1     |
| ENSACAG00000029540 | 5762 PRRG4    |
| ENSACAG00000016893 | 5763          |
| ENSACAG00000007020 | 5764 RELL1    |
| ENSACAG00000014000 | 5765 CCDC150  |
| ENSACAG00000001551 | 5766 TOP3B    |
| ENSACAG00000009980 | 5767 POLH     |
| ENSACAG00000001541 | 5768 ACO1     |
| ENSACAG00000003797 | 5769 CUTC     |
| ENSACAG00000018877 | 5770 SNORD58  |
| ENSACAG00000003537 | 5771 ZNF462   |
| ENSACAG00000015774 | 5772 HSPA2    |
| ENSACAG00000015915 | 5773          |
| ENSACAG00000013325 | 5774 EVL      |
| ENSACAG00000003172 | 5775 ZCRB1    |
| ENSACAG00000009167 | 5776 SPSB1    |
| ENSACAG00000012596 | 5777 SLC22A5  |
| ENSACAG00000008083 | 5778 APH1A    |
| ENSACAG00000008179 | 5779 KSR1     |
| ENSACAG00000005293 | 5780 CHRNA1   |
| ENSACAG00000007522 | 5781 MAP3K8   |
| ENSACAG00000008812 | 5782 C18orf54 |
| ENSACAG00000003849 | 5783 CCDC97   |
| ENSACAG00000002218 | 5784 SLC12A7  |
| ENSACAG00000016578 | 5785 DRAM1    |
| ENSACAG00000001608 | 5786 ZNF644   |
| ENSACAG00000018129 | 5787 SNORD29  |
| ENSACAG00000003769 | 5788 NEB      |
| ENSACAG00000000065 | 5789 TMEM86A  |
| ENSACAG00000015050 | 5790          |
| ENSACAG00000013100 | 5791 ATG9A    |
| ENSACAG00000000953 | 5792 FKBP14   |
| ENSACAG00000007269 | 5793 DMD      |
| ENSACAG00000008093 | 5794 PEX3     |

|                    |                |
|--------------------|----------------|
| ENSACAG00000014326 | 5795           |
| ENSACAG00000002633 | 5796           |
| ENSACAG00000029434 | 5797           |
| ENSACAG00000003742 | 5798 LRRC8A    |
| ENSACAG00000009373 | 5799 NUDT14    |
| ENSACAG00000007039 | 5800           |
| ENSACAG00000004831 | 5801 TULP4     |
| ENSACAG00000013551 | 5802 PEPD      |
| ENSACAG00000029238 | 5803           |
| ENSACAG00000017923 | 5804 CTTNBP2NL |
| ENSACAG00000009147 | 5805 HEXB      |
| ENSACAG00000005224 | 5806 ITPRIP    |
| ENSACAG00000015029 | 5807 MED22     |
| ENSACAG00000011664 | 5808           |
| ENSACAG00000000063 | 5809 UEVLD     |
| ENSACAG00000011003 | 5810           |
| ENSACAG00000012769 | 5811 ANKMY2    |
| ENSACAG00000022375 | 5812           |
| ENSACAG00000009919 | 5813 ERCC3     |
| ENSACAG00000011773 | 5814           |
| ENSACAG00000029374 | 5815           |
| ENSACAG00000008926 | 5816 UBE2E1    |
| ENSACAG00000008992 | 5817 LEPROT    |
| ENSACAG00000008242 | 5818 RPS6KB2   |
| ENSACAG00000023624 | 5819           |
| ENSACAG00000029359 | 5820 DPCD      |
| ENSACAG00000001680 | 5821 TCEANC    |
| ENSACAG00000010353 | 5822 CCDC125   |
| ENSACAG00000028177 | 5823           |
| ENSACAG00000016141 | 5824 STEAP3    |
| ENSACAG00000003953 | 5825 CCNE2     |
| ENSACAG00000002832 | 5826 EAF1      |
| ENSACAG00000007103 | 5827 EHD3      |
| ENSACAG00000008271 | 5828 PAPSS1    |
| ENSACAG00000014110 | 5829 MRE11A    |
| ENSACAG00000011370 | 5830           |
| ENSACAG00000002256 | 5831           |
| ENSACAG00000014698 | 5832 MAZ       |
| ENSACAG00000013261 | 5833 USP19     |
| ENSACAG00000001592 | 5834 ANKS1A    |
| ENSACAG00000014916 | 5835 PRKAR2B   |
| ENSACAG00000017122 | 5836 INPP5B    |

|                    |               |
|--------------------|---------------|
| ENSACAG00000010168 | 5837 ITGB5    |
| ENSACAG00000011249 | 5838 ARAF     |
| ENSACAG00000000908 | 5839          |
| ENSACAG00000014809 | 5840 SHQ1     |
| ENSACAG00000011973 | 5841 BLMH     |
| ENSACAG00000014198 | 5842 MGME1    |
| ENSACAG00000013186 | 5843          |
| ENSACAG00000008789 | 5844 AK4      |
| ENSACAG00000012964 | 5845 DCAF12   |
| ENSACAG00000014749 | 5846 IFNAR1   |
| ENSACAG00000012677 | 5847 TAZ      |
| ENSACAG00000004995 | 5848          |
| ENSACAG00000017880 | 5849 GAREM    |
| ENSACAG00000017098 | 5850 MCMBP    |
| ENSACAG00000009655 | 5851 CPSF1    |
| ENSACAG00000012991 | 5852 NPHP1    |
| ENSACAG00000006726 | 5853          |
| ENSACAG00000002073 | 5854 RAB3GAP1 |
| ENSACAG00000013023 | 5855 CENPC    |
| ENSACAG00000006593 | 5856 SIX4     |
| ENSACAG00000013509 | 5857 DHX8     |
| ENSACAG00000010957 | 5858 ZBTB49   |
| ENSACAG00000006286 | 5859 ZNF281   |
| ENSACAG00000003816 | 5860 MYLIP    |
| ENSACAG00000006609 | 5861 SPICE1   |
| ENSACAG00000017079 | 5862 COX14    |
| ENSACAG00000016660 | 5863 WSB2     |
| ENSACAG00000027822 | 5864 TRMT112  |
| ENSACAG00000002556 | 5865 SLC25A1  |
| ENSACAG00000000150 | 5866 RSNB1    |
| ENSACAG00000010842 | 5867 HELQ     |
| ENSACAG00000012363 | 5868 EEF2K    |
| ENSACAG00000009583 | 5869 SIRT2    |
| ENSACAG00000001327 | 5870 OSBPL1A  |
| ENSACAG00000007754 | 5871 YTHDC2   |
| ENSACAG00000017204 | 5872 CAMSAP3  |
| ENSACAG00000002741 | 5873 WDR4     |
| ENSACAG00000017050 | 5874 AP1S2    |
| ENSACAG00000023313 | 5875          |
| ENSACAG00000014377 | 5876 ATXN10   |
| ENSACAG00000013450 | 5877 SMIM12   |
| ENSACAG00000014758 | 5878 THADA    |

|                    |              |
|--------------------|--------------|
| ENSACAG00000009346 | 5879 HTATSF1 |
| ENSACAG00000016571 | 5880         |
| ENSACAG00000009246 | 5881 MYOM1   |
| ENSACAG00000004113 | 5882 DMXL1   |
| ENSACAG00000006799 | 5883 STYX    |
| ENSACAG00000016399 | 5884         |
| ENSACAG00000000545 | 5885 THSD7B  |
| ENSACAG00000006133 | 5886 GRK6    |
| ENSACAG00000028084 | 5887         |
| ENSACAG00000029309 | 5888 SLC35B4 |
| ENSACAG00000004467 | 5889 CCM2    |
| ENSACAG00000017690 | 5890 ELMO1   |
| ENSACAG00000024584 | 5891         |
| ENSACAG00000009124 | 5892 DGKE    |
| ENSACAG00000008766 | 5893 NDC80   |
| ENSACAG00000005031 | 5894 KLHL12  |
| ENSACAG00000028809 | 5895 NUDCD2  |
| ENSACAG00000007908 | 5896 SENP5   |
| ENSACAG00000017693 | 5897 RIPK1   |
| ENSACAG00000000718 | 5898 PHF2    |
| ENSACAG00000006403 | 5899 ZWINT   |
| ENSACAG00000016008 | 5900 SGPP1   |
| ENSACAG00000013859 | 5901         |
| ENSACAG00000017320 | 5902 SOX5    |
| ENSACAG00000007720 | 5903 TRMU    |
| ENSACAG00000012069 | 5904 MRPL1   |
| ENSACAG00000014366 | 5905 BACH2   |
| ENSACAG00000000171 | 5906 ZNF839  |
| ENSACAG00000011703 | 5907         |
| ENSACAG00000012664 | 5908 UNC50   |
| ENSACAG00000017719 | 5909         |
| ENSACAG00000002812 | 5910 CMTM3   |
| ENSACAG00000002979 | 5911 GRIK4   |
| ENSACAG00000007091 | 5912 ATPAF1  |
| ENSACAG00000022814 | 5913         |
| ENSACAG00000005635 | 5914 FBXO5   |
| ENSACAG00000002277 | 5915 C6orf62 |
| ENSACAG00000006181 | 5916 RPS6KC1 |
| ENSACAG00000013000 | 5917 UBAP1   |
| ENSACAG00000006533 | 5918 TRMT5   |
| ENSACAG00000002899 | 5919 ALDH7A1 |
| ENSACAG00000000058 | 5920 SAAL1   |

|                    |               |
|--------------------|---------------|
| ENSACAG00000015873 | 5921 SGTB     |
| ENSACAG00000011759 | 5922          |
| ENSACAG00000014237 | 5923 PELI2    |
| ENSACAG00000010470 | 5924 OSGIN1   |
| ENSACAG00000006081 | 5925 SIGMAR1  |
| ENSACAG00000012548 | 5926          |
| ENSACAG00000027493 | 5927          |
| ENSACAG00000009495 | 5928 CREG1    |
| ENSACAG00000014043 | 5929          |
| ENSACAG00000009065 | 5930 NUDT1    |
| ENSACAG00000011548 | 5931 PHKG2    |
| ENSACAG00000013339 | 5932 CDC20    |
| ENSACAG00000001109 | 5933 KLHDC2   |
| ENSACAG00000000153 | 5934 PHTF1    |
| ENSACAG00000008044 | 5935 WFDC1    |
| ENSACAG00000008126 | 5936 LONRF2   |
| ENSACAG00000001469 | 5937 CCDC90B  |
| ENSACAG00000000831 | 5938 KCNAB1   |
| ENSACAG00000012811 | 5939 RASAL2   |
| ENSACAG00000022067 | 5940 AEBP1    |
| ENSACAG00000016610 | 5941 AREL1    |
| ENSACAG00000000996 | 5942 DTX2     |
| ENSACAG00000014822 | 5943 TMEM53   |
| ENSACAG00000010870 | 5944 AP3D1    |
| ENSACAG00000014719 | 5945 KIAA0586 |
| ENSACAG00000016416 | 5946 AKTIP    |
| ENSACAG00000004966 | 5947 SLC35B1  |
| ENSACAG00000001637 | 5948 TMEM120A |
| ENSACAG00000016079 | 5949 C5orf45  |
| ENSACAG00000002782 | 5950 ERMARD   |
| ENSACAG00000014518 | 5951 MGST1    |
| ENSACAG00000013308 | 5952 ARSG     |
| ENSACAG00000002269 | 5953 C2orf54  |
| ENSACAG00000014232 | 5954 RBBP5    |
| ENSACAG00000007970 | 5955 DROSHA   |
| ENSACAG00000000730 | 5956 RHOT2    |
| ENSACAG00000009744 | 5957          |
| ENSACAG00000011808 | 5958 STRN4    |
| ENSACAG00000009998 | 5959 JMJD8    |
| ENSACAG00000016763 | 5960          |
| ENSACAG00000008284 | 5961 TMEM214  |
| ENSACAG00000013090 | 5962 METTL1   |

|                     |               |
|---------------------|---------------|
| ENSACAG00000028892  | 5963 TOR1AIP1 |
| ENSACAG00000013988  | 5964 RPAP1    |
| ENSACAG00000001934  | 5965 ZRANB3   |
| ENSACAG000000015680 | 5966          |
| ENSACAG00000001968  | 5967 PAK1     |
| ENSACAG00000009685  | 5968 SUPV3L1  |
| ENSACAG000000014818 | 5969 CDC25B   |
| ENSACAG00000003991  | 5970 USP8     |
| ENSACAG00000008747  | 5971 TM9SF4   |
| ENSACAG000000011076 | 5972 LZTS2    |
| ENSACAG00000002880  | 5973 TWF1     |
| ENSACAG00000008601  | 5974 KIF3B    |
| ENSACAG000000016570 | 5975 ETV7     |
| ENSACAG000000017748 | 5976 HP1BP3   |
| ENSACAG00000005215  | 5977 XPNPEP3  |
| ENSACAG000000010851 | 5978 RTKN2    |
| ENSACAG00000009052  | 5979 COMMD3   |
| ENSACAG000000016390 | 5980 ABR      |
| ENSACAG00000005969  | 5981 MLF2     |
| ENSACAG000000014566 | 5982 LIG4     |
| ENSACAG00000002675  | 5983 MARCH6   |
| ENSACAG000000014195 | 5984 KMT2C    |
| ENSACAG00000006107  | 5985 ARMC5    |
| ENSACAG00000005642  | 5986 DCTN1    |
| ENSACAG000000010867 | 5987 PAIP1    |
| ENSACAG000000014713 | 5988 METTL25  |
| ENSACAG000000014391 | 5989 CASP8AP2 |
| ENSACAG000000015445 | 5990 KLHL20   |
| ENSACAG00000008611  | 5991 CTR9     |
| ENSACAG000000029631 | 5992 BCL2L11  |
| ENSACAG00000004431  | 5993          |
| ENSACAG000000014406 | 5994 B4GALT2  |
| ENSACAG00000005645  | 5995 SYNE1    |
| ENSACAG00000002006  | 5996 HVCN1    |
| ENSACAG000000015997 | 5997 CSTF1    |
| ENSACAG000000029292 | 5998 OSTM1    |
| ENSACAG000000017865 | 5999          |
| ENSACAG00000005391  | 6000 UIMC1    |
| ENSACAG00000008552  | 6001          |
| ENSACAG000000016238 | 6002 RBM38    |
| ENSACAG000000000190 | 6003 ETFA     |
| ENSACAG000000000239 | 6004          |

|                    |               |
|--------------------|---------------|
| ENSACAG00000009948 | 6005 MCCC2    |
| ENSACAG00000010875 | 6006          |
| ENSACAG00000015418 | 6007 ADRB2    |
| ENSACAG00000014490 | 6008 RPA1     |
| ENSACAG00000007440 | 6009 AMT      |
| ENSACAG00000015177 | 6010 HEATR5A  |
| ENSACAG00000016057 | 6011 HRSP12   |
| ENSACAG00000009749 | 6012 SLCO2A1  |
| ENSACAG00000013148 | 6013 SRA1     |
| ENSACAG00000006235 | 6014 DDX20    |
| ENSACAG00000003858 | 6015 MED7     |
| ENSACAG00000011764 | 6016 SLC35E1  |
| ENSACAG00000024798 | 6017 MBD6     |
| ENSACAG00000000378 | 6018 SCAP     |
| ENSACAG00000000189 | 6019 RPUSD4   |
| ENSACAG00000011880 | 6020 RPP14    |
| ENSACAG00000015962 | 6021 WDR73    |
| ENSACAG00000025322 | 6022          |
| ENSACAG00000003130 | 6023 USP12    |
| ENSACAG00000005285 | 6024 FAM50A   |
| ENSACAG00000011368 | 6025          |
| ENSACAG00000015527 | 6026          |
| ENSACAG00000003799 | 6027 SIX2     |
| ENSACAG00000017271 | 6028 MEAF6    |
| ENSACAG00000006657 | 6029 PLOD2    |
| ENSACAG00000002014 | 6030 ARHGAP17 |
| ENSACAG00000005862 | 6031 FAM63A   |
| ENSACAG00000028484 | 6032 E2F4     |
| ENSACAG00000007651 | 6033 FBXL19   |
| ENSACAG00000010420 | 6034          |
| ENSACAG00000012692 | 6035 MGAT4A   |
| ENSACAG00000007239 | 6036          |
| ENSACAG00000014703 | 6037 MAP3K1   |
| ENSACAG00000011685 | 6038 ERCC6    |
| ENSACAG00000014080 | 6039 NTN4     |
| ENSACAG00000016905 | 6040 ABL1     |
| ENSACAG00000017394 | 6041 TOM1L1   |
| ENSACAG00000008170 | 6042 SLC2A13  |
| ENSACAG00000009311 | 6043 EFEMP2   |
| ENSACAG00000010180 | 6044          |
| ENSACAG00000011460 | 6045 ZHX3     |
| ENSACAG00000003508 | 6046 RNF19B   |



|                    |                |
|--------------------|----------------|
| ENSACAG00000012244 | 6047 FGFR1OP2  |
| ENSACAG00000013704 | 6048 EGLN2     |
| ENSACAG00000002227 | 6049 RAB33B    |
| ENSACAG00000011713 | 6050 RNF216    |
| ENSACAG00000012235 | 6051 PIGS      |
| ENSACAG00000025536 | 6052           |
| ENSACAG00000006870 | 6053 NR6A1     |
| ENSACAG00000004206 | 6054           |
| ENSACAG00000028950 | 6055 PINX1     |
| ENSACAG00000017010 | 6056 RRAGC     |
| ENSACAG00000001889 | 6057 MAP4K5    |
| ENSACAG00000016681 | 6058 TRIM55    |
| ENSACAG00000004374 | 6059 IPMK      |
| ENSACAG00000010215 | 6060 LRRC45    |
| ENSACAG00000029548 | 6061           |
| ENSACAG00000010897 | 6062 TMEM140   |
| ENSACAG00000006933 | 6063 FRRS1L    |
| ENSACAG00000006010 | 6064 HIST2H2AB |
| ENSACAG00000013783 | 6065 LMO2      |
| ENSACAG00000025324 | 6066           |
| ENSACAG00000001402 | 6067 MAPK1     |
| ENSACAG00000017471 | 6068 ACADSB    |
| ENSACAG00000001384 | 6069           |
| ENSACAG00000002909 | 6070 KDELC1    |
| ENSACAG00000002344 | 6071 GPR137B   |
| ENSACAG00000011515 | 6072 TBCB      |
| ENSACAG00000010658 | 6073 HBM       |
| ENSACAG00000008621 | 6074           |
| ENSACAG00000000802 | 6075 USP15     |
| ENSACAG00000002488 | 6076 ATG16L2   |
| ENSACAG00000005414 | 6077 E2F7      |
| ENSACAG00000013047 | 6078 TRAPPC3   |
| ENSACAG00000011457 | 6079 MAFK      |
| ENSACAG00000009029 | 6080 FLNC      |
| ENSACAG00000011997 | 6081 CERS2     |
| ENSACAG00000015993 | 6082 ATG4D     |
| ENSACAG00000007747 | 6083 FANCD2    |
| ENSACAG00000008564 | 6084 GLE1      |
| ENSACAG00000004897 | 6085 KIAA1614  |
| ENSACAG00000003131 | 6086 RPRD2     |
| ENSACAG00000015364 | 6087           |
| ENSACAG00000012542 | 6088 MICAL3    |

|                    |               |
|--------------------|---------------|
| ENSACAG00000007523 | 6089 GMPPB    |
| ENSACAG00000017969 | 6090 ATP6V1H  |
| ENSACAG00000011355 | 6091 MRPS33   |
| ENSACAG00000017604 | 6092 COPG2    |
| ENSACAG00000016634 | 6093 CHMP7    |
| ENSACAG00000017041 | 6094 HSPBP1   |
| ENSACAG00000005540 | 6095 SSX2IP   |
| ENSACAG00000025074 | 6096 TMEM263  |
| ENSACAG00000001722 | 6097 KNTC1    |
| ENSACAG00000014858 | 6098 TTYH2    |
| ENSACAG00000017007 | 6099 SCAMP2   |
| ENSACAG00000014521 | 6100 EIF2AK4  |
| ENSACAG00000003076 | 6101 TARS2    |
| ENSACAG00000005457 | 6102 FBXO28   |
| ENSACAG00000008754 | 6103 SNX27    |
| ENSACAG00000003421 | 6104 MBD5     |
| ENSACAG00000009141 | 6105 RIN3     |
| ENSACAG00000017756 | 6106          |
| ENSACAG00000011609 | 6107 SLC35E2B |
| ENSACAG00000012408 | 6108 ARL5A    |
| ENSACAG00000028717 | 6109 RAB3B    |
| ENSACAG00000002288 | 6110 SCOC     |
| ENSACAG00000009173 | 6111 HGSNAT   |
| ENSACAG00000003284 | 6112 KDM1B    |
| ENSACAG00000003064 | 6113 TNFRSF19 |
| ENSACAG00000010566 | 6114 LANCL1   |
| ENSACAG00000000594 | 6115          |
| ENSACAG00000001085 | 6116 PRELID3B |
| ENSACAG00000013072 | 6117          |
| ENSACAG00000021627 | 6118 SNORD78  |
| ENSACAG00000015569 | 6119 APPL2    |
| ENSACAG00000003581 | 6120 APTX     |
| ENSACAG00000006335 | 6121 CPEB3    |
| ENSACAG00000007358 | 6122 ULK1     |
| ENSACAG00000001542 | 6123          |
| ENSACAG00000025475 | 6124          |
| ENSACAG00000017163 | 6125 C17orf53 |
| ENSACAG00000013163 | 6126 ANKZF1   |
| ENSACAG00000013197 | 6127 CEP192   |
| ENSACAG00000027451 | 6128 FBXO22   |
| ENSACAG00000004658 | 6129          |
| ENSACAG00000008491 | 6130 B3GAT2   |

|                     |               |
|---------------------|---------------|
| ENSACAG00000005943  | 6131 STIL     |
| ENSACAG00000000300  | 6132 SCCPDH   |
| ENSACAG00000005871  | 6133 SIN3A    |
| ENSACAG00000001067  | 6134 QPCT     |
| ENSACAG000000012451 | 6135 DSEL     |
| ENSACAG00000009086  | 6136 ALG12    |
| ENSACAG000000003919 | 6137 ATXN1    |
| ENSACAG000000008495 | 6138 FSD1L    |
| ENSACAG000000020304 | 6139 snoR38   |
| ENSACAG000000009459 | 6140 ZBTB41   |
| ENSACAG000000015810 | 6141          |
| ENSACAG000000021120 | 6142 LRRC8D   |
| ENSACAG000000022421 | 6143          |
| ENSACAG000000013835 | 6144 CENPA    |
| ENSACAG000000009109 | 6145 GATA3    |
| ENSACAG000000004833 | 6146 PPFIA4   |
| ENSACAG000000001440 | 6147          |
| ENSACAG000000028952 | 6148          |
| ENSACAG000000000152 | 6149 TAF1B    |
| ENSACAG000000017741 | 6150 TMEM216  |
| ENSACAG000000006493 | 6151 SLC25A19 |
| ENSACAG000000005674 | 6152          |
| ENSACAG000000012663 | 6153 CACNA2D1 |
| ENSACAG000000007219 | 6154 PLCD3    |
| ENSACAG000000010492 | 6155 PCYT2    |
| ENSACAG000000017203 | 6156 YRDC     |
| ENSACAG000000015695 | 6157 PRPH     |
| ENSACAG000000001615 | 6158 IAH1     |
| ENSACAG000000004095 | 6159 INO80D   |
| ENSACAG000000006185 | 6160          |
| ENSACAG000000017620 | 6161          |
| ENSACAG000000003608 | 6162 SERHL2   |
| ENSACAG000000002615 | 6163          |
| ENSACAG000000012492 | 6164 SLC41A1  |
| ENSACAG000000005331 | 6165 ZC3H7A   |
| ENSACAG000000011726 | 6166          |
| ENSACAG000000014807 | 6167 LACTB2   |
| ENSACAG000000003771 | 6168 APCDD1   |
| ENSACAG000000000140 | 6169 KCNK9    |
| ENSACAG000000012151 | 6170 ABL2     |
| ENSACAG000000011415 | 6171 NDRG2    |
| ENSACAG000000006884 | 6172 ADPGK    |

|                    |              |
|--------------------|--------------|
| ENSACAG00000013007 | 6173 SLC4A4  |
| ENSACAG00000007330 | 6174 STARD4  |
| ENSACAG00000001369 | 6175 RANBP10 |
| ENSACAG00000017101 | 6176         |
| ENSACAG00000013337 | 6177 NEDD1   |
| ENSACAG00000008797 | 6178 RNF141  |
| ENSACAG00000006806 | 6179 RSRC1   |
| ENSACAG00000014987 | 6180         |
| ENSACAG00000005685 | 6181 TMED5   |
| ENSACAG00000004879 | 6182 SPOP    |
| ENSACAG00000006939 | 6183 NISCH   |
| ENSACAG00000012264 | 6184 TOR3A   |
| ENSACAG00000016403 | 6185 CSPP1   |
| ENSACAG00000009812 | 6186 POFUT2  |
| ENSACAG00000008892 | 6187 SLC35B3 |
| ENSACAG00000003945 | 6188         |
| ENSACAG00000015096 | 6189 NAPB    |
| ENSACAG00000012793 | 6190 KIF3A   |
| ENSACAG00000018752 | 6191 SNORA50 |
| ENSACAG00000003023 | 6192 LRBA    |
| ENSACAG00000001373 | 6193 PDC     |
| ENSACAG00000016892 | 6194         |
| ENSACAG00000009333 | 6195 FLII    |
| ENSACAG00000020834 | 6196 5S_rRNA |
| ENSACAG00000010147 | 6197 DCXR    |
| ENSACAG00000014947 | 6198 TCF25   |
| ENSACAG00000014277 | 6199 TCF12   |
| ENSACAG00000009388 | 6200 RFTN2   |
| ENSACAG00000005145 | 6201 SUSD6   |
| ENSACAG00000002993 | 6202 USP49   |
| ENSACAG00000005532 | 6203 RGS17   |
| ENSACAG00000008421 | 6204 TYK2    |
| ENSACAG00000012219 | 6205 NUDT16  |
| ENSACAG00000002577 | 6206 GGNBP2  |
| ENSACAG00000016650 | 6207 EBP     |
| ENSACAG00000013271 | 6208 VMA21   |
| ENSACAG00000005628 | 6209         |
| ENSACAG00000013828 | 6210 SPRYD7  |
| ENSACAG00000001713 | 6211 CASP10  |
| ENSACAG00000009844 | 6212 ZWILCH  |
| ENSACAG00000005999 | 6213 SGCB    |
| ENSACAG00000014298 | 6214 DHX35   |

|                    |                |
|--------------------|----------------|
| ENSACAG00000014031 | 6215 COQ9      |
| ENSACAG00000000637 | 6216 BSCL2     |
| ENSACAG00000021191 | 6217 SNORA25   |
| ENSACAG00000002971 | 6218 RNF6      |
| ENSACAG00000000199 | 6219 TARSL2    |
| ENSACAG00000004951 | 6220 MED6      |
| ENSACAG00000014292 | 6221 FZD10     |
| ENSACAG00000027865 | 6222           |
| ENSACAG00000001080 | 6223 TRERF1    |
| ENSACAG00000008811 | 6224 DPM3      |
| ENSACAG00000001835 | 6225 GKAP1     |
| ENSACAG00000005696 | 6226 HENMT1    |
| ENSACAG00000007547 | 6227 GABARAPL2 |
| ENSACAG00000008107 | 6228 ZFYVE9    |
| ENSACAG00000008137 | 6229 RNF157    |
| ENSACAG00000006759 | 6230 CTU2      |
| ENSACAG00000006255 | 6231 TMEM60    |
| ENSACAG00000016819 | 6232 ARFGEF3   |
| ENSACAG00000000407 | 6233 KIF16B    |
| ENSACAG00000009182 | 6234 CRYBG3    |
| ENSACAG00000016697 | 6235           |
| ENSACAG00000015805 | 6236           |
| ENSACAG00000010028 | 6237 SOX13     |
| ENSACAG00000013535 | 6238 PTPRF     |
| ENSACAG00000001729 | 6239 PSKH1     |
| ENSACAG00000004156 | 6240 SAP30L    |
| ENSACAG00000006168 | 6241 RNF44     |
| ENSACAG00000015498 | 6242 GATAD1    |
| ENSACAG00000015164 | 6243 CREBRF    |
| ENSACAG00000002351 | 6244           |
| ENSACAG00000015807 | 6245 CDAN1     |
| ENSACAG00000002333 | 6246 PIK3R4    |
| ENSACAG00000009011 | 6247 GFM2      |
| ENSACAG00000006441 | 6248 MRPS7     |
| ENSACAG00000004916 | 6249 CALHM2    |
| ENSACAG00000013523 | 6250 MRPL19    |
| ENSACAG00000013636 | 6251 PACS2     |
| ENSACAG00000017113 | 6252 ANGEL1    |
| ENSACAG00000016778 | 6253 FITM2     |
| ENSACAG00000022022 | 6254           |
| ENSACAG00000006840 | 6255 LATS1     |
| ENSACAG00000012307 | 6256           |

|                    |               |
|--------------------|---------------|
| ENSACAG00000009354 | 6257          |
| ENSACAG00000017988 | 6258 TGS1     |
| ENSACAG00000003307 | 6259          |
| ENSACAG00000006612 | 6260 ZNF512B  |
| ENSACAG00000015960 | 6261 LPTM4B   |
| ENSACAG00000006761 | 6262 MFSD5    |
| ENSACAG00000014416 | 6263 ASNSD1   |
| ENSACAG00000027890 | 6264          |
| ENSACAG00000010398 | 6265 OSGIN2   |
| ENSACAG00000005126 | 6266 DLX4     |
| ENSACAG00000002735 | 6267 INPP4B   |
| ENSACAG00000012393 | 6268 ERLEC1   |
| ENSACAG00000007530 | 6269 SHISA3   |
| ENSACAG00000013429 | 6270          |
| ENSACAG00000010183 | 6271 PIAS1    |
| ENSACAG00000007236 | 6272 GALK1    |
| ENSACAG00000006017 | 6273 DBN1     |
| ENSACAG00000026765 | 6274          |
| ENSACAG00000010487 | 6275          |
| ENSACAG00000002828 | 6276 POLR2H   |
| ENSACAG00000012884 | 6277 KIFAP3   |
| ENSACAG00000006426 | 6278          |
| ENSACAG00000008464 | 6279 AMOT     |
| ENSACAG00000012005 | 6280          |
| ENSACAG00000000631 | 6281 ULK2     |
| ENSACAG00000005562 | 6282 PFKM     |
| ENSACAG00000008350 | 6283 CFAP20   |
| ENSACAG00000006455 | 6284 PSEN2    |
| ENSACAG00000009701 | 6285 FUT11    |
| ENSACAG00000001454 | 6286 CHSY3    |
| ENSACAG00000011324 | 6287 CEP290   |
| ENSACAG00000005518 | 6288 CIR1     |
| ENSACAG00000011252 | 6289 C12orf29 |
| ENSACAG00000007111 | 6290 HOOK1    |
| ENSACAG00000009608 | 6291 ZHX1     |
| ENSACAG00000003889 | 6292 INTS8    |
| ENSACAG00000014854 | 6293 KIF2C    |
| ENSACAG00000023169 | 6294          |
| ENSACAG00000016095 | 6295 GLT8D2   |
| ENSACAG00000013091 | 6296 TTC37    |
| ENSACAG00000009546 | 6297 DEF8     |
| ENSACAG00000004600 | 6298 SLC17A5  |

|                     |              |
|---------------------|--------------|
| ENSACAG00000004033  | 6299 FANCL   |
| ENSACAG00000000941  | 6300 NFATC1  |
| ENSACAG00000004584  | 6301 HMGN3   |
| ENSACAG000000025913 | 6302         |
| ENSACAG000000026108 | 6303         |
| ENSACAG000000028657 | 6304         |
| ENSACAG000000003679 | 6305 PACS1   |
| ENSACAG000000006020 | 6306 NPAT    |
| ENSACAG000000015194 | 6307         |
| ENSACAG000000002588 | 6308 EGLN3   |
| ENSACAG000000009672 | 6309 CREB1   |
| ENSACAG000000014335 | 6310 ADGRL3  |
| ENSACAG000000016709 | 6311 GPATCH3 |
| ENSACAG000000016397 | 6312 NMT2    |
| ENSACAG000000015047 | 6313 RNF115  |
| ENSACAG000000016627 | 6314 R3HCC1  |
| ENSACAG000000005795 | 6315 EPHX1   |
| ENSACAG000000006730 | 6316 DTX4    |
| ENSACAG000000003279 | 6317 MRPS21  |
| ENSACAG000000014255 | 6318 DCBLD1  |
| ENSACAG000000002312 | 6319 RAD54L  |
| ENSACAG000000027648 | 6320         |
| ENSACAG000000000595 | 6321 CENPO   |
| ENSACAG000000012853 | 6322 TUBD1   |
| ENSACAG000000010428 | 6323 URM1    |
| ENSACAG000000009575 | 6324 SPRYD3  |
| ENSACAG000000014337 | 6325 STK11IP |
| ENSACAG000000009424 | 6326 FECH    |
| ENSACAG000000023914 | 6327         |
| ENSACAG000000000324 | 6328 FAM134B |
| ENSACAG000000007837 | 6329 TEN1    |
| ENSACAG000000011576 | 6330 RTTN    |
| ENSACAG000000000483 | 6331 SLC33A1 |
| ENSACAG000000009607 | 6332 CEP70   |
| ENSACAG000000005538 | 6333 GINS2   |
| ENSACAG000000019988 | 6334 SNORD79 |
| ENSACAG000000013986 | 6335 STK11   |
| ENSACAG000000015728 | 6336 LRRC57  |
| ENSACAG000000006650 | 6337 ESPL1   |
| ENSACAG000000014239 | 6338 CSRP2BP |
| ENSACAG000000006099 | 6339 ZNF384  |
| ENSACAG000000028763 | 6340 IFT74   |

|                    |               |
|--------------------|---------------|
| ENSACAG00000000176 | 6341 TECPR2   |
| ENSACAG00000017173 | 6342 XAB2     |
| ENSACAG00000002553 | 6343 BRAP     |
| ENSACAG00000008066 | 6344 RAD9A    |
| ENSACAG00000013572 | 6345 PTDSS2   |
| ENSACAG00000001746 | 6346 VSNL1    |
| ENSACAG00000011904 | 6347 PHF8     |
| ENSACAG00000012421 | 6348          |
| ENSACAG00000028687 | 6349 COA1     |
| ENSACAG00000016981 | 6350 ECSIT    |
| ENSACAG00000008165 | 6351 DFFB     |
| ENSACAG00000013365 | 6352 GALC     |
| ENSACAG00000002424 | 6353 POMGNT1  |
| ENSACAG00000011999 | 6354 WDFY2    |
| ENSACAG00000001741 | 6355 TSTA3    |
| ENSACAG00000004869 | 6356 CLMP     |
| ENSACAG00000000651 | 6357 GINS4    |
| ENSACAG00000007161 | 6358          |
| ENSACAG00000004585 | 6359 IQCC     |
| ENSACAG00000004052 | 6360 ERMP1    |
| ENSACAG00000013685 | 6361 DNPEP    |
| ENSACAG00000002935 | 6362          |
| ENSACAG00000016605 | 6363 FTSJ1    |
| ENSACAG00000015423 | 6364 RILPL2   |
| ENSACAG00000012372 | 6365          |
| ENSACAG00000006143 | 6366 DHX57    |
| ENSACAG00000019696 | 6367 SNORD30  |
| ENSACAG00000026242 | 6368          |
| ENSACAG00000003213 | 6369 SMOC2    |
| ENSACAG00000004285 | 6370 PRSS35   |
| ENSACAG00000020480 | 6371 SNORD99  |
| ENSACAG00000016240 | 6372 ATG14    |
| ENSACAG00000004186 | 6373 GABPB1   |
| ENSACAG00000016760 | 6374 DBR1     |
| ENSACAG00000007650 | 6375 NABP2    |
| ENSACAG00000009150 | 6376 MED29    |
| ENSACAG00000008956 | 6377 YIPF1    |
| ENSACAG00000003995 | 6378 TRNAU1AP |
| ENSACAG00000005537 | 6379 ANKH     |
| ENSACAG00000016955 | 6380 FLVCR2   |
| ENSACAG00000011174 | 6381          |
| ENSACAG00000005701 | 6382 GRAMD1A  |



|                    |               |
|--------------------|---------------|
| ENSACAG00000001731 | 6383 PIGG     |
| ENSACAG00000012211 | 6384 C10orf76 |
| ENSACAG00000005184 | 6385 ACSF2    |
| ENSACAG00000011121 | 6386 AASDHPPT |
| ENSACAG00000002262 | 6387 TLE1     |
| ENSACAG00000003577 | 6388 ANO1     |
| ENSACAG00000010331 | 6389 TGFBRAP1 |
| ENSACAG00000000286 | 6390 MAP2K2   |
| ENSACAG00000005028 | 6391 SHISA4   |
| ENSACAG00000017227 | 6392 DOLPP1   |
| ENSACAG00000023104 | 6393 CTNBL1   |
| ENSACAG00000007988 | 6394 PGGT1B   |
| ENSACAG00000008343 | 6395          |
| ENSACAG00000027139 | 6396          |
| ENSACAG00000009840 | 6397 LRP12    |
| ENSACAG00000028830 | 6398 FAM76B   |
| ENSACAG00000016499 | 6399 TOMM40   |
| ENSACAG00000001261 | 6400 TERT     |
| ENSACAG00000003986 | 6401 ZC3H4    |
| ENSACAG00000000975 | 6402          |
| ENSACAG00000003732 | 6403 FBXW9    |
| ENSACAG00000014642 | 6404 DHX37    |
| ENSACAG00000000664 | 6405 MCM8     |
| ENSACAG00000024248 | 6406 LETMD1   |
| ENSACAG00000000922 | 6407 ROR2     |
| ENSACAG00000008890 | 6408 GOLGA5   |
| ENSACAG00000008682 | 6409          |
| ENSACAG00000006556 | 6410 SNX11    |
| ENSACAG00000007324 | 6411 KLF3     |
| ENSACAG00000013255 | 6412 SLF1     |
| ENSACAG00000011798 | 6413 PHKA2    |
| ENSACAG00000011905 | 6414 POC1B    |
| ENSACAG00000007409 | 6415 BBS2     |
| ENSACAG00000004220 | 6416 NEGR1    |
| ENSACAG00000011571 | 6417 MGAT1    |
| ENSACAG00000000100 | 6418 SMOX     |
| ENSACAG00000029516 | 6419          |
| ENSACAG00000011419 | 6420 FBRS     |
| ENSACAG00000016482 | 6421 ISCA2    |
| ENSACAG00000000191 | 6422 ADAL     |
| ENSACAG00000009644 | 6423 DUSP27   |
| ENSACAG00000022183 | 6424          |

|                    |                 |
|--------------------|-----------------|
| ENSACAG00000014742 | 6425 MVP        |
| ENSACAG00000005228 | 6426 DNLZ       |
| ENSACAG00000008356 | 6427 DUSP12     |
| ENSACAG00000015491 | 6428 PRDX6      |
| ENSACAG00000027251 | 6429            |
| ENSACAG00000006599 | 6430 B4GALT7    |
| ENSACAG00000012437 | 6431 G6PD       |
| ENSACAG00000006713 | 6432 FOXP2      |
| ENSACAG00000013698 | 6433 PFKFB2     |
| ENSACAG00000006636 | 6434 ABT1       |
| ENSACAG00000009826 | 6435            |
| ENSACAG00000002434 | 6436 NUDCD1     |
| ENSACAG00000029337 | 6437            |
| ENSACAG00000017585 | 6438 FOCAD      |
| ENSACAG00000004137 | 6439 STARD13    |
| ENSACAG00000013458 | 6440 GJB3       |
| ENSACAG00000013666 | 6441 FBXL2      |
| ENSACAG00000029213 | 6442 KITLG      |
| ENSACAG00000009047 | 6443 PAF1       |
| ENSACAG00000017125 | 6444            |
| ENSACAG00000024512 | 6445            |
| ENSACAG00000004695 | 6446            |
| ENSACAG00000020984 | 6447 ZNF219     |
| ENSACAG00000007963 | 6448 CENPI      |
| ENSACAG00000008308 | 6449 C1orf112   |
| ENSACAG00000014088 | 6450 NUP98      |
| ENSACAG00000005107 | 6451 KDM5B      |
| ENSACAG00000001972 | 6452 ELMO3      |
| ENSACAG00000011672 | 6453 ADSSL1     |
| ENSACAG00000029481 | 6454            |
| ENSACAG00000002575 | 6455 EAPP       |
| ENSACAG00000001917 | 6456 SYTL2      |
| ENSACAG00000001617 | 6457 PNKD       |
| ENSACAG00000018867 | 6458 aca-let-7b |
| ENSACAG00000017670 | 6459 TUBB2B     |
| ENSACAG00000000234 | 6460 MSANTD2    |
| ENSACAG00000000792 | 6461 MED10      |
| ENSACAG00000008030 | 6462 VPS53      |
| ENSACAG00000013155 | 6463 MAN1B1     |
| ENSACAG00000002634 | 6464 NIN        |
| ENSACAG00000015160 | 6465            |
| ENSACAG00000017687 | 6466 ST14       |

|                    |               |
|--------------------|---------------|
| ENSACAG00000002662 | 6467 MDFI     |
| ENSACAG00000017373 | 6468 FN3KRP   |
| ENSACAG00000007985 | 6469 POLR3A   |
| ENSACAG00000012652 | 6470 HAUS1    |
| ENSACAG00000009597 | 6471 XRCC5    |
| ENSACAG00000020556 | 6472 SNORD87  |
| ENSACAG00000029045 | 6473 CCNI2    |
| ENSACAG00000016318 | 6474 PAIP2    |
| ENSACAG00000008896 | 6475 PAICS    |
| ENSACAG00000007528 | 6476 RBP5     |
| ENSACAG00000016307 | 6477 ALDH6A1  |
| ENSACAG00000015911 | 6478 MND1     |
| ENSACAG00000010218 | 6479 ARPP21   |
| ENSACAG00000006336 | 6480 NSL1     |
| ENSACAG00000000051 | 6481 USH1C    |
| ENSACAG00000007463 | 6482 SND1     |
| ENSACAG00000000006 | 6483 PNPLA8   |
| ENSACAG00000011867 | 6484 PDGFD    |
| ENSACAG00000009914 | 6485 SMAD2    |
| ENSACAG00000010519 | 6486          |
| ENSACAG00000025493 | 6487 SNAPIN   |
| ENSACAG00000005668 | 6488          |
| ENSACAG00000002695 | 6489 C6orf201 |
| ENSACAG00000002702 | 6490 DEPDC7   |
| ENSACAG00000010982 | 6491 MYO5A    |
| ENSACAG00000004229 | 6492 DNAJC28  |
| ENSACAG00000000355 | 6493 SUCLG1   |
| ENSACAG00000001925 | 6494 PI4KB    |
| ENSACAG00000004917 | 6495 HECA     |
| ENSACAG00000012141 | 6496 POLR1A   |
| ENSACAG00000009813 | 6497 LYRM1    |
| ENSACAG00000015492 | 6498 TRIOBP   |
| ENSACAG00000001188 | 6499          |
| ENSACAG00000003168 | 6500 FAM208B  |
| ENSACAG00000008434 | 6501 ECHDC2   |
| ENSACAG00000006781 | 6502 POC1A    |
| ENSACAG00000003048 | 6503 ZFYVE27  |
| ENSACAG00000027388 | 6504          |
| ENSACAG00000002580 | 6505 CAPN7    |
| ENSACAG00000010246 | 6506          |
| ENSACAG00000010506 | 6507 BMP1     |
| ENSACAG00000015681 | 6508 SPHK2    |

|                    |               |
|--------------------|---------------|
| ENSACAG00000006544 | 6509 ZC3H18   |
| ENSACAG00000004488 | 6510          |
| ENSACAG00000015100 | 6511 ZMYM3    |
| ENSACAG00000001349 | 6512          |
| ENSACAG00000006323 | 6513 CDCA7    |
| ENSACAG00000005587 | 6514 GNMT     |
| ENSACAG00000002156 | 6515 LMO7     |
| ENSACAG00000012830 | 6516 SCYL3    |
| ENSACAG00000029475 | 6517          |
| ENSACAG00000002676 | 6518 SPTAN1   |
| ENSACAG00000014533 | 6519 C11orf54 |
| ENSACAG00000021704 | 6520 5S_rRNA  |
| ENSACAG00000001750 | 6521 CCNDBP1  |
| ENSACAG00000007715 | 6522 VPS8     |
| ENSACAG00000014882 | 6523 TRIM71   |
| ENSACAG00000004619 | 6524 PMM1     |
| ENSACAG00000002387 | 6525 NUDT7    |
| ENSACAG00000006880 | 6526 CDC23    |
| ENSACAG00000010636 | 6527 ZGRF1    |
| ENSACAG00000001270 | 6528 PQLC1    |
| ENSACAG00000016472 | 6529 ADAMTS2  |
| ENSACAG00000008334 | 6530 ZYG11B   |
| ENSACAG00000004689 | 6531 CD109    |
| ENSACAG00000008274 | 6532          |
| ENSACAG00000016620 | 6533 DCAF17   |
| ENSACAG00000012417 | 6534 BTG1     |
| ENSACAG00000012754 | 6535 MUT      |
| ENSACAG00000028642 | 6536 CCDC24   |
| ENSACAG00000008131 | 6537 TBX15    |
| ENSACAG00000005186 | 6538 HERC2    |
| ENSACAG00000015349 | 6539 RABEP1   |
| ENSACAG00000007616 | 6540 TAB1     |
| ENSACAG00000012432 | 6541 LCOR     |
| ENSACAG00000016748 | 6542 HMGXB4   |
| ENSACAG00000008416 | 6543 GLUL     |
| ENSACAG00000005624 | 6544          |
| ENSACAG00000014627 | 6545 GPD1L    |
| ENSACAG00000013178 | 6546          |
| ENSACAG00000017614 | 6547 MLLT3    |
| ENSACAG00000005029 | 6548 CLCN7    |
| ENSACAG00000012137 | 6549          |
| ENSACAG00000007314 | 6550 GALNT14  |

|                     |               |
|---------------------|---------------|
| ENSACAG00000001140  | 6551 UBXN6    |
| ENSACAG00000006015  | 6552 HMCES    |
| ENSACAG00000006920  | 6553 NEO1     |
| ENSACAG00000002384  | 6554 BROX     |
| ENSACAG000000025814 | 6555          |
| ENSACAG000000029218 | 6556 MEIG1    |
| ENSACAG00000001633  | 6557 B3GALNT2 |
| ENSACAG00000002932  | 6558 TPRG1    |
| ENSACAG000000022489 | 6559          |
| ENSACAG000000009782 | 6560 KIF1BP   |
| ENSACAG00000002190  | 6561 ARMC9    |
| ENSACAG000000017671 | 6562 NFRKB    |
| ENSACAG000000003091 | 6563 POP5     |
| ENSACAG000000016269 | 6564 RBL2     |
| ENSACAG000000006131 | 6565 FRYL     |
| ENSACAG000000015242 | 6566 MYO1E    |
| ENSACAG000000002896 | 6567 ZNRF2    |
| ENSACAG000000013127 | 6568          |
| ENSACAG000000005800 | 6569 BACE2    |
| ENSACAG000000008533 | 6570          |
| ENSACAG000000013377 | 6571 DAPK1    |
| ENSACAG000000012097 | 6572          |
| ENSACAG000000000435 | 6573 RSG1     |
| ENSACAG000000001141 | 6574 COA6     |
| ENSACAG000000015007 | 6575 CD74     |
| ENSACAG000000006911 | 6576 DTNA     |
| ENSACAG000000006691 | 6577 KHDRBS2  |
| ENSACAG000000009683 | 6578 NMUR2    |
| ENSACAG000000004713 | 6579 GYS1     |
| ENSACAG000000015631 | 6580 CWC27    |
| ENSACAG000000016101 | 6581 FBXO33   |
| ENSACAG000000006456 | 6582          |
| ENSACAG000000025647 | 6583 C14orf79 |
| ENSACAG000000016020 | 6584 CASS4    |
| ENSACAG000000003937 | 6585 PALMD    |
| ENSACAG000000004701 | 6586 TRPC1    |
| ENSACAG000000005790 | 6587          |
| ENSACAG000000023925 | 6588          |
| ENSACAG000000003534 | 6589 NDUFS2   |
| ENSACAG000000011704 | 6590 NCAPG2   |
| ENSACAG000000026509 | 6591          |
| ENSACAG000000015466 | 6592 RPH3AL   |

|                    |               |
|--------------------|---------------|
| ENSACAG00000007174 | 6593 JAZF1    |
| ENSACAG00000002673 | 6594 HSPB7    |
| ENSACAG00000002632 | 6595 ME3      |
| ENSACAG00000011160 | 6596 XRCC4    |
| ENSACAG00000016423 | 6597 ABCD4    |
| ENSACAG00000014638 | 6598 BRI3BP   |
| ENSACAG00000011206 | 6599 STARD5   |
| ENSACAG00000008679 | 6600 RERE     |
| ENSACAG00000011569 | 6601 TRAF3IP2 |
| ENSACAG00000003148 | 6602 CHTF8    |
| ENSACAG00000013700 | 6603 CEP57    |
| ENSACAG00000001382 | 6604 ZDHHC15  |
| ENSACAG00000011040 | 6605 EFTUD1   |
| ENSACAG00000008232 | 6606 MRPL4    |
| ENSACAG00000008567 | 6607 CBFA2T2  |
| ENSACAG00000026746 | 6608 HAX1     |
| ENSACAG00000010053 | 6609 DCLRE1A  |
| ENSACAG00000010181 | 6610 INTS9    |
| ENSACAG00000028757 | 6611 TMEM159  |
| ENSACAG00000023123 | 6612          |
| ENSACAG00000024341 | 6613          |
| ENSACAG00000008761 | 6614 E2F1     |
| ENSACAG00000028412 | 6615          |
| ENSACAG00000015038 | 6616 L3HYPDH  |
| ENSACAG00000022758 | 6617 JUNB     |
| ENSACAG00000008086 | 6618          |
| ENSACAG00000016965 | 6619          |
| ENSACAG00000005914 | 6620 AK5      |
| ENSACAG00000016974 | 6621 SUV420H2 |
| ENSACAG00000012684 | 6622 SEC24B   |
| ENSACAG00000026600 | 6623          |
| ENSACAG00000003841 | 6624 MRAS     |
| ENSACAG00000011124 | 6625 RPP21    |
| ENSACAG00000001459 | 6626 BPNT1    |
| ENSACAG00000028614 | 6627 AUH      |
| ENSACAG00000002350 | 6628 FANCE    |
| ENSACAG00000007843 | 6629 STARD8   |
| ENSACAG00000009693 | 6630 AIP      |
| ENSACAG00000007512 | 6631 KIAA1462 |
| ENSACAG00000005772 | 6632 NARFL    |
| ENSACAG00000028947 | 6633 C18orf32 |
| ENSACAG00000006183 | 6634 ING1     |

|                    |               |
|--------------------|---------------|
| ENSACAG00000005481 | 6635 GALR1    |
| ENSACAG00000013761 | 6636 SPEN     |
| ENSACAG00000018139 | 6637 snoU54   |
| ENSACAG00000008469 | 6638 SCP2     |
| ENSACAG00000000144 | 6639 TRAPPC9  |
| ENSACAG00000027698 | 6640          |
| ENSACAG00000014580 | 6641 SLC25A13 |
| ENSACAG00000010131 | 6642          |
| ENSACAG00000013259 | 6643          |
| ENSACAG00000006587 | 6644 CAV2     |
| ENSACAG00000006582 | 6645 TMEM94   |
| ENSACAG00000015463 | 6646 TACO1    |
| ENSACAG00000027104 | 6647          |
| ENSACAG00000001820 | 6648 AKAP7    |
| ENSACAG00000008207 | 6649 LRRK2    |
| ENSACAG00000008408 | 6650 PRKCD    |
| ENSACAG00000001718 | 6651 ACTG2    |
| ENSACAG00000013643 | 6652          |
| ENSACAG00000003870 | 6653 ARHGEF15 |
| ENSACAG00000004956 | 6654 AKT1S1   |
| ENSACAG00000015108 | 6655          |
| ENSACAG00000017419 | 6656 ZNF385B  |
| ENSACAG00000013516 | 6657 WDR25    |
| ENSACAG00000015378 | 6658 RBM48    |
| ENSACAG00000009076 | 6659 SHMT1    |
| ENSACAG00000016618 | 6660 PROSER3  |
| ENSACAG00000015684 | 6661 SLC26A11 |
| ENSACAG00000002445 | 6662 NAE1     |
| ENSACAG00000013153 | 6663 RBM28    |
| ENSACAG00000028993 | 6664 PHF13    |
| ENSACAG00000008531 | 6665 HADHA    |
| ENSACAG00000015430 | 6666 C11orf57 |
| ENSACAG00000009257 | 6667 RARB     |
| ENSACAG00000009760 | 6668 USP40    |
| ENSACAG00000017826 | 6669 MAN1C1   |
| ENSACAG00000022410 | 6670          |
| ENSACAG00000026915 | 6671          |
| ENSACAG00000009172 | 6672 C10orf35 |
| ENSACAG00000016857 | 6673          |
| ENSACAG00000003176 | 6674 PRPF3    |
| ENSACAG00000003321 | 6675 LRP4     |
| ENSACAG00000017857 | 6676 B4GALT6  |

|                    |               |
|--------------------|---------------|
| ENSACAG00000015202 | 6677 DUS4L    |
| ENSACAG00000022250 | 6678          |
| ENSACAG00000009614 | 6679 KDR      |
| ENSACAG00000015045 | 6680 FAM63B   |
| ENSACAG00000017709 | 6681 ADAMTS8  |
| ENSACAG00000002296 | 6682 SETD2    |
| ENSACAG00000015394 | 6683 PEX1     |
| ENSACAG00000001130 | 6684 ABCB10   |
| ENSACAG00000012039 | 6685 ACOX3    |
| ENSACAG00000001473 | 6686 LYSMD2   |
| ENSACAG00000001858 | 6687 FUT8     |
| ENSACAG00000009912 | 6688 FAM91A1  |
| ENSACAG00000003994 | 6689 DDX42    |
| ENSACAG00000009624 | 6690          |
| ENSACAG00000005820 | 6691          |
| ENSACAG00000000427 | 6692 MIDN     |
| ENSACAG00000005065 | 6693 RBM19    |
| ENSACAG00000013040 | 6694 C1GALT1  |
| ENSACAG00000000092 | 6695          |
| ENSACAG00000007212 | 6696 CD276    |
| ENSACAG00000014828 | 6697          |
| ENSACAG00000008315 | 6698 SV2C     |
| ENSACAG00000001028 | 6699 BRIP1    |
| ENSACAG00000001267 | 6700          |
| ENSACAG00000007967 | 6701 EMC3     |
| ENSACAG00000016429 | 6702 ECT2     |
| ENSACAG00000010317 | 6703 NRBF2    |
| ENSACAG00000004818 | 6704 MYOG     |
| ENSACAG00000003573 | 6705 SSFA2    |
| ENSACAG00000000882 | 6706          |
| ENSACAG00000013608 | 6707          |
| ENSACAG00000025458 | 6708 MSANTD3  |
| ENSACAG00000025111 | 6709          |
| ENSACAG00000002517 | 6710 CLK2     |
| ENSACAG00000010644 | 6711          |
| ENSACAG00000010536 | 6712 MMS22L   |
| ENSACAG00000009484 | 6713 C2orf76  |
| ENSACAG00000023496 | 6714          |
| ENSACAG00000002307 | 6715          |
| ENSACAG00000001291 | 6716 CALCOCO1 |
| ENSACAG00000017478 | 6717 SLC6A16  |
| ENSACAG00000029326 | 6718 PQLC3    |



|                    |               |
|--------------------|---------------|
| ENSACAG00000002064 | 6719          |
| ENSACAG00000014124 | 6720 NRF1     |
| ENSACAG00000012837 | 6721 ABHD17B  |
| ENSACAG00000016648 | 6722          |
| ENSACAG00000010272 | 6723 CLN6     |
| ENSACAG00000011418 | 6724 ACOX2    |
| ENSACAG00000006292 | 6725          |
| ENSACAG00000003029 | 6726 FAM134A  |
| ENSACAG00000008128 | 6727 ETV5     |
| ENSACAG00000008522 | 6728          |
| ENSACAG00000006389 | 6729 KLF8     |
| ENSACAG00000013053 | 6730 TMEM70   |
| ENSACAG00000017168 | 6731 ASB16    |
| ENSACAG00000012969 | 6732 MCOLN3   |
| ENSACAG00000014408 | 6733 SLC2A4   |
| ENSACAG00000022434 | 6734          |
| ENSACAG00000000725 | 6735 TBCC     |
| ENSACAG00000008602 | 6736 DCC      |
| ENSACAG00000001650 | 6737 MTSS1L   |
| ENSACAG00000004480 | 6738 ALDH18A1 |
| ENSACAG00000003316 | 6739 TPMT     |
| ENSACAG00000002788 | 6740 TBCEL    |
| ENSACAG00000002097 | 6741 FCHSD2   |
| ENSACAG00000013673 | 6742 CHMP2B   |
| ENSACAG00000014117 | 6743 SYT4     |
| ENSACAG00000001878 | 6744          |
| ENSACAG00000009738 | 6745 C3orf58  |
| ENSACAG00000016420 | 6746 NCEH1    |
| ENSACAG00000023267 | 6747 ENSA     |
| ENSACAG00000006903 | 6748          |
| ENSACAG00000011640 | 6749 ZNF692   |
| ENSACAG00000006898 | 6750 TNNC1    |
| ENSACAG00000014066 | 6751 HECW2    |
| ENSACAG00000009743 | 6752 ERI2     |
| ENSACAG00000009218 | 6753 POMK     |
| ENSACAG00000014750 | 6754 RBM22    |
| ENSACAG00000023481 | 6755 POLD1    |
| ENSACAG00000011843 | 6756 SENP7    |
| ENSACAG00000024718 | 6757          |
| ENSACAG00000024012 | 6758          |
| ENSACAG00000021969 | 6759 HYAL1    |
| ENSACAG00000002306 | 6760 LRRC29   |

|                     |              |
|---------------------|--------------|
| ENSACAG00000001754  | 6761 INTS4   |
| ENSACAG00000000456  | 6762 ADAM12  |
| ENSACAG000000013436 | 6763 ADCK4   |
| ENSACAG000000000419 | 6764 TMEM127 |
| ENSACAG000000007992 | 6765 IQGAP2  |
| ENSACAG000000011855 | 6766 CCDC174 |
| ENSACAG000000009158 | 6767 H6PD    |
| ENSACAG000000000825 | 6768 PIBF1   |
| ENSACAG000000005657 | 6769 TRNT1   |
| ENSACAG000000001158 | 6770 PCK2    |
| ENSACAG000000014653 | 6771 CRY2    |
| ENSACAG000000000256 | 6772 DGKQ    |
| ENSACAG000000011734 | 6773 N4BP2   |
| ENSACAG000000012565 | 6774 AP3M2   |
| ENSACAG000000014245 | 6775 OBSL1   |
| ENSACAG000000000389 | 6776 ZCCHC17 |
| ENSACAG000000015230 | 6777 ZSWIM5  |
| ENSACAG000000009334 | 6778 PLK2    |
| ENSACAG000000001701 | 6779 LYST    |
| ENSACAG000000006731 | 6780 SLC26A5 |
| ENSACAG000000001070 | 6781 CADM1   |
| ENSACAG000000006402 | 6782 PRDX5   |
| ENSACAG000000016339 | 6783 LIN52   |
| ENSACAG000000001850 | 6784 SAR1B   |
| ENSACAG000000026956 | 6785         |
| ENSACAG000000028629 | 6786         |
| ENSACAG000000003137 | 6787 EXTL2   |
| ENSACAG000000024793 | 6788         |
| ENSACAG000000027964 | 6789         |
| ENSACAG000000029619 | 6790 LTC4S   |
| ENSACAG000000013786 | 6791 RAD51   |
| ENSACAG000000002054 | 6792 NANS    |
| ENSACAG000000004903 | 6793 B3GLCT  |
| ENSACAG000000006668 | 6794 INTS7   |
| ENSACAG000000002967 | 6795 ATM     |
| ENSACAG000000004909 | 6796 GTF2H5  |
| ENSACAG000000027559 | 6797         |
| ENSACAG000000002734 | 6798 PRSS23  |
| ENSACAG000000002900 | 6799 BIVM    |
| ENSACAG000000008526 | 6800 DOC2B   |
| ENSACAG000000026170 | 6801 NDST1   |
| ENSACAG000000007649 | 6802 MPP7    |

|                    |               |
|--------------------|---------------|
| ENSACAG00000017560 | 6803 PLEKHA5  |
| ENSACAG00000014815 | 6804 PEX16    |
| ENSACAG00000001449 | 6805 MID2     |
| ENSACAG00000004367 | 6806 CDK5RAP1 |
| ENSACAG00000003362 | 6807          |
| ENSACAG00000010700 | 6808          |
| ENSACAG00000027159 | 6809          |
| ENSACAG00000011398 | 6810 TCF7L1   |
| ENSACAG00000015847 | 6811 NADSYN1  |
| ENSACAG00000001902 | 6812 BAIAP2L1 |
| ENSACAG00000015536 | 6813 PREPL    |
| ENSACAG00000010085 | 6814 GAPDHS   |
| ENSACAG00000013383 | 6815          |
| ENSACAG00000004910 | 6816 SLC27A1  |
| ENSACAG00000021059 | 6817          |
| ENSACAG00000024384 | 6818 PPP1R18  |
| ENSACAG00000006038 | 6819 C6orf132 |
| ENSACAG00000017513 | 6820 RIC8A    |
| ENSACAG00000014477 | 6821 CSK      |
| ENSACAG00000014060 | 6822          |
| ENSACAG00000001355 | 6823 SOS2     |
| ENSACAG00000003098 | 6824 S1PR1    |
| ENSACAG00000016334 | 6825 NCOA3    |
| ENSACAG00000017742 | 6826 NTM      |
| ENSACAG00000002451 | 6827          |
| ENSACAG00000007340 | 6828 NGDN     |
| ENSACAG00000006640 | 6829 NFXL1    |
| ENSACAG00000012638 | 6830 METTL13  |
| ENSACAG00000014468 | 6831 TERF1    |
| ENSACAG00000002392 | 6832 PTK2B    |
| ENSACAG00000000580 | 6833 RSPH9    |
| ENSACAG00000017701 | 6834 NQO2     |
| ENSACAG00000008540 | 6835 INTS12   |
| ENSACAG00000016340 | 6836          |
| ENSACAG00000002977 | 6837 SGCG     |
| ENSACAG00000010769 | 6838 TTF2     |
| ENSACAG00000000371 | 6839 GOLM1    |
| ENSACAG00000014116 | 6840 HDX      |
| ENSACAG00000025078 | 6841 MCPH1    |
| ENSACAG00000010163 | 6842          |
| ENSACAG00000000685 | 6843          |
| ENSACAG00000004451 | 6844 MB21D1   |

|                    |               |
|--------------------|---------------|
| ENSACAG00000016492 | 6845 FBXO21   |
| ENSACAG00000013416 | 6846 RND2     |
| ENSACAG00000013026 | 6847          |
| ENSACAG00000010060 | 6848 SYVN1    |
| ENSACAG00000026579 | 6849          |
| ENSACAG00000000462 | 6850 P3H2     |
| ENSACAG00000005113 | 6851 CLIC6    |
| ENSACAG00000001838 | 6852 ALAD     |
| ENSACAG00000024185 | 6853          |
| ENSACAG00000009772 | 6854 LMLN     |
| ENSACAG00000009138 | 6855 EXOG     |
| ENSACAG00000015278 | 6856 SNX14    |
| ENSACAG00000003108 | 6857 BLVRB    |
| ENSACAG00000005695 | 6858 ZNF654   |
| ENSACAG00000008678 | 6859 C21orf2  |
| ENSACAG00000010669 | 6860 HS1BP3   |
| ENSACAG00000014694 | 6861          |
| ENSACAG00000006164 | 6862 CEP57L1  |
| ENSACAG00000011568 | 6863 SOCS6    |
| ENSACAG00000015158 | 6864 CTSC     |
| ENSACAG00000006451 | 6865          |
| ENSACAG00000008105 | 6866 OSGEP    |
| ENSACAG00000015936 | 6867 VPS13C   |
| ENSACAG00000011482 | 6868 CHTOP    |
| ENSACAG00000015342 | 6869          |
| ENSACAG00000000800 | 6870 TMEM5    |
| ENSACAG00000000460 | 6871          |
| ENSACAG00000014262 | 6872 DPP9     |
| ENSACAG00000005867 | 6873 TRAPPC12 |
| ENSACAG00000006862 | 6874 KREMEN2  |
| ENSACAG00000009385 | 6875 TNS2     |
| ENSACAG00000012289 | 6876 TFCP2    |
| ENSACAG00000006065 | 6877 FAM155A  |
| ENSACAG00000003554 | 6878 HELB     |
| ENSACAG00000013421 | 6879 GSKIP    |
| ENSACAG00000017804 | 6880 EXTL1    |
| ENSACAG00000017337 | 6881          |
| ENSACAG00000014312 | 6882 DPH2     |
| ENSACAG00000002767 | 6883          |
| ENSACAG00000016130 | 6884 LENG1    |
| ENSACAG00000013597 | 6885 TENM3    |
| ENSACAG00000028065 | 6886 IFNGR1   |

|                    |               |
|--------------------|---------------|
| ENSACAG00000008160 | 6887 C7orf57  |
| ENSACAG00000014329 | 6888 SAV1     |
| ENSACAG00000007102 | 6889 PGM2     |
| ENSACAG00000007748 | 6890 PDE8B    |
| ENSACAG00000007418 | 6891 SOCS7    |
| ENSACAG00000016823 | 6892          |
| ENSACAG00000024019 | 6893 C5orf42  |
| ENSACAG00000013652 | 6894 DVL1     |
| ENSACAG00000014958 | 6895 ZMYND19  |
| ENSACAG00000015028 | 6896 ZNF687   |
| ENSACAG00000014012 | 6897 CIAPIN1  |
| ENSACAG00000015727 | 6898 SPATA5L1 |
| ENSACAG00000016309 | 6899 ZFYVE1   |
| ENSACAG00000001386 | 6900 CATSPER3 |
| ENSACAG00000004274 | 6901 TTC7A    |
| ENSACAG00000017545 | 6902          |
| ENSACAG00000000417 | 6903 TMEM255B |
| ENSACAG00000025109 | 6904          |
| ENSACAG00000029141 | 6905 DAAM1    |
| ENSACAG00000008839 | 6906 KAT5     |
| ENSACAG00000008004 | 6907 IST1     |
| ENSACAG00000006224 | 6908 ANGEL2   |
| ENSACAG00000007888 | 6909 PCYOX1   |
| ENSACAG00000028813 | 6910 CHMP1A   |
| ENSACAG00000011934 | 6911 ZBTB11   |
| ENSACAG00000010171 | 6912          |
| ENSACAG00000000810 | 6913 ELMOD3   |
| ENSACAG00000027131 | 6914          |
| ENSACAG00000005257 | 6915 EME1     |
| ENSACAG00000007176 | 6916 SBF1     |
| ENSACAG00000003551 | 6917          |
| ENSACAG00000004746 | 6918          |
| ENSACAG00000012888 | 6919          |
| ENSACAG00000004980 | 6920 MCM3AP   |
| ENSACAG00000002133 | 6921 POLA2    |
| ENSACAG00000003010 | 6922 STOX2    |
| ENSACAG00000003067 | 6923 PDE12    |
| ENSACAG00000013791 | 6924 DSE      |
| ENSACAG00000010030 | 6925 ITGA7    |
| ENSACAG00000011691 | 6926 REEP1    |
| ENSACAG00000010761 | 6927 MOB3B    |
| ENSACAG00000007647 | 6928 VPS28    |

|                    |               |
|--------------------|---------------|
| ENSACAG00000008745 | 6929 TTYH3    |
| ENSACAG00000004395 | 6930 EHD1     |
| ENSACAG00000016134 | 6931 PNPLA6   |
| ENSACAG00000003187 | 6932 CASQ2    |
| ENSACAG00000003712 | 6933 EDN3     |
| ENSACAG00000012015 | 6934          |
| ENSACAG00000002532 | 6935 TGDS     |
| ENSACAG00000016353 | 6936 SLC30A1  |
| ENSACAG00000010597 | 6937 NME7     |
| ENSACAG00000023419 | 6938          |
| ENSACAG00000029646 | 6939 DEDD2    |
| ENSACAG00000009939 | 6940 USP54    |
| ENSACAG00000016292 | 6941 FBXO45   |
| ENSACAG00000010686 | 6942 WASF1    |
| ENSACAG00000025321 | 6943          |
| ENSACAG00000001656 | 6944 ALS2CR12 |
| ENSACAG00000013674 | 6945          |
| ENSACAG00000003671 | 6946 RAD54B   |
| ENSACAG00000008461 | 6947 EDN1     |
| ENSACAG00000015518 | 6948 CCDC50   |
| ENSACAG00000004278 | 6949          |
| ENSACAG00000013776 | 6950 BRICD5   |
| ENSACAG00000006754 | 6951 ZNRF1    |
| ENSACAG00000000640 | 6952 STAMBPL1 |
| ENSACAG00000013145 | 6953 VSTM2L   |
| ENSACAG00000006331 | 6954 ANKRD39  |
| ENSACAG00000014266 | 6955          |
| ENSACAG00000006317 | 6956 ZBTB2    |
| ENSACAG00000004950 | 6957 UBASH3B  |
| ENSACAG00000027844 | 6958          |
| ENSACAG00000017066 | 6959          |
| ENSACAG00000000301 | 6960 KLHL2    |
| ENSACAG00000008484 | 6961 SMYD1    |
| ENSACAG00000001687 | 6962          |
| ENSACAG00000005176 | 6963 SLC24A3  |
| ENSACAG00000006475 | 6964 LMAN2L   |
| ENSACAG00000025662 | 6965          |
| ENSACAG00000004352 | 6966 PELO     |
| ENSACAG00000010735 | 6967 XRCC3    |
| ENSACAG00000000271 | 6968 MSMO1    |
| ENSACAG00000008719 | 6969          |
| ENSACAG00000027909 | 6970          |

|                    |               |
|--------------------|---------------|
| ENSACAG00000012424 | 6971 CSRNP2   |
| ENSACAG00000016902 | 6972 WISP2    |
| ENSACAG00000008139 | 6973 LRRC16B  |
| ENSACAG00000007245 | 6974 SHARPIN  |
| ENSACAG00000024719 | 6975          |
| ENSACAG00000017019 | 6976 TTLL9    |
| ENSACAG00000005920 | 6977 CEP152   |
| ENSACAG00000011613 | 6978 GMEB2    |
| ENSACAG00000001663 | 6979 IMPACT   |
| ENSACAG00000026359 | 6980 GPATCH4  |
| ENSACAG00000016737 | 6981          |
| ENSACAG00000009515 | 6982 C8orf4   |
| ENSACAG00000015296 | 6983 DDX55    |
| ENSACAG00000024589 | 6984          |
| ENSACAG00000002555 | 6985 C11orf73 |
| ENSACAG00000014586 | 6986          |
| ENSACAG00000003813 | 6987 PRMT9    |
| ENSACAG00000003611 | 6988 ADPRHL2  |
| ENSACAG00000022320 | 6989          |
| ENSACAG00000010952 | 6990 DHX16    |
| ENSACAG00000007262 | 6991          |
| ENSACAG00000006105 | 6992 GALT     |
| ENSACAG00000001301 | 6993 POT1     |
| ENSACAG00000001725 | 6994 PARP4    |
| ENSACAG00000001347 | 6995 STRADB   |
| ENSACAG00000013382 | 6996 STK16    |
| ENSACAG00000013225 | 6997 IKBIP    |
| ENSACAG00000013472 | 6998 VAT1     |
| ENSACAG00000001264 | 6999 SLC12A9  |
| ENSACAG00000003151 | 7000 CIRH1A   |
| ENSACAG00000017095 | 7001 FAM219B  |
| ENSACAG00000000856 | 7002 APLF     |
| ENSACAG00000000260 | 7003 CPE      |
| ENSACAG00000012155 | 7004          |
| ENSACAG00000007202 | 7005 REEP2    |
| ENSACAG00000013104 | 7006 CNTN5    |
| ENSACAG00000002222 | 7007 DAAM2    |
| ENSACAG00000012929 | 7008 ZNF367   |
| ENSACAG00000015622 | 7009 PCYOX1L  |
| ENSACAG00000005001 | 7010          |
| ENSACAG00000001231 | 7011 LSM10    |
| ENSACAG00000000204 | 7012 CACNG1   |

|                    |              |
|--------------------|--------------|
| ENSACAG00000014340 | 7013 ZDHHC7  |
| ENSACAG00000012585 | 7014 PM20D1  |
| ENSACAG00000005038 | 7015 SLC10A3 |
| ENSACAG00000025440 | 7016         |
| ENSACAG00000008644 | 7017 SAMD11  |
| ENSACAG00000008125 | 7018 USP39   |
| ENSACAG00000001503 | 7019 CDC7    |
| ENSACAG00000006242 | 7020 KIF14   |
| ENSACAG00000010235 | 7021 ELOVL6  |
| ENSACAG00000008636 | 7022 TTC5    |
| ENSACAG00000001401 | 7023 SYT14   |
| ENSACAG00000000268 | 7024 SERINC2 |
| ENSACAG00000002182 | 7025 TUBGCP6 |
| ENSACAG00000014302 | 7026 LONP2   |
| ENSACAG00000004984 | 7027 PCDH9   |
| ENSACAG00000011028 | 7028 DCP1A   |
| ENSACAG00000009797 | 7029 PLEKHM3 |
| ENSACAG00000007023 | 7030         |
| ENSACAG00000012078 | 7031 PLK1    |
| ENSACAG00000007658 | 7032 PEX5    |
| ENSACAG00000028967 | 7033 FAM183A |
| ENSACAG00000019419 | 7034         |
| ENSACAG00000002130 | 7035 HHIPL2  |
| ENSACAG00000024802 | 7036 TBC1D4  |
| ENSACAG00000029169 | 7037 TMEM18  |
| ENSACAG00000022745 | 7038         |
| ENSACAG00000011107 | 7039 MED28   |
| ENSACAG00000012913 | 7040 FAM60A  |
| ENSACAG00000004931 | 7041 WDR44   |
| ENSACAG00000001115 | 7042         |
| ENSACAG00000013154 | 7043 TTI1    |
| ENSACAG00000021690 | 7044 SNORA30 |
| ENSACAG00000000959 | 7045 SEPHS1  |
| ENSACAG00000013017 | 7046 ABCB6   |
| ENSACAG00000000278 | 7047 OTULIN  |
| ENSACAG00000010895 | 7048 HOXC9   |
| ENSACAG00000010647 | 7049         |
| ENSACAG00000013527 | 7050 ITPKC   |
| ENSACAG00000001461 | 7051 PPM1F   |
| ENSACAG00000011157 | 7052 MSANTD4 |
| ENSACAG00000017760 | 7053         |
| ENSACAG00000005509 | 7054 TXNDC11 |



|                    |                 |
|--------------------|-----------------|
| ENSACAG00000016462 | 7055            |
| ENSACAG00000004472 | 7056 ST8SIA4    |
| ENSACAG00000013480 | 7057 TRIM24     |
| ENSACAG00000015819 | 7058 CDC42EP1   |
| ENSACAG00000001638 | 7059 ZC3HC1     |
| ENSACAG00000007162 | 7060 CISH       |
| ENSACAG00000006498 | 7061            |
| ENSACAG00000024372 | 7062 C4orf32    |
| ENSACAG00000002916 | 7063            |
| ENSACAG00000009548 | 7064 DYRK4      |
| ENSACAG00000010116 | 7065            |
| ENSACAG00000017468 | 7066 IKZF5      |
| ENSACAG00000002628 | 7067 MEST       |
| ENSACAG00000010745 | 7068 DCTPP1     |
| ENSACAG00000002397 | 7069            |
| ENSACAG00000015225 | 7070 C3orf38    |
| ENSACAG00000014309 | 7071 RPAIN      |
| ENSACAG00000008079 | 7072 ACBD5      |
| ENSACAG00000006047 | 7073 COPG1      |
| ENSACAG00000029101 | 7074            |
| ENSACAG00000008033 | 7075 PNP        |
| ENSACAG00000015904 | 7076 TTLL1      |
| ENSACAG00000010094 | 7077 RFNG       |
| ENSACAG00000008411 | 7078 ST6GALNAC2 |
| ENSACAG00000006874 | 7079 IBA57      |
| ENSACAG00000005218 | 7080            |
| ENSACAG00000007354 | 7081 FAM114A1   |
| ENSACAG00000007923 | 7082 RXRA       |
| ENSACAG00000002573 | 7083 MRM1       |
| ENSACAG00000014776 | 7084 TLCD2      |
| ENSACAG00000005335 | 7085            |
| ENSACAG00000012044 | 7086 COPS7B     |
| ENSACAG00000011503 | 7087 MLXIP      |
| ENSACAG00000003703 | 7088            |
| ENSACAG00000011688 | 7089 RNF40      |
| ENSACAG00000017714 | 7090            |
| ENSACAG00000005080 | 7091 USPL1      |
| ENSACAG00000015110 | 7092 PRPF4      |
| ENSACAG00000005056 | 7093 L3MBTL2    |
| ENSACAG00000010374 | 7094 FAM204A    |
| ENSACAG00000023371 | 7095            |
| ENSACAG00000029165 | 7096            |

|                    |               |
|--------------------|---------------|
| ENSACAG00000013051 | 7097 RNFT1    |
| ENSACAG00000019095 | 7098 snoR38   |
| ENSACAG00000003082 | 7099 GTDC1    |
| ENSACAG00000005084 | 7100 COL1A1   |
| ENSACAG00000005815 | 7101          |
| ENSACAG00000028672 | 7102          |
| ENSACAG00000015570 | 7103 INPPL1   |
| ENSACAG00000011273 | 7104          |
| ENSACAG00000002283 | 7105 MTX1     |
| ENSACAG00000009309 | 7106 FAM160B1 |
| ENSACAG00000005528 | 7107 SH2B1    |
| ENSACAG00000000281 | 7108 MKNK2    |
| ENSACAG00000009721 | 7109 MAP2K1   |
| ENSACAG00000004296 | 7110 ZBTB18   |
| ENSACAG00000009055 | 7111 BCO1     |
| ENSACAG00000015895 | 7112 STEAP2   |
| ENSACAG00000015323 | 7113 HIST1H4F |
| ENSACAG00000015357 | 7114 TULP3    |
| ENSACAG00000009068 | 7115 SPTB     |
| ENSACAG00000015018 | 7116 MSX2     |
| ENSACAG00000029153 | 7117 C1orf131 |
| ENSACAG00000007048 | 7118 RNF144A  |
| ENSACAG00000004446 | 7119          |
| ENSACAG00000009633 | 7120 TEFM     |
| ENSACAG00000008600 | 7121 GOLGA1   |
| ENSACAG00000009428 | 7122          |
| ENSACAG00000026128 | 7123          |
| ENSACAG00000002161 | 7124 GGCX     |
| ENSACAG00000008167 | 7125 LMBRD1   |
| ENSACAG00000015254 | 7126 FOXO4    |
| ENSACAG00000017959 | 7127 PCMTD1   |
| ENSACAG00000011336 | 7128 TBL2     |
| ENSACAG00000015921 | 7129 MREG     |
| ENSACAG00000008620 | 7130 HTRA2    |
| ENSACAG00000007922 | 7131 SUN2     |
| ENSACAG00000009638 | 7132 NAB2     |
| ENSACAG00000024229 | 7133          |
| ENSACAG00000016829 | 7134 ALG11    |
| ENSACAG00000000318 | 7135 ZNF507   |
| ENSACAG00000004740 | 7136 WHAMM    |
| ENSACAG00000020454 | 7137 SNORD81  |
| ENSACAG00000001325 | 7138 TSKU     |

|                    |                 |
|--------------------|-----------------|
| ENSACAG00000006753 | 7139            |
| ENSACAG00000006606 | 7140 IFT57      |
| ENSACAG00000008475 | 7141 SNTA1      |
| ENSACAG00000001048 | 7142            |
| ENSACAG00000007235 | 7143            |
| ENSACAG00000002131 | 7144            |
| ENSACAG00000006550 | 7145 RPP40      |
| ENSACAG00000004782 | 7146 TOB2       |
| ENSACAG00000009875 | 7147 SLC6A11    |
| ENSACAG00000013601 | 7148 ANKRD44    |
| ENSACAG00000011949 | 7149 ZFAT       |
| ENSACAG00000025087 | 7150            |
| ENSACAG00000014436 | 7151            |
| ENSACAG00000011207 | 7152 GTF3C6     |
| ENSACAG00000014575 | 7153 COG1       |
| ENSACAG00000010477 | 7154 SLC19A1    |
| ENSACAG00000016918 | 7155 PEX7       |
| ENSACAG00000010395 | 7156 GNL1       |
| ENSACAG00000001560 | 7157 RWDD2B     |
| ENSACAG00000005486 | 7158 MYSM1      |
| ENSACAG00000027421 | 7159            |
| ENSACAG00000007632 | 7160 PIM2       |
| ENSACAG00000013447 | 7161 CCDC22     |
| ENSACAG00000002260 | 7162 DMXL2      |
| ENSACAG00000028964 | 7163 CDKN2AIPNL |
| ENSACAG00000001276 | 7164 SIDT2      |
| ENSACAG00000005119 | 7165 KATNAL1    |
| ENSACAG00000000535 | 7166 CLN5       |
| ENSACAG00000004144 | 7167 ATP13A3    |
| ENSACAG00000015787 | 7168            |
| ENSACAG00000022046 | 7169 CDC42EP2   |
| ENSACAG00000006579 | 7170 MTUS1      |
| ENSACAG00000022698 | 7171 PPP1R26    |
| ENSACAG00000011610 | 7172            |
| ENSACAG00000016313 | 7173 MCOLN1     |
| ENSACAG00000027644 | 7174 MPV17L2    |
| ENSACAG00000015314 | 7175 TMEM87A    |
| ENSACAG00000006503 | 7176 C11orf1    |
| ENSACAG00000004081 | 7177            |
| ENSACAG00000016004 | 7178 FLAD1      |
| ENSACAG00000013013 | 7179 PLEKHM1    |
| ENSACAG00000000384 | 7180 TRIB2      |

|                    |               |
|--------------------|---------------|
| ENSACAG00000016563 | 7181 GLS2     |
| ENSACAG00000010130 | 7182          |
| ENSACAG00000001591 | 7183 CAMLG    |
| ENSACAG00000015702 | 7184 SLC30A4  |
| ENSACAG00000000724 | 7185 ALS2     |
| ENSACAG00000026984 | 7186 CACNB3   |
| ENSACAG00000002994 | 7187 VPS52    |
| ENSACAG00000011626 | 7188          |
| ENSACAG00000009635 | 7189 SPAG16   |
| ENSACAG00000023758 | 7190 SUGP2    |
| ENSACAG00000013125 | 7191 C16orf70 |
| ENSACAG00000027415 | 7192          |
| ENSACAG00000007181 | 7193          |
| ENSACAG00000012826 | 7194 FAM122B  |
| ENSACAG00000027058 | 7195          |
| ENSACAG00000021147 | 7196          |
| ENSACAG00000024616 | 7197          |
| ENSACAG00000016528 | 7198          |
| ENSACAG00000005869 | 7199 CCDC115  |
| ENSACAG00000004016 | 7200          |
| ENSACAG00000025418 | 7201          |
| ENSACAG00000014132 | 7202          |
| ENSACAG00000015699 | 7203 MYNN     |
| ENSACAG00000011181 | 7204          |
| ENSACAG00000011163 | 7205 ADCK2    |
| ENSACAG00000017765 | 7206 SNAPC3   |
| ENSACAG00000000943 | 7207 PRICKLE2 |
| ENSACAG00000009315 | 7208 PDCL2    |
| ENSACAG00000012940 | 7209 MYO18A   |
| ENSACAG00000004865 | 7210 ZNF639   |
| ENSACAG00000029204 | 7211 CEP72    |
| ENSACAG00000028860 | 7212 ATOX1    |
| ENSACAG00000013752 | 7213 ARFRP1   |
| ENSACAG00000004434 | 7214 MYRIP    |
| ENSACAG00000001703 | 7215 MAP2K3   |
| ENSACAG00000002705 | 7216 GPLD1    |
| ENSACAG00000001344 | 7217 CERS6    |
| ENSACAG00000007386 | 7218 SHPRH    |
| ENSACAG00000003621 | 7219 ZNF407   |
| ENSACAG00000001098 | 7220 RAB30    |
| ENSACAG00000015155 | 7221 TMEM80   |
| ENSACAG00000009881 | 7222 SAMD1    |

|                    |               |
|--------------------|---------------|
| ENSACAG00000011286 | 7223 GABRG3   |
| ENSACAG00000003627 | 7224 SLC35A3  |
| ENSACAG00000008599 | 7225 SAMD8    |
| ENSACAG00000013823 | 7226 SNX16    |
| ENSACAG00000007587 | 7227 DCP2     |
| ENSACAG00000005216 | 7228 WNT9A    |
| ENSACAG00000009069 | 7229 ATRNL1   |
| ENSACAG00000013058 | 7230          |
| ENSACAG00000016223 | 7231          |
| ENSACAG00000012579 | 7232 AGR3     |
| ENSACAG00000000667 | 7233 GLTSCR1L |
| ENSACAG00000018274 | 7234          |
| ENSACAG00000003819 | 7235 GCN1     |
| ENSACAG00000000821 | 7236 LPCAT1   |
| ENSACAG00000002616 | 7237 ALDH5A1  |
| ENSACAG00000002034 | 7238 CCDC138  |
| ENSACAG00000006187 | 7239 CCNB3    |
| ENSACAG00000013595 | 7240 PYGL     |
| ENSACAG00000007805 | 7241 CCS      |
| ENSACAG00000006506 | 7242 VIPR1    |
| ENSACAG00000008189 | 7243 PIGQ     |
| ENSACAG00000002814 | 7244 MIS18A   |
| ENSACAG00000025649 | 7245          |
| ENSACAG00000013420 | 7246 SPRY4    |
| ENSACAG00000004302 | 7247 MFAP3    |
| ENSACAG00000002149 | 7248 ARHGEF5  |
| ENSACAG00000003580 | 7249 MAATS1   |
| ENSACAG00000015828 | 7250 NEK1     |
| ENSACAG00000011360 | 7251 RABGAP1  |
| ENSACAG00000005470 | 7252 C12orf10 |
| ENSACAG00000004519 | 7253 PDE8A    |
| ENSACAG00000015453 | 7254 GCAT     |
| ENSACAG00000006174 | 7255 PROX1    |
| ENSACAG00000016231 | 7256 SULT4A1  |
| ENSACAG00000002791 | 7257 TCTE3    |
| ENSACAG00000007294 | 7258 FRA10AC1 |
| ENSACAG00000006651 | 7259 COPZ2    |
| ENSACAG00000019595 | 7260 7SK      |
| ENSACAG00000012889 | 7261          |
| ENSACAG00000001365 | 7262 TMC7     |
| ENSACAG00000013873 | 7263 RCN3     |
| ENSACAG00000024153 | 7264          |

|                    |               |
|--------------------|---------------|
| ENSACAG00000000307 | 7265 CDS2     |
| ENSACAG00000012505 | 7266 APBB1    |
| ENSACAG00000004752 | 7267 DPP8     |
| ENSACAG00000006437 | 7268 PAQR3    |
| ENSACAG00000012983 | 7269 PTCH1    |
| ENSACAG00000015517 | 7270 ARL15    |
| ENSACAG00000000955 | 7271 QSOX1    |
| ENSACAG00000009399 | 7272 ABLIM1   |
| ENSACAG00000014244 | 7273 ELK4     |
| ENSACAG00000029581 | 7274 MDC1     |
| ENSACAG00000005719 | 7275 FDXR     |
| ENSACAG00000006045 | 7276 DCUN1D4  |
| ENSACAG00000022877 | 7277          |
| ENSACAG00000000988 | 7278 PLEKHA8  |
| ENSACAG00000001165 | 7279 LPAR1    |
| ENSACAG00000015729 | 7280 ALDH1L2  |
| ENSACAG00000028515 | 7281          |
| ENSACAG00000005894 | 7282          |
| ENSACAG00000003932 | 7283 CEP162   |
| ENSACAG00000005005 | 7284 ZMAT3    |
| ENSACAG00000011959 | 7285 AP3B2    |
| ENSACAG00000000757 | 7286 POLE2    |
| ENSACAG00000006673 | 7287 EXOC6    |
| ENSACAG00000015816 | 7288 TTBK2    |
| ENSACAG00000002349 | 7289 ANKS6    |
| ENSACAG00000005832 | 7290 WDPCP    |
| ENSACAG00000005179 | 7291 COMMD9   |
| ENSACAG00000013073 | 7292 USP42    |
| ENSACAG00000009002 | 7293 DSCC1    |
| ENSACAG00000001422 | 7294 UGGT2    |
| ENSACAG00000008957 | 7295          |
| ENSACAG00000016294 | 7296 P2RX4    |
| ENSACAG00000003497 | 7297 TERF2    |
| ENSACAG00000007079 | 7298 TBKBP1   |
| ENSACAG00000007938 | 7299          |
| ENSACAG00000002370 | 7300 CADPS    |
| ENSACAG00000008029 | 7301 DNMT3A   |
| ENSACAG00000001682 | 7302 ARHGAP39 |
| ENSACAG00000000186 | 7303 PUS3     |
| ENSACAG00000024505 | 7304          |
| ENSACAG00000012571 | 7305          |
| ENSACAG00000001988 | 7306 GEMIN8   |

|                    |               |
|--------------------|---------------|
| ENSACAG00000010949 | 7307 FAM175A  |
| ENSACAG00000006627 | 7308 RFWD3    |
| ENSACAG00000003093 | 7309 DNAJC10  |
| ENSACAG00000010400 | 7310 C2orf49  |
| ENSACAG00000024618 | 7311 UBAP1L   |
| ENSACAG00000006664 | 7312 SEC22C   |
| ENSACAG00000025709 | 7313          |
| ENSACAG00000007419 | 7314 PIK3C2B  |
| ENSACAG00000015568 | 7315 C7orf26  |
| ENSACAG00000010703 | 7316          |
| ENSACAG00000024790 | 7317          |
| ENSACAG00000008936 | 7318 TREX1    |
| ENSACAG00000012695 | 7319 PKD2     |
| ENSACAG00000008603 | 7320 UBE3B    |
| ENSACAG00000003428 | 7321 HOOK2    |
| ENSACAG00000024425 | 7322 EMC1     |
| ENSACAG00000009733 | 7323 TGIF2    |
| ENSACAG00000006957 | 7324 CDC25C   |
| ENSACAG00000001857 | 7325 GNE      |
| ENSACAG00000014861 | 7326 SURF1    |
| ENSACAG00000002046 | 7327 DDHD2    |
| ENSACAG00000006244 | 7328 VASH2    |
| ENSACAG00000008709 | 7329 KAT6B    |
| ENSACAG00000008352 | 7330 GPATCH11 |
| ENSACAG00000001332 | 7331 ENKD1    |
| ENSACAG00000001341 | 7332 N6AMT1   |
| ENSACAG00000008024 | 7333 NCAPH    |
| ENSACAG00000012192 | 7334 AFF1     |
| ENSACAG00000026750 | 7335          |
| ENSACAG00000016394 | 7336 ADCY9    |
| ENSACAG00000014304 | 7337 IFT122   |
| ENSACAG00000001944 | 7338 DZIP1    |
| ENSACAG00000017430 | 7339          |
| ENSACAG00000006671 | 7340 CASKIN2  |
| ENSACAG00000013087 | 7341 ENPP4    |
| ENSACAG00000023984 | 7342          |
| ENSACAG00000003343 | 7343 TTC26    |
| ENSACAG00000014540 | 7344 OSBPL10  |
| ENSACAG00000010189 | 7345 GTPBP8   |
| ENSACAG00000017894 | 7346 FUNDC1   |
| ENSACAG00000000665 | 7347 ING5     |
| ENSACAG00000007501 | 7348 TPRA1    |

|                    |               |
|--------------------|---------------|
| ENSACAG00000017728 | 7349 TCF3     |
| ENSACAG00000010502 | 7350 SLC18B1  |
| ENSACAG00000008385 | 7351 CCDC25   |
| ENSACAG00000006700 | 7352 BRD8     |
| ENSACAG00000014600 | 7353 SLC36A4  |
| ENSACAG00000005289 | 7354 KLHDC3   |
| ENSACAG00000001871 | 7355 KDM2B    |
| ENSACAG00000012231 | 7356 NARS2    |
| ENSACAG00000012703 | 7357 HIGD1C   |
| ENSACAG00000016371 | 7358 TRAF5    |
| ENSACAG00000005759 | 7359 ARHGEF3  |
| ENSACAG00000014492 | 7360 LDB3     |
| ENSACAG00000005103 | 7361          |
| ENSACAG00000012252 | 7362 KLHL8    |
| ENSACAG00000023207 | 7363          |
| ENSACAG00000002263 | 7364          |
| ENSACAG00000000351 | 7365 MYO10    |
| ENSACAG00000008238 | 7366 ZFHX3    |
| ENSACAG00000010687 | 7367 SLC44A4  |
| ENSACAG00000002966 | 7368 RNF145   |
| ENSACAG00000013448 | 7369 SEC24D   |
| ENSACAG00000008129 | 7370          |
| ENSACAG00000028299 | 7371          |
| ENSACAG00000017369 | 7372 DDA1     |
| ENSACAG00000017213 | 7373 C1orf109 |
| ENSACAG00000017374 | 7374 INIP     |
| ENSACAG00000014434 | 7375 TMCC2    |
| ENSACAG00000007653 | 7376 MCC      |
| ENSACAG00000007906 | 7377 PIGA     |
| ENSACAG00000002771 | 7378 MADD     |
| ENSACAG00000001404 | 7379          |
| ENSACAG00000010817 | 7380 DPH1     |
| ENSACAG00000008493 | 7381 MED30    |
| ENSACAG00000012646 | 7382 BZW2     |
| ENSACAG00000008539 | 7383 ABCD1    |
| ENSACAG00000005718 | 7384 QRSL1    |
| ENSACAG00000012786 | 7385          |
| ENSACAG00000008661 | 7386 GOLPH3L  |
| ENSACAG00000016229 | 7387 PREX2    |
| ENSACAG00000003892 | 7388 ADAMTS4  |
| ENSACAG00000022028 | 7389          |
| ENSACAG00000010793 | 7390          |



|                    |                |
|--------------------|----------------|
| ENSACAG00000028453 | 7391 PLCXD2    |
| ENSACAG00000018342 | 7392 5S_rRNA   |
| ENSACAG00000016728 | 7393           |
| ENSACAG00000004612 | 7394 SMARCAL1  |
| ENSACAG00000017074 | 7395 PRKRIR    |
| ENSACAG00000011083 | 7396 INTS1     |
| ENSACAG00000026975 | 7397 TSC22D1   |
| ENSACAG00000017705 | 7398 DUSP22    |
| ENSACAG00000014661 | 7399 CDIPT     |
| ENSACAG00000014843 | 7400 USP31     |
| ENSACAG00000023005 | 7401           |
| ENSACAG00000000369 | 7402 ISCA1     |
| ENSACAG00000027642 | 7403 PARVB     |
| ENSACAG00000014683 | 7404 TOMM20L   |
| ENSACAG00000012712 | 7405 BICD1     |
| ENSACAG00000022883 | 7406           |
| ENSACAG00000026863 | 7407 HERPUD1   |
| ENSACAG00000008246 | 7408 TBC1D20   |
| ENSACAG00000003252 | 7409 MSTO1     |
| ENSACAG00000008996 | 7410 ELOVL7    |
| ENSACAG00000016030 | 7411           |
| ENSACAG00000015457 | 7412 ORMDL2    |
| ENSACAG00000001486 | 7413 TMBIM1    |
| ENSACAG00000004214 | 7414 MIS18BP1  |
| ENSACAG00000003132 | 7415 DDB2      |
| ENSACAG00000002302 | 7416 GALNT12   |
| ENSACAG00000016717 | 7417 CHCHD10   |
| ENSACAG00000005060 | 7418           |
| ENSACAG00000012861 | 7419 TMEM2     |
| ENSACAG00000012947 | 7420 ERCC6L2   |
| ENSACAG00000016807 | 7421 ARL16     |
| ENSACAG00000005406 | 7422 BCAR3     |
| ENSACAG00000017105 | 7423 STXBP2    |
| ENSACAG00000007711 | 7424 RNF149    |
| ENSACAG00000001830 | 7425 PITPNA    |
| ENSACAG00000003114 | 7426 RAB40C    |
| ENSACAG00000002654 | 7427 RAB11FIP3 |
| ENSACAG00000003410 | 7428 GNPTG     |
| ENSACAG00000008565 | 7429 EXOC3     |
| ENSACAG00000013112 | 7430 SYDE2     |
| ENSACAG00000023102 | 7431 PLIN5     |
| ENSACAG00000012132 | 7432 SLC25A20  |

|                    |               |
|--------------------|---------------|
| ENSACAG00000006210 | 7433 CLCN5    |
| ENSACAG00000011518 | 7434 MFSD8    |
| ENSACAG00000003139 | 7435 CHD8     |
| ENSACAG00000000919 | 7436 BOK      |
| ENSACAG00000010498 | 7437 COQ3     |
| ENSACAG00000002500 | 7438 GPR180   |
| ENSACAG00000002414 | 7439 CSPG4    |
| ENSACAG00000013901 | 7440          |
| ENSACAG00000006069 | 7441          |
| ENSACAG00000014756 | 7442          |
| ENSACAG00000010947 | 7443          |
| ENSACAG00000014739 | 7444 MAPK8IP1 |
| ENSACAG00000008934 | 7445 MYO1C    |
| ENSACAG00000017997 | 7446          |
| ENSACAG00000017609 | 7447 YAE1D1   |
| ENSACAG00000007117 | 7448          |
| ENSACAG00000000871 | 7449 PLEK     |
| ENSACAG00000009916 | 7450 LYSMD4   |
| ENSACAG00000007537 | 7451 TBC1D32  |
| ENSACAG00000006313 | 7452 MTMR7    |
| ENSACAG00000016633 | 7453 LRRC1    |
| ENSACAG00000006480 | 7454          |
| ENSACAG00000007492 | 7455 NICN1    |
| ENSACAG00000013944 | 7456 C15orf57 |
| ENSACAG00000003737 | 7457 ZBTB33   |
| ENSACAG00000014193 | 7458 SP4      |
| ENSACAG00000011966 | 7459          |
| ENSACAG00000017145 | 7460 OSBPL6   |
| ENSACAG00000009282 | 7461 TRUB1    |
| ENSACAG00000008947 | 7462          |
| ENSACAG00000015996 | 7463 SLC29A3  |
| ENSACAG00000005582 | 7464 CRBN     |
| ENSACAG00000002811 | 7465 SNRNP48  |
| ENSACAG00000012256 | 7466 TUBGCP5  |
| ENSACAG00000015343 | 7467 ENTHD2   |
| ENSACAG00000012129 | 7468          |
| ENSACAG00000002868 | 7469          |
| ENSACAG00000022638 | 7470          |
| ENSACAG00000008954 | 7471 ITGA4    |
| ENSACAG00000001819 | 7472 AAR2     |
| ENSACAG00000017247 | 7473 CCHCR1   |
| ENSACAG00000010202 | 7474 DOC2A    |

|                    |              |
|--------------------|--------------|
| ENSACAG00000013975 | 7475 CPSF3L  |
| ENSACAG00000007086 | 7476 CPVL    |
| ENSACAG00000004149 | 7477 FANCM   |
| ENSACAG00000007486 | 7478 KIF18B  |
| ENSACAG00000013906 | 7479         |
| ENSACAG00000015515 | 7480 GULP1   |
| ENSACAG00000002177 | 7481 MAGI1   |
| ENSACAG00000025738 | 7482         |
| ENSACAG00000003250 | 7483 MTIF3   |
| ENSACAG00000007369 | 7484 ABTB1   |
| ENSACAG00000013999 | 7485 POF1B   |
| ENSACAG00000028153 | 7486         |
| ENSACAG00000010230 | 7487 TTC33   |
| ENSACAG00000004874 | 7488 NAA60   |
| ENSACAG00000014783 | 7489 PIK3CG  |
| ENSACAG00000014354 | 7490 ADAMTS5 |
| ENSACAG00000005536 | 7491         |
| ENSACAG00000004061 | 7492 FAXDC2  |
| ENSACAG00000008593 | 7493 ASRGL1  |
| ENSACAG00000013773 | 7494 MEGF9   |
| ENSACAG00000016259 | 7495 IMP3    |
| ENSACAG00000008244 | 7496 TICRR   |
| ENSACAG00000017967 | 7497 COASY   |
| ENSACAG00000011690 | 7498 ITPR2   |
| ENSACAG00000006145 | 7499 PARP6   |
| ENSACAG00000009345 | 7500 TRMT61B |
| ENSACAG00000012205 | 7501 MCM7    |
| ENSACAG00000000653 | 7502 SLC45A4 |
| ENSACAG00000026182 | 7503         |
| ENSACAG00000025006 | 7504         |
| ENSACAG00000001019 | 7505         |
| ENSACAG00000001810 | 7506 CDKL1   |
| ENSACAG00000001512 | 7507         |
| ENSACAG00000008965 | 7508 SAMD4B  |
| ENSACAG00000008655 | 7509         |
| ENSACAG00000002217 | 7510         |
| ENSACAG00000008296 | 7511 TEP1    |
| ENSACAG00000005073 | 7512 PRKCQ   |
| ENSACAG00000024994 | 7513 TRADD   |
| ENSACAG00000028589 | 7514         |
| ENSACAG00000000289 | 7515 ANKRD29 |
| ENSACAG00000000581 | 7516 SNX7    |

|                    |               |
|--------------------|---------------|
| ENSACAG00000011856 | 7517          |
| ENSACAG00000005571 | 7518 CCDC18   |
| ENSACAG00000028857 | 7519 CCDC15   |
| ENSACAG00000007124 | 7520 TSPAN12  |
| ENSACAG00000018780 | 7521 5S_rRNA  |
| ENSACAG00000016720 | 7522 PDE7A    |
| ENSACAG00000007416 | 7523 CXorf58  |
| ENSACAG00000009089 | 7524 FTSJ2    |
| ENSACAG00000003535 | 7525 CYFIP2   |
| ENSACAG00000009718 | 7526 ASB1     |
| ENSACAG00000009348 | 7527 SLC38A3  |
| ENSACAG00000010625 | 7528 POMT1    |
| ENSACAG00000014612 | 7529 CDC42EP4 |
| ENSACAG00000003913 | 7530          |
| ENSACAG00000017689 | 7531 MCM9     |
| ENSACAG00000001999 | 7532 ZDHHC16  |
| ENSACAG00000002578 | 7533 ARL9     |
| ENSACAG00000013893 | 7534 RPUSD2   |
| ENSACAG00000015389 | 7535 FRMD4B   |
| ENSACAG00000006197 | 7536 ARMC7    |
| ENSACAG00000002668 | 7537 SC5D     |
| ENSACAG00000025299 | 7538 CNKSR2   |
| ENSACAG00000006315 | 7539 TATDN3   |
| ENSACAG00000007865 | 7540 METTL17  |
| ENSACAG00000000115 | 7541 PARS2    |
| ENSACAG00000003696 | 7542          |
| ENSACAG00000001933 | 7543          |
| ENSACAG00000009149 | 7544 CMIP     |
| ENSACAG00000006676 | 7545 PPM1M    |
| ENSACAG00000008142 | 7546 CBY1     |
| ENSACAG00000006361 | 7547 STAC3    |
| ENSACAG00000029246 | 7548 CD47     |
| ENSACAG00000012866 | 7549          |
| ENSACAG00000007152 | 7550          |
| ENSACAG00000017256 | 7551 PLEKHA3  |
| ENSACAG00000013778 | 7552 PGP      |
| ENSACAG00000013019 | 7553          |
| ENSACAG00000025016 | 7554          |
| ENSACAG00000000328 | 7555          |
| ENSACAG00000003638 | 7556 MKL2     |
| ENSACAG00000010041 | 7557 SMTN     |
| ENSACAG00000015669 | 7558 TMLHE    |

|                     |               |
|---------------------|---------------|
| ENSACAG00000000302  | 7559 FBXL7    |
| ENSACAG000000006370 | 7560          |
| ENSACAG000000020781 | 7561 SNORA16  |
| ENSACAG000000005689 | 7562 CGGBP1   |
| ENSACAG000000001223 | 7563 AP4E1    |
| ENSACAG000000004280 | 7564 KIN      |
| ENSACAG000000007605 | 7565 CPLX4    |
| ENSACAG000000003689 | 7566 KIAA0430 |
| ENSACAG000000011508 | 7567 STK35    |
| ENSACAG000000016845 | 7568 COL23A1  |
| ENSACAG000000017176 | 7569 CRAT     |
| ENSACAG000000006097 | 7570 RASSF2   |
| ENSACAG000000008856 | 7571 MARS2    |
| ENSACAG000000001439 | 7572          |
| ENSACAG000000004845 | 7573 ALG14    |
| ENSACAG000000014629 | 7574 ATXN7L1  |
| ENSACAG000000002602 | 7575          |
| ENSACAG000000013043 | 7576 SVEP1    |
| ENSACAG000000027912 | 7577          |
| ENSACAG000000011250 | 7578 POR      |
| ENSACAG000000016477 | 7579 GRIPAP1  |
| ENSACAG000000000002 | 7580 CAD      |
| ENSACAG000000009320 | 7581 PRCC     |
| ENSACAG000000017456 | 7582 DEDD     |
| ENSACAG000000003268 | 7583 WRAP53   |
| ENSACAG000000002368 | 7584 HACL1    |
| ENSACAG000000011943 | 7585 INTU     |
| ENSACAG000000014484 | 7586 POGK     |
| ENSACAG000000002429 | 7587 ADIPOR1  |
| ENSACAG000000003158 | 7588 CDC14A   |
| ENSACAG000000029442 | 7589 CARNMT1  |
| ENSACAG000000011567 | 7590 AMPD2    |
| ENSACAG000000028858 | 7591 HSPB11   |
| ENSACAG000000011170 | 7592 NEFL     |
| ENSACAG000000006586 | 7593 LAYN     |
| ENSACAG000000008742 | 7594 METTL4   |
| ENSACAG000000005878 | 7595 ZFYVE26  |
| ENSACAG000000007328 | 7596 SWI5     |
| ENSACAG000000013246 | 7597 DFNA5    |
| ENSACAG000000029456 | 7598          |
| ENSACAG000000011269 | 7599 RHBDD2   |
| ENSACAG000000013356 | 7600 PEX2     |

|                    |                |
|--------------------|----------------|
| ENSACAG00000022959 | 7601           |
| ENSACAG00000001132 | 7602 ZNF618    |
| ENSACAG00000002692 | 7603 FAN1      |
| ENSACAG00000003061 | 7604           |
| ENSACAG00000012771 | 7605 NR2C1     |
| ENSACAG00000017563 | 7606 GABARAPL1 |
| ENSACAG00000010592 | 7607 POLR3D    |
| ENSACAG00000012441 | 7608 NDUFA8    |
| ENSACAG00000014995 | 7609 RASSF7    |
| ENSACAG00000013418 | 7610 CCSER1    |
| ENSACAG00000008250 | 7611 HEATR5B   |
| ENSACAG00000002210 | 7612 LRRC41    |
| ENSACAG00000007346 | 7613 NCOA5     |
| ENSACAG00000006358 | 7614 FAM185A   |
| ENSACAG00000011261 | 7615 GTF2E1    |
| ENSACAG00000002293 | 7616 CLGN      |
| ENSACAG00000006342 | 7617 WDR13     |
| ENSACAG00000027397 | 7618 SART1     |
| ENSACAG00000006573 | 7619 ILKAP     |
| ENSACAG00000004561 | 7620 FURIN     |
| ENSACAG00000017048 | 7621 PHOSPHO2  |
| ENSACAG00000013808 | 7622 SPG11     |
| ENSACAG00000009993 | 7623 NHLRC2    |
| ENSACAG00000017752 | 7624 CCDC171   |
| ENSACAG00000013812 | 7625 EDA2R     |
| ENSACAG00000017424 | 7626 SH3BGRL2  |
| ENSACAG00000004170 | 7627 RABGGTA   |
| ENSACAG00000016985 | 7628 KIAA1549  |
| ENSACAG00000012732 | 7629 TAOK1     |
| ENSACAG00000007270 | 7630 TMEM182   |
| ENSACAG00000001068 | 7631 FAM96B    |
| ENSACAG00000012694 | 7632 PRRC1     |
| ENSACAG00000003352 | 7633 CAPN15    |
| ENSACAG00000011574 | 7634 POLQ      |
| ENSACAG00000028633 | 7635 ATF7IP2   |
| ENSACAG00000011923 | 7636 DYNC2H1   |
| ENSACAG00000017800 | 7637           |
| ENSACAG00000008948 | 7638           |
| ENSACAG00000017405 | 7639 CCDC141   |
| ENSACAG00000014555 | 7640           |
| ENSACAG00000008562 | 7641 RAD1      |
| ENSACAG00000001397 | 7642           |

|                    |                     |
|--------------------|---------------------|
| ENSACAG00000014158 | 7643 TCEANC2        |
| ENSACAG00000003409 | 7644 DBT            |
| ENSACAG00000023145 | 7645 snoMe28S-U3344 |
| ENSACAG00000004592 | 7646                |
| ENSACAG00000004973 | 7647 PARN           |
| ENSACAG00000005699 | 7648 DNER           |
| ENSACAG00000002330 | 7649 MANEA          |
| ENSACAG00000003501 | 7650 SMPD4          |
| ENSACAG00000012741 | 7651                |
| ENSACAG00000024701 | 7652                |
| ENSACAG00000014573 | 7653 RINT1          |
| ENSACAG00000012467 | 7654 NELFB          |
| ENSACAG00000012887 | 7655 NUFIP2         |
| ENSACAG00000017873 | 7656                |
| ENSACAG00000008543 | 7657                |
| ENSACAG00000027273 | 7658                |
| ENSACAG00000005153 | 7659 MRGBP          |
| ENSACAG00000012162 | 7660 TRMT10A        |
| ENSACAG00000003128 | 7661 SPECC1L        |
| ENSACAG00000025977 | 7662                |
| ENSACAG00000017417 | 7663 HLF            |
| ENSACAG00000006350 | 7664 ARL10          |
| ENSACAG00000008188 | 7665 TRIB3          |
| ENSACAG00000014503 | 7666                |
| ENSACAG00000009884 | 7667 ST5            |
| ENSACAG00000001886 | 7668 KANSL3         |
| ENSACAG00000008012 | 7669 CCDC112        |
| ENSACAG00000009356 | 7670 SPDYA          |
| ENSACAG00000004020 | 7671 SPOCK1         |
| ENSACAG00000004997 | 7672 HSPBAP1        |
| ENSACAG00000028700 | 7673                |
| ENSACAG00000023649 | 7674                |
| ENSACAG00000014267 | 7675 POLD3          |
| ENSACAG00000008228 | 7676 SFMBT1         |
| ENSACAG00000004948 | 7677 TMEM101        |
| ENSACAG00000002518 | 7678 N6AMT2         |
| ENSACAG00000009415 | 7679 SF3A1          |
| ENSACAG00000001175 | 7680 FBXL18         |
| ENSACAG00000008508 | 7681 GSTCD          |
| ENSACAG00000006483 | 7682 SCLY           |
| ENSACAG00000025421 | 7683                |
| ENSACAG00000008808 | 7684 SLC12A6        |

|                    |              |
|--------------------|--------------|
| ENSACAG00000008474 | 7685         |
| ENSACAG00000015876 | 7686 RASGRP1 |
| ENSACAG00000026774 | 7687         |
| ENSACAG00000015209 | 7688         |
| ENSACAG00000017003 | 7689         |
| ENSACAG00000004076 | 7690 CCDC9   |
| ENSACAG00000029142 | 7691         |
| ENSACAG00000029675 | 7692         |
| ENSACAG00000011778 | 7693         |
| ENSACAG00000010035 | 7694 BRPF1   |
| ENSACAG00000004541 | 7695 BRCA2   |
| ENSACAG00000012894 | 7696         |
| ENSACAG00000002098 | 7697 LRCH4   |
| ENSACAG00000017508 | 7698 MRPL32  |
| ENSACAG00000001207 | 7699 DCLRE1C |
| ENSACAG00000023898 | 7700         |
| ENSACAG00000006590 | 7701 ZNF451  |
| ENSACAG00000011765 | 7702 CXCL12  |
| ENSACAG00000014168 | 7703 GALNT11 |
| ENSACAG00000005098 | 7704 FBN1    |
| ENSACAG00000007088 | 7705 RDH14   |
| ENSACAG00000014275 | 7706 BLM     |
| ENSACAG00000001502 | 7707 SIK3    |
| ENSACAG00000008899 | 7708         |
| ENSACAG00000005239 | 7709 BFAR    |
| ENSACAG00000013865 | 7710 KCNH7   |
| ENSACAG00000016215 | 7711 CANT1   |
| ENSACAG00000000836 | 7712         |
| ENSACAG00000010132 | 7713 TMEM147 |
| ENSACAG00000000803 | 7714 NDUFA5  |
| ENSACAG00000008279 | 7715 ZNF362  |
| ENSACAG00000010838 | 7716 CDH2    |
| ENSACAG00000004075 | 7717         |
| ENSACAG00000013555 | 7718 MTMR2   |
| ENSACAG00000006469 | 7719 DNAJB4  |
| ENSACAG00000017847 | 7720         |
| ENSACAG00000001595 | 7721 PLEKHN1 |
| ENSACAG00000029112 | 7722 HBEGF   |
| ENSACAG00000005053 | 7723 SEMA5B  |
| ENSACAG00000016115 | 7724 RUNDC3B |
| ENSACAG00000022279 | 7725 BAG4    |
| ENSACAG00000008027 | 7726 MOCS2   |



|                    |               |
|--------------------|---------------|
| ENSACAG00000000936 | 7727 OCRL     |
| ENSACAG00000000989 | 7728 SS18L2   |
| ENSACAG00000007450 | 7729 MCCC1    |
| ENSACAG00000006126 | 7730 BLNK     |
| ENSACAG00000014413 | 7731 SIAH1    |
| ENSACAG00000016326 | 7732 KDEL1    |
| ENSACAG00000014122 | 7733 CNTFR    |
| ENSACAG00000014433 | 7734 TMEM132C |
| ENSACAG00000017473 | 7735 MYOCD    |
| ENSACAG00000016167 | 7736          |
| ENSACAG00000008945 | 7737 PLD2     |
| ENSACAG00000005244 | 7738 TFB1M    |
| ENSACAG00000008310 | 7739 GCDH     |
| ENSACAG00000001945 | 7740 TCTN1    |
| ENSACAG00000002504 | 7741 TBC1D9   |
| ENSACAG00000008516 | 7742          |
| ENSACAG00000017850 | 7743 DSG2     |
| ENSACAG00000016580 | 7744 WDR45    |
| ENSACAG00000016773 | 7745 ATG101   |
| ENSACAG00000025816 | 7746          |
| ENSACAG00000019225 | 7747 SNORA5   |
| ENSACAG00000002888 | 7748 PARK2    |
| ENSACAG00000003564 | 7749 RGL2     |
| ENSACAG00000013960 | 7750 YIPF6    |
| ENSACAG00000028578 | 7751 APOBEC1  |
| ENSACAG00000008338 | 7752 EDEM2    |
| ENSACAG00000008852 | 7753 NGLY1    |
| ENSACAG00000003713 | 7754          |
| ENSACAG00000009540 | 7755 NFKB1B   |
| ENSACAG00000010225 | 7756          |
| ENSACAG00000016768 | 7757          |
| ENSACAG00000004542 | 7758 TMEM38B  |
| ENSACAG00000011315 | 7759 PPP2R3B  |
| ENSACAG00000003646 | 7760          |
| ENSACAG00000015667 | 7761 DBP      |
| ENSACAG00000011268 | 7762 ZNF28    |
| ENSACAG00000017044 | 7763 SPG7     |
| ENSACAG00000007077 | 7764 TRIP4    |
| ENSACAG00000017994 | 7765 PLAG1    |
| ENSACAG00000003555 | 7766 LYPD6B   |
| ENSACAG00000015365 | 7767 CEP131   |
| ENSACAG00000001474 | 7768 RMI1     |

|                    |                     |
|--------------------|---------------------|
| ENSACAG00000017884 | 7769 EIF1B          |
| ENSACAG00000013631 | 7770 METTL14        |
| ENSACAG00000013732 | 7771 IMPA1          |
| ENSACAG00000002332 | 7772 TDP2           |
| ENSACAG00000012882 | 7773 MEOX2          |
| ENSACAG00000028869 | 7774 LAD1           |
| ENSACAG00000020466 | 7775 5S_rRNA        |
| ENSACAG00000002926 | 7776 PEX13          |
| ENSACAG00000009325 | 7777 PSMD5          |
| ENSACAG00000005886 | 7778 MERTK          |
| ENSACAG00000014871 | 7779                |
| ENSACAG00000011487 | 7780 L1CAM          |
| ENSACAG00000013600 | 7781                |
| ENSACAG00000008490 | 7782 TSC2           |
| ENSACAG00000014010 | 7783 SLC37A4        |
| ENSACAG00000003052 | 7784                |
| ENSACAG00000000987 | 7785                |
| ENSACAG00000010645 | 7786                |
| ENSACAG00000004276 | 7787 CHD3           |
| ENSACAG00000004437 | 7788 PARP16         |
| ENSACAG00000026079 | 7789 snoMe28S-U3344 |
| ENSACAG00000005066 | 7790 YBEY           |
| ENSACAG00000016180 | 7791 NRBP2          |
| ENSACAG00000005347 | 7792                |
| ENSACAG00000003811 | 7793                |
| ENSACAG00000007809 | 7794 KCNN2          |
| ENSACAG00000004362 | 7795 PPIF           |
| ENSACAG00000005044 | 7796 SPATA20        |
| ENSACAG00000009015 | 7797 SNX8           |
| ENSACAG00000008449 | 7798 PLA2G6         |
| ENSACAG00000001920 | 7799 SNAP25         |
| ENSACAG00000009414 | 7800 KMO            |
| ENSACAG00000013702 | 7801 IGHMBP2        |
| ENSACAG00000022598 | 7802                |
| ENSACAG00000000994 | 7803 EDRF1          |
| ENSACAG00000013699 | 7804 PRSS12         |
| ENSACAG00000001170 | 7805 RGCC           |
| ENSACAG00000004304 | 7806 SDC2           |
| ENSACAG00000009296 | 7807 MAPKAPK5       |
| ENSACAG00000002938 | 7808 SLC37A1        |
| ENSACAG00000013142 | 7809                |
| ENSACAG00000002041 | 7810 HDAC10         |

|                    |               |
|--------------------|---------------|
| ENSACAG00000016944 | 7811 JDP2     |
| ENSACAG00000016288 | 7812 CEP19    |
| ENSACAG00000009710 | 7813 ADARB1   |
| ENSACAG00000014658 | 7814 EMP2     |
| ENSACAG00000011559 | 7815 PIGN     |
| ENSACAG00000011784 | 7816 WDR24    |
| ENSACAG00000006332 | 7817 RGS19    |
| ENSACAG00000007759 | 7818 GOLGA3   |
| ENSACAG00000015356 | 7819 PYROXD1  |
| ENSACAG00000003591 | 7820 NSMCE1   |
| ENSACAG00000002855 | 7821 CTNND2   |
| ENSACAG00000001302 | 7822 CABYR    |
| ENSACAG00000009402 | 7823 ZHX2     |
| ENSACAG00000008582 | 7824 ARPC5L   |
| ENSACAG00000010301 | 7825          |
| ENSACAG00000012026 | 7826 PRKDC    |
| ENSACAG00000028571 | 7827          |
| ENSACAG00000014282 | 7828 ABCA1    |
| ENSACAG00000012708 | 7829 GDA      |
| ENSACAG00000010117 | 7830 SQLE     |
| ENSACAG00000016299 | 7831 WDR53    |
| ENSACAG00000024581 | 7832          |
| ENSACAG00000015761 | 7833 PDCD4    |
| ENSACAG00000005231 | 7834 HMGCL    |
| ENSACAG00000026181 | 7835          |
| ENSACAG00000011435 | 7836 KIAA1919 |
| ENSACAG00000004937 | 7837 EXOSC3   |
| ENSACAG00000004529 | 7838 RPAP2    |
| ENSACAG00000000041 | 7839 OVCH1    |
| ENSACAG00000006697 | 7840          |
| ENSACAG00000012261 | 7841          |
| ENSACAG00000007901 | 7842 ZDHH8    |
| ENSACAG00000003185 | 7843 ZBTB21   |
| ENSACAG00000016820 | 7844 TMEM205  |
| ENSACAG00000001143 | 7845 USP48    |
| ENSACAG00000000897 | 7846 MTRF1    |
| ENSACAG00000005388 | 7847 ZMAT4    |
| ENSACAG00000026586 | 7848 ATP6V0E2 |
| ENSACAG00000016133 | 7849 BMP7     |
| ENSACAG00000029558 | 7850 CMTM8    |
| ENSACAG00000010571 | 7851 C1orf43  |
| ENSACAG00000010798 | 7852 SCD      |

|                    |               |
|--------------------|---------------|
| ENSACAG00000004877 | 7853 SLC44A3  |
| ENSACAG00000005363 | 7854 GRINA    |
| ENSACAG00000011321 | 7855 NIT2     |
| ENSACAG00000002920 | 7856 SYT11    |
| ENSACAG00000013333 | 7857 PTPN2    |
| ENSACAG00000000004 | 7858 GTF3C5   |
| ENSACAG00000029212 | 7859          |
| ENSACAG00000011352 | 7860          |
| ENSACAG00000016532 | 7861 PMCH     |
| ENSACAG00000014726 | 7862 IFT140   |
| ENSACAG00000009040 | 7863 ZNF512   |
| ENSACAG00000004914 | 7864 LSS      |
| ENSACAG00000001702 | 7865 TPD52L1  |
| ENSACAG00000013646 | 7866 MBLAC2   |
| ENSACAG00000004497 | 7867 ARNTL    |
| ENSACAG00000001976 | 7868          |
| ENSACAG00000027639 | 7869          |
| ENSACAG00000007654 | 7870 FLRT2    |
| ENSACAG00000008122 | 7871 WARS2    |
| ENSACAG00000006213 | 7872 ESR1     |
| ENSACAG00000015374 | 7873 RANBP17  |
| ENSACAG00000029022 | 7874 LMO4     |
| ENSACAG00000007892 | 7875 HDAC6    |
| ENSACAG00000004563 | 7876 LCA5     |
| ENSACAG00000014101 | 7877 ANKRD49  |
| ENSACAG00000008702 | 7878 HYAL2    |
| ENSACAG00000001371 | 7879 NDUFAF7  |
| ENSACAG00000005606 | 7880 HK2      |
| ENSACAG00000006433 | 7881          |
| ENSACAG00000025764 | 7882 TMEM117  |
| ENSACAG00000013407 | 7883 TMEM106B |
| ENSACAG00000005315 | 7884 UBXN2B   |
| ENSACAG00000024167 | 7885          |
| ENSACAG00000016599 | 7886 RPS6KA1  |
| ENSACAG00000009550 | 7887 HECTD4   |
| ENSACAG00000009849 | 7888 GRM7     |
| ENSACAG00000012028 | 7889 LRRK1    |
| ENSACAG00000017743 | 7890          |
| ENSACAG00000011374 | 7891 NR1D2    |
| ENSACAG00000000860 | 7892 TRMT61A  |
| ENSACAG00000013994 | 7893 DHRS1    |
| ENSACAG00000005384 | 7894 PDK2     |

|                    |               |
|--------------------|---------------|
| ENSACAG00000016072 | 7895 MTG2     |
| ENSACAG00000001971 | 7896          |
| ENSACAG00000006058 | 7897 MON1B    |
| ENSACAG00000012119 | 7898          |
| ENSACAG00000005495 | 7899 RBM42    |
| ENSACAG00000011061 | 7900 UTP23    |
| ENSACAG00000013707 | 7901          |
| ENSACAG00000015618 | 7902 RGS7BP   |
| ENSACAG00000001795 | 7903 INSIG2   |
| ENSACAG00000010321 | 7904 CCDC51   |
| ENSACAG00000005851 | 7905 METTL15  |
| ENSACAG00000017353 | 7906 HSDL2    |
| ENSACAG00000011887 | 7907 TXNL4B   |
| ENSACAG00000013486 | 7908 SEPSECS  |
| ENSACAG00000024567 | 7909          |
| ENSACAG00000016439 | 7910 FNIP2    |
| ENSACAG00000005433 | 7911 C12orf57 |
| ENSACAG00000006080 | 7912          |
| ENSACAG00000028994 | 7913 KIZ      |
| ENSACAG00000007539 | 7914 COQ10A   |
| ENSACAG00000000192 | 7915 TM2D3    |
| ENSACAG00000009431 | 7916 CA2      |
| ENSACAG00000005659 | 7917          |
| ENSACAG00000012936 | 7918 GLRX     |
| ENSACAG00000001097 | 7919 DDIAS    |
| ENSACAG00000013056 | 7920 TMTC1    |
| ENSACAG00000029409 | 7921          |
| ENSACAG00000021156 | 7922 SNORA44  |
| ENSACAG00000009527 | 7923 ALMS1    |
| ENSACAG00000002337 | 7924 PRKAG2   |
| ENSACAG00000009232 | 7925 ZSWIM4   |
| ENSACAG00000002536 | 7926 LTBP3    |
| ENSACAG00000008102 | 7927 TNS3     |
| ENSACAG00000000367 | 7928 TMCO3    |
| ENSACAG00000015184 | 7929 CRY1     |
| ENSACAG00000007618 | 7930          |
| ENSACAG00000001614 | 7931 SLC27A6  |
| ENSACAG00000009407 | 7932          |
| ENSACAG00000015665 | 7933          |
| ENSACAG00000017774 | 7934 CEP85    |
| ENSACAG00000017692 | 7935 BPHL     |
| ENSACAG00000015769 | 7936 CSRP3    |

|                    |               |
|--------------------|---------------|
| ENSACAG00000011010 | 7937 PRICKLE3 |
| ENSACAG00000007787 | 7938 TPRKB    |
| ENSACAG00000017462 | 7939          |
| ENSACAG00000006381 | 7940 TMEM206  |
| ENSACAG00000017209 | 7941 TMED8    |
| ENSACAG00000003100 | 7942 FAM198A  |
| ENSACAG00000013082 | 7943 METTL21B |
| ENSACAG00000005816 | 7944 NRG3     |
| ENSACAG00000010070 | 7945          |
| ENSACAG00000012999 | 7946 PRDM5    |
| ENSACAG00000000010 | 7947 C9orf114 |
| ENSACAG00000002209 | 7948 CROCC2   |
| ENSACAG00000011168 | 7949 CERCAM   |
| ENSACAG00000012457 | 7950 NT5DC1   |
| ENSACAG00000005991 | 7951 DNAI1    |
| ENSACAG00000013909 | 7952 GTF3C3   |
| ENSACAG00000009796 | 7953 KLHDC4   |
| ENSACAG00000004969 | 7954 TBC1D17  |
| ENSACAG00000004453 | 7955 TCTN3    |
| ENSACAG00000008301 | 7956 PARP2    |
| ENSACAG00000010670 | 7957 NPRL3    |
| ENSACAG00000004915 | 7958 ATR      |
| ENSACAG00000011497 | 7959 GBA2     |
| ENSACAG00000012989 | 7960 RDM1     |
| ENSACAG00000014009 | 7961 TNXB     |
| ENSACAG00000020451 | 7962 SNORD89  |
| ENSACAG00000008612 | 7963          |
| ENSACAG00000026434 | 7964 RND1     |
| ENSACAG00000013252 | 7965 NXPH1    |
| ENSACAG00000003500 | 7966          |
| ENSACAG00000016838 | 7967 ARSB     |
| ENSACAG00000006227 | 7968 TBC1D25  |
| ENSACAG00000016064 | 7969 ILVBL    |
| ENSACAG00000005905 | 7970 PRUNE    |
| ENSACAG00000017770 | 7971 TTC39B   |
| ENSACAG00000013054 | 7972 CCDC85C  |
| ENSACAG00000013084 | 7973 LMF2     |
| ENSACAG00000029305 | 7974 FAM227B  |
| ENSACAG00000023705 | 7975 TTC31    |
| ENSACAG00000009711 | 7976 FBXO32   |
| ENSACAG00000014440 | 7977 TMEM132B |
| ENSACAG00000001127 | 7978 CDC34    |

|                    |               |
|--------------------|---------------|
| ENSACAG00000005647 | 7979 TWSG1    |
| ENSACAG00000017651 | 7980 AMPH     |
| ENSACAG00000017629 | 7981 ACER2    |
| ENSACAG00000004855 | 7982 ASAP3    |
| ENSACAG00000004387 | 7983          |
| ENSACAG00000008290 | 7984 ROR1     |
| ENSACAG00000005374 | 7985 PRDM15   |
| ENSACAG00000021949 | 7986 SNORA38  |
| ENSACAG00000000914 | 7987 THYN1    |
| ENSACAG00000009706 | 7988 GAS8     |
| ENSACAG00000025499 | 7989 FKBPL    |
| ENSACAG00000002315 | 7990 FAM89A   |
| ENSACAG00000005655 | 7991 VPS13A   |
| ENSACAG00000008574 | 7992 AUP1     |
| ENSACAG00000017715 | 7993 EXOC2    |
| ENSACAG00000020511 | 7994 SNORD88  |
| ENSACAG00000010178 | 7995          |
| ENSACAG00000006703 | 7996 AASS     |
| ENSACAG00000003055 | 7997 PUS7L    |
| ENSACAG00000022881 | 7998          |
| ENSACAG00000004250 | 7999 RCCD1    |
| ENSACAG00000001196 | 8000 NOSTRIN  |
| ENSACAG00000001238 | 8001 LRRC8C   |
| ENSACAG00000014899 | 8002 AKAP10   |
| ENSACAG00000022738 | 8003          |
| ENSACAG00000000255 | 8004 SMO      |
| ENSACAG00000000075 | 8005          |
| ENSACAG00000017275 | 8006 AGO4     |
| ENSACAG00000001772 | 8007          |
| ENSACAG00000010118 | 8008 FAM222B  |
| ENSACAG00000016337 | 8009 PCNXL3   |
| ENSACAG00000013927 | 8010          |
| ENSACAG00000008190 | 8011 VWC2     |
| ENSACAG00000013408 | 8012 PSMG2    |
| ENSACAG00000029482 | 8013          |
| ENSACAG00000017557 | 8014 AP5Z1    |
| ENSACAG00000003851 | 8015 DOCK10   |
| ENSACAG00000015563 | 8016 MPHOSPH9 |
| ENSACAG00000012117 | 8017 NDST4    |
| ENSACAG00000005428 | 8018          |
| ENSACAG00000010073 | 8019 CASP7    |
| ENSACAG00000009445 | 8020 TP53INP2 |

|                    |               |
|--------------------|---------------|
| ENSACAG00000005626 | 8021 NSUN6    |
| ENSACAG00000012892 | 8022          |
| ENSACAG00000012946 | 8023          |
| ENSACAG00000008075 | 8024 PANK1    |
| ENSACAG00000005875 | 8025 ATP11C   |
| ENSACAG00000003583 | 8026 GOT1     |
| ENSACAG00000006351 | 8027          |
| ENSACAG00000009893 | 8028          |
| ENSACAG00000009177 | 8029 KLF10    |
| ENSACAG00000012720 | 8030 PPEF2    |
| ENSACAG00000012380 | 8031 CREBBP   |
| ENSACAG00000005393 | 8032 ECE1     |
| ENSACAG00000008819 | 8033 RBMX2    |
| ENSACAG00000003178 | 8034          |
| ENSACAG00000011298 | 8035 VPS45    |
| ENSACAG00000013545 | 8036 RUNDC1   |
| ENSACAG00000016841 | 8037 TBXAS1   |
| ENSACAG00000014293 | 8038 POLR3F   |
| ENSACAG00000016881 | 8039 HEXDC    |
| ENSACAG00000003672 | 8040 TNNI1    |
| ENSACAG00000011536 | 8041 GRAMD2   |
| ENSACAG00000010538 | 8042          |
| ENSACAG00000025338 | 8043          |
| ENSACAG00000006717 | 8044 FHOD3    |
| ENSACAG00000016138 | 8045 TRRAP    |
| ENSACAG00000025943 | 8046 CCDC61   |
| ENSACAG00000003894 | 8047          |
| ENSACAG00000008455 | 8048          |
| ENSACAG00000006681 | 8049 WDR59    |
| ENSACAG00000005892 | 8050 PIGK     |
| ENSACAG00000014979 | 8051 RAPGEF3  |
| ENSACAG00000003783 | 8052 C10orf2  |
| ENSACAG00000000451 | 8053 HNMT     |
| ENSACAG00000001161 | 8054 TOR1AIP2 |
| ENSACAG00000008257 | 8055 MAPRE3   |
| ENSACAG00000004894 | 8056 MFSD2A   |
| ENSACAG00000029208 | 8057          |
| ENSACAG00000015102 | 8058 DEAF1    |
| ENSACAG00000004533 | 8059          |
| ENSACAG00000006239 | 8060 ROGDI    |
| ENSACAG00000005214 | 8061 SNAP47   |
| ENSACAG00000008195 | 8062 RBCK1    |



|                     |               |
|---------------------|---------------|
| ENSACAG00000004471  | 8063 PARP8    |
| ENSACAG00000004569  | 8064          |
| ENSACAG00000001807  | 8065 KNOP1    |
| ENSACAG000000016967 | 8066 LYRM5    |
| ENSACAG000000010027 | 8067 GPAM     |
| ENSACAG00000005838  | 8068 P3H3     |
| ENSACAG000000017332 | 8069          |
| ENSACAG000000011226 | 8070 C2orf69  |
| ENSACAG00000004721  | 8071 NBEAL1   |
| ENSACAG000000007621 | 8072          |
| ENSACAG000000016630 | 8073 ADHFE1   |
| ENSACAG000000007003 | 8074 DNM1     |
| ENSACAG000000009703 | 8075 ITGA9    |
| ENSACAG000000006663 | 8076 ST3GAL5  |
| ENSACAG000000028511 | 8077 MAT2B    |
| ENSACAG000000007689 | 8078 RBM15B   |
| ENSACAG000000005329 | 8079 TSHZ1    |
| ENSACAG00000004003  | 8080          |
| ENSACAG000000001694 | 8081 RNF217   |
| ENSACAG000000017706 | 8082 ZBTB44   |
| ENSACAG000000012349 | 8083          |
| ENSACAG000000008606 | 8084 PPA2     |
| ENSACAG000000029616 | 8085 FAM19A5  |
| ENSACAG000000017341 | 8086 FAM46A   |
| ENSACAG000000009103 | 8087 TBCCD1   |
| ENSACAG000000006575 | 8088 SLA2     |
| ENSACAG000000016213 | 8089 NCF4     |
| ENSACAG000000008370 | 8090 LDB2     |
| ENSACAG000000000766 | 8091          |
| ENSACAG000000003603 | 8092          |
| ENSACAG000000002566 | 8093          |
| ENSACAG000000016487 | 8094          |
| ENSACAG000000014844 | 8095 DLG3     |
| ENSACAG000000002100 | 8096 C4orf47  |
| ENSACAG000000016096 | 8097 SYDE1    |
| ENSACAG000000010805 | 8098          |
| ENSACAG000000028438 | 8099 TMEM235  |
| ENSACAG000000005160 | 8100          |
| ENSACAG000000006481 | 8101          |
| ENSACAG000000015541 | 8102 ARHGEF11 |
| ENSACAG000000016191 | 8103 SNAPC1   |
| ENSACAG000000026879 | 8104          |

|                    |               |
|--------------------|---------------|
| ENSACAG00000013059 | 8105 JPH1     |
| ENSACAG00000012386 | 8106 DALRD3   |
| ENSACAG00000029507 | 8107 MTCH1    |
| ENSACAG00000013966 | 8108 STPG2    |
| ENSACAG00000015654 | 8109 BEST4    |
| ENSACAG00000007279 | 8110 MFSD9    |
| ENSACAG00000014956 | 8111          |
| ENSACAG00000008844 | 8112 AMPD3    |
| ENSACAG00000009806 | 8113 AHI1     |
| ENSACAG00000028799 | 8114 C1orf52  |
| ENSACAG00000004172 | 8115 DTWD2    |
| ENSACAG00000017129 | 8116 PRR11    |
| ENSACAG00000028388 | 8117 UBE2T    |
| ENSACAG00000010139 | 8118 HEG1     |
| ENSACAG00000005707 | 8119 C14orf80 |
| ENSACAG00000026848 | 8120          |
| ENSACAG00000017319 | 8121 MAPT     |
| ENSACAG00000012250 | 8122 VWA3B    |
| ENSACAG00000019457 | 8123 5S_rRNA  |
| ENSACAG00000001342 | 8124 TMEM175  |
| ENSACAG00000003121 | 8125 OTUD7A   |
| ENSACAG00000008047 | 8126 INPP1    |
| ENSACAG00000001262 | 8127 FAM171B  |
| ENSACAG00000007047 | 8128 ING3     |
| ENSACAG00000009786 | 8129 ASB7     |
| ENSACAG00000009951 | 8130 ETNK2    |
| ENSACAG00000026969 | 8131          |
| ENSACAG00000017198 | 8132 GSTZ1    |
| ENSACAG00000000837 | 8133 KATNB1   |
| ENSACAG00000007545 | 8134 TONSL    |
| ENSACAG00000004314 | 8135          |
| ENSACAG00000001360 | 8136 CDC16    |
| ENSACAG00000017625 | 8137 SLC24A2  |
| ENSACAG00000016577 | 8138 MYBL1    |
| ENSACAG00000001543 | 8139 THAP5    |
| ENSACAG00000003560 | 8140          |
| ENSACAG00000008970 | 8141 CHTF18   |
| ENSACAG00000010038 | 8142 ADCY2    |
| ENSACAG00000004458 | 8143 SERTM1   |
| ENSACAG00000008064 | 8144 PGPEP1L  |
| ENSACAG00000003328 | 8145 MTIF2    |
| ENSACAG00000013561 | 8146 ZCCHC4   |

|                    |              |
|--------------------|--------------|
| ENSACAG00000001937 | 8147 FAM65B  |
| ENSACAG00000028539 | 8148         |
| ENSACAG00000008111 | 8149 CHST10  |
| ENSACAG00000006950 | 8150 NPRL2   |
| ENSACAG00000018192 | 8151 5S_rRNA |
| ENSACAG00000015594 | 8152 CHRNB2  |
| ENSACAG00000011385 | 8153 CRYZ    |
| ENSACAG00000015687 | 8154 OGFOD2  |
| ENSACAG00000017123 | 8155 NOL9    |
| ENSACAG00000000079 | 8156 NR2F2   |
| ENSACAG00000018879 | 8157 ACA64   |
| ENSACAG00000006944 | 8158 METTL22 |
| ENSACAG00000008150 | 8159 AJAP1   |
| ENSACAG00000016262 | 8160 IFT27   |
| ENSACAG00000028294 | 8161         |
| ENSACAG00000015548 | 8162 ALKBH7  |
| ENSACAG00000000822 | 8163 CCSAP   |
| ENSACAG00000014393 | 8164         |
| ENSACAG00000029313 | 8165 CDPF1   |
| ENSACAG00000000415 | 8166 PNPLA4  |
| ENSACAG00000004008 | 8167 TBC1D2  |
| ENSACAG00000015261 | 8168 NEURL1B |
| ENSACAG00000008688 | 8169 RCC2    |
| ENSACAG00000008998 | 8170         |
| ENSACAG00000012217 | 8171 CECR5   |
| ENSACAG00000016186 | 8172 METAP1D |
| ENSACAG00000000011 | 8173 TBC1D13 |
| ENSACAG00000005497 | 8174 SAP30   |
| ENSACAG00000012345 | 8175         |
| ENSACAG00000000524 | 8176 NAGK    |
| ENSACAG00000004438 | 8177 GART    |
| ENSACAG00000007817 | 8178 MAP3K13 |
| ENSACAG00000029672 | 8179         |
| ENSACAG00000021013 | 8180         |
| ENSACAG00000025574 | 8181         |
| ENSACAG00000017335 | 8182 PIH1D1  |
| ENSACAG00000009921 | 8183 ERBB4   |
| ENSACAG00000012429 | 8184         |
| ENSACAG00000009377 | 8185         |
| ENSACAG00000015281 | 8186         |
| ENSACAG00000001884 | 8187 BUD13   |
| ENSACAG00000004790 | 8188 BSDC1   |

|                    |                 |
|--------------------|-----------------|
| ENSACAG00000016382 | 8189 TXN2       |
| ENSACAG00000003267 | 8190 FGF14      |
| ENSACAG00000011216 | 8191 GNAT2      |
| ENSACAG00000002806 | 8192 METTL6     |
| ENSACAG00000006225 | 8193 DDX59      |
| ENSACAG00000001031 | 8194 ZC3H12C    |
| ENSACAG00000017005 | 8195 DENND1A    |
| ENSACAG00000016698 | 8196 TP53RK     |
| ENSACAG00000015793 | 8197 GAA        |
| ENSACAG00000000883 | 8198 NECAB2     |
| ENSACAG00000009223 | 8199            |
| ENSACAG00000002150 | 8200 NSUN4      |
| ENSACAG00000011454 | 8201 EDIL3      |
| ENSACAG00000013432 | 8202 CFAP54     |
| ENSACAG00000001078 | 8203 CTDNEP1    |
| ENSACAG00000005034 | 8204 TCEA3      |
| ENSACAG00000007476 | 8205 DCAKD      |
| ENSACAG00000008435 | 8206 ADCY6      |
| ENSACAG00000026502 | 8207 HIST2H2AA3 |
| ENSACAG00000002988 | 8208 IRAK4      |
| ENSACAG00000012682 | 8209 RIC3       |
| ENSACAG00000009542 | 8210 TNNI2      |
| ENSACAG00000007379 | 8211 HOMEZ      |
| ENSACAG00000011282 | 8212 BCL7B      |
| ENSACAG00000010143 | 8213 C4orf22    |
| ENSACAG00000003344 | 8214 WDTC1      |
| ENSACAG00000005763 | 8215 BEND3      |
| ENSACAG00000010029 | 8216 GRIK2      |
| ENSACAG00000008979 | 8217 CAMK1D     |
| ENSACAG00000001446 | 8218            |
| ENSACAG00000024335 | 8219            |
| ENSACAG00000013632 | 8220 PTPRT      |
| ENSACAG00000009790 | 8221            |
| ENSACAG00000014865 | 8222 ARAP1      |
| ENSACAG00000001523 | 8223 PGBD5      |
| ENSACAG00000010659 | 8224            |
| ENSACAG00000003474 | 8225            |
| ENSACAG00000014965 | 8226            |
| ENSACAG00000008046 | 8227 BNIP3      |
| ENSACAG00000008728 | 8228            |
| ENSACAG00000016744 | 8229 OSER1      |
| ENSACAG00000003234 | 8230 THAP9      |

|                     |               |
|---------------------|---------------|
| ENSACAG00000002925  | 8231 PPP1R3B  |
| ENSACAG00000001704  | 8232 SLC7A11  |
| ENSACAG00000003695  | 8233          |
| ENSACAG000000017062 | 8234          |
| ENSACAG00000005283  | 8235 TDRP     |
| ENSACAG00000008194  | 8236 CYP2U1   |
| ENSACAG000000014802 | 8237 XKR9     |
| ENSACAG000000010305 | 8238 POLE     |
| ENSACAG00000006425  | 8239 PSMB8    |
| ENSACAG000000015791 | 8240 FMN2     |
| ENSACAG00000002643  | 8241 AKAP6    |
| ENSACAG00000008405  | 8242 RCE1     |
| ENSACAG00000005454  | 8243 MRPS23   |
| ENSACAG00000009183  | 8244 SLC25A33 |
| ENSACAG000000010050 | 8245 ANGPT1   |
| ENSACAG000000017416 | 8246 STXBP4   |
| ENSACAG000000011528 | 8247 TMEM45A  |
| ENSACAG000000016486 | 8248          |
| ENSACAG00000007436  | 8249 HERPUD2  |
| ENSACAG00000001919  | 8250 MAPK12   |
| ENSACAG000000015978 | 8251 FHDC1    |
| ENSACAG00000008803  | 8252 CIDEA    |
| ENSACAG000000014133 | 8253 PSD      |
| ENSACAG00000000840  | 8254 NEMP2    |
| ENSACAG000000016890 | 8255 BRPF3    |
| ENSACAG00000007804  | 8256 PTPRS    |
| ENSACAG000000011631 | 8257 REXO2    |
| ENSACAG000000004719 | 8258 HACD3    |
| ENSACAG000000012851 | 8259          |
| ENSACAG000000015957 | 8260 CCDC40   |
| ENSACAG000000008711 | 8261 LOXL3    |
| ENSACAG00000001888  | 8262 AAMDC    |
| ENSACAG000000010788 | 8263 UNC80    |
| ENSACAG000000026371 | 8264 FIGNL1   |
| ENSACAG00000002776  | 8265 UBTD1    |
| ENSACAG000000016026 | 8266 CWF19L1  |
| ENSACAG000000013005 | 8267 GORAB    |
| ENSACAG00000006011  | 8268 LACE1    |
| ENSACAG000000012567 | 8269 DOPEY2   |
| ENSACAG000000002461 | 8270 IFT52    |
| ENSACAG000000008715 | 8271 DLC1     |
| ENSACAG00000004483  | 8272          |

|                    |              |
|--------------------|--------------|
| ENSACAG00000003346 | 8273 YWHAG   |
| ENSACAG00000013871 | 8274 GLCE    |
| ENSACAG00000003825 | 8275 TRMT1   |
| ENSACAG00000003143 | 8276 SLC23A3 |
| ENSACAG00000007444 | 8277 YPEL5   |
| ENSACAG00000015760 | 8278 SLC26A2 |
| ENSACAG00000013481 | 8279 FAM221A |
| ENSACAG00000001240 | 8280 STK40   |
| ENSACAG00000010749 | 8281 PRDM2   |
| ENSACAG00000015041 | 8282 FAM102A |
| ENSACAG00000009533 | 8283 LLGL1   |
| ENSACAG00000013317 | 8284 PIK3CD  |
| ENSACAG00000023038 | 8285 IRX1    |
| ENSACAG00000004290 | 8286 MAN2A2  |
| ENSACAG00000003578 | 8287 CDC37L1 |
| ENSACAG00000009000 | 8288 DEPDC1B |
| ENSACAG00000006390 | 8289 PAAF1   |
| ENSACAG00000001564 | 8290 DNAJB9  |
| ENSACAG00000007655 | 8291 CHFR    |
| ENSACAG00000000602 | 8292         |
| ENSACAG00000002997 | 8293 AGPAT4  |
| ENSACAG00000016635 | 8294         |
| ENSACAG00000003984 | 8295 B4GALT3 |
| ENSACAG00000008662 | 8296 ICK     |
| ENSACAG00000002721 | 8297 SLC16A2 |
| ENSACAG00000005137 | 8298 ACAA1   |
| ENSACAG00000011475 | 8299         |
| ENSACAG00000009074 | 8300 PRPF40B |
| ENSACAG00000009809 | 8301 LINS1   |
| ENSACAG00000011857 | 8302 TNRC6A  |
| ENSACAG00000005870 | 8303         |
| ENSACAG00000001296 | 8304 TMEM237 |
| ENSACAG00000029331 | 8305 UBF1    |
| ENSACAG00000001711 | 8306 FBN2    |
| ENSACAG00000023488 | 8307         |
| ENSACAG00000001195 | 8308 UCMA    |
| ENSACAG00000026010 | 8309         |
| ENSACAG00000002696 | 8310 TTC21B  |
| ENSACAG00000005930 | 8311         |
| ENSACAG00000006176 | 8312 MTHFD2  |
| ENSACAG00000014731 | 8313 TMTC2   |
| ENSACAG00000010730 | 8314         |

|                    |               |
|--------------------|---------------|
| ENSACAG00000005368 | 8315 SUOX     |
| ENSACAG00000017546 | 8316 C7orf25  |
| ENSACAG00000013624 | 8317 GDPD1    |
| ENSACAG00000005979 | 8318 HEATR6   |
| ENSACAG00000010242 | 8319 SLC35A5  |
| ENSACAG00000011666 | 8320 FCHSD1   |
| ENSACAG00000002030 | 8321 ENOX1    |
| ENSACAG00000005775 | 8322 FAM188B  |
| ENSACAG00000019078 | 8323 5S_rRNA  |
| ENSACAG00000006089 | 8324 ZBTB48   |
| ENSACAG00000004862 | 8325 TXLNB    |
| ENSACAG00000005063 | 8326 PLXNA3   |
| ENSACAG00000007508 | 8327 WDR19    |
| ENSACAG00000028324 | 8328          |
| ENSACAG00000014730 | 8329 TIMP3    |
| ENSACAG00000007108 | 8330 ZNF646   |
| ENSACAG00000013108 | 8331          |
| ENSACAG00000010624 | 8332 FANCB    |
| ENSACAG00000012154 | 8333          |
| ENSACAG00000013974 | 8334 IVD      |
| ENSACAG00000022013 | 8335          |
| ENSACAG00000013582 | 8336 ZC3H12B  |
| ENSACAG00000014842 | 8337 PLEKHF1  |
| ENSACAG00000006655 | 8338 RMND5B   |
| ENSACAG00000011850 | 8339 POLL     |
| ENSACAG00000003086 | 8340 PRICKLE1 |
| ENSACAG00000015049 | 8341          |
| ENSACAG00000001927 | 8342 LCMT1    |
| ENSACAG00000011266 | 8343 ATP8B2   |
| ENSACAG00000008071 | 8344 VPS9D1   |
| ENSACAG00000024120 | 8345 N4BP2L2  |
| ENSACAG00000012772 | 8346          |
| ENSACAG00000001274 | 8347 MYL5     |
| ENSACAG00000000858 | 8348 TGFBI    |
| ENSACAG00000014517 | 8349 CGNL1    |
| ENSACAG00000003475 | 8350 MRI1     |
| ENSACAG00000016153 | 8351 TNIK     |
| ENSACAG00000010778 | 8352          |
| ENSACAG00000023772 | 8353          |
| ENSACAG00000004337 | 8354 PHACTR1  |
| ENSACAG00000014576 | 8355          |
| ENSACAG00000000303 | 8356          |

|                    |                |
|--------------------|----------------|
| ENSACAG00000014501 | 8357 WIPI2     |
| ENSACAG00000011254 | 8358 ARNT      |
| ENSACAG00000016884 | 8359 SWSAP1    |
| ENSACAG00000000490 | 8360 PRKAR1B   |
| ENSACAG00000009279 | 8361 SCPEP1    |
| ENSACAG00000001492 | 8362 CYP4V2    |
| ENSACAG00000027527 | 8363           |
| ENSACAG00000003037 | 8364 PLD3      |
| ENSACAG00000009814 | 8365 C14orf159 |
| ENSACAG00000008707 | 8366           |
| ENSACAG00000005634 | 8367 ARL5B     |
| ENSACAG00000009537 | 8368 PDE1C     |
| ENSACAG00000027252 | 8369           |
| ENSACAG00000002390 | 8370 TBRG4     |
| ENSACAG00000012746 | 8371 TMCC3     |
| ENSACAG00000026940 | 8372           |
| ENSACAG00000000991 | 8373 KIAA0355  |
| ENSACAG00000016010 | 8374           |
| ENSACAG00000005328 | 8375 NMRK1     |
| ENSACAG00000006124 | 8376 PRR7      |
| ENSACAG00000015368 | 8377           |
| ENSACAG00000005982 | 8378 GINS3     |
| ENSACAG00000001053 | 8379 MRPL40    |
| ENSACAG00000004830 | 8380 TMEM248   |
| ENSACAG00000014551 | 8381           |
| ENSACAG00000006952 | 8382           |
| ENSACAG00000010201 | 8383 FASTKD3   |
| ENSACAG00000015764 | 8384 HTR4      |
| ENSACAG00000004992 | 8385 FAM117A   |
| ENSACAG00000004335 | 8386 CPM       |
| ENSACAG00000024638 | 8387           |
| ENSACAG00000013728 | 8388 CRTAP     |
| ENSACAG00000009730 | 8389 SUPT7L    |
| ENSACAG00000011669 | 8390 CCDC189   |
| ENSACAG00000006666 | 8391 BCL6      |
| ENSACAG00000018831 | 8392 5S_rRNA   |
| ENSACAG00000014838 | 8393 VPS72     |
| ENSACAG00000005296 | 8394           |
| ENSACAG00000007904 | 8395 TMEM41A   |
| ENSACAG00000014160 | 8396 DNAJB5    |
| ENSACAG00000011244 | 8397           |
| ENSACAG00000008708 | 8398 MAK       |



|                    |              |
|--------------------|--------------|
| ENSACAG00000023870 | 8399 FXR2    |
| ENSACAG00000010835 | 8400 PSMG4   |
| ENSACAG00000005108 | 8401 TRAF6   |
| ENSACAG00000006553 | 8402         |
| ENSACAG00000007570 | 8403 KIFC3   |
| ENSACAG00000017435 | 8404 MRPL50  |
| ENSACAG00000002266 | 8405 FUK     |
| ENSACAG00000013746 | 8406 TMEM82  |
| ENSACAG00000023388 | 8407         |
| ENSACAG00000009394 | 8408 JAG2    |
| ENSACAG00000004762 | 8409 SSUH2   |
| ENSACAG00000000507 | 8410         |
| ENSACAG00000006268 | 8411 SLC35F2 |
| ENSACAG00000024792 | 8412 CA3     |
| ENSACAG00000017901 | 8413         |
| ENSACAG00000000549 | 8414 DENND3  |
| ENSACAG00000015231 | 8415 EOGT    |
| ENSACAG00000006973 | 8416 ING2    |
| ENSACAG00000029355 | 8417 CNIH3   |
| ENSACAG00000020440 | 8418         |
| ENSACAG00000011874 | 8419 PLCXD1  |
| ENSACAG00000017458 | 8420 TMEM246 |
| ENSACAG00000016254 | 8421 FBXO34  |
| ENSACAG00000011645 | 8422 C2orf44 |
| ENSACAG00000016776 | 8423 UBAC2   |
| ENSACAG00000009097 | 8424 RECK    |
| ENSACAG00000016736 | 8425 HOMER1  |
| ENSACAG00000002299 | 8426 ARV1    |
| ENSACAG00000015395 | 8427 USP3    |
| ENSACAG00000007726 | 8428         |
| ENSACAG00000005705 | 8429 THAP1   |
| ENSACAG00000011895 | 8430 THAP7   |
| ENSACAG00000009811 | 8431 GPR68   |
| ENSACAG00000001176 | 8432 SART3   |
| ENSACAG00000003489 | 8433         |
| ENSACAG00000009765 | 8434 TCN2    |
| ENSACAG00000004490 | 8435 KDM6B   |
| ENSACAG00000027722 | 8436         |
| ENSACAG00000017551 | 8437         |
| ENSACAG00000025824 | 8438 CNNM3   |
| ENSACAG00000014548 | 8439 TTC32   |
| ENSACAG00000010533 | 8440 MSH3    |

|                    |               |
|--------------------|---------------|
| ENSACAG00000004089 | 8441 DMWD     |
| ENSACAG00000010220 | 8442          |
| ENSACAG00000018721 | 8443 SNORD88  |
| ENSACAG00000007851 | 8444          |
| ENSACAG00000002759 | 8445 3-Mar    |
| ENSACAG00000013139 | 8446 EIF2AK1  |
| ENSACAG00000007396 | 8447 TMEM19   |
| ENSACAG00000007170 | 8448          |
| ENSACAG00000001761 | 8449 PI4KA    |
| ENSACAG00000000517 | 8450 CMC4     |
| ENSACAG00000009221 | 8451 CHN1     |
| ENSACAG00000016102 | 8452 HEATR4   |
| ENSACAG00000012970 | 8453 HERC3    |
| ENSACAG00000003338 | 8454 RNASEH2A |
| ENSACAG00000014631 | 8455 TNRC18   |
| ENSACAG00000001804 | 8456 STAMBP   |
| ENSACAG00000017448 | 8457 C10orf88 |
| ENSACAG00000004821 | 8458 EAF2     |
| ENSACAG00000015360 | 8459 EFCAB1   |
| ENSACAG00000015733 | 8460 IPP      |
| ENSACAG00000008214 | 8461 QRICH2   |
| ENSACAG00000004078 | 8462 SNX33    |
| ENSACAG00000014833 | 8463 C21orf91 |
| ENSACAG00000013549 | 8464 FABP5    |
| ENSACAG00000013976 | 8465 ACOT8    |
| ENSACAG00000012072 | 8466 PTPN13   |
| ENSACAG00000001107 | 8467 RGS3     |
| ENSACAG00000009191 | 8468 DZIP1L   |
| ENSACAG00000003468 | 8469 RGS7     |
| ENSACAG00000007334 | 8470 MGLL     |
| ENSACAG00000025163 | 8471          |
| ENSACAG00000015410 | 8472 ZBTB37   |
| ENSACAG00000015019 | 8473 CRMP1    |
| ENSACAG00000017492 | 8474 HECW1    |
| ENSACAG00000003595 | 8475 GRIP1    |
| ENSACAG00000010422 | 8476 FHL2     |
| ENSACAG00000007925 | 8477 KIF21A   |
| ENSACAG00000010589 | 8478 RECQL4   |
| ENSACAG00000015066 | 8479 SLC2A6   |
| ENSACAG00000003518 | 8480 SNX15    |
| ENSACAG00000027473 | 8481          |
| ENSACAG00000023018 | 8482          |

|                    |              |
|--------------------|--------------|
| ENSACAG00000004400 | 8483 SLC5A6  |
| ENSACAG00000011227 | 8484 MYLK2   |
| ENSACAG00000000364 | 8485 FBXO41  |
| ENSACAG00000007836 | 8486 PLCL2   |
| ENSACAG00000017085 | 8487 MYOT    |
| ENSACAG00000024523 | 8488         |
| ENSACAG00000016203 | 8489 SDHB    |
| ENSACAG00000014625 | 8490 EFCAB10 |
| ENSACAG00000000859 | 8491 TSR1    |
| ENSACAG00000010198 | 8492 MMP16   |
| ENSACAG00000003318 | 8493 EPHA7   |
| ENSACAG00000002635 | 8494 MCEE    |
| ENSACAG00000006948 | 8495 CIZ1    |
| ENSACAG00000010866 | 8496 KCTD9   |
| ENSACAG00000013625 | 8497 GPNMB   |
| ENSACAG00000003496 | 8498 ERBB2   |
| ENSACAG00000028109 | 8499         |
| ENSACAG00000027238 | 8500 NDE1    |
| ENSACAG00000023067 | 8501         |
| ENSACAG00000008542 | 8502 ATP7A   |
| ENSACAG00000008941 | 8503         |
| ENSACAG00000001340 | 8504 MUL1    |
| ENSACAG00000006601 | 8505 CCDC58  |
| ENSACAG00000026629 | 8506 CHST14  |
| ENSACAG00000015522 | 8507 ETV3    |
| ENSACAG00000003471 | 8508 TMEM9   |
| ENSACAG00000007165 | 8509 CRYM    |
| ENSACAG00000006393 | 8510 ITPKB   |
| ENSACAG00000009190 | 8511 FAM58A  |
| ENSACAG00000011958 | 8512 DHRS12  |
| ENSACAG00000000076 | 8513         |
| ENSACAG00000000786 | 8514 UQCR10  |
| ENSACAG00000002321 | 8515 IFT88   |
| ENSACAG00000013802 | 8516 DACH2   |
| ENSACAG00000011815 | 8517 TUBE1   |
| ENSACAG00000007940 | 8518 C5orf22 |
| ENSACAG00000029150 | 8519         |
| ENSACAG00000014049 | 8520         |
| ENSACAG00000011162 | 8521 SETD1B  |
| ENSACAG00000006419 | 8522 TRPV2   |
| ENSACAG00000011746 | 8523 SKIV2L  |
| ENSACAG00000023158 | 8524         |

|                    |               |
|--------------------|---------------|
| ENSACAG00000015718 | 8525 PHF21B   |
| ENSACAG00000017451 | 8526 ADPRM    |
| ENSACAG00000016636 | 8527 MTX3     |
| ENSACAG00000017035 | 8528 PDE7B    |
| ENSACAG00000028403 | 8529 TSPO2    |
| ENSACAG00000016431 | 8530 SNX31    |
| ENSACAG00000004333 | 8531          |
| ENSACAG00000016077 | 8532          |
| ENSACAG00000000320 | 8533          |
| ENSACAG00000010612 | 8534 FBXO4    |
| ENSACAG00000009528 | 8535 ABCC10   |
| ENSACAG00000016386 | 8536          |
| ENSACAG00000025988 | 8537 MMP27    |
| ENSACAG00000005485 | 8538 CEP78    |
| ENSACAG00000001464 | 8539 TSNAXIP1 |
| ENSACAG00000004099 | 8540 USP21    |
| ENSACAG00000001938 | 8541 AMZ2     |
| ENSACAG00000017200 | 8542 CDK10    |
| ENSACAG00000010208 | 8543 ARFIP2   |
| ENSACAG00000015071 | 8544 GPRC5C   |
| ENSACAG00000009077 | 8545 SDR39U1  |
| ENSACAG00000000940 | 8546 SDC3     |
| ENSACAG00000027098 | 8547          |
| ENSACAG00000017210 | 8548 SAMD15   |
| ENSACAG00000025568 | 8549          |
| ENSACAG00000005392 | 8550 GAMT     |
| ENSACAG00000022492 | 8551 TIAM1    |
| ENSACAG00000015023 | 8552 HBP1     |
| ENSACAG00000017476 | 8553 ATHL1    |
| ENSACAG00000007481 | 8554 NEK4     |
| ENSACAG00000002286 | 8555          |
| ENSACAG00000005737 | 8556          |
| ENSACAG00000005799 | 8557          |
| ENSACAG00000009200 | 8558 PLCG2    |
| ENSACAG00000012629 | 8559 CRADD    |
| ENSACAG00000010484 | 8560          |
| ENSACAG00000004321 | 8561 ETHE1    |
| ENSACAG00000013301 | 8562 COL1A2   |
| ENSACAG00000001733 | 8563 NCKIPSD  |
| ENSACAG00000014940 | 8564 MRPL39   |
| ENSACAG00000006002 | 8565 LRP3     |
| ENSACAG00000012143 | 8566 CORO6    |

|                    |               |
|--------------------|---------------|
| ENSACAG00000028568 | 8567 C10orf11 |
| ENSACAG00000014166 | 8568 TMEM260  |
| ENSACAG00000009251 | 8569          |
| ENSACAG00000012762 | 8570 AAED1    |
| ENSACAG00000027514 | 8571 MTMR11   |
| ENSACAG00000007800 | 8572 CPNE8    |
| ENSACAG00000003867 | 8573          |
| ENSACAG00000013477 | 8574 SZT2     |
| ENSACAG00000004514 | 8575 MTFMT    |
| ENSACAG00000026199 | 8576 TMEM158  |
| ENSACAG00000003936 | 8577 FAM109B  |
| ENSACAG00000010392 | 8578          |
| ENSACAG00000007021 | 8579 CSAD     |
| ENSACAG00000015861 | 8580 TUBGCP2  |
| ENSACAG00000010052 | 8581 IQCH     |
| ENSACAG00000008949 | 8582          |
| ENSACAG00000025675 | 8583          |
| ENSACAG00000001994 | 8584 ANAPC2   |
| ENSACAG00000010451 | 8585          |
| ENSACAG00000004784 | 8586 IRAK1BP1 |
| ENSACAG00000002125 | 8587 KIF6     |
| ENSACAG00000005986 | 8588 SLC23A2  |
| ENSACAG00000021420 | 8589 7SK      |
| ENSACAG00000016169 | 8590 ENGASE   |
| ENSACAG00000027626 | 8591          |
| ENSACAG00000010562 | 8592 TPM4     |
| ENSACAG00000023822 | 8593 ASXL2    |
| ENSACAG00000016919 | 8594 ZNF385C  |
| ENSACAG00000017837 | 8595          |
| ENSACAG00000006947 | 8596          |
| ENSACAG00000009761 | 8597          |
| ENSACAG00000012624 | 8598 FGD4     |
| ENSACAG00000011407 | 8599          |
| ENSACAG00000011433 | 8600 MESDC1   |
| ENSACAG00000019502 | 8601          |
| ENSACAG00000001644 | 8602 CCP110   |
| ENSACAG00000002059 | 8603 SGTA     |
| ENSACAG00000004043 | 8604 PPFIBP2  |
| ENSACAG00000006136 | 8605 LMF1     |
| ENSACAG00000009062 | 8606 ALG2     |
| ENSACAG00000016950 | 8607 CDH15    |
| ENSACAG00000006611 | 8608 TES      |

|                    |               |
|--------------------|---------------|
| ENSACAG00000010248 | 8609 DNAJC27  |
| ENSACAG00000006134 | 8610 GEMIN6   |
| ENSACAG00000013074 | 8611 SCAI     |
| ENSACAG00000007095 | 8612 WDR35    |
| ENSACAG00000011220 | 8613 SLC35F6  |
| ENSACAG00000014183 | 8614 PPP1R16B |
| ENSACAG00000001597 | 8615 GDE1     |
| ENSACAG00000016692 | 8616 GPN2     |
| ENSACAG00000018510 | 8617 SNORA32  |
| ENSACAG00000004565 | 8618          |
| ENSACAG00000009789 | 8619 PECR     |
| ENSACAG00000001537 | 8620 SMPDL3A  |
| ENSACAG00000015955 | 8621 CDKN2D   |
| ENSACAG00000026399 | 8622          |
| ENSACAG00000014772 | 8623 EFCAB11  |
| ENSACAG00000015444 | 8624 ISG20L2  |
| ENSACAG00000015221 | 8625          |
| ENSACAG00000017633 | 8626          |
| ENSACAG00000013487 | 8627 DGAT1    |
| ENSACAG00000008058 | 8628 CLCF1    |
| ENSACAG00000003879 | 8629 ARL5C    |
| ENSACAG00000009209 | 8630 GUSB     |
| ENSACAG00000003005 | 8631          |
| ENSACAG00000014349 | 8632 UACA     |
| ENSACAG00000012775 | 8633 NAAA     |
| ENSACAG00000012472 | 8634 TMEM187  |
| ENSACAG00000004570 | 8635 G6PC3    |
| ENSACAG00000004468 | 8636 TMEM108  |
| ENSACAG00000018608 | 8637 5S_rRNA  |
| ENSACAG00000013614 | 8638 DDI2     |
| ENSACAG00000015903 | 8639 RORA     |
| ENSACAG00000009144 | 8640 ADAM9    |
| ENSACAG00000009656 | 8641 AAK1     |
| ENSACAG00000000109 | 8642 FAM118B  |
| ENSACAG00000002688 | 8643          |
| ENSACAG00000011788 | 8644 LACTB    |
| ENSACAG00000027479 | 8645 PDLIM4   |
| ENSACAG00000008613 | 8646 LARP6    |
| ENSACAG00000005602 | 8647          |
| ENSACAG00000009729 | 8648 TRAF3IP1 |
| ENSACAG00000003992 | 8649 CCDC85A  |
| ENSACAG00000004427 | 8650 C1orf101 |

|                    |               |
|--------------------|---------------|
| ENSACAG00000012481 | 8651 TPGS2    |
| ENSACAG00000025636 | 8652          |
| ENSACAG00000029652 | 8653 PIGX     |
| ENSACAG00000005352 | 8654 FAM110C  |
| ENSACAG00000013604 | 8655 ANAPC4   |
| ENSACAG00000029473 | 8656 C1orf159 |
| ENSACAG00000017307 | 8657 DOPEY1   |
| ENSACAG00000014733 | 8658 MBD4     |
| ENSACAG00000028374 | 8659 SLC25A29 |
| ENSACAG00000006832 | 8660 RARG     |
| ENSACAG00000009305 | 8661 ARHGEF28 |
| ENSACAG00000014647 | 8662 HDAC8    |
| ENSACAG00000012833 | 8663          |
| ENSACAG00000002072 | 8664 TRMT11   |
| ENSACAG00000012728 | 8665 C16orf13 |
| ENSACAG00000004860 | 8666 LPAR2    |
| ENSACAG00000016608 | 8667 DOCK9    |
| ENSACAG00000002292 | 8668 VIPR2    |
| ENSACAG00000012312 | 8669          |
| ENSACAG00000008668 | 8670 AGXT2    |
| ENSACAG00000000487 | 8671 RAB26    |
| ENSACAG00000010616 | 8672 CCDC14   |
| ENSACAG00000027465 | 8673 AUTS2    |
| ENSACAG00000000684 | 8674          |
| ENSACAG00000009728 | 8675          |
| ENSACAG00000011870 | 8676 LAMA4    |
| ENSACAG00000016232 | 8677 PLD1     |
| ENSACAG00000001620 | 8678 DHRS7B   |
| ENSACAG00000012827 | 8679          |
| ENSACAG00000015743 | 8680 E2F8     |
| ENSACAG00000011551 | 8681 MEPCE    |
| ENSACAG00000015289 | 8682 MPDU1    |
| ENSACAG00000024053 | 8683 B3GNT4   |
| ENSACAG00000007913 | 8684 GREB1L   |
| ENSACAG00000006158 | 8685          |
| ENSACAG00000022093 | 8686 VARS2    |
| ENSACAG00000012367 | 8687 DCN      |
| ENSACAG00000004077 | 8688 HARBI1   |
| ENSACAG00000013727 | 8689 MLST8    |
| ENSACAG00000012846 | 8690 EPG5     |
| ENSACAG00000003378 | 8691 SYNC     |
| ENSACAG00000005632 | 8692 TOX      |

|                    |                 |
|--------------------|-----------------|
| ENSACAG00000003448 | 8693 KCTD5      |
| ENSACAG00000000855 | 8694 ALKBH3     |
| ENSACAG00000005621 | 8695 UHMK1      |
| ENSACAG00000010430 | 8696 HOXA2      |
| ENSACAG00000029192 | 8697 SRD5A1     |
| ENSACAG00000009179 | 8698 ARL6       |
| ENSACAG00000013796 | 8699 E4F1       |
| ENSACAG00000012265 | 8700 PKP2       |
| ENSACAG00000014961 | 8701 CNTN3      |
| ENSACAG00000005708 | 8702 PIGH       |
| ENSACAG00000022172 | 8703            |
| ENSACAG00000015337 | 8704 TBC1D2B    |
| ENSACAG00000000773 | 8705 IL1RAP     |
| ENSACAG00000012140 | 8706 NKRF       |
| ENSACAG00000003773 | 8707 KLC2       |
| ENSACAG00000012510 | 8708 SMPD1      |
| ENSACAG00000015642 | 8709 C4orf27    |
| ENSACAG00000019516 | 8710 5S_rRNA    |
| ENSACAG00000014082 | 8711 RIT2       |
| ENSACAG00000005431 | 8712 SNTG2      |
| ENSACAG00000000502 | 8713 GAPVD1     |
| ENSACAG00000004106 | 8714            |
| ENSACAG00000022407 | 8715            |
| ENSACAG00000009406 | 8716 GRIA1      |
| ENSACAG00000012520 | 8717 SETD4      |
| ENSACAG00000008974 | 8718 GPN1       |
| ENSACAG00000016826 | 8719            |
| ENSACAG00000010387 | 8720 SBNO2      |
| ENSACAG00000001279 | 8721 KCNIP4     |
| ENSACAG00000029096 | 8722 FTCDNL1    |
| ENSACAG00000009171 | 8723 CCDC130    |
| ENSACAG00000001627 | 8724 DLG2       |
| ENSACAG00000000698 | 8725            |
| ENSACAG00000017751 | 8726 ST6GALNAC6 |
| ENSACAG00000003012 | 8727 RBPMS      |
| ENSACAG00000029589 | 8728            |
| ENSACAG00000014140 | 8729 L3MBTL3    |
| ENSACAG00000001191 | 8730 FAM189A2   |
| ENSACAG00000004573 | 8731 GLMN       |
| ENSACAG00000027084 | 8732            |
| ENSACAG00000006396 | 8733 CPNE2      |
| ENSACAG00000011262 | 8734            |



|                    |               |
|--------------------|---------------|
| ENSACAG00000018307 | 8735          |
| ENSACAG00000015777 | 8736 MTERF1   |
| ENSACAG00000015267 | 8737 TMEM8A   |
| ENSACAG00000010091 | 8738          |
| ENSACAG00000009971 | 8739 MYD88    |
| ENSACAG00000010002 | 8740          |
| ENSACAG00000002919 | 8741 NOD1     |
| ENSACAG00000027155 | 8742          |
| ENSACAG00000005441 | 8743 ATN1     |
| ENSACAG00000003801 | 8744          |
| ENSACAG00000002928 | 8745 MFHAS1   |
| ENSACAG00000017534 | 8746          |
| ENSACAG00000020535 | 8747 5S_rRNA  |
| ENSACAG00000011658 | 8748 KRT8     |
| ENSACAG00000005527 | 8749 RBM10    |
| ENSACAG00000003230 | 8750          |
| ENSACAG00000011534 | 8751 CTC1     |
| ENSACAG00000026105 | 8752          |
| ENSACAG00000015291 | 8753 WRAP73   |
| ENSACAG00000028085 | 8754          |
| ENSACAG00000023311 | 8755          |
| ENSACAG00000005271 | 8756 XYLT2    |
| ENSACAG00000005407 | 8757 MMP24    |
| ENSACAG00000003558 | 8758 LYPD6    |
| ENSACAG00000004495 | 8759 FBXW2    |
| ENSACAG00000024808 | 8760          |
| ENSACAG00000000265 | 8761 GRTP1    |
| ENSACAG00000011884 | 8762 CACNA2D3 |
| ENSACAG00000004764 | 8763 SLC24A5  |
| ENSACAG00000007946 | 8764 NPAS2    |
| ENSACAG00000016514 | 8765 SNRNP25  |
| ENSACAG00000000230 | 8766 ANK3     |
| ENSACAG00000007916 | 8767 CRHBP    |
| ENSACAG00000003641 | 8768 CPPED1   |
| ENSACAG00000014734 | 8769 MED4     |
| ENSACAG00000001978 | 8770 COG4     |
| ENSACAG00000016013 | 8771 TYW5     |
| ENSACAG00000000193 | 8772 NSUN5    |
| ENSACAG00000011379 | 8773          |
| ENSACAG00000011872 | 8774 TMEM199  |
| ENSACAG00000012131 | 8775          |
| ENSACAG00000011075 | 8776          |

|                    |               |
|--------------------|---------------|
| ENSACAG00000011622 | 8777          |
| ENSACAG00000029159 | 8778          |
| ENSACAG00000009165 | 8779 SMCR8    |
| ENSACAG00000013504 | 8780 ZNF704   |
| ENSACAG00000008804 | 8781 NCKAP5L  |
| ENSACAG00000015112 | 8782 CORO1A   |
| ENSACAG00000029424 | 8783 FAM178B  |
| ENSACAG00000015913 | 8784 NLN      |
| ENSACAG00000012321 | 8785 COL4A5   |
| ENSACAG00000024796 | 8786          |
| ENSACAG00000009439 | 8787 PARP11   |
| ENSACAG00000015103 | 8788 PDE6G    |
| ENSACAG00000014481 | 8789          |
| ENSACAG00000004015 | 8790          |
| ENSACAG00000028442 | 8791 NUDT8    |
| ENSACAG00000000270 | 8792          |
| ENSACAG00000009448 | 8793 VT11A    |
| ENSACAG00000009777 | 8794          |
| ENSACAG00000003905 | 8795 PARD6B   |
| ENSACAG00000000654 | 8796          |
| ENSACAG00000011913 | 8797 DFFA     |
| ENSACAG00000011965 | 8798 ZBTB5    |
| ENSACAG00000001599 | 8799          |
| ENSACAG00000022636 | 8800 SCYL1    |
| ENSACAG00000003487 | 8801 PVRL1    |
| ENSACAG00000027028 | 8802          |
| ENSACAG00000007819 | 8803 MXD4     |
| ENSACAG00000009755 | 8804 DDX28    |
| ENSACAG00000008280 | 8805 SRPK3    |
| ENSACAG00000014108 | 8806          |
| ENSACAG00000002600 | 8807 CCDC57   |
| ENSACAG00000001288 | 8808 LRRC8B   |
| ENSACAG00000007172 | 8809 ACRC     |
| ENSACAG00000013121 | 8810 EFCC1    |
| ENSACAG00000017746 | 8811 CYB561A3 |
| ENSACAG00000018000 | 8812 LETM2    |
| ENSACAG00000004548 | 8813 ACTL6A   |
| ENSACAG00000014358 | 8814 NPR2     |
| ENSACAG00000009731 | 8815 METTL21A |
| ENSACAG00000003787 | 8816 DPY19L4  |
| ENSACAG00000029260 | 8817          |
| ENSACAG00000027037 | 8818          |

|                    |               |
|--------------------|---------------|
| ENSACAG00000000449 | 8819 CCDC94   |
| ENSACAG00000017177 | 8820 TMUB2    |
| ENSACAG00000001696 | 8821 GNG4     |
| ENSACAG00000011816 | 8822          |
| ENSACAG00000008595 | 8823 LRRC49   |
| ENSACAG00000014407 | 8824          |
| ENSACAG00000017328 | 8825          |
| ENSACAG00000012185 | 8826 KIAA2013 |
| ENSACAG00000008786 | 8827          |
| ENSACAG00000003113 | 8828 BMP2     |
| ENSACAG00000003738 | 8829 WWP2     |
| ENSACAG00000017980 | 8830          |
| ENSACAG00000005144 | 8831 MARCH1   |
| ENSACAG00000005306 | 8832 EXD2     |
| ENSACAG00000022586 | 8833          |
| ENSACAG00000006409 | 8834          |
| ENSACAG00000006407 | 8835          |
| ENSACAG00000006995 | 8836          |
| ENSACAG00000001387 | 8837          |
| ENSACAG00000016031 | 8838          |
| ENSACAG00000000697 | 8839          |
| ENSACAG00000027589 | 8840          |
| ENSACAG00000011732 | 8841 DOK6     |
| ENSACAG00000009503 | 8842 RNF215   |
| ENSACAG00000025459 | 8843          |
| ENSACAG00000011238 | 8844 CAPN10   |
| ENSACAG00000016517 | 8845 NECAP2   |
| ENSACAG00000009646 | 8846 ALKBH5   |
| ENSACAG00000000184 | 8847 CACNG4   |
| ENSACAG00000001032 | 8848 PRCP     |
| ENSACAG00000010606 | 8849 TMEM55A  |
| ENSACAG00000017950 | 8850 ASTN2    |
| ENSACAG00000001281 | 8851 PIP5K1B  |
| ENSACAG00000009735 | 8852 COMMD7   |
| ENSACAG00000009033 | 8853 ACVR2B   |
| ENSACAG00000022568 | 8854          |
| ENSACAG00000016516 | 8855 OARD1    |
| ENSACAG00000009131 | 8856          |
| ENSACAG00000029691 | 8857          |
| ENSACAG00000012743 | 8858 PNKP     |
| ENSACAG00000015989 | 8859 DUSP2    |
| ENSACAG00000002999 | 8860          |

|                    |               |
|--------------------|---------------|
| ENSACAG00000015065 | 8861          |
| ENSACAG00000017285 | 8862 ZC3H12A  |
| ENSACAG00000003860 | 8863 ZNF408   |
| ENSACAG00000001758 | 8864 FAM173A  |
| ENSACAG00000005410 | 8865 FGFR4    |
| ENSACAG00000003110 | 8866 ARHGAP15 |
| ENSACAG00000009659 | 8867 EPB41L3  |
| ENSACAG00000013675 | 8868          |
| ENSACAG00000015611 | 8869 PITPNM2  |
| ENSACAG00000010473 | 8870 PDPR     |
| ENSACAG00000014677 | 8871 TELO2    |
| ENSACAG00000010663 | 8872 SCARF2   |
| ENSACAG00000012688 | 8873 SCX      |
| ENSACAG00000009135 | 8874          |
| ENSACAG00000010883 | 8875 EHMT2    |
| ENSACAG00000001407 | 8876 CPNE4    |
| ENSACAG00000011043 | 8877 MSX1     |
| ENSACAG00000012920 | 8878 NDOR1    |
| ENSACAG00000015937 | 8879 RAMP1    |
| ENSACAG00000027094 | 8880 APOF     |
| ENSACAG00000022405 | 8881          |
| ENSACAG00000017206 | 8882 FGFR2    |
| ENSACAG00000029224 | 8883          |
| ENSACAG00000005488 | 8884          |
| ENSACAG00000001025 | 8885 C9orf135 |
| ENSACAG00000004715 | 8886 PER1     |
| ENSACAG00000015421 | 8887 SNRNP35  |
| ENSACAG00000016851 | 8888          |
| ENSACAG00000014902 | 8889 SFXN1    |
| ENSACAG00000012253 | 8890 HRH2     |
| ENSACAG00000025217 | 8891          |
| ENSACAG00000016638 | 8892 PIGV     |
| ENSACAG00000015166 | 8893          |
| ENSACAG00000003294 | 8894 SIKE1    |
| ENSACAG00000022999 | 8895          |
| ENSACAG00000023950 | 8896          |
| ENSACAG00000010483 | 8897          |
| ENSACAG00000000431 | 8898 C3orf33  |
| ENSACAG00000012248 | 8899 POU6F1   |
| ENSACAG00000015885 | 8900          |
| ENSACAG00000010426 | 8901 WDR18    |
| ENSACAG00000029319 | 8902 ANKRD37  |

|                    |              |
|--------------------|--------------|
| ENSACAG00000025725 | 8903         |
| ENSACAG00000015938 | 8904         |
| ENSACAG00000013024 | 8905 KIF24   |
| ENSACAG00000016873 | 8906 ADA     |
| ENSACAG00000011783 | 8907         |
| ENSACAG00000013716 | 8908 E2F2    |
| ENSACAG00000017603 | 8909         |
| ENSACAG00000014593 | 8910 CMTR2   |
| ENSACAG00000009471 | 8911 TBC1D31 |
| ENSACAG00000000479 | 8912 NSUN3   |
| ENSACAG00000014588 | 8913 AARS2   |
| ENSACAG00000017288 | 8914 PGM3    |
| ENSACAG00000016818 | 8915 NEK3    |
| ENSACAG00000016430 | 8916 RNFT2   |
| ENSACAG00000002750 | 8917 BCS1L   |
| ENSACAG00000002793 | 8918 KCNAB2  |
| ENSACAG00000008925 | 8919 AP1M1   |
| ENSACAG00000001338 | 8920 UPRT    |
| ENSACAG00000013038 | 8921 HSDL1   |
| ENSACAG00000011351 | 8922 MYCN    |
| ENSACAG00000028487 | 8923         |
| ENSACAG00000000170 | 8924 VPS16   |
| ENSACAG00000003895 | 8925 PPP1R3D |
| ENSACAG00000023083 | 8926         |
| ENSACAG00000022278 | 8927 MAMLD1  |
| ENSACAG00000007673 | 8928         |
| ENSACAG00000003367 | 8929 PYROXD2 |
| ENSACAG00000020734 | 8930         |
| ENSACAG00000010998 | 8931 ACOT12  |
| ENSACAG00000012598 | 8932 MAN2C1  |
| ENSACAG00000009157 | 8933 MAGI2   |
| ENSACAG00000022853 | 8934         |
| ENSACAG00000009590 | 8935 DLGAP1  |
| ENSACAG00000009024 | 8936 BCORL1  |
| ENSACAG00000005777 | 8937 SPNS1   |
| ENSACAG00000008222 | 8938 RNF167  |
| ENSACAG00000017987 | 8939         |
| ENSACAG00000029369 | 8940         |
| ENSACAG00000002377 | 8941 SHISA2  |
| ENSACAG00000005396 | 8942 CKM     |
| ENSACAG00000002453 | 8943 TMEM163 |
| ENSACAG00000010588 | 8944 FAM234B |

|                    |              |
|--------------------|--------------|
| ENSACAG00000012464 | 8945         |
| ENSACAG00000016159 | 8946 PMPCA   |
| ENSACAG00000026636 | 8947 TBC1D8B |
| ENSACAG00000017092 | 8948 TTC39A  |
| ENSACAG00000011026 | 8949 KIRREL  |
| ENSACAG00000015590 | 8950 QTRT1   |
| ENSACAG00000006487 | 8951         |
| ENSACAG00000010401 | 8952         |
| ENSACAG00000028911 | 8953 ARL6IP6 |
| ENSACAG00000002199 | 8954 GABBR2  |
| ENSACAG00000029453 | 8955         |
| ENSACAG00000000169 | 8956 MOK     |
| ENSACAG00000002848 | 8957 BCR     |
| ENSACAG00000014525 | 8958 AACS    |
| ENSACAG00000010555 | 8959 WDSUB1  |
| ENSACAG00000020220 | 8960         |
| ENSACAG00000004125 | 8961 TMC2    |
| ENSACAG00000003781 | 8962 CAMKMT  |
| ENSACAG00000013827 | 8963 UNC5C   |
| ENSACAG00000026830 | 8964 MOCS1   |
| ENSACAG00000001775 | 8965         |
| ENSACAG00000003266 | 8966 VCAM1   |
| ENSACAG00000000491 | 8967 CALN1   |
| ENSACAG00000008266 | 8968 FKBP11  |
| ENSACAG00000008910 | 8969         |
| ENSACAG00000007736 | 8970 MAPK7   |
| ENSACAG00000003325 | 8971         |
| ENSACAG00000028426 | 8972         |
| ENSACAG00000007306 | 8973 MAF1    |
| ENSACAG00000007404 | 8974 PLCE1   |
| ENSACAG00000007054 | 8975 MED19   |
| ENSACAG00000016958 | 8976 ELAVL3  |
| ENSACAG00000009127 | 8977 AP1B1   |
| ENSACAG00000022958 | 8978 AQP11   |
| ENSACAG00000016621 | 8979 LIN37   |
| ENSACAG00000017532 | 8980 CHST15  |
| ENSACAG00000023867 | 8981 RIN1    |
| ENSACAG00000015862 | 8982         |
| ENSACAG00000014342 | 8983 SLC35F1 |
| ENSACAG00000011020 | 8984 RHOBTB1 |
| ENSACAG00000006747 | 8985 TMEFF2  |
| ENSACAG00000000696 | 8986 TRPT1   |

|                    |               |
|--------------------|---------------|
| ENSACAG00000015521 | 8987 TADA1    |
| ENSACAG00000004581 | 8988 DCDC2B   |
| ENSACAG00000012418 | 8989 DHX40    |
| ENSACAG00000023208 | 8990 RRP36    |
| ENSACAG00000021042 | 8991 AOA H    |
| ENSACAG00000010774 | 8992 ADCY5    |
| ENSACAG00000026559 | 8993          |
| ENSACAG00000003443 | 8994 RHOV     |
| ENSACAG00000028851 | 8995          |
| ENSACAG00000028361 | 8996 ADAT2    |
| ENSACAG00000007142 | 8997 FAM131B  |
| ENSACAG00000009072 | 8998 CLYBL    |
| ENSACAG00000017268 | 8999 SNIP1    |
| ENSACAG00000017178 | 9000 BCAT2    |
| ENSACAG00000004413 | 9001          |
| ENSACAG00000012411 | 9002          |
| ENSACAG00000001511 | 9003 BTBD3    |
| ENSACAG00000001117 | 9004 ADAP1    |
| ENSACAG00000013615 | 9005 ARL4A    |
| ENSACAG00000028491 | 9006 TMEM17   |
| ENSACAG00000000425 | 9007 FAAH2    |
| ENSACAG00000027090 | 9008          |
| ENSACAG00000006322 | 9009          |
| ENSACAG00000007504 | 9010 NPSR1    |
| ENSACAG00000026280 | 9011 ZBTB4    |
| ENSACAG00000007987 | 9012 F2R      |
| ENSACAG00000014720 | 9013 VAV2     |
| ENSACAG00000002440 | 9014 SLC39A13 |
| ENSACAG00000011357 | 9015          |
| ENSACAG00000029436 | 9016          |
| ENSACAG00000005337 | 9017          |
| ENSACAG00000016661 | 9018 PTER     |
| ENSACAG00000029276 | 9019          |
| ENSACAG00000003853 | 9020 F2       |
| ENSACAG00000007498 | 9021 SRCIN1   |
| ENSACAG00000008625 | 9022          |
| ENSACAG00000007516 | 9023 SLC16A13 |
| ENSACAG00000014297 | 9024 NINL     |
| ENSACAG00000007705 | 9025 BCL7C    |
| ENSACAG00000015999 | 9026          |
| ENSACAG00000013132 | 9027 RBP7     |
| ENSACAG00000010524 | 9028 FBXL4    |

|                    |               |
|--------------------|---------------|
| ENSACAG00000014018 | 9029          |
| ENSACAG00000003616 | 9030 SLC2A4RG |
| ENSACAG00000004171 | 9031 DGKZ     |
| ENSACAG00000015824 | 9032 CARD10   |
| ENSACAG00000013352 | 9033 RTKN     |
| ENSACAG00000005340 | 9034 ZNF236   |
| ENSACAG00000004430 | 9035 PDZD11   |
| ENSACAG00000028325 | 9036          |
| ENSACAG00000010155 | 9037 SHTN1    |
| ENSACAG00000010279 | 9038 RASGEF1B |
| ENSACAG00000006764 | 9039 PNPO     |
| ENSACAG00000010773 | 9040          |
| ENSACAG00000005439 | 9041 RALGAPA2 |
| ENSACAG00000003514 | 9042 CLSTN2   |
| ENSACAG00000005617 | 9043 PLEKHH1  |
| ENSACAG00000004978 | 9044          |
| ENSACAG00000006891 | 9045          |
| ENSACAG00000011022 | 9046 GPAT3    |
| ENSACAG00000002620 | 9047 NPAS3    |
| ENSACAG00000007067 | 9048 PAN2     |
| ENSACAG00000000639 | 9049 WBP1     |
| ENSACAG00000014536 | 9050          |
| ENSACAG00000005032 | 9051 CABLES2  |
| ENSACAG00000012721 | 9052 KCNC4    |
| ENSACAG00000017660 | 9053 PXDC1    |
| ENSACAG00000015025 | 9054 SLC38A9  |
| ENSACAG00000015401 | 9055 RYR3     |
| ENSACAG00000015826 | 9056 DHCR7    |
| ENSACAG00000023059 | 9057          |
| ENSACAG00000025104 | 9058 FAM101B  |
| ENSACAG00000002291 | 9059 DCLRE1B  |
| ENSACAG00000013931 | 9060          |
| ENSACAG00000020063 | 9061          |
| ENSACAG00000009301 | 9062 MDGA1    |
| ENSACAG00000024002 | 9063 POLR2M   |
| ENSACAG00000024282 | 9064          |
| ENSACAG00000015738 | 9065 BDNF     |
| ENSACAG00000010673 | 9066          |
| ENSACAG00000006446 | 9067          |
| ENSACAG00000023149 | 9068 CNIH2    |
| ENSACAG00000006016 | 9069 DNAJA4   |
| ENSACAG00000028931 | 9070 HEMK1    |



|                     |               |
|---------------------|---------------|
| ENSACAG00000007383  | 9071 LIMK1    |
| ENSACAG00000001237  | 9072 TAF5L    |
| ENSACAG000000010834 | 9073 CPOX     |
| ENSACAG00000000205  | 9074 SIAE     |
| ENSACAG000000016668 | 9075 HTATIP2  |
| ENSACAG000000005061 | 9076 EPHA4    |
| ENSACAG00000000013  | 9077 ZNF385D  |
| ENSACAG000000017811 | 9078 MARK4    |
| ENSACAG000000029348 | 9079 NAALADL2 |
| ENSACAG000000004781 | 9080 DUSP3    |
| ENSACAG000000003227 | 9081          |
| ENSACAG000000006074 | 9082 PSAT1    |
| ENSACAG000000022111 | 9083          |
| ENSACAG000000013185 | 9084 DPP7     |
| ENSACAG000000016767 | 9085 SLC9A1   |
| ENSACAG000000011234 | 9086 SLC44A5  |
| ENSACAG000000013143 | 9087 INTS2    |
| ENSACAG000000016473 | 9088 TESC     |
| ENSACAG000000010697 | 9089 C9orf72  |
| ENSACAG000000012274 | 9090 P4HTM    |
| ENSACAG000000016474 | 9091 GTF3C1   |
| ENSACAG000000017654 | 9092 PRDM10   |
| ENSACAG000000012257 | 9093 ZNF536   |
| ENSACAG000000014657 | 9094          |
| ENSACAG000000025358 | 9095          |
| ENSACAG000000013947 | 9096          |
| ENSACAG000000013227 | 9097          |
| ENSACAG000000005398 | 9098 SLC16A14 |
| ENSACAG000000011968 | 9099          |
| ENSACAG000000013998 | 9100 PYGB     |
| ENSACAG000000001330 | 9101 SCG3     |
| ENSACAG000000010865 | 9102 ATL1     |
| ENSACAG000000029100 | 9103          |
| ENSACAG000000016669 | 9104 RHOBTB2  |
| ENSACAG000000003908 | 9105 MDM1     |
| ENSACAG000000005020 | 9106 ZC3H10   |
| ENSACAG000000014728 | 9107 SCNM1    |
| ENSACAG000000027585 | 9108          |
| ENSACAG000000012857 | 9109 PRKAG3   |
| ENSACAG000000022941 | 9110 CDC42SE1 |
| ENSACAG000000028395 | 9111          |
| ENSACAG000000002613 | 9112 DUSP4    |

|                    |               |
|--------------------|---------------|
| ENSACAG00000015388 | 9113 LMOD3    |
| ENSACAG00000014115 | 9114          |
| ENSACAG00000015424 | 9115 RRNAD1   |
| ENSACAG00000004487 | 9116 OLFM2    |
| ENSACAG00000016184 | 9117 PHF12    |
| ENSACAG00000014771 | 9118 CAND2    |
| ENSACAG00000006278 | 9119 C4orf33  |
| ENSACAG00000024132 | 9120          |
| ENSACAG00000016277 | 9121          |
| ENSACAG00000002089 | 9122 NID1     |
| ENSACAG00000001451 | 9123 SLC16A7  |
| ENSACAG00000015606 | 9124 FPGS     |
| ENSACAG00000015953 | 9125 GRM4     |
| ENSACAG00000010366 | 9126          |
| ENSACAG00000003083 | 9127 WASF3    |
| ENSACAG00000001394 | 9128 ENPP3    |
| ENSACAG00000009193 | 9129          |
| ENSACAG00000017677 | 9130 TUBB6    |
| ENSACAG00000014990 | 9131 LRSAM1   |
| ENSACAG00000013505 | 9132          |
| ENSACAG00000013552 | 9133 GPT2     |
| ENSACAG00000005349 | 9134 ABCC1    |
| ENSACAG00000027218 | 9135          |
| ENSACAG00000026540 | 9136 SNAPC2   |
| ENSACAG00000015998 | 9137 C2orf70  |
| ENSACAG00000017785 | 9138 TMEM132A |
| ENSACAG00000020934 | 9139          |
| ENSACAG00000005541 | 9140 DCP1B    |
| ENSACAG00000008287 | 9141 NCAM1    |
| ENSACAG00000002732 | 9142 TCF7     |
| ENSACAG00000003068 | 9143 MINK1    |
| ENSACAG00000007509 | 9144          |
| ENSACAG00000004789 | 9145 RWDD3    |
| ENSACAG00000028356 | 9146          |
| ENSACAG00000011024 | 9147 DENND2A  |
| ENSACAG00000026340 | 9148          |
| ENSACAG00000025630 | 9149          |
| ENSACAG00000002534 | 9150 HPS1     |
| ENSACAG00000014473 | 9151 ACSS3    |
| ENSACAG00000010459 | 9152 IGLON5   |
| ENSACAG00000007058 | 9153 NFIC     |
| ENSACAG00000012311 | 9154 HPS6     |

|                    |              |
|--------------------|--------------|
| ENSACAG00000007414 | 9155 PPP6R2  |
| ENSACAG00000009284 | 9156 PRMT8   |
| ENSACAG00000013322 | 9157         |
| ENSACAG00000015113 | 9158 BTBD11  |
| ENSACAG00000025135 | 9159         |
| ENSACAG00000010278 | 9160 NOTUM   |
| ENSACAG00000025291 | 9161         |
| ENSACAG00000003704 | 9162 TUBGCP4 |
| ENSACAG00000009287 | 9163 RAB3C   |
| ENSACAG00000017174 | 9164 PHLDB1  |
| ENSACAG00000005356 | 9165 SH3YL1  |
| ENSACAG00000013214 | 9166 ICA1    |
| ENSACAG00000003865 | 9167 YIF1A   |
| ENSACAG00000005954 | 9168 SPATA18 |
| ENSACAG00000013150 | 9169 FAM20A  |
| ENSACAG00000014380 | 9170 SLC4A3  |
| ENSACAG00000005866 | 9171 ADD2    |
| ENSACAG00000005889 | 9172 USP46   |
| ENSACAG00000011678 | 9173 NELFE   |
| ENSACAG00000015074 | 9174         |
| ENSACAG00000014253 | 9175         |
| ENSACAG00000029122 | 9176 CISD3   |
| ENSACAG00000000231 | 9177 RHBDL1  |
| ENSACAG00000010751 | 9178 GPR161  |
| ENSACAG00000014754 | 9179         |
| ENSACAG00000027222 | 9180 RGL4    |
| ENSACAG00000002711 | 9181 ZNF142  |
| ENSACAG00000014740 | 9182 ZFP36L2 |
| ENSACAG00000029565 | 9183         |
| ENSACAG00000022173 | 9184         |
| ENSACAG00000005551 | 9185         |
| ENSACAG00000009821 | 9186 SATB2   |
| ENSACAG00000003983 | 9187 TNFAIP8 |
| ENSACAG00000011417 | 9188 PDZD4   |
| ENSACAG00000008721 | 9189 HADHB   |
| ENSACAG00000021169 | 9190 U5      |
| ENSACAG00000008898 | 9191         |
| ENSACAG00000007412 | 9192 KLHL5   |
| ENSACAG00000010661 | 9193 SIRT6   |
| ENSACAG00000013374 | 9194 GNPDA1  |
| ENSACAG00000011785 | 9195 DGKI    |
| ENSACAG00000010916 | 9196 ATXN7L2 |

|                    |               |
|--------------------|---------------|
| ENSACAG00000028537 | 9197 BCL2L12  |
| ENSACAG00000000669 | 9198 PTPDC1   |
| ENSACAG00000016936 | 9199 NKIRAS2  |
| ENSACAG00000026388 | 9200          |
| ENSACAG00000007375 | 9201 CELSR1   |
| ENSACAG00000003498 | 9202 TRMT13   |
| ENSACAG00000017710 | 9203 NTN1     |
| ENSACAG00000016032 | 9204 WDR89    |
| ENSACAG00000010209 | 9205 CCDC80   |
| ENSACAG00000006738 | 9206 ARL2BP   |
| ENSACAG00000014221 | 9207 CHRDL2   |
| ENSACAG00000007952 | 9208 MFN2     |
| ENSACAG00000000848 | 9209 NELFCD   |
| ENSACAG00000010227 | 9210          |
| ENSACAG00000023499 | 9211          |
| ENSACAG00000001390 | 9212 ANKRD42  |
| ENSACAG00000016050 | 9213 CBX2     |
| ENSACAG00000003350 | 9214          |
| ENSACAG00000004092 | 9215 ITGA1    |
| ENSACAG00000000728 | 9216 MAP10    |
| ENSACAG00000006460 | 9217 DNAJB13  |
| ENSACAG00000017409 | 9218 ELOVL4   |
| ENSACAG00000013629 | 9219 LYSMD3   |
| ENSACAG00000004143 | 9220 MTERF3   |
| ENSACAG00000000329 | 9221          |
| ENSACAG00000015749 | 9222          |
| ENSACAG00000019028 | 9223          |
| ENSACAG00000000944 | 9224 DAB2IP   |
| ENSACAG00000020645 | 9225 5S_rRNA  |
| ENSACAG00000000052 | 9226 OTOG     |
| ENSACAG00000016347 | 9227 FOXRED2  |
| ENSACAG00000017662 | 9228          |
| ENSACAG00000002752 | 9229 C5orf63  |
| ENSACAG00000015693 | 9230 SPRY3    |
| ENSACAG00000001947 | 9231 SCUBE3   |
| ENSACAG00000009241 | 9232 EPHB1    |
| ENSACAG00000015129 | 9233 PCNXL4   |
| ENSACAG00000029027 | 9234          |
| ENSACAG00000004405 | 9235 KIAA1143 |
| ENSACAG00000001550 | 9236          |
| ENSACAG00000002247 | 9237          |
| ENSACAG00000008072 | 9238 CLPB     |

|                     |                |
|---------------------|----------------|
| ENSACAG00000001271  | 9239 TMEM209   |
| ENSACAG00000003486  | 9240 TAF6L     |
| ENSACAG00000001171  | 9241           |
| ENSACAG00000005141  | 9242 PRR5L     |
| ENSACAG000000011453 | 9243 CEMIP     |
| ENSACAG00000002990  | 9244 MTMR8     |
| ENSACAG000000028283 | 9245           |
| ENSACAG000000016297 | 9246 MAPK1IP1L |
| ENSACAG00000004800  | 9247 HYPK      |
| ENSACAG000000011948 | 9248 ADGRG2    |
| ENSACAG000000001821 | 9249 PYCRL     |
| ENSACAG000000014996 | 9250 FAM118A   |
| ENSACAG000000009969 | 9251 EVI5L     |
| ENSACAG000000015222 | 9252 FKBP15    |
| ENSACAG000000029291 | 9253 PLPPR5    |
| ENSACAG000000014623 | 9254 ZCCHC14   |
| ENSACAG000000011009 | 9255           |
| ENSACAG000000004699 | 9256 ANKDD1A   |
| ENSACAG000000002271 | 9257 PLCB4     |
| ENSACAG000000021160 | 9258 SCARNA13  |
| ENSACAG000000016354 | 9259           |
| ENSACAG000000007106 | 9260 RNF112    |
| ENSACAG000000014938 | 9261 IL31RA    |
| ENSACAG000000012671 | 9262 BCAS1     |
| ENSACAG000000017713 | 9263 SYT7      |
| ENSACAG000000006511 | 9264           |
| ENSACAG000000001723 | 9265 L2HGDH    |
| ENSACAG000000015829 | 9266 KIAA1644  |
| ENSACAG000000022527 | 9267           |
| ENSACAG000000004819 | 9268 ZBTB8A    |
| ENSACAG000000009949 | 9269 EFNB3     |
| ENSACAG000000016479 | 9270 FBXO2     |
| ENSACAG000000002947 | 9271 PUS10     |
| ENSACAG000000010309 | 9272 SPON2     |
| ENSACAG000000003118 | 9273 POMGNT2   |
| ENSACAG000000017897 | 9274 EFHC2     |
| ENSACAG000000012059 | 9275 FBXO10    |
| ENSACAG000000000920 | 9276 UROS      |
| ENSACAG000000003643 | 9277 RAB35     |
| ENSACAG000000028765 | 9278 DGUOK     |
| ENSACAG000000010362 | 9279           |
| ENSACAG000000005992 | 9280 KNDC1     |

|                     |                |
|---------------------|----------------|
| ENSACAG00000003231  | 9281 ADARB2    |
| ENSACAG00000000125  | 9282           |
| ENSACAG000000028731 | 9283 C2orf80   |
| ENSACAG000000008966 | 9284 ZW10      |
| ENSACAG000000004360 | 9285 GPR19     |
| ENSACAG00000003336  | 9286           |
| ENSACAG000000005607 | 9287 PCDH15    |
| ENSACAG000000012158 | 9288           |
| ENSACAG00000003085  | 9289           |
| ENSACAG000000025590 | 9290 SLC6A12   |
| ENSACAG000000013403 | 9291 NUMBL     |
| ENSACAG000000009039 | 9292 PTGES     |
| ENSACAG000000026389 | 9293           |
| ENSACAG000000004837 | 9294 FKBP8     |
| ENSACAG000000004484 | 9295           |
| ENSACAG000000027432 | 9296           |
| ENSACAG000000011002 | 9297 SBK2      |
| ENSACAG000000026906 | 9298           |
| ENSACAG000000000683 | 9299 SMYD5     |
| ENSACAG000000024407 | 9300           |
| ENSACAG000000014875 | 9301 NOX4      |
| ENSACAG000000003244 | 9302 CCNJL     |
| ENSACAG000000026867 | 9303           |
| ENSACAG000000015827 | 9304 PTGIS     |
| ENSACAG000000007886 | 9305 PPP1R3C   |
| ENSACAG000000001102 | 9306 TUBB1     |
| ENSACAG000000000343 | 9307 UNC5D     |
| ENSACAG000000009441 | 9308           |
| ENSACAG000000020408 | 9309           |
| ENSACAG00000001018  | 9310           |
| ENSACAG000000028467 | 9311           |
| ENSACAG000000011655 | 9312 DRGX      |
| ENSACAG000000006137 | 9313 ADCYAP1R1 |
| ENSACAG000000015812 | 9314 NSDHL     |
| ENSACAG000000009303 | 9315 EYS       |
| ENSACAG000000013267 | 9316 UBR4      |
| ENSACAG000000006309 | 9317 PC        |
| ENSACAG000000002231 | 9318           |
| ENSACAG000000008669 | 9319           |
| ENSACAG000000013349 | 9320 PIGC      |
| ENSACAG000000011909 | 9321 RGN       |
| ENSACAG000000012218 | 9322 UNC119    |

|                    |               |
|--------------------|---------------|
| ENSACAG00000009336 | 9323 DOK1     |
| ENSACAG00000012067 | 9324 LIMCH1   |
| ENSACAG00000012717 | 9325 WFIKKN1  |
| ENSACAG00000024762 | 9326 TNK2     |
| ENSACAG00000022604 | 9327 C19orf44 |
| ENSACAG00000006996 | 9328 TSPAN17  |
| ENSACAG00000002819 | 9329 PISD     |
| ENSACAG00000012283 | 9330 RENBP    |
| ENSACAG00000013004 | 9331 APIP     |
| ENSACAG00000027759 | 9332          |
| ENSACAG00000011023 | 9333 ZNF628   |
| ENSACAG00000016810 | 9334 RAB3D    |
| ENSACAG00000024675 | 9335          |
| ENSACAG00000008730 | 9336 IQCE     |
| ENSACAG00000011694 | 9337 PTPRN2   |
| ENSACAG00000006518 | 9338 NRP1     |
| ENSACAG00000014917 | 9339 SPATA17  |
| ENSACAG00000016418 | 9340 RGS6     |
| ENSACAG00000006707 | 9341 RNF166   |
| ENSACAG00000002219 | 9342 GOLGB1   |
| ENSACAG00000022245 | 9343          |
| ENSACAG00000001358 | 9344 GFOD2    |
| ENSACAG00000013564 | 9345          |
| ENSACAG00000010258 | 9346 GTF2H4   |
| ENSACAG00000009280 | 9347 NTF3     |
| ENSACAG00000006073 | 9348 RPP25L   |
| ENSACAG00000001645 | 9349 PUF60    |
| ENSACAG00000017790 | 9350 PDIK1L   |
| ENSACAG00000003557 | 9351 POPDC2   |
| ENSACAG00000016189 | 9352 TSEN34   |
| ENSACAG00000004231 | 9353 COL6A3   |
| ENSACAG00000012278 | 9354          |
| ENSACAG00000012007 | 9355 HDHD2    |
| ENSACAG00000013684 | 9356 C8orf48  |
| ENSACAG00000000374 | 9357 FHOD1    |
| ENSACAG00000018156 | 9358 SNORA26  |
| ENSACAG00000006551 | 9359          |
| ENSACAG00000013757 | 9360 KPTN     |
| ENSACAG00000023634 | 9361          |
| ENSACAG00000025303 | 9362 SLC22A4  |
| ENSACAG00000017443 | 9363 STON2    |
| ENSACAG00000009293 | 9364          |

|                    |               |
|--------------------|---------------|
| ENSACAG00000008186 | 9365          |
| ENSACAG00000025274 | 9366          |
| ENSACAG00000003438 | 9367          |
| ENSACAG00000011545 | 9368 SENP8    |
| ENSACAG00000013787 | 9369 PELP1    |
| ENSACAG00000003847 | 9370 SYT2     |
| ENSACAG00000015487 | 9371 TCP11L2  |
| ENSACAG00000009197 | 9372 SASH3    |
| ENSACAG00000014596 | 9373          |
| ENSACAG00000016874 | 9374 MYO3B    |
| ENSACAG00000006061 | 9375 SHROOM4  |
| ENSACAG00000002799 | 9376 WDR27    |
| ENSACAG00000002056 | 9377 TAF4B    |
| ENSACAG00000000363 | 9378 IMPDH1   |
| ENSACAG00000010708 | 9379 COQ2     |
| ENSACAG00000027835 | 9380          |
| ENSACAG00000011077 | 9381 CACNA1C  |
| ENSACAG00000007361 | 9382 EPB41L4A |
| ENSACAG00000003442 | 9383 TBC1D30  |
| ENSACAG00000011365 | 9384 KLHL29   |
| ENSACAG00000000386 | 9385 LIPI     |
| ENSACAG00000028677 | 9386          |
| ENSACAG00000029161 | 9387 JKAMP    |
| ENSACAG00000025624 | 9388          |
| ENSACAG00000012177 | 9389 DOLK     |
| ENSACAG00000000703 | 9390          |
| ENSACAG00000012427 | 9391 GALNT13  |
| ENSACAG00000004425 | 9392          |
| ENSACAG00000028856 | 9393 ALDH16A1 |
| ENSACAG00000012809 | 9394          |
| ENSACAG00000028833 | 9395 FAM227A  |
| ENSACAG00000008512 | 9396 CRELD1   |
| ENSACAG00000022633 | 9397 ICE2     |
| ENSACAG00000014461 | 9398 TSPAN18  |
| ENSACAG00000011822 | 9399 GCK      |
| ENSACAG00000022596 | 9400 AGBL1    |
| ENSACAG00000002921 | 9401 TOX4     |
| ENSACAG00000005949 | 9402 PTPN18   |
| ENSACAG00000007286 | 9403          |
| ENSACAG00000008687 | 9404 BRAT1    |
| ENSACAG00000022998 | 9405 UNC45A   |
| ENSACAG00000014579 | 9406 ASTN1    |



|                    |              |
|--------------------|--------------|
| ENSACAG00000003615 | 9407 RNF126  |
| ENSACAG00000011955 | 9408 FAM124A |
| ENSACAG00000002984 | 9409         |
| ENSACAG00000017888 | 9410 GNG2    |
| ENSACAG00000015916 | 9411 GALK2   |
| ENSACAG00000008376 | 9412         |
| ENSACAG00000003697 | 9413 NOB1    |
| ENSACAG00000000967 | 9414 VPS26B  |
| ENSACAG00000011646 | 9415 PAX5    |
| ENSACAG00000008427 | 9416 SH2D7   |
| ENSACAG00000003540 | 9417 GGACT   |
| ENSACAG00000020661 | 9418 SNORA73 |
| ENSACAG00000017102 | 9419 LRRC32  |
| ENSACAG00000011998 | 9420         |
| ENSACAG00000000647 | 9421 AP5M1   |
| ENSACAG00000013531 | 9422 KCTD15  |
| ENSACAG00000008197 | 9423 ZPBP    |
| ENSACAG00000009516 | 9424 CFAP221 |
| ENSACAG00000013559 | 9425 AARSD1  |
| ENSACAG00000008943 | 9426 PLEKHA2 |
| ENSACAG00000008176 | 9427         |
| ENSACAG00000006619 | 9428 GLYCTK  |
| ENSACAG00000000891 | 9429 MDGA2   |
| ENSACAG00000014873 | 9430         |
| ENSACAG00000016086 | 9431 KCTD18  |
| ENSACAG00000014260 | 9432 GTSF1   |
| ENSACAG00000013758 | 9433         |
| ENSACAG00000003955 | 9434 KLHL28  |
| ENSACAG00000002449 | 9435 BTD     |
| ENSACAG00000012048 | 9436         |
| ENSACAG00000027275 | 9437         |
| ENSACAG00000008550 | 9438 COBL    |
| ENSACAG00000004583 | 9439         |
| ENSACAG00000000095 | 9440 SHANK3  |
| ENSACAG00000010936 | 9441 VPS51   |
| ENSACAG00000001205 | 9442 SYNPR   |
| ENSACAG00000016087 | 9443 SS18L1  |
| ENSACAG00000013781 | 9444 TESK1   |
| ENSACAG00000017700 | 9445 FAM184A |
| ENSACAG00000009117 | 9446 NEFH    |
| ENSACAG00000004524 | 9447 RASL12  |
| ENSACAG00000010411 | 9448 SLC39A1 |

|                    |              |
|--------------------|--------------|
| ENSACAG00000006654 | 9449 MVD     |
| ENSACAG00000025066 | 9450         |
| ENSACAG00000009830 | 9451 CERS3   |
| ENSACAG00000012958 | 9452         |
| ENSACAG00000002346 | 9453 EPHX2   |
| ENSACAG00000002627 | 9454         |
| ENSACAG00000008818 | 9455 ZNF341  |
| ENSACAG00000005747 | 9456 FNDC7   |
| ENSACAG00000026322 | 9457         |
| ENSACAG00000003433 | 9458 SLC1A1  |
| ENSACAG00000004513 | 9459 B4GALT4 |
| ENSACAG00000000440 | 9460 MTMR4   |
| ENSACAG00000011805 | 9461 FKRP    |
| ENSACAG00000003197 | 9462         |
| ENSACAG00000023202 | 9463         |
| ENSACAG00000009625 | 9464         |
| ENSACAG00000007683 | 9465 CAPZB   |
| ENSACAG00000000712 | 9466 ACAD11  |
| ENSACAG00000015132 | 9467 ABHD10  |
| ENSACAG00000006367 | 9468 FBXL13  |
| ENSACAG00000025900 | 9469         |
| ENSACAG00000005171 | 9470 RSAD1   |
| ENSACAG00000017829 | 9471 AHDC1   |
| ENSACAG00000003963 | 9472 CYB5R4  |
| ENSACAG00000013795 | 9473 NEK10   |
| ENSACAG00000005574 | 9474 HS3ST1  |
| ENSACAG00000001352 | 9475 GRM8    |
| ENSACAG00000008200 | 9476 KIF7    |
| ENSACAG00000009953 | 9477 DHDDS   |
| ENSACAG00000016775 | 9478 NR4A1   |
| ENSACAG00000004703 | 9479 DDX54   |
| ENSACAG00000014064 | 9480 NEURL2  |
| ENSACAG00000016436 | 9481 GSG1L   |
| ENSACAG00000009926 | 9482 CAMK1   |
| ENSACAG00000007012 | 9483         |
| ENSACAG00000029341 | 9484         |
| ENSACAG00000004038 | 9485 PPOX    |
| ENSACAG00000008983 | 9486 RALY    |
| ENSACAG00000027061 | 9487         |
| ENSACAG00000003122 | 9488 MAU2    |
| ENSACAG00000012883 | 9489 FRMD8   |
| ENSACAG00000017730 | 9490 SNX19   |

|                    |               |
|--------------------|---------------|
| ENSACAG00000012419 | 9491 FIGF     |
| ENSACAG00000003030 | 9492 REL      |
| ENSACAG00000015174 | 9493 FAAP100  |
| ENSACAG00000009442 | 9494          |
| ENSACAG00000005307 | 9495          |
| ENSACAG00000007742 | 9496 ATP2C2   |
| ENSACAG00000022376 | 9497          |
| ENSACAG00000004617 | 9498 CSMD1    |
| ENSACAG00000023243 | 9499          |
| ENSACAG00000001368 | 9500 ARHGAP20 |
| ENSACAG00000012640 | 9501 TSPAN13  |
| ENSACAG00000006219 | 9502 SLC22A17 |
| ENSACAG00000006647 | 9503          |
| ENSACAG00000011592 | 9504 ABLIM2   |
| ENSACAG00000002658 | 9505          |
| ENSACAG00000015602 | 9506 RNF180   |
| ENSACAG00000014670 | 9507 JMJD7    |
| ENSACAG00000003288 | 9508 CLHC1    |
| ENSACAG00000002906 | 9509 STK36    |
| ENSACAG00000016300 | 9510 SOCS4    |
| ENSACAG00000008085 | 9511 DHODH    |
| ENSACAG00000028683 | 9512          |
| ENSACAG00000006032 | 9513 CNTNAP5  |
| ENSACAG00000008369 | 9514 LRRC3    |
| ENSACAG00000026570 | 9515 KCNB2    |
| ENSACAG00000003931 | 9516 MOCS3    |
| ENSACAG00000013008 | 9517          |
| ENSACAG00000012415 | 9518 P4HA2    |
| ENSACAG00000001515 | 9519 FRMPD4   |
| ENSACAG00000026968 | 9520          |
| ENSACAG00000024445 | 9521          |
| ENSACAG00000025002 | 9522          |
| ENSACAG00000017510 | 9523 SIRT3    |
| ENSACAG00000003306 | 9524 LSM11    |
| ENSACAG00000012955 | 9525          |
| ENSACAG00000027170 | 9526          |
| ENSACAG00000025572 | 9527          |
| ENSACAG00000027691 | 9528          |
| ENSACAG00000011627 | 9529 VSTM4    |
| ENSACAG00000015104 | 9530 KBTBD8   |
| ENSACAG00000013985 | 9531 PXYLP1   |
| ENSACAG00000007225 | 9532 HPS3     |

|                    |               |
|--------------------|---------------|
| ENSACAG00000005385 | 9533          |
| ENSACAG00000014857 | 9534 SLC25A11 |
| ENSACAG00000012173 | 9535          |
| ENSACAG00000014935 | 9536 PSMD4    |
| ENSACAG00000006638 | 9537 ARID5A   |
| ENSACAG00000016280 | 9538 OSR2     |
| ENSACAG00000006178 | 9539 CCNJ     |
| ENSACAG00000008354 | 9540 CACHD1   |
| ENSACAG00000025131 | 9541 PRX      |
| ENSACAG00000007839 | 9542 AHSG     |
| ENSACAG00000002729 | 9543 FBXO18   |
| ENSACAG00000006284 | 9544 GSAP     |
| ENSACAG00000008894 | 9545 GNAT1    |
| ENSACAG00000000418 | 9546          |
| ENSACAG00000013014 | 9547          |
| ENSACAG00000004399 | 9548 RELA     |
| ENSACAG00000004485 | 9549 LGR6     |
| ENSACAG00000004036 | 9550 SNUPN    |
| ENSACAG00000006236 | 9551 PCMTD2   |
| ENSACAG00000005837 | 9552          |
| ENSACAG00000001482 | 9553 TMOD2    |
| ENSACAG00000024265 | 9554          |
| ENSACAG00000011132 | 9555 NOTCH1   |
| ENSACAG00000027860 | 9556 FPGT     |
| ENSACAG00000016953 | 9557          |
| ENSACAG00000016759 | 9558 FAM83B   |
| ENSACAG00000023821 | 9559 ARHGAP33 |
| ENSACAG00000006602 | 9560 ZNF282   |
| ENSACAG00000010503 | 9561 FAM151B  |
| ENSACAG00000006410 | 9562 PPL      |
| ENSACAG00000024934 | 9563 ATF5     |
| ENSACAG00000027656 | 9564          |
| ENSACAG00000004913 | 9565          |
| ENSACAG00000024717 | 9566          |
| ENSACAG00000018092 | 9567 SNORA5   |
| ENSACAG00000008628 | 9568 AMZ1     |
| ENSACAG00000001748 | 9569 ASTE1    |
| ENSACAG00000009440 | 9570          |
| ENSACAG00000025288 | 9571 CD80     |
| ENSACAG00000005149 | 9572          |
| ENSACAG00000016384 | 9573 SPAG1    |
| ENSACAG00000015808 | 9574 SCUBE1   |

|                     |               |
|---------------------|---------------|
| ENSACAG00000018482  | 9575 7SK      |
| ENSACAG00000002026  | 9576 GRIK1    |
| ENSACAG00000001106  | 9577 OSCP1    |
| ENSACAG000000015562 | 9578 AMH      |
| ENSACAG000000013803 | 9579 ZNF423   |
| ENSACAG000000021945 | 9580          |
| ENSACAG000000004158 | 9581          |
| ENSACAG000000014409 | 9582 RAMP2    |
| ENSACAG000000001329 | 9583 TOP1MT   |
| ENSACAG000000009834 | 9584 ADAMTS17 |
| ENSACAG000000000512 | 9585 ANPEP    |
| ENSACAG000000011063 | 9586 FAM184B  |
| ENSACAG000000005958 | 9587 VASP     |
| ENSACAG000000003034 | 9588 RAB2B    |
| ENSACAG000000001190 | 9589 POLG     |
| ENSACAG000000003716 | 9590 SPSB3    |
| ENSACAG000000003024 | 9591 OLFM3    |
| ENSACAG000000001651 | 9592 TRPV3    |
| ENSACAG000000026324 | 9593          |
| ENSACAG000000010902 | 9594 OTOP1    |
| ENSACAG000000008971 | 9595 PRPSAP2  |
| ENSACAG000000010944 | 9596 SLC6A15  |
| ENSACAG000000014363 | 9597 RDH10    |
| ENSACAG000000009098 | 9598 APBA3    |
| ENSACAG000000008422 | 9599 PSMF1    |
| ENSACAG000000012608 | 9600 VSTM2A   |
| ENSACAG000000008026 | 9601 NPHP4    |
| ENSACAG000000013401 | 9602 CDT1     |
| ENSACAG000000012896 | 9603 DGKB     |
| ENSACAG000000014504 | 9604 ANKRD60  |
| ENSACAG000000016352 | 9605 TFAP4    |
| ENSACAG000000006942 | 9606 EPB41L4B |
| ENSACAG000000002730 | 9607 PGC      |
| ENSACAG000000001091 | 9608 ANKS3    |
| ENSACAG000000024136 | 9609          |
| ENSACAG000000016234 | 9610 SULF2    |
| ENSACAG000000029071 | 9611 FAM212A  |
| ENSACAG000000009601 | 9612 SRD5A3   |
| ENSACAG000000008172 | 9613 HADH     |
| ENSACAG000000003457 | 9614          |
| ENSACAG000000005442 | 9615 LCA5L    |
| ENSACAG000000007252 | 9616 CTTNBP2  |

|                    |                   |
|--------------------|-------------------|
| ENSACAG00000017287 | 9617 RWDD2A       |
| ENSACAG00000015744 | 9618 HAUS2        |
| ENSACAG00000002816 | 9619              |
| ENSACAG00000002862 | 9620 KIF5C        |
| ENSACAG00000012324 | 9621 ANKRD13B     |
| ENSACAG00000011056 | 9622 GUCY1A2      |
| ENSACAG00000024186 | 9623 IGFBP6       |
| ENSACAG00000019634 | 9624 snosnR60_Z15 |
| ENSACAG00000001826 | 9625 PHYHIPL      |
| ENSACAG00000013785 | 9626 ZFAND1       |
| ENSACAG00000002010 | 9627 PGAM2        |
| ENSACAG00000008417 | 9628 BCDIN3D      |
| ENSACAG00000003693 | 9629 ATP5SL       |
| ENSACAG00000026065 | 9630 PTGER2       |
| ENSACAG00000005382 | 9631 GALNTL6      |
| ENSACAG00000009392 | 9632 ERP29        |
| ENSACAG00000009267 | 9633 F13B         |
| ENSACAG00000003600 | 9634              |
| ENSACAG00000014927 | 9635 TTC19        |
| ENSACAG00000000932 | 9636 CEP41        |
| ENSACAG00000020004 | 9637 Y_RNA        |
| ENSACAG00000004959 | 9638 SGPP2        |
| ENSACAG00000004768 | 9639 KLHL24       |
| ENSACAG00000025275 | 9640 PNPLA7       |
| ENSACAG00000014134 | 9641 TEX9         |
| ENSACAG00000029272 | 9642              |
| ENSACAG00000025781 | 9643              |
| ENSACAG00000000350 | 9644 XIRP2        |
| ENSACAG00000001752 | 9645 CCDC78       |
| ENSACAG00000017695 | 9646 DAGLA        |
| ENSACAG00000024561 | 9647              |
| ENSACAG00000017181 | 9648 MTF1         |
| ENSACAG00000016188 | 9649 MPST         |
| ENSACAG00000014118 | 9650 TYRO3        |
| ENSACAG00000013639 | 9651 ZC4H2        |
| ENSACAG00000015481 | 9652 USB1         |
| ENSACAG00000002914 | 9653 EVA1C        |
| ENSACAG00000009511 | 9654 RIMS2        |
| ENSACAG00000029135 | 9655              |
| ENSACAG00000001442 | 9656 NTNG1        |
| ENSACAG00000001348 | 9657 SPOCK2       |
| ENSACAG00000013264 | 9658 PMS2         |

|                    |               |
|--------------------|---------------|
| ENSACAG00000001134 | 9659 SLC35F3  |
| ENSACAG00000007858 | 9660          |
| ENSACAG00000004656 | 9661 C1orf146 |
| ENSACAG00000017049 | 9662 CCDC173  |
| ENSACAG00000012972 | 9663 PREB     |
| ENSACAG00000025046 | 9664          |
| ENSACAG00000014357 | 9665 NKD1     |
| ENSACAG00000007939 | 9666 TRIM36   |
| ENSACAG00000014558 | 9667 CST6     |
| ENSACAG00000018164 | 9668 5S_rRNA  |
| ENSACAG00000002428 | 9669          |
| ENSACAG00000016864 | 9670 CTSO     |
| ENSACAG00000006767 | 9671 VEPH1    |
| ENSACAG00000017559 | 9672          |
| ENSACAG00000006895 | 9673          |
| ENSACAG00000012683 | 9674 SLX4     |
| ENSACAG00000026926 | 9675          |
| ENSACAG00000028962 | 9676          |
| ENSACAG00000003678 | 9677 SHKBP1   |
| ENSACAG00000014896 | 9678 GYLTL1B  |
| ENSACAG00000008736 | 9679 TMCO4    |
| ENSACAG00000009746 | 9680 ADCK5    |
| ENSACAG00000002005 | 9681 GRID1    |
| ENSACAG00000002310 | 9682 GDPD5    |
| ENSACAG00000004848 | 9683 CITED2   |
| ENSACAG00000015526 | 9684 SLC3A1   |
| ENSACAG00000015179 | 9685 DYNC2LI1 |
| ENSACAG00000007041 | 9686 TXNDC16  |
| ENSACAG00000028708 | 9687 ATG10    |
| ENSACAG00000009549 | 9688 TRAFD1   |
| ENSACAG00000000542 | 9689          |
| ENSACAG00000008437 | 9690 NPNT     |
| ENSACAG00000012900 | 9691          |
| ENSACAG00000003392 | 9692 MTCL1    |
| ENSACAG00000001035 | 9693 SLC7A7   |
| ENSACAG00000012461 | 9694 FBXW12   |
| ENSACAG00000029195 | 9695          |
| ENSACAG00000009295 | 9696          |
| ENSACAG00000013354 | 9697 LBP      |
| ENSACAG00000014787 | 9698 NCDN     |
| ENSACAG00000027129 | 9699          |
| ENSACAG00000000793 | 9700 C14orf37 |

|                     |                |
|---------------------|----------------|
| ENSACAG00000028557  | 9701           |
| ENSACAG00000010576  | 9702 BLZF1     |
| ENSACAG00000002017  | 9703 KCNK5     |
| ENSACAG000000011865 | 9704 NSUN7     |
| ENSACAG00000006108  | 9705 PHOSPHO1  |
| ENSACAG00000004963  | 9706 DOCK4     |
| ENSACAG000000022734 | 9707           |
| ENSACAG00000003509  | 9708 PKP1      |
| ENSACAG000000025433 | 9709           |
| ENSACAG000000003209 | 9710 SNTB2     |
| ENSACAG000000017526 | 9711 BET1L     |
| ENSACAG000000009666 | 9712 DPYS      |
| ENSACAG000000000515 | 9713 POLRMT    |
| ENSACAG000000009319 | 9714           |
| ENSACAG000000002510 | 9715 MYBPC3    |
| ENSACAG000000024664 | 9716           |
| ENSACAG000000015311 | 9717 NELL1     |
| ENSACAG000000000126 | 9718 LCMT2     |
| ENSACAG000000025734 | 9719 C10orf71  |
| ENSACAG000000011683 | 9720 PSTPIP1   |
| ENSACAG000000026806 | 9721           |
| ENSACAG000000003622 | 9722           |
| ENSACAG000000026611 | 9723           |
| ENSACAG000000012226 | 9724 IGFBPL1   |
| ENSACAG000000002145 | 9725 EVA1B     |
| ENSACAG000000009413 | 9726 RAB11FIP4 |
| ENSACAG000000014509 | 9727 TP53I11   |
| ENSACAG000000017096 | 9728           |
| ENSACAG000000014327 | 9729           |
| ENSACAG000000004652 | 9730           |
| ENSACAG000000009801 | 9731           |
| ENSACAG000000014113 | 9732 DRC1      |
| ENSACAG000000002529 | 9733 SDK1      |
| ENSACAG000000016157 | 9734 FAM161B   |
| ENSACAG000000015725 | 9735 LRRC34    |
| ENSACAG000000010066 | 9736 MAPK4     |
| ENSACAG000000006678 | 9737 VAMP1     |
| ENSACAG000000015542 | 9738 AFAP1L1   |
| ENSACAG000000027521 | 9739 SLIT3     |
| ENSACAG000000004482 | 9740 TMEM88    |
| ENSACAG000000000445 | 9741 FBXO42    |
| ENSACAG000000002116 | 9742 CCDC113   |



|                    |              |
|--------------------|--------------|
| ENSACAG00000000911 | 9743 MUSK    |
| ENSACAG00000012841 | 9744 PROK1   |
| ENSACAG00000000927 | 9745 GPS2    |
| ENSACAG00000022032 | 9746         |
| ENSACAG00000014284 | 9747 CDK18   |
| ENSACAG00000029426 | 9748         |
| ENSACAG00000004194 | 9749 DIS3L   |
| ENSACAG00000004868 | 9750 GMIP    |
| ENSACAG00000028083 | 9751         |
| ENSACAG00000002736 | 9752 RELT    |
| ENSACAG00000014090 | 9753 FBXO47  |
| ENSACAG00000004459 | 9754 CYB5D1  |
| ENSACAG00000015701 | 9755 ABCB9   |
| ENSACAG00000013289 | 9756 GALNS   |
| ENSACAG00000001513 | 9757 LRIG3   |
| ENSACAG00000001527 | 9758         |
| ENSACAG00000024338 | 9759         |
| ENSACAG00000012668 | 9760 KCNE5   |
| ENSACAG00000002614 | 9761 MEGF10  |
| ENSACAG00000004082 | 9762 PHF19   |
| ENSACAG00000003482 | 9763 TMTC4   |
| ENSACAG00000004048 | 9764 FOXS1   |
| ENSACAG00000001476 | 9765 LRP10   |
| ENSACAG00000002040 | 9766 FAAH    |
| ENSACAG00000009778 | 9767 GID4    |
| ENSACAG00000002002 | 9768 ASCC2   |
| ENSACAG00000015428 | 9769 ANKRD54 |
| ENSACAG00000012181 | 9770 COL4A6  |
| ENSACAG00000009682 | 9771         |
| ENSACAG00000004538 | 9772 CREB3L1 |
| ENSACAG00000024956 | 9773         |
| ENSACAG00000004900 | 9774 SLC8B1  |
| ENSACAG00000003391 | 9775         |
| ENSACAG00000024665 | 9776         |
| ENSACAG00000005552 | 9777 ATP2A1  |
| ENSACAG00000011477 | 9778 FSTL4   |
| ENSACAG00000016631 | 9779 EYA2    |
| ENSACAG00000007478 | 9780 SMARCB1 |
| ENSACAG00000016656 | 9781         |
| ENSACAG00000028022 | 9782         |
| ENSACAG00000011099 | 9783 PDZD7   |
| ENSACAG00000014649 | 9784 MCF2    |

|                    |              |
|--------------------|--------------|
| ENSACAG00000003661 | 9785 QPCTL   |
| ENSACAG00000013755 | 9786 KLHL7   |
| ENSACAG00000007778 | 9787 EHHADH  |
| ENSACAG00000003274 | 9788 RPGRIP1 |
| ENSACAG00000008118 | 9789 KCNT2   |
| ENSACAG00000014099 | 9790 FUT4    |
| ENSACAG00000009099 | 9791 IGSF9   |
| ENSACAG00000003446 | 9792 GIGYF1  |
| ENSACAG00000017521 | 9793 ELAVL2  |
| ENSACAG00000008962 | 9794 RING1   |
| ENSACAG00000027789 | 9795         |
| ENSACAG00000006584 | 9796 ARHGAP9 |
| ENSACAG00000008765 | 9797 SIM2    |
| ENSACAG00000004442 | 9798         |
| ENSACAG00000028969 | 9799         |
| ENSACAG00000008115 | 9800 DHX38   |
| ENSACAG00000008076 | 9801 ATG12   |
| ENSACAG00000002127 | 9802 KCTD1   |
| ENSACAG00000008735 | 9803 NAT6    |
| ENSACAG00000015792 | 9804 FLT4    |
| ENSACAG00000004320 | 9805 GFOD1   |
| ENSACAG00000003201 | 9806 PDE1A   |
| ENSACAG00000026038 | 9807         |
| ENSACAG00000000420 | 9808         |
| ENSACAG00000010547 | 9809         |
| ENSACAG00000007428 | 9810 STX1B   |
| ENSACAG00000005496 | 9811 PRDM1   |
| ENSACAG00000015934 | 9812 TRIM2   |
| ENSACAG00000011087 | 9813 LRRIQ1  |
| ENSACAG00000014568 | 9814 LHX9    |
| ENSACAG00000024084 | 9815 CADM2   |
| ENSACAG00000006111 | 9816         |
| ENSACAG00000017581 | 9817 SUGCT   |
| ENSACAG00000011114 | 9818 COX18   |
| ENSACAG00000023013 | 9819         |
| ENSACAG00000012353 | 9820         |
| ENSACAG00000008500 | 9821         |
| ENSACAG00000008413 | 9822         |
| ENSACAG00000003072 | 9823 FRZB    |
| ENSACAG00000009095 | 9824 AASDH   |
| ENSACAG00000027701 | 9825         |
| ENSACAG00000010017 | 9826         |

|                    |              |
|--------------------|--------------|
| ENSACAG00000010346 | 9827 EYA4    |
| ENSACAG00000011900 | 9828         |
| ENSACAG00000012533 | 9829         |
| ENSACAG00000024458 | 9830         |
| ENSACAG00000011013 | 9831 KIF26A  |
| ENSACAG00000012310 | 9832 HS3ST5  |
| ENSACAG00000028425 | 9833 AGL4    |
| ENSACAG00000028823 | 9834         |
| ENSACAG00000008713 | 9835 CLCN6   |
| ENSACAG00000011946 | 9836         |
| ENSACAG00000012063 | 9837 VANGL2  |
| ENSACAG00000005003 | 9838 RGS8    |
| ENSACAG00000013309 | 9839         |
| ENSACAG00000013703 | 9840 PROCA1  |
| ENSACAG00000007902 | 9841 ADGRB3  |
| ENSACAG00000009302 | 9842 USP20   |
| ENSACAG00000023044 | 9843 UBE3D   |
| ENSACAG00000014157 | 9844         |
| ENSACAG00000004843 | 9845 COL6A2  |
| ENSACAG00000015990 | 9846 ADAM22  |
| ENSACAG00000013569 | 9847         |
| ENSACAG00000008589 | 9848 ZDHHC24 |
| ENSACAG00000012247 | 9849 CECR1   |
| ENSACAG00000023940 | 9850         |
| ENSACAG00000015892 | 9851         |
| ENSACAG00000011380 | 9852 TYW3    |
| ENSACAG00000011820 | 9853         |
| ENSACAG00000013641 | 9854         |
| ENSACAG00000002495 | 9855 HINFP   |
| ENSACAG00000015959 | 9856         |
| ENSACAG00000017830 | 9857         |
| ENSACAG00000015612 | 9858 DPAGT1  |
| ENSACAG00000004749 | 9859 MOGAT1  |
| ENSACAG00000012098 | 9860 NFKBIZ  |
| ENSACAG00000000476 | 9861 MEIS2   |
| ENSACAG00000005286 | 9862 FBXO25  |
| ENSACAG00000006625 | 9863 WDR90   |
| ENSACAG00000012357 | 9864 APOM    |
| ENSACAG00000014634 | 9865 CHST1   |
| ENSACAG00000009593 | 9866         |
| ENSACAG00000022448 | 9867 SLC19A3 |
| ENSACAG00000008982 | 9868 PPAT    |

|                    |                |
|--------------------|----------------|
| ENSACAG00000011589 | 9869           |
| ENSACAG00000007629 | 9870           |
| ENSACAG00000026047 | 9871           |
| ENSACAG00000012644 | 9872 SLC9A6    |
| ENSACAG00000022750 | 9873           |
| ENSACAG00000016735 | 9874 MBTPS2    |
| ENSACAG00000006269 | 9875 EFS       |
| ENSACAG00000011925 | 9876 BBS12     |
| ENSACAG00000017964 | 9877 NAGLU     |
| ENSACAG00000004647 | 9878           |
| ENSACAG00000024082 | 9879           |
| ENSACAG00000013210 | 9880 GLB1L     |
| ENSACAG00000002847 | 9881 NR1D1     |
| ENSACAG00000015799 | 9882 SHC1      |
| ENSACAG00000025292 | 9883           |
| ENSACAG00000016244 | 9884           |
| ENSACAG00000012859 | 9885           |
| ENSACAG00000010020 | 9886           |
| ENSACAG00000015663 | 9887 CTSH      |
| ENSACAG00000011795 | 9888 MAPK10    |
| ENSACAG00000019956 | 9889 5S_rRNA   |
| ENSACAG00000028421 | 9890           |
| ENSACAG00000007944 | 9891 STX11     |
| ENSACAG00000000154 | 9892 CABLES1   |
| ENSACAG00000018975 | 9893 7SK       |
| ENSACAG00000007975 | 9894           |
| ENSACAG00000008635 | 9895           |
| ENSACAG00000001732 | 9896 TLR3      |
| ENSACAG00000012631 | 9897 PLXNC1    |
| ENSACAG00000014499 | 9898 C20orf85  |
| ENSACAG00000023076 | 9899           |
| ENSACAG00000001965 | 9900           |
| ENSACAG00000004726 | 9901 ELK1      |
| ENSACAG00000013694 | 9902           |
| ENSACAG00000004505 | 9903 MED9      |
| ENSACAG00000028855 | 9904           |
| ENSACAG00000005589 | 9905 DKK1      |
| ENSACAG00000016619 | 9906 SEMA4D    |
| ENSACAG00000000782 | 9907 VAV3      |
| ENSACAG00000001093 | 9908 CALCRL    |
| ENSACAG00000016478 | 9909 KIAA1324L |
| ENSACAG00000013099 | 9910           |

|                    |                  |
|--------------------|------------------|
| ENSACAG00000006808 | 9911             |
| ENSACAG00000009184 | 9912 SLC24A4     |
| ENSACAG00000028762 | 9913 PDGFB       |
| ENSACAG00000025537 | 9914             |
| ENSACAG00000008231 | 9915 CARNS1      |
| ENSACAG00000005473 | 9916             |
| ENSACAG00000008683 | 9917 TICAM1      |
| ENSACAG00000011287 | 9918             |
| ENSACAG00000013236 | 9919 CFAP57      |
| ENSACAG00000013821 | 9920 ZBTB17      |
| ENSACAG00000014921 | 9921 CDH8        |
| ENSACAG00000027001 | 9922             |
| ENSACAG00000007017 | 9923 C4orf19     |
| ENSACAG00000009128 | 9924 TM2D2       |
| ENSACAG00000014830 | 9925 C1orf228    |
| ENSACAG00000004284 | 9926             |
| ENSACAG00000001057 | 9927             |
| ENSACAG00000027441 | 9928             |
| ENSACAG00000008703 | 9929 CTSS        |
| ENSACAG00000015942 | 9930 CBR4        |
| ENSACAG00000025540 | 9931 FGF18       |
| ENSACAG00000011648 | 9932 WISP1       |
| ENSACAG00000027605 | 9933             |
| ENSACAG00000024093 | 9934             |
| ENSACAG00000007377 | 9935 UNC13D      |
| ENSACAG00000013316 | 9936 THSD7A      |
| ENSACAG00000009357 | 9937 RASGRP3     |
| ENSACAG00000000222 | 9938 CPXM1       |
| ENSACAG00000000731 | 9939 NTPCR       |
| ENSACAG00000010660 | 9940 LRRTM3      |
| ENSACAG00000009308 | 9941 MICALL2     |
| ENSACAG00000019822 | 9942 aca-mir-15b |
| ENSACAG00000003095 | 9943 MBOAT1      |
| ENSACAG00000017482 | 9944             |
| ENSACAG00000014859 | 9945             |
| ENSACAG00000012834 | 9946             |
| ENSACAG00000002560 | 9947             |
| ENSACAG00000003018 | 9948 TMUB1       |
| ENSACAG00000011892 | 9949 SEPT6       |
| ENSACAG00000000657 | 9950 KLHDC1      |
| ENSACAG00000014050 | 9951 SATL1       |
| ENSACAG00000002364 | 9952 TPPP3       |

|                    |              |
|--------------------|--------------|
| ENSACAG00000013422 | 9953 MYOZ2   |
| ENSACAG00000002685 | 9954 IQCG    |
| ENSACAG00000000031 | 9955 NINJ2   |
| ENSACAG00000007884 | 9956         |
| ENSACAG00000014894 | 9957 VPS13D  |
| ENSACAG00000008278 | 9958 CCDC65  |
| ENSACAG00000014451 | 9959 ANKRD6  |
| ENSACAG00000014913 | 9960 TCAIM   |
| ENSACAG00000011841 | 9961         |
| ENSACAG00000000808 | 9962 MFSD6   |
| ENSACAG00000028369 | 9963         |
| ENSACAG00000025778 | 9964         |
| ENSACAG00000009469 | 9965         |
| ENSACAG00000000711 | 9966 ZZEF1   |
| ENSACAG00000014074 | 9967 CTSA    |
| ENSACAG00000011041 | 9968 PPM1E   |
| ENSACAG00000010313 | 9969 SLC2A12 |
| ENSACAG00000009070 | 9970         |
| ENSACAG00000014870 | 9971 CADM3   |
| ENSACAG00000006399 | 9972         |
| ENSACAG00000004354 | 9973         |
| ENSACAG00000000240 | 9974 FLRT1   |
| ENSACAG00000002728 | 9975 DISC1   |
| ENSACAG00000029036 | 9976 MAP2K6  |
| ENSACAG00000004807 | 9977 GRAMD1B |
| ENSACAG00000010718 | 9978 ELL     |
| ENSACAG00000012529 | 9979 CHAC2   |
| ENSACAG00000028637 | 9980         |
| ENSACAG00000009092 | 9981 USP28   |
| ENSACAG00000012619 | 9982 HSPG2   |
| ENSACAG00000004840 | 9983 ARHGEF4 |
| ENSACAG00000009938 | 9984         |
| ENSACAG00000002666 | 9985         |
| ENSACAG00000004809 | 9986 ADORA1  |
| ENSACAG00000006768 | 9987 GABRB1  |
| ENSACAG00000002300 | 9988 NLRX1   |
| ENSACAG00000028828 | 9989         |
| ENSACAG00000017362 | 9990 CA10    |
| ENSACAG00000000701 | 9991         |
| ENSACAG00000012540 | 9992 BBS7    |
| ENSACAG00000024656 | 9993 ULK4    |
| ENSACAG00000026711 | 9994 TSC22D3 |

|                    |                |
|--------------------|----------------|
| ENSACAG00000004777 | 9995 IQCB1     |
| ENSACAG00000023009 | 9996           |
| ENSACAG00000002418 | 9997 FAM98C    |
| ENSACAG00000010921 | 9998 NR1I2     |
| ENSACAG00000004525 | 9999 PEMT      |
| ENSACAG00000005927 | 10000 C1orf74  |
| ENSACAG00000028428 | 10001 RSPO3    |
| ENSACAG00000010544 | 10002 TMEM64   |
| ENSACAG00000017883 | 10003 ASXL3    |
| ENSACAG00000009120 | 10004 CLIP4    |
| ENSACAG00000020355 | 10005          |
| ENSACAG00000011826 | 10006 GALNT6   |
| ENSACAG00000008378 | 10007 PLXNB3   |
| ENSACAG00000008809 | 10008          |
| ENSACAG00000002259 | 10009 RSPH14   |
| ENSACAG00000009174 | 10010 TOP3A    |
| ENSACAG00000014641 | 10011 ALDH1A2  |
| ENSACAG00000013849 | 10012 LDLRAP1  |
| ENSACAG00000007222 | 10013 EPHA1    |
| ENSACAG00000002329 | 10014 GPC1     |
| ENSACAG00000026995 | 10015          |
| ENSACAG00000006007 | 10016 EEF1A2   |
| ENSACAG00000025658 | 10017 UCK1     |
| ENSACAG00000009708 | 10018 PARP9    |
| ENSACAG00000026049 | 10019          |
| ENSACAG00000014281 | 10020 DCHS1    |
| ENSACAG00000018064 | 10021 5S_rRNA  |
| ENSACAG00000015091 | 10022 FAM101A  |
| ENSACAG00000012893 | 10023 ATP6V1C2 |
| ENSACAG00000013826 | 10024 SYT1     |
| ENSACAG00000016293 | 10025 BBOF1    |
| ENSACAG00000028734 | 10026          |
| ENSACAG00000003435 | 10027 TSPAN2   |
| ENSACAG00000009556 | 10028 ATP2B2   |
| ENSACAG00000009897 | 10029 ARHGAP28 |
| ENSACAG00000000678 | 10030          |
| ENSACAG00000018561 | 10031 U5       |
| ENSACAG00000006823 | 10032 PLSCR4   |
| ENSACAG00000018152 | 10033          |
| ENSACAG00000006906 | 10034 OSBPL7   |
| ENSACAG00000010623 | 10035 ALPK1    |
| ENSACAG00000002686 | 10036 FAM120B  |

|                    |                |
|--------------------|----------------|
| ENSACAG00000027177 | 10037          |
| ENSACAG00000013708 | 10038 GGA2     |
| ENSACAG00000001905 | 10039 CPAMD8   |
| ENSACAG00000028305 | 10040          |
| ENSACAG00000028482 | 10041 SLC25A40 |
| ENSACAG00000008732 | 10042          |
| ENSACAG00000004298 | 10043          |
| ENSACAG00000029579 | 10044          |
| ENSACAG00000025671 | 10045          |
| ENSACAG00000024540 | 10046          |
| ENSACAG00000025832 | 10047          |
| ENSACAG00000008300 | 10048 GPX7     |
| ENSACAG00000012232 | 10049 SYT3     |
| ENSACAG00000003702 | 10050 ENTPD7   |
| ENSACAG00000011297 | 10051 SYNGAP1  |
| ENSACAG00000015635 | 10052 UNC13B   |
| ENSACAG00000016680 | 10053 C1QL3    |
| ENSACAG00000017699 | 10054 ADAMTSL1 |
| ENSACAG00000009525 | 10055 PLEKHG4B |
| ENSACAG00000007307 | 10056 KIAA0895 |
| ENSACAG00000012083 | 10057 SYNGR3   |
| ENSACAG00000002645 | 10058 THAP8    |
| ENSACAG00000028627 | 10059 C16orf59 |
| ENSACAG00000002739 | 10060 FZD4     |
| ENSACAG00000003896 | 10061          |
| ENSACAG00000005887 | 10062 ASB5     |
| ENSACAG00000001243 | 10063 SYT17    |
| ENSACAG00000015385 | 10064 HERC1    |
| ENSACAG00000014745 | 10065 TMOD4    |
| ENSACAG00000028353 | 10066          |
| ENSACAG00000011205 | 10067 HCN1     |
| ENSACAG00000013782 | 10068 PIAS3    |
| ENSACAG00000008335 | 10069 AGBL5    |
| ENSACAG00000014820 | 10070 CNR1     |
| ENSACAG00000017251 | 10071 TCF19    |
| ENSACAG00000005267 | 10072          |
| ENSACAG00000012903 | 10073          |
| ENSACAG00000025393 | 10074          |
| ENSACAG00000001906 | 10075 CREBZF   |
| ENSACAG00000002940 | 10076 NR1H3    |
| ENSACAG00000013918 | 10077 VWA3A    |
| ENSACAG00000000066 | 10078 IGSF22   |



|                    |                |
|--------------------|----------------|
| ENSACAG00000027955 | 10079          |
| ENSACAG00000007999 | 10080 ZNF821   |
| ENSACAG00000003830 | 10081 IRS1     |
| ENSACAG00000010560 | 10082 CCDC181  |
| ENSACAG00000028824 | 10083          |
| ENSACAG00000018788 | 10084 5S_rRNA  |
| ENSACAG00000016017 | 10085 CDH12    |
| ENSACAG00000004735 | 10086 COL6A1   |
| ENSACAG00000006165 | 10087          |
| ENSACAG00000014020 | 10088 PDK4     |
| ENSACAG00000005897 | 10089          |
| ENSACAG00000002294 | 10090          |
| ENSACAG00000005959 | 10091          |
| ENSACAG00000010257 | 10092          |
| ENSACAG00000002538 | 10093          |
| ENSACAG00000026597 | 10094          |
| ENSACAG00000015944 | 10095 COX6B2   |
| ENSACAG00000026013 | 10096          |
| ENSACAG00000004166 | 10097 DNMBP    |
| ENSACAG00000029066 | 10098          |
| ENSACAG00000004232 | 10099 FAM69A   |
| ENSACAG00000024776 | 10100 PSMB9    |
| ENSACAG00000012820 | 10101          |
| ENSACAG00000005957 | 10102 NR2E1    |
| ENSACAG00000010622 | 10103 XRCC2    |
| ENSACAG00000018007 | 10104 ZBTB7C   |
| ENSACAG00000011489 | 10105 TMEM184A |
| ENSACAG00000016003 | 10106 GEMIN4   |
| ENSACAG00000003529 | 10107          |
| ENSACAG00000013029 | 10108 WDR63    |
| ENSACAG00000009030 | 10109          |
| ENSACAG00000005613 | 10110 CNTROB   |
| ENSACAG00000015499 | 10111          |
| ENSACAG00000001546 | 10112 RHPN1    |
| ENSACAG00000006093 | 10113          |
| ENSACAG00000029131 | 10114 PARM1    |
| ENSACAG00000027091 | 10115          |
| ENSACAG00000026265 | 10116 POPDC3   |
| ENSACAG00000001958 | 10117 C1QTNF4  |
| ENSACAG00000014151 | 10118 MNS1     |
| ENSACAG00000017645 | 10119 SMPDL3B  |
| ENSACAG00000027740 | 10120 IRGM     |

|                    |                |
|--------------------|----------------|
| ENSACAG00000020303 | 10121 5S_rRNA  |
| ENSACAG00000010707 | 10122 DPP6     |
| ENSACAG00000023064 | 10123          |
| ENSACAG00000010369 | 10124          |
| ENSACAG00000016597 | 10125 KSR2     |
| ENSACAG00000002067 | 10126          |
| ENSACAG00000010485 | 10127 C2orf40  |
| ENSACAG00000016424 | 10128 CGRRF1   |
| ENSACAG00000013841 | 10129 PCDH10   |
| ENSACAG00000020636 | 10130 5S_rRNA  |
| ENSACAG00000017885 | 10131 NOL4     |
| ENSACAG00000002571 | 10132 PLEKHG4  |
| ENSACAG00000015878 | 10133 DTWD1    |
| ENSACAG00000000308 | 10134 IDUA     |
| ENSACAG00000008829 | 10135 NF2      |
| ENSACAG00000003631 | 10136 ZBTB46   |
| ENSACAG00000001730 | 10137 EPS15L1  |
| ENSACAG00000009628 | 10138 OPHN1    |
| ENSACAG00000005446 | 10139 TMPRSS2  |
| ENSACAG00000003743 | 10140 TMEM255A |
| ENSACAG00000013050 | 10141 ARHGAP27 |
| ENSACAG00000000310 | 10142          |
| ENSACAG00000015863 | 10143 SLC41A2  |
| ENSACAG00000011317 | 10144 NKIRAS1  |
| ENSACAG00000009823 | 10145 JAGN1    |
| ENSACAG00000029160 | 10146          |
| ENSACAG00000025741 | 10147          |
| ENSACAG00000009457 | 10148          |
| ENSACAG00000013943 | 10149          |
| ENSACAG00000023286 | 10150 SIX1     |
| ENSACAG00000016908 | 10151 COLEC11  |
| ENSACAG00000011350 | 10152 HGD      |
| ENSACAG00000000077 | 10153 SLC22A18 |
| ENSACAG00000011044 | 10154          |
| ENSACAG00000008000 | 10155 EPHB6    |
| ENSACAG00000002810 | 10156 ROPN1L   |
| ENSACAG00000012806 | 10157 TTC8     |
| ENSACAG00000016980 | 10158          |
| ENSACAG00000014550 | 10159 PPFIA2   |
| ENSACAG00000010631 | 10160          |
| ENSACAG00000028584 | 10161 MSRB2    |
| ENSACAG00000010585 | 10162 BAZ2B    |

|                    |                |
|--------------------|----------------|
| ENSACAG00000027133 | 10163          |
| ENSACAG00000013915 | 10164 EPCAM    |
| ENSACAG00000012633 | 10165 CDR2     |
| ENSACAG00000002204 | 10166 AP4B1    |
| ENSACAG00000006265 | 10167 CCDC170  |
| ENSACAG00000014718 | 10168 KLHL25   |
| ENSACAG00000020945 | 10169 TMEM139  |
| ENSACAG00000004729 | 10170 ZBTB34   |
| ENSACAG00000014128 | 10171 FBXL15   |
| ENSACAG00000016906 | 10172 LENG9    |
| ENSACAG00000028409 | 10173          |
| ENSACAG00000007393 | 10174 CDKN2C   |
| ENSACAG00000012780 | 10175 AMN1     |
| ENSACAG00000015636 | 10176 ISOC2    |
| ENSACAG00000017925 | 10177 WNT2B    |
| ENSACAG00000003592 | 10178 MMAA     |
| ENSACAG00000004303 | 10179 ANKRD53  |
| ENSACAG00000010381 | 10180 KALRN    |
| ENSACAG00000012297 | 10181 CECR2    |
| ENSACAG00000014325 | 10182 SETX     |
| ENSACAG00000004555 | 10183 CNNM2    |
| ENSACAG00000024039 | 10184          |
| ENSACAG00000009677 | 10185 SLC46A3  |
| ENSACAG00000009754 | 10186 ANXA4    |
| ENSACAG00000014359 | 10187          |
| ENSACAG00000004955 | 10188          |
| ENSACAG00000022789 | 10189 ZNF668   |
| ENSACAG00000010315 | 10190 HOXA10   |
| ENSACAG00000029249 | 10191          |
| ENSACAG00000026656 | 10192 5S_rRNA  |
| ENSACAG00000029097 | 10193          |
| ENSACAG00000007602 | 10194 PLEKHA6  |
| ENSACAG00000012713 | 10195 NIPA1    |
| ENSACAG00000020119 | 10196 SNORA47  |
| ENSACAG00000004001 | 10197 CNOT8    |
| ENSACAG00000017991 | 10198          |
| ENSACAG00000027902 | 10199          |
| ENSACAG00000014467 | 10200 TLE3     |
| ENSACAG00000029386 | 10201 C9orf142 |
| ENSACAG00000026246 | 10202          |
| ENSACAG00000012462 | 10203 AGPAT1   |
| ENSACAG00000005201 | 10204 DLEC1    |

|                    |                |
|--------------------|----------------|
| ENSACAG00000006514 | 10205          |
| ENSACAG00000010025 | 10206 MALT1    |
| ENSACAG00000004706 | 10207 C3orf30  |
| ENSACAG00000011982 | 10208 EPS8L3   |
| ENSACAG00000022006 | 10209          |
| ENSACAG00000002801 | 10210 NEDD4    |
| ENSACAG00000005987 | 10211          |
| ENSACAG00000011330 | 10212 RETSAT   |
| ENSACAG00000003511 | 10213 RBP1     |
| ENSACAG00000004159 | 10214 DPP3     |
| ENSACAG00000012789 | 10215 PSTPIP2  |
| ENSACAG00000000033 | 10216 CCDC77   |
| ENSACAG00000010587 | 10217 UBAP2L   |
| ENSACAG00000014332 | 10218 OSGEPL1  |
| ENSACAG00000016116 | 10219 C19orf25 |
| ENSACAG00000025187 | 10220 C19orf52 |
| ENSACAG00000000200 | 10221 PANX3    |
| ENSACAG00000004313 | 10222 CCDC169  |
| ENSACAG00000021625 | 10223 5S_rRNA  |
| ENSACAG00000013722 | 10224 SLC25A34 |
| ENSACAG00000017342 | 10225 C1orf216 |
| ENSACAG00000006541 | 10226          |
| ENSACAG00000017661 | 10227          |
| ENSACAG00000016844 | 10228 ACYP1    |
| ENSACAG00000000106 | 10229 CACNA1E  |
| ENSACAG00000014231 | 10230          |
| ENSACAG00000009861 | 10231 MYB      |
| ENSACAG00000023736 | 10232          |
| ENSACAG00000007541 | 10233 KCND1    |
| ENSACAG00000004930 | 10234 PLBD2    |
| ENSACAG00000002607 | 10235          |
| ENSACAG00000000037 | 10236 IQSEC3   |
| ENSACAG00000000702 | 10237          |
| ENSACAG00000003719 | 10238 CSMD3    |
| ENSACAG00000011992 | 10239 SETDB1   |
| ENSACAG00000006595 | 10240          |
| ENSACAG00000024559 | 10241          |
| ENSACAG00000012517 | 10242 NR1H2    |
| ENSACAG00000029532 | 10243 MKRN2OS  |
| ENSACAG00000013691 | 10244          |
| ENSACAG00000016126 | 10245 SPOCK3   |
| ENSACAG00000003329 | 10246 ITGBL1   |

|                    |                 |
|--------------------|-----------------|
| ENSACAG00000028372 | 10247 SYNGR4    |
| ENSACAG00000016055 | 10248 FGF19     |
| ENSACAG00000004002 | 10249           |
| ENSACAG00000001181 | 10250 SREBF1    |
| ENSACAG00000000225 | 10251 BRF2      |
| ENSACAG00000012750 | 10252           |
| ENSACAG00000012062 | 10253 AP4M1     |
| ENSACAG00000004994 | 10254           |
| ENSACAG00000007921 | 10255 ADCY1     |
| ENSACAG00000008136 | 10256 TCERG1L   |
| ENSACAG00000015969 | 10257 CASP9     |
| ENSACAG00000007962 | 10258 TMEM35    |
| ENSACAG00000004532 | 10259 GFRA4     |
| ENSACAG00000026606 | 10260           |
| ENSACAG00000001095 | 10261 KIAA0895L |
| ENSACAG00000005702 | 10262           |
| ENSACAG00000004241 | 10263 PHC2      |
| ENSACAG00000005741 | 10264 CRHR2     |
| ENSACAG00000007495 | 10265 PCIF1     |
| ENSACAG00000003371 | 10266 TMEM136   |
| ENSACAG00000002251 | 10267 CRYGN     |
| ENSACAG00000020711 | 10268 U6        |
| ENSACAG00000008535 | 10269 NOL4L     |
| ENSACAG00000021929 | 10270 CDC42EP5  |
| ENSACAG00000023302 | 10271           |
| ENSACAG00000022701 | 10272 SLC8A3    |
| ENSACAG00000022466 | 10273           |
| ENSACAG00000016457 | 10274 FAM171A1  |
| ENSACAG00000016673 | 10275           |
| ENSACAG00000011335 | 10276 C3orf67   |
| ENSACAG00000002081 | 10277 PLPP5     |
| ENSACAG00000006296 | 10278           |
| ENSACAG00000003676 | 10279 EXD1      |
| ENSACAG00000027911 | 10280           |
| ENSACAG00000010734 | 10281           |
| ENSACAG00000023000 | 10282           |
| ENSACAG00000026209 | 10283           |
| ENSACAG00000026860 | 10284 NKAIN4    |
| ENSACAG00000014355 | 10285 PCDH1     |
| ENSACAG00000003619 | 10286 CCDC64    |
| ENSACAG00000013361 | 10287 PKIA      |
| ENSACAG00000000752 | 10288 SLC38A7   |

|                    |               |
|--------------------|---------------|
| ENSACAG00000000558 | 10289 MOGS    |
| ENSACAG00000014170 | 10290 PLTP    |
| ENSACAG00000009008 | 10291 RAB15   |
| ENSACAG00000007729 | 10292 TLDC1   |
| ENSACAG00000011146 | 10293 KBTBD3  |
| ENSACAG00000004568 | 10294         |
| ENSACAG00000006445 | 10295         |
| ENSACAG00000001548 | 10296 DDX18   |
| ENSACAG00000009827 | 10297 PBX3    |
| ENSACAG00000010329 | 10298 GPR45   |
| ENSACAG00000007411 | 10299         |
| ENSACAG00000024058 | 10300 EVPL    |
| ENSACAG00000027398 | 10301         |
| ENSACAG00000007823 | 10302 CDK20   |
| ENSACAG00000026483 | 10303         |
| ENSACAG00000028746 | 10304         |
| ENSACAG00000004131 | 10305 MLANA   |
| ENSACAG00000018486 | 10306 5S_rRNA |
| ENSACAG00000004802 | 10307 TENM2   |
| ENSACAG00000028718 | 10308 KCNQ1   |
| ENSACAG00000019086 | 10309 5S_rRNA |
| ENSACAG00000008396 | 10310 COLEC12 |
| ENSACAG00000003256 | 10311 LNX2    |
| ENSACAG00000002356 | 10312 DMRT1   |
| ENSACAG00000002715 | 10313         |
| ENSACAG00000002631 | 10314 DUSP19  |
| ENSACAG00000012269 | 10315         |
| ENSACAG00000016960 | 10316 SLFNL1  |
| ENSACAG00000011108 | 10317 ALX1    |
| ENSACAG00000003780 | 10318 FBXO15  |
| ENSACAG00000004626 | 10319 KCNE4   |
| ENSACAG00000025707 | 10320         |
| ENSACAG00000002487 | 10321 SUSD4   |
| ENSACAG00000016380 | 10322 SRL     |
| ENSACAG00000004281 | 10323         |
| ENSACAG00000001677 | 10324 FAM13C  |
| ENSACAG00000010999 | 10325 SMUG1   |
| ENSACAG00000001796 | 10326         |
| ENSACAG00000006968 | 10327         |
| ENSACAG00000014937 | 10328 DPH7    |
| ENSACAG00000002102 | 10329 DUSP10  |
| ENSACAG00000028102 | 10330         |

|                    |                |
|--------------------|----------------|
| ENSACAG00000026167 | 10331          |
| ENSACAG00000002511 | 10332          |
| ENSACAG00000008913 | 10333 RRM2B    |
| ENSACAG00000003596 | 10334          |
| ENSACAG00000011974 | 10335 BPGM     |
| ENSACAG00000011686 | 10336 PIGO     |
| ENSACAG00000001657 | 10337          |
| ENSACAG00000027709 | 10338 CCDC71   |
| ENSACAG00000022297 | 10339          |
| ENSACAG00000007000 | 10340 CPED1    |
| ENSACAG00000011526 | 10341 GOSR1    |
| ENSACAG00000011845 | 10342          |
| ENSACAG00000024062 | 10343          |
| ENSACAG00000001100 | 10344 TARBP2   |
| ENSACAG00000004026 | 10345 TSC1     |
| ENSACAG00000001715 | 10346          |
| ENSACAG00000000671 | 10347 AMHR2    |
| ENSACAG00000015705 | 10348          |
| ENSACAG00000002117 | 10349 GPR63    |
| ENSACAG00000026698 | 10350          |
| ENSACAG00000005895 | 10351 SYT9     |
| ENSACAG00000011830 | 10352          |
| ENSACAG00000014109 | 10353 ARHGAP18 |
| ENSACAG00000018509 | 10354 5S_rRNA  |
| ENSACAG00000002025 | 10355          |
| ENSACAG00000006982 | 10356 PTPN3    |
| ENSACAG00000017845 | 10357 NIPAL3   |
| ENSACAG00000008463 | 10358 ADAMTS14 |
| ENSACAG00000012344 | 10359 SNTG1    |
| ENSACAG00000026111 | 10360          |
| ENSACAG00000006344 | 10361 ANKRD23  |
| ENSACAG00000024624 | 10362          |
| ENSACAG00000006630 | 10363          |
| ENSACAG00000007890 | 10364 HECTD2   |
| ENSACAG00000009323 | 10365 MIEF2    |
| ENSACAG00000015930 | 10366 LCP2     |
| ENSACAG00000010801 | 10367 C5orf34  |
| ENSACAG00000004176 | 10368          |
| ENSACAG00000002201 | 10369          |
| ENSACAG00000026060 | 10370          |
| ENSACAG00000007555 | 10371 ADAT1    |
| ENSACAG00000000854 | 10372          |

|                    |               |
|--------------------|---------------|
| ENSACAG00000016160 | 10373 IGFBP4  |
| ENSACAG00000015577 | 10374         |
| ENSACAG00000006167 | 10375 MEIOB   |
| ENSACAG00000024235 | 10376         |
| ENSACAG00000002282 | 10377 ANKMY1  |
| ENSACAG00000024204 | 10378         |
| ENSACAG00000020026 | 10379 5S_rRNA |
| ENSACAG00000003245 | 10380         |
| ENSACAG00000005122 | 10381         |
| ENSACAG00000004873 | 10382 WWC1    |
| ENSACAG00000024083 | 10383         |
| ENSACAG00000004054 | 10384 VPS33B  |
| ENSACAG00000005713 | 10385         |
| ENSACAG00000010635 | 10386         |
| ENSACAG00000010995 | 10387 LRRC6   |
| ENSACAG00000022717 | 10388         |
| ENSACAG00000009748 | 10389         |
| ENSACAG00000008591 | 10390         |
| ENSACAG00000012145 | 10391 BEND4   |
| ENSACAG00000009766 | 10392 GFRA1   |
| ENSACAG00000005729 | 10393 IL17RD  |
| ENSACAG00000028643 | 10394         |
| ENSACAG00000003165 | 10395 UMODL1  |
| ENSACAG00000020858 | 10396 5S_rRNA |
| ENSACAG00000026328 | 10397         |
| ENSACAG00000005007 | 10398 DOCK11  |
| ENSACAG00000002671 | 10399 CMBL    |
| ENSACAG00000009389 | 10400         |
| ENSACAG00000021135 | 10401         |
| ENSACAG00000006229 | 10402 FAM212B |
| ENSACAG00000029683 | 10403         |
| ENSACAG00000008452 | 10404 NANP    |
| ENSACAG00000000047 | 10405 KCNJ11  |
| ENSACAG00000012763 | 10406         |
| ENSACAG00000012812 | 10407         |
| ENSACAG00000006144 | 10408         |
| ENSACAG00000024944 | 10409         |
| ENSACAG00000026480 | 10410 MEN1    |
| ENSACAG00000017912 | 10411         |
| ENSACAG00000004426 | 10412         |
| ENSACAG00000015834 | 10413         |
| ENSACAG00000007122 | 10414         |



|                     |                |
|---------------------|----------------|
| ENSACAG00000013449  | 10415          |
| ENSACAG00000022982  | 10416          |
| ENSACAG00000021747  | 10417 5S_rRNA  |
| ENSACAG00000012483  | 10418 SHROOM3  |
| ENSACAG00000029073  | 10419 LYPLAL1  |
| ENSACAG00000027268  | 10420          |
| ENSACAG00000006988  | 10421 STAB1    |
| ENSACAG00000001183  | 10422 TGFB2    |
| ENSACAG00000000376  | 10423 LMNTD1   |
| ENSACAG000000003827 | 10424 RHBDD1   |
| ENSACAG000000008801 | 10425 TFAP2A   |
| ENSACAG000000004867 | 10426          |
| ENSACAG000000014673 | 10427 PDE1B    |
| ENSACAG000000029050 | 10428          |
| ENSACAG000000013568 | 10429          |
| ENSACAG000000028988 | 10430          |
| ENSACAG000000014957 | 10431 LRRC56   |
| ENSACAG000000009148 | 10432 DHTKD1   |
| ENSACAG000000025461 | 10433          |
| ENSACAG000000000829 | 10434          |
| ENSACAG000000009189 | 10435 ARR3     |
| ENSACAG000000002481 | 10436 WDR62    |
| ENSACAG000000008675 | 10437          |
| ENSACAG000000026546 | 10438 BTBD8    |
| ENSACAG000000016375 | 10439 PPP1R16A |
| ENSACAG000000004177 | 10440 S1PR2    |
| ENSACAG000000023154 | 10441          |
| ENSACAG000000016686 | 10442 SLC2A10  |
| ENSACAG000000006377 | 10443 C1orf95  |
| ENSACAG000000004235 | 10444 SFI1     |
| ENSACAG000000003563 | 10445 RANGRF   |
| ENSACAG000000001055 | 10446          |
| ENSACAG000000004803 | 10447 SOST     |
| ENSACAG000000010350 | 10448 SEMA5A   |
| ENSACAG000000011509 | 10449 OPA3     |
| ENSACAG000000029162 | 10450          |
| ENSACAG000000005321 | 10451          |
| ENSACAG000000014311 | 10452 INHA     |
| ENSACAG000000029083 | 10453 TUSC3    |
| ENSACAG000000017664 | 10454 THEMIS2  |
| ENSACAG000000026001 | 10455          |
| ENSACAG000000013454 | 10456          |

|                    |                |
|--------------------|----------------|
| ENSACAG00000001119 | 10457          |
| ENSACAG00000009560 | 10458          |
| ENSACAG00000023162 | 10459 DUSP15   |
| ENSACAG00000022234 | 10460          |
| ENSACAG00000009684 | 10461 SLC9A9   |
| ENSACAG00000022012 | 10462          |
| ENSACAG00000018804 | 10463 5S_rRNA  |
| ENSACAG00000009467 | 10464 FGF23    |
| ENSACAG00000010140 | 10465 ENO4     |
| ENSACAG00000004060 | 10466          |
| ENSACAG00000013517 | 10467 PAG1     |
| ENSACAG00000014530 | 10468 ADAMTS1  |
| ENSACAG00000006222 | 10469 MORN2    |
| ENSACAG00000010486 | 10470 LCAT     |
| ENSACAG00000013647 | 10471 CNTNAP2  |
| ENSACAG00000014761 | 10472 NUDT15   |
| ENSACAG00000009660 | 10473 DCSTAMP  |
| ENSACAG00000004901 | 10474 MAP3K9   |
| ENSACAG00000016875 | 10475 EPS8L1   |
| ENSACAG00000029487 | 10476 ZNF774   |
| ENSACAG00000013144 | 10477          |
| ENSACAG00000002647 | 10478 DEPDC5   |
| ENSACAG00000016804 | 10479 NHSL1    |
| ENSACAG00000014086 | 10480          |
| ENSACAG00000017119 | 10481 BCL9L    |
| ENSACAG00000010877 | 10482 METTL24  |
| ENSACAG00000014969 | 10483 FGF12    |
| ENSACAG00000014321 | 10484          |
| ENSACAG00000004403 | 10485 BFSP2    |
| ENSACAG00000000317 | 10486 C17orf58 |
| ENSACAG00000013223 | 10487 CLMN     |
| ENSACAG00000029398 | 10488          |
| ENSACAG00000000970 | 10489 NTNG2    |
| ENSACAG00000028435 | 10490          |
| ENSACAG00000017791 | 10491 TRIM63   |
| ENSACAG00000015709 | 10492 SGSH     |
| ENSACAG00000006600 | 10493 CYBA     |
| ENSACAG00000003141 | 10494 CRTAC1   |
| ENSACAG00000017588 | 10495 BCL2     |
| ENSACAG00000005243 | 10496 ACPT     |
| ENSACAG00000000382 | 10497 CCDC149  |
| ENSACAG00000011381 | 10498          |

|                    |                |
|--------------------|----------------|
| ENSACAG00000010259 | 10499 CALML4   |
| ENSACAG00000021797 | 10500 5S_rRNA  |
| ENSACAG00000009594 | 10501          |
| ENSACAG00000006071 | 10502          |
| ENSACAG00000025310 | 10503          |
| ENSACAG00000001230 | 10504          |
| ENSACAG00000010680 | 10505 LDAH     |
| ENSACAG00000014197 | 10506 DPP4     |
| ENSACAG00000017155 | 10507 TULP1    |
| ENSACAG00000016846 | 10508 ZC2HC1C  |
| ENSACAG00000026171 | 10509          |
| ENSACAG00000005299 | 10510          |
| ENSACAG00000013596 | 10511 SLCO2B1  |
| ENSACAG00000009992 | 10512 OGG1     |
| ENSACAG00000028951 | 10513          |
| ENSACAG00000008223 | 10514 CD34     |
| ENSACAG00000014949 | 10515 NTRK1    |
| ENSACAG00000023247 | 10516 NRSN2    |
| ENSACAG00000014019 | 10517 PDZK1    |
| ENSACAG00000013216 | 10518 PDE5A    |
| ENSACAG00000025553 | 10519          |
| ENSACAG00000021230 | 10520 SCARNA16 |
| ENSACAG00000004644 | 10521 PTPRD    |
| ENSACAG00000011425 | 10522 PPP2R4   |
| ENSACAG00000016014 | 10523 CBX4     |
| ENSACAG00000028452 | 10524 AP5S1    |
| ENSACAG00000007133 | 10525 C3orf18  |
| ENSACAG00000023395 | 10526          |
| ENSACAG00000027062 | 10527          |
| ENSACAG00000003844 | 10528 GMPR     |
| ENSACAG00000003116 | 10529 C12orf66 |
| ENSACAG00000012022 | 10530          |
| ENSACAG00000001020 | 10531 SPR      |
| ENSACAG00000009895 | 10532 SYNPO2L  |
| ENSACAG00000017835 | 10533 MAP3K6   |
| ENSACAG00000001567 | 10534 JAG1     |
| ENSACAG00000011058 | 10535 LRRC7    |
| ENSACAG00000029275 | 10536          |
| ENSACAG00000014400 | 10537 TADA2A   |
| ENSACAG00000006796 | 10538          |
| ENSACAG00000011294 | 10539 STRBP    |
| ENSACAG00000003235 | 10540 OTUD7B   |

|                    |                |
|--------------------|----------------|
| ENSACAG00000022577 | 10541          |
| ENSACAG00000009696 | 10542 DBNDD1   |
| ENSACAG00000000207 | 10543 AMN      |
| ENSACAG00000025301 | 10544          |
| ENSACAG00000025582 | 10545 SLC35E2  |
| ENSACAG00000014274 | 10546 FAM83D   |
| ENSACAG00000010304 | 10547 HOXA11   |
| ENSACAG00000019846 | 10548 7SK      |
| ENSACAG00000001739 | 10549 ROBO1    |
| ENSACAG00000028618 | 10550 PGAP2    |
| ENSACAG00000006205 | 10551          |
| ENSACAG00000013919 | 10552 TRPV1    |
| ENSACAG00000001431 | 10553 FAM19A2  |
| ENSACAG00000015134 | 10554 GABRB2   |
| ENSACAG00000006440 | 10555          |
| ENSACAG00000010165 | 10556          |
| ENSACAG00000007795 | 10557          |
| ENSACAG00000015093 | 10558 CCDC92   |
| ENSACAG00000028689 | 10559          |
| ENSACAG00000011939 | 10560          |
| ENSACAG00000003466 | 10561 PIGM     |
| ENSACAG00000001710 | 10562          |
| ENSACAG00000026973 | 10563          |
| ENSACAG00000000043 | 10564 PLEKHA7  |
| ENSACAG00000004255 | 10565          |
| ENSACAG00000012370 | 10566          |
| ENSACAG00000027005 | 10567          |
| ENSACAG00000016562 | 10568 SPRYD4   |
| ENSACAG00000011633 | 10569 SLC6A4   |
| ENSACAG00000010989 | 10570 ADAMTSL3 |
| ENSACAG00000009915 | 10571          |
| ENSACAG00000003047 | 10572          |
| ENSACAG00000022065 | 10573          |
| ENSACAG00000011771 | 10574 KIF26B   |
| ENSACAG00000005401 | 10575 RIPK4    |
| ENSACAG00000003890 | 10576          |
| ENSACAG00000003754 | 10577 ABCB8    |
| ENSACAG00000012641 | 10578 COL25A1  |
| ENSACAG00000015559 | 10579          |
| ENSACAG00000015672 | 10580 EIF2B4   |
| ENSACAG00000010059 | 10581          |
| ENSACAG00000016805 | 10582 CYP7B1   |

|                    |                   |
|--------------------|-------------------|
| ENSACAG00000009955 | 10583             |
| ENSACAG00000007373 | 10584             |
| ENSACAG00000005198 | 10585 JMJD4       |
| ENSACAG00000009854 | 10586 TDRD1       |
| ENSACAG00000004526 | 10587 N4BP2L1     |
| ENSACAG00000004297 | 10588 NKPD1       |
| ENSACAG00000005848 | 10589 RASL11B     |
| ENSACAG00000024617 | 10590             |
| ENSACAG00000011632 | 10591             |
| ENSACAG00000013409 | 10592             |
| ENSACAG00000001940 | 10593 CTNNAL1     |
| ENSACAG00000004870 | 10594             |
| ENSACAG00000006072 | 10595 ARMC2       |
| ENSACAG00000013162 | 10596 PIF1        |
| ENSACAG00000000826 | 10597             |
| ENSACAG00000006852 | 10598 SH2D3C      |
| ENSACAG00000005169 | 10599 TP53BP1     |
| ENSACAG00000009584 | 10600             |
| ENSACAG00000005376 | 10601 RAB37       |
| ENSACAG00000011253 | 10602             |
| ENSACAG00000014367 | 10603 P4HA3       |
| ENSACAG00000005118 | 10604 EFHC1       |
| ENSACAG00000005047 | 10605 CAMTA1      |
| ENSACAG00000002851 | 10606 METTL3      |
| ENSACAG00000017600 | 10607 POSTN       |
| ENSACAG00000006260 | 10608             |
| ENSACAG00000005275 | 10609 KDELC2      |
| ENSACAG00000009976 | 10610 TCN1        |
| ENSACAG00000014790 | 10611 CHRNE       |
| ENSACAG00000016007 | 10612 FAM57A      |
| ENSACAG00000013813 | 10613 BOP1        |
| ENSACAG00000004638 | 10614 DENND2D     |
| ENSACAG00000020595 | 10615 aca-mir-30b |
| ENSACAG00000006675 | 10616 CSRP2       |
| ENSACAG00000016224 | 10617 INPP5E      |
| ENSACAG00000002076 | 10618 CCDC96      |
| ENSACAG00000006669 | 10619 CEP164      |
| ENSACAG00000011451 | 10620 ZBTB42      |
| ENSACAG00000010295 | 10621             |
| ENSACAG00000011429 | 10622 CREB3       |
| ENSACAG00000024409 | 10623             |
| ENSACAG00000013896 | 10624             |

|                    |               |
|--------------------|---------------|
| ENSACAG00000014773 | 10625 SYTL5   |
| ENSACAG00000029289 | 10626 C3orf14 |
| ENSACAG00000010090 | 10627         |
| ENSACAG00000005860 | 10628 TTLL7   |
| ENSACAG00000000727 | 10629 NUDT22  |
| ENSACAG00000028771 | 10630         |
| ENSACAG00000000020 | 10631         |
| ENSACAG00000007493 | 10632 GALNT9  |
| ENSACAG00000007329 | 10633 P2RX3   |
| ENSACAG00000007322 | 10634 EEPD1   |
| ENSACAG00000006160 | 10635 SLC16A5 |
| ENSACAG00000017781 | 10636 CNKSR1  |
| ENSACAG00000009694 | 10637         |
| ENSACAG00000014063 | 10638 PAX2    |
| ENSACAG00000007891 | 10639         |
| ENSACAG00000013347 | 10640 PCDH18  |
| ENSACAG00000029518 | 10641 DNAJC4  |
| ENSACAG00000024844 | 10642         |
| ENSACAG00000009339 | 10643         |
| ENSACAG00000012740 | 10644         |
| ENSACAG00000006471 | 10645         |
| ENSACAG00000014546 | 10646         |
| ENSACAG00000007675 | 10647 GTF3C2  |
| ENSACAG00000006921 | 10648 TTC16   |
| ENSACAG00000007093 | 10649 TLDC2   |
| ENSACAG00000022348 | 10650         |
| ENSACAG00000028612 | 10651         |
| ENSACAG00000014584 | 10652 SYN3    |
| ENSACAG00000004761 | 10653 HOMER2  |
| ENSACAG00000012885 | 10654         |
| ENSACAG00000029349 | 10655 TMEM220 |
| ENSACAG00000028075 | 10656         |
| ENSACAG00000007834 | 10657 ESRRA   |
| ENSACAG00000025883 | 10658 7SK     |
| ENSACAG00000001983 | 10659         |
| ENSACAG00000004664 | 10660         |
| ENSACAG00000008848 | 10661 DENND4B |
| ENSACAG00000005678 | 10662 GPR146  |
| ENSACAG00000014785 | 10663 TNR     |
| ENSACAG00000006571 | 10664 CADPS2  |
| ENSACAG00000006478 | 10665         |
| ENSACAG00000017350 | 10666 FLT3LG  |

|                    |                |
|--------------------|----------------|
| ENSACAG00000006479 | 10667          |
| ENSACAG00000028121 | 10668          |
| ENSACAG00000000330 | 10669 FERMT3   |
| ENSACAG00000011486 | 10670 KIAA1147 |
| ENSACAG00000001350 | 10671 ECE2     |
| ENSACAG00000011787 | 10672 CASZ1    |
| ENSACAG00000009480 | 10673 MRPL17   |
| ENSACAG00000006293 | 10674 CCDC146  |
| ENSACAG00000012904 | 10675 HEPACAM2 |
| ENSACAG00000000656 | 10676          |
| ENSACAG00000000459 | 10677          |
| ENSACAG00000007243 | 10678 DOCK3    |
| ENSACAG00000022516 | 10679          |
| ENSACAG00000018538 | 10680 5S_rRNA  |
| ENSACAG00000010795 | 10681 ERP27    |
| ENSACAG00000011910 | 10682 NR2E3    |
| ENSACAG00000005868 | 10683 CFAP46   |
| ENSACAG00000015171 | 10684 PAPSS2   |
| ENSACAG00000004920 | 10685 NEURL1   |
| ENSACAG00000011801 | 10686 SGSM2    |
| ENSACAG00000007024 | 10687 GABRG1   |
| ENSACAG00000015359 | 10688 INTS5    |
| ENSACAG00000009162 | 10689          |
| ENSACAG00000008845 | 10690 LONRF1   |
| ENSACAG00000011583 | 10691 CHERP    |
| ENSACAG00000013423 | 10692 AK7      |
| ENSACAG00000017252 | 10693 TULP2    |
| ENSACAG00000021129 | 10694          |
| ENSACAG00000005085 | 10695 KCNC3    |
| ENSACAG00000004340 | 10696          |
| ENSACAG00000009637 | 10697 ACSM3    |
| ENSACAG00000001962 | 10698 PASK     |
| ENSACAG00000007796 | 10699 CBX7     |
| ENSACAG00000022072 | 10700 P2RX7    |
| ENSACAG00000016657 | 10701 MYBPC1   |
| ENSACAG00000001445 | 10702          |
| ENSACAG00000007387 | 10703 FAM83F   |
| ENSACAG00000003464 | 10704 NGF      |
| ENSACAG00000016821 | 10705 NEK5     |
| ENSACAG00000011189 | 10706 ZBTB12   |
| ENSACAG00000004039 | 10707 B3GAT3   |
| ENSACAG00000006301 | 10708 NR5A2    |

|                    |                |
|--------------------|----------------|
| ENSACAG00000023200 | 10709          |
| ENSACAG00000013254 | 10710 TIE1     |
| ENSACAG00000020597 | 10711          |
| ENSACAG00000027613 | 10712          |
| ENSACAG00000027200 | 10713          |
| ENSACAG00000016931 | 10714 ECHDC3   |
| ENSACAG00000004636 | 10715 TTBK1    |
| ENSACAG00000011236 | 10716          |
| ENSACAG00000012360 | 10717          |
| ENSACAG00000002001 | 10718 CCDC83   |
| ENSACAG00000014779 | 10719 TNFSF12  |
| ENSACAG00000006901 | 10720 GABRA2   |
| ENSACAG00000023482 | 10721          |
| ENSACAG00000014743 | 10722 SDHAF3   |
| ENSACAG00000010018 | 10723 ALPK2    |
| ENSACAG00000028801 | 10724          |
| ENSACAG00000029314 | 10725          |
| ENSACAG00000001495 | 10726 KCNH1    |
| ENSACAG00000002769 | 10727 ACTN2    |
| ENSACAG00000010322 | 10728 HOXA7    |
| ENSACAG00000015344 | 10729 RPS6KA2  |
| ENSACAG00000007096 | 10730 MOCOS    |
| ENSACAG00000015420 | 10731 GDF11    |
| ENSACAG00000015325 | 10732 TRIM3    |
| ENSACAG00000012990 | 10733 TNIP3    |
| ENSACAG00000008502 | 10734          |
| ENSACAG00000012919 | 10735 TPRN     |
| ENSACAG00000001462 | 10736 TYSND1   |
| ENSACAG00000001391 | 10737 SLC25A21 |
| ENSACAG00000007300 | 10738 SLC7A8   |
| ENSACAG00000021072 | 10739 HFM1     |
| ENSACAG00000015035 | 10740 ATP1A3   |
| ENSACAG00000008164 | 10741 AFF3     |
| ENSACAG00000001803 | 10742          |
| ENSACAG00000002483 | 10743 TLR5     |
| ENSACAG00000008400 | 10744 CIB2     |
| ENSACAG00000011581 | 10745          |
| ENSACAG00000024931 | 10746          |
| ENSACAG00000001621 | 10747 CLVS2    |
| ENSACAG00000009247 | 10748 SEMA3B   |
| ENSACAG00000001735 | 10749 KIF27    |
| ENSACAG00000016842 | 10750 MLH3     |



|                    |                 |
|--------------------|-----------------|
| ENSACAG00000013006 | 10751 ABHD1     |
| ENSACAG00000011806 | 10752 EML6      |
| ENSACAG00000008247 | 10753 SYNM      |
| ENSACAG00000017250 | 10754           |
| ENSACAG00000017909 | 10755           |
| ENSACAG00000016766 | 10756 HIF3A     |
| ENSACAG00000016658 | 10757 RAB44     |
| ENSACAG00000028319 | 10758           |
| ENSACAG00000029177 | 10759           |
| ENSACAG00000021472 | 10760 5S_rRNA   |
| ENSACAG00000009724 | 10761 PTGFRN    |
| ENSACAG00000013251 | 10762           |
| ENSACAG00000004268 | 10763 TFCP2L1   |
| ENSACAG00000027866 | 10764           |
| ENSACAG00000010813 | 10765 ZNF365    |
| ENSACAG00000007376 | 10766 CAPN13    |
| ENSACAG00000015655 | 10767 C2CD2L    |
| ENSACAG00000012709 | 10768 EPHA5     |
| ENSACAG00000019389 | 10769 5S_rRNA   |
| ENSACAG00000011201 | 10770 APEX2     |
| ENSACAG00000018471 | 10771 5S_rRNA   |
| ENSACAG00000025429 | 10772           |
| ENSACAG00000010620 | 10773           |
| ENSACAG00000012384 | 10774 HSD17B7   |
| ENSACAG00000026697 | 10775           |
| ENSACAG00000014420 | 10776 STK32A    |
| ENSACAG00000016576 | 10777 LMTK3     |
| ENSACAG00000003369 | 10778 SOX30     |
| ENSACAG00000017587 | 10779 BEST1     |
| ENSACAG00000029644 | 10780           |
| ENSACAG00000004512 | 10781 NACAD     |
| ENSACAG00000016786 | 10782 GLRB      |
| ENSACAG00000013437 | 10783 SYNPO2    |
| ENSACAG00000002447 | 10784 ST3GAL2   |
| ENSACAG00000001236 | 10785           |
| ENSACAG00000007302 | 10786 SLC9A2    |
| ENSACAG00000005355 | 10787           |
| ENSACAG00000010722 | 10788 ISYNA1    |
| ENSACAG00000008436 | 10789 CHRFBAM7A |
| ENSACAG00000005024 | 10790 PPIP5K1   |
| ENSACAG00000025755 | 10791           |
| ENSACAG00000016524 | 10792 SPATA16   |

|                    |               |
|--------------------|---------------|
| ENSACAG00000005155 | 10793 PLEKHD1 |
| ENSACAG00000000533 | 10794 D2HGDH  |
| ENSACAG00000023981 | 10795         |
| ENSACAG00000014808 | 10796 SPEF1   |
| ENSACAG00000023749 | 10797         |
| ENSACAG00000016179 | 10798 SYT16   |
| ENSACAG00000011791 | 10799 MNT     |
| ENSACAG00000022888 | 10800         |
| ENSACAG00000014333 | 10801 COMP    |
| ENSACAG00000029452 | 10802         |
| ENSACAG00000004983 | 10803         |
| ENSACAG00000012617 | 10804 C9orf84 |
| ENSACAG00000000081 | 10805 FAM169B |
| ENSACAG00000004907 | 10806 NXNL1   |
| ENSACAG00000013249 | 10807 TMEM125 |
| ENSACAG00000017958 | 10808 TGM3    |
| ENSACAG00000023562 | 10809         |
| ENSACAG00000000080 | 10810 ARRDC4  |
| ENSACAG00000001969 | 10811 MMP23B  |
| ENSACAG00000006003 | 10812 FUT10   |
| ENSACAG00000007135 | 10813 TRAF2   |
| ENSACAG00000007857 | 10814         |
| ENSACAG00000012146 | 10815 RC3H2   |
| ENSACAG00000008035 | 10816 THTPA   |
| ENSACAG00000003921 | 10817         |
| ENSACAG00000003395 | 10818 GRB7    |
| ENSACAG00000029190 | 10819 FANCG   |
| ENSACAG00000026455 | 10820         |
| ENSACAG00000013228 | 10821         |
| ENSACAG00000006626 | 10822         |
| ENSACAG00000027886 | 10823         |
| ENSACAG00000000284 | 10824 STX17   |
| ENSACAG00000017495 | 10825         |
| ENSACAG00000015062 | 10826 COL3A1  |
| ENSACAG00000009836 | 10827 RPUSD3  |
| ENSACAG00000007813 | 10828         |
| ENSACAG00000019760 | 10829 5S_rRNA |
| ENSACAG00000000733 | 10830 CLDN16  |
| ENSACAG00000008729 | 10831 ADCYAP1 |
| ENSACAG00000007140 | 10832         |
| ENSACAG00000012220 | 10833 COL16A1 |
| ENSACAG00000005568 | 10834 FAM161A |

|                    |                   |
|--------------------|-------------------|
| ENSACAG00000009858 | 10835 ZFPM2       |
| ENSACAG00000002639 | 10836 CCDC73      |
| ENSACAG00000014633 | 10837 GABRR1      |
| ENSACAG00000006345 | 10838 BATF3       |
| ENSACAG00000002520 | 10839             |
| ENSACAG00000008487 | 10840 ENOSF1      |
| ENSACAG00000005978 | 10841             |
| ENSACAG00000016357 | 10842 CCDC114     |
| ENSACAG00000000538 | 10843 THUMPD2     |
| ENSACAG00000014867 | 10844 EMILIN1     |
| ENSACAG00000017582 | 10845             |
| ENSACAG00000012196 | 10846 IL17RA      |
| ENSACAG00000001898 | 10847 C14orf93    |
| ENSACAG00000024056 | 10848             |
| ENSACAG00000028908 | 10849 CDH23       |
| ENSACAG00000014898 | 10850 GABRA1      |
| ENSACAG00000003843 | 10851 NYAP2       |
| ENSACAG00000011831 | 10852 KLHL10      |
| ENSACAG00000010754 | 10853 SEPT1       |
| ENSACAG00000011687 | 10854 ABI3BP      |
| ENSACAG00000009160 | 10855 ANO2        |
| ENSACAG00000025213 | 10856 Metazoa_SRP |
| ENSACAG00000001294 | 10857 PACRGL      |
| ENSACAG00000001062 | 10858             |
| ENSACAG00000023901 | 10859             |
| ENSACAG00000000116 | 10860             |
| ENSACAG00000017955 | 10861             |
| ENSACAG00000014163 | 10862 FAM162B     |
| ENSACAG00000001923 | 10863 TNFSF11     |
| ENSACAG00000026923 | 10864             |
| ENSACAG00000004369 | 10865 ROBO2       |
| ENSACAG00000015305 | 10866             |
| ENSACAG00000009531 | 10867 BCL3        |
| ENSACAG00000001789 | 10868 ANO7        |
| ENSACAG00000010188 | 10869 RSPO2       |
| ENSACAG00000011320 | 10870 SSH1        |
| ENSACAG00000012109 | 10871 CLEC11A     |
| ENSACAG00000001757 | 10872 SH2D4B      |
| ENSACAG00000006055 | 10873 SHOX        |
| ENSACAG00000016646 | 10874             |
| ENSACAG00000015363 | 10875             |
| ENSACAG00000005525 | 10876 PCSK5       |

|                    |               |
|--------------------|---------------|
| ENSACAG00000011919 | 10877 TRIM7   |
| ENSACAG00000016407 | 10878         |
| ENSACAG00000014723 | 10879 WDR81   |
| ENSACAG00000013306 | 10880 KCNK10  |
| ENSACAG00000002000 | 10881 IDNK    |
| ENSACAG00000005521 | 10882 GRIN2C  |
| ENSACAG00000014951 | 10883 DDX4    |
| ENSACAG00000029597 | 10884         |
| ENSACAG00000015871 | 10885 CFAP69  |
| ENSACAG00000015214 | 10886 PICK1   |
| ENSACAG00000008236 | 10887 IKZF1   |
| ENSACAG00000002608 | 10888 DGCR14  |
| ENSACAG00000008759 | 10889 GRHL2   |
| ENSACAG00000008313 | 10890 ASB6    |
| ENSACAG00000004196 | 10891         |
| ENSACAG00000012899 | 10892 MCOLN2  |
| ENSACAG00000011098 | 10893 OCA2    |
| ENSACAG00000017265 | 10894         |
| ENSACAG00000024034 | 10895         |
| ENSACAG00000004728 | 10896         |
| ENSACAG00000026996 | 10897         |
| ENSACAG00000001808 | 10898 FAM83H  |
| ENSACAG00000011025 | 10899 DTX3    |
| ENSACAG00000007163 | 10900 FAM69B  |
| ENSACAG00000014748 | 10901 MMRN2   |
| ENSACAG00000022657 | 10902         |
| ENSACAG00000024733 | 10903 ZFPM1   |
| ENSACAG00000025337 | 10904         |
| ENSACAG00000027261 | 10905 SLC45A3 |
| ENSACAG00000004252 | 10906 GCH1    |
| ENSACAG00000001008 | 10907 GBA3    |
| ENSACAG00000002233 | 10908         |
| ENSACAG00000006959 | 10909 AGTR1   |
| ENSACAG00000015002 | 10910 F13A1   |
| ENSACAG00000012953 | 10911 CAPRN2  |
| ENSACAG00000014191 | 10912         |
| ENSACAG00000014462 | 10913 MED17   |
| ENSACAG00000011129 | 10914         |
| ENSACAG00000015013 | 10915 RABAC1  |
| ENSACAG00000000084 | 10916 SLCO3A1 |
| ENSACAG00000010444 | 10917         |
| ENSACAG00000015961 | 10918         |

|                    |                |
|--------------------|----------------|
| ENSACAG00000025595 | 10919          |
| ENSACAG00000008333 | 10920 NME6     |
| ENSACAG00000008953 | 10921 RPUSD1   |
| ENSACAG00000003942 | 10922          |
| ENSACAG00000008061 | 10923 DRP2     |
| ENSACAG00000006252 | 10924 FAM73A   |
| ENSACAG00000015900 | 10925 SYNE2    |
| ENSACAG00000012907 | 10926          |
| ENSACAG00000000525 | 10927 TRIM9    |
| ENSACAG00000008777 | 10928 SLC39A11 |
| ENSACAG00000010964 | 10929          |
| ENSACAG00000006873 | 10930 RAB27A   |
| ENSACAG00000013588 | 10931          |
| ENSACAG00000028816 | 10932          |
| ENSACAG00000000032 | 10933 B4GALNT3 |
| ENSACAG00000012448 | 10934 EGFL8    |
| ENSACAG00000009634 | 10935          |
| ENSACAG00000029136 | 10936          |
| ENSACAG00000014952 | 10937 GAP43    |
| ENSACAG00000009795 | 10938 OSBP2    |
| ENSACAG00000010683 | 10939 CLU      |
| ENSACAG00000004112 | 10940 DHX34    |
| ENSACAG00000027915 | 10941          |
| ENSACAG00000013110 | 10942 ACSF3    |
| ENSACAG00000014751 | 10943 NCOR1    |
| ENSACAG00000003782 | 10944 PIEZO2   |
| ENSACAG00000012575 | 10945 TRIM62   |
| ENSACAG00000016285 | 10946 CACNG2   |
| ENSACAG00000000707 | 10947          |
| ENSACAG00000010609 | 10948 FBXL6    |
| ENSACAG00000000215 | 10949 SPA17    |
| ENSACAG00000017652 | 10950 USP43    |
| ENSACAG00000017103 | 10951 LRGUK    |
| ENSACAG00000007447 | 10952          |
| ENSACAG00000009204 | 10953 BRSK2    |
| ENSACAG00000021839 | 10954 SCARNA18 |
| ENSACAG00000000465 | 10955 DACH1    |
| ENSACAG00000029448 | 10956          |
| ENSACAG00000020561 | 10957 5S_rRNA  |
| ENSACAG00000003753 | 10958 ANGPTL6  |
| ENSACAG00000005679 | 10959          |
| ENSACAG00000012595 | 10960 FBLN2    |

|                    |                |
|--------------------|----------------|
| ENSACAG00000010721 | 10961 NIM1K    |
| ENSACAG00000011517 | 10962 FHAD1    |
| ENSACAG00000002775 | 10963          |
| ENSACAG00000010191 | 10964          |
| ENSACAG00000027215 | 10965          |
| ENSACAG00000008099 | 10966 APEX1    |
| ENSACAG00000028486 | 10967 GGT6     |
| ENSACAG00000027328 | 10968          |
| ENSACAG00000028207 | 10969          |
| ENSACAG00000026814 | 10970          |
| ENSACAG00000007072 | 10971 SNCB     |
| ENSACAG00000019818 | 10972 5S_rRNA  |
| ENSACAG00000000716 | 10973 TBX3     |
| ENSACAG00000004733 | 10974          |
| ENSACAG00000006435 | 10975 RGS14    |
| ENSACAG00000004574 | 10976 MROH1    |
| ENSACAG00000007107 | 10977 GRXCR1   |
| ENSACAG00000008103 | 10978 ZNF276   |
| ENSACAG00000024528 | 10979          |
| ENSACAG00000008955 | 10980          |
| ENSACAG00000014261 | 10981 MFSD4    |
| ENSACAG00000008473 | 10982 RMDN2    |
| ENSACAG00000013846 | 10983          |
| ENSACAG00000006750 | 10984          |
| ENSACAG00000012840 | 10985 RAP1GAP2 |
| ENSACAG00000028831 | 10986 STBD1    |
| ENSACAG00000008865 | 10987 PLPP2    |
| ENSACAG00000009405 | 10988          |
| ENSACAG00000007657 | 10989 CTNNA2   |
| ENSACAG00000023620 | 10990          |
| ENSACAG00000002171 | 10991 DPP10    |
| ENSACAG00000007119 | 10992 AGXT     |
| ENSACAG00000017949 | 10993 TMEM201  |
| ENSACAG00000016994 | 10994 MAP7     |
| ENSACAG00000002927 | 10995 AMPD1    |
| ENSACAG00000005517 | 10996 FAM83C   |
| ENSACAG00000015111 | 10997          |
| ENSACAG00000000663 | 10998 PCSK2    |
| ENSACAG00000001742 | 10999 SLC38A4  |
| ENSACAG00000012759 | 11000 SLC16A4  |
| ENSACAG00000007652 | 11001 CFTR     |
| ENSACAG00000025622 | 11002          |

|                    |                |
|--------------------|----------------|
| ENSACAG00000008980 | 11003 ACAD10   |
| ENSACAG00000004551 | 11004 MLPH     |
| ENSACAG00000008374 | 11005 CACTIN   |
| ENSACAG00000013131 | 11006 CAPN6    |
| ENSACAG00000017233 | 11007 FAM73B   |
| ENSACAG00000022548 | 11008          |
| ENSACAG00000017786 | 11009 AIFM2    |
| ENSACAG00000017390 | 11010          |
| ENSACAG00000027024 | 11011 ONECUT1  |
| ENSACAG00000011167 | 11012 GRIA4    |
| ENSACAG00000029444 | 11013          |
| ENSACAG00000000899 | 11014 MAP3K12  |
| ENSACAG00000019795 | 11015 U7       |
| ENSACAG00000013098 | 11016          |
| ENSACAG00000028293 | 11017 CDNF     |
| ENSACAG00000003831 | 11018 STXBP1   |
| ENSACAG00000010690 | 11019 PLAC8    |
| ENSACAG00000001708 | 11020          |
| ENSACAG00000008988 | 11021 NR4A3    |
| ENSACAG00000017309 | 11022 SAPCD1   |
| ENSACAG00000017801 | 11023 SLC30A2  |
| ENSACAG00000008050 | 11024 LEF1     |
| ENSACAG00000005308 | 11025 FAM110B  |
| ENSACAG00000007391 | 11026 ZNF2     |
| ENSACAG00000015843 | 11027          |
| ENSACAG00000005048 | 11028 SMOC1    |
| ENSACAG00000014180 | 11029 DYNC1I1  |
| ENSACAG00000009181 | 11030 BMPER    |
| ENSACAG00000000361 | 11031          |
| ENSACAG00000007205 | 11032 SMTNL1   |
| ENSACAG00000006849 | 11033 ARHGEF26 |
| ENSACAG00000007477 | 11034 IL1R2    |
| ENSACAG00000004849 | 11035          |
| ENSACAG00000008633 | 11036          |
| ENSACAG00000016283 | 11037 NT5DC3   |
| ENSACAG00000025446 | 11038          |
| ENSACAG00000014196 | 11039 PTGES2   |
| ENSACAG00000006855 | 11040 LPXN     |
| ENSACAG00000028472 | 11041 PPP1R1C  |
| ENSACAG00000017331 | 11042          |
| ENSACAG00000028826 | 11043 TNFRSF14 |
| ENSACAG00000003674 | 11044 TNFAIP6  |

|                    |                |
|--------------------|----------------|
| ENSACAG00000002644 | 11045 B4GAT1   |
| ENSACAG00000028031 | 11046          |
| ENSACAG00000001811 | 11047 SIN3B    |
| ENSACAG00000008659 | 11048 CABIN1   |
| ENSACAG00000014572 | 11049 KLHDC8A  |
| ENSACAG00000010185 | 11050 STAC     |
| ENSACAG00000012368 | 11051 RCOR2    |
| ENSACAG00000000857 | 11052 LHX4     |
| ENSACAG00000016063 | 11053 GPC3     |
| ENSACAG00000007755 | 11054 ERICH6   |
| ENSACAG00000011005 | 11055 TMEM26   |
| ENSACAG00000002122 | 11056 KLHL32   |
| ENSACAG00000007838 | 11057 ILK      |
| ENSACAG00000012815 | 11058 ISPD     |
| ENSACAG00000004934 | 11059 C11orf63 |
| ENSACAG00000002314 | 11060 FAM131A  |
| ENSACAG00000010021 | 11061 PITPNM1  |
| ENSACAG00000025259 | 11062          |
| ENSACAG00000009460 | 11063 SLC9A3   |
| ENSACAG00000003720 | 11064 ZNF804A  |
| ENSACAG00000001379 | 11065 FICD     |
| ENSACAG00000009925 | 11066          |
| ENSACAG00000002220 | 11067 GDPD4    |
| ENSACAG00000021037 | 11068          |
| ENSACAG00000002546 | 11069          |
| ENSACAG00000016242 | 11070 DHRS13   |
| ENSACAG00000008547 | 11071          |
| ENSACAG00000029401 | 11072          |
| ENSACAG00000012554 | 11073 MACROD1  |
| ENSACAG00000007751 | 11074          |
| ENSACAG00000004239 | 11075 PLCH1    |
| ENSACAG00000015165 | 11076 TENM1    |
| ENSACAG00000022061 | 11077          |
| ENSACAG00000015022 | 11078          |
| ENSACAG00000007179 | 11079          |
| ENSACAG00000004731 | 11080 ZBTB43   |
| ENSACAG00000002160 | 11081          |
| ENSACAG00000016161 | 11082 KCNH5    |
| ENSACAG00000005091 | 11083          |
| ENSACAG00000023239 | 11084          |
| ENSACAG00000028502 | 11085 CXCL14   |
| ENSACAG00000006162 | 11086          |



|                    |                |
|--------------------|----------------|
| ENSACAG00000011514 | 11087 C2orf195 |
| ENSACAG00000009773 | 11088 DNMT3B   |
| ENSACAG00000009235 | 11089 NEBL     |
| ENSACAG00000027959 | 11090          |
| ENSACAG00000028490 | 11091          |
| ENSACAG00000004382 | 11092          |
| ENSACAG00000011521 | 11093 AQP10    |
| ENSACAG00000028377 | 11094          |
| ENSACAG00000015016 | 11095 SPIRE2   |
| ENSACAG00000006215 | 11096          |
| ENSACAG00000003510 | 11097 NIPAL4   |
| ENSACAG00000010740 | 11098 LRRC74B  |
| ENSACAG00000027519 | 11099          |
| ENSACAG00000018287 | 11100 U1       |
| ENSACAG00000028800 | 11101          |
| ENSACAG00000004659 | 11102 KIAA1107 |
| ENSACAG00000005200 | 11103 ABCA4    |
| ENSACAG00000019522 | 11104 SNORD79  |
| ENSACAG00000011617 | 11105 GABRB3   |
| ENSACAG00000004786 | 11106          |
| ENSACAG00000003824 | 11107 FAM65C   |
| ENSACAG00000008397 | 11108 RGS2     |
| ENSACAG00000009316 | 11109          |
| ENSACAG00000003418 | 11110          |
| ENSACAG00000016542 | 11111 CACNG7   |
| ENSACAG00000005342 | 11112 CIB3     |
| ENSACAG00000029466 | 11113          |
| ENSACAG00000008993 | 11114 TRPM3    |
| ENSACAG00000028768 | 11115 IQCK     |
| ENSACAG00000011970 | 11116 ADAD1    |
| ENSACAG00000023451 | 11117          |
| ENSACAG00000009688 | 11118 GLRA1    |
| ENSACAG00000023858 | 11119          |
| ENSACAG00000004053 | 11120 PPP4R4   |
| ENSACAG00000001297 | 11121 SUSD3    |
| ENSACAG00000014926 | 11122 LHX2     |
| ENSACAG00000016969 | 11123 NME5     |
| ENSACAG00000013824 | 11124          |
| ENSACAG00000017180 | 11125 LOXL1    |
| ENSACAG00000000611 | 11126 DUSP23   |
| ENSACAG00000016149 | 11127 IGSF9B   |
| ENSACAG00000015837 | 11128 SCG5     |

|                    |                    |
|--------------------|--------------------|
| ENSACAG00000010732 | 11129 PNOC         |
| ENSACAG00000000847 | 11130 FANK1        |
| ENSACAG00000022875 | 11131 ZNF22        |
| ENSACAG00000003947 | 11132 ITGA2        |
| ENSACAG00000016398 | 11133 NPHS1        |
| ENSACAG00000012816 | 11134 CEP126       |
| ENSACAG00000003285 | 11135 ZPBP2        |
| ENSACAG00000020164 | 11136 snosnR60_Z15 |
| ENSACAG00000008677 | 11137 GCM2         |
| ENSACAG00000004013 | 11138 RBFOX1       |
| ENSACAG00000008534 | 11139 NLRC4        |
| ENSACAG00000029512 | 11140              |
| ENSACAG00000006418 | 11141 C1QL2        |
| ENSACAG00000014663 | 11142 PAPP2        |
| ENSACAG00000013586 | 11143 MITF         |
| ENSACAG00000015923 | 11144 CDH18        |
| ENSACAG00000006494 | 11145 SEC14L5      |
| ENSACAG00000003521 | 11146              |
| ENSACAG00000027928 | 11147              |
| ENSACAG00000008536 | 11148 THNSL1       |
| ENSACAG00000001875 | 11149 DDX27        |
| ENSACAG00000011941 | 11150              |
| ENSACAG00000013883 | 11151 KIAA0100     |
| ENSACAG00000007549 | 11152 KLHDC9       |
| ENSACAG00000025597 | 11153              |
| ENSACAG00000028260 | 11154 EXOC3L4      |
| ENSACAG00000014495 | 11155 LRTOMT       |
| ENSACAG00000028501 | 11156              |
| ENSACAG00000014798 | 11157 JAKMIP2      |
| ENSACAG00000014721 | 11158 FRMD7        |
| ENSACAG00000005618 | 11159              |
| ENSACAG00000027008 | 11160              |
| ENSACAG00000003776 | 11161 DFN31        |
| ENSACAG00000027372 | 11162 CCDC142      |
| ENSACAG00000025612 | 11163 NTSR1        |
| ENSACAG00000000103 | 11164 TIRAP        |
| ENSACAG00000005650 | 11165 GLRA3        |
| ENSACAG00000017139 | 11166 ABCC9        |
| ENSACAG00000009314 | 11167 MYO19        |
| ENSACAG00000004991 | 11168 KLHL1        |
| ENSACAG00000003221 | 11169 LRP1B        |
| ENSACAG00000009837 | 11170              |

|                     |                    |
|---------------------|--------------------|
| ENSACAG00000000315  | 11171              |
| ENSACAG000000009661 | 11172 LRRC73       |
| ENSACAG000000025490 | 11173 ARHGEF10L    |
| ENSACAG000000024865 | 11174 SERPINB2     |
| ENSACAG000000000978 | 11175 NTRK2        |
| ENSACAG000000009490 | 11176 ATP6V0D2     |
| ENSACAG000000001571 | 11177 STYXL1       |
| ENSACAG000000001331 | 11178 CAMK2N2      |
| ENSACAG000000017644 | 11179 XKR8         |
| ENSACAG000000017514 | 11180 PDE3A        |
| ENSACAG000000004222 | 11181 LSG1         |
| ENSACAG000000008171 | 11182 DGKG         |
| ENSACAG000000013964 | 11183              |
| ENSACAG000000011079 | 11184              |
| ENSACAG000000028136 | 11185              |
| ENSACAG000000000187 | 11186 MAST3        |
| ENSACAG000000012378 | 11187 BHLHA15      |
| ENSACAG000000015624 | 11188 NPTX1        |
| ENSACAG000000015645 | 11189 ENDOV        |
| ENSACAG000000004476 | 11190              |
| ENSACAG000000008097 | 11191              |
| ENSACAG000000012906 | 11192              |
| ENSACAG000000006325 | 11193 ALCAM        |
| ENSACAG000000028448 | 11194 OTUD1        |
| ENSACAG000000028732 | 11195              |
| ENSACAG000000000244 | 11196 CDH9         |
| ENSACAG000000007449 | 11197 GCC1         |
| ENSACAG000000022195 | 11198              |
| ENSACAG000000027880 | 11199              |
| ENSACAG000000006000 | 11200 GUCA1B       |
| ENSACAG000000026085 | 11201              |
| ENSACAG000000008442 | 11202 SAMD12       |
| ENSACAG000000006940 | 11203              |
| ENSACAG000000018302 | 11204 5S_rRNA      |
| ENSACAG000000010611 | 11205 CPNE5        |
| ENSACAG000000019789 | 11206 aca-mir-301b |
| ENSACAG000000028673 | 11207 CD19         |
| ENSACAG000000011642 | 11208              |
| ENSACAG000000011196 | 11209 INTS3        |
| ENSACAG000000004902 | 11210 TMEM107      |
| ENSACAG000000022971 | 11211 ZBTB16       |
| ENSACAG000000003815 | 11212 SEMA4G       |

|                    |                |
|--------------------|----------------|
| ENSACAG00000027652 | 11213          |
| ENSACAG00000008380 | 11214 AANAT    |
| ENSACAG00000016491 | 11215 ITGA8    |
| ENSACAG00000010626 | 11216 HEBP1    |
| ENSACAG00000007126 | 11217 KCTD14   |
| ENSACAG00000006064 | 11218 COL2A1   |
| ENSACAG00000014457 | 11219 KCNG3    |
| ENSACAG00000016415 | 11220          |
| ENSACAG00000022323 | 11221          |
| ENSACAG00000014960 | 11222          |
| ENSACAG00000014291 | 11223 ARTN     |
| ENSACAG00000022161 | 11224          |
| ENSACAG00000012965 | 11225 CACNA1F  |
| ENSACAG00000008119 | 11226 ABCD2    |
| ENSACAG00000007519 | 11227 PTCHD1   |
| ENSACAG00000006631 | 11228 SIDT1    |
| ENSACAG00000000509 | 11229          |
| ENSACAG00000012979 | 11230 MALL     |
| ENSACAG00000000794 | 11231 DMTN     |
| ENSACAG00000015001 | 11232 NRN1     |
| ENSACAG00000010068 | 11233 SMPD3    |
| ENSACAG00000028876 | 11234          |
| ENSACAG00000028889 | 11235          |
| ENSACAG00000008161 | 11236 C1orf174 |
| ENSACAG00000017100 | 11237 LHFPL5   |
| ENSACAG00000000928 | 11238 ACBD4    |
| ENSACAG00000016250 | 11239 PVALB    |
| ENSACAG00000004520 | 11240          |
| ENSACAG00000015032 | 11241 GRM5     |
| ENSACAG00000016208 | 11242 CSF2RB   |
| ENSACAG00000004564 | 11243 RET      |
| ENSACAG00000029389 | 11244 C4orf17  |
| ENSACAG00000017538 | 11245          |
| ENSACAG00000004547 | 11246 FBXL12   |
| ENSACAG00000010790 | 11247 GPR137   |
| ENSACAG00000015282 | 11248          |
| ENSACAG00000008785 | 11249 SLC16A12 |
| ENSACAG00000011985 | 11250          |
| ENSACAG00000003046 | 11251 MARVELD1 |
| ENSACAG00000004611 | 11252 KLHDC8B  |
| ENSACAG00000007780 | 11253 GALNT5   |
| ENSACAG00000013914 | 11254 PLAC8L1  |

|                    |               |
|--------------------|---------------|
| ENSACAG00000013506 | 11255 PTCHD4  |
| ENSACAG00000028494 | 11256         |
| ENSACAG00000013046 | 11257 GDF9    |
| ENSACAG00000015920 | 11258 ELFN2   |
| ENSACAG00000009344 | 11259 FLT1    |
| ENSACAG00000001087 | 11260 CHIC1   |
| ENSACAG00000017708 | 11261 PSIP1   |
| ENSACAG00000029491 | 11262         |
| ENSACAG00000020296 | 11263 7SK     |
| ENSACAG00000015613 | 11264         |
| ENSACAG00000005616 | 11265 FAM105A |
| ENSACAG00000000055 | 11266 KCNC1   |
| ENSACAG00000012410 | 11267 MOGAT2  |
| ENSACAG00000016769 | 11268 RPS6KL1 |
| ENSACAG00000016876 | 11269 ACVRL1  |
| ENSACAG00000006365 | 11270 PTPRC   |
| ENSACAG00000016143 | 11271 TMC4    |
| ENSACAG00000011144 | 11272 TG      |
| ENSACAG00000004745 | 11273 DQX1    |
| ENSACAG00000003254 | 11274 SPON1   |
| ENSACAG00000020271 | 11275 5S_rRNA |
| ENSACAG00000022907 | 11276         |
| ENSACAG00000005127 | 11277 GRK7    |
| ENSACAG00000015608 | 11278 TLX3    |
| ENSACAG00000000249 | 11279 FOXO6   |
| ENSACAG00000028039 | 11280 GNA14   |
| ENSACAG00000002129 | 11281 DEF6    |
| ENSACAG00000009014 | 11282 EPT1    |
| ENSACAG00000002594 | 11283 THEGL   |
| ENSACAG00000010043 | 11284         |
| ENSACAG00000021957 | 11285         |
| ENSACAG00000009657 | 11286         |
| ENSACAG00000001418 | 11287 RNF17   |
| ENSACAG00000015623 | 11288 NOS2    |
| ENSACAG00000000559 | 11289         |
| ENSACAG00000009285 | 11290 BOLL    |
| ENSACAG00000009292 | 11291 CALR3   |
| ENSACAG00000013560 | 11292         |
| ENSACAG00000008482 | 11293 RFX7    |
| ENSACAG00000000543 | 11294         |
| ENSACAG00000003390 | 11295 NHLRC1  |
| ENSACAG00000009736 | 11296 RINL    |

|                    |               |
|--------------------|---------------|
| ENSACAG00000017849 | 11297 HSF2BP  |
| ENSACAG00000021287 | 11298 SCARNA2 |
| ENSACAG00000013404 | 11299 SYN2    |
| ENSACAG00000028147 | 11300         |
| ENSACAG00000025038 | 11301         |
| ENSACAG00000023197 | 11302         |
| ENSACAG00000010849 | 11303 AGLB3   |
| ENSACAG00000017406 | 11304 EGFR    |
| ENSACAG00000004122 | 11305 RIMS1   |
| ENSACAG00000015836 | 11306 IL12B   |
| ENSACAG00000008423 | 11307 THNSL2  |
| ENSACAG00000028735 | 11308 NMU     |
| ENSACAG00000024787 | 11309         |
| ENSACAG00000003964 | 11310 SPINT2  |
| ENSACAG00000028497 | 11311 TICAM2  |
| ENSACAG00000006180 | 11312 ATP10B  |
| ENSACAG00000017971 | 11313 RGS20   |
| ENSACAG00000024388 | 11314         |
| ENSACAG00000015468 | 11315 ABCA12  |
| ENSACAG00000026778 | 11316         |
| ENSACAG00000028164 | 11317 P2RY11  |
| ENSACAG00000014942 | 11318         |
| ENSACAG00000004275 | 11319 HTR2C   |
| ENSACAG00000008598 | 11320 CDKL2   |
| ENSACAG00000003314 | 11321 LRRN4   |
| ENSACAG00000025862 | 11322         |
| ENSACAG00000009027 | 11323 EFN1    |
| ENSACAG00000006411 | 11324         |
| ENSACAG00000006784 | 11325         |
| ENSACAG00000010688 | 11326 AFF2    |
| ENSACAG00000015216 | 11327 FSCN2   |
| ENSACAG00000001123 | 11328         |
| ENSACAG00000003281 | 11329 CIART   |
| ENSACAG00000009983 | 11330 ABRA    |
| ENSACAG00000007189 | 11331 RHPN2   |
| ENSACAG00000001334 | 11332 ACPP    |
| ENSACAG00000016561 | 11333 CCDC120 |
| ENSACAG00000023555 | 11334         |
| ENSACAG00000000626 | 11335 ARHGEF9 |
| ENSACAG00000006826 | 11336 CCPG1   |
| ENSACAG00000012030 | 11337         |
| ENSACAG00000011962 | 11338 VSIG1   |

|                    |                |
|--------------------|----------------|
| ENSACAG00000008783 | 11339 CDYL2    |
| ENSACAG00000028784 | 11340          |
| ENSACAG00000009739 | 11341 NCAM2    |
| ENSACAG00000014672 | 11342 RIBC2    |
| ENSACAG00000025978 | 11343          |
| ENSACAG00000026003 | 11344          |
| ENSACAG00000017891 | 11345 WDR49    |
| ENSACAG00000017691 | 11346 MYRF     |
| ENSACAG00000010413 | 11347 MAFG     |
| ENSACAG00000014054 | 11348 DOK4     |
| ENSACAG00000003097 | 11349          |
| ENSACAG00000001557 | 11350          |
| ENSACAG00000011575 | 11351 CACNA1B  |
| ENSACAG00000012686 | 11352          |
| ENSACAG00000009488 | 11353 ARHGEF39 |
| ENSACAG00000008359 | 11354 CAMKV    |
| ENSACAG00000029469 | 11355 C16orf58 |
| ENSACAG00000016251 | 11356          |
| ENSACAG00000010393 | 11357 CELSR2   |
| ENSACAG00000015127 | 11358          |
| ENSACAG00000016889 | 11359          |
| ENSACAG00000016400 | 11360 CPB2     |
| ENSACAG00000016022 | 11361 FAM83E   |
| ENSACAG00000008942 | 11362 GCNT4    |
| ENSACAG00000001283 | 11363          |
| ENSACAG00000008272 | 11364 DDC      |
| ENSACAG00000020975 | 11365          |
| ENSACAG00000015157 | 11366 EPS8L2   |
| ENSACAG00000003054 | 11367          |
| ENSACAG00000002981 | 11368 ANKRD16  |
| ENSACAG00000007586 | 11369 STK32C   |
| ENSACAG00000005667 | 11370 MYT1L    |
| ENSACAG00000028730 | 11371          |
| ENSACAG00000018767 | 11372 5S_rRNA  |
| ENSACAG00000010962 | 11373          |
| ENSACAG00000002841 | 11374 BMP6     |
| ENSACAG00000018843 | 11375 5S_rRNA  |
| ENSACAG00000017995 | 11376 LIPG     |
| ENSACAG00000015670 | 11377          |
| ENSACAG00000008255 | 11378 COL19A1  |
| ENSACAG00000009454 | 11379 PLB1     |
| ENSACAG00000014628 | 11380 FSIP1    |

|                    |                |
|--------------------|----------------|
| ENSACAG00000012359 | 11381 LUM      |
| ENSACAG00000017444 | 11382 NTHL1    |
| ENSACAG00000014632 | 11383 SLC4A10  |
| ENSACAG00000004704 | 11384          |
| ENSACAG00000000392 | 11385          |
| ENSACAG00000002778 | 11386 PDE9A    |
| ENSACAG00000003828 | 11387 CBLN2    |
| ENSACAG00000018572 | 11388 5S_rRNA  |
| ENSACAG00000028791 | 11389 SAMD10   |
| ENSACAG00000023681 | 11390 PDZD9    |
| ENSACAG00000023912 | 11391          |
| ENSACAG00000025369 | 11392          |
| ENSACAG00000023969 | 11393          |
| ENSACAG00000010412 | 11394 CCDC148  |
| ENSACAG00000025896 | 11395          |
| ENSACAG00000019351 | 11396          |
| ENSACAG00000014353 | 11397 ACOT11   |
| ENSACAG00000003315 | 11398 HHIP     |
| ENSACAG00000012103 | 11399          |
| ENSACAG00000016165 | 11400 SEMA3E   |
| ENSACAG00000012539 | 11401          |
| ENSACAG00000005654 | 11402 CAMK1G   |
| ENSACAG00000015789 | 11403 ZBTB25   |
| ENSACAG00000010081 | 11404          |
| ENSACAG00000008152 | 11405 CDH6     |
| ENSACAG00000010127 | 11406 ERAL1    |
| ENSACAG00000012625 | 11407 AQP3     |
| ENSACAG00000007471 | 11408 TMPRSS13 |
| ENSACAG00000013820 | 11409 TRAPPC3L |
| ENSACAG00000011204 | 11410 PECAM1   |
| ENSACAG00000013520 | 11411 BEGAIN   |
| ENSACAG00000005158 | 11412 ALS2CL   |
| ENSACAG00000002821 | 11413 THPO     |
| ENSACAG00000006885 | 11414          |
| ENSACAG00000004343 | 11415          |
| ENSACAG00000024632 | 11416          |
| ENSACAG00000007580 | 11417 BAMBI    |
| ENSACAG00000025979 | 11418          |
| ENSACAG00000012718 | 11419 CYP27A1  |
| ENSACAG00000010665 | 11420 RHOB     |
| ENSACAG00000002211 | 11421          |
| ENSACAG00000002080 | 11422 IGFBP7   |



|                    |                |
|--------------------|----------------|
| ENSACAG00000011088 | 11423 RNF32    |
| ENSACAG00000005110 | 11424          |
| ENSACAG00000017225 | 11425          |
| ENSACAG00000016236 | 11426 CDH4     |
| ENSACAG00000029156 | 11427          |
| ENSACAG00000016098 | 11428 DOCK2    |
| ENSACAG00000013650 | 11429          |
| ENSACAG00000004755 | 11430 CNBD2    |
| ENSACAG00000010704 | 11431 ANK2     |
| ENSACAG00000000352 | 11432          |
| ENSACAG00000000676 | 11433 PRADC1   |
| ENSACAG00000028474 | 11434 GDF6     |
| ENSACAG00000008520 | 11435          |
| ENSACAG00000001924 | 11436 DOCK8    |
| ENSACAG00000001082 | 11437 TFPI     |
| ENSACAG00000010390 | 11438 HOXA4    |
| ENSACAG00000011969 | 11439 STC1     |
| ENSACAG00000029143 | 11440 EMCN     |
| ENSACAG00000014207 | 11441 EPS8     |
| ENSACAG00000008909 | 11442          |
| ENSACAG00000016832 | 11443          |
| ENSACAG00000029504 | 11444          |
| ENSACAG00000015180 | 11445 C6orf163 |
| ENSACAG00000015294 | 11446 STK10    |
| ENSACAG00000028977 | 11447          |
| ENSACAG00000014668 | 11448 MTNR1B   |
| ENSACAG00000015479 | 11449 ANKRD45  |
| ENSACAG00000013088 | 11450 PPFIA3   |
| ENSACAG00000001232 | 11451 TEX36    |
| ENSACAG00000011924 | 11452 ARHGAP4  |
| ENSACAG00000015666 | 11453 SH3BP1   |
| ENSACAG00000001353 | 11454 BACE1    |
| ENSACAG00000010925 | 11455          |
| ENSACAG00000010878 | 11456 GMEB1    |
| ENSACAG00000012515 | 11457          |
| ENSACAG00000012957 | 11458          |
| ENSACAG00000013462 | 11459 GJB5     |
| ENSACAG00000001245 | 11460 TDRD5    |
| ENSACAG00000016515 | 11461 IGF1     |
| ENSACAG00000025000 | 11462 RHBDD3   |
| ENSACAG00000017749 | 11463          |
| ENSACAG00000013324 | 11464 NR2F1    |

|                    |               |
|--------------------|---------------|
| ENSACAG00000005900 | 11465 HID1    |
| ENSACAG00000000470 | 11466 IRG1    |
| ENSACAG00000015779 | 11467 FZD1    |
| ENSACAG00000000304 | 11468 LAMA3   |
| ENSACAG00000003721 | 11469         |
| ENSACAG00000028606 | 11470         |
| ENSACAG00000005952 | 11471 LRRC3B  |
| ENSACAG00000029658 | 11472         |
| ENSACAG00000029560 | 11473 NKAIN3  |
| ENSACAG00000001570 | 11474         |
| ENSACAG00000016945 | 11475 GLP2R   |
| ENSACAG00000028195 | 11476         |
| ENSACAG00000007695 | 11477 OTP     |
| ENSACAG00000029182 | 11478         |
| ENSACAG00000011246 | 11479 PFKFB1  |
| ENSACAG00000010567 | 11480 GLRA2   |
| ENSACAG00000005097 | 11481         |
| ENSACAG00000006154 | 11482 MICU3   |
| ENSACAG00000028516 | 11483         |
| ENSACAG00000007871 | 11484 GATA1   |
| ENSACAG00000010731 | 11485 HPSE    |
| ENSACAG00000014619 | 11486 OTC     |
| ENSACAG00000026550 | 11487 SNORD60 |
| ENSACAG00000000146 | 11488 PCSK9   |
| ENSACAG00000016687 | 11489 SFN     |
| ENSACAG00000010705 | 11490         |
| ENSACAG00000028927 | 11491         |
| ENSACAG00000012258 | 11492 ITGA2B  |
| ENSACAG00000000555 | 11493         |
| ENSACAG00000008932 | 11494         |
| ENSACAG00000003161 | 11495         |
| ENSACAG00000011917 | 11496 LIX1    |
| ENSACAG00000003791 | 11497 PGM2L1  |
| ENSACAG00000007474 | 11498 CACNA1I |
| ENSACAG00000020999 | 11499 PRLH    |
| ENSACAG00000009250 | 11500 COL15A1 |
| ENSACAG00000001576 | 11501 GPR139  |
| ENSACAG00000009631 | 11502         |
| ENSACAG00000022389 | 11503         |
| ENSACAG00000005581 | 11504         |
| ENSACAG00000000118 | 11505         |
| ENSACAG00000009253 | 11506 SLC1A3  |

|                    |                    |
|--------------------|--------------------|
| ENSACAG00000017780 | 11507 FREM1        |
| ENSACAG00000002774 | 11508              |
| ENSACAG00000011042 | 11509 CCDC105      |
| ENSACAG00000008664 | 11510              |
| ENSACAG00000020709 | 11511 5S_rRNA      |
| ENSACAG00000012095 | 11512              |
| ENSACAG00000012862 | 11513              |
| ENSACAG00000006837 | 11514 SCRN2        |
| ENSACAG00000016835 | 11515 DECR2        |
| ENSACAG00000027707 | 11516              |
| ENSACAG00000010850 | 11517 CASKIN1      |
| ENSACAG00000011432 | 11518 HAPLN1       |
| ENSACAG00000028363 | 11519              |
| ENSACAG00000022438 | 11520              |
| ENSACAG00000011814 | 11521 ITIH6        |
| ENSACAG00000011525 | 11522              |
| ENSACAG00000019371 | 11523 aca-let-7c-2 |
| ENSACAG00000007183 | 11524 CAMKK1       |
| ENSACAG00000006845 | 11525 GABRA4       |
| ENSACAG00000025946 | 11526 C19orf68     |
| ENSACAG00000029478 | 11527 ATP6V1G3     |
| ENSACAG00000011634 | 11528 NHS          |
| ENSACAG00000027495 | 11529 VPS11        |
| ENSACAG00000017142 | 11530 TMEM63C      |
| ENSACAG00000003242 | 11531 UPB1         |
| ENSACAG00000011573 | 11532 LRRC43       |
| ENSACAG00000024351 | 11533              |
| ENSACAG00000022686 | 11534              |
| ENSACAG00000028326 | 11535              |
| ENSACAG00000015467 | 11536              |
| ENSACAG00000001133 | 11537 HS6ST3       |
| ENSACAG00000000173 | 11538 DDX25        |
| ENSACAG00000011101 | 11539 RHOF         |
| ENSACAG00000006443 | 11540 SLC7A2       |
| ENSACAG00000011411 | 11541              |
| ENSACAG00000026054 | 11542              |
| ENSACAG00000016156 | 11543 PAPLN        |
| ENSACAG00000001632 | 11544 TET3         |
| ENSACAG00000004210 | 11545 PEX5L        |
| ENSACAG00000021990 | 11546              |
| ENSACAG00000000762 | 11547              |
| ENSACAG00000007131 | 11548              |

|                    |                |
|--------------------|----------------|
| ENSACAG00000025634 | 11549          |
| ENSACAG00000010855 | 11550 HOXC10   |
| ENSACAG00000008414 | 11551 ANKDD1B  |
| ENSACAG00000028331 | 11552          |
| ENSACAG00000013111 | 11553 YJEFN3   |
| ENSACAG00000012445 | 11554 GIT1     |
| ENSACAG00000029626 | 11555 TRAPPC2L |
| ENSACAG00000007177 | 11556 GNAO1    |
| ENSACAG00000005304 | 11557          |
| ENSACAG00000015668 | 11558          |
| ENSACAG00000013388 | 11559 NPY      |
| ENSACAG00000023669 | 11560 RTN4R    |
| ENSACAG00000012227 | 11561 RBPMS2   |
| ENSACAG00000003401 | 11562 PRDM6    |
| ENSACAG00000017736 | 11563 IFT172   |
| ENSACAG00000008362 | 11564          |
| ENSACAG00000004898 | 11565          |
| ENSACAG00000024130 | 11566          |
| ENSACAG00000010092 | 11567          |
| ENSACAG00000026820 | 11568 CSF3     |
| ENSACAG00000000905 | 11569          |
| ENSACAG00000019128 | 11570 5S_rRNA  |
| ENSACAG00000025485 | 11571          |
| ENSACAG00000025615 | 11572          |
| ENSACAG00000010958 | 11573          |
| ENSACAG00000009268 | 11574 PLCL1    |
| ENSACAG00000016489 | 11575 FMNL1    |
| ENSACAG00000029427 | 11576 AS3MT    |
| ENSACAG00000011738 | 11577 IL17RB   |
| ENSACAG00000024834 | 11578          |
| ENSACAG00000026192 | 11579 FGF3     |
| ENSACAG00000002630 | 11580 DCT      |
| ENSACAG00000018946 | 11581 5S_rRNA  |
| ENSACAG00000025593 | 11582          |
| ENSACAG00000013096 | 11583 CYP39A1  |
| ENSACAG00000012559 | 11584 REP15    |
| ENSACAG00000028572 | 11585          |
| ENSACAG00000004871 | 11586 CEL      |
| ENSACAG00000009122 | 11587 KIAA1211 |
| ENSACAG00000003075 | 11588 TANGO6   |
| ENSACAG00000004010 | 11589 GABPB2   |
| ENSACAG00000009824 | 11590          |

|                    |                    |
|--------------------|--------------------|
| ENSACAG00000025930 | 11591 FITM1        |
| ENSACAG00000007558 | 11592              |
| ENSACAG00000009521 | 11593              |
| ENSACAG00000010065 | 11594 HSPA12A      |
| ENSACAG00000011637 | 11595 NUP210L      |
| ENSACAG00000015413 | 11596 CRACR2B      |
| ENSACAG00000011340 | 11597 CACNG5       |
| ENSACAG00000007725 | 11598              |
| ENSACAG00000014675 | 11599 TEKT5        |
| ENSACAG00000017449 | 11600              |
| ENSACAG00000012306 | 11601              |
| ENSACAG00000025516 | 11602 aca-mir-2970 |
| ENSACAG00000002159 | 11603 AQP4         |
| ENSACAG00000009579 | 11604 MARCH4       |
| ENSACAG00000005157 | 11605 FZD7         |
| ENSACAG00000016702 | 11606 DNAJC5B      |
| ENSACAG00000009154 | 11607              |
| ENSACAG00000015524 | 11608 FRMD5        |
| ENSACAG00000016044 | 11609              |
| ENSACAG00000003972 | 11610 ABCC2        |
| ENSACAG00000008938 | 11611 PPP1R13L     |
| ENSACAG00000009256 | 11612 TSPAN15      |
| ENSACAG00000014513 | 11613 TRPA1        |
| ENSACAG00000017224 | 11614 GNL2         |
| ENSACAG00000000867 | 11615 FBXO48       |
| ENSACAG00000007083 | 11616 TMEM232      |
| ENSACAG00000017211 | 11617 NOXRED1      |
| ENSACAG00000022262 | 11618 ZNF703       |
| ENSACAG00000023646 | 11619              |
| ENSACAG00000005223 | 11620 ST8SIA6      |
| ENSACAG00000000097 | 11621 ST3GAL4      |
| ENSACAG00000029542 | 11622              |
| ENSACAG00000009885 | 11623              |
| ENSACAG00000010335 | 11624              |
| ENSACAG00000028899 | 11625              |
| ENSACAG00000028790 | 11626 TMEM218      |
| ENSACAG00000006887 | 11627 LRRC46       |
| ENSACAG00000007385 | 11628              |
| ENSACAG00000001834 | 11629              |
| ENSACAG00000003826 | 11630 AKNA         |
| ENSACAG00000028681 | 11631 BANF2        |
| ENSACAG00000015290 | 11632 MTERF2       |

|                    |                   |
|--------------------|-------------------|
| ENSACAG00000004301 | 11633             |
| ENSACAG00000025231 | 11634             |
| ENSACAG00000020191 | 11635             |
| ENSACAG00000029219 | 11636             |
| ENSACAG00000011572 | 11637 TMEM51      |
| ENSACAG00000008530 | 11638 ADTRP       |
| ENSACAG00000015987 | 11639 RCVRN       |
| ENSACAG00000007038 | 11640 ATP10D      |
| ENSACAG00000005202 | 11641 DLGAP2      |
| ENSACAG00000007420 | 11642 DENND6B     |
| ENSACAG00000024706 | 11643 FAM163B     |
| ENSACAG00000010629 | 11644             |
| ENSACAG00000014872 | 11645             |
| ENSACAG00000003203 | 11646 RNF144B     |
| ENSACAG00000029065 | 11647 TNFSF8      |
| ENSACAG00000008631 | 11648             |
| ENSACAG00000003171 | 11649             |
| ENSACAG00000014194 | 11650 COL4A1      |
| ENSACAG00000028978 | 11651             |
| ENSACAG00000019654 | 11652             |
| ENSACAG00000006013 | 11653 CLVS1       |
| ENSACAG00000026866 | 11654             |
| ENSACAG00000006623 | 11655             |
| ENSACAG00000029128 | 11656 ECT2L       |
| ENSACAG00000008958 | 11657 ALK         |
| ENSACAG00000005899 | 11658             |
| ENSACAG00000019574 | 11659 aca-mir-142 |
| ENSACAG00000006709 | 11660 MCF2L       |
| ENSACAG00000010633 | 11661 GHR         |
| ENSACAG00000018337 | 11662 aca-mir-145 |
| ENSACAG00000003789 | 11663 NETO1       |
| ENSACAG00000006249 | 11664 MYT1        |
| ENSACAG00000029666 | 11665             |
| ENSACAG00000022990 | 11666             |
| ENSACAG00000014869 | 11667             |
| ENSACAG00000014272 | 11668 PTPRQ       |
| ENSACAG00000000877 | 11669 SCRN1       |
| ENSACAG00000029080 | 11670 SBK3        |
| ENSACAG00000005234 | 11671 SORCS3      |
| ENSACAG00000029105 | 11672             |
| ENSACAG00000008074 | 11673 TMEM55B     |
| ENSACAG00000008833 | 11674 KIAA1456    |

|                    |                |
|--------------------|----------------|
| ENSACAG00000022592 | 11675 MYL6B    |
| ENSACAG00000014614 | 11676 SDK2     |
| ENSACAG00000005358 | 11677 DSCAM    |
| ENSACAG00000001552 | 11678 NLRC3    |
| ENSACAG00000000099 | 11679 ADRA1D   |
| ENSACAG00000002128 | 11680 BRINP3   |
| ENSACAG00000021140 | 11681 EGFLAM   |
| ENSACAG00000010251 | 11682          |
| ENSACAG00000004322 | 11683 FAM124B  |
| ENSACAG00000005570 | 11684 WDR54    |
| ENSACAG00000014692 | 11685 GABRG2   |
| ENSACAG00000003958 | 11686 FRRS1    |
| ENSACAG00000006517 | 11687          |
| ENSACAG00000028808 | 11688          |
| ENSACAG00000024877 | 11689          |
| ENSACAG00000014205 | 11690 OTOGL    |
| ENSACAG00000000288 | 11691 GP1BB    |
| ENSACAG00000017109 | 11692 HNRNPA0  |
| ENSACAG00000013287 | 11693 BDKRB2   |
| ENSACAG00000000861 | 11694 ACAD8    |
| ENSACAG00000020919 | 11695 5S_rRNA  |
| ENSACAG00000012836 | 11696          |
| ENSACAG00000007842 | 11697 IRF2BP1  |
| ENSACAG00000007881 | 11698          |
| ENSACAG00000003070 | 11699 HMHA1    |
| ENSACAG00000017144 | 11700          |
| ENSACAG00000016182 | 11701 BARX2    |
| ENSACAG00000029127 | 11702          |
| ENSACAG00000015310 | 11703 COL26A1  |
| ENSACAG00000015768 | 11704          |
| ENSACAG00000002874 | 11705 FRS3     |
| ENSACAG00000027904 | 11706 BANK1    |
| ENSACAG00000011051 | 11707 IL1RAPL2 |
| ENSACAG00000012582 | 11708 ADAM11   |
| ENSACAG00000013723 | 11709 TM6SF1   |
| ENSACAG00000020716 | 11710 5S_rRNA  |
| ENSACAG00000012810 | 11711 SOSTDC1  |
| ENSACAG00000013357 | 11712 AKR1D1   |
| ENSACAG00000000624 | 11713 FAM160B2 |
| ENSACAG00000019423 | 11714 5S_rRNA  |
| ENSACAG00000002598 | 11715 HOPX     |
| ENSACAG00000010604 | 11716          |

|                    |                |
|--------------------|----------------|
| ENSACAG00000029028 | 11717          |
| ENSACAG00000004064 | 11718 TOR4A    |
| ENSACAG00000000280 | 11719          |
| ENSACAG00000003965 | 11720          |
| ENSACAG00000001625 | 11721 SLC16A9  |
| ENSACAG00000014410 | 11722 CRISPLD2 |
| ENSACAG00000012706 | 11723 ZFP64    |
| ENSACAG00000008498 | 11724 GPR158   |
| ENSACAG00000006214 | 11725          |
| ENSACAG00000010814 | 11726 KCNQ3    |
| ENSACAG00000001851 | 11727 EPB41L1  |
| ENSACAG00000002557 | 11728 CDKL3    |
| ENSACAG00000012328 | 11729 WDR6     |
| ENSACAG00000016675 | 11730 SLC6A2   |
| ENSACAG00000009535 | 11731 CATSPERB |
| ENSACAG00000015327 | 11732 AXIN1    |
| ENSACAG00000017882 | 11733 KLHL14   |
| ENSACAG00000027137 | 11734          |
| ENSACAG00000016952 | 11735 HSD11B1L |
| ENSACAG00000029118 | 11736          |
| ENSACAG00000005756 | 11737 LAMB3    |
| ENSACAG00000011214 | 11738 HPD      |
| ENSACAG00000011836 | 11739          |
| ENSACAG00000007200 | 11740 CLIC3    |
| ENSACAG00000011516 | 11741 WBSCR27  |
| ENSACAG00000000082 | 11742          |
| ENSACAG00000023791 | 11743          |
| ENSACAG00000016070 | 11744 FGF4     |
| ENSACAG00000005420 | 11745 FAM150B  |
| ENSACAG00000028313 | 11746          |
| ENSACAG00000008555 | 11747          |
| ENSACAG00000011628 | 11748          |
| ENSACAG00000022335 | 11749          |
| ENSACAG00000006257 | 11750 EB13     |
| ENSACAG00000026928 | 11751          |
| ENSACAG00000013850 | 11752 SESN3    |
| ENSACAG00000022005 | 11753 CACFD1   |
| ENSACAG00000010967 | 11754 HOXA1    |
| ENSACAG00000028030 | 11755          |
| ENSACAG00000028564 | 11756          |
| ENSACAG00000006320 | 11757          |
| ENSACAG00000011527 | 11758 EML2     |



|                    |                |
|--------------------|----------------|
| ENSACAG00000016506 | 11759 APOBEC2  |
| ENSACAG00000016002 | 11760 MATN2    |
| ENSACAG00000007105 | 11761 EDF1     |
| ENSACAG00000015896 | 11762 RASIP1   |
| ENSACAG00000015322 | 11763 ADGRG1   |
| ENSACAG00000014581 | 11764 SYT13    |
| ENSACAG00000013094 | 11765 HSF4     |
| ENSACAG00000007716 | 11766 CAPS2    |
| ENSACAG00000001585 | 11767 NTN3     |
| ENSACAG00000003190 | 11768 RASL11A  |
| ENSACAG00000012374 | 11769 DAPP1    |
| ENSACAG00000007957 | 11770 GUCA1C   |
| ENSACAG00000003211 | 11771          |
| ENSACAG00000000966 | 11772 SLC38A11 |
| ENSACAG00000006384 | 11773          |
| ENSACAG00000005929 | 11774          |
| ENSACAG00000006882 | 11775 PAQR4    |
| ENSACAG00000022225 | 11776          |
| ENSACAG00000009879 | 11777 ASCL3    |
| ENSACAG00000006534 | 11778 SKAP1    |
| ENSACAG00000017919 | 11779          |
| ENSACAG00000007457 | 11780 TDRKH    |
| ENSACAG00000000228 | 11781          |
| ENSACAG00000007232 | 11782 ABCA2    |
| ENSACAG00000013701 | 11783 BMPR1B   |
| ENSACAG00000016201 | 11784 C8orf34  |
| ENSACAG00000028287 | 11785          |
| ENSACAG00000004130 | 11786 CORO2A   |
| ENSACAG00000013741 | 11787 ACSS1    |
| ENSACAG00000029495 | 11788          |
| ENSACAG00000029209 | 11789 SPATA6L  |
| ENSACAG00000017372 | 11790 KIAA1958 |
| ENSACAG00000021519 | 11791 5S_rRNA  |
| ENSACAG00000029062 | 11792 MPPED1   |
| ENSACAG00000013762 | 11793 SLC35C2  |
| ENSACAG00000029620 | 11794 PTN      |
| ENSACAG00000003941 | 11795 SLC4A11  |
| ENSACAG00000002032 | 11796 FRMD3    |
| ENSACAG00000012086 | 11797 KHK      |
| ENSACAG00000029506 | 11798          |
| ENSACAG00000010364 | 11799 HOXA5    |
| ENSACAG00000015040 | 11800 SCARA3   |

|                    |                |
|--------------------|----------------|
| ENSACAG00000024804 | 11801          |
| ENSACAG00000015592 | 11802 NLRC5    |
| ENSACAG00000016282 | 11803          |
| ENSACAG00000015348 | 11804 SERPINC1 |
| ENSACAG00000012014 | 11805          |
| ENSACAG00000009963 | 11806 KIF21B   |
| ENSACAG00000013686 | 11807          |
| ENSACAG00000008769 | 11808 SUGP1    |
| ENSACAG00000022280 | 11809          |
| ENSACAG00000002530 | 11810 LRFN2    |
| ENSACAG00000025114 | 11811          |
| ENSACAG00000011301 | 11812 CDH20    |
| ENSACAG00000009902 | 11813 KIT      |
| ENSACAG00000029584 | 11814 TSGA10IP |
| ENSACAG00000014070 | 11815 PIWIL4   |
| ENSACAG00000006649 | 11816 MLKL     |
| ENSACAG00000021351 | 11817 5S_rRNA  |
| ENSACAG00000011017 | 11818 SAXO2    |
| ENSACAG00000005312 | 11819 SIPA1    |
| ENSACAG00000013989 | 11820 ADAMTS7  |
| ENSACAG00000014216 | 11821 OVOL2    |
| ENSACAG00000013263 | 11822          |
| ENSACAG00000017961 | 11823 ST18     |
| ENSACAG00000010432 | 11824          |
| ENSACAG00000006800 | 11825 CNTF     |
| ENSACAG00000010107 | 11826 BBS10    |
| ENSACAG00000007085 | 11827 PRSS53   |
| ENSACAG00000009276 | 11828 TACR2    |
| ENSACAG00000005251 | 11829 TFAP2B   |
| ENSACAG00000008997 | 11830 LEPR     |
| ENSACAG00000016443 | 11831 PPP1R42  |
| ENSACAG00000012609 | 11832 MAP7D2   |
| ENSACAG00000004780 | 11833 SYTL3    |
| ENSACAG00000021595 | 11834 5S_rRNA  |
| ENSACAG00000011259 | 11835 IL16     |
| ENSACAG00000004098 | 11836 RORC     |
| ENSACAG00000008331 | 11837 FAM159A  |
| ENSACAG00000011862 | 11838          |
| ENSACAG00000014389 | 11839 PEX11B   |
| ENSACAG00000029585 | 11840          |
| ENSACAG00000015105 | 11841 TSPAN10  |
| ENSACAG00000011272 | 11842 C3AR1    |

|                    |                |
|--------------------|----------------|
| ENSACAG00000002834 | 11843 KIAA1841 |
| ENSACAG00000011607 | 11844          |
| ENSACAG00000009621 | 11845 NFU1     |
| ENSACAG00000013359 | 11846 MRC2     |
| ENSACAG00000011347 | 11847          |
| ENSACAG00000007826 | 11848          |
| ENSACAG00000027437 | 11849          |
| ENSACAG00000024611 | 11850          |
| ENSACAG00000024129 | 11851 5S_rRNA  |
| ENSACAG00000004012 | 11852 RABEPK   |
| ENSACAG00000015060 | 11853 RTN1     |
| ENSACAG00000013579 | 11854 ABHD11   |
| ENSACAG00000013667 | 11855 PNLDC1   |
| ENSACAG00000010184 | 11856 PLA2G3   |
| ENSACAG00000015858 | 11857 NTN5     |
| ENSACAG00000017376 | 11858 ERFF1    |
| ENSACAG00000007710 | 11859 GALNT15  |
| ENSACAG00000007271 | 11860 ADGB     |
| ENSACAG00000004429 | 11861          |
| ENSACAG00000000402 | 11862 FAM84A   |
| ENSACAG00000017243 | 11863 SCN8A    |
| ENSACAG00000006169 | 11864          |
| ENSACAG00000025945 | 11865          |
| ENSACAG00000010869 | 11866 TM7SF2   |
| ENSACAG00000006902 | 11867 C8B      |
| ENSACAG00000016891 | 11868 GGH      |
| ENSACAG00000005612 | 11869 C2orf81  |
| ENSACAG00000026515 | 11870          |
| ENSACAG00000010013 | 11871 CLDND1   |
| ENSACAG00000029535 | 11872          |
| ENSACAG00000000267 | 11873 GREB1    |
| ENSACAG00000017152 | 11874          |
| ENSACAG00000026834 | 11875          |
| ENSACAG00000014489 | 11876          |
| ENSACAG00000005962 | 11877 C9orf24  |
| ENSACAG00000000721 | 11878          |
| ENSACAG00000011853 | 11879          |
| ENSACAG00000013097 | 11880 PIPOX    |
| ENSACAG00000007259 | 11881 MYO1A    |
| ENSACAG00000027821 | 11882          |
| ENSACAG00000014456 | 11883 FBLN1    |
| ENSACAG00000006499 | 11884 HOXB4    |

|                    |               |
|--------------------|---------------|
| ENSACAG00000010469 | 11885 GRIN2B  |
| ENSACAG00000013115 | 11886         |
| ENSACAG00000007137 | 11887 TRIL    |
| ENSACAG00000026035 | 11888         |
| ENSACAG00000003277 | 11889 PDE10A  |
| ENSACAG00000007305 | 11890 GRM1    |
| ENSACAG00000018729 | 11891 5S_rRNA |
| ENSACAG00000002331 | 11892 GRIA3   |
| ENSACAG00000014385 | 11893 WNT7B   |
| ENSACAG00000013358 | 11894         |
| ENSACAG00000022573 | 11895         |
| ENSACAG00000010853 | 11896 ZNHIT2  |
| ENSACAG00000007524 | 11897 PHEX    |
| ENSACAG00000002143 | 11898 L3MBTL1 |
| ENSACAG00000023109 | 11899 PHYHD1  |
| ENSACAG00000029500 | 11900         |
| ENSACAG00000019702 | 11901 5S_rRNA |
| ENSACAG00000010823 | 11902 EBF2    |
| ENSACAG00000017659 | 11903 APC2    |
| ENSACAG00000013742 | 11904 NETO2   |
| ENSACAG00000011737 | 11905         |
| ENSACAG00000000986 | 11906 SCTR    |
| ENSACAG00000013172 | 11907 FAM81B  |
| ENSACAG00000006223 | 11908         |
| ENSACAG00000021658 | 11909 5S_rRNA |
| ENSACAG00000029632 | 11910         |
| ENSACAG00000016335 | 11911 DNAH17  |
| ENSACAG00000001843 | 11912 GLP1R   |
| ENSACAG00000029048 | 11913         |
| ENSACAG00000003933 | 11914 TTC29   |
| ENSACAG00000001590 | 11915 CCDC27  |
| ENSACAG00000015076 | 11916 DRD4    |
| ENSACAG00000009524 | 11917 ESYT3   |
| ENSACAG00000025749 | 11918 QSOX2   |
| ENSACAG00000003633 | 11919 COL8A2  |
| ENSACAG00000013851 | 11920 GRXCR2  |
| ENSACAG00000012268 | 11921         |
| ENSACAG00000008895 | 11922 VWA5B2  |
| ENSACAG00000007475 | 11923 ZNF532  |
| ENSACAG00000009627 | 11924 DLK2    |
| ENSACAG00000029468 | 11925         |
| ENSACAG00000026189 | 11926         |

|                    |                      |
|--------------------|----------------------|
| ENSACAG00000002195 | 11927 MAP4K1         |
| ENSACAG00000015454 | 11928 CRABP2         |
| ENSACAG00000008849 | 11929 RAB33A         |
| ENSACAG00000015126 | 11930                |
| ENSACAG00000024549 | 11931 PCDHB8         |
| ENSACAG00000024228 | 11932                |
| ENSACAG00000024430 | 11933                |
| ENSACAG00000002462 | 11934 RASGRP4        |
| ENSACAG00000010170 | 11935 CPS1           |
| ENSACAG00000020381 | 11936 aca-mir-425    |
| ENSACAG00000007407 | 11937 GRAP2          |
| ENSACAG00000022613 | 11938 GPSM1          |
| ENSACAG00000000400 | 11939 TMEM256-PLSCR3 |
| ENSACAG00000001320 | 11940                |
| ENSACAG00000023503 | 11941                |
| ENSACAG00000003553 | 11942 CDH17          |
| ENSACAG00000007473 | 11943 TBX20          |
| ENSACAG00000008984 | 11944                |
| ENSACAG00000017151 | 11945 TREH           |
| ENSACAG00000008108 | 11946                |
| ENSACAG00000012275 | 11947 EEF2           |
| ENSACAG00000000129 | 11948 LEXM           |
| ENSACAG00000020444 | 11949                |
| ENSACAG00000004952 | 11950 SFMBT2         |
| ENSACAG00000006559 | 11951 ADGRL4         |
| ENSACAG00000010564 | 11952                |
| ENSACAG00000006110 | 11953                |
| ENSACAG00000024231 | 11954                |
| ENSACAG00000015775 | 11955 CD36           |
| ENSACAG00000013135 | 11956                |
| ENSACAG00000006363 | 11957 TTLL6          |
| ENSACAG00000000740 | 11958                |
| ENSACAG00000014792 | 11959 APCDD1L        |
| ENSACAG00000003248 | 11960                |
| ENSACAG00000011507 | 11961 GPR156         |
| ENSACAG00000012886 | 11962                |
| ENSACAG00000011048 | 11963                |
| ENSACAG00000014360 | 11964                |
| ENSACAG00000006250 | 11965 RAPGEF4        |
| ENSACAG00000003922 | 11966                |
| ENSACAG00000004325 | 11967 XXYLT1         |
| ENSACAG00000011852 | 11968 EARS2          |

|                    |               |
|--------------------|---------------|
| ENSACAG00000013894 | 11969         |
| ENSACAG00000017855 | 11970 RUNX3   |
| ENSACAG00000003855 | 11971         |
| ENSACAG00000012916 | 11972         |
| ENSACAG00000006771 | 11973 PRKAA2  |
| ENSACAG00000004743 | 11974 PTH1R   |
| ENSACAG00000028540 | 11975         |
| ENSACAG00000003724 | 11976 NOVA2   |
| ENSACAG00000004350 | 11977 CYP17A1 |
| ENSACAG00000014257 | 11978         |
| ENSACAG00000011309 | 11979 PLD4    |
| ENSACAG00000003117 | 11980 HAS3    |
| ENSACAG00000002245 | 11981 WDR86   |
| ENSACAG00000008796 | 11982 STARD6  |
| ENSACAG00000010241 | 11983         |
| ENSACAG00000011225 | 11984 KCP     |
| ENSACAG00000005484 | 11985         |
| ENSACAG00000005067 | 11986 TEX26   |
| ENSACAG00000012057 | 11987 KATNAL2 |
| ENSACAG00000026799 | 11988         |
| ENSACAG00000005823 | 11989 HSD11B1 |
| ENSACAG00000014175 | 11990 EML3    |
| ENSACAG00000007426 | 11991 FOSB    |
| ENSACAG00000010478 | 11992         |
| ENSACAG00000005438 | 11993 MYO7B   |
| ENSACAG00000029564 | 11994         |
| ENSACAG00000010650 | 11995 ZBTB45  |
| ENSACAG00000011757 | 11996 PPEF1   |
| ENSACAG00000017568 | 11997 RADIL   |
| ENSACAG00000003812 | 11998 PLXDC1  |
| ENSACAG00000017569 | 11999 TRPC4   |
| ENSACAG00000002454 | 12000 FAM177B |
| ENSACAG00000000030 | 12001 SALL2   |
| ENSACAG00000008733 | 12002 TBATA   |
| ENSACAG00000016117 | 12003         |
| ENSACAG00000001313 | 12004 KLHL17  |
| ENSACAG00000007374 | 12005 GPR179  |
| ENSACAG00000020289 | 12006         |
| ENSACAG00000001472 | 12007 LZTS1   |
| ENSACAG00000013547 | 12008 DLK1    |
| ENSACAG00000010386 | 12009         |
| ENSACAG00000015588 | 12010         |

|                    |                |
|--------------------|----------------|
| ENSACAG00000016975 | 12011 GUCY1A3  |
| ENSACAG00000008684 | 12012          |
| ENSACAG00000017042 | 12013 KLHL23   |
| ENSACAG00000017452 | 12014          |
| ENSACAG00000013338 | 12015          |
| ENSACAG00000010359 | 12016          |
| ENSACAG00000003432 | 12017 WDR64    |
| ENSACAG00000002154 | 12018          |
| ENSACAG00000004527 | 12019 ELAVL4   |
| ENSACAG00000008387 | 12020 CCNB1IP1 |
| ENSACAG00000008690 | 12021          |
| ENSACAG00000008787 | 12022 LYVE1    |
| ENSACAG00000000745 | 12023 FEZ1     |
| ENSACAG00000028922 | 12024          |
| ENSACAG00000027873 | 12025          |
| ENSACAG00000004168 | 12026          |
| ENSACAG00000015404 | 12027 EFCAB9   |
| ENSACAG00000000951 | 12028 LMOD2    |
| ENSACAG00000004928 | 12029 DYDC1    |
| ENSACAG00000023762 | 12030          |
| ENSACAG00000003859 | 12031 TBX18    |
| ENSACAG00000028902 | 12032          |
| ENSACAG00000007446 | 12033          |
| ENSACAG00000025013 | 12034          |
| ENSACAG00000000339 | 12035 NPDC1    |
| ENSACAG00000028715 | 12036          |
| ENSACAG00000008144 | 12037 EFCAB7   |
| ENSACAG00000012122 | 12038 C1QTNF7  |
| ENSACAG00000015689 | 12039 EFCAB6   |
| ENSACAG00000017682 | 12040 PIK3R6   |
| ENSACAG00000028314 | 12041          |
| ENSACAG00000029217 | 12042 SCEL     |
| ENSACAG00000006813 | 12043 KIF5A    |
| ENSACAG00000006031 | 12044 PTK6     |
| ENSACAG00000004972 | 12045 MPP2     |
| ENSACAG00000002722 | 12046 GPRC5B   |
| ENSACAG00000013951 | 12047          |
| ENSACAG00000004712 | 12048          |
| ENSACAG00000007576 | 12049 LRRC27   |
| ENSACAG00000023394 | 12050          |
| ENSACAG00000015008 | 12051 DHRS3    |
| ENSACAG00000022507 | 12052          |

|                    |                |
|--------------------|----------------|
| ENSACAG00000002743 | 12053 HUNK     |
| ENSACAG00000011942 | 12054 C3orf20  |
| ENSACAG00000006894 | 12055 HCLS1    |
| ENSACAG00000008304 | 12056 SYCE2    |
| ENSACAG00000016298 | 12057 PCK1     |
| ENSACAG00000027839 | 12058 5S_rRNA  |
| ENSACAG00000015841 | 12059 KCNIP1   |
| ENSACAG00000011926 | 12060 SLC5A2   |
| ENSACAG00000014915 | 12061 LANCL3   |
| ENSACAG00000006299 | 12062 AK9      |
| ENSACAG00000000536 | 12063          |
| ENSACAG00000011875 | 12064 SMYD3    |
| ENSACAG00000001936 | 12065 KCNA4    |
| ENSACAG00000022801 | 12066          |
| ENSACAG00000013280 | 12067 GRIP2    |
| ENSACAG00000011695 | 12068 CHDH     |
| ENSACAG00000023891 | 12069          |
| ENSACAG00000010619 | 12070 TIFA     |
| ENSACAG00000028712 | 12071 C16orf71 |
| ENSACAG00000027804 | 12072 TBRG1    |
| ENSACAG00000001664 | 12073          |
| ENSACAG00000010598 | 12074 ADCY8    |
| ENSACAG00000029215 | 12075          |
| ENSACAG00000029590 | 12076 GTSF1L   |
| ENSACAG00000011090 | 12077 ALAS2    |
| ENSACAG00000010063 | 12078 C1orf106 |
| ENSACAG00000025579 | 12079 SYN1     |
| ENSACAG00000024914 | 12080 KIAA2012 |
| ENSACAG00000003654 | 12081 GEM      |
| ENSACAG00000010752 | 12082 GABBR1   |
| ENSACAG00000015355 | 12083 RFX4     |
| ENSACAG00000015870 | 12084 AP1M2    |
| ENSACAG00000007821 | 12085 NAT8L    |
| ENSACAG00000006946 | 12086 C9orf16  |
| ENSACAG00000009274 | 12087 GAS2L1   |
| ENSACAG00000028544 | 12088          |
| ENSACAG00000004342 | 12089 SLC2A8   |
| ENSACAG00000004034 | 12090 EPAS1    |
| ENSACAG00000010657 | 12091 PIWIL2   |
| ENSACAG00000029563 | 12092          |
| ENSACAG00000010582 | 12093 MFSD3    |
| ENSACAG00000012120 | 12094 MIER2    |



|                     |               |
|---------------------|---------------|
| ENSACAG00000004961  | 12095 RNASEL  |
| ENSACAG00000003722  | 12096         |
| ENSACAG00000003099  | 12097 SERTAD1 |
| ENSACAG000000013711 | 12098         |
| ENSACAG00000002281  | 12099 CUX2    |
| ENSACAG00000001101  | 12100 SSC4D   |
| ENSACAG000000009954 | 12101 LAMA1   |
| ENSACAG000000008124 | 12102 FANCA   |
| ENSACAG000000017377 | 12103         |
| ENSACAG000000007094 | 12104 FKBP6   |
| ENSACAG000000001996 | 12105 CLDN10  |
| ENSACAG000000027411 | 12106 BTBD18  |
| ENSACAG000000016574 | 12107 UPK1A   |
| ENSACAG000000000680 | 12108 BARX1   |
| ENSACAG000000010900 | 12109 IGSF21  |
| ENSACAG000000014241 | 12110         |
| ENSACAG000000023103 | 12111         |
| ENSACAG000000013627 | 12112 FABP12  |
| ENSACAG000000016916 | 12113 MAPK13  |
| ENSACAG000000015429 | 12114 SH3TC2  |
| ENSACAG000000017367 | 12115 HTRA1   |
| ENSACAG000000025744 | 12116 GABRR2  |
| ENSACAG000000002096 | 12117 CCDC110 |
| ENSACAG000000024007 | 12118         |
| ENSACAG000000000560 | 12119 CDK15   |
| ENSACAG000000016147 | 12120 IP6K3   |
| ENSACAG000000000455 | 12121         |
| ENSACAG000000001716 | 12122 SLC11A1 |
| ENSACAG000000003461 | 12123         |
| ENSACAG000000009304 | 12124 SULT1B1 |
| ENSACAG000000010267 | 12125 P2RY6   |
| ENSACAG000000029277 | 12126         |
| ENSACAG000000017932 | 12127 ASIC2   |
| ENSACAG000000002527 | 12128 SYBU    |
| ENSACAG000000027551 | 12129         |
| ENSACAG000000011000 | 12130 CNPY1   |
| ENSACAG000000002991 | 12131 ENTPD3  |
| ENSACAG000000001121 | 12132 GJD4    |
| ENSACAG000000010348 | 12133 SETMAR  |
| ENSACAG000000020108 | 12134 SNORD93 |
| ENSACAG000000005625 | 12135         |
| ENSACAG000000028751 | 12136         |

|                    |                |
|--------------------|----------------|
| ENSACAG00000006846 | 12137 ABAT     |
| ENSACAG00000014142 | 12138 ASIC4    |
| ENSACAG00000005841 | 12139          |
| ENSACAG00000006378 | 12140          |
| ENSACAG00000014868 | 12141 VSTM2B   |
| ENSACAG00000004312 | 12142          |
| ENSACAG00000003998 | 12143 SNAP91   |
| ENSACAG00000008514 | 12144 FGF13    |
| ENSACAG00000006492 | 12145          |
| ENSACAG00000013269 | 12146 DPF1     |
| ENSACAG00000016451 | 12147 KIAA0556 |
| ENSACAG00000027510 | 12148          |
| ENSACAG00000002318 | 12149 COL11A1  |
| ENSACAG00000003071 | 12150 ADAMTS20 |
| ENSACAG00000013513 | 12151 HYI      |
| ENSACAG00000013190 | 12152 MCTP1    |
| ENSACAG00000006661 | 12153 CORIN    |
| ENSACAG00000005879 | 12154          |
| ENSACAG00000003356 | 12155 PLD5     |
| ENSACAG00000023218 | 12156 MAPK8IP2 |
| ENSACAG00000010820 | 12157 SLC22A23 |
| ENSACAG00000002779 | 12158 CDH1     |
| ENSACAG00000003567 | 12159 TEK2     |
| ENSACAG00000028686 | 12160 CYB561D1 |
| ENSACAG00000029664 | 12161          |
| ENSACAG00000007829 | 12162 MKX      |
| ENSACAG00000023058 | 12163          |
| ENSACAG00000015648 | 12164 LRRC71   |
| ENSACAG00000000008 | 12165          |
| ENSACAG00000016678 | 12166          |
| ENSACAG00000007364 | 12167 COQ4     |
| ENSACAG00000009106 | 12168 ANKFN1   |
| ENSACAG00000005503 | 12169          |
| ENSACAG00000024380 | 12170          |
| ENSACAG00000008163 | 12171 APBB1IP  |
| ENSACAG00000021700 | 12172 5S_rRNA  |
| ENSACAG00000025384 | 12173          |
| ENSACAG00000009283 | 12174          |
| ENSACAG00000001051 | 12175          |
| ENSACAG00000013466 | 12176 MYLK3    |
| ENSACAG00000001975 | 12177 TECPR1   |
| ENSACAG00000008273 | 12178 RHCG     |

|                    |               |
|--------------------|---------------|
| ENSACAG00000012620 | 12179 PLAT    |
| ENSACAG00000014213 | 12180 SLC6A20 |
| ENSACAG00000000565 | 12181 TmprSS9 |
| ENSACAG00000007883 | 12182 LIPE    |
| ENSACAG00000008737 | 12183 PRLR    |
| ENSACAG00000005403 | 12184 KIF9    |
| ENSACAG00000014319 | 12185         |
| ENSACAG00000006427 | 12186 TEC     |
| ENSACAG00000011444 | 12187         |
| ENSACAG00000012787 | 12188 AVIL    |
| ENSACAG00000015692 | 12189 ACTRT3  |
| ENSACAG00000005926 | 12190 DNAH5   |
| ENSACAG00000014620 | 12191 SLC29A4 |
| ENSACAG00000009347 | 12192 ST8SIA3 |
| ENSACAG00000005739 | 12193         |
| ENSACAG00000005530 | 12194 TACR1   |
| ENSACAG00000003164 | 12195 KYNU    |
| ENSACAG00000023612 | 12196         |
| ENSACAG00000024514 | 12197         |
| ENSACAG00000016376 | 12198 RGS22   |
| ENSACAG00000009924 | 12199 STOX1   |
| ENSACAG00000014901 | 12200         |
| ENSACAG00000026198 | 12201         |
| ENSACAG00000004127 | 12202 KCNAB3  |
| ENSACAG00000007089 | 12203         |
| ENSACAG00000017439 | 12204 MFAP5   |
| ENSACAG00000016006 | 12205         |
| ENSACAG00000026272 | 12206         |
| ENSACAG00000016611 | 12207 FBXO46  |
| ENSACAG00000014093 | 12208 STX2    |
| ENSACAG00000003686 | 12209 PHACTR3 |
| ENSACAG00000028600 | 12210         |
| ENSACAG00000028436 | 12211         |
| ENSACAG00000001487 | 12212 TMC5    |
| ENSACAG00000010857 | 12213 CKMT2   |
| ENSACAG00000016903 | 12214 RGL3    |
| ENSACAG00000012191 | 12215 COL22A1 |
| ENSACAG00000024077 | 12216         |
| ENSACAG00000028982 | 12217         |
| ENSACAG00000008858 | 12218 NCALD   |
| ENSACAG00000014840 | 12219 SPTBN5  |
| ENSACAG00000002275 | 12220 COLQ    |

|                     |                |
|---------------------|----------------|
| ENSACAG00000000482  | 12221 PCDH17   |
| ENSACAG00000000252  | 12222 TLL1     |
| ENSACAG000000009652 | 12223          |
| ENSACAG000000018972 | 12224 5S_rRNA  |
| ENSACAG000000013428 | 12225 PKP3     |
| ENSACAG000000009922 | 12226 MYOZ1    |
| ENSACAG000000009909 | 12227          |
| ENSACAG000000013637 | 12228          |
| ENSACAG000000002352 | 12229 SLC25A4  |
| ENSACAG000000003614 | 12230 KDM8     |
| ENSACAG000000013660 | 12231 NFASC    |
| ENSACAG000000006769 | 12232          |
| ENSACAG000000007887 | 12233 ABHD3    |
| ENSACAG000000029018 | 12234 IL6      |
| ENSACAG000000003481 | 12235 MROH6    |
| ENSACAG000000004686 | 12236          |
| ENSACAG000000016455 | 12237          |
| ENSACAG000000001027 | 12238 PTPRU    |
| ENSACAG000000026880 | 12239          |
| ENSACAG000000008314 | 12240          |
| ENSACAG000000020906 | 12241 5S_rRNA  |
| ENSACAG000000005593 | 12242 CACNB2   |
| ENSACAG000000009114 | 12243          |
| ENSACAG000000008509 | 12244 DACT2    |
| ENSACAG000000004169 | 12245          |
| ENSACAG000000014039 | 12246 ZSWIM3   |
| ENSACAG000000001491 | 12247 ADAMTS19 |
| ENSACAG000000004439 | 12248 FES      |
| ENSACAG000000028370 | 12249 GPSM3    |
| ENSACAG000000018889 | 12250 5S_rRNA  |
| ENSACAG000000000550 | 12251 RBM11    |
| ENSACAG000000017255 | 12252 STPG1    |
| ENSACAG000000015823 | 12253 GPR160   |
| ENSACAG000000008357 | 12254 SNPH     |
| ENSACAG000000020921 | 12255 5S_rRNA  |
| ENSACAG000000013607 | 12256 SYT12    |
| ENSACAG000000000091 | 12257 KIRREL3  |
| ENSACAG000000004094 | 12258 INHBB    |
| ENSACAG000000001813 | 12259 HEY2     |
| ENSACAG000000014268 | 12260 DZANK1   |
| ENSACAG000000004402 | 12261          |
| ENSACAG000000012466 | 12262 KCTD21   |

|                    |               |
|--------------------|---------------|
| ENSACAG00000015080 | 12263         |
| ENSACAG00000007240 | 12264 CYP2J2  |
| ENSACAG00000011164 | 12265 VAX2    |
| ENSACAG00000012412 | 12266 TINAGL1 |
| ENSACAG00000009734 | 12267 AFAP1L2 |
| ENSACAG00000013034 | 12268 GLMP    |
| ENSACAG00000025380 | 12269         |
| ENSACAG00000001855 | 12270         |
| ENSACAG00000003989 | 12271         |
| ENSACAG00000013177 | 12272 HGF     |
| ENSACAG00000016181 | 12273 CDH10   |
| ENSACAG00000006458 | 12274 HNF1B   |
| ENSACAG00000009318 | 12275 BRS3    |
| ENSACAG00000022429 | 12276         |
| ENSACAG00000026577 | 12277 IL9R    |
| ENSACAG00000004792 | 12278 RITA1   |
| ENSACAG00000028116 | 12279         |
| ENSACAG00000007027 | 12280 FFAR4   |
| ENSACAG00000009936 | 12281 TSPAN32 |
| ENSACAG00000028956 | 12282 CD83    |
| ENSACAG00000022350 | 12283 GCNT2   |
| ENSACAG00000005049 | 12284         |
| ENSACAG00000029155 | 12285         |
| ENSACAG00000015351 | 12286         |
| ENSACAG00000006228 | 12287 LPAR5   |
| ENSACAG00000023439 | 12288         |
| ENSACAG00000000541 | 12289 HGH1    |
| ENSACAG00000004024 | 12290 CFAP70  |
| ENSACAG00000011452 | 12291 EREG    |
| ENSACAG00000024702 | 12292 SMAGP   |
| ENSACAG00000014725 | 12293 LYSMD1  |
| ENSACAG00000007855 | 12294 NOS3    |
| ENSACAG00000008557 | 12295 THSD4   |
| ENSACAG00000000007 | 12296 NRCAM   |
| ENSACAG00000001184 | 12297         |
| ENSACAG00000000548 | 12298 SLC37A2 |
| ENSACAG00000011653 | 12299         |
| ENSACAG00000024147 | 12300         |
| ENSACAG00000015284 | 12301 VRK3    |
| ENSACAG00000023422 | 12302         |
| ENSACAG00000023690 | 12303         |
| ENSACAG00000010667 | 12304 LRRC24  |

|                    |                |
|--------------------|----------------|
| ENSACAG00000007469 | 12305 KIFC2    |
| ENSACAG00000011661 | 12306 RAI2     |
| ENSACAG00000015330 | 12307 FAM81A   |
| ENSACAG00000029222 | 12308          |
| ENSACAG00000029098 | 12309 FAM216B  |
| ENSACAG00000021108 | 12310          |
| ENSACAG00000025859 | 12311          |
| ENSACAG00000009178 | 12312 DUSP9    |
| ENSACAG00000013870 | 12313 LPL      |
| ENSACAG00000008510 | 12314 ZNF503   |
| ENSACAG00000017493 | 12315 HMX2     |
| ENSACAG00000000362 | 12316 PLEKHG2  |
| ENSACAG00000015755 | 12317 CASQ1    |
| ENSACAG00000023682 | 12318          |
| ENSACAG00000003586 | 12319 IL21R    |
| ENSACAG00000008344 | 12320 RGSL1    |
| ENSACAG00000013772 | 12321          |
| ENSACAG00000005443 | 12322 TPO      |
| ENSACAG00000023927 | 12323          |
| ENSACAG00000000493 | 12324 NCKAP5   |
| ENSACAG00000014442 | 12325 BRINP2   |
| ENSACAG00000000311 | 12326          |
| ENSACAG00000015984 | 12327 RMI2     |
| ENSACAG00000009322 | 12328 ALDH1A3  |
| ENSACAG00000007594 | 12329 ZNF385A  |
| ENSACAG00000027342 | 12330          |
| ENSACAG00000028076 | 12331          |
| ENSACAG00000017469 | 12332 STAC2    |
| ENSACAG00000009108 | 12333 BSN      |
| ENSACAG00000016998 | 12334 TTC25    |
| ENSACAG00000016694 | 12335 PI16     |
| ENSACAG00000015340 | 12336 GANC     |
| ENSACAG00000025637 | 12337          |
| ENSACAG00000015644 | 12338 IL17B    |
| ENSACAG00000008561 | 12339 GCM1     |
| ENSACAG00000012802 | 12340 C11orf70 |
| ENSACAG00000008831 | 12341 DNAJC6   |
| ENSACAG00000029307 | 12342          |
| ENSACAG00000013956 | 12343          |
| ENSACAG00000000690 | 12344          |
| ENSACAG00000015195 | 12345 TNFSF14  |
| ENSACAG00000017436 | 12346 ALDOB    |

|                      |                 |
|----------------------|-----------------|
| ENSACAG00000009432   | 12347 CRACR2A   |
| ENSACAG00000008864   | 12348           |
| ENSACAG00000001655   | 12349 TLR7      |
| ENSACAG000000016792  | 12350 TMC6      |
| ENSACAG00000009378   | 12351 TMEM116   |
| ENSACAG00000004876   | 12352 BCAN      |
| ENSACAG000000016093  | 12353 RBFOX3    |
| ENSACAG00000007301   | 12354           |
| ENSACAG00000006251   | 12355           |
| ENSACAG00000007315   | 12356 CDHR4     |
| ENSACAG000000021034  | 12357           |
| ENSACAG00000007256   | 12358 CAMK4     |
| ENSACAG00000005942   | 12359 ASMT      |
| ENSACAG00000006473   | 12360 CRYAB     |
| ENSACAG000000017071  | 12361 ESRRB     |
| ENSACAG00000000880   | 12362 SERPINB10 |
| ENSACAG000000001367  | 12363 ARHGAP6   |
| ENSACAG000000008454  | 12364 CYP1B1    |
| ENSACAG000000007559  | 12365 HSD3B7    |
| ENSACAG000000007401  | 12366           |
| ENSACAG00000000566   | 12367 DNAH6     |
| ENSACAG000000006501  | 12368 ATP6AP1   |
| ENSACAG000000001563  | 12369           |
| ENSACAG000000001540  | 12370 UPF3A     |
| ENSACAG0000000027163 | 12371           |
| ENSACAG000000000603  | 12372           |
| ENSACAG000000018967  | 12373 5S_rRNA   |
| ENSACAG000000010906  | 12374 HOXC8     |
| ENSACAG000000006614  | 12375 KIF1A     |
| ENSACAG000000003299  | 12376 XYLT1     |
| ENSACAG000000002892  | 12377 HOGA1     |
| ENSACAG000000015922  | 12378 CYTH4     |
| ENSACAG000000022711  | 12379           |
| ENSACAG000000004341  | 12380 TMEM249   |
| ENSACAG000000009224  | 12381 XPNPEP2   |
| ENSACAG000000007792  | 12382 INADL     |
| ENSACAG000000025482  | 12383           |
| ENSACAG000000012337  | 12384 FAM71E1   |
| ENSACAG000000002086  | 12385 PAK7      |
| ENSACAG000000016647  | 12386           |
| ENSACAG000000007160  | 12387 RGS5      |
| ENSACAG000000014801  | 12388 SLC43A2   |

|                    |                |
|--------------------|----------------|
| ENSACAG00000020817 | 12389 snoU13   |
| ENSACAG00000016949 | 12390 PHF24    |
| ENSACAG00000023526 | 12391          |
| ENSACAG00000014850 | 12392 CHODL    |
| ENSACAG00000009564 | 12393 TMEM171  |
| ENSACAG00000001227 | 12394          |
| ENSACAG00000027245 | 12395          |
| ENSACAG00000014463 | 12396          |
| ENSACAG00000024911 | 12397          |
| ENSACAG00000009950 | 12398 LGALS4   |
| ENSACAG00000000276 | 12399 CCDC183  |
| ENSACAG00000000787 | 12400 DLL3     |
| ENSACAG00000000227 | 12401 ESAM     |
| ENSACAG00000013030 | 12402 CLIC5    |
| ENSACAG00000025491 | 12403          |
| ENSACAG00000007277 | 12404 RTN4RL2  |
| ENSACAG00000001793 | 12405          |
| ENSACAG00000007774 | 12406 ZFAND4   |
| ENSACAG00000011674 | 12407 SSPN     |
| ENSACAG00000012194 | 12408 MTTTP    |
| ENSACAG00000014100 | 12409 LDLRAD1  |
| ENSACAG00000010992 | 12410 ITGAL    |
| ENSACAG00000016302 | 12411 CPA6     |
| ENSACAG00000011549 | 12412 ELFN1    |
| ENSACAG00000001164 | 12413 RLTPR    |
| ENSACAG00000017769 | 12414 VWCE     |
| ENSACAG00000002699 | 12415 TECTA    |
| ENSACAG00000005821 | 12416          |
| ENSACAG00000002815 | 12417 ANKRD33B |
| ENSACAG00000017290 | 12418 RUNDC3A  |
| ENSACAG00000029514 | 12419          |
| ENSACAG00000003630 | 12420          |
| ENSACAG00000022944 | 12421          |
| ENSACAG00000013343 | 12422 MARCH10  |
| ENSACAG00000004175 | 12423 CYB5R2   |
| ENSACAG00000014759 | 12424 SNCG     |
| ENSACAG00000009262 | 12425          |
| ENSACAG00000015979 | 12426          |
| ENSACAG00000029410 | 12427          |
| ENSACAG00000012298 | 12428 MAP3K15  |
| ENSACAG00000003628 | 12429          |
| ENSACAG00000012053 | 12430          |



|                    |                 |
|--------------------|-----------------|
| ENSACAG00000015988 | 12431           |
| ENSACAG00000013978 | 12432           |
| ENSACAG00000024414 | 12433           |
| ENSACAG00000003649 | 12434 FGF11     |
| ENSACAG00000009485 | 12435 CCDC157   |
| ENSACAG00000000305 | 12436 11-Mar    |
| ENSACAG00000012491 | 12437           |
| ENSACAG00000001112 | 12438           |
| ENSACAG00000017472 | 12439 IFITM5    |
| ENSACAG00000003156 | 12440 KIAA1549L |
| ENSACAG00000027884 | 12441           |
| ENSACAG00000013525 | 12442 PTPRN     |
| ENSACAG00000012011 | 12443 MARVELD3  |
| ENSACAG00000015034 | 12444 TNN       |
| ENSACAG00000017678 | 12445 NME8      |
| ENSACAG00000010837 | 12446 ADGRL1    |
| ENSACAG00000002274 | 12447 MYO7A     |
| ENSACAG00000011629 | 12448           |
| ENSACAG00000005730 | 12449           |
| ENSACAG00000005662 | 12450 CA8       |
| ENSACAG00000010326 | 12451           |
| ENSACAG00000013031 | 12452 IKBKE     |
| ENSACAG00000014051 | 12453 MMP15     |
| ENSACAG00000007254 | 12454           |
| ENSACAG00000003036 | 12455 HINT2     |
| ENSACAG00000007043 | 12456 RBP4      |
| ENSACAG00000003980 | 12457 PPP1R14A  |
| ENSACAG00000015082 | 12458 OGDHL     |
| ENSACAG00000008827 | 12459 OPN1SW    |
| ENSACAG00000017137 | 12460 SYT5      |
| ENSACAG00000011763 | 12461 RELL2     |
| ENSACAG00000020418 | 12462 5S_rRNA   |
| ENSACAG00000025128 | 12463           |
| ENSACAG00000004523 | 12464 EFCAB2    |
| ENSACAG00000022344 | 12465 OCLN      |
| ENSACAG00000014786 | 12466           |
| ENSACAG00000014308 | 12467 GADL1     |
| ENSACAG00000028850 | 12468           |
| ENSACAG00000008182 | 12469 SPAG17    |
| ENSACAG00000023100 | 12470           |
| ENSACAG00000026165 | 12471           |
| ENSACAG00000016332 | 12472 TMEM143   |

|                    |                |
|--------------------|----------------|
| ENSACAG00000005746 | 12473 LRRC52   |
| ENSACAG00000003478 | 12474          |
| ENSACAG00000027560 | 12475          |
| ENSACAG00000005054 | 12476          |
| ENSACAG00000023808 | 12477          |
| ENSACAG00000015554 | 12478 TCTEX1D4 |
| ENSACAG00000002678 | 12479          |
| ENSACAG00000010639 | 12480 GCGR     |
| ENSACAG00000015801 | 12481 PACSIN1  |
| ENSACAG00000014827 | 12482          |
| ENSACAG00000013075 | 12483 NFATC2   |
| ENSACAG00000009230 | 12484 NFATC4   |
| ENSACAG00000015370 | 12485 SVOP     |
| ENSACAG00000010640 | 12486 MYLK     |
| ENSACAG00000012115 | 12487 FAM135B  |
| ENSACAG00000003626 | 12488          |
| ENSACAG00000002875 | 12489 TEX43    |
| ENSACAG00000001381 | 12490 CFAP126  |
| ENSACAG00000004560 | 12491 IQCD     |
| ENSACAG00000013844 | 12492 GRID2IP  |
| ENSACAG00000007698 | 12493 DNAJC30  |
| ENSACAG00000010578 | 12494 PRRT1    |
| ENSACAG00000005090 | 12495 ERBB3    |
| ENSACAG00000002238 | 12496          |
| ENSACAG00000024739 | 12497          |
| ENSACAG00000008311 | 12498 SLC26A8  |
| ENSACAG00000029154 | 12499          |
| ENSACAG00000018491 | 12500 7SK      |
| ENSACAG00000025371 | 12501          |
| ENSACAG00000000132 | 12502 GRHL1    |
| ENSACAG00000005586 | 12503 ESRRG    |
| ENSACAG00000017453 | 12504 WNT5A    |
| ENSACAG00000013303 | 12505 TMEM106A |
| ENSACAG00000008782 | 12506          |
| ENSACAG00000017294 | 12507 GRIK3    |
| ENSACAG00000003405 | 12508 TSHB     |
| ENSACAG00000004266 | 12509          |
| ENSACAG00000016173 | 12510          |
| ENSACAG00000029470 | 12511 C15orf52 |
| ENSACAG00000024788 | 12512          |
| ENSACAG00000014973 | 12513          |
| ENSACAG00000017592 | 12514 PLCZ1    |

|                    |                      |
|--------------------|----------------------|
| ENSACAG00000026260 | 12515                |
| ENSACAG00000005383 | 12516 CFAP61         |
| ENSACAG00000001318 | 12517                |
| ENSACAG00000018301 | 12518 aca-mir-130a-2 |
| ENSACAG00000027048 | 12519 PTX4           |
| ENSACAG00000010987 | 12520 RAD51C         |
| ENSACAG00000005205 | 12521 RORB           |
| ENSACAG00000012335 | 12522 AXDND1         |
| ENSACAG00000010307 | 12523                |
| ENSACAG00000011296 | 12524 EMB            |
| ENSACAG00000010917 | 12525 HOXC6          |
| ENSACAG00000010438 | 12526                |
| ENSACAG00000011122 | 12527 SGIP1          |
| ENSACAG00000004741 | 12528 SV2B           |
| ENSACAG00000004393 | 12529 GLDC           |
| ENSACAG00000001380 | 12530                |
| ENSACAG00000003363 | 12531 SCNN1D         |
| ENSACAG00000010449 | 12532                |
| ENSACAG00000026525 | 12533                |
| ENSACAG00000003809 | 12534 MAP3K11        |
| ENSACAG00000019947 | 12535 5S_rRNA        |
| ENSACAG00000015646 | 12536 LRRD1          |
| ENSACAG00000004493 | 12537 CILP           |
| ENSACAG00000020939 | 12538                |
| ENSACAG00000028907 | 12539                |
| ENSACAG00000006732 | 12540                |
| ENSACAG00000001038 | 12541 SCN3A          |
| ENSACAG00000006147 | 12542                |
| ENSACAG00000007785 | 12543 ARMC4          |
| ENSACAG00000027417 | 12544 IQCJ           |
| ENSACAG00000025668 | 12545                |
| ENSACAG00000008459 | 12546 FABP1          |
| ENSACAG00000007932 | 12547 JAKMIP3        |
| ENSACAG00000015383 | 12548 PTCH2          |
| ENSACAG00000001879 | 12549 LMX1B          |
| ENSACAG00000005136 | 12550 COL17A1        |
| ENSACAG00000020837 | 12551 U1             |
| ENSACAG00000000765 | 12552 PCNXL2         |
| ENSACAG00000010061 | 12553 C8orf74        |
| ENSACAG00000004970 | 12554 RGS16          |
| ENSACAG00000013016 | 12555 APBB3          |
| ENSACAG00000010148 | 12556 C9             |

|                    |                 |
|--------------------|-----------------|
| ENSACAG00000005750 | 12557           |
| ENSACAG00000028881 | 12558           |
| ENSACAG00000003002 | 12559 AMER1     |
| ENSACAG00000005196 | 12560 NOX3      |
| ENSACAG00000004606 | 12561 CCDC36    |
| ENSACAG00000022351 | 12562 DYX1C1    |
| ENSACAG00000001258 | 12563 UFSP1     |
| ENSACAG00000012052 | 12564 ANK1      |
| ENSACAG00000029316 | 12565           |
| ENSACAG00000006705 | 12566 ZBTB47    |
| ENSACAG00000024267 | 12567 PRDM13    |
| ENSACAG00000026012 | 12568           |
| ENSACAG00000022713 | 12569 SPATA2L   |
| ENSACAG00000004676 | 12570 MPP3      |
| ENSACAG00000027663 | 12571 IL23R     |
| ENSACAG00000000522 | 12572 VWF       |
| ENSACAG00000001149 | 12573           |
| ENSACAG00000020276 | 12574 5S_rRNA   |
| ENSACAG00000000761 | 12575 SLC35F4   |
| ENSACAG00000029694 | 12576 SAMD13    |
| ENSACAG00000008198 | 12577           |
| ENSACAG00000027677 | 12578           |
| ENSACAG00000017558 | 12579           |
| ENSACAG00000014095 | 12580 ARHGAP40  |
| ENSACAG00000006934 | 12581           |
| ENSACAG00000016910 | 12582 MYO1F     |
| ENSACAG00000004230 | 12583 SERPINA12 |
| ENSACAG00000021914 | 12584 5S_rRNA   |
| ENSACAG00000023842 | 12585           |
| ENSACAG00000011319 | 12586 PTPN20    |
| ENSACAG00000029030 | 12587           |
| ENSACAG00000005931 | 12588 IRF6      |
| ENSACAG00000017616 | 12589 ZBBX      |
| ENSACAG00000012017 | 12590 ANO4      |
| ENSACAG00000011529 | 12591           |
| ENSACAG00000016388 | 12592 PDZRN4    |
| ENSACAG00000013890 | 12593 LTK       |
| ENSACAG00000010437 | 12594           |
| ENSACAG00000010435 | 12595 CCDC64B   |
| ENSACAG00000002572 | 12596           |
| ENSACAG00000009931 | 12597 PHGDH     |
| ENSACAG00000015976 | 12598 MTHFSD    |

|                    |                |
|--------------------|----------------|
| ENSACAG00000026315 | 12599          |
| ENSACAG00000023205 | 12600          |
| ENSACAG00000006182 | 12601 PPP1R3E  |
| ENSACAG00000006718 | 12602 PPP1R14C |
| ENSACAG00000007062 | 12603          |
| ENSACAG00000007860 | 12604 ATP6V1B1 |
| ENSACAG00000013784 | 12605          |
| ENSACAG00000029197 | 12606          |
| ENSACAG00000013391 | 12607 SLC4A9   |
| ENSACAG00000005578 | 12608          |
| ENSACAG00000001762 | 12609          |
| ENSACAG00000001405 | 12610 CHL1     |
| ENSACAG00000002441 | 12611 CHD5     |
| ENSACAG00000007879 | 12612 TLN2     |
| ENSACAG00000007084 | 12613 YIPF7    |
| ENSACAG00000022691 | 12614          |
| ENSACAG00000015099 | 12615 DNAH10   |
| ENSACAG00000014621 | 12616 GPR176   |
| ENSACAG00000026249 | 12617          |
| ENSACAG00000028014 | 12618          |
| ENSACAG00000002704 | 12619 DLL1     |
| ENSACAG00000024680 | 12620          |
| ENSACAG00000008052 | 12621 KCNG4    |
| ENSACAG00000013066 | 12622 DNAAF1   |
| ENSACAG00000023959 | 12623          |
| ENSACAG00000002063 | 12624 SCN2A    |
| ENSACAG00000001900 | 12625 RAP1GAP  |
| ENSACAG00000008123 | 12626 FOXJ1    |
| ENSACAG00000008901 | 12627 SPEF2    |
| ENSACAG00000011513 | 12628 LINGO1   |
| ENSACAG00000002388 | 12629 CHRNA2   |
| ENSACAG00000026028 | 12630          |
| ENSACAG00000029134 | 12631          |
| ENSACAG00000009042 | 12632 MAST1    |
| ENSACAG00000011353 | 12633          |
| ENSACAG00000008725 | 12634 TMEM145  |
| ENSACAG00000008944 | 12635 SPAG6    |
| ENSACAG00000002597 | 12636 PHF1     |
| ENSACAG00000008846 | 12637 OXSM     |
| ENSACAG00000017636 | 12638 ARHGAP44 |
| ENSACAG00000004346 | 12639 NOP9     |
| ENSACAG00000028786 | 12640          |

|                     |                |
|---------------------|----------------|
| ENSACAG00000002198  | 12641          |
| ENSACAG00000003283  | 12642 LRRC3C   |
| ENSACAG00000001441  | 12643 SERTAD4  |
| ENSACAG000000017241 | 12644          |
| ENSACAG000000006132 | 12645          |
| ENSACAG000000029595 | 12646 FAM19A4  |
| ENSACAG000000022003 | 12647          |
| ENSACAG000000012843 | 12648          |
| ENSACAG000000012478 | 12649 TMC1     |
| ENSACAG000000013010 | 12650 PAK3     |
| ENSACAG000000007531 | 12651 TPH2     |
| ENSACAG000000024431 | 12652          |
| ENSACAG000000022519 | 12653          |
| ENSACAG000000015373 | 12654 DAO      |
| ENSACAG000000010443 | 12655 MYPN     |
| ENSACAG000000004816 | 12656 LRRC75A  |
| ENSACAG000000013970 | 12657 CPTP     |
| ENSACAG000000013011 | 12658 RFESD    |
| ENSACAG000000007868 | 12659 WDR97    |
| ENSACAG000000000336 | 12660 TRPC7    |
| ENSACAG000000026645 | 12661          |
| ENSACAG000000027210 | 12662          |
| ENSACAG000000029375 | 12663          |
| ENSACAG000000003483 | 12664 DLL4     |
| ENSACAG000000001626 | 12665 RGS9     |
| ENSACAG000000025835 | 12666          |
| ENSACAG000000003229 | 12667 CFAP45   |
| ENSACAG000000029242 | 12668          |
| ENSACAG000000009762 | 12669          |
| ENSACAG000000026535 | 12670          |
| ENSACAG000000012204 | 12671          |
| ENSACAG000000005842 | 12672 GYG2     |
| ENSACAG000000003727 | 12673 C18orf63 |
| ENSACAG000000008404 | 12674 KLHL31   |
| ENSACAG000000005165 | 12675 CFAP43   |
| ENSACAG000000004501 | 12676          |
| ENSACAG000000003194 | 12677 LONRF3   |
| ENSACAG000000021143 | 12678 RGS18    |
| ENSACAG000000000458 | 12679 LYPD1    |
| ENSACAG000000012856 | 12680          |
| ENSACAG000000002298 | 12681          |
| ENSACAG000000024893 | 12682 NDFIP1   |

|                    |                |
|--------------------|----------------|
| ENSACAG00000010121 | 12683 CCDC69   |
| ENSACAG00000026891 | 12684          |
| ENSACAG00000021710 | 12685 U4       |
| ENSACAG00000009904 | 12686          |
| ENSACAG00000028462 | 12687          |
| ENSACAG00000009702 | 12688          |
| ENSACAG00000003056 | 12689 ABCG1    |
| ENSACAG00000003415 | 12690 AZIN2    |
| ENSACAG00000006485 | 12691          |
| ENSACAG00000014276 | 12692 GINS1    |
| ENSACAG00000007359 | 12693 ZBTB39   |
| ENSACAG00000009410 | 12694 ONECUT2  |
| ENSACAG00000006610 | 12695 MYH15    |
| ENSACAG00000019303 | 12696 5S_rRNA  |
| ENSACAG00000019111 | 12697 5S_rRNA  |
| ENSACAG00000016641 | 12698 CMYA5    |
| ENSACAG00000002273 | 12699 PDZD3    |
| ENSACAG00000009886 | 12700 SLITRK5  |
| ENSACAG00000028317 | 12701          |
| ENSACAG00000004358 | 12702 PHLDB3   |
| ENSACAG00000026240 | 12703          |
| ENSACAG00000016816 | 12704 HEBP2    |
| ENSACAG00000016711 | 12705 SLC13A3  |
| ENSACAG00000023116 | 12706          |
| ENSACAG00000007188 | 12707 OLFM1    |
| ENSACAG00000009473 | 12708 IDO2     |
| ENSACAG00000011292 | 12709          |
| ENSACAG00000016356 | 12710          |
| ENSACAG00000011538 | 12711 FAM214B  |
| ENSACAG00000013874 | 12712 C1orf116 |
| ENSACAG00000005693 | 12713 SLC5A9   |
| ENSACAG00000025801 | 12714          |
| ENSACAG00000029480 | 12715          |
| ENSACAG00000017262 | 12716 GRHL3    |
| ENSACAG00000018718 | 12717 7SK      |
| ENSACAG00000009615 | 12718 BGN      |
| ENSACAG00000003210 | 12719          |
| ENSACAG00000007546 | 12720 CLSTN3   |
| ENSACAG00000005604 | 12721 ASB14    |
| ENSACAG00000013779 | 12722 COL27A1  |
| ENSACAG00000014365 | 12723 WNT6     |
| ENSACAG00000016171 | 12724 NRL      |

|                     |                 |
|---------------------|-----------------|
| ENSACAG00000001555  | 12725           |
| ENSACAG00000001686  | 12726 NKAIN2    |
| ENSACAG000000023986 | 12727 EFCAB13   |
| ENSACAG000000008883 | 12728 CHGA      |
| ENSACAG000000016046 | 12729 CLDN11    |
| ENSACAG000000029308 | 12730 KRT23     |
| ENSACAG000000007786 | 12731 GATA6     |
| ENSACAG000000012642 | 12732 SLC26A9   |
| ENSACAG000000004607 | 12733 PCBP3     |
| ENSACAG000000007841 | 12734           |
| ENSACAG000000007712 | 12735 TAT       |
| ENSACAG000000014735 | 12736 MIB2      |
| ENSACAG000000025834 | 12737           |
| ENSACAG000000001272 | 12738 PSCA      |
| ENSACAG000000000737 | 12739 PKD2L1    |
| ENSACAG000000020898 | 12740 5S_rRNA   |
| ENSACAG000000015207 | 12741 NPFFR1    |
| ENSACAG000000011112 | 12742 PRSS56    |
| ENSACAG000000006357 | 12743           |
| ENSACAG000000013720 | 12744 TMEM8B    |
| ENSACAG000000004836 | 12745 NGFR      |
| ENSACAG000000022617 | 12746 PMFBP1    |
| ENSACAG000000007069 | 12747 PDE6C     |
| ENSACAG000000028456 | 12748           |
| ENSACAG000000004771 | 12749 C17orf105 |
| ENSACAG000000029315 | 12750           |
| ENSACAG000000021363 | 12751 7SK       |
| ENSACAG000000010015 | 12752           |
| ENSACAG000000013712 | 12753 RUSC2     |
| ENSACAG000000017942 | 12754 PPM1J     |
| ENSACAG000000007568 | 12755 ANKUB1    |
| ENSACAG000000029064 | 12756 TRAC      |
| ENSACAG000000003447 | 12757           |
| ENSACAG000000009176 | 12758 ODF1      |
| ENSACAG000000010960 | 12759 AMIGO1    |
| ENSACAG000000008696 | 12760 HORMAD1   |
| ENSACAG000000007156 | 12761 FBXW5     |
| ENSACAG000000007342 | 12762           |
| ENSACAG000000017875 | 12763 CXorf36   |
| ENSACAG000000028473 | 12764           |
| ENSACAG000000016526 | 12765 NOS1      |
| ENSACAG000000021974 | 12766           |



|                    |               |
|--------------------|---------------|
| ENSACAG00000002657 | 12767 SIRT4   |
| ENSACAG00000026405 | 12768         |
| ENSACAG00000012188 | 12769 FRMPD1  |
| ENSACAG00000021267 | 12770 5S_rRNA |
| ENSACAG00000012079 | 12771 SEMA3G  |
| ENSACAG00000024971 | 12772         |
| ENSACAG00000027006 | 12773         |
| ENSACAG00000011092 | 12774 PTH2R   |
| ENSACAG00000010135 | 12775 NRAP    |
| ENSACAG00000017599 | 12776 PLEKHO1 |
| ENSACAG00000021938 | 12777         |
| ENSACAG00000016107 | 12778         |
| ENSACAG00000017205 | 12779         |
| ENSACAG00000017739 | 12780 FSCN3   |
| ENSACAG00000012089 | 12781         |
| ENSACAG00000019100 | 12782 7SK     |
| ENSACAG00000014963 | 12783 TYR     |
| ENSACAG00000014273 | 12784         |
| ENSACAG00000017832 | 12785         |
| ENSACAG00000026925 | 12786 PRR5    |
| ENSACAG00000012091 | 12787 SLC46A1 |
| ENSACAG00000009386 | 12788         |
| ENSACAG00000012632 | 12789         |
| ENSACAG00000025246 | 12790         |
| ENSACAG00000004389 | 12791 GATM    |
| ENSACAG00000027725 | 12792 XRR1    |
| ENSACAG00000029052 | 12793         |
| ENSACAG00000008322 | 12794         |
| ENSACAG00000008425 | 12795 FAIM2   |
| ENSACAG00000023660 | 12796 ATXN1L  |
| ENSACAG00000009563 | 12797 MDH1B   |
| ENSACAG00000012213 | 12798         |
| ENSACAG00000012124 | 12799 SHANK1  |
| ENSACAG00000007998 | 12800 MEGF8   |
| ENSACAG00000010862 | 12801 TDRD9   |
| ENSACAG00000005301 | 12802 VILL    |
| ENSACAG00000022493 | 12803         |
| ENSACAG00000007968 | 12804 MORC1   |
| ENSACAG00000009900 | 12805 ESRP2   |
| ENSACAG00000006412 | 12806 HOXB9   |
| ENSACAG00000005117 | 12807 SLC10A1 |
| ENSACAG00000013532 | 12808 ANO9    |

|                    |                |
|--------------------|----------------|
| ENSACAG00000002589 | 12809 PLCD4    |
| ENSACAG00000029119 | 12810          |
| ENSACAG00000016852 | 12811          |
| ENSACAG00000000576 | 12812          |
| ENSACAG00000005672 | 12813 NBEAL2   |
| ENSACAG00000009210 | 12814 ATP2B3   |
| ENSACAG00000003377 | 12815 OVGP1    |
| ENSACAG00000017160 | 12816 PPCDC    |
| ENSACAG00000027734 | 12817          |
| ENSACAG00000017130 | 12818 CXCR5    |
| ENSACAG00000002568 | 12819 SLC7A10  |
| ENSACAG00000014120 | 12820 FAP      |
| ENSACAG00000008407 | 12821 RAD21L1  |
| ENSACAG00000007164 | 12822 TSPAN8   |
| ENSACAG00000022204 | 12823          |
| ENSACAG00000012739 | 12824 SCN4A    |
| ENSACAG00000000531 | 12825 SEPT12   |
| ENSACAG00000014639 | 12826 SMYD4    |
| ENSACAG00000014460 | 12827 ARHGAP25 |
| ENSACAG00000008098 | 12828 DNASE1L1 |
| ENSACAG00000005213 | 12829 COL9A3   |
| ENSACAG00000025667 | 12830          |
| ENSACAG00000007976 | 12831 S100Z    |
| ENSACAG00000029408 | 12832          |
| ENSACAG00000026237 | 12833 SHISA6   |
| ENSACAG00000016649 | 12834 GAD1     |
| ENSACAG00000001304 | 12835 SLIT2    |
| ENSACAG00000010253 | 12836 SLC27A4  |
| ENSACAG00000017040 | 12837 ACP5     |
| ENSACAG00000024496 | 12838          |
| ENSACAG00000028481 | 12839          |
| ENSACAG00000026819 | 12840          |
| ENSACAG00000001160 | 12841 TTC6     |
| ENSACAG00000006645 | 12842 FGL1     |
| ENSACAG00000007529 | 12843 UPP2     |
| ENSACAG00000003469 | 12844          |
| ENSACAG00000013173 | 12845 CRISPLD1 |
| ENSACAG00000004571 | 12846          |
| ENSACAG00000014471 | 12847 NAALAD2  |
| ENSACAG00000014535 | 12848 KIAA0513 |
| ENSACAG00000026782 | 12849 MPND     |
| ENSACAG00000022091 | 12850          |

|                    |                |
|--------------------|----------------|
| ENSACAG00000010892 | 12851 MSH4     |
| ENSACAG00000027314 | 12852 NOTO     |
| ENSACAG00000015842 | 12853          |
| ENSACAG00000001593 | 12854 FAM149A  |
| ENSACAG00000000035 | 12855 SLC6A13  |
| ENSACAG00000029395 | 12856          |
| ENSACAG00000007268 | 12857 CEBPE    |
| ENSACAG00000004037 | 12858 LRFN3    |
| ENSACAG00000007157 | 12859 C10orf90 |
| ENSACAG00000012914 | 12860 SYP      |
| ENSACAG00000003806 | 12861          |
| ENSACAG00000012358 | 12862 DNAH7    |
| ENSACAG00000012051 | 12863          |
| ENSACAG00000007149 | 12864 CAPN14   |
| ENSACAG00000026732 | 12865          |
| ENSACAG00000017418 | 12866 PLPPR1   |
| ENSACAG00000019866 | 12867 5S_rRNA  |
| ENSACAG00000008245 | 12868 KDELR3   |
| ENSACAG00000000812 | 12869 IGHM     |
| ENSACAG00000023330 | 12870          |
| ENSACAG00000028444 | 12871          |
| ENSACAG00000025377 | 12872          |
| ENSACAG00000021144 | 12873 PTPRR    |
| ENSACAG00000010458 | 12874          |
| ENSACAG00000004090 | 12875 CCDC60   |
| ENSACAG00000013078 | 12876 COL28A1  |
| ENSACAG00000028545 | 12877          |
| ENSACAG00000006917 | 12878 F10      |
| ENSACAG00000025865 | 12879 PIAS4    |
| ENSACAG00000012938 | 12880 SLC35D2  |
| ENSACAG00000025300 | 12881          |
| ENSACAG00000024961 | 12882          |
| ENSACAG00000002062 | 12883 FHL5     |
| ENSACAG00000007510 | 12884          |
| ENSACAG00000006491 | 12885 UCP2     |
| ENSACAG00000002936 | 12886          |
| ENSACAG00000012498 | 12887 CCDC158  |
| ENSACAG00000001910 | 12888          |
| ENSACAG00000028601 | 12889          |
| ENSACAG00000016642 | 12890 WNT3     |
| ENSACAG00000012021 | 12891 WDR72    |
| ENSACAG00000006789 | 12892 SHOX2    |

|                    |                       |
|--------------------|-----------------------|
| ENSACAG00000023176 | 12893                 |
| ENSACAG00000010796 | 12894                 |
| ENSACAG00000013440 | 12895 LGI2            |
| ENSACAG00000011847 | 12896 SPOCD1          |
| ENSACAG00000028036 | 12897                 |
| ENSACAG00000002192 | 12898 LRP2BP          |
| ENSACAG00000005357 | 12899 MYOM3           |
| ENSACAG00000001305 | 12900 LYPD2           |
| ENSACAG00000011408 | 12901 WDR66           |
| ENSACAG00000008960 | 12902                 |
| ENSACAG00000005378 | 12903 NMNAT2          |
| ENSACAG00000025508 | 12904                 |
| ENSACAG00000021952 | 12905                 |
| ENSACAG00000006226 | 12906 ARHGEF33        |
| ENSACAG00000024149 | 12907                 |
| ENSACAG00000028605 | 12908                 |
| ENSACAG00000029332 | 12909                 |
| ENSACAG00000012208 | 12910                 |
| ENSACAG00000012329 | 12911 PLA2R1          |
| ENSACAG00000024978 | 12912 NEURL3          |
| ENSACAG00000020673 | 12913 Telomerase-vert |
| ENSACAG00000014570 | 12914 HTR2A           |
| ENSACAG00000005808 | 12915                 |
| ENSACAG00000007771 | 12916 SIAH3           |
| ENSACAG00000013425 | 12917 SLC25A47        |
| ENSACAG00000014741 | 12918 SMC1B           |
| ENSACAG00000000500 | 12919                 |
| ENSACAG00000003258 | 12920 C6orf118        |
| ENSACAG00000014897 | 12921 LIPM            |
| ENSACAG00000017711 | 12922 IRF4            |
| ENSACAG00000013892 | 12923 WNK4            |
| ENSACAG00000012294 | 12924 PROM1           |
| ENSACAG00000028995 | 12925                 |
| ENSACAG00000017903 | 12926 MAOB            |
| ENSACAG00000002197 | 12927 PSD2            |
| ENSACAG00000021215 | 12928 5S_rRNA         |
| ENSACAG00000008298 | 12929 BTK             |
| ENSACAG00000010141 | 12930 CPNE9           |
| ENSACAG00000029047 | 12931                 |
| ENSACAG00000011437 | 12932 POMC            |
| ENSACAG00000026087 | 12933                 |
| ENSACAG00000015455 | 12934 IL2RG           |

|                    |               |
|--------------------|---------------|
| ENSACAG00000028576 | 12935         |
| ENSACAG00000010994 | 12936         |
| ENSACAG00000009816 | 12937         |
| ENSACAG00000002844 | 12938 SCN1A   |
| ENSACAG00000017771 | 12939 UBXN11  |
| ENSACAG00000005265 | 12940         |
| ENSACAG00000017918 | 12941 MAOA    |
| ENSACAG00000014362 | 12942 GLRA4   |
| ENSACAG00000014622 | 12943         |
| ENSACAG00000012482 | 12944 WNT7A   |
| ENSACAG00000017393 | 12945 TSHR    |
| ENSACAG00000028997 | 12946 PLPP4   |
| ENSACAG00000016325 | 12947 SLC23A1 |
| ENSACAG00000013296 | 12948 PLPP6   |
| ENSACAG00000012125 | 12949         |
| ENSACAG00000010352 | 12950 HABP2   |
| ENSACAG00000011011 | 12951 GRIN3A  |
| ENSACAG00000011603 | 12952 STXBP5L |
| ENSACAG00000014441 | 12953         |
| ENSACAG00000022885 | 12954         |
| ENSACAG00000028976 | 12955 SOWAHD  |
| ENSACAG00000017237 | 12956         |
| ENSACAG00000001538 | 12957         |
| ENSACAG00000015224 | 12958         |
| ENSACAG00000028445 | 12959 C2orf61 |
| ENSACAG00000000604 | 12960 COL7A1  |
| ENSACAG00000004306 | 12961 ITIH2   |
| ENSACAG00000011883 | 12962         |
| ENSACAG00000004639 | 12963         |
| ENSACAG00000012183 | 12964 XYLB    |
| ENSACAG00000003084 | 12965 HAO1    |
| ENSACAG00000016972 | 12966 CASC1   |
| ENSACAG00000016925 | 12967 CCDC151 |
| ENSACAG00000007345 | 12968 LGI1    |
| ENSACAG00000004273 | 12969 KCNQ5   |
| ENSACAG00000012413 | 12970 DNAH1   |
| ENSACAG00000005680 | 12971 GPER1   |
| ENSACAG00000024192 | 12972         |
| ENSACAG00000005175 | 12973         |
| ENSACAG00000001957 | 12974 MORN1   |
| ENSACAG00000026213 | 12975 MROH8   |
| ENSACAG00000016113 | 12976         |

|                    |                   |
|--------------------|-------------------|
| ENSACAG00000026916 | 12977             |
| ENSACAG00000014399 | 12978 SALL1       |
| ENSACAG00000026231 | 12979 FYB         |
| ENSACAG00000004027 | 12980             |
| ENSACAG00000017489 | 12981             |
| ENSACAG00000029696 | 12982             |
| ENSACAG00000006121 | 12983 INPP5D      |
| ENSACAG00000029379 | 12984             |
| ENSACAG00000028602 | 12985 PDZK1IP1    |
| ENSACAG00000007138 | 12986 SLC12A5     |
| ENSACAG00000002861 | 12987 THBS2       |
| ENSACAG00000020994 | 12988             |
| ENSACAG00000016270 | 12989 FLI1        |
| ENSACAG00000001720 | 12990 EPB42       |
| ENSACAG00000008497 | 12991 TTC23L      |
| ENSACAG00000013940 | 12992 STARD10     |
| ENSACAG00000001824 | 12993 PRG4        |
| ENSACAG00000012963 | 12994             |
| ENSACAG00000011195 | 12995 VCAN        |
| ENSACAG00000012618 | 12996 TECRL       |
| ENSACAG00000010504 | 12997 THEMIS      |
| ENSACAG00000013938 | 12998 SPEG        |
| ENSACAG00000006757 | 12999 LDHD        |
| ENSACAG00000008921 | 13000 GMFG        |
| ENSACAG00000011754 | 13001 RERG        |
| ENSACAG00000027379 | 13002             |
| ENSACAG00000011271 | 13003 P2RY1       |
| ENSACAG00000002610 | 13004 PCTP        |
| ENSACAG00000027795 | 13005             |
| ENSACAG00000016146 | 13006 RHOJ        |
| ENSACAG00000024412 | 13007             |
| ENSACAG00000005786 | 13008             |
| ENSACAG00000001770 | 13009             |
| ENSACAG00000020787 | 13010 aca-mir-143 |
| ENSACAG00000028961 | 13011             |
| ENSACAG00000004622 | 13012             |
| ENSACAG00000013968 | 13013 CBARP       |
| ENSACAG00000025906 | 13014             |
| ENSACAG00000026226 | 13015             |
| ENSACAG00000001156 | 13016 GJD2        |
| ENSACAG00000002437 | 13017 PDP2        |
| ENSACAG00000000645 | 13018             |

|                    |                |
|--------------------|----------------|
| ENSACAG00000008571 | 13019 ENPP2    |
| ENSACAG00000028002 | 13020          |
| ENSACAG00000008815 | 13021 LFNG     |
| ENSACAG00000000275 | 13022 FAM189A1 |
| ENSACAG00000019987 | 13023          |
| ENSACAG00000022075 | 13024          |
| ENSACAG00000027389 | 13025 PPP1R9A  |
| ENSACAG00000013313 | 13026 AGAP2    |
| ENSACAG00000003786 | 13027 KIF17    |
| ENSACAG00000008697 | 13028 NECAB3   |
| ENSACAG00000015440 | 13029 DIXDC1   |
| ENSACAG00000000390 | 13030 STS      |
| ENSACAG00000029373 | 13031          |
| ENSACAG00000015072 | 13032 SH2B2    |
| ENSACAG00000024909 | 13033          |
| ENSACAG00000019567 | 13034 5S_rRNA  |
| ENSACAG00000017334 | 13035          |
| ENSACAG00000016377 | 13036 NFKBID   |
| ENSACAG00000012790 | 13037          |
| ENSACAG00000003111 | 13038          |
| ENSACAG00000027554 | 13039          |
| ENSACAG00000016968 | 13040          |
| ENSACAG00000029200 | 13041          |
| ENSACAG00000012932 | 13042          |
| ENSACAG00000028678 | 13043 EGFL7    |
| ENSACAG00000005465 | 13044          |
| ENSACAG00000028261 | 13045          |
| ENSACAG00000029490 | 13046 KCNMB1   |
| ENSACAG00000010914 | 13047 MAP2     |
| ENSACAG00000015048 | 13048 PAPOLG   |
| ENSACAG00000026895 | 13049 OMP      |
| ENSACAG00000016979 | 13050 CRB2     |
| ENSACAG00000010812 | 13051          |
| ENSACAG00000000732 | 13052 PRPH2    |
| ENSACAG00000010093 | 13053 TRPM8    |
| ENSACAG00000005094 | 13054          |
| ENSACAG00000013158 | 13055          |
| ENSACAG00000012193 | 13056 PLOD1    |
| ENSACAG00000001298 | 13057 PARD6A   |
| ENSACAG00000002953 | 13058 ENPP6    |
| ENSACAG00000029621 | 13059 SRD5A2   |
| ENSACAG00000029282 | 13060          |

|                    |                 |
|--------------------|-----------------|
| ENSACAG00000000432 | 13061 BHLHE41   |
| ENSACAG00000010377 | 13062 LIM2      |
| ENSACAG00000009453 | 13063           |
| ENSACAG00000006486 | 13064 GIPC2     |
| ENSACAG00000028160 | 13065           |
| ENSACAG00000016139 | 13066 CNTN1     |
| ENSACAG00000013726 | 13067 ALOX5     |
| ENSACAG00000028464 | 13068 RALYL     |
| ENSACAG00000001814 | 13069           |
| ENSACAG00000023972 | 13070           |
| ENSACAG00000012043 | 13071 EFCAB5    |
| ENSACAG00000002839 | 13072           |
| ENSACAG00000015407 | 13073 CDHR1     |
| ENSACAG00000006079 | 13074           |
| ENSACAG00000003456 | 13075 LRRC39    |
| ENSACAG00000006915 | 13076 PLSCR5    |
| ENSACAG00000011780 | 13077 TNFRSF11A |
| ENSACAG00000000463 | 13078           |
| ENSACAG00000014146 | 13079 RBM41     |
| ENSACAG00000014883 | 13080 LIPC      |
| ENSACAG00000001973 | 13081 ANKEF1    |
| ENSACAG00000017817 | 13082           |
| ENSACAG00000028166 | 13083 HES6      |
| ENSACAG00000025627 | 13084           |
| ENSACAG00000029264 | 13085           |
| ENSACAG00000010194 | 13086 P2RX2     |
| ENSACAG00000000179 | 13087 PROZ      |
| ENSACAG00000008853 | 13088 CCDC68    |
| ENSACAG00000015391 | 13089 AATK      |
| ENSACAG00000011557 | 13090 RNF152    |
| ENSACAG00000005710 | 13091 COL20A1   |
| ENSACAG00000022228 | 13092           |
| ENSACAG00000000571 | 13093           |
| ENSACAG00000011630 | 13094 FAT4      |
| ENSACAG00000012804 | 13095 LRRC72    |
| ENSACAG00000009956 | 13096           |
| ENSACAG00000015269 | 13097 A1CF      |
| ENSACAG00000025651 | 13098           |
| ENSACAG00000015417 | 13099 CDC20B    |
| ENSACAG00000007918 | 13100 RAMP3     |
| ENSACAG00000025195 | 13101           |
| ENSACAG00000010828 | 13102 DCST1     |



|                    |                 |
|--------------------|-----------------|
| ENSACAG00000014526 | 13103           |
| ENSACAG00000017091 | 13104           |
| ENSACAG00000013766 | 13105           |
| ENSACAG00000016056 | 13106 SLC7A14   |
| ENSACAG00000026507 | 13107           |
| ENSACAG00000012661 | 13108 LMO1      |
| ENSACAG00000011406 | 13109 GRM2      |
| ENSACAG00000005620 | 13110           |
| ENSACAG00000002903 | 13111           |
| ENSACAG00000021190 | 13112 5S_rRNA   |
| ENSACAG00000029235 | 13113 FAM213A   |
| ENSACAG00000008328 | 13114           |
| ENSACAG00000027623 | 13115 SMG6      |
| ENSACAG00000012397 | 13116 ST8SIA5   |
| ENSACAG00000014826 | 13117 SPACA1    |
| ENSACAG00000016929 | 13118 GUCY1B3   |
| ENSACAG00000023924 | 13119           |
| ENSACAG00000015247 | 13120 DENND1C   |
| ENSACAG00000022608 | 13121           |
| ENSACAG00000024511 | 13122           |
| ENSACAG00000029627 | 13123           |
| ENSACAG00000010759 | 13124 SLC2A9    |
| ENSACAG00000017899 | 13125 HAP1      |
| ENSACAG00000006868 | 13126 XDH       |
| ENSACAG00000007284 | 13127 SLC39A5   |
| ENSACAG00000006413 | 13128           |
| ENSACAG00000000747 | 13129 IQUB      |
| ENSACAG00000003354 | 13130 RUNX1T1   |
| ENSACAG00000022033 | 13131           |
| ENSACAG00000009804 | 13132           |
| ENSACAG00000000087 | 13133 FAM174B   |
| ENSACAG00000029634 | 13134           |
| ENSACAG00000015456 | 13135           |
| ENSACAG00000009233 | 13136 RANBP3L   |
| ENSACAG00000003462 | 13137 OPN3      |
| ENSACAG00000029057 | 13138 KIAA1211L |
| ENSACAG00000015924 | 13139 DOK5      |
| ENSACAG00000010384 | 13140 ASB18     |
| ENSACAG00000025232 | 13141           |
| ENSACAG00000012601 | 13142 SEC16B    |
| ENSACAG00000011193 | 13143           |
| ENSACAG00000008078 | 13144           |

|                    |               |
|--------------------|---------------|
| ENSACAG00000027376 | 13145         |
| ENSACAG00000009067 | 13146         |
| ENSACAG00000000801 | 13147 LRRC4C  |
| ENSACAG00000021742 | 13148 5S_rRNA |
| ENSACAG00000029327 | 13149         |
| ENSACAG00000023409 | 13150         |
| ENSACAG00000012858 | 13151 JCHAIN  |
| ENSACAG00000022932 | 13152 PKD1    |
| ENSACAG00000002524 | 13153 SYT6    |
| ENSACAG00000026953 | 13154 CPA5    |
| ENSACAG00000001951 | 13155 DMBX1   |
| ENSACAG00000002876 | 13156 RHOU    |
| ENSACAG00000011039 | 13157         |
| ENSACAG00000003206 | 13158 FREM3   |
| ENSACAG00000022472 | 13159 ARID3C  |
| ENSACAG00000000334 | 13160 NXPH2   |
| ENSACAG00000027736 | 13161         |
| ENSACAG00000025730 | 13162         |
| ENSACAG00000014760 | 13163 EFCAB12 |
| ENSACAG00000004237 | 13164         |
| ENSACAG00000013907 | 13165         |
| ENSACAG00000002203 | 13166         |
| ENSACAG00000004828 | 13167 SLC6A14 |
| ENSACAG00000026130 | 13168         |
| ENSACAG00000009502 | 13169 ITGB2   |
| ENSACAG00000016075 | 13170         |
| ENSACAG00000007392 | 13171 TTLL11  |
| ENSACAG00000009016 | 13172         |
| ENSACAG00000015258 | 13173 GDPD2   |
| ENSACAG00000000772 | 13174 UBE2QL1 |
| ENSACAG00000008148 | 13175 DMC1    |
| ENSACAG00000015641 | 13176 MFAP3L  |
| ENSACAG00000000439 | 13177 ANOS1   |
| ENSACAG00000002911 | 13178 DCDC2   |
| ENSACAG00000000846 | 13179         |
| ENSACAG00000001108 | 13180         |
| ENSACAG00000010696 | 13181 RASGRF2 |
| ENSACAG00000016368 | 13182 PRKCG   |
| ENSACAG00000007090 | 13183 HCN4    |
| ENSACAG00000008202 | 13184 WNT1    |
| ENSACAG00000009692 | 13185 ILDR2   |
| ENSACAG00000019605 | 13186 5S_rRNA |

|                    |                |
|--------------------|----------------|
| ENSACAG00000008268 | 13187 ARX      |
| ENSACAG00000015482 | 13188 CCDC106  |
| ENSACAG00000005767 | 13189 WDR17    |
| ENSACAG00000017503 | 13190 GPR26    |
| ENSACAG00000002525 | 13191          |
| ENSACAG00000017753 | 13192 AK1      |
| ENSACAG00000027267 | 13193          |
| ENSACAG00000017257 | 13194 ISM2     |
| ENSACAG00000028933 | 13195          |
| ENSACAG00000012616 | 13196 SOCS2    |
| ENSACAG00000016799 | 13197 DMGDH    |
| ENSACAG00000006986 | 13198 ITGB4    |
| ENSACAG00000013768 | 13199          |
| ENSACAG00000022931 | 13200          |
| ENSACAG00000010237 | 13201 ENPEP    |
| ENSACAG00000028218 | 13202          |
| ENSACAG00000025194 | 13203          |
| ENSACAG00000017793 | 13204 CHST3    |
| ENSACAG00000017957 | 13205 KCNH4    |
| ENSACAG00000002343 | 13206          |
| ENSACAG00000019023 | 13207 7SK      |
| ENSACAG00000015249 | 13208 CHAT     |
| ENSACAG00000014669 | 13209 FAT3     |
| ENSACAG00000013822 | 13210          |
| ENSACAG00000015501 | 13211 PSPN     |
| ENSACAG00000010856 | 13212 GARNL3   |
| ENSACAG00000017402 | 13213 SLC46A2  |
| ENSACAG00000016716 | 13214 AFMID    |
| ENSACAG00000027246 | 13215          |
| ENSACAG00000018395 | 13216 5S_rRNA  |
| ENSACAG00000011126 | 13217 TMEM179  |
| ENSACAG00000025616 | 13218          |
| ENSACAG00000008616 | 13219 ELOVL2   |
| ENSACAG00000010158 | 13220 ATP4A    |
| ENSACAG00000012925 | 13221 DND1     |
| ENSACAG00000015170 | 13222 RNF111   |
| ENSACAG00000008623 | 13223 SLC1A7   |
| ENSACAG00000017619 | 13224 SERPINB5 |
| ENSACAG00000024526 | 13225          |
| ENSACAG00000010678 | 13226          |
| ENSACAG00000016059 | 13227 CYP2S1   |
| ENSACAG00000000760 | 13228 ANKRD22  |

|                    |                |
|--------------------|----------------|
| ENSACAG00000016951 | 13229 BATF     |
| ENSACAG00000011323 | 13230          |
| ENSACAG00000009390 | 13231 MALRD1   |
| ENSACAG00000022454 | 13232 CPLX3    |
| ENSACAG00000013372 | 13233          |
| ENSACAG00000007936 | 13234 ZACN     |
| ENSACAG00000002749 | 13235 GAS2L2   |
| ENSACAG00000001042 | 13236 CPA1     |
| ENSACAG00000009603 | 13237 CHST2    |
| ENSACAG00000025394 | 13238          |
| ENSACAG00000006375 | 13239          |
| ENSACAG00000017806 | 13240          |
| ENSACAG00000008106 | 13241          |
| ENSACAG00000004063 | 13242 CCDC39   |
| ENSACAG00000008799 | 13243          |
| ENSACAG00000026793 | 13244          |
| ENSACAG00000009675 | 13245 GPA33    |
| ENSACAG00000029103 | 13246 MEI4     |
| ENSACAG00000023343 | 13247          |
| ENSACAG00000005752 | 13248          |
| ENSACAG00000017854 | 13249 TTR      |
| ENSACAG00000006066 | 13250 DNTT     |
| ENSACAG00000007082 | 13251          |
| ENSACAG00000012923 | 13252          |
| ENSACAG00000007746 | 13253 VMO1     |
| ENSACAG00000005151 | 13254          |
| ENSACAG00000016774 | 13255 IL2ORB   |
| ENSACAG00000028747 | 13256          |
| ENSACAG00000011767 | 13257 TMEM72   |
| ENSACAG00000013744 | 13258 UROC1    |
| ENSACAG00000005471 | 13259 PMEL     |
| ENSACAG00000003647 | 13260          |
| ENSACAG00000004962 | 13261 MYOM2    |
| ENSACAG00000023036 | 13262          |
| ENSACAG00000024920 | 13263 AGMO     |
| ENSACAG00000006778 | 13264 SNX22    |
| ENSACAG00000008771 | 13265 CTSK     |
| ENSACAG00000003749 | 13266 ATP1B4   |
| ENSACAG00000008548 | 13267          |
| ENSACAG00000013381 | 13268 B4GALNT4 |
| ENSACAG00000011239 | 13269 PRSS16   |
| ENSACAG00000011375 | 13270 FAM221B  |

|                    |                |
|--------------------|----------------|
| ENSACAG00000009001 | 13271          |
| ENSACAG00000012795 | 13272 CTSE     |
| ENSACAG00000003840 | 13273          |
| ENSACAG00000003384 | 13274 POU2F3   |
| ENSACAG00000022532 | 13275          |
| ENSACAG00000005812 | 13276 KCNK2    |
| ENSACAG00000004254 | 13277 CACNA1G  |
| ENSACAG00000003308 | 13278 IKZF3    |
| ENSACAG00000006620 | 13279          |
| ENSACAG00000010033 | 13280 LSR      |
| ENSACAG00000000262 | 13281 HIVEP3   |
| ENSACAG00000010111 | 13282          |
| ENSACAG00000004386 | 13283          |
| ENSACAG00000014944 | 13284 JAKMIP1  |
| ENSACAG00000012330 | 13285          |
| ENSACAG00000003950 | 13286          |
| ENSACAG00000026614 | 13287          |
| ENSACAG00000023801 | 13288          |
| ENSACAG00000013175 | 13289 PLA2G7   |
| ENSACAG00000026134 | 13290          |
| ENSACAG00000005064 | 13291 GATA5    |
| ENSACAG00000028488 | 13292          |
| ENSACAG00000010551 | 13293 NECAB1   |
| ENSACAG00000028631 | 13294 DYTN     |
| ENSACAG00000012710 | 13295          |
| ENSACAG00000009857 | 13296 DRD3     |
| ENSACAG00000014459 | 13297 VSTM5    |
| ENSACAG00000009350 | 13298 GIPR     |
| ENSACAG00000005253 | 13299 FAM132A  |
| ENSACAG00000008619 | 13300 CETP     |
| ENSACAG00000016715 | 13301          |
| ENSACAG00000013536 | 13302          |
| ENSACAG00000016732 | 13303 SMPX     |
| ENSACAG00000001783 | 13304 ADAMTSL4 |
| ENSACAG00000006327 | 13305          |
| ENSACAG00000003340 | 13306          |
| ENSACAG00000014925 | 13307 CCDC17   |
| ENSACAG00000011953 | 13308          |
| ENSACAG00000004378 | 13309 CCNA1    |
| ENSACAG00000001131 | 13310 SEMA4F   |
| ENSACAG00000015741 | 13311 PYGO2    |
| ENSACAG00000000587 | 13312 C2CD4D   |

|                    |                |
|--------------------|----------------|
| ENSACAG00000008518 | 13313          |
| ENSACAG00000006398 | 13314 PRKCH    |
| ENSACAG00000010358 | 13315 VAT1L    |
| ENSACAG00000001366 | 13316 EPPK1    |
| ENSACAG00000011072 | 13317 MEX3B    |
| ENSACAG00000009082 | 13318          |
| ENSACAG00000028832 | 13319          |
| ENSACAG00000002540 | 13320          |
| ENSACAG00000028886 | 13321          |
| ENSACAG00000029063 | 13322          |
| ENSACAG00000002391 | 13323 SPRED3   |
| ENSACAG00000008358 | 13324          |
| ENSACAG00000008499 | 13325 BAIAP2L2 |
| ENSACAG00000006125 | 13326          |
| ENSACAG00000022912 | 13327 CMTM5    |
| ENSACAG00000022856 | 13328          |
| ENSACAG00000024115 | 13329          |
| ENSACAG00000028304 | 13330          |
| ENSACAG00000001225 | 13331 ZSWIM2   |
| ENSACAG00000016824 | 13332 CCDC159  |
| ENSACAG00000022295 | 13333 ANKLE1   |
| ENSACAG00000016446 | 13334 UBIAD1   |
| ENSACAG00000011719 | 13335 FOXN4    |
| ENSACAG00000005361 | 13336          |
| ENSACAG00000008817 | 13337          |
| ENSACAG00000016567 | 13338 RASAL3   |
| ENSACAG00000008149 | 13339 C20orf96 |
| ENSACAG00000012796 | 13340 METTL20  |
| ENSACAG00000002053 | 13341          |
| ENSACAG00000027871 | 13342          |
| ENSACAG00000008722 | 13343 ARMC3    |
| ENSACAG00000003222 | 13344          |
| ENSACAG00000029525 | 13345 COLCA2   |
| ENSACAG00000029188 | 13346          |
| ENSACAG00000015293 | 13347 GABRP    |
| ENSACAG00000017572 | 13348          |
| ENSACAG00000000795 | 13349 CXCR4    |
| ENSACAG00000007166 | 13350 MAPKAPK3 |
| ENSACAG00000013680 | 13351          |
| ENSACAG00000025962 | 13352          |
| ENSACAG00000000592 | 13353 B3GAT1   |
| ENSACAG00000028471 | 13354 CD5      |

|                    |                |
|--------------------|----------------|
| ENSACAG00000014129 | 13355          |
| ENSACAG00000008041 | 13356          |
| ENSACAG00000001588 | 13357 B3GALT1  |
| ENSACAG00000006094 | 13358 CBLN1    |
| ENSACAG00000014997 | 13359 ITGA10   |
| ENSACAG00000011967 | 13360 PEX11A   |
| ENSACAG00000028408 | 13361          |
| ENSACAG00000011649 | 13362          |
| ENSACAG00000015901 | 13363 GNAT3    |
| ENSACAG00000011804 | 13364 TMEM196  |
| ENSACAG00000014934 | 13365 CFAP47   |
| ENSACAG00000011027 | 13366          |
| ENSACAG00000029130 | 13367          |
| ENSACAG00000009464 | 13368 SYT8     |
| ENSACAG00000028005 | 13369          |
| ENSACAG00000020626 | 13370 5S_rRNA  |
| ENSACAG00000001421 | 13371 RAI1     |
| ENSACAG00000001024 | 13372 TBX22    |
| ENSACAG00000005323 | 13373 CNR2     |
| ENSACAG00000011481 | 13374 ERICH3   |
| ENSACAG00000028124 | 13375          |
| ENSACAG00000001233 | 13376          |
| ENSACAG00000010509 | 13377          |
| ENSACAG00000013389 | 13378 ADAMTS3  |
| ENSACAG00000014114 | 13379          |
| ENSACAG00000012243 | 13380          |
| ENSACAG00000010950 | 13381          |
| ENSACAG00000012930 | 13382          |
| ENSACAG00000024839 | 13383 SRMS     |
| ENSACAG00000011860 | 13384 TBR1     |
| ENSACAG00000000797 | 13385 RLBP1    |
| ENSACAG00000010807 | 13386 HHLA1    |
| ENSACAG00000008929 | 13387 MSLN     |
| ENSACAG00000012489 | 13388          |
| ENSACAG00000029684 | 13389          |
| ENSACAG00000004650 | 13390 PADI2    |
| ENSACAG00000008706 | 13391 C10orf67 |
| ENSACAG00000011233 | 13392          |
| ENSACAG00000009013 | 13393 HTRA4    |
| ENSACAG00000015257 | 13394          |
| ENSACAG00000002214 | 13395          |
| ENSACAG00000017632 | 13396 PTAFR    |

|                    |                |
|--------------------|----------------|
| ENSACAG00000012848 | 13397 SLC25A45 |
| ENSACAG00000006470 | 13398          |
| ENSACAG00000005791 | 13399 SCML4    |
| ENSACAG00000014774 | 13400          |
| ENSACAG00000005529 | 13401          |
| ENSACAG00000005658 | 13402          |
| ENSACAG00000022609 | 13403          |
| ENSACAG00000022478 | 13404 CCKBR    |
| ENSACAG00000011491 | 13405          |
| ENSACAG00000006184 | 13406          |
| ENSACAG00000000750 | 13407 ARSA     |
| ENSACAG00000002682 | 13408          |
| ENSACAG00000028834 | 13409 SYCP2L   |
| ENSACAG00000002158 | 13410          |
| ENSACAG00000004515 | 13411 RASD1    |
| ENSACAG00000022222 | 13412 SNORD60  |
| ENSACAG00000012603 | 13413 STK33    |
| ENSACAG00000001672 | 13414 TRDN     |
| ENSACAG00000020172 | 13415 7SK      |
| ENSACAG00000011625 | 13416 TTLL10   |
| ENSACAG00000013797 | 13417          |
| ENSACAG00000004861 | 13418 SLC15A2  |
| ENSACAG00000009358 | 13419 RIBC1    |
| ENSACAG00000002008 | 13420          |
| ENSACAG00000026737 | 13421          |
| ENSACAG00000015139 | 13422          |
| ENSACAG00000008234 | 13423          |
| ENSACAG00000016959 | 13424 CELF5    |
| ENSACAG00000014832 | 13425 COCH     |
| ENSACAG00000029451 | 13426          |
| ENSACAG00000012168 | 13427 ZPLD1    |
| ENSACAG00000009740 | 13428          |
| ENSACAG00000021000 | 13429 C5orf49  |
| ENSACAG00000009395 | 13430 EFNA2    |
| ENSACAG00000001137 | 13431 FZD8     |
| ENSACAG00000024897 | 13432          |
| ENSACAG00000017437 | 13433 UNC45B   |
| ENSACAG00000004811 | 13434 SERINC4  |
| ENSACAG00000008364 | 13435          |
| ENSACAG00000027083 | 13436          |
| ENSACAG00000015116 | 13437          |
| ENSACAG00000027015 | 13438          |



|                    |                |
|--------------------|----------------|
| ENSACAG00000016054 | 13439          |
| ENSACAG00000028521 | 13440 MUC13    |
| ENSACAG00000017931 | 13441          |
| ENSACAG00000015176 | 13442 PRDM14   |
| ENSACAG00000012267 | 13443 KCNT1    |
| ENSACAG00000013386 | 13444 TRPC5    |
| ENSACAG00000011135 | 13445          |
| ENSACAG00000003265 | 13446 SLC26A7  |
| ENSACAG00000010054 | 13447          |
| ENSACAG00000009514 | 13448 CA9      |
| ENSACAG00000016987 | 13449          |
| ENSACAG00000010454 | 13450 PLCXD3   |
| ENSACAG00000017365 | 13451          |
| ENSACAG00000005219 | 13452 CRYBA2   |
| ENSACAG00000002584 | 13453 NELL2    |
| ENSACAG00000023869 | 13454          |
| ENSACAG00000000089 | 13455 RGMA     |
| ENSACAG00000000194 | 13456 C2orf50  |
| ENSACAG00000008133 | 13457 DPYSL5   |
| ENSACAG00000015879 | 13458          |
| ENSACAG00000010159 | 13459          |
| ENSACAG00000021065 | 13460          |
| ENSACAG00000024890 | 13461          |
| ENSACAG00000029603 | 13462 CCDC178  |
| ENSACAG00000004575 | 13463 AP1S3    |
| ENSACAG00000014967 | 13464          |
| ENSACAG00000011391 | 13465 MTHFD2L  |
| ENSACAG00000003582 | 13466 SLC25A35 |
| ENSACAG00000029640 | 13467          |
| ENSACAG00000023840 | 13468          |
| ENSACAG00000027577 | 13469          |
| ENSACAG00000006672 | 13470 TFEC     |
| ENSACAG00000005408 | 13471 MAG      |
| ENSACAG00000004258 | 13472 HDC      |
| ENSACAG00000007193 | 13473 LGR5     |
| ENSACAG00000004714 | 13474          |
| ENSACAG00000017504 | 13475 CPXM2    |
| ENSACAG00000007073 | 13476          |
| ENSACAG00000026349 | 13477          |
| ENSACAG00000001675 | 13478          |
| ENSACAG00000022736 | 13479          |
| ENSACAG00000027545 | 13480 CELF3    |

|                    |                |
|--------------------|----------------|
| ENSACAG00000002051 | 13481 OPTC     |
| ENSACAG00000028613 | 13482          |
| ENSACAG00000029402 | 13483          |
| ENSACAG00000008438 | 13484          |
| ENSACAG00000014542 | 13485 LMO3     |
| ENSACAG00000005810 | 13486          |
| ENSACAG00000008439 | 13487 KIF25    |
| ENSACAG00000010125 | 13488 KIAA1324 |
| ENSACAG00000021567 | 13489 5S_rRNA  |
| ENSACAG00000025799 | 13490          |
| ENSACAG00000012266 | 13491          |
| ENSACAG00000006406 | 13492 GRM6     |
| ENSACAG00000015334 | 13493 CDX1     |
| ENSACAG00000014494 | 13494 SEL1L3   |
| ENSACAG00000026800 | 13495          |
| ENSACAG00000009396 | 13496 UCP3     |
| ENSACAG00000019442 | 13497 5S_rRNA  |
| ENSACAG00000008961 | 13498 OMG      |
| ENSACAG00000010976 | 13499          |
| ENSACAG00000002480 | 13500 WT1      |
| ENSACAG00000014635 | 13501 CCKAR    |
| ENSACAG00000014823 | 13502 CCDC67   |
| ENSACAG00000025639 | 13503          |
| ENSACAG00000016534 | 13504 NXNL2    |
| ENSACAG00000000597 | 13505 ADAMTS9  |
| ENSACAG00000028847 | 13506          |
| ENSACAG00000007318 | 13507          |
| ENSACAG00000003152 | 13508          |
| ENSACAG00000000957 | 13509 MATN1    |
| ENSACAG00000014880 | 13510 CYBB     |
| ENSACAG00000000527 | 13511 TMEM178A |
| ENSACAG00000015781 | 13512 SAMD7    |
| ENSACAG00000013187 | 13513 FMO2     |
| ENSACAG00000004424 | 13514          |
| ENSACAG00000017896 | 13515          |
| ENSACAG00000012238 | 13516 TRPC3    |
| ENSACAG00000004055 | 13517 COL5A3   |
| ENSACAG00000005556 | 13518          |
| ENSACAG00000022793 | 13519          |
| ENSACAG00000029376 | 13520          |
| ENSACAG00000004375 | 13521          |
| ENSACAG00000010593 | 13522 DNAJC12  |

|                    |               |
|--------------------|---------------|
| ENSACAG00000010969 | 13523 COL8A1  |
| ENSACAG00000023594 | 13524         |
| ENSACAG00000015387 | 13525         |
| ENSACAG00000002693 | 13526 SLC10A2 |
| ENSACAG00000007719 | 13527 BCHE    |
| ENSACAG00000029070 | 13528 BTBD16  |
| ENSACAG00000025007 | 13529         |
| ENSACAG00000006068 | 13530 DGKK    |
| ENSACAG00000009363 | 13531         |
| ENSACAG00000007814 | 13532 MED12L  |
| ENSACAG00000013979 | 13533         |
| ENSACAG00000010723 | 13534         |
| ENSACAG00000000813 | 13535 GRIN2A  |
| ENSACAG00000015565 | 13536 KCNU1   |
| ENSACAG00000027877 | 13537         |
| ENSACAG00000005295 | 13538         |
| ENSACAG00000002904 | 13539 FGF9    |
| ENSACAG00000016097 | 13540         |
| ENSACAG00000003637 | 13541 CNDP1   |
| ENSACAG00000001150 | 13542 WNK2    |
| ENSACAG00000014825 | 13543 SAT2    |
| ENSACAG00000010475 | 13544 PLXNB1  |
| ENSACAG00000003956 | 13545 MRAP2   |
| ENSACAG00000029457 | 13546         |
| ENSACAG00000016246 | 13547         |
| ENSACAG00000012373 | 13548         |
| ENSACAG00000016135 | 13549 ENTPD2  |
| ENSACAG00000000246 | 13550 SEMA7A  |
| ENSACAG00000005099 | 13551 NPY1R   |
| ENSACAG00000017460 | 13552 DNAH9   |
| ENSACAG00000017263 | 13553 EPHX3   |
| ENSACAG00000024727 | 13554         |
| ENSACAG00000005700 | 13555 PROC    |
| ENSACAG00000024098 | 13556         |
| ENSACAG00000001162 | 13557         |
| ENSACAG00000008481 | 13558 CABP4   |
| ENSACAG00000002359 | 13559 TREM2   |
| ENSACAG00000007706 | 13560         |
| ENSACAG00000015031 | 13561 TBX6    |
| ENSACAG00000024548 | 13562         |
| ENSACAG00000008666 | 13563 DUSP13  |
| ENSACAG00000017895 | 13564 MROH2A  |

|                     |               |
|---------------------|---------------|
| ENSACAG00000002590  | 13565         |
| ENSACAG00000002605  | 13566         |
| ENSACAG00000006659  | 13567 FA2H    |
| ENSACAG000000010296 | 13568         |
| ENSACAG000000028253 | 13569 SYCE3   |
| ENSACAG000000024337 | 13570         |
| ENSACAG000000004309 | 13571         |
| ENSACAG000000014797 | 13572 SCARF1  |
| ENSACAG000000029582 | 13573 TMEM40  |
| ENSACAG000000028819 | 13574 PPP1R36 |
| ENSACAG000000029039 | 13575 LY86    |
| ENSACAG000000000999 | 13576 CNRIP1  |
| ENSACAG000000003361 | 13577 SYCP1   |
| ENSACAG000000028119 | 13578         |
| ENSACAG000000022415 | 13579         |
| ENSACAG000000006719 | 13580 LRP11   |
| ENSACAG000000015192 | 13581 APOBEC4 |
| ENSACAG000000022360 | 13582         |
| ENSACAG000000029258 | 13583 MFSD2B  |
| ENSACAG000000000499 | 13584 HTR1D   |
| ENSACAG000000013715 | 13585 AOC1    |
| ENSACAG000000012391 | 13586 GPR75   |
| ENSACAG000000017187 | 13587 TBC1D21 |
| ENSACAG000000009574 | 13588 TTC21A  |
| ENSACAG000000005817 | 13589 CHRNA4  |
| ENSACAG000000004738 | 13590 MYRFL   |
| ENSACAG000000011363 | 13591 GABRA5  |
| ENSACAG000000024578 | 13592 GPRIN1  |
| ENSACAG000000025893 | 13593         |
| ENSACAG000000029566 | 13594         |
| ENSACAG000000017339 | 13595         |
| ENSACAG000000002941 | 13596         |
| ENSACAG000000002357 | 13597 MOV10L1 |
| ENSACAG000000007727 | 13598         |
| ENSACAG000000022253 | 13599         |
| ENSACAG000000003225 | 13600         |
| ENSACAG000000002939 | 13601 PRL     |
| ENSACAG000000012725 | 13602 WNT11   |
| ENSACAG000000002142 | 13603         |
| ENSACAG000000023856 | 13604         |
| ENSACAG000000024100 | 13605         |
| ENSACAG000000007321 | 13606 KBTBD12 |

|                    |                |
|--------------------|----------------|
| ENSACAG00000007099 | 13607 SPNS3    |
| ENSACAG00000003359 | 13608 POU2F2   |
| ENSACAG00000004588 | 13609 IGFBP2   |
| ENSACAG00000008841 | 13610 FGF16    |
| ENSACAG00000021770 | 13611 5S_rRNA  |
| ENSACAG00000027343 | 13612          |
| ENSACAG00000007807 | 13613 KANK4    |
| ENSACAG00000016362 | 13614 RD3      |
| ENSACAG00000019415 | 13615 7SK      |
| ENSACAG00000026495 | 13616          |
| ENSACAG00000013375 | 13617          |
| ENSACAG00000025315 | 13618 MAP6D1   |
| ENSACAG00000009492 | 13619          |
| ENSACAG00000006641 | 13620 C11orf53 |
| ENSACAG00000028335 | 13621          |
| ENSACAG00000028015 | 13622 VSIG10L  |
| ENSACAG00000026720 | 13623 NPAS4    |
| ENSACAG00000017192 | 13624          |
| ENSACAG00000000019 | 13625 KCNH8    |
| ENSACAG00000029181 | 13626          |
| ENSACAG00000013575 | 13627 TSKS     |
| ENSACAG00000015021 | 13628 TEX11    |
| ENSACAG00000011470 | 13629 BPIFC    |
| ENSACAG00000002660 | 13630          |
| ENSACAG00000020217 | 13631 5S_rRNA  |
| ENSACAG00000027118 | 13632          |
| ENSACAG00000029591 | 13633 EPHX4    |
| ENSACAG00000024220 | 13634          |
| ENSACAG00000007848 | 13635 SLC39A2  |
| ENSACAG00000007134 | 13636          |
| ENSACAG00000007761 | 13637 KNG1     |
| ENSACAG00000029390 | 13638          |
| ENSACAG00000004891 | 13639 MBL2     |
| ENSACAG00000028944 | 13640 ZNF322   |
| ENSACAG00000013687 | 13641          |
| ENSACAG00000013885 | 13642 HAL      |
| ENSACAG00000006896 | 13643 RELN     |
| ENSACAG00000011464 | 13644 LPIN3    |
| ENSACAG00000012398 | 13645 RHAG     |
| ENSACAG00000011033 | 13646 PAX8     |
| ENSACAG00000006146 | 13647 SKOR2    |
| ENSACAG00000029056 | 13648          |

|                    |                |
|--------------------|----------------|
| ENSACAG00000014161 | 13649          |
| ENSACAG00000016343 | 13650 VSX2     |
| ENSACAG00000003399 | 13651 MAB21L3  |
| ENSACAG00000004586 | 13652 CCDC28B  |
| ENSACAG00000026332 | 13653          |
| ENSACAG00000001017 | 13654          |
| ENSACAG00000003494 | 13655          |
| ENSACAG00000011194 | 13656 CLRN2    |
| ENSACAG00000015346 | 13657          |
| ENSACAG00000028965 | 13658          |
| ENSACAG00000028896 | 13659          |
| ENSACAG00000006085 | 13660 CDHR2    |
| ENSACAG00000000993 | 13661 TBPL2    |
| ENSACAG00000000356 | 13662 CCDC102A |
| ENSACAG00000016595 | 13663 MB       |
| ENSACAG00000013431 | 13664 ADGRV1   |
| ENSACAG00000003561 | 13665 FNDC5    |
| ENSACAG00000014443 | 13666 SBSPON   |
| ENSACAG00000002164 | 13667 PCDH7    |
| ENSACAG00000017046 | 13668 LYL1     |
| ENSACAG00000000248 | 13669          |
| ENSACAG00000002223 | 13670 CHST9    |
| ENSACAG00000024227 | 13671          |
| ENSACAG00000024780 | 13672          |
| ENSACAG00000014209 | 13673 STRIP2   |
| ENSACAG00000011915 | 13674          |
| ENSACAG00000008658 | 13675 TTC12    |
| ENSACAG00000004883 | 13676 IGDCC3   |
| ENSACAG00000002818 | 13677          |
| ENSACAG00000007822 | 13678          |
| ENSACAG00000023689 | 13679          |
| ENSACAG00000029294 | 13680 SPINK5   |
| ENSACAG00000014448 | 13681 EXD3     |
| ENSACAG00000024685 | 13682          |
| ENSACAG00000007497 | 13683 MYH7B    |
| ENSACAG00000011331 | 13684          |
| ENSACAG00000029695 | 13685          |
| ENSACAG00000023143 | 13686          |
| ENSACAG00000010349 | 13687          |
| ENSACAG00000015831 | 13688 PARVG    |
| ENSACAG00000003065 | 13689          |
| ENSACAG00000028767 | 13690          |

|                    |                |
|--------------------|----------------|
| ENSACAG00000003503 | 13691 PLA1A    |
| ENSACAG00000004390 | 13692 ISL1     |
| ENSACAG00000002637 | 13693 KCNH3    |
| ENSACAG00000000018 | 13694 EFHB     |
| ENSACAG00000029474 | 13695          |
| ENSACAG00000021016 | 13696 AVPR2    |
| ENSACAG00000008842 | 13697 MST1     |
| ENSACAG00000002113 | 13698 TRIM14   |
| ENSACAG00000004379 | 13699 LYPD3    |
| ENSACAG00000013247 | 13700 LIN7B    |
| ENSACAG00000003105 | 13701 SFRP5    |
| ENSACAG00000028666 | 13702          |
| ENSACAG00000029296 | 13703          |
| ENSACAG00000014222 | 13704 CCDC180  |
| ENSACAG00000003040 | 13705 COL11A2  |
| ENSACAG00000009463 | 13706          |
| ENSACAG00000000885 | 13707 RNF122   |
| ENSACAG00000023714 | 13708          |
| ENSACAG00000002380 | 13709 RRAD     |
| ENSACAG00000008989 | 13710          |
| ENSACAG00000000842 | 13711          |
| ENSACAG00000004668 | 13712 CSDC2    |
| ENSACAG00000006617 | 13713          |
| ENSACAG00000006710 | 13714          |
| ENSACAG00000013371 | 13715 MMRN1    |
| ENSACAG00000002411 | 13716 DMRT2    |
| ENSACAG00000023540 | 13717          |
| ENSACAG00000014055 | 13718          |
| ENSACAG00000026861 | 13719          |
| ENSACAG00000013954 | 13720          |
| ENSACAG00000002261 | 13721 SGK2     |
| ENSACAG00000003236 | 13722          |
| ENSACAG00000006984 | 13723 ZC3H12D  |
| ENSACAG00000011842 | 13724          |
| ENSACAG00000006701 | 13725 SNAI3    |
| ENSACAG00000028783 | 13726 C11orf65 |
| ENSACAG00000002512 | 13727 CAPN8    |
| ENSACAG00000013427 | 13728 FGF1     |
| ENSACAG00000003480 | 13729 TRIM29   |
| ENSACAG00000003505 | 13730 PROM2    |
| ENSACAG00000001220 | 13731 FAM163A  |
| ENSACAG00000016448 | 13732 PTCHD2   |

|                    |                |
|--------------------|----------------|
| ENSACAG00000008239 | 13733          |
| ENSACAG00000010572 | 13734 PHYHIP   |
| ENSACAG00000013446 | 13735          |
| ENSACAG00000008579 | 13736          |
| ENSACAG00000006314 | 13737          |
| ENSACAG00000003884 | 13738          |
| ENSACAG00000028583 | 13739 CHP2     |
| ENSACAG00000017744 | 13740 MEGF6    |
| ENSACAG00000015070 | 13741 CDHR5    |
| ENSACAG00000003818 | 13742          |
| ENSACAG00000015752 | 13743 PODNL1   |
| ENSACAG00000011937 | 13744          |
| ENSACAG00000000546 | 13745 DNASE1L2 |
| ENSACAG00000009196 | 13746 MUC6     |
| ENSACAG00000015983 | 13747 DCST2    |
| ENSACAG00000007743 | 13748          |
| ENSACAG00000011241 | 13749 OXTR     |
| ENSACAG00000028315 | 13750          |
| ENSACAG00000025523 | 13751          |
| ENSACAG00000006892 | 13752 ZMYND10  |
| ENSACAG00000013852 | 13753 SH3RF2   |
| ENSACAG00000000714 | 13754 GRB14    |
| ENSACAG00000027393 | 13755 FAT2     |
| ENSACAG00000025359 | 13756 YPEL2    |
| ENSACAG00000005125 | 13757 MYL3     |
| ENSACAG00000002324 | 13758 ABCG4    |
| ENSACAG00000022361 | 13759 NKX1-2   |
| ENSACAG00000004778 | 13760 SCN3B    |
| ENSACAG00000007098 | 13761 KCTD8    |
| ENSACAG00000008744 | 13762 HYAL3    |
| ENSACAG00000028945 | 13763          |
| ENSACAG00000011766 | 13764 UPK3A    |
| ENSACAG00000011014 | 13765 STRA8    |
| ENSACAG00000022291 | 13766          |
| ENSACAG00000020602 | 13767 7SK      |
| ENSACAG00000027233 | 13768 SLC39A4  |
| ENSACAG00000004815 | 13769 IMPG1    |
| ENSACAG00000006098 | 13770          |
| ENSACAG00000022501 | 13771 LBX1     |
| ENSACAG00000028355 | 13772          |
| ENSACAG00000005052 | 13773          |
| ENSACAG00000010442 | 13774          |



|                    |                |
|--------------------|----------------|
| ENSACAG00000025861 | 13775          |
| ENSACAG00000016793 | 13776          |
| ENSACAG00000028420 | 13777 SMIM14   |
| ENSACAG00000028389 | 13778          |
| ENSACAG00000029503 | 13779          |
| ENSACAG00000003951 | 13780          |
| ENSACAG00000001203 | 13781 SLC30A10 |
| ENSACAG00000009353 | 13782 IFITM10  |
| ENSACAG00000010378 | 13783 PLBD1    |
| ENSACAG00000029076 | 13784 UBE2U    |
| ENSACAG00000013616 | 13785          |
| ENSACAG00000022129 | 13786 PRR36    |
| ENSACAG00000004767 | 13787 ITIH5    |
| ENSACAG00000003650 | 13788          |
| ENSACAG00000006019 | 13789 GUCA1A   |
| ENSACAG00000010249 | 13790 SLC7A6   |
| ENSACAG00000006900 | 13791          |
| ENSACAG00000016788 | 13792 GFRAL    |
| ENSACAG00000002438 | 13793 NRG2     |
| ENSACAG00000029094 | 13794          |
| ENSACAG00000008371 | 13795          |
| ENSACAG00000015571 | 13796          |
| ENSACAG00000028360 | 13797 LRRIQ3   |
| ENSACAG00000020960 | 13798 CNBD1    |
| ENSACAG00000011586 | 13799          |
| ENSACAG00000004850 | 13800 IGDCC4   |
| ENSACAG00000023941 | 13801          |
| ENSACAG00000016932 | 13802 TTYH1    |
| ENSACAG00000005896 | 13803 TRAF3IP3 |
| ENSACAG00000017595 | 13804 TEKT3    |
| ENSACAG00000001510 | 13805 SYNDIG1  |
| ENSACAG00000016405 | 13806 GHSR     |
| ENSACAG00000001228 | 13807 CLEC19A  |
| ENSACAG00000006989 | 13808          |
| ENSACAG00000002516 | 13809          |
| ENSACAG00000012342 | 13810 MYBPC2   |
| ENSACAG00000011113 | 13811 TMC3     |
| ENSACAG00000001600 | 13812 KCNS3    |
| ENSACAG00000011951 | 13813 SYCN     |
| ENSACAG00000017052 | 13814 GRPR     |
| ENSACAG00000025777 | 13815          |
| ENSACAG00000017112 | 13816          |

|                    |               |
|--------------------|---------------|
| ENSACAG00000028144 | 13817 PROB1   |
| ENSACAG00000024837 | 13818         |
| ENSACAG00000002369 | 13819 THBS3   |
| ENSACAG00000002764 | 13820 PDE2A   |
| ENSACAG00000013229 | 13821 SHD     |
| ENSACAG00000028526 | 13822         |
| ENSACAG00000008952 | 13823 FAM169A |
| ENSACAG00000017776 | 13824 NCAN    |
| ENSACAG00000002398 | 13825 ACMSD   |
| ENSACAG00000006295 | 13826 C2orf82 |
| ENSACAG00000026283 | 13827         |
| ENSACAG00000012552 | 13828         |
| ENSACAG00000022359 | 13829         |
| ENSACAG00000029281 | 13830         |
| ENSACAG00000017843 | 13831 TPBGL   |
| ENSACAG00000028935 | 13832 BDH2    |
| ENSACAG00000023978 | 13833 B3GNT8  |
| ENSACAG00000014982 | 13834 DBH     |
| ENSACAG00000009632 | 13835         |
| ENSACAG00000017244 | 13836 DFNBS9  |
| ENSACAG00000003358 | 13837         |
| ENSACAG00000012700 | 13838 LRRC2   |
| ENSACAG00000002948 | 13839 RSPH1   |
| ENSACAG00000011616 | 13840 SLC13A5 |
| ENSACAG00000003003 | 13841 MUC4    |
| ENSACAG00000017902 | 13842 NDP     |
| ENSACAG00000004941 | 13843 CRTAM   |
| ENSACAG00000017630 | 13844         |
| ENSACAG00000014799 | 13845         |
| ENSACAG00000008325 | 13846 TSPEAR  |
| ENSACAG00000009911 | 13847 ATP12A  |
| ENSACAG00000005338 | 13848         |
| ENSACAG00000012108 | 13849         |
| ENSACAG00000008153 | 13850 AIPL1   |
| ENSACAG00000001124 | 13851         |
| ENSACAG00000015581 | 13852 MAP9    |
| ENSACAG00000007691 | 13853 KCNC2   |
| ENSACAG00000013367 | 13854 FAM78B  |
| ENSACAG00000013863 | 13855 CNTN2   |
| ENSACAG00000024629 | 13856 KCNJ5   |
| ENSACAG00000012527 | 13857 LOXHD1  |
| ENSACAG00000003792 | 13858 TMEM91  |

|                    |                |
|--------------------|----------------|
| ENSACAG00000023938 | 13859          |
| ENSACAG00000016757 | 13860 KLK14    |
| ENSACAG00000006204 | 13861          |
| ENSACAG00000003911 | 13862 KCNK6    |
| ENSACAG00000002887 | 13863 RPH3A    |
| ENSACAG00000020691 | 13864 5S_rRNA  |
| ENSACAG00000001912 | 13865 GATA4    |
| ENSACAG00000006261 | 13866          |
| ENSACAG00000013101 | 13867 TMEM98   |
| ENSACAG00000004257 | 13868 BPIFB2   |
| ENSACAG00000006512 | 13869 FER1L5   |
| ENSACAG00000006200 | 13870          |
| ENSACAG00000002790 | 13871 ANKRD2   |
| ENSACAG00000013250 | 13872 PABPN1L  |
| ENSACAG00000003195 | 13873 C11orf91 |
| ENSACAG00000009044 | 13874          |
| ENSACAG00000005500 | 13875 HAND2    |
| ENSACAG00000025773 | 13876          |
| ENSACAG00000024888 | 13877          |
| ENSACAG00000015605 | 13878 ENG      |
| ENSACAG00000016192 | 13879 TST      |
| ENSACAG00000011105 | 13880          |
| ENSACAG00000013932 | 13881 PROK2    |
| ENSACAG00000004334 | 13882          |
| ENSACAG00000017490 | 13883 HMX3     |
| ENSACAG00000016220 | 13884 GRIN2D   |
| ENSACAG00000011762 | 13885 KRT18    |
| ENSACAG00000021357 | 13886 5S_rRNA  |
| ENSACAG00000015437 | 13887 PIH1D2   |
| ENSACAG00000002541 | 13888 RAPGEFL1 |
| ENSACAG00000010114 | 13889          |
| ENSACAG00000029381 | 13890          |
| ENSACAG00000013122 | 13891 B3GNT9   |
| ENSACAG00000009403 | 13892          |
| ENSACAG00000017009 | 13893 PTGER1   |
| ENSACAG00000014651 | 13894          |
| ENSACAG00000017228 | 13895 SLC4A1   |
| ENSACAG00000017051 | 13896 XKR7     |
| ENSACAG00000029312 | 13897 TMEM233  |
| ENSACAG00000023795 | 13898          |
| ENSACAG00000002755 | 13899          |
| ENSACAG00000001314 | 13900 ADAMTS10 |

|                    |                |
|--------------------|----------------|
| ENSACAG00000013212 | 13901          |
| ENSACAG00000016922 | 13902          |
| ENSACAG00000009856 | 13903 CCDC172  |
| ENSACAG00000013238 | 13904 STAP2    |
| ENSACAG00000029114 | 13905          |
| ENSACAG00000008006 | 13906 C3orf62  |
| ENSACAG00000011797 | 13907 IMPG2    |
| ENSACAG00000017539 | 13908 ODF3     |
| ENSACAG00000028949 | 13909 GOLGA7B  |
| ENSACAG00000022611 | 13910          |
| ENSACAG00000009384 | 13911          |
| ENSACAG00000002077 | 13912 KCNK17   |
| ENSACAG00000006665 | 13913 TRIM72   |
| ENSACAG00000016119 | 13914 TMPRSS6  |
| ENSACAG00000012303 | 13915 TOX3     |
| ENSACAG00000008265 | 13916 BNIPL    |
| ENSACAG00000006613 | 13917          |
| ENSACAG00000010634 | 13918 PPP1R27  |
| ENSACAG00000011367 | 13919 KLHL4    |
| ENSACAG00000007494 | 13920 SPTBN2   |
| ENSACAG00000008135 | 13921          |
| ENSACAG00000006727 | 13922          |
| ENSACAG00000007380 | 13923          |
| ENSACAG00000003803 | 13924          |
| ENSACAG00000021461 | 13925 SNORD33  |
| ENSACAG00000012428 | 13926          |
| ENSACAG00000008155 | 13927 TBC1D10C |
| ENSACAG00000017194 | 13928          |
| ENSACAG00000028670 | 13929          |
| ENSACAG00000006218 | 13930 NGEF     |
| ENSACAG00000016785 | 13931          |
| ENSACAG00000007756 | 13932          |
| ENSACAG00000016058 | 13933 S1PR5    |
| ENSACAG00000028694 | 13934 FAM167B  |
| ENSACAG00000015970 | 13935          |
| ENSACAG00000015003 | 13936 KIF19    |
| ENSACAG00000025875 | 13937          |
| ENSACAG00000005498 | 13938 SCRG1    |
| ENSACAG00000026021 | 13939          |
| ENSACAG00000002015 | 13940 SAYSD1   |
| ENSACAG00000016710 | 13941 MLIP     |
| ENSACAG00000013491 | 13942 FOXP3    |

|                    |                |
|--------------------|----------------|
| ENSACAG00000029593 | 13943          |
| ENSACAG00000012735 | 13944 OTOA     |
| ENSACAG00000008610 | 13945 SLC5A10  |
| ENSACAG00000026884 | 13946          |
| ENSACAG00000010918 | 13947 SH3GL3   |
| ENSACAG00000024715 | 13948 5S_rRNA  |
| ENSACAG00000015538 | 13949 ETV3L    |
| ENSACAG00000014323 | 13950 PLP1     |
| ENSACAG00000003846 | 13951          |
| ENSACAG00000009825 | 13952 DRC3     |
| ENSACAG00000023373 | 13953          |
| ENSACAG00000024096 | 13954 MAPK15   |
| ENSACAG00000012006 | 13955 PSMD10   |
| ENSACAG00000012996 | 13956 GSC      |
| ENSACAG00000027671 | 13957          |
| ENSACAG00000023131 | 13958          |
| ENSACAG00000009663 | 13959          |
| ENSACAG00000012361 | 13960          |
| ENSACAG00000005768 | 13961 MXRA5    |
| ENSACAG00000010012 | 13962          |
| ENSACAG00000003820 | 13963          |
| ENSACAG00000010256 | 13964 SIM1     |
| ENSACAG00000009833 | 13965 VWA2     |
| ENSACAG00000028649 | 13966          |
| ENSACAG00000016734 | 13967 RASGEF1C |
| ENSACAG00000011281 | 13968          |
| ENSACAG00000000380 | 13969 OLFM4    |
| ENSACAG00000004271 | 13970          |
| ENSACAG00000005985 | 13971          |
| ENSACAG00000000569 | 13972          |
| ENSACAG00000029449 | 13973          |
| ENSACAG00000028866 | 13974          |
| ENSACAG00000017438 | 13975          |
| ENSACAG00000002582 | 13976 GALNT3   |
| ENSACAG00000017627 | 13977          |
| ENSACAG00000005543 | 13978          |
| ENSACAG00000014317 | 13979          |
| ENSACAG00000008087 | 13980 CA14     |
| ENSACAG00000003701 | 13981 ZIC5     |
| ENSACAG00000000694 | 13982 IRX2     |
| ENSACAG00000029123 | 13983          |
| ENSACAG00000016604 | 13984 TMEM144  |

|                    |                      |
|--------------------|----------------------|
| ENSACAG00000023096 | 13985                |
| ENSACAG00000011810 | 13986                |
| ENSACAG00000001844 | 13987 EXOC3L1        |
| ENSACAG00000005516 | 13988 SLC17A9        |
| ENSACAG00000028316 | 13989                |
| ENSACAG00000006547 | 13990 KLHL30         |
| ENSACAG00000016099 | 13991 PCLO           |
| ENSACAG00000003744 | 13992                |
| ENSACAG00000010167 | 13993 DCLK3          |
| ENSACAG00000028565 | 13994                |
| ENSACAG00000004049 | 13995 SIGLEC1        |
| ENSACAG00000009487 | 13996 CRB1           |
| ENSACAG00000017300 | 13997 VWA7           |
| ENSACAG00000019018 | 13998 aca-mir-181b-2 |
| ENSACAG00000005745 | 13999 SCN1B          |
| ENSACAG00000028699 | 14000                |
| ENSACAG00000027861 | 14001                |
| ENSACAG00000013064 | 14002 HHIPL1         |
| ENSACAG00000008922 | 14003                |
| ENSACAG00000013967 | 14004 PTPRO          |
| ENSACAG00000001706 | 14005                |
| ENSACAG00000028842 | 14006                |
| ENSACAG00000002945 | 14007 LRP5L          |
| ENSACAG00000015399 | 14008 CCNO           |
| ENSACAG00000006508 | 14009                |
| ENSACAG00000014011 | 14010 SPTA1          |
| ENSACAG00000015932 | 14011 STEAP4         |
| ENSACAG00000026654 | 14012                |
| ENSACAG00000022560 | 14013 SUSD1          |
| ENSACAG00000017031 | 14014 TMEM27         |
| ENSACAG00000023535 | 14015                |
| ENSACAG00000021198 | 14016 5S_rRNA        |
| ENSACAG00000002803 | 14017                |
| ENSACAG00000014038 | 14018 RAPGEF5        |
| ENSACAG00000001740 | 14019 AGT            |
| ENSACAG00000028692 | 14020                |
| ENSACAG00000008924 | 14021                |
| ENSACAG00000013118 | 14022                |
| ENSACAG00000011492 | 14023                |
| ENSACAG00000029607 | 14024 GOLT1A         |
| ENSACAG00000006349 | 14025                |
| ENSACAG00000023345 | 14026                |

|                    |                |
|--------------------|----------------|
| ENSACAG00000029573 | 14027          |
| ENSACAG00000001768 | 14028 CAPN9    |
| ENSACAG00000028849 | 14029          |
| ENSACAG00000006998 | 14030 CLCN1    |
| ENSACAG00000014876 | 14031 SPATA22  |
| ENSACAG00000006211 | 14032 FAM71D   |
| ENSACAG00000007997 | 14033 NR4A2    |
| ENSACAG00000000591 | 14034          |
| ENSACAG00000001403 | 14035 SELP     |
| ENSACAG00000015547 | 14036          |
| ENSACAG00000004084 | 14037 SHANK2   |
| ENSACAG00000006157 | 14038          |
| ENSACAG00000014946 | 14039 TOPAZ1   |
| ENSACAG00000011421 | 14040          |
| ENSACAG00000000237 | 14041 ROBO3    |
| ENSACAG00000005291 | 14042          |
| ENSACAG00000013285 | 14043 GNG11    |
| ENSACAG00000015037 | 14044          |
| ENSACAG00000024794 | 14045          |
| ENSACAG00000023435 | 14046          |
| ENSACAG00000001074 | 14047 ZNF831   |
| ENSACAG00000024876 | 14048 HRG      |
| ENSACAG00000014174 | 14049          |
| ENSACAG00000006513 | 14050 SLC13A1  |
| ENSACAG00000028685 | 14051          |
| ENSACAG00000025817 | 14052          |
| ENSACAG00000011611 | 14053 ZCWPW1   |
| ENSACAG00000008627 | 14054 TAS1R2   |
| ENSACAG00000005877 | 14055 OTOP3    |
| ENSACAG00000012164 | 14056 ERN2     |
| ENSACAG00000006722 | 14057 SST      |
| ENSACAG00000000648 | 14058 ADAMTS16 |
| ENSACAG00000001214 | 14059 PDILT    |
| ENSACAG00000012952 | 14060          |
| ENSACAG00000026155 | 14061 FASLG    |
| ENSACAG00000012133 | 14062 KCNJ16   |
| ENSACAG00000015735 | 14063          |
| ENSACAG00000001059 | 14064 CSF3R    |
| ENSACAG00000001428 | 14065 MCTP2    |
| ENSACAG00000028268 | 14066          |
| ENSACAG00000012379 | 14067          |
| ENSACAG00000000347 | 14068 TP63     |

|                    |                |
|--------------------|----------------|
| ENSACAG00000009558 | 14069 KY       |
| ENSACAG00000027925 | 14070          |
| ENSACAG00000028697 | 14071          |
| ENSACAG00000017488 | 14072          |
| ENSACAG00000021999 | 14073          |
| ENSACAG00000026225 | 14074          |
| ENSACAG00000013170 | 14075 TDRD6    |
| ENSACAG00000000879 | 14076          |
| ENSACAG00000012362 | 14077 RBPJL    |
| ENSACAG00000027033 | 14078          |
| ENSACAG00000025986 | 14079          |
| ENSACAG00000006078 | 14080 PIANP    |
| ENSACAG00000016733 | 14081 JPH2     |
| ENSACAG00000011191 | 14082 C12orf50 |
| ENSACAG00000009343 | 14083 M1AP     |
| ENSACAG00000028688 | 14084 C16orf78 |
| ENSACAG00000023873 | 14085 CCDC88B  |
| ENSACAG00000005636 | 14086 PRUNE2   |
| ENSACAG00000005794 | 14087          |
| ENSACAG00000018210 | 14088 7SK      |
| ENSACAG00000012080 | 14089 NXPE3    |
| ENSACAG00000004944 | 14090          |
| ENSACAG00000007032 | 14091 PCYT1B   |
| ENSACAG00000010055 | 14092          |
| ENSACAG00000027930 | 14093          |
| ENSACAG00000011037 | 14094          |
| ENSACAG00000009228 | 14095 FAM179A  |
| ENSACAG00000028750 | 14096          |
| ENSACAG00000005859 | 14097 SPATA4   |
| ENSACAG00000028959 | 14098          |
| ENSACAG00000023426 | 14099          |
| ENSACAG00000016831 | 14100 ATP7B    |
| ENSACAG00000016552 | 14101 RXFP1    |
| ENSACAG00000011539 | 14102          |
| ENSACAG00000015173 | 14103 TMPRSS7  |
| ENSACAG00000025926 | 14104          |
| ENSACAG00000010899 | 14105          |
| ENSACAG00000028764 | 14106          |
| ENSACAG00000012956 | 14107          |
| ENSACAG00000009501 | 14108 AGBL2    |
| ENSACAG00000029121 | 14109 SUCNR1   |
| ENSACAG00000015627 | 14110          |



|                    |                |
|--------------------|----------------|
| ENSACAG00000014685 | 14111 TCTE1    |
| ENSACAG00000005163 | 14112 SFR1     |
| ENSACAG00000018629 | 14113 5S_rRNA  |
| ENSACAG00000007877 | 14114 IL10     |
| ENSACAG00000001293 | 14115 THEM6    |
| ENSACAG00000009689 | 14116 MYO15A   |
| ENSACAG00000003699 | 14117 IGFALS   |
| ENSACAG00000004217 | 14118 COL4A3   |
| ENSACAG00000013593 | 14119          |
| ENSACAG00000006667 | 14120          |
| ENSACAG00000020308 | 14121          |
| ENSACAG00000017258 | 14122          |
| ENSACAG00000017642 | 14123          |
| ENSACAG00000011257 | 14124          |
| ENSACAG00000023640 | 14125          |
| ENSACAG00000017726 | 14126 CFAP52   |
| ENSACAG00000005467 | 14127          |
| ENSACAG00000026415 | 14128 TSPAN33  |
| ENSACAG00000004635 | 14129          |
| ENSACAG00000014914 | 14130          |
| ENSACAG00000007049 | 14131 TACSTD2  |
| ENSACAG00000007244 | 14132          |
| ENSACAG00000005411 | 14133          |
| ENSACAG00000000048 | 14134 ABCC8    |
| ENSACAG00000016840 | 14135 C19orf67 |
| ENSACAG00000007635 | 14136 GPR84    |
| ENSACAG00000017216 | 14137 RSPO1    |
| ENSACAG00000006221 | 14138          |
| ENSACAG00000008460 | 14139 MON1A    |
| ENSACAG00000004960 | 14140          |
| ENSACAG00000002561 | 14141 CCDC81   |
| ENSACAG00000000399 | 14142          |
| ENSACAG00000010277 | 14143          |
| ENSACAG00000028051 | 14144          |
| ENSACAG00000009433 | 14145          |
| ENSACAG00000014431 | 14146 MYF5     |
| ENSACAG00000020495 | 14147 7SK      |
| ENSACAG00000004557 | 14148          |
| ENSACAG00000016550 | 14149 NAT8     |
| ENSACAG00000000510 | 14150          |
| ENSACAG00000014834 | 14151          |
| ENSACAG00000025663 | 14152          |

|                    |                |
|--------------------|----------------|
| ENSACAG00000006328 | 14153 LKAAEAR1 |
| ENSACAG00000008327 | 14154 SDCBP2   |
| ENSACAG00000024151 | 14155          |
| ENSACAG00000004140 | 14156 MDK      |
| ENSACAG00000015114 | 14157 LRRC9    |
| ENSACAG00000009208 | 14158          |
| ENSACAG00000017522 | 14159          |
| ENSACAG00000005919 | 14160 LMX1A    |
| ENSACAG00000013453 | 14161          |
| ENSACAG00000005230 | 14162 TRPM6    |
| ENSACAG00000010418 | 14163 TRHR     |
| ENSACAG00000010095 | 14164          |
| ENSACAG00000023472 | 14165          |
| ENSACAG00000025910 | 14166          |
| ENSACAG00000006053 | 14167 BMP15    |
| ENSACAG00000004452 | 14168 PEBP1    |
| ENSACAG00000022821 | 14169          |
| ENSACAG00000026447 | 14170          |
| ENSACAG00000017477 | 14171          |
| ENSACAG00000011502 | 14172 CD8A     |
| ENSACAG00000010961 | 14173 GRIN3B   |
| ENSACAG00000029069 | 14174          |
| ENSACAG00000016722 | 14175          |
| ENSACAG00000028609 | 14176          |
| ENSACAG00000016865 | 14177 TTPA     |
| ENSACAG00000014780 | 14178 DAW1     |
| ENSACAG00000024704 | 14179          |
| ENSACAG00000028591 | 14180          |
| ENSACAG00000013592 | 14181          |
| ENSACAG00000022681 | 14182          |
| ENSACAG00000005494 | 14183 OPRM1    |
| ENSACAG00000003150 | 14184 RYR1     |
| ENSACAG00000014529 | 14185 F9       |
| ENSACAG00000011523 | 14186 LNP1     |
| ENSACAG00000022860 | 14187          |
| ENSACAG00000001765 | 14188          |
| ENSACAG00000029256 | 14189          |
| ENSACAG00000014650 | 14190          |
| ENSACAG00000007215 | 14191          |
| ENSACAG00000007434 | 14192 IL1RL1   |
| ENSACAG00000017842 | 14193          |
| ENSACAG00000015770 | 14194 SPDEF    |

|                    |                  |
|--------------------|------------------|
| ENSACAG00000003228 | 14195            |
| ENSACAG00000000699 | 14196            |
| ENSACAG00000027824 | 14197            |
| ENSACAG00000002509 | 14198            |
| ENSACAG00000011793 | 14199 WISP3      |
| ENSACAG00000009508 | 14200 GGT7       |
| ENSACAG00000016546 | 14201 NLGN1      |
| ENSACAG00000010084 | 14202 CNGB3      |
| ENSACAG00000010011 | 14203 PLA2G10    |
| ENSACAG00000013585 | 14204 SVOPL      |
| ENSACAG00000010078 | 14205            |
| ENSACAG00000007229 | 14206 CXorf21    |
| ENSACAG00000028013 | 14207            |
| ENSACAG00000003668 | 14208 RNF182     |
| ENSACAG00000005664 | 14209            |
| ENSACAG00000029078 | 14210            |
| ENSACAG00000012356 | 14211 KLF15      |
| ENSACAG00000013581 | 14212 TEX14      |
| ENSACAG00000009461 | 14213            |
| ENSACAG00000014557 | 14214            |
| ENSACAG00000009964 | 14215 GIF        |
| ENSACAG00000019052 | 14216 7SK        |
| ENSACAG00000014794 | 14217            |
| ENSACAG00000002240 | 14218 C6orf229   |
| ENSACAG00000015730 | 14219            |
| ENSACAG00000008451 | 14220 ST6GALNAC1 |
| ENSACAG00000028504 | 14221            |
| ENSACAG00000006519 | 14222 ESPNL      |
| ENSACAG00000007517 | 14223 SEPT4      |
| ENSACAG00000029609 | 14224            |
| ENSACAG00000004893 | 14225 SEPW1      |
| ENSACAG00000005235 | 14226            |
| ENSACAG00000005946 | 14227 SAG        |
| ENSACAG00000015545 | 14228 DHH        |
| ENSACAG00000026015 | 14229            |
| ENSACAG00000016127 | 14230            |
| ENSACAG00000008056 | 14231 ASZ1       |
| ENSACAG00000016545 | 14232 THBS4      |
| ENSACAG00000014959 | 14233 DNAI2      |
| ENSACAG00000013395 | 14234 STMN2      |
| ENSACAG00000000124 | 14235 TTC22      |
| ENSACAG00000023988 | 14236            |

|                    |                |
|--------------------|----------------|
| ENSACAG00000006392 | 14237 CCDC122  |
| ENSACAG00000017607 | 14238 SI       |
| ENSACAG00000029450 | 14239          |
| ENSACAG00000013417 | 14240          |
| ENSACAG00000006644 | 14241          |
| ENSACAG00000016428 | 14242 NSMF     |
| ENSACAG00000010767 | 14243 FZD3     |
| ENSACAG00000002140 | 14244 TMEM173  |
| ENSACAG00000014233 | 14245 RASGRP2  |
| ENSACAG00000007942 | 14246 SH2D1B   |
| ENSACAG00000005806 | 14247 HGFAC    |
| ENSACAG00000004678 | 14248          |
| ENSACAG00000006414 | 14249          |
| ENSACAG00000013387 | 14250          |
| ENSACAG00000012825 | 14251          |
| ENSACAG00000006748 | 14252 PRSS8    |
| ENSACAG00000004117 | 14253 PELI3    |
| ENSACAG00000026841 | 14254          |
| ENSACAG00000021954 | 14255          |
| ENSACAG00000004120 | 14256 CHR4     |
| ENSACAG00000016747 | 14257          |
| ENSACAG00000013165 | 14258          |
| ENSACAG00000015881 | 14259          |
| ENSACAG00000002042 | 14260 HLX      |
| ENSACAG00000012895 | 14261 CRYBA1   |
| ENSACAG00000025228 | 14262 ITPRIPL2 |
| ENSACAG00000029269 | 14263 MYO5C    |
| ENSACAG00000019542 | 14264 5S_rRNA  |
| ENSACAG00000026440 | 14265          |
| ENSACAG00000010852 | 14266 PPM1N    |
| ENSACAG00000000342 | 14267 MMP9     |
| ENSACAG00000013677 | 14268          |
| ENSACAG00000006209 | 14269 ACRBP    |
| ENSACAG00000021069 | 14270          |
| ENSACAG00000011735 | 14271          |
| ENSACAG00000017238 | 14272          |
| ENSACAG00000002646 | 14273          |
| ENSACAG00000016915 | 14274 ANKRD33  |
| ENSACAG00000010693 | 14275 TBX19    |
| ENSACAG00000003688 | 14276 AKAP14   |
| ENSACAG00000016038 | 14277 CBX8     |
| ENSACAG00000016780 | 14278 TNNT1    |

|                    |                 |
|--------------------|-----------------|
| ENSACAG00000009619 | 14279 ACSM5     |
| ENSACAG00000029343 | 14280           |
| ENSACAG00000008145 | 14281           |
| ENSACAG00000028575 | 14282           |
| ENSACAG00000011314 | 14283 LURAP1L   |
| ENSACAG00000003323 | 14284 AMER2     |
| ENSACAG00000029117 | 14285           |
| ENSACAG00000027714 | 14286           |
| ENSACAG00000009865 | 14287 PNLIPRP3  |
| ENSACAG00000009978 | 14288 TECTB     |
| ENSACAG00000007597 | 14289 RAX       |
| ENSACAG00000010499 | 14290 C6orf58   |
| ENSACAG00000012327 | 14291 SLC25A18  |
| ENSACAG00000003408 | 14292 SPINT1    |
| ENSACAG00000007326 | 14293           |
| ENSACAG00000029257 | 14294           |
| ENSACAG00000028567 | 14295           |
| ENSACAG00000002860 | 14296           |
| ENSACAG00000022584 | 14297           |
| ENSACAG00000010511 | 14298 FAXC      |
| ENSACAG00000027387 | 14299 KCNK15    |
| ENSACAG00000015135 | 14300 SLC17A6   |
| ENSACAG00000020931 | 14301 PDE6H     |
| ENSACAG00000006715 | 14302           |
| ENSACAG00000012847 | 14303 CSRNP3    |
| ENSACAG00000004486 | 14304 CD28      |
| ENSACAG00000013937 | 14305           |
| ENSACAG00000015700 | 14306 KCNN3     |
| ENSACAG00000029528 | 14307           |
| ENSACAG00000029405 | 14308 SNCA      |
| ENSACAG00000004881 | 14309           |
| ENSACAG00000012435 | 14310 PLEKHG7   |
| ENSACAG00000013068 | 14311 NFE2L3    |
| ENSACAG00000019022 | 14312           |
| ENSACAG00000008768 | 14313 DRD2      |
| ENSACAG00000009520 | 14314 CACNA1S   |
| ENSACAG00000008399 | 14315 NODAL     |
| ENSACAG00000008219 | 14316 SELE      |
| ENSACAG00000005260 | 14317 LAMC2     |
| ENSACAG00000001659 | 14318 EGFL6     |
| ENSACAG00000029637 | 14319           |
| ENSACAG00000004070 | 14320 SERPINA10 |

|                    |                |
|--------------------|----------------|
| ENSACAG00000010252 | 14321          |
| ENSACAG00000024924 | 14322          |
| ENSACAG00000013065 | 14323 SH2D6    |
| ENSACAG00000000729 | 14324 IRX4     |
| ENSACAG00000015464 | 14325          |
| ENSACAG00000026786 | 14326          |
| ENSACAG00000006963 | 14327 CPB1     |
| ENSACAG00000000468 | 14328          |
| ENSACAG00000009596 | 14329          |
| ENSACAG00000023321 | 14330          |
| ENSACAG00000004605 | 14331          |
| ENSACAG00000002013 | 14332 PCSK7    |
| ENSACAG00000002252 | 14333 PAX6     |
| ENSACAG00000027601 | 14334          |
| ENSACAG00000008667 | 14335 UNC79    |
| ENSACAG00000028549 | 14336          |
| ENSACAG00000028505 | 14337          |
| ENSACAG00000007313 | 14338 MMP17    |
| ENSACAG00000012637 | 14339 IBSP     |
| ENSACAG00000003499 | 14340 BEST2    |
| ENSACAG00000010106 | 14341 PRDM8    |
| ENSACAG00000028955 | 14342 NCR3LG1  |
| ENSACAG00000003759 | 14343 LTBP4    |
| ENSACAG00000001693 | 14344 CATIP    |
| ENSACAG00000009863 | 14345 HMGCS2   |
| ENSACAG00000010887 | 14346          |
| ENSACAG00000003974 | 14347 SEPT3    |
| ENSACAG00000028887 | 14348 HACD4    |
| ENSACAG00000009928 | 14349 LRRC8E   |
| ENSACAG00000029252 | 14350          |
| ENSACAG00000004572 | 14351 RASAL1   |
| ENSACAG00000028770 | 14352          |
| ENSACAG00000013399 | 14353 STK31    |
| ENSACAG00000002707 | 14354 CHR1     |
| ENSACAG00000029641 | 14355          |
| ENSACAG00000004734 | 14356 CATSPER4 |
| ENSACAG00000028820 | 14357 CYGB     |
| ENSACAG00000002581 | 14358 DBX2     |
| ENSACAG00000017357 | 14359 TFAP2E   |
| ENSACAG00000025704 | 14360          |
| ENSACAG00000011211 | 14361 MNX1     |
| ENSACAG00000011400 | 14362 ARAP3    |

|                    |                |
|--------------------|----------------|
| ENSACAG00000008835 | 14363 AP5B1    |
| ENSACAG00000000593 | 14364 CDH5     |
| ENSACAG00000024516 | 14365 TMEM74B  |
| ENSACAG00000011950 | 14366 NCCRP1   |
| ENSACAG00000006258 | 14367          |
| ENSACAG00000002362 | 14368 KIAA0319 |
| ENSACAG00000005220 | 14369          |
| ENSACAG00000028926 | 14370          |
| ENSACAG00000022243 | 14371          |
| ENSACAG00000001622 | 14372 TP73     |
| ENSACAG00000006172 | 14373 PXDNL    |
| ENSACAG00000014454 | 14374 GRK1     |
| ENSACAG00000028912 | 14375 PRRG2    |
| ENSACAG00000004066 | 14376          |
| ENSACAG00000015015 | 14377          |
| ENSACAG00000013105 | 14378 CYP27B1  |
| ENSACAG00000012993 | 14379 METTL11B |
| ENSACAG00000001180 | 14380 CELSR3   |
| ENSACAG00000004624 | 14381 HRH3     |
| ENSACAG00000013152 | 14382 CBFA2T3  |
| ENSACAG00000016065 | 14383 rh2      |
| ENSACAG00000017722 | 14384 ADAMTS15 |
| ENSACAG00000005237 | 14385 ALPL     |
| ENSACAG00000015857 | 14386          |
| ENSACAG00000004751 | 14387 BBOX1    |
| ENSACAG00000010453 | 14388 MMP25    |
| ENSACAG00000024278 | 14389 BTLA     |
| ENSACAG00000015182 | 14390 SLC6A7   |
| ENSACAG00000007499 | 14391          |
| ENSACAG00000004141 | 14392          |
| ENSACAG00000023621 | 14393          |
| ENSACAG00000006642 | 14394          |
| ENSACAG00000009848 | 14395 JPH3     |
| ENSACAG00000000599 | 14396 NUDT18   |
| ENSACAG00000001594 | 14397          |
| ENSACAG00000028829 | 14398          |
| ENSACAG00000028871 | 14399          |
| ENSACAG00000011148 | 14400          |
| ENSACAG00000021026 | 14401 MMP20    |
| ENSACAG00000024242 | 14402          |
| ENSACAG00000028348 | 14403          |
| ENSACAG00000014033 | 14404 SEZ6L2   |

|                    |                 |
|--------------------|-----------------|
| ENSACAG00000023226 | 14405           |
| ENSACAG00000022289 | 14406           |
| ENSACAG00000008036 | 14407           |
| ENSACAG00000010894 | 14408 SFTP      |
| ENSACAG00000010098 | 14409           |
| ENSACAG00000007772 | 14410 CASR      |
| ENSACAG00000010233 | 14411 GUCY2C    |
| ENSACAG00000007442 | 14412           |
| ENSACAG00000008002 | 14413           |
| ENSACAG00000000982 | 14414 TSGA10    |
| ENSACAG00000011866 | 14415 UGT8      |
| ENSACAG00000009776 | 14416 TMEM169   |
| ENSACAG00000007845 | 14417           |
| ENSACAG00000004213 | 14418 RGS21     |
| ENSACAG00000022392 | 14419           |
| ENSACAG00000016802 | 14420           |
| ENSACAG00000023971 | 14421           |
| ENSACAG00000029072 | 14422           |
| ENSACAG00000017812 | 14423 BAAT      |
| ENSACAG00000013634 | 14424 ZNF541    |
| ENSACAG00000004791 | 14425 PLS1      |
| ENSACAG00000013507 | 14426           |
| ENSACAG00000016042 | 14427 RAC2      |
| ENSACAG00000024935 | 14428 F7        |
| ENSACAG00000013935 | 14429           |
| ENSACAG00000011901 | 14430 PLCH2     |
| ENSACAG00000006023 | 14431           |
| ENSACAG00000016765 | 14432 HCRTR2    |
| ENSACAG00000006702 | 14433 IYD       |
| ENSACAG00000028117 | 14434           |
| ENSACAG00000007856 | 14435           |
| ENSACAG00000001484 | 14436 KIAA1024L |
| ENSACAG00000024269 | 14437 HEMGN     |
| ENSACAG00000012287 | 14438 EPYC      |
| ENSACAG00000028114 | 14439           |
| ENSACAG00000029636 | 14440           |
| ENSACAG00000023305 | 14441           |
| ENSACAG00000023029 | 14442           |
| ENSACAG00000011390 | 14443 SOX11     |
| ENSACAG00000022530 | 14444           |
| ENSACAG00000027034 | 14445           |
| ENSACAG00000026582 | 14446           |



|                    |                |
|--------------------|----------------|
| ENSACAG00000028184 | 14447          |
| ENSACAG00000029377 | 14448          |
| ENSACAG00000007961 | 14449 KRT7     |
| ENSACAG00000022830 | 14450          |
| ENSACAG00000007798 | 14451          |
| ENSACAG00000015814 | 14452 ESR2     |
| ENSACAG00000024947 | 14453          |
| ENSACAG00000027149 | 14454          |
| ENSACAG00000025774 | 14455          |
| ENSACAG00000019414 | 14456 5S_rRNA  |
| ENSACAG00000002469 | 14457 ADIPOQ   |
| ENSACAG00000006354 | 14458 ZAR1     |
| ENSACAG00000022597 | 14459          |
| ENSACAG00000029545 | 14460 TMEM212  |
| ENSACAG00000012822 | 14461 TRPC6    |
| ENSACAG00000013160 | 14462 REC114   |
| ENSACAG00000015500 | 14463 CYSLTR1  |
| ENSACAG00000022603 | 14464          |
| ENSACAG00000003088 | 14465          |
| ENSACAG00000001786 | 14466 ZNF395   |
| ENSACAG00000010844 | 14467 CFAP74   |
| ENSACAG00000011255 | 14468 ISX      |
| ENSACAG00000010802 | 14469          |
| ENSACAG00000026709 | 14470          |
| ENSACAG00000008345 | 14471          |
| ENSACAG00000006404 | 14472 FBXO40   |
| ENSACAG00000028760 | 14473          |
| ENSACAG00000008605 | 14474 CATSPER1 |
| ENSACAG00000007601 | 14475 SLC12A3  |
| ENSACAG00000009691 | 14476          |
| ENSACAG00000001114 | 14477 NMUR1    |
| ENSACAG00000003423 | 14478 SLC22A3  |
| ENSACAG00000015474 | 14479          |
| ENSACAG00000029484 | 14480          |
| ENSACAG00000025573 | 14481          |
| ENSACAG00000027910 | 14482          |
| ENSACAG00000006694 | 14483 DSCAML1  |
| ENSACAG00000010854 | 14484          |
| ENSACAG00000001535 | 14485 NR1I3    |
| ENSACAG00000004440 | 14486 SLITRK6  |
| ENSACAG00000008392 | 14487 KRT80    |
| ENSACAG00000013878 | 14488 TAS1R3   |

|                    |               |
|--------------------|---------------|
| ENSACAG00000011612 | 14489         |
| ENSACAG00000009326 | 14490 HKDC1   |
| ENSACAG00000011158 | 14491 ITGA11  |
| ENSACAG00000016328 | 14492 STAB2   |
| ENSACAG00000022581 | 14493 MUC16   |
| ENSACAG00000004068 | 14494 MSS51   |
| ENSACAG00000029044 | 14495         |
| ENSACAG00000006629 | 14496 POU2AF1 |
| ENSACAG00000008470 | 14497 COLEC10 |
| ENSACAG00000012198 | 14498 SYT10   |
| ENSACAG00000016751 | 14499 THSD1   |
| ENSACAG00000004288 | 14500 OVCH2   |
| ENSACAG00000010363 | 14501 FAM84B  |
| ENSACAG00000015493 | 14502 CAPN3   |
| ENSACAG00000015604 | 14503         |
| ENSACAG00000001215 | 14504         |
| ENSACAG00000012523 | 14505 SHC2    |
| ENSACAG00000027046 | 14506 USP2    |
| ENSACAG00000026043 | 14507         |
| ENSACAG00000009562 | 14508         |
| ENSACAG00000017127 | 14509 LRRC74A |
| ENSACAG00000017872 | 14510 MEP1B   |
| ENSACAG00000008330 | 14511 DKK2    |
| ENSACAG00000000492 | 14512 GAL3ST2 |
| ENSACAG00000024991 | 14513         |
| ENSACAG00000023107 | 14514         |
| ENSACAG00000004935 | 14515         |
| ENSACAG00000006420 | 14516 MARCO   |
| ENSACAG00000005780 | 14517         |
| ENSACAG00000005225 | 14518 CFAP58  |
| ENSACAG00000005435 | 14519 TCFL5   |
| ENSACAG00000006326 | 14520 SLC34A1 |
| ENSACAG00000009022 | 14521 DEPTOR  |
| ENSACAG00000001559 | 14522         |
| ENSACAG00000008748 | 14523 GPR119  |
| ENSACAG00000010893 | 14524 ANGPT4  |
| ENSACAG00000008116 | 14525 VIT     |
| ENSACAG00000013645 | 14526         |
| ENSACAG00000025055 | 14527         |
| ENSACAG00000023166 | 14528         |
| ENSACAG00000026101 | 14529         |
| ENSACAG00000024933 | 14530         |

|                    |               |
|--------------------|---------------|
| ENSACAG00000005012 | 14531         |
| ENSACAG00000012838 | 14532         |
| ENSACAG00000017408 | 14533         |
| ENSACAG00000008673 | 14534 IL17RE  |
| ENSACAG00000006298 | 14535 ELMOD1  |
| ENSACAG00000005350 | 14536 CYP7A1  |
| ENSACAG00000016230 | 14537         |
| ENSACAG00000000763 | 14538 DIRAS2  |
| ENSACAG00000004167 | 14539         |
| ENSACAG00000003192 | 14540         |
| ENSACAG00000008112 | 14541 LVRN    |
| ENSACAG00000011341 | 14542         |
| ENSACAG00000013853 | 14543 SLC5A11 |
| ENSACAG00000021937 | 14544 PPP1R3F |
| ENSACAG00000029433 | 14545 TAC3    |
| ENSACAG00000029384 | 14546         |
| ENSACAG00000005858 | 14547 CABP5   |
| ENSACAG00000005294 | 14548         |
| ENSACAG00000029461 | 14549         |
| ENSACAG00000004580 | 14550 LAMB4   |
| ENSACAG00000016771 | 14551 KCNJ14  |
| ENSACAG00000004620 | 14552 SCG2    |
| ENSACAG00000010614 | 14553         |
| ENSACAG00000008651 | 14554 IL17RC  |
| ENSACAG00000016914 | 14555 SLC35D3 |
| ENSACAG00000029483 | 14556         |
| ENSACAG00000014793 | 14557 KLC3    |
| ENSACAG00000012622 | 14558         |
| ENSACAG00000010312 | 14559 F5      |
| ENSACAG00000017764 | 14560 LIN28A  |
| ENSACAG00000014493 | 14561 SLC15A5 |
| ENSACAG00000007055 | 14562 EIF4E1B |
| ENSACAG00000001737 | 14563 CTRL    |
| ENSACAG00000022035 | 14564         |
| ENSACAG00000028577 | 14565         |
| ENSACAG00000029021 | 14566         |
| ENSACAG00000011215 | 14567 CNGA4   |
| ENSACAG00000027032 | 14568         |
| ENSACAG00000028658 | 14569         |
| ENSACAG00000014040 | 14570 CX3CR1  |
| ENSACAG00000016814 | 14571         |
| ENSACAG00000008933 | 14572 ANKRD31 |

|                    |                |
|--------------------|----------------|
| ENSACAG00000012817 | 14573 ANGPTL5  |
| ENSACAG00000029088 | 14574          |
| ENSACAG00000028737 | 14575          |
| ENSACAG00000012323 | 14576          |
| ENSACAG00000001587 | 14577 SLC6A19  |
| ENSACAG00000007187 | 14578 IL1RAPL1 |
| ENSACAG00000016361 | 14579          |
| ENSACAG00000010182 | 14580          |
| ENSACAG00000010263 | 14581          |
| ENSACAG00000028498 | 14582          |
| ENSACAG00000007924 | 14583 GALR2    |
| ENSACAG00000024637 | 14584          |
| ENSACAG00000000869 | 14585          |
| ENSACAG00000016275 | 14586 CD180    |
| ENSACAG00000000717 | 14587          |
| ENSACAG00000002347 | 14588 PANX2    |
| ENSACAG00000007749 | 14589 GLIPR1   |
| ENSACAG00000006348 | 14590 FGL2     |
| ENSACAG00000012493 | 14591 SLC6A17  |
| ENSACAG00000008259 | 14592 KCNJ4    |
| ENSACAG00000017641 | 14593          |
| ENSACAG00000014594 | 14594          |
| ENSACAG00000027631 | 14595          |
| ENSACAG00000010955 | 14596 HOXC4    |
| ENSACAG00000028406 | 14597 CD96     |
| ENSACAG00000029168 | 14598          |
| ENSACAG00000002396 | 14599 MGAT4D   |
| ENSACAG00000028364 | 14600 SHISA8   |
| ENSACAG00000008760 | 14601 MRVI1    |
| ENSACAG00000016783 | 14602 SSPO     |
| ENSACAG00000028616 | 14603 IGSF5    |
| ENSACAG00000012587 | 14604 AGR2     |
| ENSACAG00000000688 | 14605          |
| ENSACAG00000029193 | 14606          |
| ENSACAG00000014185 | 14607 RFX6     |
| ENSACAG00000007356 | 14608          |
| ENSACAG00000028639 | 14609 TIMD4    |
| ENSACAG00000014083 | 14610 PLCB2    |
| ENSACAG00000016622 | 14611 GRIA2    |
| ENSACAG00000017727 | 14612 PPP1R32  |
| ENSACAG00000001776 | 14613 METRN    |
| ENSACAG00000015658 | 14614 RLN3     |

|                    |               |
|--------------------|---------------|
| ENSACAG00000024140 | 14615         |
| ENSACAG00000022363 | 14616         |
| ENSACAG00000027216 | 14617         |
| ENSACAG00000006913 | 14618         |
| ENSACAG00000023755 | 14619 GPR150  |
| ENSACAG00000014147 | 14620 CA13    |
| ENSACAG00000027135 | 14621         |
| ENSACAG00000001153 | 14622         |
| ENSACAG00000029642 | 14623         |
| ENSACAG00000029647 | 14624 IRX6    |
| ENSACAG00000012333 | 14625 NR1H4   |
| ENSACAG00000003490 | 14626 RBP2    |
| ENSACAG00000017655 | 14627 TJP3    |
| ENSACAG00000006608 | 14628 BTG4    |
| ENSACAG00000011329 | 14629         |
| ENSACAG00000022125 | 14630         |
| ENSACAG00000026813 | 14631         |
| ENSACAG00000004199 | 14632 HSPA12B |
| ENSACAG00000015512 | 14633         |
| ENSACAG00000000443 | 14634 AVPR1A  |
| ENSACAG00000016011 | 14635 SHISA7  |
| ENSACAG00000003357 | 14636 FAM166B |
| ENSACAG00000016442 | 14637 GRM3    |
| ENSACAG00000017808 | 14638 FXD1    |
| ENSACAG00000013283 | 14639 GC      |
| ENSACAG00000022648 | 14640         |
| ENSACAG00000002200 | 14641 MYL2    |
| ENSACAG00000021979 | 14642         |
| ENSACAG00000000036 | 14643         |
| ENSACAG00000011218 | 14644 NUGGC   |
| ENSACAG00000025465 | 14645 IZUMO2  |
| ENSACAG00000017908 | 14646         |
| ENSACAG00000002147 | 14647 NOBOX   |
| ENSACAG00000005354 | 14648         |
| ENSACAG00000008558 | 14649         |
| ENSACAG00000012474 | 14650         |
| ENSACAG00000017612 | 14651         |
| ENSACAG00000022443 | 14652         |
| ENSACAG00000004892 | 14653         |
| ENSACAG00000028271 | 14654 SUSD5   |
| ENSACAG00000002490 | 14655 SPI1    |
| ENSACAG00000004847 | 14656         |

|                    |                |
|--------------------|----------------|
| ENSACAG00000002165 | 14657 FMOD     |
| ENSACAG00000012246 | 14658 KCNS1    |
| ENSACAG00000027788 | 14659          |
| ENSACAG00000020747 | 14660 7SK      |
| ENSACAG00000026157 | 14661          |
| ENSACAG00000008584 | 14662 GNG8     |
| ENSACAG00000011062 | 14663 TYMP     |
| ENSACAG00000007955 | 14664 ITIH4    |
| ENSACAG00000010575 | 14665 GSG1     |
| ENSACAG00000014991 | 14666          |
| ENSACAG00000013410 | 14667 HEY1     |
| ENSACAG00000016518 | 14668 SLC15A1  |
| ENSACAG00000001174 | 14669 SLC25A48 |
| ENSACAG00000016632 | 14670          |
| ENSACAG00000017725 | 14671 LRRC10B  |
| ENSACAG00000006536 | 14672 PDGFRL   |
| ENSACAG00000023545 | 14673          |
| ENSACAG00000001785 | 14674 TMEM52   |
| ENSACAG00000004371 | 14675 PTGER3   |
| ENSACAG00000029140 | 14676          |
| ENSACAG00000017425 | 14677 DMBT1    |
| ENSACAG00000001076 | 14678          |
| ENSACAG00000012945 | 14679 CHRDL1   |
| ENSACAG00000008798 | 14680 ADGRF3   |
| ENSACAG00000005365 | 14681          |
| ENSACAG00000017822 | 14682          |
| ENSACAG00000027070 | 14683          |
| ENSACAG00000005512 | 14684 CHRNA6   |
| ENSACAG00000016719 | 14685 TINAG    |
| ENSACAG00000004949 | 14686          |
| ENSACAG00000028990 | 14687          |
| ENSACAG00000011436 | 14688 TAS1R1   |
| ENSACAG00000003033 | 14689          |
| ENSACAG00000014106 | 14690          |
| ENSACAG00000005622 | 14691          |
| ENSACAG00000025342 | 14692 MISPL    |
| ENSACAG00000016074 | 14693 ENPP7    |
| ENSACAG00000014666 | 14694 KCNK13   |
| ENSACAG00000002931 | 14695 NRSN1    |
| ENSACAG00000014211 | 14696 FRMPD3   |
| ENSACAG00000017167 | 14697          |
| ENSACAG00000029435 | 14698          |

|                    |               |
|--------------------|---------------|
| ENSACAG00000005792 | 14699 GNB3    |
| ENSACAG00000006765 | 14700         |
| ENSACAG00000005397 | 14701 ZBTB38  |
| ENSACAG00000013385 | 14702 DLGAP3  |
| ENSACAG00000009585 | 14703 AKAP3   |
| ENSACAG00000002476 | 14704         |
| ENSACAG00000025588 | 14705         |
| ENSACAG00000001801 | 14706 NOX5    |
| ENSACAG00000011600 | 14707         |
| ENSACAG00000010896 | 14708 DDO     |
| ENSACAG00000022100 | 14709         |
| ENSACAG00000024880 | 14710         |
| ENSACAG00000016672 | 14711 SIX6    |
| ENSACAG00000011289 | 14712 LHX8    |
| ENSACAG00000011047 | 14713 TMEM71  |
| ENSACAG00000003590 | 14714         |
| ENSACAG00000009845 | 14715 NRIP3   |
| ENSACAG00000015706 | 14716         |
| ENSACAG00000008094 | 14717         |
| ENSACAG00000010069 | 14718         |
| ENSACAG00000001828 | 14719 SMTNL2  |
| ENSACAG00000013469 | 14720 SCIN    |
| ENSACAG00000020088 | 14721 7SK     |
| ENSACAG00000028311 | 14722 C8orf22 |
| ENSACAG00000015977 | 14723 RNMTL1  |
| ENSACAG00000029005 | 14724         |
| ENSACAG00000011506 | 14725 ITGB8   |
| ENSACAG00000006937 | 14726 GFRA3   |
| ENSACAG00000006477 | 14727         |
| ENSACAG00000006291 | 14728         |
| ENSACAG00000002548 | 14729 SDR42E1 |
| ENSACAG00000014149 | 14730         |
| ENSACAG00000029211 | 14731 PLEKHS1 |
| ENSACAG00000015402 | 14732 SLC6A5  |
| ENSACAG00000025030 | 14733         |
| ENSACAG00000012148 | 14734 CNGA3   |
| ENSACAG00000005738 | 14735         |
| ENSACAG00000008624 | 14736         |
| ENSACAG00000007059 | 14737 OSR1    |
| ENSACAG00000005898 | 14738         |
| ENSACAG00000010276 | 14739 MMD2    |
| ENSACAG00000014693 | 14740 HAAO    |

|                    |                |
|--------------------|----------------|
| ENSACAG00000017766 | 14741          |
| ENSACAG00000028593 | 14742          |
| ENSACAG00000003022 | 14743 TMPRSS3  |
| ENSACAG00000014071 | 14744 SPACA3   |
| ENSACAG00000027307 | 14745          |
| ENSACAG00000003458 | 14746          |
| ENSACAG00000011229 | 14747          |
| ENSACAG00000002961 | 14748          |
| ENSACAG00000025344 | 14749          |
| ENSACAG00000013189 | 14750          |
| ENSACAG00000003770 | 14751 COL4A4   |
| ENSACAG00000024206 | 14752          |
| ENSACAG00000021159 | 14753 7SK      |
| ENSACAG00000006527 | 14754 PTGFR    |
| ENSACAG00000011342 | 14755          |
| ENSACAG00000022178 | 14756          |
| ENSACAG00000005364 | 14757          |
| ENSACAG00000008060 | 14758 JPH4     |
| ENSACAG00000014169 | 14759 GPRC6A   |
| ENSACAG00000016060 | 14760          |
| ENSACAG00000003008 | 14761 UBASH3A  |
| ENSACAG00000017218 | 14762 DHRS9    |
| ENSACAG00000005346 | 14763          |
| ENSACAG00000010829 | 14764 HOXC13   |
| ENSACAG00000004594 | 14765 ZAR1L    |
| ENSACAG00000009932 | 14766          |
| ENSACAG00000016714 | 14767 PROX2    |
| ENSACAG00000024872 | 14768          |
| ENSACAG00000000294 | 14769 APBA2    |
| ENSACAG00000017803 | 14770 FCHO1    |
| ENSACAG00000029689 | 14771          |
| ENSACAG00000007128 | 14772          |
| ENSACAG00000029608 | 14773          |
| ENSACAG00000022630 | 14774 CCR9     |
| ENSACAG00000023697 | 14775 C16orf96 |
| ENSACAG00000019470 | 14776 7SK      |
| ENSACAG00000016132 | 14777 TNS4     |
| ENSACAG00000006803 | 14778 PTPRZ1   |
| ENSACAG00000011120 | 14779          |
| ENSACAG00000008505 | 14780 NOV      |
| ENSACAG00000028562 | 14781          |
| ENSACAG00000029578 | 14782          |



|                    |              |
|--------------------|--------------|
| ENSACAG00000027868 | 14783 BRINP1 |
| ENSACAG00000014305 | 14784 ASPHD1 |
| ENSACAG00000023284 | 14785        |
| ENSACAG00000020394 | 14786 7SK    |
| ENSACAG00000008091 | 14787        |
| ENSACAG00000005489 | 14788 GUCY2D |
| ENSACAG00000003901 | 14789        |
| ENSACAG00000010516 | 14790 CALB1  |
| ENSACAG00000004614 | 14791        |
| ENSACAG00000010340 | 14792 EGR2   |
| ENSACAG00000006854 | 14793 C8A    |
| ENSACAG00000025717 | 14794        |
| ENSACAG00000028163 | 14795        |
| ENSACAG00000016750 | 14796 TMC8   |
| ENSACAG00000011171 | 14797        |
| ENSACAG00000003878 | 14798        |
| ENSACAG00000000433 | 14799        |
| ENSACAG00000010848 | 14800 HOXC11 |
| ENSACAG00000008100 | 14801        |
| ENSACAG00000007274 | 14802        |
| ENSACAG00000017459 | 14803 TEK    |
| ENSACAG00000015614 | 14804        |
| ENSACAG00000011906 | 14805 STAG3  |
| ENSACAG00000024253 | 14806        |
| ENSACAG00000025511 | 14807        |
| ENSACAG00000009654 | 14808 ATP8B1 |
| ENSACAG00000012459 | 14809 CDH19  |
| ENSACAG00000022418 | 14810        |
| ENSACAG00000008578 | 14811        |
| ENSACAG00000001058 | 14812        |
| ENSACAG00000024105 | 14813        |
| ENSACAG00000006997 | 14814 NWD2   |
| ENSACAG00000009869 | 14815        |
| ENSACAG00000011878 | 14816        |
| ENSACAG00000028713 | 14817 TMEM54 |
| ENSACAG00000026731 | 14818        |
| ENSACAG00000003748 | 14819 ESRP1  |
| ENSACAG00000006465 | 14820 HS3ST2 |
| ENSACAG00000028846 | 14821        |
| ENSACAG00000024024 | 14822        |
| ENSACAG00000003376 | 14823 HEPH   |
| ENSACAG00000011060 | 14824 SHH    |

|                    |               |
|--------------------|---------------|
| ENSACAG00000010126 | 14825         |
| ENSACAG00000013095 | 14826 ELF5    |
| ENSACAG00000017694 | 14827 PIK3R5  |
| ENSACAG00000005579 | 14828 NLGN2   |
| ENSACAG00000003439 | 14829 ARRDC1  |
| ENSACAG00000028781 | 14830         |
| ENSACAG00000024900 | 14831         |
| ENSACAG00000019177 | 14832 7SK     |
| ENSACAG00000024176 | 14833         |
| ENSACAG00000001800 | 14834         |
| ENSACAG00000022656 | 14835         |
| ENSACAG00000012636 | 14836         |
| ENSACAG00000012942 | 14837 RHOBTB3 |
| ENSACAG00000005796 | 14838         |
| ENSACAG00000002212 | 14839         |
| ENSACAG00000029184 | 14840         |
| ENSACAG00000029286 | 14841 oaz3    |
| ENSACAG00000014874 | 14842 FAM57B  |
| ENSACAG00000020445 | 14843 7SK     |
| ENSACAG00000002761 | 14844 DSP     |
| ENSACAG00000014585 | 14845 MSC     |
| ENSACAG00000021035 | 14846 SPTSSB  |
| ENSACAG00000010681 | 14847 DPT     |
| ENSACAG00000029523 | 14848         |
| ENSACAG00000017900 | 14849 BMP4    |
| ENSACAG00000017876 | 14850         |
| ENSACAG00000012229 | 14851 ALDH1A1 |
| ENSACAG00000013496 | 14852 OPN5    |
| ENSACAG00000000811 | 14853 OIT3    |
| ENSACAG00000010212 | 14854 SLC18A2 |
| ENSACAG00000028983 | 14855         |
| ENSACAG00000001073 | 14856 HYDIN   |
| ENSACAG00000021153 | 14857 CLDN25  |
| ENSACAG00000000163 | 14858 NPM2    |
| ENSACAG00000015443 | 14859         |
| ENSACAG00000029362 | 14860 IL17D   |
| ENSACAG00000008057 | 14861 CDO1    |
| ENSACAG00000015539 | 14862         |
| ENSACAG00000013861 | 14863 CNTNAP1 |
| ENSACAG00000027446 | 14864         |
| ENSACAG00000015217 | 14865 CD200   |
| ENSACAG00000026154 | 14866         |

|                    |                |
|--------------------|----------------|
| ENSACAG00000025898 | 14867          |
| ENSACAG00000007623 | 14868          |
| ENSACAG00000029351 | 14869          |
| ENSACAG00000012569 | 14870 ETNPPL   |
| ENSACAG00000005203 | 14871          |
| ENSACAG00000003723 | 14872 FAM69C   |
| ENSACAG00000029531 | 14873 SELPLG   |
| ENSACAG00000017732 | 14874 FOXF2    |
| ENSACAG00000010932 | 14875 CFP      |
| ENSACAG00000009481 | 14876 RCSD1    |
| ENSACAG00000008114 | 14877          |
| ENSACAG00000013069 | 14878 NPVF     |
| ENSACAG00000017136 | 14879 ZDHHC22  |
| ENSACAG00000022408 | 14880          |
| ENSACAG00000001185 | 14881 SLC28A3  |
| ENSACAG00000011927 | 14882          |
| ENSACAG00000025209 | 14883          |
| ENSACAG00000025821 | 14884          |
| ENSACAG00000003096 | 14885 CABP1    |
| ENSACAG00000028291 | 14886 C21orf58 |
| ENSACAG00000016103 | 14887 SLC2A2   |
| ENSACAG00000016993 | 14888          |
| ENSACAG00000017984 | 14889          |
| ENSACAG00000002559 | 14890          |
| ENSACAG00000011440 | 14891 EPGN     |
| ENSACAG00000000544 | 14892          |
| ENSACAG00000025845 | 14893          |
| ENSACAG00000025106 | 14894          |
| ENSACAG00000011928 | 14895 FGF8     |
| ENSACAG00000029425 | 14896          |
| ENSACAG00000017775 | 14897 HAPLN4   |
| ENSACAG00000005852 | 14898          |
| ENSACAG00000003741 | 14899 C16orf45 |
| ENSACAG00000016522 | 14900 CACNG6   |
| ENSACAG00000007521 | 14901 GFAP     |
| ENSACAG00000012389 | 14902          |
| ENSACAG00000017783 | 14903 CD6      |
| ENSACAG00000005111 | 14904 TBX5     |
| ENSACAG00000029465 | 14905          |
| ENSACAG00000027729 | 14906          |
| ENSACAG00000015740 | 14907 DCHS2    |
| ENSACAG00000028895 | 14908          |

|                    |                |
|--------------------|----------------|
| ENSACAG00000017824 | 14909          |
| ENSACAG00000026313 | 14910          |
| ENSACAG00000009321 | 14911          |
| ENSACAG00000000057 | 14912 TPH1     |
| ENSACAG00000015121 | 14913 SLC26A4  |
| ENSACAG00000017153 | 14914 LRP2     |
| ENSACAG00000027987 | 14915          |
| ENSACAG00000024417 | 14916 DMP1     |
| ENSACAG00000016383 | 14917          |
| ENSACAG00000015228 | 14918 ABCG5    |
| ENSACAG00000016977 | 14919 RGS10    |
| ENSACAG00000016839 | 14920 PLPPR2   |
| ENSACAG00000008838 | 14921          |
| ENSACAG00000012309 | 14922          |
| ENSACAG00000005166 | 14923 MYCBPAP  |
| ENSACAG00000007984 | 14924          |
| ENSACAG00000027052 | 14925 MPL      |
| ENSACAG00000007889 | 14926 CDC42BPG |
| ENSACAG00000006347 | 14927 SEMA6C   |
| ENSACAG00000026777 | 14928          |
| ENSACAG00000006173 | 14929          |
| ENSACAG00000014029 | 14930 AMDHD1   |
| ENSACAG00000006985 | 14931          |
| ENSACAG00000003790 | 14932          |
| ENSACAG00000014766 | 14933 ANKRD55  |
| ENSACAG00000010204 | 14934 ALDH8A1  |
| ENSACAG00000014320 | 14935          |
| ENSACAG00000014346 | 14936          |
| ENSACAG00000001860 | 14937 NDRG4    |
| ENSACAG00000028626 | 14938          |
| ENSACAG00000005903 | 14939          |
| ENSACAG00000006581 | 14940 NIPAL1   |
| ENSACAG00000015043 | 14941 GABRA6   |
| ENSACAG00000026563 | 14942 EXOC3L2  |
| ENSACAG00000012798 | 14943 SLC39A8  |
| ENSACAG00000028131 | 14944 PODN     |
| ENSACAG00000022200 | 14945          |
| ENSACAG00000028581 | 14946          |
| ENSACAG00000015599 | 14947 RBM46    |
| ENSACAG00000006760 | 14948 HHATL    |
| ENSACAG00000023365 | 14949          |
| ENSACAG00000015778 | 14950 C1QL4    |

|                    |                |
|--------------------|----------------|
| ENSACAG00000014464 | 14951          |
| ENSACAG00000009850 | 14952          |
| ENSACAG00000008227 | 14953 WNT10B   |
| ENSACAG00000028455 | 14954          |
| ENSACAG00000010668 | 14955          |
| ENSACAG00000014544 | 14956          |
| ENSACAG00000020325 | 14957 7SK      |
| ENSACAG00000029618 | 14958          |
| ENSACAG00000016886 | 14959 EPOR     |
| ENSACAG00000011588 | 14960 EMILIN3  |
| ENSACAG00000002422 | 14961 LURAP1   |
| ENSACAG00000012167 | 14962 BMX      |
| ENSACAG00000007734 | 14963 CYTIP    |
| ENSACAG00000023576 | 14964          |
| ENSACAG00000004148 | 14965 ELF3     |
| ENSACAG00000012898 | 14966 LPAR3    |
| ENSACAG00000026142 | 14967          |
| ENSACAG00000005336 | 14968 TFAP2D   |
| ENSACAG00000007590 | 14969 LRRC55   |
| ENSACAG00000022425 | 14970          |
| ENSACAG00000014981 | 14971          |
| ENSACAG00000010980 | 14972          |
| ENSACAG00000022477 | 14973 MYPOP    |
| ENSACAG00000001221 | 14974 KCNG2    |
| ENSACAG00000005686 | 14975          |
| ENSACAG00000017063 | 14976 GPD1     |
| ENSACAG00000017115 | 14977 TMEM86B  |
| ENSACAG00000017675 | 14978          |
| ENSACAG00000017507 | 14979 GNA15    |
| ENSACAG00000012061 | 14980 ASPDH    |
| ENSACAG00000017762 | 14981 ARHGEF16 |
| ENSACAG00000014717 | 14982 DLX5     |
| ENSACAG00000008363 | 14983 MYO3A    |
| ENSACAG00000020579 | 14984 7SK      |
| ENSACAG00000026466 | 14985          |
| ENSACAG00000021995 | 14986          |
| ENSACAG00000015162 | 14987 INSRR    |
| ENSACAG00000029353 | 14988          |
| ENSACAG00000029263 | 14989          |
| ENSACAG00000010115 | 14990 INPP5J   |
| ENSACAG00000002537 | 14991          |
| ENSACAG00000008193 | 14992 GAD2     |

|                    |                |
|--------------------|----------------|
| ENSACAG00000005100 | 14993 OPRD1    |
| ENSACAG00000015196 | 14994 NLGN3    |
| ENSACAG00000008608 | 14995          |
| ENSACAG00000002007 | 14996 C1QTNF5  |
| ENSACAG00000025451 | 14997          |
| ENSACAG00000000660 | 14998          |
| ENSACAG00000020808 | 14999 7SK      |
| ENSACAG00000013060 | 15000 TTC9B    |
| ENSACAG00000013311 | 15001 KCNA7    |
| ENSACAG00000007390 | 15002 OTOL1    |
| ENSACAG00000009906 | 15003          |
| ENSACAG00000017524 | 15004          |
| ENSACAG00000026668 | 15005          |
| ENSACAG00000025879 | 15006          |
| ENSACAG00000025687 | 15007          |
| ENSACAG00000011911 | 15008 SLC25A31 |
| ENSACAG00000008587 | 15009 ARHGEF38 |
| ENSACAG00000008519 | 15010 FAM131C  |
| ENSACAG00000006303 | 15011 WAS      |
| ENSACAG00000011318 | 15012 WDR78    |
| ENSACAG00000017537 | 15013 DMRTA1   |
| ENSACAG00000028385 | 15014 RUFY4    |
| ENSACAG00000029243 | 15015          |
| ENSACAG00000004662 | 15016 UPK1B    |
| ENSACAG00000012672 | 15017 WNT10A   |
| ENSACAG00000010563 | 15018 PAX1     |
| ENSACAG00000017499 | 15019          |
| ENSACAG00000026562 | 15020          |
| ENSACAG00000015283 | 15021          |
| ENSACAG00000017953 | 15022          |
| ENSACAG00000025478 | 15023          |
| ENSACAG00000029418 | 15024          |
| ENSACAG00000000401 | 15025 ACTL6B   |
| ENSACAG00000005422 | 15026 REM1     |
| ENSACAG00000027782 | 15027 C7orf31  |
| ENSACAG00000004904 | 15028 HES7     |
| ENSACAG00000004392 | 15029 CIDEB    |
| ENSACAG00000007087 | 15030 MFAP4    |
| ENSACAG00000014736 | 15031 CCM2L    |
| ENSACAG00000011954 | 15032          |
| ENSACAG00000027766 | 15033 KLHL33   |
| ENSACAG00000011689 | 15034          |

|                    |               |
|--------------------|---------------|
| ENSACAG00000023839 | 15035         |
| ENSACAG00000020707 | 15036 7SK     |
| ENSACAG00000023320 | 15037         |
| ENSACAG00000000438 | 15038         |
| ENSACAG00000025068 | 15039         |
| ENSACAG00000016498 | 15040         |
| ENSACAG00000001189 | 15041 GRIN1   |
| ENSACAG00000006104 | 15042         |
| ENSACAG00000016475 | 15043         |
| ENSACAG00000006521 | 15044 HOXB2   |
| ENSACAG00000021980 | 15045 CIITA   |
| ENSACAG00000003524 | 15046 CNNM1   |
| ENSACAG00000016803 | 15047 HNF4A   |
| ENSACAG00000001980 | 15048 MFRP    |
| ENSACAG00000000273 | 15049         |
| ENSACAG00000015085 | 15050 PEAR1   |
| ENSACAG00000010841 | 15051 SLC30A8 |
| ENSACAG00000010101 | 15052         |
| ENSACAG00000011299 | 15053         |
| ENSACAG00000011854 | 15054 GPR132  |
| ENSACAG00000026852 | 15055 TIGD3   |
| ENSACAG00000002264 | 15056         |
| ENSACAG00000001908 | 15057 RAD9B   |
| ENSACAG00000010339 | 15058 EMX2    |
| ENSACAG00000003541 | 15059         |
| ENSACAG00000005075 | 15060 ALOX5AP |
| ENSACAG00000003429 | 15061 HPSE2   |
| ENSACAG00000025070 | 15062         |
| ENSACAG00000003850 | 15063 EFEMP1  |
| ENSACAG00000000948 | 15064 SLAIN1  |
| ENSACAG00000014102 | 15065         |
| ENSACAG00000012018 | 15066 CA12    |
| ENSACAG00000001182 | 15067 SDR42E2 |
| ENSACAG00000018551 | 15068 7SK     |
| ENSACAG00000015236 | 15069 SLC26A3 |
| ENSACAG00000025473 | 15070         |
| ENSACAG00000006974 | 15071 GPR149  |
| ENSACAG00000025654 | 15072         |
| ENSACAG00000016346 | 15073         |
| ENSACAG00000015274 | 15074 SOX10   |
| ENSACAG00000011358 | 15075         |
| ENSACAG00000023670 | 15076         |

|                    |                |
|--------------------|----------------|
| ENSACAG00000013278 | 15077          |
| ENSACAG00000006980 | 15078 CDH24    |
| ENSACAG00000016704 | 15079 FGD2     |
| ENSACAG00000028418 | 15080 MS4A15   |
| ENSACAG00000022494 | 15081          |
| ENSACAG00000020897 | 15082 7SK      |
| ENSACAG00000017150 | 15083 TNNI3    |
| ENSACAG00000003147 | 15084 SPTBN4   |
| ENSACAG00000011150 | 15085 ATP6AP1L |
| ENSACAG00000007869 | 15086 FOXA3    |
| ENSACAG00000029510 | 15087          |
| ENSACAG00000024870 | 15088          |
| ENSACAG00000003666 | 15089          |
| ENSACAG00000026714 | 15090          |
| ENSACAG00000010941 | 15091 SLC22A16 |
| ENSACAG00000013819 | 15092          |
| ENSACAG00000014644 | 15093 FOLH1    |
| ENSACAG00000010973 | 15094          |
| ENSACAG00000027882 | 15095          |
| ENSACAG00000000851 | 15096 ASB15    |
| ENSACAG00000005129 | 15097          |
| ENSACAG00000023654 | 15098          |
| ENSACAG00000010347 | 15099 CLEC3A   |
| ENSACAG00000002068 | 15100          |
| ENSACAG00000017086 | 15101          |
| ENSACAG00000022254 | 15102          |
| ENSACAG00000017533 | 15103          |
| ENSACAG00000000930 | 15104 SLC18A1  |
| ENSACAG00000008632 | 15105          |
| ENSACAG00000028652 | 15106          |
| ENSACAG00000013362 | 15107          |
| ENSACAG00000014422 | 15108 OPN4     |
| ENSACAG00000025242 | 15109 CCDC129  |
| ENSACAG00000024620 | 15110          |
| ENSACAG00000013396 | 15111 DEGS2    |
| ENSACAG00000016525 | 15112 MIP      |
| ENSACAG00000028716 | 15113          |
| ENSACAG00000011729 | 15114 CD226    |
| ENSACAG00000013793 | 15115 CHMP4C   |
| ENSACAG00000000090 | 15116          |
| ENSACAG00000029624 | 15117          |
| ENSACAG00000023601 | 15118          |



|                    |               |
|--------------------|---------------|
| ENSACAG00000005131 | 15119 PYGM    |
| ENSACAG00000011752 | 15120         |
| ENSACAG00000007789 | 15121         |
| ENSACAG00000000114 | 15122         |
| ENSACAG00000006253 | 15123         |
| ENSACAG00000002162 | 15124         |
| ENSACAG00000029459 | 15125         |
| ENSACAG00000004263 | 15126 BPIFB4  |
| ENSACAG00000022614 | 15127         |
| ENSACAG00000023884 | 15128         |
| ENSACAG00000011727 | 15129 CAPN12  |
| ENSACAG00000021966 | 15130         |
| ENSACAG00000003260 | 15131 FABP6   |
| ENSACAG00000002404 | 15132         |
| ENSACAG00000006633 | 15133         |
| ENSACAG00000015767 | 15134 LRRC31  |
| ENSACAG00000015833 | 15135         |
| ENSACAG00000028840 | 15136         |
| ENSACAG00000011775 | 15137 MACC1   |
| ENSACAG00000026238 | 15138         |
| ENSACAG00000024806 | 15139         |
| ENSACAG00000009704 | 15140 SCUBE2  |
| ENSACAG00000011059 | 15141         |
| ENSACAG00000024291 | 15142         |
| ENSACAG00000029670 | 15143         |
| ENSACAG00000027324 | 15144         |
| ENSACAG00000001307 | 15145 FGD3    |
| ENSACAG00000015757 | 15146         |
| ENSACAG00000001187 | 15147 SNTN    |
| ENSACAG00000008752 | 15148 MYO1G   |
| ENSACAG00000029622 | 15149         |
| ENSACAG00000029059 | 15150         |
| ENSACAG00000027439 | 15151         |
| ENSACAG00000001256 | 15152 FOXA1   |
| ENSACAG00000029556 | 15153 C1QTNF1 |
| ENSACAG00000010153 | 15154 EGF     |
| ENSACAG00000023895 | 15155         |
| ENSACAG00000011231 | 15156         |
| ENSACAG00000006735 | 15157         |
| ENSACAG00000006138 | 15158         |
| ENSACAG00000001849 | 15159 NPTX2   |
| ENSACAG00000005375 | 15160         |

|                    |                 |
|--------------------|-----------------|
| ENSACAG00000005421 | 15161           |
| ENSACAG00000002473 | 15162           |
| ENSACAG00000026296 | 15163           |
| ENSACAG00000003269 | 15164           |
| ENSACAG00000029220 | 15165           |
| ENSACAG00000027346 | 15166           |
| ENSACAG00000025390 | 15167           |
| ENSACAG00000010927 | 15168           |
| ENSACAG00000011641 | 15169           |
| ENSACAG00000022966 | 15170 BPIFB3    |
| ENSACAG00000027060 | 15171           |
| ENSACAG00000009942 | 15172 OSMR      |
| ENSACAG00000012460 | 15173 DGAT2     |
| ENSACAG00000012960 | 15174 GAL3ST3   |
| ENSACAG00000009349 | 15175 ADCY4     |
| ENSACAG00000029476 | 15176           |
| ENSACAG00000013926 | 15177           |
| ENSACAG00000017977 | 15178           |
| ENSACAG00000013633 | 15179           |
| ENSACAG00000026899 | 15180           |
| ENSACAG00000001949 | 15181 EDAR      |
| ENSACAG00000015266 | 15182           |
| ENSACAG00000029643 | 15183           |
| ENSACAG00000000977 | 15184 SLC26A6   |
| ENSACAG00000001475 | 15185 TNFRSF13B |
| ENSACAG00000014107 | 15186 FBN3      |
| ENSACAG00000011496 | 15187 HSD17B2   |
| ENSACAG00000013620 | 15188           |
| ENSACAG00000006907 | 15189 CYP26A1   |
| ENSACAG00000016554 | 15190 SEMA6B    |
| ENSACAG00000004887 | 15191           |
| ENSACAG00000010521 | 15192           |
| ENSACAG00000004139 | 15193 SRRM4     |
| ENSACAG00000004377 | 15194           |
| ENSACAG00000022986 | 15195 ZBTB7B    |
| ENSACAG00000029391 | 15196 AREG      |
| ENSACAG00000006076 | 15197 ACSBG1    |
| ENSACAG00000006155 | 15198           |
| ENSACAG00000012745 | 15199           |
| ENSACAG00000016930 | 15200 DHRS7C    |
| ENSACAG00000015707 | 15201 ARHGEF37  |
| ENSACAG00000000322 | 15202           |

|                    |               |
|--------------------|---------------|
| ENSACAG00000014527 | 15203 SHBG    |
| ENSACAG00000017487 | 15204 SLCO1C1 |
| ENSACAG00000011159 | 15205         |
| ENSACAG00000014890 | 15206 XK      |
| ENSACAG00000026933 | 15207         |
| ENSACAG00000018277 | 15208 7SK     |
| ENSACAG00000002118 | 15209 DCDC1   |
| ENSACAG00000001580 | 15210 NPR3    |
| ENSACAG00000001398 | 15211 MUC1    |
| ENSACAG00000007466 | 15212 CLRN3   |
| ENSACAG00000015030 | 15213         |
| ENSACAG00000012407 | 15214 USP35   |
| ENSACAG00000006376 | 15215 ADRA1A  |
| ENSACAG00000027120 | 15216         |
| ENSACAG00000008999 | 15217         |
| ENSACAG00000009272 | 15218 GABRR3  |
| ENSACAG00000022023 | 15219         |
| ENSACAG00000001536 | 15220         |
| ENSACAG00000004826 | 15221 AGTR2   |
| ENSACAG00000000613 | 15222 KEL     |
| ENSACAG00000013578 | 15223         |
| ENSACAG00000014076 | 15224         |
| ENSACAG00000024537 | 15225         |
| ENSACAG00000029196 | 15226         |
| ENSACAG00000021110 | 15227         |
| ENSACAG00000012038 | 15228 CELA1   |
| ENSACAG00000014646 | 15229 CDHR3   |
| ENSACAG00000001426 | 15230 LCT     |
| ENSACAG00000021039 | 15231         |
| ENSACAG00000017828 | 15232 HPN     |
| ENSACAG00000007678 | 15233         |
| ENSACAG00000022044 | 15234 ATP13A4 |
| ENSACAG00000028446 | 15235         |
| ENSACAG00000006772 | 15236 PLLP    |
| ENSACAG00000012490 | 15237 KCNQ4   |
| ENSACAG00000000274 | 15238 ADPRHL1 |
| ENSACAG00000029443 | 15239         |
| ENSACAG00000012189 | 15240         |
| ENSACAG00000005159 | 15241 MAP1A   |
| ENSACAG00000024863 | 15242 DACT3   |
| ENSACAG00000005690 | 15243 GPM6A   |
| ENSACAG00000011413 | 15244 FAM107A |

|                    |               |
|--------------------|---------------|
| ENSACAG00000026659 | 15245         |
| ENSACAG00000005813 | 15246 MSANTD1 |
| ENSACAG00000014091 | 15247         |
| ENSACAG00000005811 | 15248 GATA2   |
| ENSACAG00000011918 | 15249         |
| ENSACAG00000015629 | 15250         |
| ENSACAG00000007402 | 15251 IL18R1  |
| ENSACAG00000006243 | 15252 RAB39A  |
| ENSACAG00000003899 | 15253 EDNRA   |
| ENSACAG00000014375 | 15254 ATP1B2  |
| ENSACAG00000014700 | 15255         |
| ENSACAG00000008496 | 15256 MAL2    |
| ENSACAG00000017259 | 15257         |
| ENSACAG00000014059 | 15258 DISP2   |
| ENSACAG00000002508 | 15259 LHX1    |
| ENSACAG00000003682 | 15260 ZNF474  |
| ENSACAG00000025118 | 15261 FAM109A |
| ENSACAG00000022723 | 15262 EPHB2   |
| ENSACAG00000014943 | 15263         |
| ENSACAG00000009152 | 15264         |
| ENSACAG00000010281 | 15265         |
| ENSACAG00000000085 | 15266 ST8SIA2 |
| ENSACAG00000012691 | 15267 TSHZ2   |
| ENSACAG00000009475 | 15268 FGF6    |
| ENSACAG00000004193 | 15269 CPN1    |
| ENSACAG00000024508 | 15270 CYP19A1 |
| ENSACAG00000028587 | 15271         |
| ENSACAG00000003594 | 15272 VSIG4   |
| ENSACAG00000001579 | 15273 HPX     |
| ENSACAG00000014390 | 15274 GJA10   |
| ENSACAG00000006787 | 15275 CCDC13  |
| ENSACAG00000011182 | 15276 TLX1    |
| ENSACAG00000010638 | 15277         |
| ENSACAG00000013086 | 15278 KCNF1   |
| ENSACAG00000028503 | 15279         |
| ENSACAG00000025088 | 15280 MTL5    |
| ENSACAG00000028069 | 15281         |
| ENSACAG00000005429 | 15282 PTPN11  |
| ENSACAG00000002547 | 15283 KCTD19  |
| ENSACAG00000002770 | 15284 TRPM1   |
| ENSACAG00000024353 | 15285         |
| ENSACAG00000024767 | 15286         |

|                    |                |
|--------------------|----------------|
| ENSACAG00000011166 | 15287 BLK      |
| ENSACAG00000026254 | 15288          |
| ENSACAG00000025032 | 15289          |
| ENSACAG00000002502 | 15290 NT5C1A   |
| ENSACAG00000026195 | 15291          |
| ENSACAG00000008700 | 15292          |
| ENSACAG00000006153 | 15293          |
| ENSACAG00000002708 | 15294          |
| ENSACAG00000005782 | 15295 DNASE2B  |
| ENSACAG00000010197 | 15296 VAX1     |
| ENSACAG00000004577 | 15297 TAGAP    |
| ENSACAG00000017231 | 15298          |
| ENSACAG00000016469 | 15299          |
| ENSACAG00000024296 | 15300 IFFO1    |
| ENSACAG00000027124 | 15301 SHROOM1  |
| ENSACAG00000006851 | 15302 C1orf168 |
| ENSACAG00000028060 | 15303          |
| ENSACAG00000012547 | 15304 DDIT4L   |
| ENSACAG00000004044 | 15305          |
| ENSACAG00000029232 | 15306          |
| ENSACAG00000001921 | 15307 DNASE1L3 |
| ENSACAG00000022988 | 15308          |
| ENSACAG00000029488 | 15309          |
| ENSACAG00000009168 | 15310 KCNJ6    |
| ENSACAG00000009783 | 15311 CD101    |
| ENSACAG00000002155 | 15312 RASEF    |
| ENSACAG00000000452 | 15313 SRRM3    |
| ENSACAG00000006979 | 15314 WNT16    |
| ENSACAG00000013854 | 15315 CYP21A2  |
| ENSACAG00000004625 | 15316          |
| ENSACAG00000016924 | 15317 AQP6     |
| ENSACAG00000006951 | 15318 PATL2    |
| ENSACAG00000001859 | 15319          |
| ENSACAG00000023167 | 15320 DNHD1    |
| ENSACAG00000001229 | 15321          |
| ENSACAG00000001282 | 15322          |
| ENSACAG00000006883 | 15323          |
| ENSACAG00000016435 | 15324          |
| ENSACAG00000024889 | 15325          |
| ENSACAG00000012316 | 15326 FRK      |
| ENSACAG00000023270 | 15327          |
| ENSACAG00000023155 | 15328          |

|                    |                |
|--------------------|----------------|
| ENSACAG00000028845 | 15329          |
| ENSACAG00000013067 | 15330          |
| ENSACAG00000016990 | 15331 BRSK1    |
| ENSACAG00000029304 | 15332          |
| ENSACAG00000008441 | 15333 AQP2     |
| ENSACAG00000024168 | 15334          |
| ENSACAG00000009188 | 15335 FLT3     |
| ENSACAG00000012105 | 15336 FAM180A  |
| ENSACAG00000010676 | 15337          |
| ENSACAG00000001138 | 15338          |
| ENSACAG00000003897 | 15339 CDH26    |
| ENSACAG00000028381 | 15340 C2orf73  |
| ENSACAG00000012845 | 15341 FAM166A  |
| ENSACAG00000002234 | 15342 GJB6     |
| ENSACAG00000005096 | 15343 SLCO4A1  |
| ENSACAG00000015397 | 15344 LRIT1    |
| ENSACAG00000028533 | 15345          |
| ENSACAG00000028542 | 15346          |
| ENSACAG00000023710 | 15347          |
| ENSACAG00000010809 | 15348 FBXO16   |
| ENSACAG00000027878 | 15349          |
| ENSACAG00000021936 | 15350          |
| ENSACAG00000024676 | 15351          |
| ENSACAG00000017116 | 15352 PTPRH    |
| ENSACAG00000024325 | 15353          |
| ENSACAG00000007959 | 15354          |
| ENSACAG00000008872 | 15355 RPL3L    |
| ENSACAG00000029237 | 15356          |
| ENSACAG00000013156 | 15357          |
| ENSACAG00000017904 | 15358          |
| ENSACAG00000011493 | 15359 PDYN     |
| ENSACAG00000026791 | 15360          |
| ENSACAG00000016739 | 15361          |
| ENSACAG00000001147 | 15362 CCDC63   |
| ENSACAG00000003467 | 15363 T        |
| ENSACAG00000029486 | 15364          |
| ENSACAG00000001526 | 15365 AIF1L    |
| ENSACAG00000006319 | 15366 NAALADL1 |
| ENSACAG00000012981 | 15367          |
| ENSACAG00000029205 | 15368          |
| ENSACAG00000024355 | 15369          |
| ENSACAG00000003488 | 15370 GRIK5    |

|                    |               |
|--------------------|---------------|
| ENSACAG00000010128 | 15371 FGF5    |
| ENSACAG00000013256 | 15372 MEP1A   |
| ENSACAG00000017442 | 15373 SLCO1A2 |
| ENSACAG00000010860 | 15374         |
| ENSACAG00000006935 | 15375 WNT3A   |
| ENSACAG00000014294 | 15376         |
| ENSACAG00000002323 | 15377         |
| ENSACAG00000011156 | 15378 FAM167A |
| ENSACAG00000028465 | 15379         |
| ENSACAG00000017570 | 15380 CLDN15  |
| ENSACAG00000002443 | 15381 HPCAL4  |
| ENSACAG00000026610 | 15382         |
| ENSACAG00000025145 | 15383 OTOF    |
| ENSACAG00000022828 | 15384         |
| ENSACAG00000012613 | 15385         |
| ENSACAG00000013093 | 15386 GDAP1   |
| ENSACAG00000001460 | 15387 PTPRB   |
| ENSACAG00000012121 | 15388 SLC13A4 |
| ENSACAG00000014662 | 15389         |
| ENSACAG00000010457 | 15390 ZAN     |
| ENSACAG00000001319 | 15391 CYP2W1  |
| ENSACAG00000011725 | 15392         |
| ENSACAG00000004248 | 15393         |
| ENSACAG00000025367 | 15394         |
| ENSACAG00000012839 | 15395 SLC38A8 |
| ENSACAG00000027747 | 15396 RP1L1   |
| ENSACAG00000009934 | 15397         |
| ENSACAG00000008517 | 15398         |
| ENSACAG00000008931 | 15399 MSLNL   |
| ENSACAG00000008823 | 15400 HCK     |
| ENSACAG00000003883 | 15401 PLPPR4  |
| ENSACAG00000023543 | 15402         |
| ENSACAG00000004875 | 15403         |
| ENSACAG00000001105 | 15404 KCNK1   |
| ENSACAG00000015384 | 15405 RGR     |
| ENSACAG00000005818 | 15406 OTX1    |
| ENSACAG00000016927 | 15407 ALLC    |
| ENSACAG00000005172 | 15408 IHH     |
| ENSACAG00000013792 | 15409         |
| ENSACAG00000017440 | 15410 IAPP    |
| ENSACAG00000010816 | 15411         |
| ENSACAG00000022464 | 15412         |

|                    |               |
|--------------------|---------------|
| ENSACAG00000010748 | 15413         |
| ENSACAG00000024453 | 15414         |
| ENSACAG00000029508 | 15415         |
| ENSACAG00000026939 | 15416         |
| ENSACAG00000010764 | 15417 P2RX6   |
| ENSACAG00000005932 | 15418 GPR162  |
| ENSACAG00000026504 | 15419         |
| ENSACAG00000008538 | 15420         |
| ENSACAG00000028492 | 15421 EHF     |
| ENSACAG00000006964 | 15422         |
| ENSACAG00000011991 | 15423         |
| ENSACAG00000008686 | 15424 DUPD1   |
| ENSACAG00000028794 | 15425         |
| ENSACAG00000011383 | 15426 FAM3D   |
| ENSACAG00000015462 | 15427 HIP1    |
| ENSACAG00000025402 | 15428         |
| ENSACAG00000004528 | 15429 SLC22A7 |
| ENSACAG00000012354 | 15430 NOTCH4  |
| ENSACAG00000024471 | 15431         |
| ENSACAG00000029318 | 15432         |
| ENSACAG00000007500 | 15433 LAMP3   |
| ENSACAG00000010879 | 15434         |
| ENSACAG00000012628 | 15435         |
| ENSACAG00000024825 | 15436         |
| ENSACAG00000015798 | 15437 DNAJC22 |
| ENSACAG00000022021 | 15438         |
| ENSACAG00000025732 | 15439         |
| ENSACAG00000029043 | 15440 NFAM1   |
| ENSACAG00000029183 | 15441         |
| ENSACAG00000028070 | 15442         |
| ENSACAG00000017314 | 15443 SLC17A7 |
| ENSACAG00000016108 | 15444         |
| ENSACAG00000024440 | 15445         |
| ENSACAG00000022167 | 15446         |
| ENSACAG00000028720 | 15447         |
| ENSACAG00000010543 | 15448         |
| ENSACAG00000024695 | 15449         |
| ENSACAG00000024648 | 15450         |
| ENSACAG00000002910 | 15451         |
| ENSACAG00000028463 | 15452         |
| ENSACAG00000028623 | 15453         |
| ENSACAG00000029447 | 15454         |



|                    |                |
|--------------------|----------------|
| ENSACAG00000014418 | 15455          |
| ENSACAG00000015431 | 15456 KCNA1    |
| ENSACAG00000025245 | 15457          |
| ENSACAG00000001456 | 15458          |
| ENSACAG00000029124 | 15459          |
| ENSACAG00000027036 | 15460 TTLL2    |
| ENSACAG00000028986 | 15461          |
| ENSACAG00000008151 | 15462          |
| ENSACAG00000017162 | 15463          |
| ENSACAG00000017158 | 15464 NGB      |
| ENSACAG00000028357 | 15465          |
| ENSACAG00000006990 | 15466 DTHD1    |
| ENSACAG00000001300 | 15467          |
| ENSACAG00000008059 | 15468 EMX1     |
| ENSACAG00000028359 | 15469          |
| ENSACAG00000015941 | 15470 CBLN4    |
| ENSACAG00000022518 | 15471          |
| ENSACAG00000008973 | 15472 PNCK     |
| ENSACAG00000024612 | 15473          |
| ENSACAG00000027810 | 15474          |
| ENSACAG00000000939 | 15475 ADAD2    |
| ENSACAG00000015927 | 15476 ZNF804B  |
| ENSACAG00000007981 | 15477 IGSF10   |
| ENSACAG00000023203 | 15478 IL12RB1  |
| ENSACAG00000006467 | 15479          |
| ENSACAG00000024818 | 15480          |
| ENSACAG00000012339 | 15481 ALDOC    |
| ENSACAG00000005300 | 15482 PENK     |
| ENSACAG00000028489 | 15483 C1orf194 |
| ENSACAG00000026846 | 15484          |
| ENSACAG00000002426 | 15485 SLC5A7   |
| ENSACAG00000010172 | 15486 PRKG2    |
| ENSACAG00000008140 | 15487          |
| ENSACAG00000029614 | 15488          |
| ENSACAG00000009214 | 15489 HTR3A    |
| ENSACAG00000005192 | 15490 CCDC108  |
| ENSACAG00000028848 | 15491          |
| ENSACAG00000025710 | 15492          |
| ENSACAG00000029017 | 15493 HTR7     |
| ENSACAG00000016956 | 15494          |
| ENSACAG00000003334 | 15495 CDX2     |
| ENSACAG00000022121 | 15496          |

|                     |               |
|---------------------|---------------|
| ENSACAG00000009958  | 15497         |
| ENSACAG00000002353  | 15498         |
| ENSACAG00000002401  | 15499 DMRT3   |
| ENSACAG000000017640 | 15500         |
| ENSACAG000000023490 | 15501         |
| ENSACAG00000000884  | 15502         |
| ENSACAG000000016963 | 15503 ACE2    |
| ENSACAG000000022131 | 15504         |
| ENSACAG000000015589 | 15505         |
| ENSACAG000000029628 | 15506         |
| ENSACAG000000024500 | 15507         |
| ENSACAG000000011833 | 15508 RBM47   |
| ENSACAG000000029601 | 15509         |
| ENSACAG000000020450 | 15510 7SK     |
| ENSACAG000000013376 | 15511 NPFFR2  |
| ENSACAG000000008726 | 15512 ENTPD8  |
| ENSACAG000000004553 | 15513         |
| ENSACAG000000010530 | 15514         |
| ENSACAG000000017484 | 15515         |
| ENSACAG000000000874 | 15516         |
| ENSACAG000000015142 | 15517 NKX2-5  |
| ENSACAG000000029682 | 15518         |
| ENSACAG000000024163 | 15519 GNGT2   |
| ENSACAG000000000779 | 15520         |
| ENSACAG000000016243 | 15521 CTCFL   |
| ENSACAG000000028563 | 15522         |
| ENSACAG000000008120 | 15523 HAO2    |
| ENSACAG000000010234 | 15524 CHRM1   |
| ENSACAG000000016317 | 15525 LUZP2   |
| ENSACAG000000015625 | 15526 DBX1    |
| ENSACAG000000028193 | 15527 NFE2    |
| ENSACAG000000015573 | 15528         |
| ENSACAG000000009362 | 15529         |
| ENSACAG000000001695 | 15530 ELN     |
| ENSACAG000000005016 | 15531 PAQR5   |
| ENSACAG000000011399 | 15532 CFAP161 |
| ENSACAG000000012212 | 15533 PDCL    |
| ENSACAG000000011623 | 15534 LRRC18  |
| ENSACAG000000027749 | 15535 HMX1    |
| ENSACAG000000010056 | 15536 ILDR1   |
| ENSACAG000000011698 | 15537         |
| ENSACAG000000012416 | 15538 SLC17A8 |

|                    |               |
|--------------------|---------------|
| ENSACAG00000009330 | 15539 NR5A1   |
| ENSACAG00000005573 | 15540 BIRC7   |
| ENSACAG00000028586 | 15541         |
| ENSACAG00000028736 | 15542         |
| ENSACAG00000007686 | 15543 ACVR1C  |
| ENSACAG00000018177 | 15544 U12     |
| ENSACAG00000014201 | 15545 EOMES   |
| ENSACAG00000002146 | 15546         |
| ENSACAG00000028599 | 15547         |
| ENSACAG00000029415 | 15548         |
| ENSACAG00000010355 | 15549         |
| ENSACAG00000001146 | 15550 G6PC2   |
| ENSACAG00000028055 | 15551 CNGA2   |
| ENSACAG00000023664 | 15552         |
| ENSACAG00000007370 | 15553         |
| ENSACAG00000022288 | 15554         |
| ENSACAG00000026180 | 15555         |
| ENSACAG00000012486 | 15556         |
| ENSACAG00000024631 | 15557         |
| ENSACAG00000005646 | 15558 IL22RA1 |
| ENSACAG00000025912 | 15559 EXPH5   |
| ENSACAG00000001521 | 15560 REM2    |
| ENSACAG00000017810 | 15561 LGI4    |
| ENSACAG00000011660 | 15562 BEND2   |
| ENSACAG00000024709 | 15563         |
| ENSACAG00000007852 | 15564 TTC34   |
| ENSACAG00000008418 | 15565 FOXI3   |
| ENSACAG00000017169 | 15566 DPEP1   |
| ENSACAG00000003999 | 15567 TSSK4   |
| ENSACAG00000005857 | 15568 FBLN7   |
| ENSACAG00000000478 | 15569 SALL3   |
| ENSACAG00000000213 | 15570         |
| ENSACAG00000022181 | 15571         |
| ENSACAG00000011049 | 15572         |
| ENSACAG00000008372 | 15573 TRPM2   |
| ENSACAG00000017325 | 15574         |
| ENSACAG00000017767 | 15575 AIM1L   |
| ENSACAG00000022247 | 15576         |
| ENSACAG00000028180 | 15577         |
| ENSACAG00000007699 | 15578         |
| ENSACAG00000017704 | 15579         |
| ENSACAG00000013930 | 15580         |

|                    |                |
|--------------------|----------------|
| ENSACAG00000008489 | 15581 ACY3     |
| ENSACAG00000027634 | 15582          |
| ENSACAG00000028624 | 15583          |
| ENSACAG00000006355 | 15584          |
| ENSACAG00000026822 | 15585          |
| ENSACAG00000002751 | 15586          |
| ENSACAG00000007969 | 15587 PIGR     |
| ENSACAG00000010361 | 15588 GBX2     |
| ENSACAG00000015601 | 15589          |
| ENSACAG00000022838 | 15590          |
| ENSACAG00000015745 | 15591 CARD14   |
| ENSACAG00000009365 | 15592          |
| ENSACAG00000026702 | 15593          |
| ENSACAG00000028209 | 15594          |
| ENSACAG00000009161 | 15595 CBLC     |
| ENSACAG00000010858 | 15596 RSPO4    |
| ENSACAG00000004530 | 15597 MAP1LC3C |
| ENSACAG00000002320 | 15598 TRIM67   |
| ENSACAG00000014403 | 15599          |
| ENSACAG00000012951 | 15600          |
| ENSACAG00000027544 | 15601          |
| ENSACAG00000010872 | 15602 WNT8B    |
| ENSACAG00000015138 | 15603          |
| ENSACAG00000014852 | 15604 SPHKAP   |
| ENSACAG00000003906 | 15605 IL22     |
| ENSACAG00000029171 | 15606          |
| ENSACAG00000005997 | 15607          |
| ENSACAG00000006543 | 15608 HOXD1    |
| ENSACAG00000016114 | 15609 IL2RB    |
| ENSACAG00000016461 | 15610 TCF24    |
| ENSACAG00000012994 | 15611 NDNF     |
| ENSACAG00000000404 | 15612          |
| ENSACAG00000029300 | 15613          |
| ENSACAG00000009536 | 15614          |
| ENSACAG00000001946 | 15615          |
| ENSACAG00000028432 | 15616          |
| ENSACAG00000012757 | 15617          |
| ENSACAG00000028882 | 15618 IL15     |
| ENSACAG00000001125 | 15619          |
| ENSACAG00000011899 | 15620          |
| ENSACAG00000006596 | 15621          |
| ENSACAG00000025656 | 15622          |

|                    |                |
|--------------------|----------------|
| ENSACAG00000004670 | 15623 SLC5A12  |
| ENSACAG00000012242 | 15624 PTGS1    |
| ENSACAG00000000910 | 15625          |
| ENSACAG00000006267 | 15626          |
| ENSACAG00000006929 | 15627 UNC5A    |
| ENSACAG00000007272 | 15628 EVX1     |
| ENSACAG00000016900 | 15629          |
| ENSACAG00000000282 | 15630          |
| ENSACAG00000016378 | 15631 FBXO43   |
| ENSACAG00000000285 | 15632          |
| ENSACAG00000027840 | 15633          |
| ENSACAG00000027993 | 15634          |
| ENSACAG00000029077 | 15635          |
| ENSACAG00000009003 | 15636 SH2D4A   |
| ENSACAG00000007700 | 15637 CREG2    |
| ENSACAG00000008077 | 15638 IGFBP3   |
| ENSACAG00000017296 | 15639          |
| ENSACAG00000016983 | 15640 WNT8A    |
| ENSACAG00000016144 | 15641 GPHB5    |
| ENSACAG00000003452 | 15642          |
| ENSACAG00000028272 | 15643          |
| ENSACAG00000011179 | 15644          |
| ENSACAG00000007540 | 15645          |
| ENSACAG00000005345 | 15646          |
| ENSACAG00000022942 | 15647          |
| ENSACAG00000024251 | 15648          |
| ENSACAG00000011803 | 15649 SH3TC1   |
| ENSACAG00000027708 | 15650 NYAP1    |
| ENSACAG00000028135 | 15651          |
| ENSACAG00000013326 | 15652 ADGRF5   |
| ENSACAG00000013492 | 15653 SIGIRR   |
| ENSACAG00000005995 | 15654 WDR88    |
| ENSACAG00000005864 | 15655 PODXL    |
| ENSACAG00000022688 | 15656 HEATR9   |
| ENSACAG00000012731 | 15657 PCSK1    |
| ENSACAG00000011397 | 15658          |
| ENSACAG00000010783 | 15659          |
| ENSACAG00000017441 | 15660 AICDA    |
| ENSACAG00000005583 | 15661 HPGD     |
| ENSACAG00000022700 | 15662          |
| ENSACAG00000016466 | 15663 SYNDIG1L |
| ENSACAG00000025437 | 15664          |

|                    |               |
|--------------------|---------------|
| ENSACAG00000027550 | 15665         |
| ENSACAG00000028413 | 15666         |
| ENSACAG00000008340 | 15667         |
| ENSACAG00000011147 | 15668         |
| ENSACAG00000027099 | 15669 CCDC89  |
| ENSACAG00000017805 | 15670 ZP1     |
| ENSACAG00000026177 | 15671 CD40LG  |
| ENSACAG00000004209 | 15672 PTPN7   |
| ENSACAG00000012166 | 15673         |
| ENSACAG00000029011 | 15674         |
| ENSACAG00000015619 | 15675         |
| ENSACAG00000000508 | 15676 SCNN1B  |
| ENSACAG00000003690 | 15677 ITK     |
| ENSACAG00000009719 | 15678         |
| ENSACAG00000011774 | 15679 RDH8    |
| ENSACAG00000026083 | 15680 PRR29   |
| ENSACAG00000028410 | 15681         |
| ENSACAG00000029207 | 15682         |
| ENSACAG00000008549 | 15683 TBX10   |
| ENSACAG00000029574 | 15684 SFTPC   |
| ENSACAG00000010602 | 15685         |
| ENSACAG00000025947 | 15686         |
| ENSACAG00000009032 | 15687         |
| ENSACAG00000013923 | 15688 SLC41A3 |
| ENSACAG00000022772 | 15689         |
| ENSACAG00000017012 | 15690         |
| ENSACAG00000022752 | 15691         |
| ENSACAG00000012104 | 15692 BIN2    |
| ENSACAG00000003305 | 15693 PDX1    |
| ENSACAG00000005940 | 15694 LAG3    |
| ENSACAG00000005469 | 15695         |
| ENSACAG00000001984 | 15696         |
| ENSACAG00000004674 | 15697 BRDT    |
| ENSACAG00000006949 | 15698 TMEM114 |
| ENSACAG00000013598 | 15699         |
| ENSACAG00000005055 | 15700         |
| ENSACAG00000010062 | 15701         |
| ENSACAG00000003746 | 15702         |
| ENSACAG00000028433 | 15703         |
| ENSACAG00000006622 | 15704 CNGA1   |
| ENSACAG00000017029 | 15705 GYS2    |
| ENSACAG00000006077 | 15706         |

|                    |                |
|--------------------|----------------|
| ENSACAG00000022087 | 15707          |
| ENSACAG00000010156 | 15708 SPIRE1   |
| ENSACAG00000025507 | 15709          |
| ENSACAG00000024734 | 15710          |
| ENSACAG00000001468 | 15711          |
| ENSACAG00000029268 | 15712 TMEM217  |
| ENSACAG00000000768 | 15713 SYK      |
| ENSACAG00000013245 | 15714 HNF4G    |
| ENSACAG00000002519 | 15715          |
| ENSACAG00000014510 | 15716 TNFSF13B |
| ENSACAG00000011748 | 15717 FBXL16   |
| ENSACAG00000013696 | 15718 POU1F1   |
| ENSACAG00000028645 | 15719          |
| ENSACAG00000023780 | 15720          |
| ENSACAG00000023904 | 15721          |
| ENSACAG00000011522 | 15722 WEE2     |
| ENSACAG00000027629 | 15723          |
| ENSACAG00000025361 | 15724          |
| ENSACAG00000015083 | 15725 PLA2G4F  |
| ENSACAG00000011230 | 15726 FAM46D   |
| ENSACAG00000005185 | 15727          |
| ENSACAG00000015748 | 15728 SFRP2    |
| ENSACAG00000029010 | 15729          |
| ENSACAG00000017411 | 15730 CCDC155  |
| ENSACAG00000026438 | 15731          |
| ENSACAG00000001432 | 15732 SCGN     |
| ENSACAG00000000878 | 15733          |
| ENSACAG00000002393 | 15734 EDARADD  |
| ENSACAG00000016557 | 15735 PGLYRP2  |
| ENSACAG00000010990 | 15736          |
| ENSACAG00000005789 | 15737          |
| ENSACAG00000016745 | 15738 KDF1     |
| ENSACAG00000005062 | 15739 RBBP8NL  |
| ENSACAG00000014553 | 15740          |
| ENSACAG00000025984 | 15741          |
| ENSACAG00000028759 | 15742 FMO1     |
| ENSACAG00000023658 | 15743          |
| ENSACAG00000026748 | 15744          |
| ENSACAG00000000486 | 15745 PCSK4    |
| ENSACAG00000024720 | 15746          |
| ENSACAG00000023181 | 15747          |
| ENSACAG00000028705 | 15748 GSG1L2   |

|                    |                |
|--------------------|----------------|
| ENSACAG00000017668 | 15749 SFRP4    |
| ENSACAG00000005697 | 15750 NKX2-2   |
| ENSACAG00000004842 | 15751          |
| ENSACAG00000029649 | 15752          |
| ENSACAG00000017351 | 15753          |
| ENSACAG00000009163 | 15754 CLDN18   |
| ENSACAG00000007958 | 15755          |
| ENSACAG00000013117 | 15756          |
| ENSACAG00000010943 | 15757          |
| ENSACAG00000007520 | 15758 TM4SF4   |
| ENSACAG00000002094 | 15759 KCNK16   |
| ENSACAG00000008419 | 15760 LACTBL1  |
| ENSACAG00000025247 | 15761          |
| ENSACAG00000029547 | 15762          |
| ENSACAG00000026958 | 15763 CACNG8   |
| ENSACAG00000026651 | 15764          |
| ENSACAG00000017860 | 15765          |
| ENSACAG00000028839 | 15766          |
| ENSACAG00000000791 | 15767 DUSP26   |
| ENSACAG00000017784 | 15768 SLC15A3  |
| ENSACAG00000004919 | 15769 CALHM3   |
| ENSACAG00000022837 | 15770          |
| ENSACAG00000006858 | 15771          |
| ENSACAG00000000904 | 15772 GMNC     |
| ENSACAG00000004062 | 15773 CLEC3B   |
| ENSACAG00000029344 | 15774          |
| ENSACAG00000017975 | 15775 SEZ6     |
| ENSACAG00000023769 | 15776          |
| ENSACAG00000024164 | 15777 C4orf48  |
| ENSACAG00000006994 | 15778 PTPN6    |
| ENSACAG00000012180 | 15779 C9orf152 |
| ENSACAG00000015277 | 15780 ABCG8    |
| ENSACAG00000000579 | 15781 RNF43    |
| ENSACAG00000029087 | 15782          |
| ENSACAG00000005948 | 15783 OLFML1   |
| ENSACAG00000028873 | 15784 NME4     |
| ENSACAG00000022851 | 15785 MYF6     |
| ENSACAG00000001002 | 15786 B3GNT7   |
| ENSACAG00000029493 | 15787 TSPAN1   |
| ENSACAG00000016202 | 15788 EDNRB    |
| ENSACAG00000026578 | 15789          |
| ENSACAG00000000413 | 15790          |



|                    |                |
|--------------------|----------------|
| ENSACAG00000013257 | 15791          |
| ENSACAG00000029633 | 15792 TAC1     |
| ENSACAG00000006423 | 15793 HOXB8    |
| ENSACAG00000006380 | 15794          |
| ENSACAG00000002389 | 15795 HELT     |
| ENSACAG00000017772 | 15796          |
| ENSACAG00000008476 | 15797 NMBR     |
| ENSACAG00000006233 | 15798 PPIL6    |
| ENSACAG00000006119 | 15799          |
| ENSACAG00000017491 | 15800 FN3K     |
| ENSACAG00000012997 | 15801 SPATA9   |
| ENSACAG00000017681 | 15802 MFSD6L   |
| ENSACAG00000022991 | 15803          |
| ENSACAG00000010289 | 15804          |
| ENSACAG00000005499 | 15805 SLC39A12 |
| ENSACAG00000028934 | 15806          |
| ENSACAG00000000601 | 15807 F8       |
| ENSACAG00000008800 | 15808          |
| ENSACAG00000029329 | 15809          |
| ENSACAG00000022953 | 15810 ZNF469   |
| ENSACAG00000015855 | 15811          |
| ENSACAG00000023206 | 15812          |
| ENSACAG00000006305 | 15813 OPRL1    |
| ENSACAG00000025561 | 15814          |
| ENSACAG00000028883 | 15815          |
| ENSACAG00000022401 | 15816 EC11     |
| ENSACAG00000011442 | 15817          |
| ENSACAG00000025244 | 15818          |
| ENSACAG00000005493 | 15819          |
| ENSACAG00000008560 | 15820 ZMYND15  |
| ENSACAG00000007002 | 15821 PPP1R3A  |
| ENSACAG00000000291 | 15822 SLC26A10 |
| ENSACAG00000006241 | 15823          |
| ENSACAG00000001406 | 15824 SBK1     |
| ENSACAG00000016124 | 15825 CCR7     |
| ENSACAG00000028916 | 15826          |
| ENSACAG00000027234 | 15827          |
| ENSACAG00000005550 | 15828 SP9      |
| ENSACAG00000028027 | 15829          |
| ENSACAG00000006648 | 15830          |
| ENSACAG00000029576 | 15831          |
| ENSACAG00000004498 | 15832 GF11     |

|                    |                  |
|--------------------|------------------|
| ENSACAG00000028818 | 15833            |
| ENSACAG00000005980 | 15834 TAL1       |
| ENSACAG00000007703 | 15835 DPYSL4     |
| ENSACAG00000027406 | 15836            |
| ENSACAG00000004801 | 15837 HTR1B      |
| ENSACAG00000015821 | 15838 CA11       |
| ENSACAG00000016809 | 15839 SPIC       |
| ENSACAG00000024824 | 15840            |
| ENSACAG00000002714 | 15841            |
| ENSACAG00000014383 | 15842 SLC34A2    |
| ENSACAG00000011369 | 15843 CLIP3      |
| ENSACAG00000017236 | 15844            |
| ENSACAG00000010515 | 15845 TRAF1      |
| ENSACAG00000022201 | 15846            |
| ENSACAG00000027051 | 15847            |
| ENSACAG00000002484 | 15848 ST6GAL1    |
| ENSACAG00000015639 | 15849 LHX3       |
| ENSACAG00000005188 | 15850            |
| ENSACAG00000006484 | 15851 HOXB5      |
| ENSACAG00000027562 | 15852            |
| ENSACAG00000015803 | 15853            |
| ENSACAG00000029187 | 15854            |
| ENSACAG00000001679 | 15855 WFIKKN2    |
| ENSACAG00000026755 | 15856            |
| ENSACAG00000023476 | 15857            |
| ENSACAG00000002432 | 15858            |
| ENSACAG00000008525 | 15859 SLC16A8    |
| ENSACAG00000007934 | 15860            |
| ENSACAG00000000122 | 15861            |
| ENSACAG00000003639 | 15862 CHRM3      |
| ENSACAG00000009025 | 15863 CSGALNACT1 |
| ENSACAG00000005639 | 15864            |
| ENSACAG00000026558 | 15865            |
| ENSACAG00000013217 | 15866            |
| ENSACAG00000029317 | 15867            |
| ENSACAG00000028667 | 15868            |
| ENSACAG00000003934 | 15869 KCNG1      |
| ENSACAG00000017562 | 15870 TMEM52B    |
| ENSACAG00000024436 | 15871            |
| ENSACAG00000010388 | 15872            |
| ENSACAG00000013562 | 15873 PMP2       |
| ENSACAG00000017555 | 15874 RNF222     |

|                    |                 |
|--------------------|-----------------|
| ENSACAG00000029023 | 15875           |
| ENSACAG00000011152 | 15876 NTS       |
| ENSACAG00000016370 | 15877           |
| ENSACAG00000016089 | 15878 TFAP2C    |
| ENSACAG00000010150 | 15879 CABP2     |
| ENSACAG00000002745 | 15880 RNF207    |
| ENSACAG00000010836 | 15881 TDRD15    |
| ENSACAG00000002975 | 15882 MBOAT4    |
| ENSACAG00000015317 | 15883           |
| ENSACAG00000012748 | 15884 SALL4     |
| ENSACAG00000015673 | 15885 FGA       |
| ENSACAG00000024243 | 15886           |
| ENSACAG00000013020 | 15887           |
| ENSACAG00000003383 | 15888           |
| ENSACAG00000008445 | 15889 TNFRSF11B |
| ENSACAG00000029163 | 15890           |
| ENSACAG00000003425 | 15891 GGT5      |
| ENSACAG00000016896 | 15892 FIBCD1    |
| ENSACAG00000008741 | 15893 HTR6      |
| ENSACAG00000028342 | 15894           |
| ENSACAG00000015358 | 15895           |
| ENSACAG00000011139 | 15896           |
| ENSACAG00000017966 | 15897 OPRK1     |
| ENSACAG00000014819 | 15898           |
| ENSACAG00000021076 | 15899           |
| ENSACAG00000006660 | 15900 HHEX      |
| ENSACAG00000029681 | 15901           |
| ENSACAG00000005793 | 15902 FADS6     |
| ENSACAG00000007005 | 15903 GPR85     |
| ENSACAG00000024538 | 15904 CRNN      |
| ENSACAG00000025210 | 15905           |
| ENSACAG00000029538 | 15906           |
| ENSACAG00000024515 | 15907           |
| ENSACAG00000017070 | 15908           |
| ENSACAG00000026518 | 15909 WDR87     |
| ENSACAG00000000662 | 15910 HSF5      |
| ENSACAG00000015486 | 15911 TRIM42    |
| ENSACAG00000002027 | 15912           |
| ENSACAG00000029335 | 15913           |
| ENSACAG00000026959 | 15914           |
| ENSACAG00000009717 | 15915           |
| ENSACAG00000012511 | 15916 ODF3L2    |

|                    |                |
|--------------------|----------------|
| ENSACAG00000000598 | 15917          |
| ENSACAG00000009713 | 15918 ZNF366   |
| ENSACAG00000024691 | 15919 FSIP2    |
| ENSACAG00000001619 | 15920 CCDC185  |
| ENSACAG00000017840 | 15921 SYTL1    |
| ENSACAG00000001873 | 15922          |
| ENSACAG00000000241 | 15923 GOT1L1   |
| ENSACAG00000029230 | 15924          |
| ENSACAG00000025527 | 15925          |
| ENSACAG00000014220 | 15926 TMEM200A |
| ENSACAG00000017657 | 15927          |
| ENSACAG00000003636 | 15928          |
| ENSACAG00000029180 | 15929 TMEM252  |
| ENSACAG00000026291 | 15930          |
| ENSACAG00000009737 | 15931 KLHL38   |
| ENSACAG00000010138 | 15932 LRIT3    |
| ENSACAG00000009466 | 15933 SLITRK4  |
| ENSACAG00000016912 | 15934 ASIC5    |
| ENSACAG00000001528 | 15935 NKX2-4   |
| ENSACAG00000014200 | 15936          |
| ENSACAG00000029261 | 15937 PPP1R17  |
| ENSACAG00000007044 | 15938 TBX21    |
| ENSACAG00000025081 | 15939          |
| ENSACAG00000015369 | 15940          |
| ENSACAG00000028536 | 15941          |
| ENSACAG00000023617 | 15942          |
| ENSACAG00000028352 | 15943          |
| ENSACAG00000017518 | 15944          |
| ENSACAG00000028774 | 15945          |
| ENSACAG00000013603 | 15946          |
| ENSACAG00000012401 | 15947 KCNJ3    |
| ENSACAG00000028984 | 15948          |
| ENSACAG00000005409 | 15949 IRF8     |
| ENSACAG00000029438 | 15950          |
| ENSACAG00000007667 | 15951          |
| ENSACAG00000007194 | 15952 B4GALNT1 |
| ENSACAG00000012336 | 15953 NPHS2    |
| ENSACAG00000022209 | 15954 CCDC102B |
| ENSACAG00000012284 | 15955 MATN4    |
| ENSACAG00000001895 | 15956 NEIL2    |
| ENSACAG00000011823 | 15957          |
| ENSACAG00000012150 | 15958 SERPINE3 |

|                    |               |
|--------------------|---------------|
| ENSACAG00000028371 | 15959 NPFF    |
| ENSACAG00000027678 | 15960         |
| ENSACAG00000001767 | 15961         |
| ENSACAG00000002464 | 15962 MANSC4  |
| ENSACAG00000023752 | 15963         |
| ENSACAG00000028461 | 15964         |
| ENSACAG00000029515 | 15965         |
| ENSACAG00000017879 | 15966         |
| ENSACAG00000023741 | 15967 CHGB    |
| ENSACAG00000007282 | 15968 HOXD11  |
| ENSACAG00000005026 | 15969         |
| ENSACAG00000010772 | 15970         |
| ENSACAG00000022298 | 15971         |
| ENSACAG00000015213 | 15972 RAB38   |
| ENSACAG00000027863 | 15973         |
| ENSACAG00000016341 | 15974         |
| ENSACAG00000009229 | 15975 ADGRG4  |
| ENSACAG00000009977 | 15976 LRFN5   |
| ENSACAG00000016782 | 15977 R3HDML  |
| ENSACAG00000005050 | 15978         |
| ENSACAG00000011696 | 15979         |
| ENSACAG00000023632 | 15980 NRN1L   |
| ENSACAG00000009559 | 15981 TMEM174 |
| ENSACAG00000014986 | 15982         |
| ENSACAG00000022728 | 15983 CENPBD1 |
| ENSACAG00000017910 | 15984 HOXD10  |
| ENSACAG00000011570 | 15985         |
| ENSACAG00000016586 | 15986         |
| ENSACAG00000004968 | 15987         |
| ENSACAG00000009767 | 15988         |
| ENSACAG00000013114 | 15989 NPR1    |
| ENSACAG00000024342 | 15990         |
| ENSACAG00000013081 | 15991 MAP3K10 |
| ENSACAG00000010314 | 15992         |
| ENSACAG00000009753 | 15993 TH      |
| ENSACAG00000006878 | 15994 CYP26C1 |
| ENSACAG00000009676 | 15995         |
| ENSACAG00000004683 | 15996 COL9A2  |
| ENSACAG00000029352 | 15997         |
| ENSACAG00000028247 | 15998         |
| ENSACAG00000022928 | 15999         |
| ENSACAG00000009381 | 16000 SCN10A  |

|                    |                |
|--------------------|----------------|
| ENSACAG00000026488 | 16001          |
| ENSACAG00000011006 | 16002          |
| ENSACAG00000029311 | 16003          |
| ENSACAG00000025080 | 16004          |
| ENSACAG00000017927 | 16005 NYX      |
| ENSACAG00000014565 | 16006 MAL      |
| ENSACAG00000029007 | 16007          |
| ENSACAG00000028351 | 16008          |
| ENSACAG00000010462 | 16009 CCR6     |
| ENSACAG00000021048 | 16010 GPR173   |
| ENSACAG00000029498 | 16011          |
| ENSACAG00000013855 | 16012 CCR10    |
| ENSACAG00000017956 | 16013 HCRT     |
| ENSACAG00000011789 | 16014 CHRNA9   |
| ENSACAG00000029671 | 16015          |
| ENSACAG00000014189 | 16016 GAL      |
| ENSACAG00000007933 | 16017          |
| ENSACAG00000001943 | 16018          |
| ENSACAG00000000139 | 16019 CATSPER2 |
| ENSACAG00000024396 | 16020          |
| ENSACAG00000008903 | 16021 DMRTB1   |
| ENSACAG00000023631 | 16022          |
| ENSACAG00000007641 | 16023 XKR6     |
| ENSACAG00000002416 | 16024          |
| ENSACAG00000001760 | 16025          |
| ENSACAG00000011736 | 16026 RS1      |
| ENSACAG00000028875 | 16027          |
| ENSACAG00000004814 | 16028 KLHL6    |
| ENSACAG00000026769 | 16029          |
| ENSACAG00000028745 | 16030 TNFRSF18 |
| ENSACAG00000010617 | 16031          |
| ENSACAG00000022270 | 16032          |
| ENSACAG00000023142 | 16033          |
| ENSACAG00000029685 | 16034          |
| ENSACAG00000024988 | 16035          |
| ENSACAG00000022090 | 16036 FOXH1    |
| ENSACAG00000015392 | 16037          |
| ENSACAG00000002923 | 16038 IGSF11   |
| ENSACAG00000004878 | 16039 NXP3     |
| ENSACAG00000007196 | 16040          |
| ENSACAG00000015610 | 16041 LRAT     |
| ENSACAG00000025786 | 16042          |

|                    |                |
|--------------------|----------------|
| ENSACAG00000014636 | 16043          |
| ENSACAG00000006474 | 16044 HOXB6    |
| ENSACAG00000003547 | 16045          |
| ENSACAG00000001647 | 16046          |
| ENSACAG00000028680 | 16047 WDR93    |
| ENSACAG00000027063 | 16048 HYAL4    |
| ENSACAG00000007382 | 16049 IL18RAP  |
| ENSACAG00000013649 | 16050          |
| ENSACAG00000003662 | 16051          |
| ENSACAG00000011921 | 16052          |
| ENSACAG00000023309 | 16053 ENAM     |
| ENSACAG00000028525 | 16054          |
| ENSACAG00000006818 | 16055          |
| ENSACAG00000009990 | 16056          |
| ENSACAG00000017656 | 16057          |
| ENSACAG00000016374 | 16058 PAH      |
| ENSACAG00000011308 | 16059 TCTEX1D1 |
| ENSACAG00000012770 | 16060          |
| ENSACAG00000008025 | 16061          |
| ENSACAG00000004979 | 16062          |
| ENSACAG00000010403 | 16063          |
| ENSACAG00000025462 | 16064          |
| ENSACAG00000012443 | 16065 MMP13    |
| ENSACAG00000028546 | 16066 KRT78    |
| ENSACAG00000015403 | 16067 LRIT2    |
| ENSACAG00000014306 | 16068          |
| ENSACAG00000022261 | 16069          |
| ENSACAG00000010244 | 16070          |
| ENSACAG00000028042 | 16071 NCF1     |
| ENSACAG00000014705 | 16072 DLX6     |
| ENSACAG00000029000 | 16073          |
| ENSACAG00000008063 | 16074 IGFBP1   |
| ENSACAG00000001631 | 16075          |
| ENSACAG00000012405 | 16076          |
| ENSACAG00000023062 | 16077          |
| ENSACAG00000028514 | 16078          |
| ENSACAG00000029610 | 16079          |
| ENSACAG00000002338 | 16080 FEZF2    |
| ENSACAG00000004682 | 16081          |
| ENSACAG00000005863 | 16082 OTOP2    |
| ENSACAG00000014532 | 16083          |
| ENSACAG00000026396 | 16084          |

|                    |               |
|--------------------|---------------|
| ENSACAG00000011777 | 16085 HIC1    |
| ENSACAG00000002618 | 16086 CCDC79  |
| ENSACAG00000026423 | 16087         |
| ENSACAG00000017528 | 16088         |
| ENSACAG00000007042 | 16089 ZDHHC19 |
| ENSACAG00000022906 | 16090         |
| ENSACAG00000029439 | 16091 FOXI2   |
| ENSACAG00000028772 | 16092         |
| ENSACAG00000027231 | 16093         |
| ENSACAG00000015447 | 16094 GALR3   |
| ENSACAG00000013353 | 16095 FABP2   |
| ENSACAG00000013320 | 16096 FMO4    |
| ENSACAG00000013780 | 16097         |
| ENSACAG00000005533 | 16098         |
| ENSACAG00000008367 | 16099 KLF1    |
| ENSACAG00000028723 | 16100         |
| ENSACAG00000027089 | 16101         |
| ENSACAG00000029004 | 16102         |
| ENSACAG00000013751 | 16103 PROP1   |
| ENSACAG00000026421 | 16104 NKG7    |
| ENSACAG00000011288 | 16105 RBP3    |
| ENSACAG00000029029 | 16106         |
| ENSACAG00000028863 | 16107         |
| ENSACAG00000028383 | 16108         |
| ENSACAG00000011183 | 16109 MGAT4C  |
| ENSACAG00000004852 | 16110         |
| ENSACAG00000013902 | 16111         |
| ENSACAG00000028267 | 16112 C8orf46 |
| ENSACAG00000016880 | 16113 TDO2    |
| ENSACAG00000016460 | 16114         |
| ENSACAG00000029407 | 16115         |
| ENSACAG00000004637 | 16116 BEST3   |
| ENSACAG00000023425 | 16117         |
| ENSACAG00000011386 | 16118 TPPP2   |
| ENSACAG00000028292 | 16119         |
| ENSACAG00000000157 | 16120         |
| ENSACAG00000010522 | 16121         |
| ENSACAG00000000446 | 16122 NEU4    |
| ENSACAG00000026027 | 16123         |
| ENSACAG00000006890 | 16124         |
| ENSACAG00000013138 | 16125 PI15    |
| ENSACAG00000029051 | 16126         |



|                    |              |
|--------------------|--------------|
| ENSACAG00000012814 | 16127 TRPM4  |
| ENSACAG00000028454 | 16128 OVOL1  |
| ENSACAG00000025987 | 16129        |
| ENSACAG00000005861 | 16130 PLPPR3 |
| ENSACAG00000007897 | 16131        |
| ENSACAG00000014172 | 16132 CDCP2  |
| ENSACAG00000003774 | 16133 ASTL   |
| ENSACAG00000006634 | 16134 CAMP   |
| ENSACAG00000017083 | 16135 KISS1R |
| ENSACAG00000026393 | 16136        |
| ENSACAG00000011280 | 16137        |
| ENSACAG00000011779 | 16138        |
| ENSACAG00000016278 | 16139        |
| ENSACAG00000013022 | 16140 TMEM79 |
| ENSACAG00000029663 | 16141        |
| ENSACAG00000028423 | 16142        |
| ENSACAG00000029378 | 16143        |
| ENSACAG00000000606 | 16144 SP7    |
| ENSACAG00000027130 | 16145 CD22   |
| ENSACAG00000026264 | 16146        |
| ENSACAG00000024104 | 16147        |
| ENSACAG00000017724 | 16148        |
| ENSACAG00000009220 | 16149        |
| ENSACAG00000029414 | 16150        |
| ENSACAG00000001370 | 16151        |
| ENSACAG00000025607 | 16152        |
| ENSACAG00000000655 | 16153        |
| ENSACAG00000029422 | 16154        |
| ENSACAG00000029320 | 16155        |
| ENSACAG00000015073 | 16156 CD79A  |
| ENSACAG00000002558 | 16157 KCNV1  |
| ENSACAG00000029477 | 16158        |
| ENSACAG00000013587 | 16159        |
| ENSACAG00000017132 | 16160 KCNJ8  |
| ENSACAG00000028987 | 16161        |
| ENSACAG00000010956 | 16162        |
| ENSACAG00000029668 | 16163        |
| ENSACAG00000025202 | 16164        |
| ENSACAG00000002822 | 16165        |
| ENSACAG00000009306 | 16166        |
| ENSACAG00000026350 | 16167        |
| ENSACAG00000023558 | 16168        |

|                    |               |
|--------------------|---------------|
| ENSACAG00000029458 | 16169         |
| ENSACAG00000024658 | 16170         |
| ENSACAG00000028709 | 16171         |
| ENSACAG00000026617 | 16172         |
| ENSACAG00000029471 | 16173         |
| ENSACAG00000026088 | 16174         |
| ENSACAG00000006529 | 16175 HOXB1   |
| ENSACAG00000010692 | 16176 APOB    |
| ENSACAG00000004208 | 16177 MSTN    |
| ENSACAG00000025965 | 16178         |
| ENSACAG00000013913 | 16179 SLC7A13 |
| ENSACAG00000022759 | 16180         |
| ENSACAG00000022224 | 16181         |
| ENSACAG00000002533 | 16182         |
| ENSACAG00000017126 | 16183 SCAMP5  |
| ENSACAG00000012680 | 16184 TEX28   |
| ENSACAG00000023836 | 16185         |
| ENSACAG00000028837 | 16186         |
| ENSACAG00000000875 | 16187 RAB1A   |
| ENSACAG00000001023 | 16188         |
| ENSACAG00000012463 | 16189         |
| ENSACAG00000002255 | 16190 LAMP5   |
| ENSACAG00000001691 | 16191 NEK11   |
| ENSACAG00000006562 | 16192 FAM132B |
| ENSACAG00000026304 | 16193         |
| ENSACAG00000029006 | 16194         |
| ENSACAG00000004554 | 16195 RAB17   |
| ENSACAG00000029356 | 16196         |
| ENSACAG00000001033 | 16197 TBX4    |
| ENSACAG00000000481 | 16198 HEPACAM |
| ENSACAG00000001649 | 16199 MLNR    |
| ENSACAG00000026845 | 16200 ZNF862  |
| ENSACAG00000001414 | 16201         |
| ENSACAG00000024859 | 16202         |
| ENSACAG00000028946 | 16203         |
| ENSACAG00000005630 | 16204 CHRN3   |
| ENSACAG00000005856 | 16205         |
| ENSACAG00000022763 | 16206         |
| ENSACAG00000028323 | 16207         |
| ENSACAG00000026621 | 16208         |
| ENSACAG00000029363 | 16209 RIPPLY2 |
| ENSACAG00000028943 | 16210 C3orf52 |

|                    |                |
|--------------------|----------------|
| ENSACAG00000004398 | 16211 CCK      |
| ENSACAG00000015750 | 16212 LRRIQ4   |
| ENSACAG00000000053 | 16213          |
| ENSACAG00000004924 | 16214 F3       |
| ENSACAG00000003271 | 16215          |
| ENSACAG00000010303 | 16216 C7       |
| ENSACAG00000028628 | 16217          |
| ENSACAG00000022007 | 16218          |
| ENSACAG00000004353 | 16219          |
| ENSACAG00000013760 | 16220          |
| ENSACAG00000024622 | 16221          |
| ENSACAG00000016261 | 16222 ODF3L1   |
| ENSACAG00000028803 | 16223          |
| ENSACAG00000002917 | 16224          |
| ENSACAG00000014372 | 16225 SNX20    |
| ENSACAG00000028780 | 16226          |
| ENSACAG00000025158 | 16227          |
| ENSACAG00000004091 | 16228          |
| ENSACAG00000012107 | 16229 SLC13A2  |
| ENSACAG00000028500 | 16230          |
| ENSACAG00000028035 | 16231          |
| ENSACAG00000028620 | 16232          |
| ENSACAG00000013798 | 16233 GABRA3   |
| ENSACAG00000013670 | 16234 BNC1     |
| ENSACAG00000001501 | 16235          |
| ENSACAG00000004936 | 16236          |
| ENSACAG00000015483 | 16237 ESM1     |
| ENSACAG00000025180 | 16238          |
| ENSACAG00000002731 | 16239 KIAA2022 |
| ENSACAG00000023647 | 16240          |
| ENSACAG00000000396 | 16241          |
| ENSACAG00000008429 | 16242 CLUL1    |
| ENSACAG00000010674 | 16243          |
| ENSACAG00000011790 | 16244          |
| ENSACAG00000029577 | 16245 TNFRSF4  |
| ENSACAG00000015572 | 16246 SLC45A1  |
| ENSACAG00000003375 | 16247          |
| ENSACAG00000029176 | 16248          |
| ENSACAG00000009367 | 16249          |
| ENSACAG00000006716 | 16250          |
| ENSACAG00000002596 | 16251 GSC2     |
| ENSACAG00000006695 | 16252          |

|                    |                |
|--------------------|----------------|
| ENSACAG00000028648 | 16253          |
| ENSACAG00000015061 | 16254 BTBD17   |
| ENSACAG00000010930 | 16255          |
| ENSACAG00000007626 | 16256          |
| ENSACAG00000003014 | 16257 ASB12    |
| ENSACAG00000027606 | 16258          |
| ENSACAG00000012758 | 16259          |
| ENSACAG00000007060 | 16260          |
| ENSACAG00000001507 | 16261          |
| ENSACAG00000023819 | 16262          |
| ENSACAG00000028796 | 16263          |
| ENSACAG00000013304 | 16264          |
| ENSACAG00000024009 | 16265          |
| ENSACAG00000029244 | 16266          |
| ENSACAG00000005037 | 16267 LHX5     |
| ENSACAG00000006272 | 16268 F12      |
| ENSACAG00000027223 | 16269          |
| ENSACAG00000011740 | 16270          |
| ENSACAG00000008906 | 16271 IL7R     |
| ENSACAG00000022765 | 16272          |
| ENSACAG00000027834 | 16273          |
| ENSACAG00000010431 | 16274          |
| ENSACAG00000029674 | 16275 ICOS     |
| ENSACAG00000028795 | 16276          |
| ENSACAG00000007830 | 16277 FETUB    |
| ENSACAG00000009650 | 16278          |
| ENSACAG00000029248 | 16279          |
| ENSACAG00000011131 | 16280 SLC52A3  |
| ENSACAG00000028938 | 16281          |
| ENSACAG00000005831 | 16282 USH1G    |
| ENSACAG00000013990 | 16283          |
| ENSACAG00000003788 | 16284 SIX3     |
| ENSACAG00000006773 | 16285          |
| ENSACAG00000006755 | 16286 HK3      |
| ENSACAG00000000086 | 16287          |
| ENSACAG00000016291 | 16288 NRROS    |
| ENSACAG00000029145 | 16289          |
| ENSACAG00000017260 | 16290 DNALI1   |
| ENSACAG00000017838 | 16291          |
| ENSACAG00000022808 | 16292          |
| ENSACAG00000012123 | 16293          |
| ENSACAG00000028458 | 16294 PLA2G12B |

|                    |               |
|--------------------|---------------|
| ENSACAG00000024968 | 16295         |
| ENSACAG00000008652 | 16296         |
| ENSACAG00000007753 | 16297 SLC30A3 |
| ENSACAG00000002373 | 16298 MLC1    |
| ENSACAG00000028653 | 16299         |
| ENSACAG00000010270 | 16300 MYADML2 |
| ENSACAG00000011057 | 16301         |
| ENSACAG00000007052 | 16302         |
| ENSACAG00000015674 | 16303 FGB     |
| ENSACAG00000014804 | 16304         |
| ENSACAG00000027289 | 16305         |
| ENSACAG00000006405 | 16306         |
| ENSACAG00000025309 | 16307         |
| ENSACAG00000012537 | 16308         |
| ENSACAG00000028518 | 16309         |
| ENSACAG00000006729 | 16310 MPEG1   |
| ENSACAG00000008546 | 16311         |
| ENSACAG00000012365 | 16312 KLHL35  |
| ENSACAG00000015471 | 16313         |
| ENSACAG00000007026 | 16314         |
| ENSACAG00000029164 | 16315         |
| ENSACAG00000009643 | 16316         |
| ENSACAG00000029367 | 16317 RTL1    |
| ENSACAG00000009658 | 16318         |
| ENSACAG00000013710 | 16319 VSX1    |
| ENSACAG00000003761 | 16320         |
| ENSACAG00000022706 | 16321         |
| ENSACAG00000001499 | 16322 FABP7   |
| ENSACAG00000010497 | 16323 GSX2    |
| ENSACAG00000029255 | 16324         |
| ENSACAG00000008049 | 16325         |
| ENSACAG00000010691 | 16326 LINGO2  |
| ENSACAG00000009498 | 16327 CD247   |
| ENSACAG00000023926 | 16328         |
| ENSACAG00000029090 | 16329         |
| ENSACAG00000025099 | 16330         |
| ENSACAG00000014130 | 16331 PRRG3   |
| ENSACAG00000007697 | 16332 REN     |
| ENSACAG00000027584 | 16333         |
| ENSACAG00000005531 | 16334         |
| ENSACAG00000028091 | 16335         |
| ENSACAG00000025308 | 16336         |

|                    |               |
|--------------------|---------------|
| ENSACAG00000028748 | 16337         |
| ENSACAG00000026653 | 16338         |
| ENSACAG00000001010 | 16339         |
| ENSACAG00000008395 | 16340         |
| ENSACAG00000023480 | 16341         |
| ENSACAG00000017866 | 16342 KRT12   |
| ENSACAG00000013461 | 16343         |
| ENSACAG00000027786 | 16344         |
| ENSACAG00000023993 | 16345         |
| ENSACAG00000016725 | 16346 OCSTAMP |
| ENSACAG00000027017 | 16347         |
| ENSACAG00000024960 | 16348         |
| ENSACAG00000029034 | 16349         |
| ENSACAG00000026932 | 16350         |
| ENSACAG00000007893 | 16351         |
| ENSACAG00000009819 | 16352         |
| ENSACAG00000011322 | 16353 TYRP1   |
| ENSACAG00000022902 | 16354         |
| ENSACAG00000001286 | 16355 GPR37   |
| ENSACAG00000022930 | 16356         |
| ENSACAG00000010042 | 16357         |
| ENSACAG00000015484 | 16358         |
| ENSACAG00000016136 | 16359 KCNJ9   |
| ENSACAG00000013141 | 16360 KCNA3   |
| ENSACAG00000017486 | 16361         |
| ENSACAG00000029524 | 16362         |
| ENSACAG00000001202 | 16363         |
| ENSACAG00000029012 | 16364         |
| ENSACAG00000027430 | 16365         |
| ENSACAG00000010549 | 16366         |
| ENSACAG00000014562 | 16367 RERGL   |
| ENSACAG00000028804 | 16368         |
| ENSACAG00000010818 | 16369 TMEM102 |
| ENSACAG00000005989 | 16370         |
| ENSACAG00000029173 | 16371         |
| ENSACAG00000025283 | 16372 PRDM16  |
| ENSACAG00000021973 | 16373         |
| ENSACAG00000025714 | 16374         |
| ENSACAG00000028282 | 16375         |
| ENSACAG00000022275 | 16376         |
| ENSACAG00000003394 | 16377         |
| ENSACAG00000025348 | 16378         |

|                    |                |
|--------------------|----------------|
| ENSACAG00000028704 | 16379          |
| ENSACAG00000027413 | 16380          |
| ENSACAG00000008021 | 16381          |
| ENSACAG00000003249 | 16382 C21orf62 |
| ENSACAG00000016168 | 16383 DLX2     |
| ENSACAG00000008544 | 16384 OTX2     |
| ENSACAG00000026078 | 16385          |
| ENSACAG00000023817 | 16386 HIPK4    |
| ENSACAG00000026942 | 16387          |
| ENSACAG00000017915 | 16388 HOXD13   |
| ENSACAG00000029388 | 16389          |
| ENSACAG00000029067 | 16390          |
| ENSACAG00000028905 | 16391          |
| ENSACAG00000029678 | 16392          |
| ENSACAG00000028269 | 16393          |
| ENSACAG00000009620 | 16394          |
| ENSACAG00000025708 | 16395          |
| ENSACAG00000014891 | 16396          |
| ENSACAG00000005619 | 16397 VIP      |
| ENSACAG00000023635 | 16398 MCHR1    |
| ENSACAG00000013817 | 16399 FAM26F   |
| ENSACAG00000028277 | 16400          |
| ENSACAG00000028684 | 16401          |
| ENSACAG00000029497 | 16402          |
| ENSACAG00000013136 | 16403 CILP2    |
| ENSACAG00000023291 | 16404          |
| ENSACAG00000016110 | 16405 IGSF8    |
| ENSACAG00000016603 | 16406 RASD2    |
| ENSACAG00000014939 | 16407 C1QA     |
| ENSACAG00000017615 | 16408 SLITRK3  |
| ENSACAG00000004279 | 16409 KL       |
| ENSACAG00000007218 | 16410 NR0B1    |
| ENSACAG00000025605 | 16411          |
| ENSACAG00000007109 | 16412 SAMD5    |
| ENSACAG00000025305 | 16413          |
| ENSACAG00000013993 | 16414 ASB4     |
| ENSACAG00000029660 | 16415 DUSP28   |
| ENSACAG00000028427 | 16416          |
| ENSACAG00000007503 | 16417 TM4SF18  |
| ENSACAG00000022866 | 16418          |
| ENSACAG00000022026 | 16419          |
| ENSACAG00000028384 | 16420 CAPSL    |

|                    |                |
|--------------------|----------------|
| ENSACAG00000002830 | 16421 WSCD2    |
| ENSACAG00000029031 | 16422 THY1     |
| ENSACAG00000023679 | 16423          |
| ENSACAG00000014314 | 16424 SLC25A53 |
| ENSACAG00000015303 | 16425 PKDREJ   |
| ENSACAG00000005217 | 16426 LRRN3    |
| ENSACAG00000028286 | 16427          |
| ENSACAG00000015617 | 16428 FGG      |
| ENSACAG00000002870 | 16429          |
| ENSACAG00000029559 | 16430          |
| ENSACAG00000023962 | 16431 NHSL2    |
| ENSACAG00000007844 | 16432          |
| ENSACAG00000024271 | 16433 CXCR3    |
| ENSACAG00000029293 | 16434          |
| ENSACAG00000023804 | 16435          |
| ENSACAG00000015633 | 16436          |
| ENSACAG00000026255 | 16437          |
| ENSACAG00000028953 | 16438          |
| ENSACAG00000007993 | 16439          |
| ENSACAG00000000824 | 16440          |
| ENSACAG00000028302 | 16441          |
| ENSACAG00000016322 | 16442          |
| ENSACAG00000009664 | 16443          |
| ENSACAG00000029399 | 16444          |
| ENSACAG00000004510 | 16445 DTX1     |
| ENSACAG00000028696 | 16446 TMEM150B |
| ENSACAG00000014582 | 16447          |
| ENSACAG00000001736 | 16448 AMIGO2   |
| ENSACAG00000004073 | 16449          |
| ENSACAG00000028827 | 16450          |
| ENSACAG00000011756 | 16451          |
| ENSACAG00000028334 | 16452          |
| ENSACAG00000029639 | 16453          |
| ENSACAG00000022891 | 16454          |
| ENSACAG00000024467 | 16455          |
| ENSACAG00000010972 | 16456 HTR5A    |
| ENSACAG00000011016 | 16457          |
| ENSACAG00000005106 | 16458 RAG1     |
| ENSACAG00000016249 | 16459 KLHDC7A  |
| ENSACAG00000012635 | 16460          |
| ENSACAG00000028506 | 16461          |
| ENSACAG00000005416 | 16462          |



ENSACAG00000006816  
ENSACAG00000028792  
ENSACAG00000013911

16463  
16464 SPX  
16465 TLR4
