# Supplementary material
Source: PubMed Central journal article supplement (PMC6180209)
Supplement: NIHMS905624-supplement-3.pdf [file NIHMS905624-supplement-3.pdf]

**Mouse Ranked Gene List**

| <b>Gene</b>        | <b>Ranks</b> | <b>Symbol</b> |
|--------------------|--------------|---------------|
| ENSMUSG00000064341 | 1            | mt-Nd1        |
| ENSMUSG00000064370 | 2            | mt-Cytb       |
| ENSMUSG00000064351 | 3            | mt-Co1        |
| ENSMUSG00000064345 | 4            | mt-Nd2        |
| ENSMUSG00000024661 | 5            | Fth1          |
| ENSMUSG00000064337 | 6            | mt-Rnr1       |
| ENSMUSG00000064368 | 7            | mt-Nd6        |
| ENSMUSG00000064367 | 8            | mt-Nd5        |
| ENSMUSG00000023944 | 9            | Hsp90ab1      |
| ENSMUSG00000032399 | 10           | Rpl4          |
| ENSMUSG00000064339 | 11           | mt-Rnr2       |
| ENSMUSG00000068220 | 12           | Lgals1        |
| ENSMUSG00000064363 | 13           | mt-Nd4        |
| ENSMUSG00000037742 | 14           | Eef1a1        |
| ENSMUSG00000026728 | 15           | Vim           |
| ENSMUSG00000025393 | 16           | Atp5b         |
| ENSMUSG00000034994 | 17           | Eef2          |
| ENSMUSG00000029580 | 18           | Actb          |
| ENSMUSG00000057113 | 19           | Npm1          |
| ENSMUSG00000012848 | 20           | Rps5          |
| ENSMUSG00000024803 | 21           | Ankrd1        |
| ENSMUSG00000003970 | 22           | Rpl8          |
| ENSMUSG00000022283 | 23           | Pabpc1        |
| ENSMUSG00000063229 | 24           | Ldha          |
| ENSMUSG00000032294 | 25           | Pkm           |
| ENSMUSG00000025351 | 26           | Cd63          |
| ENSMUSG00000063457 | 27           | Rps15         |
| ENSMUSG00000030695 | 28           | Aldoa         |
| ENSMUSG00000067274 | 29           | Rplp0         |
| ENSMUSG00000025362 | 30           | Rps26         |
| ENSMUSG00000028639 | 31           | Ybx1          |
| ENSMUSG00000031207 | 32           | Msn           |
| ENSMUSG00000079264 | 33           | Gm11077       |
| ENSMUSG00000049775 | 34           | Tmsb4x        |
| ENSMUSG00000074129 | 35           | Rpl13a        |
| ENSMUSG00000018593 | 36           | Sparc         |
| ENSMUSG00000007892 | 37           | Rplp1         |
| ENSMUSG00000024359 | 38           | Hspa9         |
| ENSMUSG00000030189 | 39           | Ybx3          |
| ENSMUSG00000078812 | 40           | Eif5a         |

|                     |              |
|---------------------|--------------|
| ENSMUSG00000024608  | 41 Rps14     |
| ENSMUSG00000028333  | 42 Anp32b    |
| ENSMUSG00000064372  | 43 mt-Tp     |
| ENSMUSG00000009471  | 44 Myod1     |
| ENSMUSG00000001525  | 45 Tubb5     |
| ENSMUSG00000106106  | 46 Rn18s-rs5 |
| ENSMUSG00000020849  | 47 Ywhae     |
| ENSMUSG00000028367  | 48 Txn1      |
| ENSMUSG00000004980  | 49 Hnrnpa2b1 |
| ENSMUSG000000056201 | 50 Cfl1      |
| ENSMUSG00000001025  | 51 S100a6    |
| ENSMUSG00000025290  | 52 Rps24     |
| ENSMUSG000000005610 | 53 Eif4g2    |
| ENSMUSG00000025809  | 54 Itgb1     |
| ENSMUSG00000029304  | 55 Spp1      |
| ENSMUSG00000030057  | 56 Cnbp      |
| ENSMUSG00000022982  | 57 Sod1      |
| ENSMUSG00000026864  | 58 Hspa5     |
| ENSMUSG00000025428  | 59 Atp5a1    |
| ENSMUSG00000050708  | 60 Ftl1      |
| ENSMUSG00000036438  | 61 Calm2     |
| ENSMUSG00000003429  | 62 Rps11     |
| ENSMUSG00000014599  | 63 Csf1      |
| ENSMUSG00000026234  | 64 Ncl       |
| ENSMUSG00000032231  | 65 Anxa2     |
| ENSMUSG00000034024  | 66 Cct2      |
| ENSMUSG00000018293  | 67 Pfn1      |
| ENSMUSG000000081603 | 68 Gm14681   |
| ENSMUSG00000032216  | 69 Nedd4     |
| ENSMUSG00000030744  | 70 Rps3      |
| ENSMUSG00000006304  | 71 Arpc2     |
| ENSMUSG00000024587  | 72 Nars      |
| ENSMUSG00000024091  | 73 Vapa      |
| ENSMUSG00000000753  | 74 Serpinf1  |
| ENSMUSG00000024991  | 75 Eif3a     |
| ENSMUSG00000020250  | 76 Txnrd1    |
| ENSMUSG00000107176  | 77 Gm9794    |
| ENSMUSG00000025980  | 78 Hspd1     |
| ENSMUSG00000030738  | 79 Eif3c     |
| ENSMUSG00000028967  | 80 Errfi1    |
| ENSMUSG00000042406  | 81 Atf4      |
| ENSMUSG00000018770  | 82 Atp5g3    |

|                    |               |
|--------------------|---------------|
| ENSMUSG00000025132 | 83 Arhgdia    |
| ENSMUSG00000029777 | 84 Gars       |
| ENSMUSG00000057841 | 85 Rpl32      |
| ENSMUSG00000020048 | 86 Hsp90b1    |
| ENSMUSG00000021477 | 87 Ctst       |
| ENSMUSG00000056758 | 88 Hmga2      |
| ENSMUSG00000070348 | 89 Ccnd1      |
| ENSMUSG00000031320 | 90 Rps4x      |
| ENSMUSG00000006333 | 91 Rps9       |
| ENSMUSG00000025967 | 92 Eef1b2     |
| ENSMUSG00000027248 | 93 Pdia3      |
| ENSMUSG00000023150 | 94 Ivns1abp   |
| ENSMUSG00000031490 | 95 Eif4ebp1   |
| ENSMUSG00000022312 | 96 Eif3h      |
| ENSMUSG00000021996 | 97 Esd        |
| ENSMUSG00000092341 | 98 Malat1     |
| ENSMUSG00000020719 | 99 Ddx5       |
| ENSMUSG00000001794 | 100 Capns1    |
| ENSMUSG00000093674 | 101 Rpl41     |
| ENSMUSG00000006699 | 102 Cdc42     |
| ENSMUSG00000001473 | 103 Tubb6     |
| ENSMUSG00000028195 | 104 Cyr61     |
| ENSMUSG00000058655 | 105 Eif4b     |
| ENSMUSG00000028381 | 106 Ugcg      |
| ENSMUSG00000027107 | 107 Chrna1    |
| ENSMUSG00000025613 | 108 Cct8      |
| ENSMUSG00000024640 | 109 Psat1     |
| ENSMUSG00000032366 | 110 Tpm1      |
| ENSMUSG00000037062 | 111 Sh3glb1   |
| ENSMUSG00000036751 | 112 Cox6b1    |
| ENSMUSG00000006932 | 113 Ctnnb1    |
| ENSMUSG00000005732 | 114 Ranbp1    |
| ENSMUSG00000023905 | 115 Tnfrsf12a |
| ENSMUSG00000041959 | 116 S100a10   |
| ENSMUSG00000028745 | 117 Capzb     |
| ENSMUSG00000032966 | 118 Fkbp1a    |
| ENSMUSG00000023175 | 119 Bsg       |
| ENSMUSG00000003814 | 120 Calr      |
| ENSMUSG00000022234 | 121 Cct5      |
| ENSMUSG00000025364 | 122 Pa2g4     |
| ENSMUSG00000053768 | 123 Chchd3    |
| ENSMUSG00000003955 | 124 Fam162a   |

|                     |                   |
|---------------------|-------------------|
| ENSMUSG00000015837  | 125 Sqstm1        |
| ENSMUSG00000020372  | 126 Gnb2l1        |
| ENSMUSG00000028820  | 127 Sfpq          |
| ENSMUSG00000029767  | 128 Calu          |
| ENSMUSG00000030409  | 129 Dmpk          |
| ENSMUSG00000033161  | 130 Atp1a1        |
| ENSMUSG000000101585 | 131 1600010M07Rik |
| ENSMUSG00000020458  | 132 Rtn4          |
| ENSMUSG00000020649  | 133 Rrm2          |
| ENSMUSG00000020368  | 134 Canx          |
| ENSMUSG00000029447  | 135 Cct6a         |
| ENSMUSG00000027620  | 136 Rbm39         |
| ENSMUSG00000042043  | 137 Tbca          |
| ENSMUSG00000009079  | 138 Ewsr1         |
| ENSMUSG00000023067  | 139 Cdkn1a        |
| ENSMUSG00000029752  | 140 Asns          |
| ENSMUSG00000020680  | 141 Taf15         |
| ENSMUSG00000039001  | 142 Rps21         |
| ENSMUSG000000054808 | 143 Actn4         |
| ENSMUSG00000004897  | 144 Hdgf          |
| ENSMUSG000000053907 | 145 Mat2a         |
| ENSMUSG000000016319 | 146 Slc25a5       |
| ENSMUSG00000007891  | 147 Ctsd          |
| ENSMUSG000000019179 | 148 Mdh2          |
| ENSMUSG000000025794 | 149 Rpl14         |
| ENSMUSG000000028063 | 150 Lmna          |
| ENSMUSG000000020267 | 151 Hint1         |
| ENSMUSG000000025508 | 152 Rplp2         |
| ENSMUSG000000024844 | 153 Banf1         |
| ENSMUSG000000029064 | 154 Gnb1          |
| ENSMUSG000000037815 | 155 Ctnna1        |
| ENSMUSG000000025403 | 156 Shmt2         |
| ENSMUSG000000031765 | 157 Mt1           |
| ENSMUSG000000024659 | 158 Anxa1         |
| ENSMUSG000000028837 | 159 Psmb2         |
| ENSMUSG000000005087 | 160 Cd44          |
| ENSMUSG000000018340 | 161 Anxa6         |
| ENSMUSG000000026914 | 162 Psmd14        |
| ENSMUSG000000092329 | 163 Gm20388       |
| ENSMUSG000000060147 | 164 Serpinb6a     |
| ENSMUSG000000040385 | 165 Ppp1ca        |
| ENSMUSG000000043716 | 166 Rpl7          |

|                     |              |
|---------------------|--------------|
| ENSMUSG00000025130  | 167 P4hb     |
| ENSMUSG00000024740  | 168 Ddb1     |
| ENSMUSG00000000031  | 169 H19      |
| ENSMUSG000000000787 | 170 Ddx3x    |
| ENSMUSG00000026208  | 171 Des      |
| ENSMUSG00000074813  | 172 Gm14005  |
| ENSMUSG00000031447  | 173 Lamp1    |
| ENSMUSG00000022952  | 174 Runx1    |
| ENSMUSG00000005846  | 175 Rsl1d1   |
| ENSMUSG00000023456  | 176 Tpi1     |
| ENSMUSG00000031508  | 177 Ankrd10  |
| ENSMUSG00000027712  | 178 Anxa5    |
| ENSMUSG00000068882  | 179 Ssb      |
| ENSMUSG00000020585  | 180 Laptm4a  |
| ENSMUSG00000041697  | 181 Cox6a1   |
| ENSMUSG00000055723  | 182 Rras2    |
| ENSMUSG00000029761  | 183 Cald1    |
| ENSMUSG00000091041  | 184 Gm17720  |
| ENSMUSG00000026305  | 185 Lrrfip1  |
| ENSMUSG00000021024  | 186 Psma6    |
| ENSMUSG00000084319  | 187 Tpt1-ps3 |
| ENSMUSG00000025781  | 188 Atp5c1   |
| ENSMUSG00000022443  | 189 Myh9     |
| ENSMUSG00000014769  | 190 Psmb1    |
| ENSMUSG00000024381  | 191 Bin1     |
| ENSMUSG00000053565  | 192 Eif3k    |
| ENSMUSG00000027828  | 193 Ssr3     |
| ENSMUSG00000031633  | 194 Slc25a4  |
| ENSMUSG00000044533  | 195 Rps2     |
| ENSMUSG00000006728  | 196 Cdk4     |
| ENSMUSG00000030774  | 197 Pak1     |
| ENSMUSG00000048076  | 198 Arf1     |
| ENSMUSG00000007041  | 199 Clic1    |
| ENSMUSG00000007739  | 200 Cct4     |
| ENSMUSG00000022884  | 201 Eif4a2   |
| ENSMUSG00000021546  | 202 Hnrnpk   |
| ENSMUSG00000031954  | 203 Cfdp1    |
| ENSMUSG00000002602  | 204 Axl      |
| ENSMUSG00000015143  | 205 Actn1    |
| ENSMUSG00000098973  | 206 Mir6236  |
| ENSMUSG00000063506  | 207 Arhgap22 |
| ENSMUSG00000026701  | 208 Prdx6    |

|                    |              |
|--------------------|--------------|
| ENSMUSG00000040212 | 209 Emp3     |
| ENSMUSG00000005413 | 210 Hmox1    |
| ENSMUSG00000022336 | 211 Eif3e    |
| ENSMUSG00000001924 | 212 Uba1     |
| ENSMUSG00000021218 | 213 Gdi2     |
| ENSMUSG00000096768 | 214 Erdr1    |
| ENSMUSG00000020361 | 215 Hspa4    |
| ENSMUSG00000042354 | 216 Gnl3     |
| ENSMUSG00000057193 | 217 Slc44a2  |
| ENSMUSG00000039542 | 218 Ncam1    |
| ENSMUSG00000020612 | 219 Prkar1a  |
| ENSMUSG00000026074 | 220 Map4k4   |
| ENSMUSG00000031328 | 221 Flna     |
| ENSMUSG00000053332 | 222 Gas5     |
| ENSMUSG00000045983 | 223 Eif4g1   |
| ENSMUSG00000004207 | 224 Psap     |
| ENSMUSG00000042688 | 225 Mapk6    |
| ENSMUSG00000030557 | 226 Mef2a    |
| ENSMUSG00000001440 | 227 Kpnb1    |
| ENSMUSG00000020644 | 228 Id2      |
| ENSMUSG00000071644 | 229 Eef1g    |
| ENSMUSG00000062078 | 230 Qk       |
| ENSMUSG00000090841 | 231 Myl6     |
| ENSMUSG00000024907 | 232 Gal      |
| ENSMUSG00000010376 | 233 Nedd8    |
| ENSMUSG00000029328 | 234 Hnrnpdl  |
| ENSMUSG00000070436 | 235 Serpinh1 |
| ENSMUSG00000016559 | 236 H3f3b    |
| ENSMUSG00000031353 | 237 Rbbp7    |
| ENSMUSG00000029169 | 238 Dhx15    |
| ENSMUSG00000018848 | 239 Rars     |
| ENSMUSG00000006356 | 240 Crip2    |
| ENSMUSG00000068039 | 241 Tcp1     |
| ENSMUSG00000031762 | 242 Mt2      |
| ENSMUSG00000060126 | 243 Tpt1     |
| ENSMUSG00000021282 | 244 Eif5     |
| ENSMUSG00000020402 | 245 Vdac1    |
| ENSMUSG00000001833 | 246 Sept7    |
| ENSMUSG00000019432 | 247 Ddx39b   |
| ENSMUSG00000025066 | 248 Sfr1     |
| ENSMUSG00000022551 | 249 Cyc1     |
| ENSMUSG00000025630 | 250 Hprt     |

|                    |                   |
|--------------------|-------------------|
| ENSMUSG00000027067 | 251 Ssrp1         |
| ENSMUSG00000035885 | 252 Cox8a         |
| ENSMUSG00000029430 | 253 Ran           |
| ENSMUSG00000025348 | 254 Itga7         |
| ENSMUSG00000026547 | 255 Tagln2        |
| ENSMUSG00000021290 | 256 2010107E04Rik |
| ENSMUSG00000024912 | 257 Fosl1         |
| ENSMUSG00000027423 | 258 Snx5          |
| ENSMUSG00000017009 | 259 Sdc4          |
| ENSMUSG00000018326 | 260 Ywhab         |
| ENSMUSG00000074415 | 261 2610203C20Rik |
| ENSMUSG00000028416 | 262 Bag1          |
| ENSMUSG00000053931 | 263 Cnn3          |
| ENSMUSG00000024493 | 264 Lars          |
| ENSMUSG00000021832 | 265 Psmc6         |
| ENSMUSG00000042699 | 266 Dhx9          |
| ENSMUSG00000031422 | 267 Morf4l2       |
| ENSMUSG00000058704 | 268 Memo1         |
| ENSMUSG00000026970 | 269 Rbms1         |
| ENSMUSG00000022285 | 270 Ywhaz         |
| ENSMUSG00000047187 | 271 Rab2a         |
| ENSMUSG00000033047 | 272 Eif3l         |
| ENSMUSG00000038119 | 273 Cdon          |
| ENSMUSG00000028081 | 274 Rps3a1        |
| ENSMUSG00000024966 | 275 Stip1         |
| ENSMUSG00000036427 | 276 Gpi1          |
| ENSMUSG00000052833 | 277 Sae1          |
| ENSMUSG00000020949 | 278 Fkbp3         |
| ENSMUSG00000029581 | 279 Fscn1         |
| ENSMUSG00000056612 | 280 Ppp1r14b      |
| ENSMUSG00000039361 | 281 Picalm        |
| ENSMUSG00000024097 | 282 Srsf7         |
| ENSMUSG00000024425 | 283 Ndfip1        |
| ENSMUSG00000026276 | 284 Sept2         |
| ENSMUSG00000028692 | 285 Akr1a1        |
| ENSMUSG00000068823 | 286 Csde1         |
| ENSMUSG00000040731 | 287 Eif4h         |
| ENSMUSG00000015165 | 288 Hnrnp1        |
| ENSMUSG00000061613 | 289 U2af1         |
| ENSMUSG00000082536 | 290 Gm13456       |
| ENSMUSG00000041028 | 291 Ghitm         |
| ENSMUSG00000022890 | 292 Atp5j         |

|                    |             |
|--------------------|-------------|
| ENSMUSG00000058013 | 293 Sept11  |
| ENSMUSG00000020869 | 294 Lrrc59  |
| ENSMUSG00000039067 | 295 Psmc7   |
| ENSMUSG00000029467 | 296 Atp2a2  |
| ENSMUSG00000022892 | 297 App     |
| ENSMUSG00000027184 | 298 Caprin1 |
| ENSMUSG00000020708 | 299 Psmc5   |
| ENSMUSG00000031311 | 300 Nono    |
| ENSMUSG00000028936 | 301 Rpl22   |
| ENSMUSG00000058799 | 302 Nap1l1  |
| ENSMUSG00000009927 | 303 Rps25   |
| ENSMUSG00000037242 | 304 Clic4   |
| ENSMUSG00000026615 | 305 Eprs    |
| ENSMUSG00000018932 | 306 Map2k3  |
| ENSMUSG00000005683 | 307 Cs      |
| ENSMUSG00000021701 | 308 Plk2    |
| ENSMUSG00000024576 | 309 Csnk1a1 |
| ENSMUSG00000068240 | 310 Gm11808 |
| ENSMUSG00000056076 | 311 Eif3b   |
| ENSMUSG00000021377 | 312 Dek     |
| ENSMUSG00000020358 | 313 Hnrnpab |
| ENSMUSG00000063882 | 314 Uqcrh   |
| ENSMUSG00000070319 | 315 Eif3g   |
| ENSMUSG00000032026 | 316 Rexo2   |
| ENSMUSG00000039197 | 317 Adk     |
| ENSMUSG00000030591 | 318 Psmc8   |
| ENSMUSG00000028964 | 319 Park7   |
| ENSMUSG00000010095 | 320 Slc3a2  |
| ENSMUSG00000037706 | 321 Cd81    |
| ENSMUSG00000029247 | 322 Paics   |
| ENSMUSG00000024953 | 323 Prdx5   |
| ENSMUSG00000020571 | 324 Pdia6   |
| ENSMUSG00000026042 | 325 Col5a2  |
| ENSMUSG00000003873 | 326 Bax     |
| ENSMUSG00000040459 | 327 Arglu1  |
| ENSMUSG00000031799 | 328 Tpm4    |
| ENSMUSG00000027907 | 329 S100a11 |
| ENSMUSG00000000088 | 330 Cox5a   |
| ENSMUSG00000005779 | 331 Psmc4   |
| ENSMUSG00000017421 | 332 Zfp207  |
| ENSMUSG00000059208 | 333 Hnrnpm  |
| ENSMUSG00000063524 | 334 Eno1    |



|                    |                   |
|--------------------|-------------------|
| ENSMUSG00000024360 | 335 Etf1          |
| ENSMUSG00000027108 | 336 Ola1          |
| ENSMUSG00000032412 | 337 Atp1b3        |
| ENSMUSG00000028656 | 338 Cap1          |
| ENSMUSG00000060373 | 339 Hnrnpc        |
| ENSMUSG00000086841 | 340 2410006H16Rik |
| ENSMUSG00000022698 | 341 Naa50         |
| ENSMUSG00000033307 | 342 Mif           |
| ENSMUSG00000027195 | 343 Hsd17b12      |
| ENSMUSG00000056515 | 344 Rab31         |
| ENSMUSG00000028771 | 345 Ptpn12        |
| ENSMUSG00000050335 | 346 Lgals3        |
| ENSMUSG00000021270 | 347 Hsp90aa1      |
| ENSMUSG00000009376 | 348 Met           |
| ENSMUSG00000030357 | 349 Fkbp4         |
| ENSMUSG00000055436 | 350 Srsf11        |
| ENSMUSG00000015671 | 351 Psma2         |
| ENSMUSG00000047675 | 352 Rps8          |
| ENSMUSG00000035199 | 353 Arl6ip5       |
| ENSMUSG00000022346 | 354 Myc           |
| ENSMUSG00000018286 | 355 Psmb6         |
| ENSMUSG00000022354 | 356 Ndufb9        |
| ENSMUSG00000030122 | 357 Ptms          |
| ENSMUSG00000027893 | 358 Ahcyl1        |
| ENSMUSG00000061904 | 359 Slc25a3       |
| ENSMUSG00000071415 | 360 Rpl23         |
| ENSMUSG00000001056 | 361 Nhp2          |
| ENSMUSG00000028378 | 362 Ptgr1         |
| ENSMUSG00000051391 | 363 Ywhag         |
| ENSMUSG00000051695 | 364 Pcbp1         |
| ENSMUSG00000038400 | 365 Pmepa1        |
| ENSMUSG00000007850 | 366 Hnrnph1       |
| ENSMUSG00000030662 | 367 Ipo5          |
| ENSMUSG00000022462 | 368 Slc38a2       |
| ENSMUSG00000037411 | 369 Serpine1      |
| ENSMUSG00000052681 | 370 Rap1b         |
| ENSMUSG00000001416 | 371 Cct3          |
| ENSMUSG00000037608 | 372 Bclaf1        |
| ENSMUSG00000106037 | 373 Gm4332        |
| ENSMUSG00000010608 | 374 Rbm25         |
| ENSMUSG00000038014 | 375 Fam120a       |
| ENSMUSG00000075229 | 376 Ccdc58        |

|                    |             |
|--------------------|-------------|
| ENSMUSG00000030096 | 377 Slc6a6  |
| ENSMUSG00000038482 | 378 Tfdp1   |
| ENSMUSG00000030751 | 379 Psma1   |
| ENSMUSG00000037149 | 380 Ddx1    |
| ENSMUSG00000045128 | 381 Rpl18a  |
| ENSMUSG00000023951 | 382 Vegfa   |
| ENSMUSG00000026229 | 383 Psmc1   |
| ENSMUSG00000061983 | 384 Rps12   |
| ENSMUSG00000026356 | 385 Dars    |
| ENSMUSG00000001175 | 386 Calm1   |
| ENSMUSG00000011179 | 387 Odc1    |
| ENSMUSG00000039218 | 388 Srrm2   |
| ENSMUSG00000039910 | 389 Cited2  |
| ENSMUSG00000021877 | 390 Arf4    |
| ENSMUSG00000021660 | 391 Btf3    |
| ENSMUSG00000021771 | 392 Vdac2   |
| ENSMUSG00000028221 | 393 Tmem55a |
| ENSMUSG00000002015 | 394 Bcap31  |
| ENSMUSG00000022477 | 395 Aco2    |
| ENSMUSG00000055302 | 396 Mrfap1  |
| ENSMUSG00000040463 | 397 Mybbp1a |
| ENSMUSG00000019818 | 398 Cd164   |
| ENSMUSG00000021549 | 399 Rasa1   |
| ENSMUSG00000047459 | 400 Dynlrb1 |
| ENSMUSG00000031841 | 401 Cdh13   |
| ENSMUSG00000016487 | 402 Ppfibp1 |
| ENSMUSG00000058355 | 403 Abce1   |
| ENSMUSG00000097971 | 404 Gm26917 |
| ENSMUSG00000026238 | 405 Ptma    |
| ENSMUSG00000021111 | 406 Papola  |
| ENSMUSG00000036781 | 407 Rps27l  |
| ENSMUSG00000004891 | 408 Nes     |
| ENSMUSG00000024538 | 409 Ppic    |
| ENSMUSG00000003072 | 410 Atp5d   |
| ENSMUSG00000021178 | 411 Psmc1   |
| ENSMUSG00000030007 | 412 Cct7    |
| ENSMUSG00000060600 | 413 Eno3    |
| ENSMUSG00000068739 | 414 Sars    |
| ENSMUSG00000041881 | 415 Ndufa7  |
| ENSMUSG00000005667 | 416 Mthfd2  |
| ENSMUSG00000019978 | 417 Epb41l2 |
| ENSMUSG00000002477 | 418 Snrpd1  |

|                     |                   |
|---------------------|-------------------|
| ENSMUSG00000022748  | 419 Cmss1         |
| ENSMUSG00000064349  | 420 mt-Tc         |
| ENSMUSG00000004789  | 421 Dlst          |
| ENSMUSG00000020664  | 422 Dld           |
| ENSMUSG00000021486  | 423 Prelid1       |
| ENSMUSG00000028937  | 424 Acot7         |
| ENSMUSG00000016921  | 425 Srsf6         |
| ENSMUSG00000021037  | 426 Ahsa1         |
| ENSMUSG00000001424  | 427 Snd1          |
| ENSMUSG000000051223 | 428 Bzw1          |
| ENSMUSG00000092203  | 429 1110038B12Rik |
| ENSMUSG00000033732  | 430 Sf3b3         |
| ENSMUSG00000029614  | 431 Rpl6          |
| ENSMUSG00000037851  | 432 Iars          |
| ENSMUSG00000041203  | 433 2310036O22Rik |
| ENSMUSG00000026341  | 434 Actr3         |
| ENSMUSG00000032380  | 435 Dapk2         |
| ENSMUSG00000059534  | 436 Uqcr10        |
| ENSMUSG00000031701  | 437 Dnaja2        |
| ENSMUSG00000029840  | 438 Mtpn          |
| ENSMUSG00000026796  | 439 Fam129b       |
| ENSMUSG00000028478  | 440 Clta          |
| ENSMUSG00000001918  | 441 Slc1a5        |
| ENSMUSG00000025580  | 442 Eif4a3        |
| ENSMUSG00000061032  | 443 Rrp1          |
| ENSMUSG00000027566  | 444 Psmc7         |
| ENSMUSG00000023010  | 445 Tmbim6        |
| ENSMUSG00000024853  | 446 Sf3b2         |
| ENSMUSG00000020149  | 447 Rab1a         |
| ENSMUSG00000033423  | 448 Eri3          |
| ENSMUSG00000054863  | 449 Fam19a5       |
| ENSMUSG00000034349  | 450 Smc4          |
| ENSMUSG00000015749  | 451 Anp32e        |
| ENSMUSG00000060803  | 452 Gstp1         |
| ENSMUSG00000037072  | 453 15-Sep        |
| ENSMUSG00000018379  | 454 Srsf1         |
| ENSMUSG00000027404  | 455 Snrpb         |
| ENSMUSG00000071172  | 456 Srsf3         |
| ENSMUSG00000062981  | 457 Mrpl42        |
| ENSMUSG00000045962  | 458 Wnk1          |
| ENSMUSG00000007836  | 459 Hnrnpa0       |
| ENSMUSG00000042745  | 460 Id1           |

|                    |             |
|--------------------|-------------|
| ENSMUSG00000031129 | 461 Slc9a9  |
| ENSMUSG00000068184 | 462 Ndufaf2 |
| ENSMUSG00000040269 | 463 Mrps28  |
| ENSMUSG00000020547 | 464 Bzw2    |
| ENSMUSG00000022108 | 465 Itm2b   |
| ENSMUSG00000055065 | 466 Ddx17   |
| ENSMUSG00000024474 | 467 Ik      |
| ENSMUSG00000020075 | 468 Ddx21   |
| ENSMUSG00000075014 | 469 Gm10800 |
| ENSMUSG00000031078 | 470 Ctn     |
| ENSMUSG00000018446 | 471 C1qbp   |
| ENSMUSG00000063511 | 472 Snrnp70 |
| ENSMUSG00000040225 | 473 Prrc2c  |
| ENSMUSG00000030224 | 474 Strap   |
| ENSMUSG00000047879 | 475 Usp14   |
| ENSMUSG00000015961 | 476 Adss    |
| ENSMUSG00000027613 | 477 Eif6    |
| ENSMUSG00000028691 | 478 Prdx1   |
| ENSMUSG00000032330 | 479 Cox7a2  |
| ENSMUSG00000026260 | 480 Ndufa10 |
| ENSMUSG00000021577 | 481 Sdha    |
| ENSMUSG00000023004 | 482 Tuba1b  |
| ENSMUSG00000022403 | 483 St13    |
| ENSMUSG00000027342 | 484 Pdna    |
| ENSMUSG00000079139 | 485 Gm4204  |
| ENSMUSG00000021134 | 486 Srsf5   |
| ENSMUSG00000064797 | 487 Gm24357 |
| ENSMUSG00000024914 | 488 Drap1   |
| ENSMUSG00000019961 | 489 Tmpo    |
| ENSMUSG00000032479 | 490 Map4    |
| ENSMUSG00000031231 | 491 Cox7b   |
| ENSMUSG00000024387 | 492 Csnk2b  |
| ENSMUSG00000031948 | 493 Kars    |
| ENSMUSG00000032562 | 494 Gnai2   |
| ENSMUSG00000020720 | 495 Psm12   |
| ENSMUSG00000022241 | 496 Tars    |
| ENSMUSG00000028788 | 497 Ptp4a2  |
| ENSMUSG00000027940 | 498 Tpm3    |
| ENSMUSG00000037563 | 499 Rps16   |
| ENSMUSG00000020184 | 500 Mdm2    |
| ENSMUSG00000021537 | 501 Cetn3   |
| ENSMUSG00000022139 | 502 Mbnl2   |

|                     |              |
|---------------------|--------------|
| ENSMUSG00000020089  | 503 Ppa1     |
| ENSMUSG00000040945  | 504 Rcc2     |
| ENSMUSG00000032002  | 505 Dcun1d5  |
| ENSMUSG00000029823  | 506 Luc7l2   |
| ENSMUSG00000018697  | 507 Aatf     |
| ENSMUSG00000026192  | 508 Atic     |
| ENSMUSG00000030647  | 509 Ndufc2   |
| ENSMUSG00000032383  | 510 Ppib     |
| ENSMUSG00000000171  | 511 Sdhd     |
| ENSMUSG000000059119 | 512 Nap1l4   |
| ENSMUSG00000035783  | 513 Acta2    |
| ENSMUSG00000028693  | 514 Nasp     |
| ENSMUSG00000030795  | 515 Fus      |
| ENSMUSG00000020914  | 516 Top2a    |
| ENSMUSG000000094483 | 517 Purb     |
| ENSMUSG000000041057 | 518 Wdr43    |
| ENSMUSG00000021737  | 519 Psmc6    |
| ENSMUSG00000048612  | 520 Myof     |
| ENSMUSG00000026245  | 521 Farsb    |
| ENSMUSG00000006442  | 522 Srm      |
| ENSMUSG00000040675  | 523 Mthfd1l  |
| ENSMUSG000000059248 | 524 Sept9    |
| ENSMUSG00000024583  | 525 Txnl1    |
| ENSMUSG00000007872  | 526 Id3      |
| ENSMUSG000000039103 | 527 Nexn     |
| ENSMUSG00000070544  | 528 Top1     |
| ENSMUSG00000039105  | 529 Atp6v1g1 |
| ENSMUSG00000007564  | 530 Ppp2r1a  |
| ENSMUSG00000073676  | 531 Hspe1    |
| ENSMUSG00000081552  | 532 Gm12328  |
| ENSMUSG00000036371  | 533 Serbp1   |
| ENSMUSG00000024304  | 534 Cdh2     |
| ENSMUSG00000093803  | 535 Ppp2r3d  |
| ENSMUSG00000027642  | 536 Rpn2     |
| ENSMUSG00000060938  | 537 Rpl26    |
| ENSMUSG00000030342  | 538 Cd9      |
| ENSMUSG00000028583  | 539 Pdpn     |
| ENSMUSG00000078247  | 540 Airn     |
| ENSMUSG00000029632  | 541 Ndufa4   |
| ENSMUSG00000019849  | 542 Prep     |
| ENSMUSG00000022752  | 543 Tomm70a  |
| ENSMUSG00000022314  | 544 Rad21    |

|                     |              |
|---------------------|--------------|
| ENSMUSG00000023852  | 545 Chd1     |
| ENSMUSG00000006998  | 546 Psmd2    |
| ENSMUSG00000009863  | 547 Sdhb     |
| ENSMUSG00000002107  | 548 Celf2    |
| ENSMUSG00000041189  | 549 Chrn1    |
| ENSMUSG00000005566  | 550 Trim28   |
| ENSMUSG00000033020  | 551 Polr2f   |
| ENSMUSG00000030884  | 552 Uqcrc2   |
| ENSMUSG00000032301  | 553 Psma4    |
| ENSMUSG00000027433  | 554 Xrn2     |
| ENSMUSG00000034088  | 555 Hdlbp    |
| ENSMUSG00000013593  | 556 Ndufs2   |
| ENSMUSG00000025151  | 557 Maged1   |
| ENSMUSG00000047126  | 558 Cltc     |
| ENSMUSG00000041841  | 559 Rpl37    |
| ENSMUSG00000026281  | 560 Dtymk    |
| ENSMUSG00000020580  | 561 Rock2    |
| ENSMUSG00000002102  | 562 Psmc3    |
| ENSMUSG000000097039 | 563 Pvt1     |
| ENSMUSG00000020166  | 564 Cnot2    |
| ENSMUSG00000019804  | 565 Snx3     |
| ENSMUSG00000029635  | 566 Cdk8     |
| ENSMUSG00000015714  | 567 Cers2    |
| ENSMUSG00000018677  | 568 Slc25a39 |
| ENSMUSG00000037197  | 569 Rbm17    |
| ENSMUSG00000020954  | 570 Strn3    |
| ENSMUSG00000031885  | 571 Cbfb     |
| ENSMUSG00000001729  | 572 Akt1     |
| ENSMUSG00000001707  | 573 Eef1e1   |
| ENSMUSG00000030208  | 574 Emp1     |
| ENSMUSG00000044477  | 575 Zfand3   |
| ENSMUSG00000020176  | 576 Grb10    |
| ENSMUSG00000043483  | 577 Gm6863   |
| ENSMUSG00000028792  | 578 Ak2      |
| ENSMUSG00000090553  | 579 Snrpe    |
| ENSMUSG00000021794  | 580 Glud1    |
| ENSMUSG00000029686  | 581 Cul1     |
| ENSMUSG00000025503  | 582 Taldo1   |
| ENSMUSG00000020737  | 583 Hn1      |
| ENSMUSG00000040681  | 584 Hmgn1    |
| ENSMUSG00000062937  | 585 Mtap     |
| ENSMUSG00000080904  | 586 Gm11966  |

|                    |             |
|--------------------|-------------|
| ENSMUSG00000031403 | 587 Dkc1    |
| ENSMUSG00000017677 | 588 Wsb1    |
| ENSMUSG00000071655 | 589 Ubxn1   |
| ENSMUSG00000078652 | 590 Psme3   |
| ENSMUSG00000038991 | 591 Txndc5  |
| ENSMUSG00000057522 | 592 Spop    |
| ENSMUSG00000066568 | 593 Lsm14a  |
| ENSMUSG00000019923 | 594 Zwint   |
| ENSMUSG00000041355 | 595 Ssr2    |
| ENSMUSG00000029484 | 596 Anxa3   |
| ENSMUSG00000028851 | 597 Nudc    |
| ENSMUSG00000032382 | 598 Snx1    |
| ENSMUSG00000031708 | 599 Tecr    |
| ENSMUSG00000021699 | 600 Pde4d   |
| ENSMUSG00000024513 | 601 Mbd2    |
| ENSMUSG00000005054 | 602 Cstb    |
| ENSMUSG00000056851 | 603 Pcbp2   |
| ENSMUSG00000101939 | 604 Gm28438 |
| ENSMUSG00000014294 | 605 Ndufa2  |
| ENSMUSG00000027405 | 606 Nop56   |
| ENSMUSG00000029472 | 607 Anapc5  |
| ENSMUSG00000015176 | 608 Nolc1   |
| ENSMUSG00000024949 | 609 Sf1     |
| ENSMUSG00000028426 | 610 Rad23b  |
| ENSMUSG00000006005 | 611 Tpr     |
| ENSMUSG00000071072 | 612 Ptges3  |
| ENSMUSG00000004936 | 613 Map2k1  |
| ENSMUSG00000069769 | 614 Msi2    |
| ENSMUSG00000020850 | 615 Prpf8   |
| ENSMUSG00000020457 | 616 Drg1    |
| ENSMUSG00000003868 | 617 Ruvbl2  |
| ENSMUSG00000022265 | 618 Ank     |
| ENSMUSG00000063856 | 619 Gpx1    |
| ENSMUSG00000047454 | 620 Gphn    |
| ENSMUSG00000030435 | 621 U2af2   |
| ENSMUSG00000041438 | 622 Cirh1a  |
| ENSMUSG00000069565 | 623 Dazap1  |
| ENSMUSG00000015932 | 624 Dstn    |
| ENSMUSG00000055762 | 625 Eef1d   |
| ENSMUSG00000027881 | 626 Prpf38b |
| ENSMUSG00000026509 | 627 Capn2   |
| ENSMUSG00000029147 | 628 Ppm1g   |

|                     |                   |
|---------------------|-------------------|
| ENSMUSG00000019877  | 629 Serinc1       |
| ENSMUSG00000028609  | 630 Magoh         |
| ENSMUSG00000005981  | 631 Trap1         |
| ENSMUSG000000042462 | 632 Dctpp1        |
| ENSMUSG000000044894 | 633 Uqcrq         |
| ENSMUSG000000075015 | 634 Gm10801       |
| ENSMUSG000000024346 | 635 Pfdn1         |
| ENSMUSG000000067367 | 636 Lyar          |
| ENSMUSG000000084349 | 637 Rpl3-ps1      |
| ENSMUSG000000063870 | 638 Chd4          |
| ENSMUSG000000030663 | 639 1110004F10Rik |
| ENSMUSG000000085183 | 640 Gm12603       |
| ENSMUSG000000021149 | 641 Gtpbp4        |
| ENSMUSG000000021288 | 642 Klcl1         |
| ENSMUSG000000097195 | 643 Snhg5         |
| ENSMUSG000000028961 | 644 Pgd           |
| ENSMUSG000000028059 | 645 Arhgef2       |
| ENSMUSG000000028161 | 646 Ppp3ca        |
| ENSMUSG000000028953 | 647 Abcf2         |
| ENSMUSG000000020994 | 648 Pnn           |
| ENSMUSG000000041168 | 649 Lonp1         |
| ENSMUSG000000009647 | 650 Mcu           |
| ENSMUSG000000011958 | 651 Bnip2         |
| ENSMUSG000000055839 | 652 Tceb2         |
| ENSMUSG000000016664 | 653 Pacsin2       |
| ENSMUSG000000004364 | 654 Cul3          |
| ENSMUSG000000028809 | 655 Srrm1         |
| ENSMUSG000000032314 | 656 Etfa          |
| ENSMUSG000000022272 | 657 Myo10         |
| ENSMUSG000000022437 | 658 Samm50        |
| ENSMUSG000000004383 | 659 Large         |
| ENSMUSG000000061848 | 660 Gm5805        |
| ENSMUSG000000039007 | 661 Cpq           |
| ENSMUSG000000023088 | 662 Abcc1         |
| ENSMUSG000000016256 | 663 Ctsz          |
| ENSMUSG000000052146 | 664 Rps10         |
| ENSMUSG000000026414 | 665 Tnnt2         |
| ENSMUSG000000032397 | 666 Tipin         |
| ENSMUSG000000020422 | 667 Tns3          |
| ENSMUSG000000056899 | 668 Immp2l        |
| ENSMUSG000000028044 | 669 Cks1b         |
| ENSMUSG000000052337 | 670 Immt          |



|                     |                   |
|---------------------|-------------------|
| ENSMUSG00000024067  | 671 Dpy30         |
| ENSMUSG00000041120  | 672 Nbl1          |
| ENSMUSG00000038975  | 673 Rabggtb       |
| ENSMUSG00000030629  | 674 Zfand6        |
| ENSMUSG00000022757  | 675 Tfg           |
| ENSMUSG00000053398  | 676 Phgdh         |
| ENSMUSG00000016541  | 677 Atxn10        |
| ENSMUSG00000018171  | 678 Vmp1          |
| ENSMUSG00000027763  | 679 Mbnl1         |
| ENSMUSG00000024498  | 680 Tcerg1        |
| ENSMUSG00000051154  | 681 Commd3        |
| ENSMUSG00000046223  | 682 Plaur         |
| ENSMUSG00000032060  | 683 Cryab         |
| ENSMUSG00000049327  | 684 Setd8         |
| ENSMUSG00000025289  | 685 Prdx4         |
| ENSMUSG00000028464  | 686 Tpm2          |
| ENSMUSG00000015839  | 687 Nfe2l2        |
| ENSMUSG00000019362  | 688 D8Ertd738e    |
| ENSMUSG00000032212  | 689 Sltm          |
| ENSMUSG00000001627  | 690 Ifrd1         |
| ENSMUSG00000053453  | 691 Thoc7         |
| ENSMUSG00000055239  | 692 Kcmf1         |
| ENSMUSG00000038539  | 693 Atf5          |
| ENSMUSG00000038279  | 694 Nop2          |
| ENSMUSG00000029687  | 695 Ezh2          |
| ENSMUSG00000033940  | 696 Brk1          |
| ENSMUSG00000022010  | 697 Tsc22d1       |
| ENSMUSG00000019777  | 698 Hdac2         |
| ENSMUSG00000016534  | 699 Lamp2         |
| ENSMUSG00000001870  | 700 Ltbp1         |
| ENSMUSG00000027091  | 701 Zc3h15        |
| ENSMUSG00000004096  | 702 Cwc15         |
| ENSMUSG00000026003  | 703 Acadl         |
| ENSMUSG000000081344 | 704 Gm14303       |
| ENSMUSG00000067071  | 705 Hes6          |
| ENSMUSG00000021458  | 706 2010111I01Rik |
| ENSMUSG00000027406  | 707 Idh3b         |
| ENSMUSG00000002365  | 708 Snx9          |
| ENSMUSG00000000399  | 709 Ndufa9        |
| ENSMUSG00000038633  | 710 Degs1         |
| ENSMUSG00000020124  | 711 Usp15         |
| ENSMUSG00000002524  | 712 Puf60         |

|                    |                   |
|--------------------|-------------------|
| ENSMUSG00000032050 | 713 Rdx           |
| ENSMUSG00000020315 | 714 Sptbn1        |
| ENSMUSG00000028633 | 715 Ctps          |
| ENSMUSG00000060591 | 716 Ifitm2        |
| ENSMUSG00000030541 | 717 Idh2          |
| ENSMUSG00000025812 | 718 Pard3         |
| ENSMUSG00000002718 | 719 Cse1l         |
| ENSMUSG00000005103 | 720 Wdr1          |
| ENSMUSG00000030983 | 721 Bccip         |
| ENSMUSG00000026309 | 722 Ilkap         |
| ENSMUSG00000025982 | 723 Sf3b1         |
| ENSMUSG00000026766 | 724 Mmadhc        |
| ENSMUSG00000063787 | 725 Chchd1        |
| ENSMUSG00000032437 | 726 Stt3b         |
| ENSMUSG00000029763 | 727 Exoc4         |
| ENSMUSG00000081051 | 728 Gm15427       |
| ENSMUSG00000019087 | 729 Atp6ap1       |
| ENSMUSG00000033565 | 730 Rbfox2        |
| ENSMUSG00000053510 | 731 Nrd1          |
| ENSMUSG00000062006 | 732 Rpl34         |
| ENSMUSG00000036275 | 733 9530068E07Rik |
| ENSMUSG00000028796 | 734 Phc2          |
| ENSMUSG00000032279 | 735 Idh3a         |
| ENSMUSG00000038467 | 736 Chmp4b        |
| ENSMUSG00000039128 | 737 Cdc123        |
| ENSMUSG00000059552 | 738 Trp53         |
| ENSMUSG00000028649 | 739 Macf1         |
| ENSMUSG00000027018 | 740 Hat1          |
| ENSMUSG00000038615 | 741 Nfe2l1        |
| ENSMUSG00000005575 | 742 Ube2m         |
| ENSMUSG00000041133 | 743 Smc1a         |
| ENSMUSG00000056737 | 744 Capg          |
| ENSMUSG00000057322 | 745 Rpl38         |
| ENSMUSG00000025246 | 746 Tbl1x         |
| ENSMUSG00000029066 | 747 Mrpl20        |
| ENSMUSG00000022427 | 748 Tomm22        |
| ENSMUSG00000014226 | 749 Cacybp        |
| ENSMUSG00000061360 | 750 Phf5a         |
| ENSMUSG00000025823 | 751 Pdia4         |
| ENSMUSG00000079111 | 752 Kdelr2        |
| ENSMUSG00000038668 | 753 Lpar1         |
| ENSMUSG00000030603 | 754 Psmc4         |

|                    |             |
|--------------------|-------------|
| ENSMUSG00000024012 | 755 Mtch1   |
| ENSMUSG00000028631 | 756 Kcnq4   |
| ENSMUSG00000035530 | 757 Eif1    |
| ENSMUSG00000037364 | 758 Srrt    |
| ENSMUSG00000036752 | 759 Tubb4b  |
| ENSMUSG00000024099 | 760 Ndufv2  |
| ENSMUSG00000048376 | 761 F2r     |
| ENSMUSG00000020152 | 762 Actr2   |
| ENSMUSG00000021843 | 763 Ktn1    |
| ENSMUSG00000040078 | 764 Gm9769  |
| ENSMUSG00000079523 | 765 Tmsb10  |
| ENSMUSG00000029817 | 766 Tra2a   |
| ENSMUSG00000028180 | 767 Zranb2  |
| ENSMUSG00000026553 | 768 Copa    |
| ENSMUSG00000005312 | 769 Ubqln1  |
| ENSMUSG00000027002 | 770 Nckap1  |
| ENSMUSG00000057561 | 771 Eif1a   |
| ENSMUSG00000028896 | 772 Rcc1    |
| ENSMUSG00000030082 | 773 Sec61a1 |
| ENSMUSG00000030061 | 774 Uba3    |
| ENSMUSG00000032637 | 775 Atxn2l  |
| ENSMUSG00000062647 | 776 Rpl7a   |
| ENSMUSG00000067995 | 777 Gtf2f2  |
| ENSMUSG00000071650 | 778 Ganab   |
| ENSMUSG00000024393 | 779 Prrc2a  |
| ENSMUSG00000039828 | 780 Wdr70   |
| ENSMUSG00000000563 | 781 Atp5f1  |
| ENSMUSG00000015092 | 782 Edf1    |
| ENSMUSG00000095567 | 783 Noc2l   |
| ENSMUSG00000038650 | 784 Rnh1    |
| ENSMUSG00000052997 | 785 Uba2    |
| ENSMUSG00000038462 | 786 Uqcrfs1 |
| ENSMUSG00000028412 | 787 Slc44a1 |
| ENSMUSG00000024335 | 788 Brd2    |
| ENSMUSG00000001774 | 789 Chordc1 |
| ENSMUSG00000023942 | 790 Slc29a1 |
| ENSMUSG00000091955 | 791 Gm9844  |
| ENSMUSG00000000001 | 792 Gnai3   |
| ENSMUSG00000028291 | 793 Akirin2 |
| ENSMUSG00000031029 | 794 Eif3f   |
| ENSMUSG00000031519 | 795 Asb5    |
| ENSMUSG00000041891 | 796 Lman1   |

|                    |                   |
|--------------------|-------------------|
| ENSMUSG00000040998 | 797 Npnt          |
| ENSMUSG00000027803 | 798 Wwtr1         |
| ENSMUSG00000030615 | 799 Tmem126a      |
| ENSMUSG00000022043 | 800 Trim35        |
| ENSMUSG00000026456 | 801 Cyb5r1        |
| ENSMUSG00000015759 | 802 Cnih1         |
| ENSMUSG00000037656 | 803 Slc20a2       |
| ENSMUSG00000017428 | 804 Psmc11        |
| ENSMUSG00000052397 | 805 Ezr           |
| ENSMUSG00000061950 | 806 Ppp4r1        |
| ENSMUSG00000022533 | 807 Atp13a3       |
| ENSMUSG00000021079 | 808 Timm9         |
| ENSMUSG00000027215 | 809 Cd82          |
| ENSMUSG00000025511 | 810 Tspan4        |
| ENSMUSG00000025016 | 811 Tm9sf3        |
| ENSMUSG00000009549 | 812 Srp14         |
| ENSMUSG00000030536 | 813 Iqgap1        |
| ENSMUSG00000071528 | 814 Usmg5         |
| ENSMUSG00000052825 | 815 Gm9892        |
| ENSMUSG00000029465 | 816 Arpc3         |
| ENSMUSG00000022450 | 817 Ndufa6        |
| ENSMUSG00000028494 | 818 Plin2         |
| ENSMUSG00000030978 | 819 Rrm1          |
| ENSMUSG00000000346 | 820 Dazap2        |
| ENSMUSG00000028811 | 821 Yars          |
| ENSMUSG00000025423 | 822 Pias2         |
| ENSMUSG00000038005 | 823 2700029M09Rik |
| ENSMUSG00000016257 | 824 Slmo2         |
| ENSMUSG00000007867 | 825 Ift43         |
| ENSMUSG00000022797 | 826 Tfrc          |
| ENSMUSG00000022770 | 827 Dlg1          |
| ENSMUSG00000071014 | 828 Ndffb6        |
| ENSMUSG00000052139 | 829 Bre           |
| ENSMUSG00000074141 | 830 Il4i1         |
| ENSMUSG00000021910 | 831 Nisch         |
| ENSMUSG00000031246 | 832 Sh3bgrl       |
| ENSMUSG00000028010 | 833 Gar1          |
| ENSMUSG00000020706 | 834 Ftsj3         |
| ENSMUSG00000021595 | 835 Nsun2         |
| ENSMUSG00000016554 | 836 Eif3d         |
| ENSMUSG00000008668 | 837 Rps18         |
| ENSMUSG00000032511 | 838 Scn5a         |

|                    |              |
|--------------------|--------------|
| ENSMUSG00000019848 | 839 Popdc3   |
| ENSMUSG00000069833 | 840 Ahnak    |
| ENSMUSG00000021243 | 841 Fcf1     |
| ENSMUSG00000028433 | 842 Ubap2    |
| ENSMUSG00000022013 | 843 Dnajc15  |
| ENSMUSG00000032481 | 844 Smarcc1  |
| ENSMUSG00000015656 | 845 Hspa8    |
| ENSMUSG00000031960 | 846 Aars     |
| ENSMUSG00000025544 | 847 Tm9sf2   |
| ENSMUSG00000025856 | 848 Pdgfa    |
| ENSMUSG00000017466 | 849 Timp2    |
| ENSMUSG00000040725 | 850 Hnrnpul1 |
| ENSMUSG00000019920 | 851 Lims1    |
| ENSMUSG00000007888 | 852 Crlf1    |
| ENSMUSG00000028163 | 853 Nfkb1    |
| ENSMUSG00000028034 | 854 Fubp1    |
| ENSMUSG00000060579 | 855 Fhit     |
| ENSMUSG00000098234 | 856 Snhg6    |
| ENSMUSG00000037876 | 857 Jmjd1c   |
| ENSMUSG00000035325 | 858 Sec31a   |
| ENSMUSG00000032350 | 859 Gclc     |
| ENSMUSG00000038722 | 860 Bud31    |
| ENSMUSG00000019370 | 861 Calm3    |
| ENSMUSG00000029657 | 862 Hsph1    |
| ENSMUSG00000022255 | 863 Mtdh     |
| ENSMUSG00000063275 | 864 Hacd1    |
| ENSMUSG00000079562 | 865 Maea     |
| ENSMUSG00000029730 | 866 Mcm7     |
| ENSMUSG00000028869 | 867 Gnl2     |
| ENSMUSG00000019132 | 868 BC005537 |
| ENSMUSG00000042712 | 869 Wbp5     |
| ENSMUSG00000054312 | 870 Mrps21   |
| ENSMUSG00000025651 | 871 Uqcrc1   |
| ENSMUSG00000025171 | 872 Ubtd1    |
| ENSMUSG00000047407 | 873 Tgif1    |
| ENSMUSG00000029622 | 874 Arpc1b   |
| ENSMUSG00000037487 | 875 Ubr5     |
| ENSMUSG00000016382 | 876 Pls3     |
| ENSMUSG00000021048 | 877 Mthfd1   |
| ENSMUSG00000032228 | 878 Tcf12    |
| ENSMUSG00000028249 | 879 Sdcbp    |
| ENSMUSG00000101136 | 880 Gm8739   |

|                    |             |
|--------------------|-------------|
| ENSMUSG00000040354 | 881 Mars    |
| ENSMUSG00000046330 | 882 Rpl37a  |
| ENSMUSG00000039153 | 883 Runx2   |
| ENSMUSG00000038762 | 884 Abcf1   |
| ENSMUSG00000026193 | 885 Fn1     |
| ENSMUSG00000005881 | 886 Ergic3  |
| ENSMUSG00000035726 | 887 Supt16  |
| ENSMUSG00000007029 | 888 Vars    |
| ENSMUSG00000004849 | 889 Ap1s1   |
| ENSMUSG00000043091 | 890 Tuba1c  |
| ENSMUSG00000030718 | 891 Ppme1   |
| ENSMUSG00000020594 | 892 Pum2    |
| ENSMUSG00000058835 | 893 Abi1    |
| ENSMUSG00000037965 | 894 Zc3h7a  |
| ENSMUSG00000019471 | 895 Cdc37   |
| ENSMUSG00000058569 | 896 Tmed9   |
| ENSMUSG00000018042 | 897 Cyb5r3  |
| ENSMUSG00000059263 | 898 Usp47   |
| ENSMUSG00000021606 | 899 Ndufs6  |
| ENSMUSG00000005514 | 900 Por     |
| ENSMUSG00000020530 | 901 Ggnbp2  |
| ENSMUSG00000031939 | 902 Taf1d   |
| ENSMUSG00000029036 | 903 Atad3a  |
| ENSMUSG00000022119 | 904 Rbm26   |
| ENSMUSG00000020088 | 905 Sar1a   |
| ENSMUSG00000032458 | 906 Copb2   |
| ENSMUSG00000029860 | 907 Zyx     |
| ENSMUSG00000037331 | 908 Larp1   |
| ENSMUSG00000054405 | 909 Dnajc8  |
| ENSMUSG00000022337 | 910 Emc2    |
| ENSMUSG00000061477 | 911 Rps7    |
| ENSMUSG00000037916 | 912 Ndufv1  |
| ENSMUSG00000017221 | 913 Psmc3   |
| ENSMUSG00000027680 | 914 Fxr1    |
| ENSMUSG00000039530 | 915 Tusc3   |
| ENSMUSG00000019054 | 916 Fis1    |
| ENSMUSG00000020290 | 917 Xpo1    |
| ENSMUSG00000062929 | 918 Cfl2    |
| ENSMUSG00000035202 | 919 Lars2   |
| ENSMUSG00000025261 | 920 Huwe1   |
| ENSMUSG00000009470 | 921 Tnpo1   |
| ENSMUSG00000058064 | 922 Gm10036 |

|                    |              |
|--------------------|--------------|
| ENSMUSG00000034160 | 923 Ogt      |
| ENSMUSG00000026385 | 924 Dbi      |
| ENSMUSG00000032435 | 925 Dync1li1 |
| ENSMUSG00000025582 | 926 Nptx1    |
| ENSMUSG00000027206 | 927 Cops2    |
| ENSMUSG00000029063 | 928 Nadk     |
| ENSMUSG00000014496 | 929 Ankrd28  |
| ENSMUSG00000000568 | 930 Hnrnpd   |
| ENSMUSG00000052456 | 931 Asna1    |
| ENSMUSG00000062070 | 932 Pgk1     |
| ENSMUSG00000022565 | 933 Plec     |
| ENSMUSG00000024208 | 934 Uqcc2    |
| ENSMUSG00000059436 | 935 Max      |
| ENSMUSG00000018363 | 936 Smurf2   |
| ENSMUSG00000029781 | 937 Fkbp9    |
| ENSMUSG00000044716 | 938 Dok7     |
| ENSMUSG00000022710 | 939 Usp7     |
| ENSMUSG00000002748 | 940 Baz1b    |
| ENSMUSG00000032745 | 941 Gppp1    |
| ENSMUSG00000009575 | 942 Cbx5     |
| ENSMUSG00000002265 | 943 Peg3     |
| ENSMUSG00000021764 | 944 Ndufs4   |
| ENSMUSG00000031696 | 945 Vps35    |
| ENSMUSG00000032802 | 946 Srxn1    |
| ENSMUSG00000028149 | 947 Rap1gds1 |
| ENSMUSG00000010755 | 948 Cars     |
| ENSMUSG00000039680 | 949 Mrps6    |
| ENSMUSG00000027422 | 950 Rrbp1    |
| ENSMUSG00000032187 | 951 Smarca4  |
| ENSMUSG00000041571 | 952 Sepw1    |
| ENSMUSG00000029234 | 953 Tmem165  |
| ENSMUSG00000028577 | 954 Plaa     |
| ENSMUSG00000040249 | 955 Lrp1     |
| ENSMUSG00000029528 | 956 Pxn      |
| ENSMUSG00000028798 | 957 Eif3i    |
| ENSMUSG00000098534 | 958 Gm27167  |
| ENSMUSG00000020326 | 959 Ccng1    |
| ENSMUSG00000019814 | 960 Ltv1     |
| ENSMUSG00000030127 | 961 Cops7a   |
| ENSMUSG00000044408 | 962 Sptssa   |
| ENSMUSG00000036990 | 963 Otud4    |
| ENSMUSG00000043962 | 964 Thrap3   |

|                    |                |
|--------------------|----------------|
| ENSMUSG00000032324 | 965 Tspan3     |
| ENSMUSG00000030704 | 966 Rab6a      |
| ENSMUSG00000010461 | 967 Eya4       |
| ENSMUSG00000014859 | 968 E2f4       |
| ENSMUSG00000021116 | 969 Eif2s1     |
| ENSMUSG00000041859 | 970 Mcm3       |
| ENSMUSG00000026895 | 971 Ndufa8     |
| ENSMUSG00000024286 | 972 Ccny       |
| ENSMUSG00000005198 | 973 Polr2a     |
| ENSMUSG00000020496 | 974 Rnf187     |
| ENSMUSG00000024527 | 975 Afg3l2     |
| ENSMUSG00000005354 | 976 Txn2       |
| ENSMUSG00000032939 | 977 Nup93      |
| ENSMUSG00000037058 | 978 Paip2      |
| ENSMUSG00000024120 | 979 Lrpprc     |
| ENSMUSG00000022961 | 980 Son        |
| ENSMUSG00000054364 | 981 Rhob       |
| ENSMUSG00000030876 | 982 Mettl9     |
| ENSMUSG00000026355 | 983 Mcm6       |
| ENSMUSG00000057315 | 984 Arhgap24   |
| ENSMUSG00000041360 | 985 Pum3       |
| ENSMUSG00000003810 | 986 Mast2      |
| ENSMUSG00000032959 | 987 Pebp1      |
| ENSMUSG00000020074 | 988 Ccar1      |
| ENSMUSG00000017817 | 989 Jph2       |
| ENSMUSG00000022557 | 990 Bop1       |
| ENSMUSG00000028757 | 991 Ddost      |
| ENSMUSG00000021665 | 992 Hexb       |
| ENSMUSG00000016018 | 993 Skiv2l2    |
| ENSMUSG00000062203 | 994 Gspt1      |
| ENSMUSG00000031065 | 995 Cdk16      |
| ENSMUSG00000026021 | 996 Sumo1      |
| ENSMUSG00000035478 | 997 Mbd3       |
| ENSMUSG00000004099 | 998 Dnmt1      |
| ENSMUSG00000046434 | 999 Hnrnpa1    |
| ENSMUSG00000063884 | 1000 Ptc3      |
| ENSMUSG00000025410 | 1001 Dctn2     |
| ENSMUSG00000070697 | 1002 Utp3      |
| ENSMUSG00000020153 | 1003 Ndufs7    |
| ENSMUSG00000025939 | 1004 Ube2w     |
| ENSMUSG00000020739 | 1005 Nup85     |
| ENSMUSG00000101188 | 1006 Eif4a-ps4 |



|                     |              |
|---------------------|--------------|
| ENSMUSG00000028902  | 1007 Sf3a3   |
| ENSMUSG00000022789  | 1008 Dnm1l   |
| ENSMUSG00000001380  | 1009 Hars    |
| ENSMUSG00000020386  | 1010 Sar1b   |
| ENSMUSG00000038244  | 1011 Mical2  |
| ENSMUSG00000022391  | 1012 Rangap1 |
| ENSMUSG00000024271  | 1013 Elp2    |
| ENSMUSG000000101640 | 1014 Gm28376 |
| ENSMUSG00000001847  | 1015 Rac1    |
| ENSMUSG00000001017  | 1016 Chtop   |
| ENSMUSG00000054612  | 1017 Mgmt    |
| ENSMUSG00000021156  | 1018 Zmynd11 |
| ENSMUSG00000017774  | 1019 Myo1c   |
| ENSMUSG00000026434  | 1020 Nucks1  |
| ENSMUSG00000029642  | 1021 Polr1d  |
| ENSMUSG00000057280  | 1022 Musk    |
| ENSMUSG00000027455  | 1023 Nsf1c   |
| ENSMUSG00000009291  | 1024 Pttg1ip |
| ENSMUSG00000031253  | 1025 SrpX2   |
| ENSMUSG00000073639  | 1026 Rab18   |
| ENSMUSG00000063895  | 1027 Nupl1   |
| ENSMUSG00000037029  | 1028 Zfp146  |
| ENSMUSG00000014959  | 1029 Gorasp2 |
| ENSMUSG00000032178  | 1030 Ilf3    |
| ENSMUSG00000002658  | 1031 Gtf2f1  |
| ENSMUSG00000074088  | 1032 Snrnp40 |
| ENSMUSG00000031848  | 1033 Lsm4    |
| ENSMUSG00000026335  | 1034 Pam     |
| ENSMUSG00000015733  | 1035 Capza2  |
| ENSMUSG00000013662  | 1036 Atad1   |
| ENSMUSG00000032220  | 1037 Myo1e   |
| ENSMUSG00000039233  | 1038 Tbce    |
| ENSMUSG00000025162  | 1039 Csnk1d  |
| ENSMUSG00000042729  | 1040 Wdr74   |
| ENSMUSG00000017776  | 1041 Crk     |
| ENSMUSG00000040511  | 1042 Pvr     |
| ENSMUSG00000060992  | 1043 Copz1   |
| ENSMUSG00000024590  | 1044 Lmnb1   |
| ENSMUSG00000095280  | 1045 Gm21738 |
| ENSMUSG00000000420  | 1046 Galnt1  |
| ENSMUSG00000024213  | 1047 Nudt3   |
| ENSMUSG00000032497  | 1048 Lrrfip2 |

|                    |                 |
|--------------------|-----------------|
| ENSMUSG00000031955 | 1049 Bcar1      |
| ENSMUSG00000037361 | 1050 Sf3b6      |
| ENSMUSG00000034648 | 1051 Lrrn1      |
| ENSMUSG00000022607 | 1052 Ptk2       |
| ENSMUSG00000024664 | 1053 Fads3      |
| ENSMUSG00000032249 | 1054 Anp32a     |
| ENSMUSG00000004264 | 1055 Phb2       |
| ENSMUSG00000022438 | 1056 Parvb      |
| ENSMUSG00000029338 | 1057 Antxr2     |
| ENSMUSG00000019173 | 1058 Rab5c      |
| ENSMUSG00000058317 | 1059 Ube2e2     |
| ENSMUSG00000079641 | 1060 Rpl39      |
| ENSMUSG00000036323 | 1061 Srp72      |
| ENSMUSG00000059796 | 1062 Eif4a1     |
| ENSMUSG00000036112 | 1063 Metap2     |
| ENSMUSG00000042747 | 1064 Krtcap2    |
| ENSMUSG00000024593 | 1065 Megf10     |
| ENSMUSG00000005410 | 1066 Mcm5       |
| ENSMUSG00000022110 | 1067 Sucla2     |
| ENSMUSG00000097625 | 1068 Gm26561    |
| ENSMUSG00000050856 | 1069 Atp5k      |
| ENSMUSG00000045817 | 1070 Zfp36l2    |
| ENSMUSG00000020132 | 1071 Rab21      |
| ENSMUSG00000046032 | 1072 Snx12      |
| ENSMUSG00000063358 | 1073 Mapk1      |
| ENSMUSG00000008036 | 1074 Ap2s1      |
| ENSMUSG00000054766 | 1075 Set        |
| ENSMUSG00000021096 | 1076 Ppm1a      |
| ENSMUSG00000057738 | 1077 Sptan1     |
| ENSMUSG00000025510 | 1078 Cd151      |
| ENSMUSG00000030654 | 1079 Arl6ip1    |
| ENSMUSG00000005625 | 1080 Psm4       |
| ENSMUSG00000034667 | 1081 Xpot       |
| ENSMUSG00000042705 | 1082 Commd10    |
| ENSMUSG00000052298 | 1083 Cdc42se2   |
| ENSMUSG00000030616 | 1084 Sytl2      |
| ENSMUSG00000037712 | 1085 Fermt2     |
| ENSMUSG00000041763 | 1086 Tpp2       |
| ENSMUSG00000007411 | 1087 Mark3      |
| ENSMUSG00000083757 | 1088 Rps15a-ps4 |
| ENSMUSG00000025995 | 1089 Wdr75      |
| ENSMUSG00000001576 | 1090 Ergic1     |

|                    |                |
|--------------------|----------------|
| ENSMUSG00000022300 | 1091 Dcaf13    |
| ENSMUSG00000034269 | 1092 Setd5     |
| ENSMUSG00000028277 | 1093 Ube2j1    |
| ENSMUSG00000040952 | 1094 Rps19     |
| ENSMUSG00000022111 | 1095 Uchl3     |
| ENSMUSG00000087085 | 1096 Gm12068   |
| ENSMUSG00000036693 | 1097 Nop14     |
| ENSMUSG00000075700 | 1098 Selt      |
| ENSMUSG00000029407 | 1099 Uso1      |
| ENSMUSG00000026377 | 1100 Nifk      |
| ENSMUSG00000028580 | 1101 Pum1      |
| ENSMUSG00000018583 | 1102 G3bp1     |
| ENSMUSG00000030298 | 1103 Sec13     |
| ENSMUSG00000030754 | 1104 Copb1     |
| ENSMUSG00000022114 | 1105 Spry2     |
| ENSMUSG00000029344 | 1106 Tpst2     |
| ENSMUSG00000028234 | 1107 Rps20     |
| ENSMUSG00000034220 | 1108 Gpc1      |
| ENSMUSG00000030835 | 1109 Nomo1     |
| ENSMUSG00000019943 | 1110 Atp2b1    |
| ENSMUSG00000025007 | 1111 Aldh18a1  |
| ENSMUSG00000024908 | 1112 Ppp6r3    |
| ENSMUSG00000054452 | 1113 Aes       |
| ENSMUSG00000022404 | 1114 Slc25a17  |
| ENSMUSG00000050017 | 1115 Pitpnb    |
| ENSMUSG00000029110 | 1116 Rnf4      |
| ENSMUSG00000024357 | 1117 Sil1      |
| ENSMUSG00000024997 | 1118 Prdx3     |
| ENSMUSG00000032803 | 1119 Cdv3      |
| ENSMUSG00000019977 | 1120 Hbs1l     |
| ENSMUSG00000030521 | 1121 Mphosph10 |
| ENSMUSG00000071037 | 1122 Camkmt    |
| ENSMUSG00000020608 | 1123 Smc6      |
| ENSMUSG00000004530 | 1124 Coro1c    |
| ENSMUSG00000032336 | 1125 Nptn      |
| ENSMUSG00000057236 | 1126 Rbbp4     |
| ENSMUSG00000001020 | 1127 S100a4    |
| ENSMUSG00000010406 | 1128 Mrpl52    |
| ENSMUSG00000032348 | 1129 Gsta4     |
| ENSMUSG00000005973 | 1130 Rcn1      |
| ENSMUSG00000024248 | 1131 Cox7a2l   |
| ENSMUSG00000021958 | 1132 Pinx1     |

|                     |               |
|---------------------|---------------|
| ENSMUSG00000028729  | 1133 Ebna1bp2 |
| ENSMUSG00000047843  | 1134 Bri3     |
| ENSMUSG00000020780  | 1135 Srp68    |
| ENSMUSG00000023089  | 1136 Ndufa5   |
| ENSMUSG00000038612  | 1137 Mcl1     |
| ENSMUSG00000028797  | 1138 Tmem234  |
| ENSMUSG00000024392  | 1139 Bag6     |
| ENSMUSG00000028741  | 1140 Mrto4    |
| ENSMUSG00000091243  | 1141 Vgll3    |
| ENSMUSG00000040152  | 1142 Thbs1    |
| ENSMUSG00000038366  | 1143 Lasp1    |
| ENSMUSG00000021420  | 1144 Fars2    |
| ENSMUSG00000004100  | 1145 Ppan     |
| ENSMUSG00000030505  | 1146 Prmt3    |
| ENSMUSG00000020076  | 1147 Ddx50    |
| ENSMUSG00000019907  | 1148 Ppp1r12a |
| ENSMUSG00000028347  | 1149 Tmeff1   |
| ENSMUSG00000026750  | 1150 Psmb7    |
| ENSMUSG00000022201  | 1151 Zfr      |
| ENSMUSG00000025666  | 1152 Tmem47   |
| ENSMUSG00000028465  | 1153 Tln1     |
| ENSMUSG00000037805  | 1154 Rpl10a   |
| ENSMUSG00000030062  | 1155 Rpn1     |
| ENSMUSG00000038546  | 1156 Ranbp9   |
| ENSMUSG00000025404  | 1157 R3hdm2   |
| ENSMUSG00000039191  | 1158 Rbpj     |
| ENSMUSG00000033499  | 1159 Larp4b   |
| ENSMUSG00000026103  | 1160 Glis     |
| ENSMUSG00000025035  | 1161 Arl3     |
| ENSMUSG00000028409  | 1162 Smu1     |
| ENSMUSG00000018567  | 1163 Gabarap  |
| ENSMUSG000000108414 | 1164 Snhg1    |
| ENSMUSG00000025785  | 1165 Exosc7   |
| ENSMUSG00000028790  | 1166 Khdrbs1  |
| ENSMUSG00000032096  | 1167 Arcn1    |
| ENSMUSG00000030410  | 1168 Dmwd     |
| ENSMUSG00000024841  | 1169 Eif1ad   |
| ENSMUSG00000006673  | 1170 Qrich1   |
| ENSMUSG00000005161  | 1171 Prdx2    |
| ENSMUSG00000025287  | 1172 Acot9    |
| ENSMUSG00000066705  | 1173 Fxyd6    |
| ENSMUSG00000056394  | 1174 Lig1     |

|                     |                    |
|---------------------|--------------------|
| ENSMUSG00000059901  | 1175 Adamts14      |
| ENSMUSG00000027293  | 1176 Ehd4          |
| ENSMUSG00000022556  | 1177 Hsf1          |
| ENSMUSG00000028677  | 1178 Rnf220        |
| ENSMUSG00000019373  | 1179 Cops3         |
| ENSMUSG00000021144  | 1180 Mta1          |
| ENSMUSG00000021585  | 1181 Cast          |
| ENSMUSG00000027447  | 1182 Cst3          |
| ENSMUSG00000000384  | 1183 Tbrg4         |
| ENSMUSG000000006315 | 1184 Tmem147       |
| ENSMUSG00000026032  | 1185 Ndufb3        |
| ENSMUSG00000021748  | 1186 Pdhb          |
| ENSMUSG000000003549 | 1187 Ercc1         |
| ENSMUSG00000040048  | 1188 Ndufb10       |
| ENSMUSG00000042079  | 1189 Hnrnpf        |
| ENSMUSG000000031137 | 1190 Fgf13         |
| ENSMUSG000000003435 | 1191 Supt5         |
| ENSMUSG00000017707  | 1192 Serinc3       |
| ENSMUSG000000044783 | 1193 Hjurp         |
| ENSMUSG00000007721  | 1194 Ccdc124       |
| ENSMUSG000000032547 | 1195 Ryk           |
| ENSMUSG000000024045 | 1196 Akap8         |
| ENSMUSG000000032555 | 1197 Topbp1        |
| ENSMUSG00000017999  | 1198 Ddx27         |
| ENSMUSG000000029048 | 1199 Rer1          |
| ENSMUSG000000021709 | 1200 Erbb2ip       |
| ENSMUSG000000030849 | 1201 Fgfr2         |
| ENSMUSG000000034252 | 1202 Senp6         |
| ENSMUSG000000029623 | 1203 Pdap1         |
| ENSMUSG000000021890 | 1204 Eaf1          |
| ENSMUSG000000031197 | 1205 Vbp1          |
| ENSMUSG000000063458 | 1206 1700112E06Rik |
| ENSMUSG000000021453 | 1207 Gadd45g       |
| ENSMUSG000000029762 | 1208 Akr1b8        |
| ENSMUSG000000021807 | 1209 2700060E02Rik |
| ENSMUSG000000048058 | 1210 Ldlrad3       |
| ENSMUSG000000000355 | 1211 Mcts1         |
| ENSMUSG000000023495 | 1212 Pcbp4         |
| ENSMUSG000000097415 | 1213 AU020206      |
| ENSMUSG000000015937 | 1214 H2afy         |
| ENSMUSG000000060019 | 1215 Gm10073       |
| ENSMUSG000000058056 | 1216 Palld         |

|                    |              |
|--------------------|--------------|
| ENSMUSG00000079677 | 1217 Fdx1l   |
| ENSMUSG00000032504 | 1218 Pcd6ip  |
| ENSMUSG00000081534 | 1219 Slc48a1 |
| ENSMUSG00000071662 | 1220 Polr2g  |
| ENSMUSG00000029735 | 1221 Tpk1    |
| ENSMUSG00000031565 | 1222 Fgfr1   |
| ENSMUSG00000004460 | 1223 Dnajb11 |
| ENSMUSG00000024785 | 1224 Rcl1    |
| ENSMUSG00000021102 | 1225 Glrx5   |
| ENSMUSG00000078427 | 1226 Sarnp   |
| ENSMUSG00000074305 | 1227 Peak1   |
| ENSMUSG00000019843 | 1228 Fyn     |
| ENSMUSG00000022992 | 1229 Kansl2  |
| ENSMUSG00000021374 | 1230 Nup153  |
| ENSMUSG00000042167 | 1231 Papd4   |
| ENSMUSG00000021816 | 1232 Ppp3cb  |
| ENSMUSG00000024767 | 1233 Otub1   |
| ENSMUSG00000032116 | 1234 Stt3a   |
| ENSMUSG00000022673 | 1235 Mcm4    |
| ENSMUSG00000059734 | 1236 Ndufs8  |
| ENSMUSG00000028559 | 1237 Osbp19  |
| ENSMUSG00000014867 | 1238 Surf4   |
| ENSMUSG00000043131 | 1239 Mob1a   |
| ENSMUSG00000057406 | 1240 Whsc1   |
| ENSMUSG00000039286 | 1241 Fndc3b  |
| ENSMUSG00000040151 | 1242 Hs2st1  |
| ENSMUSG00000022052 | 1243 Ppp2r2a |
| ENSMUSG00000021242 | 1244 Npc2    |
| ENSMUSG00000022329 | 1245 Stk3    |
| ENSMUSG00000027722 | 1246 Spata5  |
| ENSMUSG00000020427 | 1247 Igfbp3  |
| ENSMUSG00000031839 | 1248 Hsbp1   |
| ENSMUSG00000022261 | 1249 Sdc2    |
| ENSMUSG00000020307 | 1250 Cdc34   |
| ENSMUSG00000029538 | 1251 Srsf9   |
| ENSMUSG00000032374 | 1252 Plod2   |
| ENSMUSG00000062014 | 1253 Gmfb    |
| ENSMUSG00000006445 | 1254 Epha2   |
| ENSMUSG00000033335 | 1255 Dnm2    |
| ENSMUSG00000025487 | 1256 Psm13   |
| ENSMUSG00000079658 | 1257 Tceb1   |
| ENSMUSG00000003438 | 1258 Timm50  |

|                    |                 |
|--------------------|-----------------|
| ENSMUSG00000021103 | 1259 Mnat1      |
| ENSMUSG00000046573 | 1260 Lyrn4      |
| ENSMUSG00000027804 | 1261 Ppid       |
| ENSMUSG00000048578 | 1262 Mlec       |
| ENSMUSG00000020163 | 1263 Uqcr11     |
| ENSMUSG00000024974 | 1264 Smc3       |
| ENSMUSG00000071659 | 1265 Hnrnpul2   |
| ENSMUSG00000037266 | 1266 Rsrp1      |
| ENSMUSG00000020803 | 1267 Txndc17    |
| ENSMUSG00000003948 | 1268 Mmd        |
| ENSMUSG00000067150 | 1269 Xpo5       |
| ENSMUSG00000037458 | 1270 Azin1      |
| ENSMUSG00000024843 | 1271 Chka       |
| ENSMUSG00000030138 | 1272 Bms1       |
| ENSMUSG00000005204 | 1273 Senp3      |
| ENSMUSG00000019942 | 1274 Cdk1       |
| ENSMUSG00000063931 | 1275 Pepd       |
| ENSMUSG00000038372 | 1276 Gmds       |
| ENSMUSG00000030805 | 1277 Stx4a      |
| ENSMUSG00000037465 | 1278 Klf10      |
| ENSMUSG00000040322 | 1279 Slc25a24   |
| ENSMUSG00000027133 | 1280 Nop10      |
| ENSMUSG00000059586 | 1281 Nsmce2     |
| ENSMUSG00000034765 | 1282 Dusp5      |
| ENSMUSG00000076441 | 1283 Ass1       |
| ENSMUSG00000033916 | 1284 Chmp2a     |
| ENSMUSG00000041736 | 1285 Tspo       |
| ENSMUSG00000026775 | 1286 Yme1l1     |
| ENSMUSG00000061458 | 1287 Nol10      |
| ENSMUSG00000014402 | 1288 Tsg101     |
| ENSMUSG00000087366 | 1289 Junos      |
| ENSMUSG00000040466 | 1290 Blvrb      |
| ENSMUSG00000091697 | 1291 Eif3s6-ps2 |
| ENSMUSG00000021266 | 1292 Wars       |
| ENSMUSG00000030619 | 1293 Eed        |
| ENSMUSG00000074886 | 1294 Grk6       |
| ENSMUSG00000023110 | 1295 Prmt5      |
| ENSMUSG00000024983 | 1296 Vti1a      |
| ENSMUSG00000040667 | 1297 Nup88      |
| ENSMUSG00000068749 | 1298 Psma5      |
| ENSMUSG00000036777 | 1299 Anln       |
| ENSMUSG00000002010 | 1300 Idh3g      |

|                      |                    |
|----------------------|--------------------|
| ENSMUSG00000050812   | 1301 Al314180      |
| ENSMUSG00000005510   | 1302 Ndufs3        |
| ENSMUSG00000002233   | 1303 Rhoc          |
| ENSMUSG000000056305  | 1304 Usp39         |
| ENSMUSG000000053317  | 1305 Sec61b        |
| ENSMUSG000000050912  | 1306 Tmem123       |
| ENSMUSG000000028676  | 1307 Srsf10        |
| ENSMUSG00000002870   | 1308 Mcm2          |
| ENSMUSG000000041801  | 1309 Phlda3        |
| ENSMUSG000000038416  | 1310 Cdc16         |
| ENSMUSG000000039952  | 1311 Dag1          |
| ENSMUSG000000007815  | 1312 Rhoa          |
| ENSMUSG000000046711  | 1313 Hmga1         |
| ENSMUSG000000078249  | 1314 Hmga1-rs1     |
| ENSMUSG000000034484  | 1315 Snx2          |
| ENSMUSG000000044906  | 1316 4930503L19Rik |
| ENSMUSG000000027509  | 1317 Rae1          |
| ENSMUSG000000029994  | 1318 Anxa4         |
| ENSMUSG000000012535  | 1319 Tnpo3         |
| ENSMUSG000000034248  | 1320 Slc25a37      |
| ENSMUSG000000041740  | 1321 Rnf10         |
| ENSMUSG000000032582  | 1322 Rbm6          |
| ENSMUSG000000020219  | 1323 Timm13        |
| ENSMUSG000000004937  | 1324 Sgta          |
| ENSMUSG000000004535  | 1325 Tax1bp1       |
| ENSMUSG000000036390  | 1326 Gadd45a       |
| ENSMUSG000000019494  | 1327 Cops6         |
| ENSMUSG0000000055137 | 1328 Sugct         |
| ENSMUSG000000060429  | 1329 Sntb1         |
| ENSMUSG000000094870  | 1330 Zfp131        |
| ENSMUSG000000010517  | 1331 Faf1          |
| ENSMUSG000000027076  | 1332 Timm10        |
| ENSMUSG000000039126  | 1333 Prune2        |
| ENSMUSG000000071054  | 1334 Safb          |
| ENSMUSG000000061731  | 1335 Ext1          |
| ENSMUSG000000057531  | 1336 Dtnbp1        |
| ENSMUSG000000040850  | 1337 Psme4         |
| ENSMUSG000000058135  | 1338 Gstm1         |
| ENSMUSG000000085156  | 1339 Gm11974       |
| ENSMUSG000000025190  | 1340 Got1          |
| ENSMUSG000000060904  | 1341 Arl1          |
| ENSMUSG000000039682  | 1342 Lap3          |



|                     |               |
|---------------------|---------------|
| ENSMUSG00000032252  | 1343 Glce     |
| ENSMUSG00000003660  | 1344 Snrnp200 |
| ENSMUSG00000026134  | 1345 Prim2    |
| ENSMUSG000000046841 | 1346 Ckap4    |
| ENSMUSG00000003131  | 1347 Pafah1b2 |
| ENSMUSG00000037373  | 1348 Ctbp1    |
| ENSMUSG000000042133 | 1349 Ppig     |
| ENSMUSG00000034566  | 1350 Atp5h    |
| ENSMUSG00000031432  | 1351 Prps1    |
| ENSMUSG00000002984  | 1352 Tomm40   |
| ENSMUSG00000001864  | 1353 Aif1l    |
| ENSMUSG000000085885 | 1354 Gm11906  |
| ENSMUSG000000013846 | 1355 St3gal1  |
| ENSMUSG00000020456  | 1356 Ogdh     |
| ENSMUSG00000032328  | 1357 Tmem30a  |
| ENSMUSG000000024870 | 1358 Rab1b    |
| ENSMUSG00000035027  | 1359 Map2k2   |
| ENSMUSG00000063802  | 1360 Hsppb1   |
| ENSMUSG000000035105 | 1361 Egl3     |
| ENSMUSG00000020271  | 1362 Fbxw11   |
| ENSMUSG00000026478  | 1363 Lamc1    |
| ENSMUSG000000017485 | 1364 Top2b    |
| ENSMUSG00000033543  | 1365 Gtf2a2   |
| ENSMUSG00000047213  | 1366 Ythdf3   |
| ENSMUSG000000034271 | 1367 Jdp2     |
| ENSMUSG00000022858  | 1368 Tra2b    |
| ENSMUSG00000025917  | 1369 Cops5    |
| ENSMUSG00000028847  | 1370 Trappc3  |
| ENSMUSG00000004637  | 1371 Wwox     |
| ENSMUSG00000028179  | 1372 Cth      |
| ENSMUSG000000100168 | 1373 Gm28526  |
| ENSMUSG00000030421  | 1374 Uri1     |
| ENSMUSG00000031068  | 1375 Glrx3    |
| ENSMUSG00000062184  | 1376 Hs6st2   |
| ENSMUSG00000031176  | 1377 Dynlt3   |
| ENSMUSG00000024817  | 1378 Uhrf2    |
| ENSMUSG00000028861  | 1379 Mrps15   |
| ENSMUSG00000014956  | 1380 Ppp1cb   |
| ENSMUSG00000056050  | 1381 Mia3     |
| ENSMUSG00000022505  | 1382 Emp2     |
| ENSMUSG00000020097  | 1383 Sgpl1    |
| ENSMUSG00000021413  | 1384 Prpf4b   |

|                    |               |
|--------------------|---------------|
| ENSMUSG00000017781 | 1385 Pitpna   |
| ENSMUSG00000022774 | 1386 Ncbp2    |
| ENSMUSG00000029554 | 1387 Mad1l1   |
| ENSMUSG00000022452 | 1388 Smdt1    |
| ENSMUSG00000020929 | 1389 Eftud2   |
| ENSMUSG00000054428 | 1390 Atpif1   |
| ENSMUSG00000045624 | 1391 Esf1     |
| ENSMUSG00000053289 | 1392 Ddx10    |
| ENSMUSG00000053465 | 1393 Hs6st3   |
| ENSMUSG00000025869 | 1394 Nop16    |
| ENSMUSG00000038299 | 1395 Wdr36    |
| ENSMUSG00000034544 | 1396 Rsrc1    |
| ENSMUSG00000035765 | 1397 Dym      |
| ENSMUSG00000026219 | 1398 Trip12   |
| ENSMUSG00000086290 | 1399 Snhg12   |
| ENSMUSG00000021431 | 1400 Snrnp48  |
| ENSMUSG00000005262 | 1401 Ufd1l    |
| ENSMUSG00000008892 | 1402 Vdac3    |
| ENSMUSG00000019916 | 1403 P4ha1    |
| ENSMUSG00000021500 | 1404 Ddx46    |
| ENSMUSG00000021610 | 1405 Clptm1l  |
| ENSMUSG00000021939 | 1406 Ctsb     |
| ENSMUSG00000055109 | 1407 Gm15155  |
| ENSMUSG00000086567 | 1408 Gm2830   |
| ENSMUSG00000037148 | 1409 Arhgap10 |
| ENSMUSG00000025545 | 1410 Clybl    |
| ENSMUSG00000032621 | 1411 Srek1    |
| ENSMUSG00000031446 | 1412 Cul4a    |
| ENSMUSG00000051234 | 1413 Rnf7     |
| ENSMUSG00000020537 | 1414 Drg2     |
| ENSMUSG00000028657 | 1415 Ppt1     |
| ENSMUSG00000031808 | 1416 Slc27a1  |
| ENSMUSG00000036707 | 1417 Cab39    |
| ENSMUSG00000078956 | 1418 Gm14221  |
| ENSMUSG00000041506 | 1419 Rrp9     |
| ENSMUSG00000028932 | 1420 Psmc2    |
| ENSMUSG00000025060 | 1421 Slk      |
| ENSMUSG00000018585 | 1422 Atox1    |
| ENSMUSG00000020923 | 1423 Ubtf     |
| ENSMUSG00000054309 | 1424 Cpsf3    |
| ENSMUSG00000035934 | 1425 Pknox2   |
| ENSMUSG00000052572 | 1426 Dlg2     |

|                     |                    |
|---------------------|--------------------|
| ENSMUSG00000071646  | 1427 Mta2          |
| ENSMUSG00000027203  | 1428 Dut           |
| ENSMUSG00000060679  | 1429 Mrps9         |
| ENSMUSG00000028343  | 1430 Erp44         |
| ENSMUSG00000021929  | 1431 Kpna3         |
| ENSMUSG00000022247  | 1432 Brix1         |
| ENSMUSG00000022678  | 1433 Nde1          |
| ENSMUSG00000022507  | 1434 1810013L24Rik |
| ENSMUSG00000000168  | 1435 Dlat          |
| ENSMUSG000000031299 | 1436 Pdha1         |
| ENSMUSG00000028822  | 1437 Tmem50a       |
| ENSMUSG00000021576  | 1438 Pdc6          |
| ENSMUSG00000021193  | 1439 Pitrm1        |
| ENSMUSG00000027193  | 1440 Api5          |
| ENSMUSG00000019428  | 1441 Fkbp8         |
| ENSMUSG00000008475  | 1442 Arpc5         |
| ENSMUSG00000031796  | 1443 Cfap20        |
| ENSMUSG00000029050  | 1444 Ski           |
| ENSMUSG00000021619  | 1445 Atg10         |
| ENSMUSG00000003099  | 1446 Ppp5c         |
| ENSMUSG00000026020  | 1447 Nop58         |
| ENSMUSG000000055932 | 1448 Fto           |
| ENSMUSG00000026657  | 1449 Frmd4a        |
| ENSMUSG00000007458  | 1450 M6pr          |
| ENSMUSG000000003402 | 1451 Prkcsh        |
| ENSMUSG00000018666  | 1452 Cbx1          |
| ENSMUSG00000024556  | 1453 Me2           |
| ENSMUSG000000005506 | 1454 Celf1         |
| ENSMUSG00000023307  | 1455 42799         |
| ENSMUSG00000022307  | 1456 Oxr1          |
| ENSMUSG000000008604 | 1457 Ubqln4        |
| ENSMUSG00000021000  | 1458 Ctage5        |
| ENSMUSG00000027671  | 1459 Actl6a        |
| ENSMUSG00000026663  | 1460 Atf6          |
| ENSMUSG00000023027  | 1461 Atf1          |
| ENSMUSG000000005656 | 1462 Snx6          |
| ENSMUSG00000028423  | 1463 Nfx1          |
| ENSMUSG00000024829  | 1464 Mrpl21        |
| ENSMUSG00000024515  | 1465 Smad4         |
| ENSMUSG000000031924 | 1466 Cyb5b         |
| ENSMUSG00000027660  | 1467 Skil          |
| ENSMUSG00000012114  | 1468 Med15         |

|                     |                    |
|---------------------|--------------------|
| ENSMUSG00000006498  | 1469 Ptbp1         |
| ENSMUSG00000072235  | 1470 Tuba1a        |
| ENSMUSG00000021957  | 1471 Tkt           |
| ENSMUSG00000025337  | 1472 Sbds          |
| ENSMUSG00000021391  | 1473 Cenpp         |
| ENSMUSG00000033352  | 1474 Map2k4        |
| ENSMUSG00000028345  | 1475 Tex10         |
| ENSMUSG00000034321  | 1476 Exosc1        |
| ENSMUSG00000022956  | 1477 Atp5o         |
| ENSMUSG00000028945  | 1478 Rheb          |
| ENSMUSG00000028849  | 1479 Map7d1        |
| ENSMUSG00000024194  | 1480 Cuta          |
| ENSMUSG00000055204  | 1481 Ankrd17       |
| ENSMUSG00000025234  | 1482 Arih1         |
| ENSMUSG00000061136  | 1483 Prpf40a       |
| ENSMUSG00000037894  | 1484 H2afz         |
| ENSMUSG00000037286  | 1485 Stag1         |
| ENSMUSG00000035649  | 1486 Zcchc7        |
| ENSMUSG00000022378  | 1487 Fam49b        |
| ENSMUSG00000026254  | 1488 Eif4e2        |
| ENSMUSG00000026353  | 1489 Ubxn4         |
| ENSMUSG00000026674  | 1490 Ddr2          |
| ENSMUSG00000025260  | 1491 Hsd17b10      |
| ENSMUSG00000021264  | 1492 Yy1           |
| ENSMUSG000000101233 | 1493 Gm29242       |
| ENSMUSG00000079614  | 1494 Seh1l         |
| ENSMUSG00000004044  | 1495 Ptrf          |
| ENSMUSG00000001016  | 1496 Ilf2          |
| ENSMUSG00000019797  | 1497 1700021F05Rik |
| ENSMUSG00000020225  | 1498 Tmbim4        |
| ENSMUSG00000039640  | 1499 Mrpl12        |
| ENSMUSG00000048285  | 1500 Frmd6         |
| ENSMUSG00000051367  | 1501 Six1          |
| ENSMUSG00000063065  | 1502 Mapk3         |
| ENSMUSG00000036940  | 1503 Kdm1a         |
| ENSMUSG00000029319  | 1504 Coq2          |
| ENSMUSG00000027715  | 1505 Ccna2         |
| ENSMUSG00000046707  | 1506 Csnk2a2       |
| ENSMUSG00000041997  | 1507 Tlk1          |
| ENSMUSG00000021484  | 1508 Lman2         |
| ENSMUSG00000032115  | 1509 Hyou1         |
| ENSMUSG00000021938  | 1510 Pspc1         |

|                     |              |
|---------------------|--------------|
| ENSMUSG00000038510  | 1511 Rpf2    |
| ENSMUSG00000028248  | 1512 Pnlsr   |
| ENSMUSG00000029669  | 1513 Tspan12 |
| ENSMUSG00000005533  | 1514 Igf1r   |
| ENSMUSG00000031584  | 1515 Gsr     |
| ENSMUSG00000003848  | 1516 Nob1    |
| ENSMUSG000000031672 | 1517 Got2    |
| ENSMUSG00000022200  | 1518 Golph3  |
| ENSMUSG00000032097  | 1519 Ddx6    |
| ENSMUSG00000026603  | 1520 Smyd2   |
| ENSMUSG00000024002  | 1521 Brd4    |
| ENSMUSG00000067148  | 1522 Polr1c  |
| ENSMUSG00000063273  | 1523 Naa15   |
| ENSMUSG00000023460  | 1524 Rab12   |
| ENSMUSG00000104623  | 1525 Gm6394  |
| ENSMUSG00000031059  | 1526 Ndufb11 |
| ENSMUSG00000024258  | 1527 Polr2d  |
| ENSMUSG00000024007  | 1528 Ppil1   |
| ENSMUSG00000037236  | 1529 Matr3   |
| ENSMUSG00000028530  | 1530 Jak1    |
| ENSMUSG00000027412  | 1531 Lpin3   |
| ENSMUSG00000042348  | 1532 Arl15   |
| ENSMUSG00000025408  | 1533 Ddit3   |
| ENSMUSG00000096370  | 1534 Gm21992 |
| ENSMUSG00000005417  | 1535 Mprlp   |
| ENSMUSG00000028618  | 1536 Tmem59  |
| ENSMUSG00000010205  | 1537 Raver1  |
| ENSMUSG000000039168 | 1538 Dap     |
| ENSMUSG00000071317  | 1539 Bves    |
| ENSMUSG00000024639  | 1540 Gnaq    |
| ENSMUSG00000041459  | 1541 Tardbp  |
| ENSMUSG00000020863  | 1542 Luc7l3  |
| ENSMUSG00000022193  | 1543 Psmb5   |
| ENSMUSG00000061024  | 1544 Rrs1    |
| ENSMUSG00000044147  | 1545 Arf6    |
| ENSMUSG00000024537  | 1546 Psmg2   |
| ENSMUSG00000024660  | 1547 Incenp  |
| ENSMUSG00000006191  | 1548 Cdkal1  |
| ENSMUSG00000027367  | 1549 Stard7  |
| ENSMUSG00000064138  | 1550 Fam172a |
| ENSMUSG00000001158  | 1551 Snrnp27 |
| ENSMUSG00000034424  | 1552 Gcsh    |

|                    |              |
|--------------------|--------------|
| ENSMUSG00000026496 | 1553 Parp1   |
| ENSMUSG00000021759 | 1554 Ppap2a  |
| ENSMUSG00000026917 | 1555 Wdr5    |
| ENSMUSG00000028760 | 1556 Eif4g3  |
| ENSMUSG00000018707 | 1557 Dync1h1 |
| ENSMUSG00000023764 | 1558 Sfi1    |
| ENSMUSG00000022332 | 1559 Khdrbs3 |
| ENSMUSG00000046691 | 1560 Chtf8   |
| ENSMUSG00000030779 | 1561 Rbbp6   |
| ENSMUSG00000021520 | 1562 Uqcrb   |
| ENSMUSG00000025147 | 1563 Mob2    |
| ENSMUSG00000002372 | 1564 Ranbp3  |
| ENSMUSG00000020024 | 1565 Cep83   |
| ENSMUSG00000030697 | 1566 Ppp4c   |
| ENSMUSG00000020982 | 1567 Nemf    |
| ENSMUSG00000004317 | 1568 Clcn5   |
| ENSMUSG00000009013 | 1569 Dynll1  |
| ENSMUSG00000049866 | 1570 Arl4c   |
| ENSMUSG00000029701 | 1571 Rbm28   |
| ENSMUSG00000005698 | 1572 Ctcf    |
| ENSMUSG00000022024 | 1573 Sugt1   |
| ENSMUSG00000024312 | 1574 Wdr46   |
| ENSMUSG00000031751 | 1575 Amfr    |
| ENSMUSG00000035247 | 1576 Hectd1  |
| ENSMUSG00000040044 | 1577 Orc3    |
| ENSMUSG00000024309 | 1578 Pfdn6   |
| ENSMUSG00000104710 | 1579 Gm43603 |
| ENSMUSG00000031004 | 1580 Mki67   |
| ENSMUSG00000028134 | 1581 Ptbp2   |
| ENSMUSG00000038429 | 1582 Usp5    |
| ENSMUSG00000023235 | 1583 Ccl25   |
| ENSMUSG00000026784 | 1584 Pdss1   |
| ENSMUSG00000029203 | 1585 Ube2k   |
| ENSMUSG00000015755 | 1586 Tab2    |
| ENSMUSG00000029152 | 1587 Ociad1  |
| ENSMUSG00000078713 | 1588 Tomm5   |
| ENSMUSG00000022353 | 1589 Mtss1   |
| ENSMUSG00000035890 | 1590 Rnf126  |
| ENSMUSG00000030516 | 1591 Tjp1    |
| ENSMUSG00000025228 | 1592 Actr1a  |
| ENSMUSG00000060143 | 1593 Gm10076 |
| ENSMUSG00000031985 | 1594 Gnpat   |

|                     |                |
|---------------------|----------------|
| ENSMUSG00000024283  | 1595 Wac       |
| ENSMUSG00000003345  | 1596 Csnk1g2   |
| ENSMUSG00000024835  | 1597 Coro1b    |
| ENSMUSG000000031703 | 1598 Itfg1     |
| ENSMUSG000000036097 | 1599 Fam178a   |
| ENSMUSG000000030403 | 1600 Vasp      |
| ENSMUSG000000056692 | 1601 D17Wsu92e |
| ENSMUSG000000054408 | 1602 Spcs3     |
| ENSMUSG000000022682 | 1603 Rrn3      |
| ENSMUSG000000040663 | 1604 Clcf1     |
| ENSMUSG000000060843 | 1605 Ctnna3    |
| ENSMUSG000000004865 | 1606 Srpk1     |
| ENSMUSG000000029038 | 1607 Ssu72     |
| ENSMUSG000000020328 | 1608 Nudcd2    |
| ENSMUSG000000021065 | 1609 Fut8      |
| ENSMUSG000000016427 | 1610 Ndufa1    |
| ENSMUSG000000060261 | 1611 Gtf2i     |
| ENSMUSG000000039943 | 1612 Plcb4     |
| ENSMUSG000000032575 | 1613 Manf      |
| ENSMUSG000000085862 | 1614 Gm13483   |
| ENSMUSG000000001100 | 1615 Poldip2   |
| ENSMUSG000000022536 | 1616 Glyr1     |
| ENSMUSG000000022263 | 1617 Trio      |
| ENSMUSG000000024181 | 1618 Mrpl28    |
| ENSMUSG000000001761 | 1619 Smo       |
| ENSMUSG000000048264 | 1620 Dip2c     |
| ENSMUSG000000027162 | 1621 Lin7c     |
| ENSMUSG000000042541 | 1622 Shfm1     |
| ENSMUSG000000038264 | 1623 Sema7a    |
| ENSMUSG000000098302 | 1624 Gm28039   |
| ENSMUSG000000025583 | 1625 Rptor     |
| ENSMUSG000000036678 | 1626 Aaas      |
| ENSMUSG000000034932 | 1627 Mrpl54    |
| ENSMUSG000000001228 | 1628 Uhrf1     |
| ENSMUSG000000044949 | 1629 Ubtd2     |
| ENSMUSG000000009630 | 1630 Ppp2cb    |
| ENSMUSG000000049960 | 1631 Mrps16    |
| ENSMUSG000000061723 | 1632 Tnnt3     |
| ENSMUSG000000055320 | 1633 Tead1     |
| ENSMUSG000000042670 | 1634 Imp1l     |
| ENSMUSG000000019899 | 1635 Lama2     |
| ENSMUSG000000031996 | 1636 Aplp2     |

|                     |                    |
|---------------------|--------------------|
| ENSMUSG00000031918  | 1637 Mtmr2         |
| ENSMUSG00000019820  | 1638 Utrn          |
| ENSMUSG000000095115 | 1639 Itpripl2      |
| ENSMUSG000000022031 | 1640 Elp3          |
| ENSMUSG000000030678 | 1641 Maz           |
| ENSMUSG000000052684 | 1642 Jun           |
| ENSMUSG000000074578 | 1643 1500012F01Rik |
| ENSMUSG000000055737 | 1644 Ghr           |
| ENSMUSG000000030672 | 1645 Mylpf         |
| ENSMUSG000000008859 | 1646 Rala          |
| ENSMUSG000000056820 | 1647 Tsnax         |
| ENSMUSG000000020167 | 1648 Tcf3          |
| ENSMUSG000000024811 | 1649 Tnks2         |
| ENSMUSG000000023800 | 1650 Tiam2         |
| ENSMUSG000000026991 | 1651 Pkp4          |
| ENSMUSG000000057816 | 1652 1700007G11Rik |
| ENSMUSG000000038696 | 1653 Mapkap1       |
| ENSMUSG000000030846 | 1654 Tial1         |
| ENSMUSG000000007659 | 1655 Bcl2l1        |
| ENSMUSG000000027187 | 1656 Cat           |
| ENSMUSG000000032288 | 1657 Imp3          |
| ENSMUSG000000018287 | 1658 Spag7         |
| ENSMUSG000000006412 | 1659 Pfdn2         |
| ENSMUSG000000003360 | 1660 Ddx23         |
| ENSMUSG000000026457 | 1661 Adipor1       |
| ENSMUSG000000101621 | 1662 Gm28905       |
| ENSMUSG000000057863 | 1663 Rpl36         |
| ENSMUSG000000037503 | 1664 Fam168b       |
| ENSMUSG000000018565 | 1665 Elp5          |
| ENSMUSG000000020022 | 1666 Ndufa12       |
| ENSMUSG000000041645 | 1667 Ddx24         |
| ENSMUSG000000053038 | 1668 Gm6180        |
| ENSMUSG000000037960 | 1669 1110007C09Rik |
| ENSMUSG000000056209 | 1670 Npm3          |
| ENSMUSG000000096544 | 1671 Gm4617        |
| ENSMUSG000000012296 | 1672 Tjap1         |
| ENSMUSG000000028312 | 1673 Smc2          |
| ENSMUSG000000030216 | 1674 Wbp11         |
| ENSMUSG000000005371 | 1675 Fbxo11        |
| ENSMUSG000000038780 | 1676 Smurf1        |
| ENSMUSG000000028882 | 1677 Ppp1r8        |
| ENSMUSG000000084830 | 1678 Gm14539       |



|                    |                    |
|--------------------|--------------------|
| ENSMUSG00000018965 | 1679 Ywhah         |
| ENSMUSG00000008682 | 1680 Rpl10         |
| ENSMUSG00000024800 | 1681 Rpp30         |
| ENSMUSG00000024528 | 1682 Srfbp1        |
| ENSMUSG00000032393 | 1683 Dpp8          |
| ENSMUSG00000051579 | 1684 Tceal8        |
| ENSMUSG00000031835 | 1685 Mbtps1        |
| ENSMUSG00000058444 | 1686 Map2k5        |
| ENSMUSG00000030120 | 1687 Mlf2          |
| ENSMUSG00000085936 | 1688 2610307P16Rik |
| ENSMUSG00000051853 | 1689 Arf3          |
| ENSMUSG00000020321 | 1690 Mdh1          |
| ENSMUSG00000006941 | 1691 Eif1b         |
| ENSMUSG00000053819 | 1692 Camk2d        |
| ENSMUSG00000068798 | 1693 Rap1a         |
| ENSMUSG00000052798 | 1694 Nup107        |
| ENSMUSG00000044221 | 1695 Grsf1         |
| ENSMUSG00000049932 | 1696 H2afx         |
| ENSMUSG00000025586 | 1697 Cpeb1         |
| ENSMUSG00000019917 | 1698 Sept10        |
| ENSMUSG00000024613 | 1699 Tcof1         |
| ENSMUSG00000032902 | 1700 Slc16a1       |
| ENSMUSG00000029250 | 1701 Polr2b        |
| ENSMUSG00000020775 | 1702 Mrpl38        |
| ENSMUSG00000041548 | 1703 Hspb8         |
| ENSMUSG00000040549 | 1704 Ckap5         |
| ENSMUSG00000020917 | 1705 Acly          |
| ENSMUSG00000022812 | 1706 Gsk3b         |
| ENSMUSG00000074182 | 1707 Znhit6        |
| ENSMUSG00000059040 | 1708 Eno1b         |
| ENSMUSG00000028266 | 1709 Lmo4          |
| ENSMUSG00000004788 | 1710 Eif2b2        |
| ENSMUSG00000004393 | 1711 Ddx56         |
| ENSMUSG00000085931 | 1712 Gm12648       |
| ENSMUSG00000006024 | 1713 Napa          |
| ENSMUSG00000029148 | 1714 Nrpb1         |
| ENSMUSG00000036550 | 1715 Cnot1         |
| ENSMUSG00000002059 | 1716 Rab34         |
| ENSMUSG00000001289 | 1717 Pfdn5         |
| ENSMUSG00000026185 | 1718 Igfbp5        |
| ENSMUSG00000058571 | 1719 Gpc6          |
| ENSMUSG00000031278 | 1720 Acsl4         |

|                    |               |
|--------------------|---------------|
| ENSMUSG00000020705 | 1721 Ddx42    |
| ENSMUSG00000020171 | 1722 Yeats4   |
| ENSMUSG00000021474 | 1723 Sfxn1    |
| ENSMUSG00000031007 | 1724 Atp6ap2  |
| ENSMUSG00000061518 | 1725 Cox5b    |
| ENSMUSG00000020859 | 1726 Spag9    |
| ENSMUSG00000020741 | 1727 Cluh     |
| ENSMUSG00000000751 | 1728 Rpa1     |
| ENSMUSG00000031453 | 1729 Rasa3    |
| ENSMUSG00000053801 | 1730 Grwd1    |
| ENSMUSG00000002660 | 1731 Clpp     |
| ENSMUSG00000035351 | 1732 Nup37    |
| ENSMUSG00000070729 | 1733 Gm12966  |
| ENSMUSG00000021811 | 1734 Dnajc9   |
| ENSMUSG00000021645 | 1735 Smn1     |
| ENSMUSG00000041974 | 1736 Spidr    |
| ENSMUSG00000028419 | 1737 Chmp5    |
| ENSMUSG00000050608 | 1738 Minos1   |
| ENSMUSG00000027852 | 1739 Nras     |
| ENSMUSG00000042138 | 1740 Msantd2  |
| ENSMUSG00000006678 | 1741 Pola1    |
| ENSMUSG00000063316 | 1742 Rpl27    |
| ENSMUSG00000063200 | 1743 Nol7     |
| ENSMUSG00000015889 | 1744 Lta4h    |
| ENSMUSG00000001783 | 1745 Rtcb     |
| ENSMUSG00000028573 | 1746 Fggy     |
| ENSMUSG00000024854 | 1747 Pold4    |
| ENSMUSG00000019970 | 1748 Sgk1     |
| ENSMUSG00000033166 | 1749 Dis3     |
| ENSMUSG00000060036 | 1750 Rpl3     |
| ENSMUSG00000027111 | 1751 Itga6    |
| ENSMUSG00000024078 | 1752 Ttc27    |
| ENSMUSG00000034807 | 1753 Colgalt1 |
| ENSMUSG00000021796 | 1754 Bmpr1a   |
| ENSMUSG00000027998 | 1755 Plrg1    |
| ENSMUSG00000038733 | 1756 Wdr26    |
| ENSMUSG00000011257 | 1757 Pabpc4   |
| ENSMUSG00000020277 | 1758 Pfk1     |
| ENSMUSG00000045103 | 1759 Dmd      |
| ENSMUSG00000054733 | 1760 Msra     |
| ENSMUSG00000033228 | 1761 Scaf11   |
| ENSMUSG00000021114 | 1762 Atp6v1d  |

|                    |                    |
|--------------------|--------------------|
| ENSMUSG00000005481 | 1763 Ddx39         |
| ENSMUSG00000026083 | 1764 Eif5b         |
| ENSMUSG00000042487 | 1765 Leo1          |
| ENSMUSG00000021733 | 1766 Slc4a7        |
| ENSMUSG00000025283 | 1767 Sat1          |
| ENSMUSG00000020029 | 1768 Nudt4         |
| ENSMUSG00000003226 | 1769 Ranbp2        |
| ENSMUSG00000071533 | 1770 Pcpn          |
| ENSMUSG00000039016 | 1771 Timm8b        |
| ENSMUSG00000027706 | 1772 Sec62         |
| ENSMUSG00000021823 | 1773 Vcl           |
| ENSMUSG00000030232 | 1774 Aebp2         |
| ENSMUSG00000028525 | 1775 Pde4b         |
| ENSMUSG00000032826 | 1776 Ank2          |
| ENSMUSG00000003380 | 1777 Rabac1        |
| ENSMUSG00000079215 | 1778 Zfp664        |
| ENSMUSG00000020946 | 1779 Gosr2         |
| ENSMUSG00000024238 | 1780 Zeb1          |
| ENSMUSG00000052837 | 1781 Junb          |
| ENSMUSG00000032381 | 1782 Fam96a        |
| ENSMUSG00000031386 | 1783 Hcfc1         |
| ENSMUSG00000029093 | 1784 Sorcs2        |
| ENSMUSG00000028060 | 1785 2810403A07Rik |
| ENSMUSG00000020471 | 1786 Pold2         |
| ENSMUSG00000031990 | 1787 Jam3          |
| ENSMUSG00000040797 | 1788 Iqsec3        |
| ENSMUSG00000028173 | 1789 Wls           |
| ENSMUSG00000021814 | 1790 Anxa7         |
| ENSMUSG00000016528 | 1791 Mapkapk2      |
| ENSMUSG00000020993 | 1792 Trappc6b      |
| ENSMUSG00000038759 | 1793 Nup205        |
| ENSMUSG00000019782 | 1794 Rwdd1         |
| ENSMUSG00000022021 | 1795 Diap3         |
| ENSMUSG00000045671 | 1796 Spred2        |
| ENSMUSG00000021171 | 1797 Esyt2         |
| ENSMUSG00000039515 | 1798 Ppp2r4        |
| ENSMUSG00000006273 | 1799 Atp6v1b2      |
| ENSMUSG00000025439 | 1800 Clns1a        |
| ENSMUSG00000021686 | 1801 Ap3b1         |
| ENSMUSG00000042625 | 1802 Safb2         |
| ENSMUSG00000032525 | 1803 Nktr          |
| ENSMUSG00000028793 | 1804 Rnf19b        |

|                     |                    |
|---------------------|--------------------|
| ENSMUSG00000025492  | 1805 Ifitm3        |
| ENSMUSG00000025789  | 1806 St8sia2       |
| ENSMUSG00000039607  | 1807 Rbms3         |
| ENSMUSG00000022897  | 1808 Dyrk1a        |
| ENSMUSG00000050953  | 1809 Gja1          |
| ENSMUSG00000028382  | 1810 Ptbp3         |
| ENSMUSG00000003033  | 1811 Ap1m1         |
| ENSMUSG00000073616  | 1812 Myeov2        |
| ENSMUSG00000028868  | 1813 Wasf2         |
| ENSMUSG00000067847  | 1814 Romo1         |
| ENSMUSG00000037012  | 1815 Hk1           |
| ENSMUSG00000029478  | 1816 Ncor2         |
| ENSMUSG00000021917  | 1817 Spcs1         |
| ENSMUSG00000027430  | 1818 Dtd1          |
| ENSMUSG00000008140  | 1819 Emc10         |
| ENSMUSG00000059070  | 1820 Rpl18         |
| ENSMUSG00000056770  | 1821 Setd3         |
| ENSMUSG00000048000  | 1822 Gigyf2        |
| ENSMUSG00000046865  | 1823 Fbl           |
| ENSMUSG00000005469  | 1824 Prkaca        |
| ENSMUSG00000026718  | 1825 Stam          |
| ENSMUSG000000105331 | 1826 Gm29865       |
| ENSMUSG00000020256  | 1827 Aldh1l2       |
| ENSMUSG00000036591  | 1828 Arhgap21      |
| ENSMUSG00000020078  | 1829 Vps26a        |
| ENSMUSG00000056671  | 1830 Prelid2       |
| ENSMUSG00000086080  | 1831 1700123O12Rik |
| ENSMUSG00000030315  | 1832 Vgll4         |
| ENSMUSG00000034681  | 1833 Rnps1         |
| ENSMUSG00000035227  | 1834 Spcs2         |
| ENSMUSG00000029207  | 1835 Apbb2         |
| ENSMUSG00000065990  | 1836 Aurkaip1      |
| ENSMUSG00000035152  | 1837 Ap2b1         |
| ENSMUSG00000028557  | 1838 Rnf11         |
| ENSMUSG00000037857  | 1839 Nufip2        |
| ENSMUSG00000029014  | 1840 Dnajc2        |
| ENSMUSG00000033918  | 1841 Parl          |
| ENSMUSG00000018501  | 1842 Ncor1         |
| ENSMUSG00000017264  | 1843 Exosc10       |
| ENSMUSG00000041765  | 1844 Ubac2         |
| ENSMUSG00000042734  | 1845 Ttc9          |
| ENSMUSG00000028763  | 1846 Hspg2         |

|                    |               |
|--------------------|---------------|
| ENSMUSG00000022685 | 1847 Parn     |
| ENSMUSG00000026526 | 1848 Fh1      |
| ENSMUSG00000039703 | 1849 Nploc4   |
| ENSMUSG00000013629 | 1850 Cad      |
| ENSMUSG00000018412 | 1851 Kansl1   |
| ENSMUSG00000032185 | 1852 Carm1    |
| ENSMUSG00000061479 | 1853 Snrpa    |
| ENSMUSG00000071547 | 1854 Nt5dc2   |
| ENSMUSG00000003316 | 1855 Glg1     |
| ENSMUSG00000029088 | 1856 Kcnip4   |
| ENSMUSG00000023079 | 1857 Gtf2ird1 |
| ENSMUSG00000027522 | 1858 Stx16    |
| ENSMUSG00000097263 | 1859 Gm26804  |
| ENSMUSG00000039234 | 1860 Sec24d   |
| ENSMUSG00000020180 | 1861 Snrpd3   |
| ENSMUSG00000037351 | 1862 Actr1b   |
| ENSMUSG00000054387 | 1863 Mdm4     |
| ENSMUSG00000022257 | 1864 Laptm4b  |
| ENSMUSG00000027349 | 1865 Fam98b   |
| ENSMUSG00000063015 | 1866 Ccni     |
| ENSMUSG00000085866 | 1867 Gm15218  |
| ENSMUSG00000062075 | 1868 Lmnb2    |
| ENSMUSG00000072704 | 1869 Smim1011 |
| ENSMUSG00000024535 | 1870 Snx24    |
| ENSMUSG00000082423 | 1871 Gm15148  |
| ENSMUSG00000079477 | 1872 Rab7     |
| ENSMUSG00000036499 | 1873 Eea1     |
| ENSMUSG00000028910 | 1874 Mecr     |
| ENSMUSG00000047963 | 1875 Stbd1    |
| ENSMUSG00000039000 | 1876 Ube3c    |
| ENSMUSG00000000378 | 1877 Ccm2     |
| ENSMUSG00000035297 | 1878 Cops4    |
| ENSMUSG00000019487 | 1879 Trip10   |
| ENSMUSG00000038252 | 1880 Ncapd2   |
| ENSMUSG00000055531 | 1881 Cpsf6    |
| ENSMUSG00000034724 | 1882 Cnot6l   |
| ENSMUSG00000052727 | 1883 Map1b    |
| ENSMUSG00000000078 | 1884 Klf6     |
| ENSMUSG00000001441 | 1885 Npepps   |
| ENSMUSG00000038398 | 1886 Upf3a    |
| ENSMUSG00000036278 | 1887 Macrocl1 |
| ENSMUSG00000032199 | 1888 Polr2m   |

|                     |                 |
|---------------------|-----------------|
| ENSMUSG00000056629  | 1889 Fkbp2      |
| ENSMUSG00000081792  | 1890 Anp32b-ps1 |
| ENSMUSG00000038717  | 1891 Atp5l      |
| ENSMUSG00000032042  | 1892 Srpr       |
| ENSMUSG00000021012  | 1893 Zc3h14     |
| ENSMUSG00000030286  | 1894 Emc3       |
| ENSMUSG00000006599  | 1895 Gtf2h1     |
| ENSMUSG00000026872  | 1896 Zeb2       |
| ENSMUSG00000018189  | 1897 Uchl5      |
| ENSMUSG00000028567  | 1898 Txndc12    |
| ENSMUSG00000027006  | 1899 Dnajc10    |
| ENSMUSG00000041236  | 1900 Vps41      |
| ENSMUSG00000020952  | 1901 Scfd1      |
| ENSMUSG00000031575  | 1902 Ash2l      |
| ENSMUSG00000002741  | 1903 Ykt6       |
| ENSMUSG000000050891 | 1904 Tatdn1     |
| ENSMUSG00000035203  | 1905 Epn1       |
| ENSMUSG000000107383 | 1906 Gm4366     |
| ENSMUSG00000018765  | 1907 Fxr2       |
| ENSMUSG00000032612  | 1908 Usp4       |
| ENSMUSG00000024563  | 1909 Smad2      |
| ENSMUSG000000059291 | 1910 Rpl11      |
| ENSMUSG00000038909  | 1911 Kat7       |
| ENSMUSG00000067873  | 1912 Htatsf1    |
| ENSMUSG00000022295  | 1913 Atp6v1c1   |
| ENSMUSG00000020766  | 1914 Galk1      |
| ENSMUSG00000030042  | 1915 Pole4      |
| ENSMUSG00000041390  | 1916 Mdfic      |
| ENSMUSG00000046169  | 1917 Adamts6    |
| ENSMUSG00000041734  | 1918 Kirrel     |
| ENSMUSG00000066043  | 1919 Phactr4    |
| ENSMUSG00000041313  | 1920 Slc7a1     |
| ENSMUSG00000027282  | 1921 Mtch2      |
| ENSMUSG00000009073  | 1922 Nf2        |
| ENSMUSG00000097554  | 1923 Gm26825    |
| ENSMUSG00000041815  | 1924 Poldip3    |
| ENSMUSG00000061816  | 1925 Myl1       |
| ENSMUSG00000062248  | 1926 Cks2       |
| ENSMUSG00000021361  | 1927 Tmem14c    |
| ENSMUSG00000032407  | 1928 U2surp     |
| ENSMUSG00000070934  | 1929 Rraga      |
| ENSMUSG00000039852  | 1930 Rere       |

|                    |                    |
|--------------------|--------------------|
| ENSMUSG00000010048 | 1931 Ifrd2         |
| ENSMUSG00000019795 | 1932 Pcm1          |
| ENSMUSG00000022962 | 1933 Gart          |
| ENSMUSG00000021973 | 1934 Micu2         |
| ENSMUSG00000020376 | 1935 Rnf130        |
| ENSMUSG00000026251 | 1936 Chrnd         |
| ENSMUSG00000073700 | 1937 Khl1          |
| ENSMUSG00000018559 | 1938 Ctdnep1       |
| ENSMUSG00000001785 | 1939 Pwp1          |
| ENSMUSG00000027012 | 1940 Dync1i2       |
| ENSMUSG00000038170 | 1941 Pde4dip       |
| ENSMUSG00000036023 | 1942 Parp2         |
| ENSMUSG00000006276 | 1943 Eps15l1       |
| ENSMUSG00000008136 | 1944 Fhl2          |
| ENSMUSG00000025236 | 1945 Adpgk         |
| ENSMUSG00000015672 | 1946 Mrpl32        |
| ENSMUSG00000026926 | 1947 Pmpca         |
| ENSMUSG00000039033 | 1948 Tasp1         |
| ENSMUSG00000059923 | 1949 Grb2          |
| ENSMUSG00000025878 | 1950 Uimc1         |
| ENSMUSG00000100441 | 1951 Gm7266        |
| ENSMUSG00000023965 | 1952 Fbxl17        |
| ENSMUSG00000026131 | 1953 Dst           |
| ENSMUSG00000053838 | 1954 Nudcd3        |
| ENSMUSG00000021972 | 1955 Hmbox1        |
| ENSMUSG00000036402 | 1956 Gng12         |
| ENSMUSG00000024758 | 1957 Rtn3          |
| ENSMUSG00000027469 | 1958 Tpx2          |
| ENSMUSG00000049760 | 1959 2410015M20Rik |
| ENSMUSG00000022744 | 1960 Cldnd1        |
| ENSMUSG00000028394 | 1961 Pole3         |
| ENSMUSG00000021427 | 1962 Ssr1          |
| ENSMUSG00000035171 | 1963 1110059E24Rik |
| ENSMUSG00000036501 | 1964 Fam13b        |
| ENSMUSG00000024981 | 1965 Acsl5         |
| ENSMUSG00000026836 | 1966 Acvr1         |
| ENSMUSG00000007656 | 1967 Arpp19        |
| ENSMUSG00000054079 | 1968 Utp18         |
| ENSMUSG00000029422 | 1969 Rsrc2         |
| ENSMUSG00000031647 | 1970 Mfap3l        |
| ENSMUSG00000051518 | 1971 Rps19bp1      |
| ENSMUSG00000028926 | 1972 Cdk14         |

|                    |                    |
|--------------------|--------------------|
| ENSMUSG00000024985 | 1973 Tcf7l2        |
| ENSMUSG00000026843 | 1974 Fubp3         |
| ENSMUSG00000022974 | 1975 Paxbp1        |
| ENSMUSG00000033149 | 1976 Phldb2        |
| ENSMUSG00000067851 | 1977 Arfgef1       |
| ENSMUSG00000005378 | 1978 Wbscr22       |
| ENSMUSG00000035575 | 1979 Utp6          |
| ENSMUSG00000008348 | 1980 Ubc           |
| ENSMUSG00000031555 | 1981 Adam9         |
| ENSMUSG00000052920 | 1982 Prkg1         |
| ENSMUSG00000032320 | 1983 Rcn2          |
| ENSMUSG00000038459 | 1984 Abhd17c       |
| ENSMUSG00000006740 | 1985 Kif5b         |
| ENSMUSG00000036620 | 1986 Mgat4b        |
| ENSMUSG00000024501 | 1987 Dpysl3        |
| ENSMUSG00000031657 | 1988 Heatr3        |
| ENSMUSG00000107011 | 1989 Gm42906       |
| ENSMUSG00000015087 | 1990 Rabl6         |
| ENSMUSG00000030842 | 1991 Lamtor1       |
| ENSMUSG00000068699 | 1992 Flnc          |
| ENSMUSG00000044813 | 1993 Shb           |
| ENSMUSG00000024404 | 1994 Riok3         |
| ENSMUSG00000019579 | 1995 Mydgf         |
| ENSMUSG00000004069 | 1996 Dnaja3        |
| ENSMUSG00000042520 | 1997 Ubap2l        |
| ENSMUSG00000022463 | 1998 Srebf2        |
| ENSMUSG00000063410 | 1999 Stk24         |
| ENSMUSG00000084833 | 2000 Gm12649       |
| ENSMUSG00000042292 | 2001 Mkl1          |
| ENSMUSG00000026727 | 2002 Rsu1          |
| ENSMUSG00000044471 | 2003 Lincpint      |
| ENSMUSG00000030770 | 2004 Parva         |
| ENSMUSG00000042660 | 2005 Wdr55         |
| ENSMUSG00000002297 | 2006 Dbf4          |
| ENSMUSG00000037253 | 2007 Mex3c         |
| ENSMUSG00000097071 | 2008 4930544I03Rik |
| ENSMUSG00000030265 | 2009 Kras          |
| ENSMUSG00000022338 | 2010 Eny2          |
| ENSMUSG00000053119 | 2011 Chmp3         |
| ENSMUSG00000006373 | 2012 Pgrmc1        |
| ENSMUSG00000036241 | 2013 Ube2r2        |
| ENSMUSG00000026833 | 2014 Olfm1         |



|                    |                     |
|--------------------|---------------------|
| ENSMUSG00000021072 | 2015 Tmx1           |
| ENSMUSG00000022635 | 2016 Zcrb1          |
| ENSMUSG00000022369 | 2017 Mtbp           |
| ENSMUSG00000018651 | 2018 Tada2a         |
| ENSMUSG00000031229 | 2019 Atrx           |
| ENSMUSG00000013698 | 2020 Pea15a         |
| ENSMUSG00000069670 | 2021 Nkain2         |
| ENSMUSG00000025381 | 2022 Cnpy2          |
| ENSMUSG00000001964 | 2023 Emd            |
| ENSMUSG00000010097 | 2024 Nxf1           |
| ENSMUSG00000027201 | 2025 Myef2          |
| ENSMUSG00000024539 | 2026 Ptpn2          |
| ENSMUSG00000002455 | 2027 Prpf6          |
| ENSMUSG00000030126 | 2028 Tmcc1          |
| ENSMUSG00000064210 | 2029 Ano6           |
| ENSMUSG00000025024 | 2030 Smndc1         |
| ENSMUSG00000000223 | 2031 Drp2           |
| ENSMUSG00000034659 | 2032 Tmem109        |
| ENSMUSG00000056167 | 2033 Cnot10         |
| ENSMUSG00000031697 | 2034 Orc6           |
| ENSMUSG00000031545 | 2035 Gpat4          |
| ENSMUSG00000043639 | 2036 Rbm20          |
| ENSMUSG00000017715 | 2037 Pgs1           |
| ENSMUSG00000062234 | 2038 Gak            |
| ENSMUSG00000029673 | 2039 Aut2           |
| ENSMUSG00000015120 | 2040 Ube2i          |
| ENSMUSG00000041846 | 2041 Smek1          |
| ENSMUSG00000040618 | 2042 Pck2           |
| ENSMUSG00000030602 | 2043 Pak4           |
| ENSMUSG00000107470 | 2044 CAAA01093177.1 |
| ENSMUSG00000020111 | 2045 Micu1          |
| ENSMUSG00000015994 | 2046 Fnta           |
| ENSMUSG00000016477 | 2047 E2f3           |
| ENSMUSG00000029174 | 2048 Tbc1d1         |
| ENSMUSG00000037475 | 2049 Thoc2          |
| ENSMUSG00000028322 | 2050 Exosc3         |
| ENSMUSG00000060279 | 2051 Ap2a1          |
| ENSMUSG00000031167 | 2052 Rbm3           |
| ENSMUSG00000054693 | 2053 Adam10         |
| ENSMUSG00000022661 | 2054 Cd200          |
| ENSMUSG00000022112 | 2055 Gpc5           |
| ENSMUSG00000024507 | 2056 Hsd17b4        |

|                     |                    |
|---------------------|--------------------|
| ENSMUSG00000036817  | 2057 Sun1          |
| ENSMUSG00000045767  | 2058 B230219D22Rik |
| ENSMUSG00000028560  | 2059 Usp1          |
| ENSMUSG00000020814  | 2060 Mxra7         |
| ENSMUSG00000021124  | 2061 Vti1b         |
| ENSMUSG00000024544  | 2062 Ldlrad4       |
| ENSMUSG00000022400  | 2063 Rbx1          |
| ENSMUSG00000021248  | 2064 Tmed10        |
| ENSMUSG00000020091  | 2065 Eif4ebp2      |
| ENSMUSG00000029068  | 2066 Ccnl2         |
| ENSMUSG00000025702  | 2067 March8        |
| ENSMUSG00000025451  | 2068 Paip1         |
| ENSMUSG00000032329  | 2069 Hmg20a        |
| ENSMUSG00000027808  | 2070 Serp1         |
| ENSMUSG00000020671  | 2071 Rab10         |
| ENSMUSG00000068290  | 2072 Ddrgk1        |
| ENSMUSG00000038690  | 2073 Atp5j2        |
| ENSMUSG00000021822  | 2074 Plau          |
| ENSMUSG00000025791  | 2075 Pgm2          |
| ENSMUSG00000020922  | 2076 Lsm12         |
| ENSMUSG00000019699  | 2077 Akt3          |
| ENSMUSG00000063018  | 2078 2010204K13Rik |
| ENSMUSG000000100862 | 2079 Gm10925       |
| ENSMUSG00000048537  | 2080 Phldb1        |
| ENSMUSG00000079426  | 2081 Arpc4         |
| ENSMUSG00000026767  | 2082 Fam188a       |
| ENSMUSG00000021481  | 2083 Zfp346        |
| ENSMUSG00000030753  | 2084 Prkrir        |
| ENSMUSG00000055491  | 2085 Pprc1         |
| ENSMUSG00000058809  | 2086 Hspd1-ps3     |
| ENSMUSG00000011114  | 2087 Tbrg1         |
| ENSMUSG00000021840  | 2088 Mapk1ip1l     |
| ENSMUSG00000026554  | 2089 Dcaf8         |
| ENSMUSG00000027303  | 2090 Ptpra         |
| ENSMUSG00000034462  | 2091 Pkd2          |
| ENSMUSG00000028156  | 2092 Eif4e         |
| ENSMUSG00000034432  | 2093 Cops8         |
| ENSMUSG00000024772  | 2094 Ehd1          |
| ENSMUSG00000022808  | 2095 Snx4          |
| ENSMUSG00000061576  | 2096 Dpp6          |
| ENSMUSG00000027774  | 2097 Gfm1          |
| ENSMUSG00000061787  | 2098 Rps17         |

|                     |                    |
|---------------------|--------------------|
| ENSMUSG00000025968  | 2099 Ndufs1        |
| ENSMUSG00000023939  | 2100 Mrpl14        |
| ENSMUSG00000027829  | 2101 Ccnl1         |
| ENSMUSG00000020265  | 2102 Sumo3         |
| ENSMUSG00000040785  | 2103 Ttc3          |
| ENSMUSG00000027968  | 2104 Larp7         |
| ENSMUSG00000091896  | 2105 Ube2d2a       |
| ENSMUSG00000032112  | 2106 Trappc4       |
| ENSMUSG00000024150  | 2107 Mcfd2         |
| ENSMUSG00000001089  | 2108 Luzp1         |
| ENSMUSG00000024960  | 2109 Plcb3         |
| ENSMUSG00000022707  | 2110 Gbe1          |
| ENSMUSG00000020362  | 2111 Cnot6         |
| ENSMUSG00000037643  | 2112 Prkci         |
| ENSMUSG00000000127  | 2113 Fer           |
| ENSMUSG000000087590 | 2114 Epb41l4aos    |
| ENSMUSG00000018736  | 2115 Ndel1         |
| ENSMUSG000000106909 | 2116 Gm43122       |
| ENSMUSG000000036167 | 2117 Pphln1        |
| ENSMUSG00000038784  | 2118 Cnot4         |
| ENSMUSG00000063550  | 2119 Nup98         |
| ENSMUSG000000036372 | 2120 Tmem258       |
| ENSMUSG00000036180  | 2121 Gatad2a       |
| ENSMUSG00000001285  | 2122 Myg1          |
| ENSMUSG00000002017  | 2123 Fam98a        |
| ENSMUSG00000043284  | 2124 Tmem11        |
| ENSMUSG00000026799  | 2125 Med27         |
| ENSMUSG00000023169  | 2126 Slc38a1       |
| ENSMUSG00000025743  | 2127 Sdc3          |
| ENSMUSG00000026491  | 2128 Ahctf1        |
| ENSMUSG000000101567 | 2129 Txn-ps1       |
| ENSMUSG00000021639  | 2130 Gtf2h2        |
| ENSMUSG00000022033  | 2131 Pbk           |
| ENSMUSG00000090386  | 2132 Mir99ahg      |
| ENSMUSG00000048170  | 2133 Mcmbp         |
| ENSMUSG00000028399  | 2134 Ptprd         |
| ENSMUSG000000031927 | 2135 1700012B09Rik |
| ENSMUSG000000033769 | 2136 Exoc6b        |
| ENSMUSG00000021496  | 2137 Pcbd2         |
| ENSMUSG00000022883  | 2138 Robo1         |
| ENSMUSG00000025871  | 2139 4833439L19Rik |
| ENSMUSG000000031198 | 2140 Fundc2        |

|                    |                 |
|--------------------|-----------------|
| ENSMUSG00000025862 | 2141 Stag2      |
| ENSMUSG00000040842 | 2142 Szrd1      |
| ENSMUSG00000020978 | 2143 Klhdc2     |
| ENSMUSG00000015149 | 2144 Sirt2      |
| ENSMUSG00000074457 | 2145 S100a16    |
| ENSMUSG00000040824 | 2146 Snrpd2     |
| ENSMUSG00000022663 | 2147 Atg3       |
| ENSMUSG00000011096 | 2148 Akt1s1     |
| ENSMUSG00000030733 | 2149 Sh2b1      |
| ENSMUSG00000031843 | 2150 Mphosph6   |
| ENSMUSG00000020534 | 2151 Shmt1      |
| ENSMUSG00000002778 | 2152 Kdelr1     |
| ENSMUSG00000019837 | 2153 Gtf3c6     |
| ENSMUSG00000031774 | 2154 Fam192a    |
| ENSMUSG00000038324 | 2155 Trpc4ap    |
| ENSMUSG00000002679 | 2156 Med6       |
| ENSMUSG00000025868 | 2157 Higd2a     |
| ENSMUSG00000001383 | 2158 Zmat2      |
| ENSMUSG00000020444 | 2159 Guk1       |
| ENSMUSG00000022204 | 2160 Ngdn       |
| ENSMUSG00000072692 | 2161 Rpl37rt    |
| ENSMUSG00000084416 | 2162 Rpl10a-ps1 |
| ENSMUSG00000014349 | 2163 Ube2z      |
| ENSMUSG00000028879 | 2164 Stx12      |
| ENSMUSG00000026857 | 2165 Ntmt1      |
| ENSMUSG00000021870 | 2166 Slmap      |
| ENSMUSG00000032897 | 2167 Nfyc       |
| ENSMUSG00000028273 | 2168 Pdlim5     |
| ENSMUSG00000039771 | 2169 Polr2j     |
| ENSMUSG00000031659 | 2170 Adcy7      |
| ENSMUSG00000057147 | 2171 Dph6       |
| ENSMUSG00000068328 | 2172 Aup1       |
| ENSMUSG00000020483 | 2173 Dynll2     |
| ENSMUSG00000020844 | 2174 Nxn        |
| ENSMUSG00000035021 | 2175 Baz1a      |
| ENSMUSG00000024976 | 2176 Shoc2      |
| ENSMUSG00000000131 | 2177 Xpo6       |
| ENSMUSG00000076432 | 2178 Ywhaq      |
| ENSMUSG00000050244 | 2179 Heatr1     |
| ENSMUSG00000038708 | 2180 Golga4     |
| ENSMUSG00000027737 | 2181 Slc7a11    |
| ENSMUSG00000031536 | 2182 Polb       |

|                     |               |
|---------------------|---------------|
| ENSMUSG00000054237  | 2183 Fra10ac1 |
| ENSMUSG00000030847  | 2184 Bag3     |
| ENSMUSG00000020640  | 2185 Itsn2    |
| ENSMUSG00000032349  | 2186 Elovl5   |
| ENSMUSG00000038371  | 2187 Sbf2     |
| ENSMUSG00000066324  | 2188 Impad1   |
| ENSMUSG00000061244  | 2189 Exoc5    |
| ENSMUSG00000002052  | 2190 Supt6    |
| ENSMUSG00000019558  | 2191 Slc6a8   |
| ENSMUSG00000022816  | 2192 Fstl1    |
| ENSMUSG00000003423  | 2193 Pih1d1   |
| ENSMUSG00000020570  | 2194 Sypl     |
| ENSMUSG00000034437  | 2195 Gm9761   |
| ENSMUSG00000046432  | 2196 Ngfrap1  |
| ENSMUSG00000037499  | 2197 Nenf     |
| ENSMUSG000000094530 | 2198 Gm21399  |
| ENSMUSG00000041560  | 2199 Gltscr2  |
| ENSMUSG00000045799  | 2200 Gm9800   |
| ENSMUSG00000053477  | 2201 Tcf4     |
| ENSMUSG00000025366  | 2202 Esyt1    |
| ENSMUSG00000020897  | 2203 Aurkb    |
| ENSMUSG00000013160  | 2204 Atp6v0d1 |
| ENSMUSG00000053436  | 2205 Mapk14   |
| ENSMUSG00000020794  | 2206 Ube2g1   |
| ENSMUSG00000041654  | 2207 Slc39a11 |
| ENSMUSG00000028069  | 2208 Gpatch4  |
| ENSMUSG00000065226  | 2209 Gm25791  |
| ENSMUSG00000037957  | 2210 Wdr20    |
| ENSMUSG00000022141  | 2211 Nipbl    |
| ENSMUSG00000021025  | 2212 Nfkbia   |
| ENSMUSG00000058076  | 2213 Sdhc     |
| ENSMUSG00000026094  | 2214 Stk17b   |
| ENSMUSG00000030254  | 2215 Rad18    |
| ENSMUSG00000037013  | 2216 Ss18     |
| ENSMUSG00000028455  | 2217 Stoml2   |
| ENSMUSG00000008333  | 2218 Snrpb2   |
| ENSMUSG000000102805 | 2219 Gm37240  |
| ENSMUSG00000034377  | 2220 Tulp4    |
| ENSMUSG00000003534  | 2221 Ddr1     |
| ENSMUSG00000020873  | 2222 Slc35b1  |
| ENSMUSG00000020130  | 2223 Tbc1d15  |
| ENSMUSG00000032263  | 2224 Bckdhb   |

|                    |               |
|--------------------|---------------|
| ENSMUSG00000040383 | 2225 Aqr      |
| ENSMUSG00000038848 | 2226 Ythdf1   |
| ENSMUSG00000019505 | 2227 Ubb      |
| ENSMUSG00000027649 | 2228 Ctnnbl1  |
| ENSMUSG00000041408 | 2229 Wapl     |
| ENSMUSG00000023106 | 2230 Denr     |
| ENSMUSG00000010936 | 2231 Vac14    |
| ENSMUSG00000058656 | 2232 Samd12   |
| ENSMUSG00000020745 | 2233 Pafah1b1 |
| ENSMUSG00000001415 | 2234 Smg5     |
| ENSMUSG00000034880 | 2235 Mrpl34   |
| ENSMUSG00000032254 | 2236 Kif23    |
| ENSMUSG00000032601 | 2237 Prkar2a  |
| ENSMUSG00000096054 | 2238 Syne1    |
| ENSMUSG00000022360 | 2239 Atad2    |
| ENSMUSG00000029455 | 2240 Aldh2    |
| ENSMUSG00000032998 | 2241 Foxj3    |
| ENSMUSG00000024695 | 2242 Zfp91    |
| ENSMUSG00000020650 | 2243 Bcap29   |
| ENSMUSG00000047260 | 2244 Emc6     |
| ENSMUSG00000026558 | 2245 Uck2     |
| ENSMUSG00000029202 | 2246 Pds5a    |
| ENSMUSG00000006398 | 2247 Cdc20    |
| ENSMUSG00000029404 | 2248 Arl6ip4  |
| ENSMUSG00000028187 | 2249 Rpf1     |
| ENSMUSG00000028759 | 2250 Hp1bp3   |
| ENSMUSG00000029610 | 2251 Aimp2    |
| ENSMUSG00000022889 | 2252 Mrpl39   |
| ENSMUSG00000031776 | 2253 Arl2bp   |
| ENSMUSG00000020484 | 2254 Xbp1     |
| ENSMUSG00000021262 | 2255 Evi      |
| ENSMUSG00000022538 | 2256 Lsg1     |
| ENSMUSG00000074698 | 2257 Csnk2a1  |
| ENSMUSG00000019802 | 2258 Sec63    |
| ENSMUSG00000031820 | 2259 Babam1   |
| ENSMUSG00000031605 | 2260 Kihl2    |
| ENSMUSG00000030839 | 2261 Sergef   |
| ENSMUSG00000034574 | 2262 Daam1    |
| ENSMUSG00000055053 | 2263 Nfic     |
| ENSMUSG00000083621 | 2264 Gm14586  |
| ENSMUSG00000074221 | 2265 Zfp568   |
| ENSMUSG00000022983 | 2266 Scaf4    |

|                    |                    |
|--------------------|--------------------|
| ENSMUSG00000092274 | 2267 Neat1         |
| ENSMUSG00000027859 | 2268 Ngf           |
| ENSMUSG00000002825 | 2269 Qtrt1         |
| ENSMUSG00000023923 | 2270 Tbc1d5        |
| ENSMUSG00000050565 | 2271 Tor1aip2      |
| ENSMUSG00000025745 | 2272 Hadha         |
| ENSMUSG00000004771 | 2273 Rab11a        |
| ENSMUSG00000004356 | 2274 Utp20         |
| ENSMUSG00000031590 | 2275 Frq1          |
| ENSMUSG00000032194 | 2276 Kank2         |
| ENSMUSG00000024940 | 2277 Ltbp3         |
| ENSMUSG00000022191 | 2278 Drosha        |
| ENSMUSG00000035268 | 2279 Pkig          |
| ENSMUSG00000044018 | 2280 Mrpl50        |
| ENSMUSG00000045414 | 2281 1190002N15Rik |
| ENSMUSG00000020687 | 2282 Cdc27         |
| ENSMUSG00000022094 | 2283 Slc39a14      |
| ENSMUSG00000068205 | 2284 MacroD2       |
| ENSMUSG00000064127 | 2285 Med14         |
| ENSMUSG00000084289 | 2286 Gm6977        |
| ENSMUSG00000105068 | 2287 Gm42950       |
| ENSMUSG00000007415 | 2288 Gatad1        |
| ENSMUSG00000030942 | 2289 Thumpd1       |
| ENSMUSG00000025199 | 2290 Chuk          |
| ENSMUSG00000004667 | 2291 Polr2e        |
| ENSMUSG00000028062 | 2292 Lamtor2       |
| ENSMUSG00000027330 | 2293 Cdc25b        |
| ENSMUSG00000030447 | 2294 Cyfip1        |
| ENSMUSG00000049751 | 2295 Rpl36a1       |
| ENSMUSG00000022634 | 2296 Yaf2          |
| ENSMUSG00000000838 | 2297 Fmr1          |
| ENSMUSG00000061838 | 2298 Suclg2        |
| ENSMUSG00000020629 | 2299 Adi1          |
| ENSMUSG00000046201 | 2300 Scaf8         |
| ENSMUSG00000023353 | 2301 Agap3         |
| ENSMUSG00000028884 | 2302 Rpa2          |
| ENSMUSG00000067736 | 2303 Gm10222       |
| ENSMUSG00000079184 | 2304 Mphosph8      |
| ENSMUSG00000003299 | 2305 Mrpl4         |
| ENSMUSG00000022270 | 2306 Fam134b       |
| ENSMUSG00000044224 | 2307 Dnajc21       |
| ENSMUSG00000035704 | 2308 Alg8          |

|                    |               |
|--------------------|---------------|
| ENSMUSG00000028646 | 2309 Rragc    |
| ENSMUSG00000101111 | 2310 Gm28437  |
| ENSMUSG00000069682 | 2311 Gm10275  |
| ENSMUSG00000000028 | 2312 Cdc45    |
| ENSMUSG00000041650 | 2313 Pcca     |
| ENSMUSG00000021548 | 2314 Ccnh     |
| ENSMUSG00000078453 | 2315 Abracl   |
| ENSMUSG00000031750 | 2316 Il34     |
| ENSMUSG00000027288 | 2317 Zfp106   |
| ENSMUSG00000030105 | 2318 Arl8b    |
| ENSMUSG00000024287 | 2319 Thoc1    |
| ENSMUSG00000027454 | 2320 Gins1    |
| ENSMUSG00000027313 | 2321 Chac1    |
| ENSMUSG00000026087 | 2322 Mrpl30   |
| ENSMUSG00000027810 | 2323 Eif2a    |
| ENSMUSG00000022913 | 2324 Psmg1    |
| ENSMUSG00000030512 | 2325 Snrpa1   |
| ENSMUSG00000033629 | 2326 Hacd3    |
| ENSMUSG00000016252 | 2327 Atp5e    |
| ENSMUSG00000014195 | 2328 Dnajc7   |
| ENSMUSG00000070738 | 2329 Dgkd     |
| ENSMUSG00000029186 | 2330 Pi4k2b   |
| ENSMUSG00000024533 | 2331 Spire1   |
| ENSMUSG00000032038 | 2332 St3gal4  |
| ENSMUSG00000005148 | 2333 Klf5     |
| ENSMUSG00000036398 | 2334 Ppp1r11  |
| ENSMUSG00000031585 | 2335 Gtf2e2   |
| ENSMUSG00000064030 | 2336 Pym1     |
| ENSMUSG00000057541 | 2337 Pus7     |
| ENSMUSG00000020238 | 2338 Ncln     |
| ENSMUSG00000044709 | 2339 Gemin7   |
| ENSMUSG00000074852 | 2340 Hpse2    |
| ENSMUSG00000040242 | 2341 Fgfr1op2 |
| ENSMUSG00000001127 | 2342 Araf     |
| ENSMUSG00000031591 | 2343 Asah1    |
| ENSMUSG00000027384 | 2344 Ndufaf5  |
| ENSMUSG00000063019 | 2345 Manbal   |
| ENSMUSG00000003235 | 2346 Eif2b5   |
| ENSMUSG00000046668 | 2347 Cxxc5    |
| ENSMUSG00000023845 | 2348 Lnpep    |
| ENSMUSG00000031095 | 2349 Cul4b    |
| ENSMUSG00000036352 | 2350 Ubac1    |



|                    |                    |
|--------------------|--------------------|
| ENSMUSG00000059060 | 2351 Rad51b        |
| ENSMUSG00000038954 | 2352 Supt3         |
| ENSMUSG00000037119 | 2353 D15Ertd621e   |
| ENSMUSG00000024847 | 2354 Aip           |
| ENSMUSG00000028487 | 2355 Bnc2          |
| ENSMUSG00000041084 | 2356 Ostc          |
| ENSMUSG00000027479 | 2357 Mapre1        |
| ENSMUSG00000024560 | 2358 Cxxc1         |
| ENSMUSG00000015341 | 2359 Golga7        |
| ENSMUSG00000035901 | 2360 Dennd5a       |
| ENSMUSG00000061232 | 2361 H2-K1         |
| ENSMUSG00000026116 | 2362 Tmem131       |
| ENSMUSG00000043733 | 2363 Ptpn11        |
| ENSMUSG00000019951 | 2364 Uhrf1bp1l     |
| ENSMUSG00000024805 | 2365 Pcgf5         |
| ENSMUSG00000021710 | 2366 Nln           |
| ENSMUSG00000019433 | 2367 Gipc1         |
| ENSMUSG00000028309 | 2368 Rnf20         |
| ENSMUSG00000031392 | 2369 Irak1         |
| ENSMUSG00000035770 | 2370 Dync1li2      |
| ENSMUSG00000031592 | 2371 Pcm1          |
| ENSMUSG00000027333 | 2372 Smox          |
| ENSMUSG00000025724 | 2373 Sec11a        |
| ENSMUSG00000039262 | 2374 Prrc2b        |
| ENSMUSG00000042709 | 2375 Atpaf2        |
| ENSMUSG00000010277 | 2376 2610507B11Rik |
| ENSMUSG00000063296 | 2377 Tmem117       |
| ENSMUSG00000026142 | 2378 Rhbdd1        |
| ENSMUSG00000098760 | 2379 Gm27247       |
| ENSMUSG00000063902 | 2380 Gm7964        |
| ENSMUSG00000057666 | 2381 Gapdh         |
| ENSMUSG00000034993 | 2382 Vat1          |
| ENSMUSG00000020015 | 2383 Cdk17         |
| ENSMUSG00000030750 | 2384 Nsmce1        |
| ENSMUSG00000056999 | 2385 Ide           |
| ENSMUSG00000060438 | 2386 Rps10-ps1     |
| ENSMUSG00000022377 | 2387 Asap1         |
| ENSMUSG00000064289 | 2388 Tank          |
| ENSMUSG00000051510 | 2389 Mafg          |
| ENSMUSG00000039156 | 2390 Stim2         |
| ENSMUSG00000025133 | 2391 Ints4         |
| ENSMUSG00000052752 | 2392 Traf7         |

|                    |               |
|--------------------|---------------|
| ENSMUSG00000028364 | 2393 Tnc      |
| ENSMUSG00000037260 | 2394 Hgsnat   |
| ENSMUSG00000001542 | 2395 Ell2     |
| ENSMUSG00000008398 | 2396 Elk3     |
| ENSMUSG00000017548 | 2397 Suz12    |
| ENSMUSG00000031715 | 2398 Smarca5  |
| ENSMUSG00000036315 | 2399 Znrd1    |
| ENSMUSG00000024290 | 2400 Rock1    |
| ENSMUSG00000026878 | 2401 Rab14    |
| ENSMUSG00000026439 | 2402 Rbbp5    |
| ENSMUSG00000010453 | 2403 Kansl3   |
| ENSMUSG00000028843 | 2404 Sh3bgrl3 |
| ENSMUSG00000014355 | 2405 Anapc1   |
| ENSMUSG00000025816 | 2406 Sec61a2  |
| ENSMUSG00000046756 | 2407 Mrps7    |
| ENSMUSG00000006095 | 2408 Tbc1     |
| ENSMUSG00000029617 | 2409 Ccz1     |
| ENSMUSG00000002981 | 2410 Clptm1   |
| ENSMUSG00000020114 | 2411 Cand1    |
| ENSMUSG00000047832 | 2412 Cdca4    |
| ENSMUSG00000020647 | 2413 Ncoa1    |
| ENSMUSG00000071379 | 2414 Hpcal1   |
| ENSMUSG00000020128 | 2415 Vps54    |
| ENSMUSG00000024566 | 2416 Atp9b    |
| ENSMUSG00000008658 | 2417 Rbfox1   |
| ENSMUSG00000028207 | 2418 Asph     |
| ENSMUSG00000086791 | 2419 Gm12147  |
| ENSMUSG00000020704 | 2420 Asic2    |
| ENSMUSG00000024436 | 2421 Mrps18b  |
| ENSMUSG00000033106 | 2422 Slc7a6os |
| ENSMUSG00000038160 | 2423 Atg5     |
| ENSMUSG00000065126 | 2424 Snord104 |
| ENSMUSG00000042305 | 2425 Tmem183a |
| ENSMUSG00000027365 | 2426 Trpm7    |
| ENSMUSG00000080875 | 2427 Gm7332   |
| ENSMUSG00000040118 | 2428 Cacna2d1 |
| ENSMUSG00000021820 | 2429 Camk2g   |
| ENSMUSG00000078941 | 2430 Ak6      |
| ENSMUSG00000044337 | 2431 Ackr3    |
| ENSMUSG00000030245 | 2432 Golt1b   |
| ENSMUSG00000018509 | 2433 Cenpv    |
| ENSMUSG00000049090 | 2434 Zadh2    |

|                    |                    |
|--------------------|--------------------|
| ENSMUSG00000029191 | 2435 Rfc1          |
| ENSMUSG00000002804 | 2436 Nudt14        |
| ENSMUSG00000092247 | 2437 Gm20426       |
| ENSMUSG00000039275 | 2438 Foxk2         |
| ENSMUSG00000013822 | 2439 Elof1         |
| ENSMUSG00000031119 | 2440 Gpc4          |
| ENSMUSG00000022500 | 2441 Litaf         |
| ENSMUSG00000078440 | 2442 Dohh          |
| ENSMUSG00000015748 | 2443 Prpf3         |
| ENSMUSG00000066306 | 2444 Numa1         |
| ENSMUSG00000019854 | 2445 Repl1         |
| ENSMUSG00000094518 | 2446 Gm6421        |
| ENSMUSG00000052151 | 2447 Ppap2c        |
| ENSMUSG00000042772 | 2448 Smg7          |
| ENSMUSG00000060923 | 2449 Acyp2         |
| ENSMUSG00000028998 | 2450 Tomm7         |
| ENSMUSG00000004929 | 2451 Thop1         |
| ENSMUSG00000041632 | 2452 Mrps27        |
| ENSMUSG00000031134 | 2453 RbmX          |
| ENSMUSG00000032604 | 2454 Qars          |
| ENSMUSG00000038335 | 2455 Tsr1          |
| ENSMUSG00000008393 | 2456 Carhsp1       |
| ENSMUSG00000028292 | 2457 Rars2         |
| ENSMUSG00000020018 | 2458 Snrpf         |
| ENSMUSG00000001674 | 2459 Ddx18         |
| ENSMUSG00000031562 | 2460 Dctd          |
| ENSMUSG00000002844 | 2461 Adprh         |
| ENSMUSG00000040084 | 2462 Bub1b         |
| ENSMUSG00000055612 | 2463 Cdca7         |
| ENSMUSG00000023118 | 2464 Sympk         |
| ENSMUSG00000073147 | 2465 5031425E22Rik |
| ENSMUSG00000023977 | 2466 Ubr2          |
| ENSMUSG00000034163 | 2467 Zfc3h1        |
| ENSMUSG00000067194 | 2468 Eif1ax        |
| ENSMUSG00000007670 | 2469 Khshp         |
| ENSMUSG00000062169 | 2470 Cnih4         |
| ENSMUSG00000028274 | 2471 Rngtt         |
| ENSMUSG00000041879 | 2472 Ipo9          |
| ENSMUSG00000029090 | 2473 Adgra3        |
| ENSMUSG00000036893 | 2474 Ehmt1         |
| ENSMUSG00000026111 | 2475 Unc50         |
| ENSMUSG00000020257 | 2476 Wdr82         |

|                    |                    |
|--------------------|--------------------|
| ENSMUSG00000031879 | 2477 Fam96b        |
| ENSMUSG00000075284 | 2478 Wipf1         |
| ENSMUSG00000029106 | 2479 Add1          |
| ENSMUSG00000021018 | 2480 Polr2h        |
| ENSMUSG00000024234 | 2481 Mtpap         |
| ENSMUSG00000013736 | 2482 Trnt1         |
| ENSMUSG00000029550 | 2483 Sppl3         |
| ENSMUSG00000021589 | 2484 Rhobtb3       |
| ENSMUSG00000025436 | 2485 Xrcc6bp1      |
| ENSMUSG00000062683 | 2486 Atp5g2        |
| ENSMUSG00000026202 | 2487 Tuba4a        |
| ENSMUSG00000031711 | 2488 Zfp330        |
| ENSMUSG00000027751 | 2489 Supt20        |
| ENSMUSG00000030086 | 2490 Chchd6        |
| ENSMUSG00000006390 | 2491 Elovl1        |
| ENSMUSG00000022350 | 2492 E430025E21Rik |
| ENSMUSG00000040550 | 2493 Otud6b        |
| ENSMUSG00000042396 | 2494 Rbm7          |
| ENSMUSG00000002319 | 2495 Ipo4          |
| ENSMUSG00000008690 | 2496 Ncaph2        |
| ENSMUSG00000021276 | 2497 Cinp          |
| ENSMUSG00000023826 | 2498 Park2         |
| ENSMUSG00000059811 | 2499 Atf2          |
| ENSMUSG00000028948 | 2500 Nol9          |
| ENSMUSG00000022407 | 2501 Adsl          |
| ENSMUSG00000078532 | 2502 Nkain1        |
| ENSMUSG00000038374 | 2503 Rbm8a         |
| ENSMUSG00000005034 | 2504 Prkacb        |
| ENSMUSG00000028018 | 2505 Gstdc         |
| ENSMUSG00000029446 | 2506 PspH          |
| ENSMUSG00000044948 | 2507 Cfap43        |
| ENSMUSG00000021244 | 2508 Ylpm1         |
| ENSMUSG00000035958 | 2509 Tdp2          |
| ENSMUSG00000031875 | 2510 Cmtm3         |
| ENSMUSG00000029621 | 2511 Arpc1a        |
| ENSMUSG00000025173 | 2512 Wdr45b        |
| ENSMUSG00000022365 | 2513 Derl1         |
| ENSMUSG00000041278 | 2514 Ttc1          |
| ENSMUSG00000036572 | 2515 Upf3b         |
| ENSMUSG00000052738 | 2516 Suclg1        |
| ENSMUSG00000052889 | 2517 Prkcb         |
| ENSMUSG00000023932 | 2518 Cdc5l         |

|                     |                 |
|---------------------|-----------------|
| ENSMUSG00000003437  | 2519 Paf1       |
| ENSMUSG000000047712 | 2520 Ust        |
| ENSMUSG000000042605 | 2521 Atxn2      |
| ENSMUSG000000025940 | 2522 Tmem70     |
| ENSMUSG000000029647 | 2523 Pan3       |
| ENSMUSG000000057388 | 2524 Mrpl18     |
| ENSMUSG000000035354 | 2525 Uvrag      |
| ENSMUSG000000028889 | 2526 Yrdc       |
| ENSMUSG000000032937 | 2527 Fshr       |
| ENSMUSG000000001333 | 2528 Sync       |
| ENSMUSG000000046982 | 2529 Tshz1      |
| ENSMUSG000000043207 | 2530 Zmpste24   |
| ENSMUSG000000027011 | 2531 Ube2e3     |
| ENSMUSG000000038388 | 2532 Mpp6       |
| ENSMUSG000000068735 | 2533 Trp53i11   |
| ENSMUSG000000022322 | 2534 Shcbp1     |
| ENSMUSG000000029913 | 2535 Prdm5      |
| ENSMUSG000000041297 | 2536 Cdk13      |
| ENSMUSG000000019189 | 2537 Rnf145     |
| ENSMUSG000000057335 | 2538 Cep170     |
| ENSMUSG000000028556 | 2539 Dock7      |
| ENSMUSG000000027357 | 2540 Crls1      |
| ENSMUSG000000024212 | 2541 Mllt1      |
| ENSMUSG000000031516 | 2542 Dctn6      |
| ENSMUSG000000024382 | 2543 Ercc3      |
| ENSMUSG000000020918 | 2544 Kat2a      |
| ENSMUSG000000021051 | 2545 Ppp2r5e    |
| ENSMUSG000000024400 | 2546 Wdr33      |
| ENSMUSG000000023723 | 2547 Mrps23     |
| ENSMUSG000000069744 | 2548 Psmb3      |
| ENSMUSG000000035443 | 2549 Thyn1      |
| ENSMUSG000000031532 | 2550 Saraf      |
| ENSMUSG000000020255 | 2551 D10Wsu102e |
| ENSMUSG000000034254 | 2552 Agpat1     |
| ENSMUSG000000027074 | 2553 Slc43a3    |
| ENSMUSG000000002997 | 2554 Prkar2b    |
| ENSMUSG000000025240 | 2555 Sacm1l     |
| ENSMUSG000000025034 | 2556 Trim8      |
| ENSMUSG000000038132 | 2557 Rbm24      |
| ENSMUSG000000056342 | 2558 Usp34      |
| ENSMUSG000000002812 | 2559 Flii       |
| ENSMUSG000000022800 | 2560 Fyttd1     |

|                    |                    |
|--------------------|--------------------|
| ENSMUSG00000091478 | 2561 Gm10039       |
| ENSMUSG00000027502 | 2562 Rtfdc1        |
| ENSMUSG00000038683 | 2563 Pak1ip1       |
| ENSMUSG00000015312 | 2564 Gadd45b       |
| ENSMUSG00000021745 | 2565 Ptprg         |
| ENSMUSG00000024146 | 2566 Cript         |
| ENSMUSG00000047466 | 2567 8030462N17Rik |
| ENSMUSG00000067028 | 2568 Cntnap5b      |
| ENSMUSG00000033706 | 2569 Smyd5         |
| ENSMUSG00000019710 | 2570 Mrpl24        |
| ENSMUSG00000020694 | 2571 Tlk2          |
| ENSMUSG00000039536 | 2572 Stau1         |
| ENSMUSG00000003778 | 2573 Brd8          |
| ENSMUSG00000059974 | 2574 Ntm           |
| ENSMUSG00000019873 | 2575 Reep3         |
| ENSMUSG00000051255 | 2576 Gm6563        |
| ENSMUSG00000043252 | 2577 Tmem64        |
| ENSMUSG00000006715 | 2578 Gmnn          |
| ENSMUSG00000022306 | 2579 Zfpm2         |
| ENSMUSG00000064634 | 2580 Gm22620       |
| ENSMUSG00000027109 | 2581 Sp3           |
| ENSMUSG00000040774 | 2582 Cept1         |
| ENSMUSG00000034187 | 2583 Nsf           |
| ENSMUSG00000008683 | 2584 Rps15a        |
| ENSMUSG00000032570 | 2585 Atp2c1        |
| ENSMUSG00000106326 | 2586 Gm42977       |
| ENSMUSG00000039230 | 2587 Tbcd          |
| ENSMUSG00000104960 | 2588 Snhg8         |
| ENSMUSG00000031770 | 2589 Herpud1       |
| ENSMUSG00000001750 | 2590 Tcirg1        |
| ENSMUSG00000021951 | 2591 N6amt2        |
| ENSMUSG00000059288 | 2592 Cdyl          |
| ENSMUSG00000061315 | 2593 Naca          |
| ENSMUSG00000027198 | 2594 Ext2          |
| ENSMUSG00000027499 | 2595 Pkia          |
| ENSMUSG00000001403 | 2596 Ube2c         |
| ENSMUSG00000061130 | 2597 Ppm1b         |
| ENSMUSG00000061143 | 2598 Maml3         |
| ENSMUSG00000052033 | 2599 Pfdn4         |
| ENSMUSG00000017686 | 2600 Rhot1         |
| ENSMUSG00000062456 | 2601 Rpl9-ps6      |
| ENSMUSG00000033420 | 2602 Antxr1        |

|                     |               |
|---------------------|---------------|
| ENSMUSG00000025981  | 2603 Coq10b   |
| ENSMUSG00000028563  | 2604 Tm2d1    |
| ENSMUSG00000032046  | 2605 Abhd12   |
| ENSMUSG00000028821  | 2606 Syf2     |
| ENSMUSG00000017176  | 2607 Nt5c3b   |
| ENSMUSG00000039178  | 2608 Tbc1d19  |
| ENSMUSG00000078488  | 2609 Gm10945  |
| ENSMUSG00000006169  | 2610 Clint1   |
| ENSMUSG00000027937  | 2611 Jtb      |
| ENSMUSG00000029439  | 2612 Sfswap   |
| ENSMUSG00000005813  | 2613 Metap1   |
| ENSMUSG00000008384  | 2614 Sertad1  |
| ENSMUSG000000048332 | 2615 Lhfp     |
| ENSMUSG000000040738 | 2616 Ints8    |
| ENSMUSG00000026034  | 2617 Clk1     |
| ENSMUSG000000038563 | 2618 Eftud1   |
| ENSMUSG000000035960 | 2619 Apex1    |
| ENSMUSG000000030726 | 2620 Pold3    |
| ENSMUSG000000036299 | 2621 BC031181 |
| ENSMUSG00000028736  | 2622 Pax7     |
| ENSMUSG00000024896  | 2623 Minpp1   |
| ENSMUSG00000022781  | 2624 Pak2     |
| ENSMUSG000000032340 | 2625 Neo1     |
| ENSMUSG000000044475 | 2626 Ascc1    |
| ENSMUSG00000024982  | 2627 Zdhhc6   |
| ENSMUSG00000020514  | 2628 Mrpl22   |
| ENSMUSG000000034274 | 2629 Thoc5    |
| ENSMUSG000000046364 | 2630 Rpl27a   |
| ENSMUSG00000020393  | 2631 Kremen1  |
| ENSMUSG000000031627 | 2632 Irf2     |
| ENSMUSG000000003813 | 2633 Rad23a   |
| ENSMUSG00000024095  | 2634 Hnrnp1l  |
| ENSMUSG00000024952  | 2635 Rps6ka4  |
| ENSMUSG000000040414 | 2636 Slc25a28 |
| ENSMUSG00000027185  | 2637 Nat10    |
| ENSMUSG00000007050  | 2638 Lsm2     |
| ENSMUSG000000035621 | 2639 Midn     |
| ENSMUSG000000031987 | 2640 Egl1     |
| ENSMUSG00000021715  | 2641 Cwc27    |
| ENSMUSG000000031636 | 2642 Pdlim3   |
| ENSMUSG00000026950  | 2643 Neb      |
| ENSMUSG00000009214  | 2644 Tmem8c   |

|                     |                    |
|---------------------|--------------------|
| ENSMUSG00000025920  | 2645 Stau2         |
| ENSMUSG00000020477  | 2646 Mrps24        |
| ENSMUSG00000031146  | 2647 Plp2          |
| ENSMUSG00000031357  | 2648 Syap1         |
| ENSMUSG00000019969  | 2649 Psen1         |
| ENSMUSG00000006676  | 2650 Usp19         |
| ENSMUSG00000031375  | 2651 Bgn           |
| ENSMUSG00000021241  | 2652 Isca2         |
| ENSMUSG00000029128  | 2653 Rab28         |
| ENSMUSG00000027104  | 2654 Atf2          |
| ENSMUSG00000026842  | 2655 Abl1          |
| ENSMUSG00000030079  | 2656 Ruvbl1        |
| ENSMUSG00000027879  | 2657 Sec22b        |
| ENSMUSG00000021810  | 2658 Ecd           |
| ENSMUSG00000050299  | 2659 Gm9843        |
| ENSMUSG000000103655 | 2660 Gm37202       |
| ENSMUSG00000008200  | 2661 Fnbp4         |
| ENSMUSG00000022325  | 2662 Pop1          |
| ENSMUSG00000034612  | 2663 Chst11        |
| ENSMUSG00000020864  | 2664 Ankrd40       |
| ENSMUSG00000035828  | 2665 Pim3          |
| ENSMUSG00000021892  | 2666 Sh3bp5        |
| ENSMUSG00000032035  | 2667 Ets1          |
| ENSMUSG00000019868  | 2668 Vta1          |
| ENSMUSG00000012405  | 2669 Rpl15         |
| ENSMUSG00000053553  | 2670 3110082I17Rik |
| ENSMUSG00000026504  | 2671 Sdccag8       |
| ENSMUSG00000026153  | 2672 Fam135a       |
| ENSMUSG00000080316  | 2673 Spaca6        |
| ENSMUSG00000025616  | 2674 Usp16         |
| ENSMUSG00000002833  | 2675 Hdgfrp2       |
| ENSMUSG00000035674  | 2676 Ndufa3        |
| ENSMUSG00000082286  | 2677 Pisd-ps1      |
| ENSMUSG00000025224  | 2678 Gbf1          |
| ENSMUSG00000024260  | 2679 Sap130        |
| ENSMUSG00000023021  | 2680 Cers5         |
| ENSMUSG00000037313  | 2681 Tacc3         |
| ENSMUSG00000035342  | 2682 Lzts2         |
| ENSMUSG00000028514  | 2683 Usp24         |
| ENSMUSG00000017843  | 2684 Ppp2r5c       |
| ENSMUSG00000066551  | 2685 Hmgbl         |
| ENSMUSG00000024683  | 2686 Mrpl16        |



|                    |               |
|--------------------|---------------|
| ENSMUSG00000065979 | 2687 Cpped1   |
| ENSMUSG00000041130 | 2688 Zfp598   |
| ENSMUSG00000034903 | 2689 Cobll1   |
| ENSMUSG00000035299 | 2690 Mid1     |
| ENSMUSG00000036529 | 2691 Sbf1     |
| ENSMUSG00000035133 | 2692 Arhgap5  |
| ENSMUSG00000026566 | 2693 Mpzl1    |
| ENSMUSG00000022677 | 2694 Fopnl    |
| ENSMUSG00000017615 | 2695 Tnfaip1  |
| ENSMUSG00000025532 | 2696 Crcp     |
| ENSMUSG00000022844 | 2697 Pdia5    |
| ENSMUSG00000030417 | 2698 Pdcd5    |
| ENSMUSG00000017404 | 2699 Rpl19    |
| ENSMUSG00000056486 | 2700 Chn1     |
| ENSMUSG00000052296 | 2701 Ppp6r1   |
| ENSMUSG00000000435 | 2702 Myf5     |
| ENSMUSG00000033752 | 2703 Mnd1     |
| ENSMUSG00000068040 | 2704 Tm9sf4   |
| ENSMUSG00000001052 | 2705 Sec24b   |
| ENSMUSG00000027122 | 2706 Arl14ep  |
| ENSMUSG00000074269 | 2707 Rec114   |
| ENSMUSG00000066406 | 2708 Akap13   |
| ENSMUSG00000047921 | 2709 Trappc9  |
| ENSMUSG00000033216 | 2710 Eefsec   |
| ENSMUSG00000041840 | 2711 Haus1    |
| ENSMUSG00000086756 | 2712 Gm14051  |
| ENSMUSG00000004895 | 2713 Prcc     |
| ENSMUSG00000025232 | 2714 Hexa     |
| ENSMUSG00000066036 | 2715 Ubr4     |
| ENSMUSG00000038347 | 2716 Tcte2    |
| ENSMUSG00000040521 | 2717 Tsfm     |
| ENSMUSG00000012443 | 2718 Kif11    |
| ENSMUSG00000057554 | 2719 Lgals8   |
| ENSMUSG00000021693 | 2720 Kif2a    |
| ENSMUSG00000024240 | 2721 Epc1     |
| ENSMUSG00000086157 | 2722 Gm14643  |
| ENSMUSG00000025413 | 2723 Ttc4     |
| ENSMUSG00000040506 | 2724 Ambra1   |
| ENSMUSG00000003200 | 2725 Sh3gl1   |
| ENSMUSG00000024188 | 2726 Luc7l    |
| ENSMUSG00000042590 | 2727 lpo11    |
| ENSMUSG00000026490 | 2728 Cdc42bpa |

|                     |                    |
|---------------------|--------------------|
| ENSMUSG00000001844  | 2729 Zdhhc4        |
| ENSMUSG000000035933 | 2730 Cog5          |
| ENSMUSG00000001910  | 2731 Nacc1         |
| ENSMUSG000000079024 | 2732 Gm21961       |
| ENSMUSG000000058230 | 2733 Arhgap35      |
| ENSMUSG000000028140 | 2734 Mrpl9         |
| ENSMUSG000000020523 | 2735 Fam114a2      |
| ENSMUSG000000066877 | 2736 Nck2          |
| ENSMUSG000000027327 | 2737 1700037H04Rik |
| ENSMUSG000000030353 | 2738 Tead4         |
| ENSMUSG000000029265 | 2739 Dr1           |
| ENSMUSG000000058440 | 2740 Nrf1          |
| ENSMUSG000000037669 | 2741 Ldah          |
| ENSMUSG000000047821 | 2742 Trim16        |
| ENSMUSG000000027944 | 2743 Hax1          |
| ENSMUSG000000021607 | 2744 Mrpl36        |
| ENSMUSG000000055553 | 2745 Kxd1          |
| ENSMUSG000000027176 | 2746 Cstf3         |
| ENSMUSG000000032299 | 2747 Commd4        |
| ENSMUSG000000034075 | 2748 Zdhhc5        |
| ENSMUSG00000000441  | 2749 Raf1          |
| ENSMUSG000000004591 | 2750 Pkn2          |
| ENSMUSG000000038622 | 2751 Med30         |
| ENSMUSG000000061689 | 2752 Dlgap4        |
| ENSMUSG000000027189 | 2753 Trim44        |
| ENSMUSG000000030029 | 2754 Lrig1         |
| ENSMUSG000000025935 | 2755 Tram1         |
| ENSMUSG000000024420 | 2756 Zfp521        |
| ENSMUSG000000021494 | 2757 Ddx41         |
| ENSMUSG000000032058 | 2758 Ppp2r1b       |
| ENSMUSG000000024165 | 2759 Hn1l          |
| ENSMUSG000000027752 | 2760 Exosc8        |
| ENSMUSG000000031620 | 2761 1700007B14Rik |
| ENSMUSG000000002320 | 2762 Tm9sf1        |
| ENSMUSG000000037710 | 2763 Cisd1         |
| ENSMUSG000000099875 | 2764 Gm15453       |
| ENSMUSG000000002129 | 2765 Sf3a1         |
| ENSMUSG000000026966 | 2766 Ssna1         |
| ENSMUSG000000021115 | 2767 Vrk1          |
| ENSMUSG000000001419 | 2768 Mef2d         |
| ENSMUSG000000031660 | 2769 Brd7          |
| ENSMUSG000000025041 | 2770 Nt5c2         |

|                    |              |
|--------------------|--------------|
| ENSMUSG00000078566 | 2771 Bnip3   |
| ENSMUSG00000022995 | 2772 Enah    |
| ENSMUSG00000024083 | 2773 Pja2    |
| ENSMUSG00000043556 | 2774 Fbxl7   |
| ENSMUSG00000023272 | 2775 Creld2  |
| ENSMUSG00000031309 | 2776 Rps6ka3 |
| ENSMUSG00000037210 | 2777 Fam193a |
| ENSMUSG00000101249 | 2778 Gm29216 |
| ENSMUSG00000034390 | 2779 Cmip    |
| ENSMUSG00000026426 | 2780 Arl8a   |
| ENSMUSG00000034109 | 2781 Golim4  |
| ENSMUSG00000024231 | 2782 Cul2    |
| ENSMUSG00000027496 | 2783 Aurka   |
| ENSMUSG00000049354 | 2784 Dcaf7   |
| ENSMUSG00000026977 | 2785 7-Mar   |
| ENSMUSG00000024222 | 2786 Fkbp5   |
| ENSMUSG00000031546 | 2787 Gins4   |
| ENSMUSG00000034021 | 2788 Pds5b   |
| ENSMUSG00000024833 | 2789 Pola2   |
| ENSMUSG00000042548 | 2790 Asxl1   |
| ENSMUSG00000008976 | 2791 Gabpa   |
| ENSMUSG00000027395 | 2792 Polr1b  |
| ENSMUSG00000017188 | 2793 Coa3    |
| ENSMUSG00000039804 | 2794 Ncoa5   |
| ENSMUSG00000020385 | 2795 Clk4    |
| ENSMUSG00000013858 | 2796 Tmem259 |
| ENSMUSG00000052488 | 2797 Cherp   |
| ENSMUSG00000033306 | 2798 Lpp     |
| ENSMUSG00000026670 | 2799 Uap1    |
| ENSMUSG00000067787 | 2800 Blcap   |
| ENSMUSG00000009566 | 2801 Fpgs    |
| ENSMUSG00000020354 | 2802 Sgcd    |
| ENSMUSG00000025223 | 2803 Ldb1    |
| ENSMUSG00000044502 | 2804 Bod1    |
| ENSMUSG00000039844 | 2805 Rapgef1 |
| ENSMUSG00000030471 | 2806 Zdhhc13 |
| ENSMUSG00000031729 | 2807 Ist1    |
| ENSMUSG00000053560 | 2808 Ier2    |
| ENSMUSG00000025225 | 2809 Nfkb2   |
| ENSMUSG00000041781 | 2810 Cpsf2   |
| ENSMUSG00000003119 | 2811 Cdk12   |
| ENSMUSG00000007880 | 2812 Arid1a  |

|                    |                    |
|--------------------|--------------------|
| ENSMUSG00000028622 | 2813 Mrpl37        |
| ENSMUSG00000059203 | 2814 Il1rapl2      |
| ENSMUSG00000021629 | 2815 Slc30a5       |
| ENSMUSG00000039488 | 2816 Cntn5         |
| ENSMUSG00000023015 | 2817 Racgap1       |
| ENSMUSG00000026743 | 2818 Mllt10        |
| ENSMUSG00000021039 | 2819 Snw1          |
| ENSMUSG00000036890 | 2820 Gtdc1         |
| ENSMUSG00000024735 | 2821 Prpf19        |
| ENSMUSG00000022972 | 2822 1110004E09Rik |
| ENSMUSG00000011877 | 2823 Git1          |
| ENSMUSG00000019188 | 2824 H13           |
| ENSMUSG00000045665 | 2825 Mfsd5         |
| ENSMUSG00000022186 | 2826 Oxct1         |
| ENSMUSG00000020908 | 2827 Myh3          |
| ENSMUSG00000036916 | 2828 Zfp280c       |
| ENSMUSG00000094344 | 2829 Gm11942       |
| ENSMUSG00000024135 | 2830 Srbd1         |
| ENSMUSG00000085476 | 2831 Gm12162       |
| ENSMUSG00000030002 | 2832 Dusp11        |
| ENSMUSG00000069601 | 2833 Ank3          |
| ENSMUSG00000017778 | 2834 Cox7c         |
| ENSMUSG00000039693 | 2835 Msantd3       |
| ENSMUSG00000034593 | 2836 Myo5a         |
| ENSMUSG00000032239 | 2837 Rp9           |
| ENSMUSG00000032436 | 2838 Cmtm7         |
| ENSMUSG00000027030 | 2839 Stk39         |
| ENSMUSG00000074476 | 2840 Spc24         |
| ENSMUSG00000047423 | 2841 Al837181      |
| ENSMUSG00000033917 | 2842 Gde1          |
| ENSMUSG00000034928 | 2843 Rnf44         |
| ENSMUSG00000073411 | 2844 H2-D1         |
| ENSMUSG00000032312 | 2845 Csk           |
| ENSMUSG00000025790 | 2846 Slco3a1       |
| ENSMUSG00000024043 | 2847 Arhgap28      |
| ENSMUSG00000065265 | 2848 Gm23455       |
| ENSMUSG00000063785 | 2849 Utp14a        |
| ENSMUSG00000067288 | 2850 Rps28         |
| ENSMUSG00000038718 | 2851 Pbx3          |
| ENSMUSG00000015002 | 2852 Efr3a         |
| ENSMUSG00000029684 | 2853 Wasl          |
| ENSMUSG00000025001 | 2854 Hells         |

|                    |                    |
|--------------------|--------------------|
| ENSMUSG00000053841 | 2855 Txlna         |
| ENSMUSG00000033444 | 2856 Specc1l       |
| ENSMUSG00000022718 | 2857 Dgcr8         |
| ENSMUSG00000027472 | 2858 Pdrg1         |
| ENSMUSG00000024081 | 2859 Cebpz         |
| ENSMUSG00000061111 | 2860 Fam195b       |
| ENSMUSG00000030123 | 2861 Plxnd1        |
| ENSMUSG00000055720 | 2862 Ubl7          |
| ENSMUSG00000056537 | 2863 Rlim          |
| ENSMUSG00000033272 | 2864 Slc35a4       |
| ENSMUSG00000027014 | 2865 Cwc22         |
| ENSMUSG00000022895 | 2866 Ets2          |
| ENSMUSG00000057177 | 2867 Gsk3a         |
| ENSMUSG00000033487 | 2868 Fndc3a        |
| ENSMUSG00000020042 | 2869 Btbd11        |
| ENSMUSG00000025204 | 2870 Ndufb8        |
| ENSMUSG00000049439 | 2871 Cyp20a1       |
| ENSMUSG00000022704 | 2872 Qtrtd1        |
| ENSMUSG00000037606 | 2873 Osbp15        |
| ENSMUSG00000058558 | 2874 Rpl5          |
| ENSMUSG00000027177 | 2875 Hipk3         |
| ENSMUSG00000022205 | 2876 Sub1          |
| ENSMUSG00000034560 | 2877 A230046K03Rik |
| ENSMUSG00000024900 | 2878 Cpt1a         |
| ENSMUSG00000032431 | 2879 Crtap         |
| ENSMUSG00000035597 | 2880 Prpf39        |
| ENSMUSG00000017831 | 2881 Rab5a         |
| ENSMUSG00000033379 | 2882 Atp6v0b       |
| ENSMUSG00000027016 | 2883 Zfp385b       |
| ENSMUSG00000075706 | 2884 Gpx4          |
| ENSMUSG00000023025 | 2885 Larp4         |
| ENSMUSG00000005882 | 2886 Uqcc1         |
| ENSMUSG00000039137 | 2887 Whrn          |
| ENSMUSG00000025979 | 2888 Mob4          |
| ENSMUSG00000026278 | 2889 Bok           |
| ENSMUSG00000061665 | 2890 Cd2ap         |
| ENSMUSG00000030188 | 2891 Magohb        |
| ENSMUSG00000087260 | 2892 Lamtor5       |
| ENSMUSG00000085875 | 2893 Gm12905       |
| ENSMUSG00000023020 | 2894 Cox14         |
| ENSMUSG00000035372 | 2895 1810055G02Rik |
| ENSMUSG00000030084 | 2896 Plxna1        |

|                    |               |
|--------------------|---------------|
| ENSMUSG00000021557 | 2897 Agtpbp1  |
| ENSMUSG00000039953 | 2898 Clstn1   |
| ENSMUSG00000040274 | 2899 Cdk6     |
| ENSMUSG00000054611 | 2900 Kdm2a    |
| ENSMUSG00000023092 | 2901 Fhl1     |
| ENSMUSG00000039768 | 2902 Dnajc11  |
| ENSMUSG00000056211 | 2903 R3hdm1   |
| ENSMUSG00000001445 | 2904 Mrpl10   |
| ENSMUSG00000014748 | 2905 Tex261   |
| ENSMUSG00000050587 | 2906 Lrrc4c   |
| ENSMUSG00000019254 | 2907 Ppp1r12c |
| ENSMUSG00000070426 | 2908 Rnf121   |
| ENSMUSG00000018433 | 2909 Nol11    |
| ENSMUSG00000013787 | 2910 Ehmt2    |
| ENSMUSG00000027699 | 2911 Ect2     |
| ENSMUSG00000027099 | 2912 Mtx2     |
| ENSMUSG00000033530 | 2913 Ttc7b    |
| ENSMUSG00000029310 | 2914 Nudt9    |
| ENSMUSG00000035762 | 2915 Tmem161b |
| ENSMUSG00000018974 | 2916 Sart3    |
| ENSMUSG00000033294 | 2917 Noc4l    |
| ENSMUSG00000063873 | 2918 Slc24a3  |
| ENSMUSG00000038387 | 2919 Rras     |
| ENSMUSG00000040813 | 2920 Tex264   |
| ENSMUSG00000001911 | 2921 Nfix     |
| ENSMUSG00000032217 | 2922 Rnf111   |
| ENSMUSG00000031634 | 2923 Ufsp2    |
| ENSMUSG00000071669 | 2924 Snx29    |
| ENSMUSG00000036748 | 2925 Cuedc2   |
| ENSMUSG00000106407 | 2926 Gm43439  |
| ENSMUSG00000064179 | 2927 Tnnt1    |
| ENSMUSG00000034707 | 2928 Gns      |
| ENSMUSG00000026761 | 2929 Orc4     |
| ENSMUSG00000052406 | 2930 Rexo4    |
| ENSMUSG00000028348 | 2931 Murc     |
| ENSMUSG00000003992 | 2932 Ssbp2    |
| ENSMUSG00000024588 | 2933 Fech     |
| ENSMUSG00000053470 | 2934 Kdm3a    |
| ENSMUSG00000064326 | 2935 Siva1    |
| ENSMUSG00000024480 | 2936 Ap3s1    |
| ENSMUSG00000033287 | 2937 Kctd17   |
| ENSMUSG00000026239 | 2938 Pde6d    |

|                     |               |
|---------------------|---------------|
| ENSMUSG00000032215  | 2939 Rsl24d1  |
| ENSMUSG00000085101  | 2940 Platr16  |
| ENSMUSG00000003269  | 2941 Cyth2    |
| ENSMUSG000000051864 | 2942 Tbc1d22a |
| ENSMUSG00000033581  | 2943 Igf2bp2  |
| ENSMUSG00000024006  | 2944 Stk38    |
| ENSMUSG00000086583  | 2945 Gm15500  |
| ENSMUSG00000032563  | 2946 Mrpl3    |
| ENSMUSG00000020677  | 2947 Ddx52    |
| ENSMUSG000000058173 | 2948 Smco4    |
| ENSMUSG00000028614  | 2949 Ndc1     |
| ENSMUSG00000039886  | 2950 Tmem120a |
| ENSMUSG00000026643  | 2951 Nmt2     |
| ENSMUSG00000031982  | 2952 Arv1     |
| ENSMUSG00000020064  | 2953 Herc4    |
| ENSMUSG00000038502  | 2954 Ptov1    |
| ENSMUSG00000025203  | 2955 Scd2     |
| ENSMUSG00000020460  | 2956 Rps27a   |
| ENSMUSG00000030888  | 2957 Rrp8     |
| ENSMUSG00000028049  | 2958 Scamp3   |
| ENSMUSG00000002957  | 2959 Ap2a2    |
| ENSMUSG00000021756  | 2960 Il6st    |
| ENSMUSG00000034327  | 2961 Kctd9    |
| ENSMUSG00000101795  | 2962 Gm5835   |
| ENSMUSG00000082454  | 2963 Gm12183  |
| ENSMUSG00000002395  | 2964 Use1     |
| ENSMUSG00000029108  | 2965 Pcdh7    |
| ENSMUSG00000031358  | 2966 Msl3     |
| ENSMUSG00000031010  | 2967 Usp9x    |
| ENSMUSG00000028397  | 2968 Kdm4c    |
| ENSMUSG00000039456  | 2969 Morc3    |
| ENSMUSG00000025977  | 2970 Boll     |
| ENSMUSG00000039202  | 2971 Abhd2    |
| ENSMUSG00000028857  | 2972 Tmem222  |
| ENSMUSG00000096210  | 2973 H1f0     |
| ENSMUSG00000035620  | 2974 Ric8b    |
| ENSMUSG00000062373  | 2975 Tmem65   |
| ENSMUSG00000030374  | 2976 Strn4    |
| ENSMUSG00000058392  | 2977 Rrp1b    |
| ENSMUSG00000030605  | 2978 Mfge8    |
| ENSMUSG00000001909  | 2979 Trmt1    |
| ENSMUSG00000004285  | 2980 Atp6v1f  |

|                    |               |
|--------------------|---------------|
| ENSMUSG00000026623 | 2981 Lpgat1   |
| ENSMUSG00000025358 | 2982 Cdk2     |
| ENSMUSG00000020211 | 2983 Sf3a2    |
| ENSMUSG00000059439 | 2984 Bcas3    |
| ENSMUSG00000022708 | 2985 Zbtb20   |
| ENSMUSG00000040028 | 2986 Elavl1   |
| ENSMUSG00000021555 | 2987 Naa35    |
| ENSMUSG00000023068 | 2988 Nus1     |
| ENSMUSG00000038290 | 2989 Smg6     |
| ENSMUSG00000020305 | 2990 Asb3     |
| ENSMUSG00000021279 | 2991 Cdc42bpb |
| ENSMUSG00000074634 | 2992 Gm7120   |
| ENSMUSG00000028552 | 2993 Eps15    |
| ENSMUSG00000030588 | 2994 Yif1b    |
| ENSMUSG00000039108 | 2995 Lsm14b   |
| ENSMUSG00000041238 | 2996 Rbbp8    |
| ENSMUSG00000036613 | 2997 Tssc1    |
| ENSMUSG00000058587 | 2998 Tmod3    |
| ENSMUSG00000090602 | 2999 Gm5611   |
| ENSMUSG00000026112 | 3000 Coa5     |
| ENSMUSG00000037343 | 3001 Taf2     |
| ENSMUSG00000029111 | 3002 Nelfa    |
| ENSMUSG00000039384 | 3003 Dusp10   |
| ENSMUSG00000051236 | 3004 Msrb3    |
| ENSMUSG00000030060 | 3005 Hmces    |
| ENSMUSG00000029227 | 3006 Fip11    |
| ENSMUSG00000038418 | 3007 Egr1     |
| ENSMUSG00000034906 | 3008 Ncaph    |
| ENSMUSG00000028960 | 3009 Ube4b    |
| ENSMUSG00000034066 | 3010 Farp2    |
| ENSMUSG00000021131 | 3011 Erh      |
| ENSMUSG00000021831 | 3012 Ero1l    |
| ENSMUSG00000015869 | 3013 Prpsap1  |
| ENSMUSG00000055707 | 3014 Klhl26   |
| ENSMUSG00000086035 | 3015 Gm12610  |
| ENSMUSG00000024780 | 3016 Cdc37l1  |
| ENSMUSG00000038644 | 3017 Pold1    |
| ENSMUSG00000022905 | 3018 Kpna1    |
| ENSMUSG00000022109 | 3019 Med4     |
| ENSMUSG00000078676 | 3020 Casc3    |
| ENSMUSG00000029176 | 3021 Anapc4   |
| ENSMUSG00000042148 | 3022 Cox10    |



|                    |                    |
|--------------------|--------------------|
| ENSMUSG00000107538 | 3023 RP23-79A7.3   |
| ENSMUSG00000002104 | 3024 Rapsn         |
| ENSMUSG00000038518 | 3025 Jarid2        |
| ENSMUSG00000020260 | 3026 Pofut2        |
| ENSMUSG00000028990 | 3027 Lzic          |
| ENSMUSG00000027552 | 3028 E2f5          |
| ENSMUSG00000027429 | 3029 Sec23b        |
| ENSMUSG00000038803 | 3030 Ost4          |
| ENSMUSG00000028284 | 3031 Map3k7        |
| ENSMUSG00000025647 | 3032 Shisa5        |
| ENSMUSG00000003464 | 3033 Pex19         |
| ENSMUSG00000043411 | 3034 Usp48         |
| ENSMUSG00000025873 | 3035 Faf2          |
| ENSMUSG00000031673 | 3036 Cdh11         |
| ENSMUSG00000030199 | 3037 Etv6          |
| ENSMUSG00000059495 | 3038 Arhgef12      |
| ENSMUSG00000020280 | 3039 Pus10         |
| ENSMUSG00000037196 | 3040 Pacrg         |
| ENSMUSG00000030682 | 3041 Cdipt         |
| ENSMUSG00000027596 | 3042 a             |
| ENSMUSG00000039831 | 3043 Arhgap29      |
| ENSMUSG00000026150 | 3044 Mff           |
| ENSMUSG00000021959 | 3045 Lats2         |
| ENSMUSG00000006050 | 3046 Sra1          |
| ENSMUSG00000020700 | 3047 Map3k3        |
| ENSMUSG00000040188 | 3048 Scamp2        |
| ENSMUSG00000097207 | 3049 6030443J06Rik |
| ENSMUSG00000024646 | 3050 Cyb5a         |
| ENSMUSG00000063904 | 3051 4930533O14Rik |
| ENSMUSG00000052707 | 3052 Tnrc6a        |
| ENSMUSG00000027864 | 3053 Ptgfrn        |
| ENSMUSG00000034154 | 3054 Ino80         |
| ENSMUSG00000029326 | 3055 Enoph1        |
| ENSMUSG00000020841 | 3056 Cpd           |
| ENSMUSG00000022000 | 3057 Zc3h13        |
| ENSMUSG00000068196 | 3058 Col8a1        |
| ENSMUSG00000021258 | 3059 Ccnk          |
| ENSMUSG00000012076 | 3060 Brms1l        |
| ENSMUSG00000032078 | 3061 Zpr1          |
| ENSMUSG00000037679 | 3062 Inf2          |
| ENSMUSG00000084808 | 3063 9430091E24Rik |
| ENSMUSG00000039068 | 3064 Zzz3          |

|                    |              |
|--------------------|--------------|
| ENSMUSG00000037935 | 3065 Smarce1 |
| ENSMUSG00000042506 | 3066 Usp22   |
| ENSMUSG00000048874 | 3067 Phf3    |
| ENSMUSG00000046798 | 3068 Cldn12  |
| ENSMUSG00000036087 | 3069 Slain2  |
| ENSMUSG00000046034 | 3070 Otulin  |
| ENSMUSG00000029432 | 3071 Gbas    |
| ENSMUSG00000047022 | 3072 Mipol1  |
| ENSMUSG00000022103 | 3073 Gfra2   |
| ENSMUSG00000018377 | 3074 Vezf1   |
| ENSMUSG00000030867 | 3075 Plk1    |
| ENSMUSG00000032737 | 3076 Inpp1   |
| ENSMUSG00000030611 | 3077 Mrps11  |
| ENSMUSG00000020840 | 3078 Blmh    |
| ENSMUSG00000032715 | 3079 Trib3   |
| ENSMUSG00000038611 | 3080 Phrf1   |
| ENSMUSG00000031563 | 3081 Wwc2    |
| ENSMUSG00000028098 | 3082 Rnf115  |
| ENSMUSG00000071359 | 3083 Tbp1    |
| ENSMUSG00000031520 | 3084 Vegfc   |
| ENSMUSG00000051768 | 3085 Xrcc1   |
| ENSMUSG00000031511 | 3086 Arhgef7 |
| ENSMUSG00000058914 | 3087 C1qtnf3 |
| ENSMUSG00000053110 | 3088 Yap1    |
| ENSMUSG00000005873 | 3089 Reep5   |
| ENSMUSG00000035545 | 3090 Leng8   |
| ENSMUSG00000021392 | 3091 Nol8    |
| ENSMUSG00000000827 | 3092 Tpd52l2 |
| ENSMUSG00000040565 | 3093 Btaf1   |
| ENSMUSG00000041733 | 3094 Coq5    |
| ENSMUSG00000022814 | 3095 Umps    |
| ENSMUSG00000046139 | 3096 Pat1    |
| ENSMUSG00000004843 | 3097 Chmp2b  |
| ENSMUSG00000001229 | 3098 Dpp9    |
| ENSMUSG00000028538 | 3099 St3gal3 |
| ENSMUSG00000000326 | 3100 Comt    |
| ENSMUSG00000049124 | 3101 Gm8186  |
| ENSMUSG00000088929 | 3102 Gm24299 |
| ENSMUSG00000027797 | 3103 Dclk1   |
| ENSMUSG00000035941 | 3104 Ibt1    |
| ENSMUSG00000040025 | 3105 Ythdf2  |
| ENSMUSG00000031700 | 3106 Gpt2    |

|                    |               |
|--------------------|---------------|
| ENSMUSG00000026421 | 3107 Csrp1    |
| ENSMUSG00000009907 | 3108 Vps4b    |
| ENSMUSG00000031681 | 3109 Smad1    |
| ENSMUSG00000028675 | 3110 Pnrc2    |
| ENSMUSG00000073702 | 3111 Rpl31    |
| ENSMUSG00000027775 | 3112 Mfsd1    |
| ENSMUSG00000035781 | 3113 R3hdm4   |
| ENSMUSG00000021650 | 3114 Ptcd2    |
| ENSMUSG00000040003 | 3115 Magi2    |
| ENSMUSG00000047649 | 3116 Cd3eap   |
| ENSMUSG00000030714 | 3117 Ccdc101  |
| ENSMUSG00000038291 | 3118 Snx25    |
| ENSMUSG00000026187 | 3119 Xrcc5    |
| ENSMUSG00000025153 | 3120 Fasn     |
| ENSMUSG00000002968 | 3121 Med25    |
| ENSMUSG00000042682 | 3122 Selk     |
| ENSMUSG00000035168 | 3123 Tanc1    |
| ENSMUSG00000071451 | 3124 Psmg4    |
| ENSMUSG00000052459 | 3125 Atp6v1a  |
| ENSMUSG00000024098 | 3126 Twsg1    |
| ENSMUSG00000030423 | 3127 Pop4     |
| ENSMUSG00000021027 | 3128 Ralgapa1 |
| ENSMUSG00000002845 | 3129 Tmem39a  |
| ENSMUSG00000018572 | 3130 Phf23    |
| ENSMUSG00000021493 | 3131 Pdlim7   |
| ENSMUSG00000025607 | 3132 Copg2    |
| ENSMUSG00000026155 | 3133 Smap1    |
| ENSMUSG00000031370 | 3134 Zrsr2    |
| ENSMUSG00000028126 | 3135 Pip5k1a  |
| ENSMUSG00000028669 | 3136 Pithd1   |
| ENSMUSG00000028121 | 3137 Bcar3    |
| ENSMUSG00000072258 | 3138 Taf1a    |
| ENSMUSG00000032740 | 3139 Ccdc88a  |
| ENSMUSG00000031922 | 3140 Cep57    |
| ENSMUSG00000034751 | 3141 Mast4    |
| ENSMUSG00000025103 | 3142 Btbd1    |
| ENSMUSG00000030301 | 3143 Ccdc91   |
| ENSMUSG00000064357 | 3144 mt-Atp6  |
| ENSMUSG00000025453 | 3145 Nnt      |
| ENSMUSG00000036779 | 3146 Papd5    |
| ENSMUSG00000061028 | 3147 Clsrp    |
| ENSMUSG00000107350 | 3148 Gm42532  |

|                     |                |
|---------------------|----------------|
| ENSMUSG00000003458  | 3149 Ncstn     |
| ENSMUSG000000031024 | 3150 St5       |
| ENSMUSG00000002846  | 3151 Timmdc1   |
| ENSMUSG000000034826 | 3152 Nup54     |
| ENSMUSG000000073563 | 3153 Csnk1g3   |
| ENSMUSG000000029246 | 3154 Ppat      |
| ENSMUSG000000026484 | 3155 Rnf2      |
| ENSMUSG000000022223 | 3156 Sdr39u1   |
| ENSMUSG000000060227 | 3157 Casc4     |
| ENSMUSG000000020773 | 3158 Trim47    |
| ENSMUSG000000022136 | 3159 Dnajc3    |
| ENSMUSG000000033793 | 3160 Atp6v1h   |
| ENSMUSG000000064145 | 3161 Arih2     |
| ENSMUSG000000020485 | 3162 Supt4a    |
| ENSMUSG000000021945 | 3163 Zmym2     |
| ENSMUSG000000054469 | 3164 Lclat1    |
| ENSMUSG000000031684 | 3165 Slc10a7   |
| ENSMUSG000000008301 | 3166 Phax      |
| ENSMUSG000000052533 | 3167 Nup188    |
| ENSMUSG000000041747 | 3168 Utp15     |
| ENSMUSG000000061298 | 3169 Agbl4     |
| ENSMUSG000000018921 | 3170 Pelp1     |
| ENSMUSG000000020079 | 3171 Supv3l1   |
| ENSMUSG000000041565 | 3172 L3mbtl4   |
| ENSMUSG000000040852 | 3173 Plekhh2   |
| ENSMUSG000000078671 | 3174 Chd2      |
| ENSMUSG000000002250 | 3175 Ppard     |
| ENSMUSG000000000296 | 3176 Tpd52l1   |
| ENSMUSG000000030161 | 3177 Gabarapl1 |
| ENSMUSG000000015133 | 3178 Lrrk1     |
| ENSMUSG000000058997 | 3179 Vwa8      |
| ENSMUSG000000027601 | 3180 Mtfr1     |
| ENSMUSG000000101606 | 3181 Gm29051   |
| ENSMUSG000000035919 | 3182 Bbs9      |
| ENSMUSG000000021982 | 3183 Cdadc1    |
| ENSMUSG000000037958 | 3184 Ccdc55    |
| ENSMUSG000000041225 | 3185 Arhgap12  |
| ENSMUSG000000002728 | 3186 Naa20     |
| ENSMUSG000000040420 | 3187 Cdh18     |
| ENSMUSG000000038084 | 3188 Opa1      |
| ENSMUSG000000025872 | 3189 Thoc3     |
| ENSMUSG000000027599 | 3190 Armc1     |

|                    |               |
|--------------------|---------------|
| ENSMUSG00000062328 | 3191 Rpl17    |
| ENSMUSG00000039263 | 3192 Npepl1   |
| ENSMUSG00000032293 | 3193 Ireb2    |
| ENSMUSG00000064354 | 3194 mt-Co2   |
| ENSMUSG00000024943 | 3195 Smc5     |
| ENSMUSG00000026626 | 3196 Ppp2r5a  |
| ENSMUSG00000031226 | 3197 Pbdcl    |
| ENSMUSG00000025754 | 3198 Agbl1    |
| ENSMUSG00000001436 | 3199 Slc19a1  |
| ENSMUSG00000024369 | 3200 Nelfe    |
| ENSMUSG00000045273 | 3201 Cenph    |
| ENSMUSG00000022570 | 3202 Tsta3    |
| ENSMUSG00000047036 | 3203 Zfp445   |
| ENSMUSG00000006732 | 3204 Mettl1   |
| ENSMUSG00000032714 | 3205 Syde1    |
| ENSMUSG00000047945 | 3206 Marcksl1 |
| ENSMUSG00000038127 | 3207 Ccdc50   |
| ENSMUSG00000021725 | 3208 Parp8    |
| ENSMUSG00000025793 | 3209 Hgs      |
| ENSMUSG00000101448 | 3210 Gm28494  |
| ENSMUSG00000055067 | 3211 Smyd3    |
| ENSMUSG00000030655 | 3212 Smg1     |
| ENSMUSG00000073982 | 3213 Rhog     |
| ENSMUSG00000023904 | 3214 Hcfc1r1  |
| ENSMUSG00000030352 | 3215 Tspan9   |
| ENSMUSG00000032580 | 3216 Rbm5     |
| ENSMUSG00000034543 | 3217 Morc2a   |
| ENSMUSG00000029388 | 3218 Eif2b1   |
| ENSMUSG00000016253 | 3219 Nelfcd   |
| ENSMUSG00000042211 | 3220 Fbxo38   |
| ENSMUSG00000042524 | 3221 Sun2     |
| ENSMUSG00000020464 | 3222 Pnpt1    |
| ENSMUSG00000006299 | 3223 Aamp     |
| ENSMUSG00000021468 | 3224 Sptlc1   |
| ENSMUSG00000026739 | 3225 Bmi1     |
| ENSMUSG00000032518 | 3226 Rpsa     |
| ENSMUSG00000024603 | 3227 Dctn4    |
| ENSMUSG00000000776 | 3228 Polr3d   |
| ENSMUSG00000024270 | 3229 Slc39a6  |
| ENSMUSG00000028138 | 3230 Adh5     |
| ENSMUSG00000024096 | 3231 Ralbp1   |
| ENSMUSG00000024911 | 3232 Fibp     |

|                    |                    |
|--------------------|--------------------|
| ENSMUSG00000058301 | 3233 Upf1          |
| ENSMUSG00000015023 | 3234 Ddx19a        |
| ENSMUSG00000016946 | 3235 Kctd5         |
| ENSMUSG00000040620 | 3236 Dhx33         |
| ENSMUSG00000037519 | 3237 Ppfia1        |
| ENSMUSG00000035673 | 3238 Sbno2         |
| ENSMUSG00000000628 | 3239 Hk2           |
| ENSMUSG00000025037 | 3240 Maoa          |
| ENSMUSG00000034781 | 3241 Gna11         |
| ENSMUSG00000032526 | 3242 Deb1          |
| ENSMUSG00000022142 | 3243 Nup155        |
| ENSMUSG00000024999 | 3244 Noc3l         |
| ENSMUSG00000045948 | 3245 Mrps12        |
| ENSMUSG00000022855 | 3246 Senp2         |
| ENSMUSG00000019947 | 3247 Arid5b        |
| ENSMUSG00000029146 | 3248 Snx17         |
| ENSMUSG00000014856 | 3249 Tmem208       |
| ENSMUSG00000028578 | 3250 Caap1         |
| ENSMUSG00000024044 | 3251 Epb41l3       |
| ENSMUSG00000032051 | 3252 Fdx1          |
| ENSMUSG00000048410 | 3253 Zfp407        |
| ENSMUSG00000042390 | 3254 Gatad2b       |
| ENSMUSG00000031917 | 3255 Nip7          |
| ENSMUSG00000045083 | 3256 Lingo2        |
| ENSMUSG00000020198 | 3257 Ap3d1         |
| ENSMUSG00000039959 | 3258 Hip1          |
| ENSMUSG00000026790 | 3259 Odf2          |
| ENSMUSG00000079084 | 3260 Ccdc82        |
| ENSMUSG00000044308 | 3261 Ubr3          |
| ENSMUSG00000011831 | 3262 Evi5          |
| ENSMUSG00000029004 | 3263 Kmt2e         |
| ENSMUSG00000024483 | 3264 Ankhd1        |
| ENSMUSG00000052593 | 3265 Adam17        |
| ENSMUSG00000058833 | 3266 2810428l15Rik |
| ENSMUSG00000000085 | 3267 Scmh1         |
| ENSMUSG00000034135 | 3268 Sik3          |
| ENSMUSG00000039428 | 3269 Tmem135       |
| ENSMUSG00000021731 | 3270 Mrps30        |
| ENSMUSG00000055917 | 3271 Zfp277        |
| ENSMUSG00000002210 | 3272 Smg9          |
| ENSMUSG00000028053 | 3273 Ash1l         |
| ENSMUSG00000035049 | 3274 Rrp12         |

|                    |                    |
|--------------------|--------------------|
| ENSMUSG00000034453 | 3275 Polr3b        |
| ENSMUSG00000032536 | 3276 Trak1         |
| ENSMUSG00000040006 | 3277 Ginm1         |
| ENSMUSG00000062822 | 3278 4833420G17Rik |
| ENSMUSG00000032560 | 3279 Dnajc13       |
| ENSMUSG00000024561 | 3280 Mbd1          |
| ENSMUSG00000024989 | 3281 Cep55         |
| ENSMUSG00000045100 | 3282 Slc25a26      |
| ENSMUSG00000028393 | 3283 Alad          |
| ENSMUSG00000025134 | 3284 Alyref        |
| ENSMUSG00000032624 | 3285 Eml4          |
| ENSMUSG00000024182 | 3286 Axin1         |
| ENSMUSG00000029156 | 3287 Sgcb          |
| ENSMUSG00000033237 | 3288 Arid2         |
| ENSMUSG00000043421 | 3289 Hilpda        |
| ENSMUSG00000061353 | 3290 Cxcl12        |
| ENSMUSG00000020462 | 3291 Cfap36        |
| ENSMUSG00000022387 | 3292 Brd1          |
| ENSMUSG00000021133 | 3293 Susd6         |
| ENSMUSG00000028780 | 3294 Sema3c        |
| ENSMUSG00000071573 | 3295 Rnls          |
| ENSMUSG00000031904 | 3296 Slc7a6        |
| ENSMUSG00000001305 | 3297 Rrp15         |
| ENSMUSG00000027035 | 3298 Cers6         |
| ENSMUSG00000022092 | 3299 Ppp3cc        |
| ENSMUSG00000031232 | 3300 Magt1         |
| ENSMUSG00000066553 | 3301 Gm6969        |
| ENSMUSG00000049470 | 3302 Aff4          |
| ENSMUSG00000024294 | 3303 Mib1          |
| ENSMUSG00000030766 | 3304 Arhgap17      |
| ENSMUSG00000030168 | 3305 Adipor2       |
| ENSMUSG00000028261 | 3306 Ndufaf4       |
| ENSMUSG00000087475 | 3307 4933406I18Rik |
| ENSMUSG00000046985 | 3308 Tapt1         |
| ENSMUSG00000028443 | 3309 Nudt2         |
| ENSMUSG00000044646 | 3310 Zbtb7c        |
| ENSMUSG00000049422 | 3311 Chchd10       |
| ENSMUSG00000026043 | 3312 Col3a1        |
| ENSMUSG00000042410 | 3313 Agps          |
| ENSMUSG00000057637 | 3314 Prdm2         |
| ENSMUSG00000003865 | 3315 Gys1          |
| ENSMUSG00000104864 | 3316 Gm43655       |

|                    |                |
|--------------------|----------------|
| ENSMUSG00000070047 | 3317 Fat1      |
| ENSMUSG00000028029 | 3318 Aimp1     |
| ENSMUSG00000021326 | 3319 Trim27    |
| ENSMUSG00000001891 | 3320 Ugp2      |
| ENSMUSG00000017119 | 3321 Nbr1      |
| ENSMUSG00000035198 | 3322 Tubg1     |
| ENSMUSG00000020821 | 3323 Kif1c     |
| ENSMUSG00000033909 | 3324 Usp36     |
| ENSMUSG00000034595 | 3325 Ppp1r18   |
| ENSMUSG00000029634 | 3326 Rnf6      |
| ENSMUSG00000024104 | 3327 Fam21     |
| ENSMUSG00000055116 | 3328 Arntl     |
| ENSMUSG00000035696 | 3329 Rnf38     |
| ENSMUSG00000027598 | 3330 Itch      |
| ENSMUSG00000041895 | 3331 Wipi1     |
| ENSMUSG00000029560 | 3332 Snx8      |
| ENSMUSG00000028480 | 3333 Glipr2    |
| ENSMUSG00000000959 | 3334 Oxa1l     |
| ENSMUSG00000027411 | 3335 Vps16     |
| ENSMUSG00000061979 | 3336 Wbscr16   |
| ENSMUSG00000034022 | 3337 Cpsf1     |
| ENSMUSG00000035248 | 3338 Zcchc6    |
| ENSMUSG00000001829 | 3339 Clpb      |
| ENSMUSG00000061887 | 3340 Ssbp3     |
| ENSMUSG00000035392 | 3341 Dennd1a   |
| ENSMUSG00000026867 | 3342 Gapvd1    |
| ENSMUSG00000004945 | 3343 Tmem242   |
| ENSMUSG00000030101 | 3344 Sumf1     |
| ENSMUSG00000048039 | 3345 Isg20l2   |
| ENSMUSG00000067869 | 3346 Tcea1-ps1 |
| ENSMUSG00000057421 | 3347 Las1l     |
| ENSMUSG00000028670 | 3348 Lypla2    |
| ENSMUSG00000024177 | 3349 Nme4      |
| ENSMUSG00000029017 | 3350 Pmpcb     |
| ENSMUSG00000027782 | 3351 Kpna4     |
| ENSMUSG00000048234 | 3352 Rnf149    |
| ENSMUSG00000031157 | 3353 Pqbp1     |
| ENSMUSG00000022508 | 3354 Bcl6      |
| ENSMUSG00000041625 | 3355 Ggact     |
| ENSMUSG00000025369 | 3356 Smarcc2   |
| ENSMUSG00000034354 | 3357 Mtmr3     |
| ENSMUSG00000015757 | 3358 Ppil4     |



|                    |                |
|--------------------|----------------|
| ENSMUSG00000038446 | 3359 Cdc40     |
| ENSMUSG00000029649 | 3360 Pomp      |
| ENSMUSG00000064348 | 3361 mt-Tn     |
| ENSMUSG00000024259 | 3362 Slc25a46  |
| ENSMUSG00000067870 | 3363 Rpl31-ps8 |
| ENSMUSG00000029536 | 3364 Gatc      |
| ENSMUSG00000024782 | 3365 Ak3       |
| ENSMUSG00000010914 | 3366 Pdhx      |
| ENSMUSG00000024211 | 3367 Grm8      |
| ENSMUSG00000028484 | 3368 Psip1     |
| ENSMUSG00000029505 | 3369 Ep400     |
| ENSMUSG00000028683 | 3370 Eif2b3    |
| ENSMUSG00000028070 | 3371 APOA1BP   |
| ENSMUSG00000039163 | 3372 Cmc1      |
| ENSMUSG00000034108 | 3373 Ccs       |
| ENSMUSG00000008429 | 3374 Herpud2   |
| ENSMUSG00000003068 | 3375 Stk11     |
| ENSMUSG00000012483 | 3376 Rpa3      |
| ENSMUSG00000039539 | 3377 Sgcz      |
| ENSMUSG00000007817 | 3378 Zmiz1     |
| ENSMUSG00000020728 | 3379 Cep112    |
| ENSMUSG00000020549 | 3380 Elac2     |
| ENSMUSG00000034480 | 3381 Diap2     |
| ENSMUSG00000025198 | 3382 Erlin1    |
| ENSMUSG00000032418 | 3383 Me1       |
| ENSMUSG00000022881 | 3384 Rfc4      |
| ENSMUSG00000021470 | 3385 Ercc6l2   |
| ENSMUSG00000031921 | 3386 Terf2     |
| ENSMUSG00000021711 | 3387 Trappc13  |
| ENSMUSG00000021009 | 3388 Ptpn21    |
| ENSMUSG00000038240 | 3389 Pdss2     |
| ENSMUSG00000021143 | 3390 Pacs2     |
| ENSMUSG00000069495 | 3391 Epc2      |
| ENSMUSG00000025858 | 3392 Get4      |
| ENSMUSG00000074748 | 3393 Atxn7l3b  |
| ENSMUSG00000027304 | 3394 Rtf1      |
| ENSMUSG00000057469 | 3395 E2f6      |
| ENSMUSG00000024759 | 3396 AtI3      |
| ENSMUSG00000002733 | 3397 Plekha3   |
| ENSMUSG00000018398 | 3398 8-Sep     |
| ENSMUSG00000035754 | 3399 Wdr18     |
| ENSMUSG00000028970 | 3400 Abcb1b    |

|                    |                    |
|--------------------|--------------------|
| ENSMUSG00000058886 | 3401 Deaf1         |
| ENSMUSG00000040913 | 3402 Fbxw4         |
| ENSMUSG00000026827 | 3403 Gpd2          |
| ENSMUSG00000019689 | 3404 1110001J03Rik |
| ENSMUSG00000027823 | 3405 Gmps          |
| ENSMUSG00000031371 | 3406 Haus7         |
| ENSMUSG00000020817 | 3407 Rabep1        |
| ENSMUSG00000043153 | 3408 lspd          |
| ENSMUSG00000029131 | 3409 Dnajib6       |
| ENSMUSG00000039145 | 3410 Camk1d        |
| ENSMUSG00000025220 | 3411 Mgea5         |
| ENSMUSG00000020173 | 3412 Cobl          |
| ENSMUSG00000025758 | 3413 Plk4          |
| ENSMUSG00000041852 | 3414 Tcf20         |
| ENSMUSG00000020463 | 3415 Smek2         |
| ENSMUSG00000025340 | 3416 Rabgef1       |
| ENSMUSG00000058318 | 3417 Phf21a        |
| ENSMUSG00000045095 | 3418 Magi1         |
| ENSMUSG00000034520 | 3419 Gjc1          |
| ENSMUSG00000062115 | 3420 Rai1          |
| ENSMUSG00000037824 | 3421 Tspan14       |
| ENSMUSG00000042606 | 3422 Hirip3        |
| ENSMUSG00000002949 | 3423 Timm44        |
| ENSMUSG00000014606 | 3424 Slc25a11      |
| ENSMUSG00000009894 | 3425 Snap47        |
| ENSMUSG00000025139 | 3426 Tollip        |
| ENSMUSG00000028911 | 3427 Srsf4         |
| ENSMUSG00000013701 | 3428 Timm23        |
| ENSMUSG00000008958 | 3429 Vps72         |
| ENSMUSG00000028923 | 3430 Necap2        |
| ENSMUSG00000004846 | 3431 Plod3         |
| ENSMUSG00000032503 | 3432 Arpp21        |
| ENSMUSG00000024132 | 3433 Eci1          |
| ENSMUSG00000083720 | 3434 Gm12901       |
| ENSMUSG00000057982 | 3435 Zfp809        |
| ENSMUSG00000063696 | 3436 Gm8730        |
| ENSMUSG00000022867 | 3437 Usp25         |
| ENSMUSG00000040940 | 3438 Arhgef1       |
| ENSMUSG00000020380 | 3439 Rad50         |
| ENSMUSG00000044863 | 3440 Defb36        |
| ENSMUSG00000028651 | 3441 Ppie          |
| ENSMUSG00000037725 | 3442 Ckap2         |

|                    |              |
|--------------------|--------------|
| ENSMUSG00000025027 | 3443 Xpnpep1 |
| ENSMUSG00000002064 | 3444 Sdf2    |
| ENSMUSG00000026475 | 3445 Rgs16   |
| ENSMUSG00000027340 | 3446 Slc23a2 |
| ENSMUSG00000001280 | 3447 Sp1     |
| ENSMUSG00000004085 | 3448 Zak     |
| ENSMUSG00000002014 | 3449 Ssr4    |
| ENSMUSG00000029426 | 3450 Scarb2  |
| ENSMUSG00000042369 | 3451 Rbm45   |
| ENSMUSG00000045078 | 3452 Rnf216  |
| ENSMUSG00000026162 | 3453 Nhej1   |
| ENSMUSG00000000826 | 3454 Dnajc5  |
| ENSMUSG00000021519 | 3455 Mterf3  |
| ENSMUSG00000001120 | 3456 Pcbp3   |
| ENSMUSG00000005069 | 3457 Pex5    |
| ENSMUSG00000024858 | 3458 Adrbk1  |
| ENSMUSG00000041995 | 3459 Zbed3   |
| ENSMUSG00000060450 | 3460 Rnf14   |
| ENSMUSG00000021215 | 3461 Net1    |
| ENSMUSG00000020964 | 3462 Sel1l   |
| ENSMUSG00000033373 | 3463 Fntb    |
| ENSMUSG00000017631 | 3464 Abr     |
| ENSMUSG00000075701 | 3465 Vimp    |
| ENSMUSG00000031902 | 3466 Nfatc3  |
| ENSMUSG00000028405 | 3467 Aco1    |
| ENSMUSG00000025534 | 3468 Gusb    |
| ENSMUSG00000003039 | 3469 Fam32a  |
| ENSMUSG00000006717 | 3470 Acot13  |
| ENSMUSG00000010911 | 3471 Apip    |
| ENSMUSG00000025208 | 3472 Mrpl43  |
| ENSMUSG00000028883 | 3473 Sema3a  |
| ENSMUSG00000071454 | 3474 Dtnb    |
| ENSMUSG00000039474 | 3475 Wfs1    |
| ENSMUSG00000062661 | 3476 Ncs1    |
| ENSMUSG00000051747 | 3477 Ttn     |
| ENSMUSG00000057497 | 3478 Fam136a |
| ENSMUSG00000002458 | 3479 Rgs19   |
| ENSMUSG00000044791 | 3480 Setd2   |
| ENSMUSG00000080268 | 3481 Brms1   |
| ENSMUSG00000032834 | 3482 Pwp2    |
| ENSMUSG00000038845 | 3483 Phb     |
| ENSMUSG00000020407 | 3484 Upp1    |

|                     |                    |
|---------------------|--------------------|
| ENSMUSG00000075470  | 3485 Alg10b        |
| ENSMUSG00000054843  | 3486 Atrnl1        |
| ENSMUSG00000038503  | 3487 Mesdc2        |
| ENSMUSG00000024937  | 3488 Ehbp1l1       |
| ENSMUSG00000048915  | 3489 Efna5         |
| ENSMUSG00000024423  | 3490 Impact        |
| ENSMUSG00000041702  | 3491 Btbd7         |
| ENSMUSG00000004677  | 3492 Myo9b         |
| ENSMUSG00000054453  | 3493 Sytl5         |
| ENSMUSG00000030530  | 3494 Furin         |
| ENSMUSG00000071180  | 3495 Smim15        |
| ENSMUSG00000018339  | 3496 Gpx3          |
| ENSMUSG00000032388  | 3497 Spg21         |
| ENSMUSG00000029757  | 3498 Dync1i1       |
| ENSMUSG00000028522  | 3499 Mier1         |
| ENSMUSG00000023868  | 3500 Pde10a        |
| ENSMUSG00000022085  | 3501 Pebp4         |
| ENSMUSG00000039901  | 3502 9130011E15Rik |
| ENSMUSG00000040591  | 3503 1110051M20Rik |
| ENSMUSG00000040174  | 3504 Alkbh3        |
| ENSMUSG00000009035  | 3505 Tmem184b      |
| ENSMUSG00000028032  | 3506 Papss1        |
| ENSMUSG00000005370  | 3507 Msh6          |
| ENSMUSG00000026869  | 3508 Psmc5         |
| ENSMUSG000000097296 | 3509 Gm26532       |
| ENSMUSG00000002326  | 3510 Gmpr2         |
| ENSMUSG00000039219  | 3511 Arid4b        |
| ENSMUSG00000038736  | 3512 Nudcd1        |
| ENSMUSG00000074247  | 3513 Dda1          |
| ENSMUSG00000027490  | 3514 E2f1          |
| ENSMUSG000000107494 | 3515 RP23-15K8.1   |
| ENSMUSG00000031530  | 3516 Dusp4         |
| ENSMUSG00000061533  | 3517 Cep128        |
| ENSMUSG00000014592  | 3518 Camta1        |
| ENSMUSG00000027770  | 3519 Dhx36         |
| ENSMUSG00000034401  | 3520 Spata6        |
| ENSMUSG00000000339  | 3521 Rtca          |
| ENSMUSG00000038274  | 3522 Fau           |
| ENSMUSG00000019817  | 3523 Plagl1        |
| ENSMUSG00000031865  | 3524 Dctn1         |
| ENSMUSG00000020836  | 3525 Coro6         |
| ENSMUSG00000057363  | 3526 Uxs1          |

|                    |              |
|--------------------|--------------|
| ENSMUSG00000029629 | 3527 Phf14   |
| ENSMUSG00000019878 | 3528 Hsf2    |
| ENSMUSG00000021993 | 3529 Mipep   |
| ENSMUSG00000007338 | 3530 Mrpl49  |
| ENSMUSG00000047368 | 3531 Abhd17b |
| ENSMUSG00000097342 | 3532 Gm26618 |
| ENSMUSG00000020170 | 3533 Frs2    |
| ENSMUSG00000005470 | 3534 Asf1b   |
| ENSMUSG00000024941 | 3535 Scyl1   |
| ENSMUSG00000041685 | 3536 Fcho2   |
| ENSMUSG00000021501 | 3537 Caml    |
| ENSMUSG00000035585 | 3538 Tsen34  |
| ENSMUSG00000027379 | 3539 Bub1    |
| ENSMUSG00000028436 | 3540 Dcaf12  |
| ENSMUSG00000079036 | 3541 Alkbh1  |
| ENSMUSG00000027207 | 3542 Galk2   |
| ENSMUSG00000038695 | 3543 Josd2   |
| ENSMUSG00000025229 | 3544 Pitx3   |
| ENSMUSG00000020592 | 3545 Sdc1    |
| ENSMUSG00000021952 | 3546 Xpo4    |
| ENSMUSG00000100197 | 3547 Gm28638 |
| ENSMUSG00000015668 | 3548 Pdzd11  |
| ENSMUSG00000046792 | 3549 Zfp787  |
| ENSMUSG00000028127 | 3550 Abcd3   |
| ENSMUSG00000062963 | 3551 Ufc1    |
| ENSMUSG00000022772 | 3552 Senp5   |
| ENSMUSG00000002625 | 3553 Akap8l  |
| ENSMUSG00000053094 | 3554 Tmem248 |
| ENSMUSG00000019768 | 3555 Esr1    |
| ENSMUSG00000024500 | 3556 Ppp2r2b |
| ENSMUSG00000058006 | 3557 Mdn1    |
| ENSMUSG00000051934 | 3558 Spats2  |
| ENSMUSG00000045867 | 3559 Cradd   |
| ENSMUSG00000020224 | 3560 Llph    |
| ENSMUSG00000058806 | 3561 Col13a1 |
| ENSMUSG00000024969 | 3562 Mark2   |
| ENSMUSG00000027933 | 3563 Ints3   |
| ENSMUSG00000039100 | 3564 March6  |
| ENSMUSG00000038296 | 3565 Galnt18 |
| ENSMUSG00000105558 | 3566 Gm5855  |
| ENSMUSG00000051329 | 3567 Nup160  |
| ENSMUSG00000054520 | 3568 Sh3bp2  |

|                    |                    |
|--------------------|--------------------|
| ENSMUSG00000029775 | 3569 Klhdc10       |
| ENSMUSG00000029920 | 3570 Smarcad1      |
| ENSMUSG00000022711 | 3571 Pmm2          |
| ENSMUSG00000003346 | 3572 Abhd17a       |
| ENSMUSG00000032126 | 3573 Hmbs          |
| ENSMUSG00000019738 | 3574 Polr2i        |
| ENSMUSG00000037966 | 3575 Ninj1         |
| ENSMUSG00000042650 | 3576 Alkbh5        |
| ENSMUSG00000045193 | 3577 Cirbp         |
| ENSMUSG00000028431 | 3578 Ikbkap        |
| ENSMUSG00000034708 | 3579 Grn           |
| ENSMUSG00000037341 | 3580 Slc9a7        |
| ENSMUSG00000030339 | 3581 Ltbr          |
| ENSMUSG00000035772 | 3582 Mrps2         |
| ENSMUSG00000020515 | 3583 Cnot8         |
| ENSMUSG00000004056 | 3584 Akt2          |
| ENSMUSG00000034290 | 3585 Nek9          |
| ENSMUSG00000027637 | 3586 1110008F13Rik |
| ENSMUSG00000049641 | 3587 Vgll2         |
| ENSMUSG00000018160 | 3588 Med1          |
| ENSMUSG00000017376 | 3589 Nlk           |
| ENSMUSG00000022561 | 3590 Gpaal         |
| ENSMUSG00000036768 | 3591 Kif15         |
| ENSMUSG00000024927 | 3592 Rela          |
| ENSMUSG00000024026 | 3593 Glo1          |
| ENSMUSG00000021395 | 3594 Spin1         |
| ENSMUSG00000030067 | 3595 Foxp1         |
| ENSMUSG00000032480 | 3596 Dhx30         |
| ENSMUSG00000052512 | 3597 Nav2          |
| ENSMUSG00000034621 | 3598 Gpatch8       |
| ENSMUSG00000032415 | 3599 Ube2cbp       |
| ENSMUSG00000020646 | 3600 Mboat2        |
| ENSMUSG00000028886 | 3601 Eya3          |
| ENSMUSG00000028233 | 3602 Tgs1          |
| ENSMUSG00000036932 | 3603 Aifm1         |
| ENSMUSG00000031862 | 3604 Atp13a1       |
| ENSMUSG00000026617 | 3605 Bpnt1         |
| ENSMUSG00000028437 | 3606 Ubap1         |
| ENSMUSG00000002020 | 3607 Ltbp2         |
| ENSMUSG00000021357 | 3608 Exoc2         |
| ENSMUSG00000058925 | 3609 1700011I03Rik |
| ENSMUSG00000036822 | 3610 Topors        |

|                    |               |
|--------------------|---------------|
| ENSMUSG00000021597 | 3611 Slf1     |
| ENSMUSG00000025786 | 3612 Zdhhc3   |
| ENSMUSG00000026618 | 3613 lars2    |
| ENSMUSG00000004394 | 3614 Tmed4    |
| ENSMUSG00000057234 | 3615 Mettl15  |
| ENSMUSG00000022012 | 3616 Enox1    |
| ENSMUSG00000004880 | 3617 Lbr      |
| ENSMUSG00000030341 | 3618 Tnfrsf1a |
| ENSMUSG00000036810 | 3619 Cnep1r1  |
| ENSMUSG00000060601 | 3620 Nr1h2    |
| ENSMUSG00000049553 | 3621 Polr1a   |
| ENSMUSG00000024454 | 3622 Hdac3    |
| ENSMUSG00000021669 | 3623 Col4a3bp |
| ENSMUSG00000021981 | 3624 Cab39l   |
| ENSMUSG00000026393 | 3625 Nek7     |
| ENSMUSG00000040282 | 3626 BC052040 |
| ENSMUSG00000021033 | 3627 Gstz1    |
| ENSMUSG00000056216 | 3628 Cebpg    |
| ENSMUSG00000018882 | 3629 Mrpl45   |
| ENSMUSG00000026600 | 3630 Soat1    |
| ENSMUSG00000034064 | 3631 Poglut1  |
| ENSMUSG00000024085 | 3632 Man2a1   |
| ENSMUSG00000001082 | 3633 Mfsd10   |
| ENSMUSG00000003808 | 3634 Farsa    |
| ENSMUSG00000046876 | 3635 Atxn1    |
| ENSMUSG00000087614 | 3636 Gm12514  |
| ENSMUSG00000031540 | 3637 Kat6a    |
| ENSMUSG00000033382 | 3638 Trappc8  |
| ENSMUSG00000051396 | 3639 Hspa14   |
| ENSMUSG00000020692 | 3640 Nle1     |
| ENSMUSG00000021901 | 3641 Bap1     |
| ENSMUSG00000062397 | 3642 Zfp706   |
| ENSMUSG00000019792 | 3643 Trmt11   |
| ENSMUSG00000021540 | 3644 Smad5    |
| ENSMUSG00000016619 | 3645 Nup50    |
| ENSMUSG00000027673 | 3646 Ndufb5   |
| ENSMUSG00000033632 | 3647 AW554918 |
| ENSMUSG00000061981 | 3648 Flot2    |
| ENSMUSG00000054555 | 3649 Adam12   |
| ENSMUSG00000020115 | 3650 Tbk1     |
| ENSMUSG00000027523 | 3651 Gnas     |
| ENSMUSG00000027466 | 3652 Rbck1    |

|                     |                    |
|---------------------|--------------------|
| ENSMUSG00000087380  | 3653 2210408F21Rik |
| ENSMUSG00000021196  | 3654 Pfkp          |
| ENSMUSG00000042032  | 3655 Mat2b         |
| ENSMUSG00000033031  | 3656 C330027C09Rik |
| ENSMUSG00000036026  | 3657 Tmem63b       |
| ENSMUSG00000032047  | 3658 Acat1         |
| ENSMUSG00000031533  | 3659 Mrps31        |
| ENSMUSG00000039911  | 3660 Spsb1         |
| ENSMUSG00000063406  | 3661 Tmed5         |
| ENSMUSG00000045036  | 3662 Tmem232       |
| ENSMUSG00000025350  | 3663 Rdh5          |
| ENSMUSG00000015522  | 3664 Arnt          |
| ENSMUSG00000029253  | 3665 Cenpc1        |
| ENSMUSG00000003849  | 3666 Nqo1          |
| ENSMUSG00000041219  | 3667 Arhgap11a     |
| ENSMUSG00000015291  | 3668 Gdi1          |
| ENSMUSG00000031901  | 3669 Dus2          |
| ENSMUSG00000027351  | 3670 Spred1        |
| ENSMUSG00000039480  | 3671 Nt5dc1        |
| ENSMUSG00000051401  | 3672 Kctd16        |
| ENSMUSG00000026918  | 3673 Brd3          |
| ENSMUSG00000024826  | 3674 Dpf2          |
| ENSMUSG00000059658  | 3675 Gm16379       |
| ENSMUSG00000031262  | 3676 Cenpi         |
| ENSMUSG00000029034  | 3677 Cpsf3l        |
| ENSMUSG00000054604  | 3678 Cggbp1        |
| ENSMUSG00000006392  | 3679 Med8          |
| ENSMUSG000000055681 | 3680 Cope          |
| ENSMUSG00000020476  | 3681 Dbnl          |
| ENSMUSG00000020941  | 3682 Map3k14       |
| ENSMUSG00000038025  | 3683 Phf2          |
| ENSMUSG00000029221  | 3684 Slc30a9       |
| ENSMUSG00000034311  | 3685 Kif4          |
| ENSMUSG00000029291  | 3686 Rufy3         |
| ENSMUSG00000026987  | 3687 Baz2b         |
| ENSMUSG00000037376  | 3688 Trmt6         |
| ENSMUSG00000020516  | 3689 Rps6kb1       |
| ENSMUSG00000038774  | 3690 Ascc3         |
| ENSMUSG00000108600  | 3691 RP23-145H5.1  |
| ENSMUSG00000022124  | 3692 Fbxl3         |
| ENSMUSG00000033737  | 3693 Fndc3c1       |
| ENSMUSG00000090118  | 3694 Gm16163       |



|                    |               |
|--------------------|---------------|
| ENSMUSG00000031568 | 3695 Rwdd4a   |
| ENSMUSG00000003847 | 3696 Nfat5    |
| ENSMUSG00000037278 | 3697 Tmem97   |
| ENSMUSG00000024151 | 3698 Msh2     |
| ENSMUSG00000069518 | 3699 Gm10271  |
| ENSMUSG00000062908 | 3700 Acadm    |
| ENSMUSG00000040351 | 3701 Ankib1   |
| ENSMUSG00000029782 | 3702 Tmem209  |
| ENSMUSG00000021311 | 3703 Mtr      |
| ENSMUSG00000049878 | 3704 Rlf      |
| ENSMUSG00000029534 | 3705 St7      |
| ENSMUSG00000024614 | 3706 Tmx3     |
| ENSMUSG00000028019 | 3707 Pdgfc    |
| ENSMUSG00000017144 | 3708 Rnd3     |
| ENSMUSG00000046062 | 3709 Ppp1r15b |
| ENSMUSG00000014313 | 3710 Cox6c    |
| ENSMUSG00000042962 | 3711 Gm5436   |
| ENSMUSG00000024063 | 3712 Lbh      |
| ENSMUSG00000027167 | 3713 Elp4     |
| ENSMUSG00000026753 | 3714 Ppp6c    |
| ENSMUSG00000003731 | 3715 Kpna6    |
| ENSMUSG00000044950 | 3716 Pwwp2a   |
| ENSMUSG00000021488 | 3717 Nsd1     |
| ENSMUSG00000032040 | 3718 Dcps     |
| ENSMUSG00000026965 | 3719 Anapc2   |
| ENSMUSG00000033326 | 3720 Kdm4a    |
| ENSMUSG00000027087 | 3721 Itgav    |
| ENSMUSG00000042225 | 3722 Ammecr1  |
| ENSMUSG00000032846 | 3723 Zswim6   |
| ENSMUSG00000033721 | 3724 Vav3     |
| ENSMUSG00000002221 | 3725 Paxip1   |
| ENSMUSG00000009741 | 3726 Ubp1     |
| ENSMUSG00000022676 | 3727 Snai2    |
| ENSMUSG00000071645 | 3728 Tut1     |
| ENSMUSG00000052928 | 3729 Ctif     |
| ENSMUSG00000103428 | 3730 Gm20754  |
| ENSMUSG00000034801 | 3731 Sos2     |
| ENSMUSG00000033186 | 3732 Mzt1     |
| ENSMUSG00000034893 | 3733 Cog3     |
| ENSMUSG00000050029 | 3734 Rap2c    |
| ENSMUSG00000086839 | 3735 Gm11973  |
| ENSMUSG00000046687 | 3736 Gm5424   |

|                    |                    |
|--------------------|--------------------|
| ENSMUSG00000047613 | 3737 A430005L14Rik |
| ENSMUSG00000030894 | 3738 Tpp1          |
| ENSMUSG00000059939 | 3739 9430015G10Rik |
| ENSMUSG00000026667 | 3740 Uhmk1         |
| ENSMUSG00000035851 | 3741 Ythdc1        |
| ENSMUSG00000020412 | 3742 Ascc2         |
| ENSMUSG00000021713 | 3743 Ppwd1         |
| ENSMUSG00000024145 | 3744 Pigf          |
| ENSMUSG00000059273 | 3745 Zc3h4         |
| ENSMUSG00000074800 | 3746 Gm4149        |
| ENSMUSG00000058897 | 3747 Col25a1       |
| ENSMUSG00000044934 | 3748 Zfp367        |
| ENSMUSG00000032468 | 3749 Armc8         |
| ENSMUSG00000034341 | 3750 Wbp2          |
| ENSMUSG00000027835 | 3751 Pdc10         |
| ENSMUSG00000034780 | 3752 B3galt1       |
| ENSMUSG00000040374 | 3753 Pex2          |
| ENSMUSG00000022681 | 3754 Ntan1         |
| ENSMUSG00000033278 | 3755 Ptprm         |
| ENSMUSG00000034345 | 3756 Gtf2h5        |
| ENSMUSG00000029672 | 3757 Fam3c         |
| ENSMUSG00000024242 | 3758 Map4k3        |
| ENSMUSG00000027287 | 3759 Snap23        |
| ENSMUSG00000102070 | 3760 Gm28661       |
| ENSMUSG00000060913 | 3761 Trim55        |
| ENSMUSG00000033436 | 3762 Armcx2        |
| ENSMUSG00000030095 | 3763 Tmem43        |
| ENSMUSG00000002635 | 3764 Pdc2l         |
| ENSMUSG00000072812 | 3765 Ahnak2        |
| ENSMUSG00000041961 | 3766 Znrf3         |
| ENSMUSG00000019659 | 3767 Ccdc12        |
| ENSMUSG00000036850 | 3768 Mrpl41        |
| ENSMUSG00000053617 | 3769 Sh3pxd2a      |
| ENSMUSG00000024855 | 3770 Pacs1         |
| ENSMUSG00000058600 | 3771 Rpl30         |
| ENSMUSG00000032777 | 3772 Gtf3c1        |
| ENSMUSG00000070923 | 3773 Klhl9         |
| ENSMUSG00000026473 | 3774 Glul          |
| ENSMUSG00000056763 | 3775 Cspp1         |
| ENSMUSG00000028293 | 3776 Slc35a1       |
| ENSMUSG00000031333 | 3777 Abcb7         |
| ENSMUSG00000040918 | 3778 Slc19a2       |

|                    |                    |
|--------------------|--------------------|
| ENSMUSG00000032307 | 3779 Ube2q2        |
| ENSMUSG00000062202 | 3780 Btbd9         |
| ENSMUSG00000009293 | 3781 Ube2g2        |
| ENSMUSG00000000359 | 3782 Rem1          |
| ENSMUSG00000086353 | 3783 Gm13481       |
| ENSMUSG00000011752 | 3784 Pgam1         |
| ENSMUSG00000031529 | 3785 Tnks          |
| ENSMUSG00000024812 | 3786 Tjp2          |
| ENSMUSG00000029518 | 3787 Rab35         |
| ENSMUSG00000030172 | 3788 Erc1          |
| ENSMUSG00000063568 | 3789 Jazf1         |
| ENSMUSG00000022035 | 3790 Ccdc25        |
| ENSMUSG00000024909 | 3791 Efemp2        |
| ENSMUSG00000021911 | 3792 Parg          |
| ENSMUSG00000026031 | 3793 Cflar         |
| ENSMUSG00000063480 | 3794 Nhp2l1        |
| ENSMUSG00000022019 | 3795 Tdrd3         |
| ENSMUSG00000050323 | 3796 Ndufaf6       |
| ENSMUSG00000058709 | 3797 EglN2         |
| ENSMUSG00000020974 | 3798 Pole2         |
| ENSMUSG00000022433 | 3799 Csnk1e        |
| ENSMUSG00000036698 | 3800 Ago2          |
| ENSMUSG00000063236 | 3801 1110038F14Rik |
| ENSMUSG00000049299 | 3802 Trappc1       |
| ENSMUSG00000042029 | 3803 Ncapg2        |
| ENSMUSG00000040720 | 3804 1110037F02Rik |
| ENSMUSG00000030612 | 3805 Mrpl46        |
| ENSMUSG00000032076 | 3806 Cadm1         |
| ENSMUSG00000067931 | 3807 Zfp948        |
| ENSMUSG00000033653 | 3808 Vps8          |
| ENSMUSG00000051403 | 3809 Ppp1r37       |
| ENSMUSG00000037470 | 3810 Ugg1          |
| ENSMUSG00000015880 | 3811 Ncapg         |
| ENSMUSG00000028519 | 3812 Dab1          |
| ENSMUSG00000041215 | 3813 Yeats2        |
| ENSMUSG00000105143 | 3814 Gm8069        |
| ENSMUSG00000062949 | 3815 Atp11c        |
| ENSMUSG00000031931 | 3816 Ankrd49       |
| ENSMUSG00000032667 | 3817 Pon2          |
| ENSMUSG00000028194 | 3818 Ddah1         |
| ENSMUSG00000037791 | 3819 Phf12         |
| ENSMUSG00000034892 | 3820 Rps29         |

|                    |                    |
|--------------------|--------------------|
| ENSMUSG00000043445 | 3821 Pgp           |
| ENSMUSG00000029578 | 3822 Wipi2         |
| ENSMUSG00000024251 | 3823 Thada         |
| ENSMUSG00000066057 | 3824 Gm1976        |
| ENSMUSG00000020262 | 3825 Adarb1        |
| ENSMUSG00000074797 | 3826 Itpa          |
| ENSMUSG00000034317 | 3827 Trim59        |
| ENSMUSG00000063077 | 3828 Kif1b         |
| ENSMUSG00000025326 | 3829 Ube3a         |
| ENSMUSG00000032478 | 3830 Nme6          |
| ENSMUSG00000038095 | 3831 Sbno1         |
| ENSMUSG00000061306 | 3832 Slc38a10      |
| ENSMUSG00000049550 | 3833 Clip1         |
| ENSMUSG00000018761 | 3834 Mpdu1         |
| ENSMUSG00000034007 | 3835 Scaper        |
| ENSMUSG00000097616 | 3836 1110019D14Rik |
| ENSMUSG00000020536 | 3837 Llgl1         |
| ENSMUSG00000028873 | 3838 Cdca8         |
| ENSMUSG00000037514 | 3839 Pank2         |
| ENSMUSG00000037300 | 3840 Ttc13         |
| ENSMUSG00000085806 | 3841 Gm12023       |
| ENSMUSG00000089872 | 3842 Rps6kc1       |
| ENSMUSG00000039753 | 3843 Fbxl5         |
| ENSMUSG00000043384 | 3844 Gprasp1       |
| ENSMUSG00000033323 | 3845 Ctdp1         |
| ENSMUSG00000037275 | 3846 Gemin5        |
| ENSMUSG00000011884 | 3847 Gltp          |
| ENSMUSG00000014243 | 3848 Zswim7        |
| ENSMUSG00000038535 | 3849 Zfp280d       |
| ENSMUSG00000030609 | 3850 Aen           |
| ENSMUSG00000020181 | 3851 Nav3          |
| ENSMUSG00000021067 | 3852 Sav1          |
| ENSMUSG00000021775 | 3853 Nr1d2         |
| ENSMUSG00000024644 | 3854 Cndp2         |
| ENSMUSG00000037243 | 3855 Zfp692        |
| ENSMUSG00000047710 | 3856 Champ1        |
| ENSMUSG00000047434 | 3857 Xxylt1        |
| ENSMUSG00000005609 | 3858 Ctr9          |
| ENSMUSG00000038412 | 3859 Higd1a        |
| ENSMUSG00000011158 | 3860 Brf1          |
| ENSMUSG00000025909 | 3861 Sntg1         |
| ENSMUSG00000033713 | 3862 Foxn3         |

|                    |                    |
|--------------------|--------------------|
| ENSMUSG00000039887 | 3863 Alg14         |
| ENSMUSG00000013076 | 3864 Amotl1        |
| ENSMUSG00000040021 | 3865 Lats1         |
| ENSMUSG00000020576 | 3866 Nbas          |
| ENSMUSG00000025898 | 3867 Cwf19l2       |
| ENSMUSG00000029705 | 3868 Cux1          |
| ENSMUSG00000026806 | 3869 Ddx31         |
| ENSMUSG00000022914 | 3870 Brwd1         |
| ENSMUSG00000042535 | 3871 Gtpbp1        |
| ENSMUSG00000032030 | 3872 Cul5          |
| ENSMUSG00000036469 | 3873 1-Mar         |
| ENSMUSG00000028653 | 3874 Trit1         |
| ENSMUSG00000034793 | 3875 G6pc3         |
| ENSMUSG00000021176 | 3876 Efcab11       |
| ENSMUSG00000074746 | 3877 Pdzd8         |
| ENSMUSG00000024570 | 3878 Rbfa          |
| ENSMUSG00000004268 | 3879 Emg1          |
| ENSMUSG00000009207 | 3880 Lnp           |
| ENSMUSG00000053153 | 3881 Spag16        |
| ENSMUSG00000002900 | 3882 Lamb1         |
| ENSMUSG00000090066 | 3883 1110002E22Rik |
| ENSMUSG00000027253 | 3884 Lrp4          |
| ENSMUSG00000035834 | 3885 Polr3g        |
| ENSMUSG00000058589 | 3886 Anks1b        |
| ENSMUSG00000002948 | 3887 Map2k7        |
| ENSMUSG00000020069 | 3888 Hnrnp3        |
| ENSMUSG00000030036 | 3889 Mogs          |
| ENSMUSG00000069972 | 3890 Rps13-ps2     |
| ENSMUSG00000022791 | 3891 Tnk2          |
| ENSMUSG00000056091 | 3892 St3gal5       |
| ENSMUSG00000052253 | 3893 Zfp622        |
| ENSMUSG00000022587 | 3894 Ly6e          |
| ENSMUSG00000025474 | 3895 Tubgcp2       |
| ENSMUSG00000019210 | 3896 Atp6v1e1      |
| ENSMUSG00000026575 | 3897 Nme7          |
| ENSMUSG00000020736 | 3898 Nt5c          |
| ENSMUSG00000028986 | 3899 Khl17         |
| ENSMUSG00000057130 | 3900 Txnl4a        |
| ENSMUSG00000031788 | 3901 Kifc3         |
| ENSMUSG00000030822 | 3902 Prr14         |
| ENSMUSG00000036606 | 3903 Plxnb2        |
| ENSMUSG00000058503 | 3904 Fam133b       |

|                    |                    |
|--------------------|--------------------|
| ENSMUSG00000022246 | 3905 Rai14         |
| ENSMUSG00000025266 | 3906 Gnl3l         |
| ENSMUSG00000027878 | 3907 Notch2        |
| ENSMUSG00000060038 | 3908 Dhps          |
| ENSMUSG00000050721 | 3909 Plekho2       |
| ENSMUSG00000028066 | 3910 Pmf1          |
| ENSMUSG00000031642 | 3911 Sh3rf1        |
| ENSMUSG00000025050 | 3912 Pcgf6         |
| ENSMUSG00000021681 | 3913 Aggf1         |
| ENSMUSG00000021428 | 3914 Riok1         |
| ENSMUSG00000033417 | 3915 Cacul1        |
| ENSMUSG00000021044 | 3916 Adck1         |
| ENSMUSG00000027889 | 3917 Ampd2         |
| ENSMUSG00000000374 | 3918 Trappc10      |
| ENSMUSG00000019988 | 3919 Nedd1         |
| ENSMUSG00000027962 | 3920 Vcam1         |
| ENSMUSG00000053746 | 3921 Ptrh1         |
| ENSMUSG00000034610 | 3922 Zcchc11       |
| ENSMUSG00000062604 | 3923 Srpk2         |
| ENSMUSG00000021569 | 3924 Trip13        |
| ENSMUSG00000022020 | 3925 Naa16         |
| ENSMUSG00000021514 | 3926 Zfp369        |
| ENSMUSG00000021318 | 3927 Gli3          |
| ENSMUSG00000027309 | 3928 4930402H24Rik |
| ENSMUSG00000038187 | 3929 Btbd10        |
| ENSMUSG00000029171 | 3930 Pgm1          |
| ENSMUSG00000021286 | 3931 Zfyve21       |
| ENSMUSG00000028035 | 3932 Dnajb4        |
| ENSMUSG00000001999 | 3933 Blvra         |
| ENSMUSG00000021010 | 3934 Npas3         |
| ENSMUSG00000030016 | 3935 Zfp638        |
| ENSMUSG00000026585 | 3936 Kifap3        |
| ENSMUSG00000022385 | 3937 Gtse1         |
| ENSMUSG00000042208 | 3938 0610010F05Rik |
| ENSMUSG00000074235 | 3939 Gm10649       |
| ENSMUSG00000022150 | 3940 Dab2          |
| ENSMUSG00000019998 | 3941 Stx7          |
| ENSMUSG00000086316 | 3942 2210013O21Rik |
| ENSMUSG00000033096 | 3943 Apmap         |
| ENSMUSG00000021838 | 3944 Samd4         |
| ENSMUSG00000032218 | 3945 Ccnb2         |
| ENSMUSG00000032485 | 3946 Scap          |

|                     |              |
|---------------------|--------------|
| ENSMUSG00000024429  | 3947 Gnl1    |
| ENSMUSG00000040451  | 3948 Sgms1   |
| ENSMUSG00000005233  | 3949 Spc25   |
| ENSMUSG000000067649 | 3950 Mageb18 |
| ENSMUSG00000022750  | 3951 Klhl22  |
| ENSMUSG00000002688  | 3952 Prkd1   |
| ENSMUSG000000037896 | 3953 Rcor1   |
| ENSMUSG000000037936 | 3954 Scarb1  |
| ENSMUSG00000015094  | 3955 Npdc1   |
| ENSMUSG000000039419 | 3956 Cntnap2 |
| ENSMUSG000000040599 | 3957 Mis12   |
| ENSMUSG000000027166 | 3958 Dnajc24 |
| ENSMUSG000000028373 | 3959 Astn2   |
| ENSMUSG000000020319 | 3960 Wdpcp   |
| ENSMUSG000000032423 | 3961 Syncrip |
| ENSMUSG000000022185 | 3962 Acin1   |
| ENSMUSG000000063600 | 3963 Egfem1  |
| ENSMUSG000000083716 | 3964 Gm13436 |
| ENSMUSG000000067567 | 3965 Hdac8   |
| ENSMUSG000000027312 | 3966 Atrn    |
| ENSMUSG000000030980 | 3967 Knop1   |
| ENSMUSG000000087098 | 3968 Gm11884 |
| ENSMUSG000000048327 | 3969 Ckap2l  |
| ENSMUSG000000028330 | 3970 Ncbp1   |
| ENSMUSG000000061559 | 3971 Wdr61   |
| ENSMUSG000000017561 | 3972 Crlf3   |
| ENSMUSG000000037621 | 3973 Atoh8   |
| ENSMUSG000000044252 | 3974 Osbpl1a |
| ENSMUSG000000028430 | 3975 Nol6    |
| ENSMUSG000000026571 | 3976 Dcaf6   |
| ENSMUSG000000025555 | 3977 Farp1   |
| ENSMUSG000000025332 | 3978 Kdm5c   |
| ENSMUSG000000053293 | 3979 Pom121  |
| ENSMUSG000000013465 | 3980 Nelfb   |
| ENSMUSG000000022098 | 3981 Bmp1    |
| ENSMUSG000000037993 | 3982 Dhx38   |
| ENSMUSG000000009090 | 3983 Ap1b1   |
| ENSMUSG000000022811 | 3984 Zfp148  |
| ENSMUSG000000044600 | 3985 Smim7   |
| ENSMUSG000000036879 | 3986 Phkb    |
| ENSMUSG000000038910 | 3987 Plcl2   |
| ENSMUSG000000039087 | 3988 Rreb1   |

|                     |                   |
|---------------------|-------------------|
| ENSMUSG00000045763  | 3989 Basp1        |
| ENSMUSG00000022003  | 3990 Slc25a30     |
| ENSMUSG00000057649  | 3991 Brd9         |
| ENSMUSG00000063632  | 3992 Sox11        |
| ENSMUSG00000030264  | 3993 Thumpd3      |
| ENSMUSG00000036745  | 3994 Ttl7         |
| ENSMUSG00000024764  | 3995 Naa40        |
| ENSMUSG00000036019  | 3996 Tmtc2        |
| ENSMUSG00000031479  | 3997 Vps36        |
| ENSMUSG00000041957  | 3998 Pkp2         |
| ENSMUSG00000064068  | 3999 Mtx1         |
| ENSMUSG00000050730  | 4000 Arhgap42     |
| ENSMUSG00000083833  | 4001 Gm13841      |
| ENSMUSG00000032531  | 4002 Amotl2       |
| ENSMUSG00000018428  | 4003 Akap1        |
| ENSMUSG00000004221  | 4004 Ikbkg        |
| ENSMUSG00000003279  | 4005 Dlgap1       |
| ENSMUSG00000041773  | 4006 Enc1         |
| ENSMUSG00000017760  | 4007 Ctsa         |
| ENSMUSG00000046722  | 4008 Cdc42se1     |
| ENSMUSG00000026171  | 4009 Rnf25        |
| ENSMUSG00000059327  | 4010 Eda          |
| ENSMUSG00000064302  | 4011 Clasp1       |
| ENSMUSG00000002835  | 4012 Chaf1a       |
| ENSMUSG00000085342  | 4013 Gm12254      |
| ENSMUSG00000058325  | 4014 Dock1        |
| ENSMUSG00000027199  | 4015 Gatm         |
| ENSMUSG00000028136  | 4016 Snx27        |
| ENSMUSG00000006736  | 4017 Tspan31      |
| ENSMUSG00000018417  | 4018 Myo1b        |
| ENSMUSG000000107960 | 4019 RP24-97C18.6 |
| ENSMUSG00000031782  | 4020 Coq9         |
| ENSMUSG00000030314  | 4021 Atg7         |
| ENSMUSG00000026740  | 4022 Dnajc1       |
| ENSMUSG00000055319  | 4023 Sec23ip      |
| ENSMUSG00000022761  | 4024 Lztr1        |
| ENSMUSG00000025372  | 4025 Baiap2       |
| ENSMUSG00000038379  | 4026 Ttk          |
| ENSMUSG00000055850  | 4027 Rnf181       |
| ENSMUSG00000022070  | 4028 Bora         |
| ENSMUSG00000020196  | 4029 Cabin1       |
| ENSMUSG00000061273  | 4030 Mmgt1        |



|                    |                    |
|--------------------|--------------------|
| ENSMUSG00000039842 | 4031 Mcph1         |
| ENSMUSG00000101801 | 4032 1700020G17Rik |
| ENSMUSG00000074749 | 4033 Kiz           |
| ENSMUSG00000045751 | 4034 Mms22l        |
| ENSMUSG00000100851 | 4035 Gm28928       |
| ENSMUSG00000024037 | 4036 Wdr4          |
| ENSMUSG00000019927 | 4037 Ube2d1        |
| ENSMUSG00000020755 | 4038 Sap30bp       |
| ENSMUSG00000036093 | 4039 Arl5a         |
| ENSMUSG00000019889 | 4040 Ptprk         |
| ENSMUSG00000037400 | 4041 Atp11b        |
| ENSMUSG00000031609 | 4042 Sap30         |
| ENSMUSG00000021991 | 4043 Cacna2d3      |
| ENSMUSG00000029201 | 4044 Ugdh          |
| ENSMUSG00000031451 | 4045 Gas6          |
| ENSMUSG00000036257 | 4046 Pnpla8        |
| ENSMUSG00000019990 | 4047 Pde7b         |
| ENSMUSG00000053205 | 4048 Styx          |
| ENSMUSG00000001105 | 4049 Ift20         |
| ENSMUSG00000074994 | 4050 Qser1         |
| ENSMUSG00000046873 | 4051 Mbtps2        |
| ENSMUSG00000041638 | 4052 Gcn1l1        |
| ENSMUSG00000036459 | 4053 Wtip          |
| ENSMUSG00000047221 | 4054 Fam185a       |
| ENSMUSG00000040659 | 4055 Efh2          |
| ENSMUSG00000057858 | 4056 Fam204a       |
| ENSMUSG00000014077 | 4057 Chp1          |
| ENSMUSG00000032643 | 4058 Fhl3          |
| ENSMUSG00000020716 | 4059 Nf1           |
| ENSMUSG00000038732 | 4060 Mboat1        |
| ENSMUSG00000063063 | 4061 Ctnna2        |
| ENSMUSG00000054920 | 4062 Klh5          |
| ENSMUSG00000045382 | 4063 Cxcr4         |
| ENSMUSG00000004642 | 4064 Slbp          |
| ENSMUSG00000039396 | 4065 Neil3         |
| ENSMUSG00000078619 | 4066 Smarcd2       |
| ENSMUSG00000087402 | 4067 Gm11867       |
| ENSMUSG00000022564 | 4068 Grina         |
| ENSMUSG00000039148 | 4069 Sart1         |
| ENSMUSG00000049076 | 4070 Acap2         |
| ENSMUSG00000031781 | 4071 Ciapin1       |
| ENSMUSG00000020288 | 4072 Ahsa2         |

|                     |              |
|---------------------|--------------|
| ENSMUSG00000023170  | 4073 Gps2    |
| ENSMUSG00000041375  | 4074 Ccdc9   |
| ENSMUSG00000029238  | 4075 Clock   |
| ENSMUSG00000036992  | 4076 Nxt1    |
| ENSMUSG00000061080  | 4077 Lsamp   |
| ENSMUSG00000024456  | 4078 Diap1   |
| ENSMUSG00000024856  | 4079 Cdk2ap2 |
| ENSMUSG00000030499  | 4080 Kctd15  |
| ENSMUSG00000087425  | 4081 Gm15404 |
| ENSMUSG00000003421  | 4082 Nosip   |
| ENSMUSG00000064181  | 4083 Rab3ip  |
| ENSMUSG00000049517  | 4084 Rps23   |
| ENSMUSG00000029703  | 4085 Lrwd1   |
| ENSMUSG00000027230  | 4086 Creb3l1 |
| ENSMUSG00000062110  | 4087 Scfd2   |
| ENSMUSG00000054008  | 4088 Ndst1   |
| ENSMUSG00000041769  | 4089 Ppp2r2d |
| ENSMUSG00000069135  | 4090 Fgfr1op |
| ENSMUSG00000025854  | 4091 Fam20c  |
| ENSMUSG00000011306  | 4092 Sugp1   |
| ENSMUSG00000003500  | 4093 Impdh1  |
| ENSMUSG00000024878  | 4094 Cbwd1   |
| ENSMUSG00000059278  | 4095 Naa38   |
| ENSMUSG00000052144  | 4096 Ppp4r2  |
| ENSMUSG000000105650 | 4097 Gm42889 |
| ENSMUSG00000017929  | 4098 B4galt5 |
| ENSMUSG00000039159  | 4099 Ube2h   |
| ENSMUSG00000061589  | 4100 Dot1l   |
| ENSMUSG00000090370  | 4101 Gm21989 |
| ENSMUSG00000091537  | 4102 Tma7    |
| ENSMUSG00000049940  | 4103 Pgrmc2  |
| ENSMUSG00000006288  | 4104 Ttc5    |
| ENSMUSG00000070394  | 4105 Tmem256 |
| ENSMUSG00000030327  | 4106 Necap1  |
| ENSMUSG00000040479  | 4107 Dgkz    |
| ENSMUSG00000026374  | 4108 Tsn     |
| ENSMUSG00000048758  | 4109 Rpl29   |
| ENSMUSG00000033392  | 4110 Clasp2  |
| ENSMUSG00000068329  | 4111 Htra2   |
| ENSMUSG00000070023  | 4112 Gm10283 |
| ENSMUSG00000037926  | 4113 Ssh2    |
| ENSMUSG00000016308  | 4114 Ube2a   |

|                    |                    |
|--------------------|--------------------|
| ENSMUSG00000069237 | 4115 Fam8a1        |
| ENSMUSG00000029833 | 4116 Trim24        |
| ENSMUSG00000044340 | 4117 Phlpp1        |
| ENSMUSG00000036057 | 4118 Ptpn23        |
| ENSMUSG00000028576 | 4119 Ift74         |
| ENSMUSG00000046897 | 4120 Zfp740        |
| ENSMUSG00000018378 | 4121 Cuedc1        |
| ENSMUSG00000027470 | 4122 Mylk2         |
| ENSMUSG00000018481 | 4123 Appbp2        |
| ENSMUSG00000015202 | 4124 Cnksr3        |
| ENSMUSG00000047731 | 4125 Wbp1l         |
| ENSMUSG00000032180 | 4126 Tmed1         |
| ENSMUSG00000048583 | 4127 Igf2          |
| ENSMUSG00000047881 | 4128 Rell1         |
| ENSMUSG00000035683 | 4129 Melk          |
| ENSMUSG00000038368 | 4130 Focad         |
| ENSMUSG00000019773 | 4131 Fbxo5         |
| ENSMUSG00000029394 | 4132 Cdk2ap1       |
| ENSMUSG00000024750 | 4133 Zfand5        |
| ENSMUSG00000005687 | 4134 Bcas2         |
| ENSMUSG00000060950 | 4135 Trmt61a       |
| ENSMUSG00000027540 | 4136 Ptpn1         |
| ENSMUSG00000005936 | 4137 Kctd20        |
| ENSMUSG00000086429 | 4138 Gt(ROSA)26Sor |
| ENSMUSG00000029780 | 4139 Nt5c3         |
| ENSMUSG00000034118 | 4140 Tpst1         |
| ENSMUSG00000051232 | 4141 Tmem199       |
| ENSMUSG00000020925 | 4142 Ccdc43        |
| ENSMUSG00000037907 | 4143 Ankrd13b      |
| ENSMUSG00000017664 | 4144 Slc35c2       |
| ENSMUSG00000023348 | 4145 Trip6         |
| ENSMUSG00000020899 | 4146 Pfas          |
| ENSMUSG00000087159 | 4147 Gm15246       |
| ENSMUSG00000021643 | 4148 Serf1         |
| ENSMUSG00000034210 | 4149 Efcab14       |
| ENSMUSG00000034998 | 4150 Foxn2         |
| ENSMUSG00000056222 | 4151 Spock1        |
| ENSMUSG00000038305 | 4152 Spats2l       |
| ENSMUSG00000091421 | 4153 Gm4202        |
| ENSMUSG00000019944 | 4154 Rhobtb1       |
| ENSMUSG00000020691 | 4155 Mettl2        |
| ENSMUSG00000062762 | 4156 Ei24          |

|                      |               |
|----------------------|---------------|
| ENSMUSG00000024487   | 4157 Yipf5    |
| ENSMUSG00000041014   | 4158 Nrg3     |
| ENSMUSG00000068917   | 4159 Clk2     |
| ENSMUSG00000044071   | 4160 Fam19a2  |
| ENSMUSG00000055540   | 4161 Epha6    |
| ENSMUSG00000001855   | 4162 Nup214   |
| ENSMUSG000000036160  | 4163 Surf6    |
| ENSMUSG00000021819   | 4164 Zswim8   |
| ENSMUSG00000022945   | 4165 Chaf1b   |
| ENSMUSG000000032264  | 4166 Zw10     |
| ENSMUSG000000030401  | 4167 Rtn2     |
| ENSMUSG000000045328  | 4168 Cenpe    |
| ENSMUSG000000059834  | 4169 Sclt1    |
| ENSMUSG000000039988  | 4170 Ankrd13c |
| ENSMUSG000000031109  | 4171 Enox2    |
| ENSMUSG000000017716  | 4172 Birc5    |
| ENSMUSG000000068706  | 4173 Gm10250  |
| ENSMUSG000000086948  | 4174 Gm14697  |
| ENSMUSG000000003233  | 4175 Dvl3     |
| ENSMUSG000000005802  | 4176 Slc30a4  |
| ENSMUSG000000026082  | 4177 Rev1     |
| ENSMUSG000000046311  | 4178 Zfp62    |
| ENSMUSG000000035142  | 4179 Nubpl    |
| ENSMUSG000000071041  | 4180 Gm15210  |
| ENSMUSG000000027652  | 4181 Ralgapb  |
| ENSMUSG000000020472  | 4182 Zkscan17 |
| ENSMUSG000000028826  | 4183 Tmem57   |
| ENSMUSG0000000032599 | 4184 Ip6k2    |
| ENSMUSG000000031578  | 4185 Mak16    |
| ENSMUSG000000009555  | 4186 Cdk9     |
| ENSMUSG0000000031256 | 4187 Cstf2    |
| ENSMUSG0000000033763 | 4188 Mtss1l   |
| ENSMUSG000000059486  | 4189 Kbtbd2   |
| ENSMUSG000000026289  | 4190 Atg16l1  |
| ENSMUSG000000021028  | 4191 Mbip     |
| ENSMUSG000000059669  | 4192 Taf1b    |
| ENSMUSG000000069662  | 4193 Marcks   |
| ENSMUSG000000030763  | 4194 Lcmt1    |
| ENSMUSG000000038495  | 4195 Otud7b   |
| ENSMUSG000000007603  | 4196 Dus3l    |
| ENSMUSG000000018415  | 4197 Gid4     |
| ENSMUSG000000028247  | 4198 Coq3     |

|                    |                |
|--------------------|----------------|
| ENSMUSG00000038806 | 4199 Sde2      |
| ENSMUSG00000038773 | 4200 Kdm3b     |
| ENSMUSG00000027498 | 4201 Cstf1     |
| ENSMUSG00000037573 | 4202 Tob1      |
| ENSMUSG00000049792 | 4203 Bag5      |
| ENSMUSG00000058407 | 4204 Txndc9    |
| ENSMUSG00000029577 | 4205 Ube3b     |
| ENSMUSG00000024622 | 4206 Hmgxb3    |
| ENSMUSG00000018548 | 4207 Trim37    |
| ENSMUSG00000043241 | 4208 Upf2      |
| ENSMUSG00000037369 | 4209 Kdm6a     |
| ENSMUSG00000034192 | 4210 Lsm3      |
| ENSMUSG00000039735 | 4211 Fnbp1l    |
| ENSMUSG00000030759 | 4212 Far1      |
| ENSMUSG00000029390 | 4213 Tmed2     |
| ENSMUSG00000032405 | 4214 Pias1     |
| ENSMUSG00000027806 | 4215 Tsc22d2   |
| ENSMUSG00000015290 | 4216 Ubl4a     |
| ENSMUSG00000059355 | 4217 Wdr83os   |
| ENSMUSG00000030291 | 4218 Med21     |
| ENSMUSG00000028413 | 4219 B4galt1   |
| ENSMUSG00000026586 | 4220 Prrx1     |
| ENSMUSG00000066392 | 4221 Nrnx3     |
| ENSMUSG00000022614 | 4222 Lmf2      |
| ENSMUSG00000042364 | 4223 Snx18     |
| ENSMUSG00000014850 | 4224 Msh3      |
| ENSMUSG00000048701 | 4225 Ccdc6     |
| ENSMUSG00000053347 | 4226 Zfp943    |
| ENSMUSG00000029427 | 4227 Zcchc8    |
| ENSMUSG00000031513 | 4228 Leprotl1  |
| ENSMUSG00000021518 | 4229 Ptdss1    |
| ENSMUSG00000029076 | 4230 Sdf4      |
| ENSMUSG00000086681 | 4231 Gm16178   |
| ENSMUSG00000001300 | 4232 Efnb2     |
| ENSMUSG00000067344 | 4233 Rps25-ps1 |
| ENSMUSG00000085385 | 4234 Snhg17    |
| ENSMUSG00000033365 | 4235 Ipo13     |
| ENSMUSG00000020186 | 4236 Csrp2     |
| ENSMUSG00000069020 | 4237 Urm1      |
| ENSMUSG00000030204 | 4238 Ddx47     |
| ENSMUSG00000035632 | 4239 Cnot3     |
| ENSMUSG00000020448 | 4240 Rnf185    |

|                     |                    |
|---------------------|--------------------|
| ENSMUSG00000066278  | 4241 Vps37b        |
| ENSMUSG00000036104  | 4242 Rab3gap1      |
| ENSMUSG00000026004  | 4243 Kansl1l       |
| ENSMUSG00000029826  | 4244 Zc3hav1       |
| ENSMUSG00000037375  | 4245 Hhat          |
| ENSMUSG00000011960  | 4246 Ccnt1         |
| ENSMUSG00000006134  | 4247 Crkl          |
| ENSMUSG00000085640  | 4248 Gm14064       |
| ENSMUSG00000036792  | 4249 Mbd5          |
| ENSMUSG00000043998  | 4250 Mgat2         |
| ENSMUSG00000015697  | 4251 Setdb1        |
| ENSMUSG00000020459  | 4252 Mtif2         |
| ENSMUSG000000051361 | 4253 6030498E09Rik |
| ENSMUSG00000028107  | 4254 Tars2         |
| ENSMUSG00000043019  | 4255 Edem3         |
| ENSMUSG00000020520  | 4256 Galnt10       |
| ENSMUSG00000014177  | 4257 Tvp23b        |
| ENSMUSG00000039599  | 4258 Fam149b       |
| ENSMUSG00000030659  | 4259 Nucb2         |
| ENSMUSG00000029486  | 4260 Mrpl1         |
| ENSMUSG00000024883  | 4261 Rin1          |
| ENSMUSG000000100341 | 4262 Gm29478       |
| ENSMUSG00000018239  | 4263 Zcchc10       |
| ENSMUSG00000037474  | 4264 Dtl           |
| ENSMUSG00000071424  | 4265 Grid2         |
| ENSMUSG00000052214  | 4266 Opa3          |
| ENSMUSG00000037750  | 4267 Fam222b       |
| ENSMUSG00000022680  | 4268 Pdxdc1        |
| ENSMUSG00000001366  | 4269 Fbxo9         |
| ENSMUSG00000045594  | 4270 Glb1          |
| ENSMUSG000000105811 | 4271 Gm42707       |
| ENSMUSG00000055471  | 4272 Alk           |
| ENSMUSG00000001036  | 4273 Epn2          |
| ENSMUSG00000052698  | 4274 Tln2          |
| ENSMUSG00000035505  | 4275 Cox18         |
| ENSMUSG00000097536  | 4276 2610037D02Rik |
| ENSMUSG00000038172  | 4277 Ttc39b        |
| ENSMUSG00000037949  | 4278 Ano10         |
| ENSMUSG00000031628  | 4279 Casp3         |
| ENSMUSG00000035469  | 4280 Rcbtb1        |
| ENSMUSG00000032036  | 4281 Kirrel3       |
| ENSMUSG00000018322  | 4282 Tomm34        |

|                    |                    |
|--------------------|--------------------|
| ENSMUSG00000100000 | 4283 1700023F02Rik |
| ENSMUSG00000026014 | 4284 Raph1         |
| ENSMUSG00000036617 | 4285 Etl4          |
| ENSMUSG00000039183 | 4286 Nubp2         |
| ENSMUSG00000024491 | 4287 Rbm27         |
| ENSMUSG00000049091 | 4288 Sephs2        |
| ENSMUSG00000022751 | 4289 Nit2          |
| ENSMUSG00000060475 | 4290 Wtap          |
| ENSMUSG00000036840 | 4291 Siah1a        |
| ENSMUSG00000020330 | 4292 Hmmr          |
| ENSMUSG00000054027 | 4293 Nt5dc3        |
| ENSMUSG00000106649 | 4294 AC154296.1    |
| ENSMUSG00000020099 | 4295 Unc5b         |
| ENSMUSG00000033931 | 4296 Rbm34         |
| ENSMUSG00000079435 | 4297 Rpl36a        |
| ENSMUSG00000041235 | 4298 Chd7          |
| ENSMUSG00000055799 | 4299 Tcf7l1        |
| ENSMUSG00000047495 | 4300 Dlgap2        |
| ENSMUSG00000023791 | 4301 Pigx          |
| ENSMUSG00000028099 | 4302 Polr3c        |
| ENSMUSG00000005483 | 4303 Dnajb1        |
| ENSMUSG00000033712 | 4304 Ccar2         |
| ENSMUSG00000004508 | 4305 Gab2          |
| ENSMUSG00000037572 | 4306 Wdhd1         |
| ENSMUSG00000021936 | 4307 Mapk8         |
| ENSMUSG00000021975 | 4308 Ints9         |
| ENSMUSG00000041923 | 4309 Nol4          |
| ENSMUSG00000008450 | 4310 Nutf2         |
| ENSMUSG00000023505 | 4311 Cdca3         |
| ENSMUSG00000066735 | 4312 Vkorc1l1      |
| ENSMUSG00000079003 | 4313 Samd1         |
| ENSMUSG00000025078 | 4314 Nhlrc2        |
| ENSMUSG00000045777 | 4315 Ifitm10       |
| ENSMUSG00000021224 | 4316 Numb          |
| ENSMUSG00000037174 | 4317 Elf2          |
| ENSMUSG00000039004 | 4318 Bmp6          |
| ENSMUSG00000037940 | 4319 Inpp4b        |
| ENSMUSG00000022555 | 4320 Dgat1         |
| ENSMUSG00000040875 | 4321 Osbpl10       |
| ENSMUSG00000021552 | 4322 Gkap1         |
| ENSMUSG00000025477 | 4323 Inpp5a        |
| ENSMUSG00000034158 | 4324 Lrrc58        |

|                    |                    |
|--------------------|--------------------|
| ENSMUSG00000031189 | 4325 Aff2          |
| ENSMUSG00000002055 | 4326 Spag5         |
| ENSMUSG00000025880 | 4327 Smad7         |
| ENSMUSG00000039601 | 4328 Rcan2         |
| ENSMUSG00000071660 | 4329 Ttc9c         |
| ENSMUSG00000101348 | 4330 Gm7135        |
| ENSMUSG00000027361 | 4331 Gabpb1        |
| ENSMUSG00000044627 | 4332 Swi5          |
| ENSMUSG00000031154 | 4333 Otud5         |
| ENSMUSG00000029364 | 4334 Wsb2          |
| ENSMUSG00000032127 | 4335 Vps11         |
| ENSMUSG00000033991 | 4336 Ttc37         |
| ENSMUSG00000033510 | 4337 Otud7a        |
| ENSMUSG00000102141 | 4338 Gm3952        |
| ENSMUSG00000044763 | 4339 Trmt10c       |
| ENSMUSG00000028398 | 4340 Tmem261       |
| ENSMUSG00000085301 | 4341 Gm12132       |
| ENSMUSG00000093904 | 4342 Tomm20        |
| ENSMUSG00000023988 | 4343 Bysl          |
| ENSMUSG00000034168 | 4344 Irf2bpl       |
| ENSMUSG00000031807 | 4345 Pgl3          |
| ENSMUSG00000033809 | 4346 Alg3          |
| ENSMUSG00000099869 | 4347 1700030F04Rik |
| ENSMUSG00000040029 | 4348 Ipo8          |
| ENSMUSG00000038900 | 4349 Rpl12         |
| ENSMUSG00000022641 | 4350 Bbx           |
| ENSMUSG00000030583 | 4351 Sipa1l3       |
| ENSMUSG00000040524 | 4352 Zfp609        |
| ENSMUSG00000018001 | 4353 Cyth3         |
| ENSMUSG00000056755 | 4354 Grm7          |
| ENSMUSG00000032316 | 4355 Clk3          |
| ENSMUSG00000028329 | 4356 Xpa           |
| ENSMUSG00000025019 | 4357 Lcor          |
| ENSMUSG00000027641 | 4358 Rbl1          |
| ENSMUSG00000023156 | 4359 Rpp14         |
| ENSMUSG00000040888 | 4360 Gfer          |
| ENSMUSG00000087089 | 4361 Gm12160       |
| ENSMUSG00000042572 | 4362 Ube2q1        |
| ENSMUSG00000030801 | 4363 Kat8          |
| ENSMUSG00000038619 | 4364 Ensa          |
| ENSMUSG00000030201 | 4365 Lrp6          |
| ENSMUSG00000019261 | 4366 Map1s         |



|                     |                    |
|---------------------|--------------------|
| ENSMUSG00000029071  | 4367 Dvl1          |
| ENSMUSG00000014601  | 4368 Strip1        |
| ENSMUSG00000015575  | 4369 Atp6v0e       |
| ENSMUSG000000087679 | 4370 C330006A16Rik |
| ENSMUSG000000087403 | 4371 Kantr         |
| ENSMUSG00000040771  | 4372 Oard1         |
| ENSMUSG00000029267  | 4373 Mtf2          |
| ENSMUSG00000024073  | 4374 Birc6         |
| ENSMUSG00000021891  | 4375 Mettl6        |
| ENSMUSG00000022466  | 4376 Rpap3         |
| ENSMUSG00000031878  | 4377 Nae1          |
| ENSMUSG00000025212  | 4378 Sfxn3         |
| ENSMUSG00000031561  | 4379 Tenm3         |
| ENSMUSG00000020738  | 4380 Sumo2         |
| ENSMUSG00000027488  | 4381 Snta1         |
| ENSMUSG00000020430  | 4382 Pes1          |
| ENSMUSG00000026810  | 4383 Dpm2          |
| ENSMUSG00000023827  | 4384 Agpat4        |
| ENSMUSG00000023151  | 4385 Lrrc69        |
| ENSMUSG000000108532 | 4386 RP23-231J2.1  |
| ENSMUSG00000034165  | 4387 Ccnd3         |
| ENSMUSG000000059518 | 4388 Znhit1        |
| ENSMUSG000000084159 | 4389 Gm12696       |
| ENSMUSG000000053799 | 4390 Exoc6         |
| ENSMUSG000000028645 | 4391 Slc2a1        |
| ENSMUSG000000068856 | 4392 Sf3b4         |
| ENSMUSG000000033808 | 4393 Tmem87a       |
| ENSMUSG000000023830 | 4394 Igf2r         |
| ENSMUSG000000042901 | 4395 Aida          |
| ENSMUSG000000031756 | 4396 Cenpn         |
| ENSMUSG000000020109 | 4397 Dnajb12       |
| ENSMUSG000000039987 | 4398 Phtf2         |
| ENSMUSG000000037933 | 4399 Bcd2          |
| ENSMUSG000000036983 | 4400 Tfb1m         |
| ENSMUSG000000030157 | 4401 Clec2d        |
| ENSMUSG000000024163 | 4402 Mapk8ip3      |
| ENSMUSG000000054716 | 4403 Zfp771        |
| ENSMUSG000000022177 | 4404 Haus4         |
| ENSMUSG000000024687 | 4405 Osbp          |
| ENSMUSG000000029625 | 4406 Cpsf4         |
| ENSMUSG000000031983 | 4407 2310022B05Rik |
| ENSMUSG000000029640 | 4408 Usp12         |

|                     |                    |
|---------------------|--------------------|
| ENSMUSG00000001376  | 4409 Ccdc132       |
| ENSMUSG000000028410 | 4410 Dnaja1        |
| ENSMUSG000000024962 | 4411 Vegfb         |
| ENSMUSG000000032253 | 4412 Phip          |
| ENSMUSG000000068921 | 4413 Dap3          |
| ENSMUSG000000030304 | 4414 Ergic2        |
| ENSMUSG000000038302 | 4415 Lace1         |
| ENSMUSG000000022951 | 4416 Rcan1         |
| ENSMUSG000000032193 | 4417 Ldlr          |
| ENSMUSG000000035441 | 4418 Myo1d         |
| ENSMUSG000000008763 | 4419 Man1a2        |
| ENSMUSG000000037060 | 4420 Prkcdbp       |
| ENSMUSG000000039285 | 4421 Azi2          |
| ENSMUSG000000030346 | 4422 Rad51ap1      |
| ENSMUSG000000093483 | 4423 AA465934      |
| ENSMUSG000000040481 | 4424 Bptf          |
| ENSMUSG000000044148 | 4425 1810030007Rik |
| ENSMUSG000000036860 | 4426 Mrpl55        |
| ENSMUSG000000033871 | 4427 Ppargc1b      |
| ENSMUSG000000004931 | 4428 Apba3         |
| ENSMUSG000000097312 | 4429 Gm26870       |
| ENSMUSG000000041264 | 4430 Uspl1         |
| ENSMUSG000000026748 | 4431 Plxdc2        |
| ENSMUSG000000060073 | 4432 Psma3         |
| ENSMUSG000000038267 | 4433 Slc22a23      |
| ENSMUSG000000021714 | 4434 Cenpk         |
| ENSMUSG000000066415 | 4435 Msl2          |
| ENSMUSG000000027799 | 4436 Nbea          |
| ENSMUSG000000086644 | 4437 Gm13470       |
| ENSMUSG000000029177 | 4438 Cenpa         |
| ENSMUSG000000063800 | 4439 Prpf38a       |
| ENSMUSG000000026109 | 4440 Tmeff2        |
| ENSMUSG000000090399 | 4441 Gm38399       |
| ENSMUSG000000036989 | 4442 Trim3         |
| ENSMUSG000000105195 | 4443 Gm43584       |
| ENSMUSG000000031502 | 4444 Col4a1        |
| ENSMUSG000000024486 | 4445 Hbegf         |
| ENSMUSG000000023008 | 4446 Fmnl3         |
| ENSMUSG000000042737 | 4447 Dpm3          |
| ENSMUSG000000093538 | 4448 Gm20711       |
| ENSMUSG000000039242 | 4449 B3galnt2      |
| ENSMUSG000000033416 | 4450 Gucd1         |

|                    |                    |
|--------------------|--------------------|
| ENSMUSG00000025144 | 4451 Stra13        |
| ENSMUSG00000022364 | 4452 Tbc1d31       |
| ENSMUSG00000057411 | 4453 Fam173a       |
| ENSMUSG00000028772 | 4454 Zcchc17       |
| ENSMUSG00000024955 | 4455 Esrra         |
| ENSMUSG00000019297 | 4456 Nop9          |
| ENSMUSG00000022174 | 4457 Dad1          |
| ENSMUSG00000031930 | 4458 Wwp2          |
| ENSMUSG00000020473 | 4459 Aebp1         |
| ENSMUSG00000085655 | 4460 Gm15952       |
| ENSMUSG00000004864 | 4461 Mapk13        |
| ENSMUSG00000041328 | 4462 Pcf11         |
| ENSMUSG00000052372 | 4463 Il1rapl1      |
| ENSMUSG00000020611 | 4464 Gna13         |
| ENSMUSG00000028402 | 4465 Mpdz          |
| ENSMUSG00000023232 | 4466 Serinc2       |
| ENSMUSG00000041126 | 4467 H2afv         |
| ENSMUSG00000037262 | 4468 Kin           |
| ENSMUSG00000078429 | 4469 Ctdsp2        |
| ENSMUSG00000020063 | 4470 Sirt1         |
| ENSMUSG00000017721 | 4471 Pigt          |
| ENSMUSG00000044456 | 4472 Rin3          |
| ENSMUSG00000067377 | 4473 Tspan6        |
| ENSMUSG00000020366 | 4474 Mapk9         |
| ENSMUSG00000026596 | 4475 Abl2          |
| ENSMUSG00000028165 | 4476 Cisd2         |
| ENSMUSG00000052534 | 4477 Pbx1          |
| ENSMUSG00000033021 | 4478 Gmppa         |
| ENSMUSG00000068151 | 4479 A230006K03Rik |
| ENSMUSG00000028779 | 4480 Pef1          |
| ENSMUSG00000028703 | 4481 Lrrc41        |
| ENSMUSG00000004347 | 4482 Pde1c         |
| ENSMUSG00000022064 | 4483 Pibf1         |
| ENSMUSG00000033308 | 4484 Dpyd          |
| ENSMUSG00000085945 | 4485 2310014F06Rik |
| ENSMUSG00000023994 | 4486 Nfya          |
| ENSMUSG00000051978 | 4487 Erich1        |
| ENSMUSG00000024604 | 4488 Rbm22         |
| ENSMUSG00000020572 | 4489 Nampt         |
| ENSMUSG00000036103 | 4490 Colec12       |
| ENSMUSG00000024236 | 4491 Svil          |
| ENSMUSG00000028830 | 4492 AU040320      |

|                    |                    |
|--------------------|--------------------|
| ENSMUSG00000040688 | 4493 Tbl3          |
| ENSMUSG00000049119 | 4494 Fam110b       |
| ENSMUSG00000025747 | 4495 Tyms          |
| ENSMUSG00000028495 | 4496 Rps6          |
| ENSMUSG00000097537 | 4497 2610020C07Rik |
| ENSMUSG00000020889 | 4498 Nr1d1         |
| ENSMUSG00000024414 | 4499 Mrpl27        |
| ENSMUSG00000006335 | 4500 Tfpt          |
| ENSMUSG00000002808 | 4501 Epdr1         |
| ENSMUSG00000032985 | 4502 5730522E02Rik |
| ENSMUSG00000018995 | 4503 Nars2         |
| ENSMUSG00000024370 | 4504 Cdc23         |
| ENSMUSG00000026721 | 4505 Rabgap1l      |
| ENSMUSG00000038664 | 4506 Herc1         |
| ENSMUSG00000042426 | 4507 Dhx29         |
| ENSMUSG00000059995 | 4508 Atxn7l3       |
| ENSMUSG00000047866 | 4509 Lonp2         |
| ENSMUSG00000030653 | 4510 Pde2a         |
| ENSMUSG00000020346 | 4511 Mgat1         |
| ENSMUSG00000020776 | 4512 Fbf1          |
| ENSMUSG00000047989 | 4513 Ino80c        |
| ENSMUSG00000059981 | 4514 Taok2         |
| ENSMUSG00000032615 | 4515 Nt5m          |
| ENSMUSG00000036867 | 4516 Smad6         |
| ENSMUSG00000022779 | 4517 Top3b         |
| ENSMUSG00000043542 | 4518 Zc2hc1a       |
| ENSMUSG00000086136 | 4519 Gm12718       |
| ENSMUSG00000036646 | 4520 Man1b1        |
| ENSMUSG00000042302 | 4521 Ehbp1         |
| ENSMUSG00000036376 | 4522 Abt1          |
| ENSMUSG00000047804 | 4523 Akap10        |
| ENSMUSG00000032059 | 4524 Alg9          |
| ENSMUSG00000021969 | 4525 Zdhhc20       |
| ENSMUSG00000024925 | 4526 Rnaseh2c      |
| ENSMUSG00000027204 | 4527 Fbn1          |
| ENSMUSG00000025521 | 4528 Tmem192       |
| ENSMUSG00000054226 | 4529 Tprkb         |
| ENSMUSG00000087292 | 4530 Gm13832       |
| ENSMUSG00000031617 | 4531 Tmem184c      |
| ENSMUSG00000042694 | 4532 Obfc1         |
| ENSMUSG00000035529 | 4533 Prdm4         |
| ENSMUSG00000032849 | 4534 Abcc4         |

|                     |                    |
|---------------------|--------------------|
| ENSMUSG00000028832  | 4535 Stmn1         |
| ENSMUSG00000071074  | 4536 Yipf3         |
| ENSMUSG00000025579  | 4537 Gaa           |
| ENSMUSG00000012609  | 4538 Ttl5          |
| ENSMUSG00000031523  | 4539 Dlc1          |
| ENSMUSG00000021400  | 4540 Wrnip1        |
| ENSMUSG00000020790  | 4541 Ankfy1        |
| ENSMUSG00000042472  | 4542 Zfp410        |
| ENSMUSG00000039697  | 4543 Ncoa7         |
| ENSMUSG00000028461  | 4544 Ccdc107       |
| ENSMUSG00000041975  | 4545 Mettl8        |
| ENSMUSG00000004446  | 4546 Bid           |
| ENSMUSG000000056553 | 4547 Ptpn2         |
| ENSMUSG000000083240 | 4548 Gm13453       |
| ENSMUSG000000102789 | 4549 Gm38256       |
| ENSMUSG000000025085 | 4550 Ablim1        |
| ENSMUSG000000042298 | 4551 Ttc19         |
| ENSMUSG000000025421 | 4552 Hdhd2         |
| ENSMUSG000000021076 | 4553 Actr10        |
| ENSMUSG00000001018  | 4554 Snapin        |
| ENSMUSG000000051616 | 4555 C230029F24Rik |
| ENSMUSG000000033623 | 4556 Pcgf3         |
| ENSMUSG000000025237 | 4557 Parp6         |
| ENSMUSG000000034265 | 4558 Zdhhc14       |
| ENSMUSG000000026277 | 4559 Stk25         |
| ENSMUSG000000026849 | 4560 Tor1a         |
| ENSMUSG000000036009 | 4561 Mettl25       |
| ENSMUSG000000024867 | 4562 Pip5k1b       |
| ENSMUSG000000024477 | 4563 Pgmt1b        |
| ENSMUSG000000060288 | 4564 Ppih          |
| ENSMUSG000000039449 | 4565 Prpf18        |
| ENSMUSG000000003355 | 4566 Fkbp11        |
| ENSMUSG000000071252 | 4567 2210408I21Rik |
| ENSMUSG000000038671 | 4568 Arfrp1        |
| ENSMUSG000000033004 | 4569 Mycbp2        |
| ENSMUSG000000013663 | 4570 Pten          |
| ENSMUSG000000093514 | 4571 Gm28727       |
| ENSMUSG000000041164 | 4572 Zmiz2         |
| ENSMUSG000000045312 | 4573 Lhfpl2        |
| ENSMUSG000000004451 | 4574 Ralb          |
| ENSMUSG000000030986 | 4575 Dhx32         |
| ENSMUSG000000042272 | 4576 Sestd1        |

|                     |                    |
|---------------------|--------------------|
| ENSMUSG00000018076  | 4577 Med13l        |
| ENSMUSG00000001524  | 4578 Gtf2h4        |
| ENSMUSG000000046159 | 4579 Chrm3         |
| ENSMUSG000000026029 | 4580 Casp8         |
| ENSMUSG00000001211  | 4581 Agpat3        |
| ENSMUSG000000035069 | 4582 Oma1          |
| ENSMUSG000000049658 | 4583 Bdp1          |
| ENSMUSG000000025089 | 4584 Gfra1         |
| ENSMUSG000000039047 | 4585 Pigk          |
| ENSMUSG000000033545 | 4586 Znrf1         |
| ENSMUSG000000071649 | 4587 B3gat3        |
| ENSMUSG000000048271 | 4588 Rbm33         |
| ENSMUSG000000005299 | 4589 Letm1         |
| ENSMUSG000000041112 | 4590 Elmo1         |
| ENSMUSG000000044167 | 4591 Foxo1         |
| ENSMUSG000000085622 | 4592 3110056K07Rik |
| ENSMUSG000000035024 | 4593 Ncapd3        |
| ENSMUSG000000034908 | 4594 Sidt2         |
| ENSMUSG000000020715 | 4595 Ern1          |
| ENSMUSG000000034931 | 4596 Dhx8          |
| ENSMUSG000000064090 | 4597 Vrk2          |
| ENSMUSG000000027882 | 4598 Stxbp3        |
| ENSMUSG000000034525 | 4599 Ice1          |
| ENSMUSG000000079316 | 4600 Rab9          |
| ENSMUSG000000059474 | 4601 Mbtd1         |
| ENSMUSG000000051557 | 4602 Pust1         |
| ENSMUSG000000072501 | 4603 Phf20l1       |
| ENSMUSG000000023953 | 4604 Polh          |
| ENSMUSG000000009535 | 4605 Rnmt          |
| ENSMUSG000000054640 | 4606 Slc8a1        |
| ENSMUSG000000055817 | 4607 Mta3          |
| ENSMUSG000000028678 | 4608 Kif2c         |
| ENSMUSG000000018819 | 4609 Lsp1          |
| ENSMUSG000000030268 | 4610 Bcat1         |
| ENSMUSG000000026049 | 4611 Tex30         |
| ENSMUSG000000024795 | 4612 Kif20b        |
| ENSMUSG000000022498 | 4613 Txndc11       |
| ENSMUSG000000031314 | 4614 Taf1          |
| ENSMUSG000000052155 | 4615 Acvr2a        |
| ENSMUSG000000001521 | 4616 Tulp3         |
| ENSMUSG000000000184 | 4617 Ccnd2         |
| ENSMUSG000000022637 | 4618 Cblb          |

|                    |                    |
|--------------------|--------------------|
| ENSMUSG00000025395 | 4619 Prim1         |
| ENSMUSG00000051319 | 4620 1500011K16Rik |
| ENSMUSG00000039166 | 4621 Akap7         |
| ENSMUSG00000024070 | 4622 Prkd3         |
| ENSMUSG00000027668 | 4623 Mfn1          |
| ENSMUSG00000034889 | 4624 Cactin        |
| ENSMUSG00000024889 | 4625 Rce1          |
| ENSMUSG00000040433 | 4626 Zbtb38        |
| ENSMUSG00000040407 | 4627 Akap9         |
| ENSMUSG00000035949 | 4628 Fbxw2         |
| ENSMUSG00000021987 | 4629 Mtmr6         |
| ENSMUSG00000055980 | 4630 Irs1          |
| ENSMUSG00000028719 | 4631 Cmpk1         |
| ENSMUSG00000038369 | 4632 Ncoa6         |
| ENSMUSG00000020894 | 4633 Vamp2         |
| ENSMUSG00000041124 | 4634 Msantd4       |
| ENSMUSG00000047045 | 4635 Tmem164       |
| ENSMUSG00000026425 | 4636 Srgap2        |
| ENSMUSG00000014907 | 4637 Naf1          |
| ENSMUSG00000058126 | 4638 Tpm3-rs7      |
| ENSMUSG00000022280 | 4639 Rnf19a        |
| ENSMUSG00000044857 | 4640 Lemd2         |
| ENSMUSG00000031060 | 4641 Rbm10         |
| ENSMUSG00000027247 | 4642 Arhgap1       |
| ENSMUSG00000025371 | 4643 Chmp6         |
| ENSMUSG00000042215 | 4644 Bag2          |
| ENSMUSG00000022571 | 4645 Pycrl         |
| ENSMUSG00000026520 | 4646 Pycr2         |
| ENSMUSG00000027936 | 4647 Crtc2         |
| ENSMUSG00000028898 | 4648 Trnau1ap      |
| ENSMUSG00000022089 | 4649 Bin3          |
| ENSMUSG00000025239 | 4650 Limd1         |
| ENSMUSG00000065282 | 4651 Gm24455       |
| ENSMUSG00000051256 | 4652 Jagn1         |
| ENSMUSG00000035139 | 4653 Secisbp2      |
| ENSMUSG00000035278 | 4654 Plekhj1       |
| ENSMUSG00000018395 | 4655 Kif3a         |
| ENSMUSG00000026047 | 4656 Kdelc1        |
| ENSMUSG00000000759 | 4657 Tubgcp3       |
| ENSMUSG00000037720 | 4658 Tmem33        |
| ENSMUSG00000042626 | 4659 Shc1          |
| ENSMUSG00000035992 | 4660 Fnip1         |

|                    |                    |
|--------------------|--------------------|
| ENSMUSG00000026028 | 4661 Trak2         |
| ENSMUSG00000027630 | 4662 Tbl1xr1       |
| ENSMUSG00000029822 | 4663 Osbpl3        |
| ENSMUSG00000032171 | 4664 Pin1          |
| ENSMUSG00000030987 | 4665 Stim1         |
| ENSMUSG00000042210 | 4666 Abhd14a       |
| ENSMUSG00000057440 | 4667 Mpp7          |
| ENSMUSG00000024056 | 4668 Ndc80         |
| ENSMUSG00000029462 | 4669 Vps29         |
| ENSMUSG00000038212 | 4670 Hiatl1        |
| ENSMUSG00000030880 | 4671 Polr3e        |
| ENSMUSG00000073991 | 4672 Cnbd1         |
| ENSMUSG00000028033 | 4673 Kcnq5         |
| ENSMUSG00000025817 | 4674 Nudt5         |
| ENSMUSG00000085569 | 4675 Gm12602       |
| ENSMUSG00000005871 | 4676 Apc           |
| ENSMUSG00000035914 | 4677 Cd276         |
| ENSMUSG00000030872 | 4678 Gga2          |
| ENSMUSG00000024158 | 4679 Hagh          |
| ENSMUSG00000071757 | 4680 Zhx2          |
| ENSMUSG00000020674 | 4681 Pxdn          |
| ENSMUSG00000022016 | 4682 Akap11        |
| ENSMUSG00000028700 | 4683 Pomgnt1       |
| ENSMUSG00000051671 | 4684 Coa6          |
| ENSMUSG00000032883 | 4685 Acsl3         |
| ENSMUSG00000004567 | 4686 Mcoln1        |
| ENSMUSG00000055044 | 4687 Pdlim1        |
| ENSMUSG00000047044 | 4688 D030056L22Rik |
| ENSMUSG00000072294 | 4689 Klf12         |
| ENSMUSG00000029020 | 4690 Mfn2          |
| ENSMUSG00000025437 | 4691 Usp33         |
| ENSMUSG00000035212 | 4692 Leprot        |
| ENSMUSG00000036333 | 4693 Kidins220     |
| ENSMUSG00000026737 | 4694 Pip4k2a       |
| ENSMUSG00000027397 | 4695 Slc20a1       |
| ENSMUSG00000017765 | 4696 Slc12a4       |
| ENSMUSG00000035798 | 4697 Zdhhc17       |
| ENSMUSG00000024431 | 4698 Nr3c1         |
| ENSMUSG00000021774 | 4699 Ube2e1        |
| ENSMUSG00000049800 | 4700 Sertad2       |
| ENSMUSG00000031527 | 4701 Eri1          |
| ENSMUSG00000037461 | 4702 Ints7         |



|                    |                    |
|--------------------|--------------------|
| ENSMUSG00000022553 | 4703 Maf1          |
| ENSMUSG00000027200 | 4704 Sema6d        |
| ENSMUSG00000069729 | 4705 Arid1b        |
| ENSMUSG00000016833 | 4706 Mrps18c       |
| ENSMUSG00000031792 | 4707 Usb1          |
| ENSMUSG00000053219 | 4708 Raet1e        |
| ENSMUSG00000047824 | 4709 Pygo2         |
| ENSMUSG00000018209 | 4710 Stk4          |
| ENSMUSG00000030077 | 4711 Chl1          |
| ENSMUSG00000026851 | 4712 BC005624      |
| ENSMUSG00000007777 | 4713 0610009B22Rik |
| ENSMUSG00000062797 | 4714 l7Rn6         |
| ENSMUSG00000029993 | 4715 Nfu1          |
| ENSMUSG00000049106 | 4716 Dcaf5         |
| ENSMUSG00000034813 | 4717 Grip1         |
| ENSMUSG00000022724 | 4718 Mina          |
| ENSMUSG00000005886 | 4719 Ncoa2         |
| ENSMUSG00000044712 | 4720 Slc38a6       |
| ENSMUSG00000027714 | 4721 Exosc9        |
| ENSMUSG00000018217 | 4722 Pmp22         |
| ENSMUSG00000021192 | 4723 Golga5        |
| ENSMUSG00000063317 | 4724 Usp31         |
| ENSMUSG00000032400 | 4725 Zwilch        |
| ENSMUSG00000024601 | 4726 Isoc1         |
| ENSMUSG00000058546 | 4727 Rpl23a        |
| ENSMUSG00000018809 | 4728 Smyd4         |
| ENSMUSG00000045427 | 4729 Hnrnp2        |
| ENSMUSG00000041712 | 4730 Ubr7          |
| ENSMUSG00000052812 | 4731 Atad2b        |
| ENSMUSG00000043067 | 4732 Dpy19l1       |
| ENSMUSG00000017802 | 4733 Fam134c       |
| ENSMUSG00000050900 | 4734 Gm7327        |
| ENSMUSG00000051359 | 4735 Ncald         |
| ENSMUSG00000026159 | 4736 Agfg1         |
| ENSMUSG00000007613 | 4737 Tgfbr1        |
| ENSMUSG00000024422 | 4738 Dhx16         |
| ENSMUSG00000029466 | 4739 Anapc7        |
| ENSMUSG00000025525 | 4740 Apool         |
| ENSMUSG00000013236 | 4741 Ptprs         |
| ENSMUSG00000064254 | 4742 Ethe1         |
| ENSMUSG00000028232 | 4743 Tmem68        |
| ENSMUSG00000033209 | 4744 Ttc28         |

|                    |                    |
|--------------------|--------------------|
| ENSMUSG00000032477 | 4745 Cdc25a        |
| ENSMUSG00000037443 | 4746 Cep85         |
| ENSMUSG00000024926 | 4747 Kat5          |
| ENSMUSG00000029012 | 4748 Orc5          |
| ENSMUSG00000037533 | 4749 Rapgef6       |
| ENSMUSG00000041415 | 4750 Dicer1        |
| ENSMUSG00000003184 | 4751 Irf3          |
| ENSMUSG00000037808 | 4752 Fam76b        |
| ENSMUSG00000030103 | 4753 Bhlhe40       |
| ENSMUSG00000001962 | 4754 Fam50a        |
| ENSMUSG00000036503 | 4755 Rnf13         |
| ENSMUSG00000028080 | 4756 Lrba          |
| ENSMUSG00000067336 | 4757 Bmpr2         |
| ENSMUSG00000022559 | 4758 Fbxl6         |
| ENSMUSG00000020235 | 4759 Fzr1          |
| ENSMUSG00000039967 | 4760 Zfp292        |
| ENSMUSG00000047539 | 4761 Fbxo28        |
| ENSMUSG00000028191 | 4762 Bcl10         |
| ENSMUSG00000045216 | 4763 Hs6st1        |
| ENSMUSG00000086128 | 4764 St8sia3os     |
| ENSMUSG00000015971 | 4765 Actr8         |
| ENSMUSG00000031813 | 4766 Mvb12a        |
| ENSMUSG00000026683 | 4767 Nuf2          |
| ENSMUSG00000031731 | 4768 Ap1g1         |
| ENSMUSG00000002885 | 4769 Adgre5        |
| ENSMUSG00000020388 | 4770 Pdlim4        |
| ENSMUSG00000020303 | 4771 Stc2          |
| ENSMUSG00000034263 | 4772 Vwa9          |
| ENSMUSG00000030058 | 4773 Copg1         |
| ENSMUSG00000036053 | 4774 Fmn12         |
| ENSMUSG00000033960 | 4775 9430020K01Rik |
| ENSMUSG00000020455 | 4776 Trim11        |
| ENSMUSG00000040435 | 4777 Ppp1r15a      |
| ENSMUSG00000022051 | 4778 Bnip3l        |
| ENSMUSG00000026640 | 4779 Plxna2        |
| ENSMUSG00000025429 | 4780 Pstpip2       |
| ENSMUSG00000030102 | 4781 Itpr1         |
| ENSMUSG00000003234 | 4782 Abcf3         |
| ENSMUSG00000022105 | 4783 Rb1           |
| ENSMUSG00000023286 | 4784 Ube2j2        |
| ENSMUSG00000019888 | 4785 Mgat4c        |
| ENSMUSG00000016481 | 4786 Cr1l          |

|                    |                    |
|--------------------|--------------------|
| ENSMUSG00000079508 | 4787 Apoo          |
| ENSMUSG00000025782 | 4788 Taf3          |
| ENSMUSG00000039747 | 4789 Orai2         |
| ENSMUSG00000006931 | 4790 P3h4          |
| ENSMUSG00000085915 | 4791 Gm8091        |
| ENSMUSG00000054091 | 4792 1810037I17Rik |
| ENSMUSG00000020648 | 4793 Dus4l         |
| ENSMUSG00000026655 | 4794 Fam107b       |
| ENSMUSG00000003161 | 4795 Sri           |
| ENSMUSG00000037103 | 4796 Dcaf15        |
| ENSMUSG00000027378 | 4797 Nphp1         |
| ENSMUSG00000024725 | 4798 Ostf1         |
| ENSMUSG00000028617 | 4799 Lrrc42        |
| ENSMUSG00000031671 | 4800 Setd6         |
| ENSMUSG00000035161 | 4801 Ints6         |
| ENSMUSG00000071064 | 4802 Zfp827        |
| ENSMUSG00000086649 | 4803 Gm15286       |
| ENSMUSG00000039621 | 4804 Prex1         |
| ENSMUSG00000062421 | 4805 Arf2          |
| ENSMUSG00000023075 | 4806 Akirin1       |
| ENSMUSG00000026098 | 4807 Pms1          |
| ENSMUSG00000055027 | 4808 Smyd1         |
| ENSMUSG00000022521 | 4809 Crebbp        |
| ENSMUSG00000036285 | 4810 Noa1          |
| ENSMUSG00000042502 | 4811 Cd2bp2        |
| ENSMUSG00000025470 | 4812 Zfp511        |
| ENSMUSG00000011256 | 4813 Adam19        |
| ENSMUSG00000022390 | 4814 Zc3h7b        |
| ENSMUSG00000041377 | 4815 Ninj2         |
| ENSMUSG00000026411 | 4816 Tmem9         |
| ENSMUSG00000031935 | 4817 Med17         |
| ENSMUSG00000087172 | 4818 Gm12153       |
| ENSMUSG00000071477 | 4819 Zfp777        |
| ENSMUSG00000032932 | 4820 Hspa13        |
| ENSMUSG00000026662 | 4821 Sephs1        |
| ENSMUSG00000027180 | 4822 Fbxo3         |
| ENSMUSG00000009621 | 4823 Vav2          |
| ENSMUSG00000040560 | 4824 Wdr7          |
| ENSMUSG00000034203 | 4825 Chchd4        |
| ENSMUSG00000032867 | 4826 Fbxw8         |
| ENSMUSG00000026248 | 4827 Mrpl44        |
| ENSMUSG00000025157 | 4828 Zdhhc16       |

|                    |                    |
|--------------------|--------------------|
| ENSMUSG00000019139 | 4829 Isyna1        |
| ENSMUSG00000073468 | 4830 Sft2d1        |
| ENSMUSG00000027425 | 4831 Csrp2bp       |
| ENSMUSG00000027905 | 4832 Ddx20         |
| ENSMUSG00000100511 | 4833 1700111N16Rik |
| ENSMUSG00000035629 | 4834 1700021K19Rik |
| ENSMUSG00000040128 | 4835 Pnrc1         |
| ENSMUSG00000019806 | 4836 Aig1          |
| ENSMUSG00000026634 | 4837 Angel2        |
| ENSMUSG00000049659 | 4838 Aftph         |
| ENSMUSG00000062232 | 4839 Rapgef2       |
| ENSMUSG00000074781 | 4840 Ube2n         |
| ENSMUSG00000036432 | 4841 Siah2         |
| ENSMUSG00000048307 | 4842 Ankrd46       |
| ENSMUSG00000033213 | 4843 AA467197      |
| ENSMUSG00000024376 | 4844 Epb41l4a      |
| ENSMUSG00000021782 | 4845 Dlg5          |
| ENSMUSG00000066456 | 4846 Hmgn3         |
| ENSMUSG00000031928 | 4847 Mre11a        |
| ENSMUSG00000020823 | 4848 Sec14l1       |
| ENSMUSG00000039117 | 4849 Taf4a         |
| ENSMUSG00000041431 | 4850 Ccnb1         |
| ENSMUSG00000000301 | 4851 Pemt          |
| ENSMUSG00000033257 | 4852 Ttll4         |
| ENSMUSG00000020009 | 4853 Ifngr1        |
| ENSMUSG00000029676 | 4854 Pot1a         |
| ENSMUSG00000029185 | 4855 Fam114a1      |
| ENSMUSG00000034640 | 4856 Tiparp        |
| ENSMUSG00000022887 | 4857 Masp1         |
| ENSMUSG00000001134 | 4858 Uxt           |
| ENSMUSG00000019952 | 4859 Poc1b         |
| ENSMUSG00000049957 | 4860 Ccdc137       |
| ENSMUSG00000026960 | 4861 Arl6ip6       |
| ENSMUSG00000024668 | 4862 Sdhaf2        |
| ENSMUSG00000032449 | 4863 Slc25a36      |
| ENSMUSG00000040990 | 4864 Sh3kbp1       |
| ENSMUSG00000005718 | 4865 Tfap4         |
| ENSMUSG00000087641 | 4866 Gm12811       |
| ENSMUSG00000025531 | 4867 Chm           |
| ENSMUSG00000034602 | 4868 Mon2          |
| ENSMUSG00000025626 | 4869 Phf6          |
| ENSMUSG00000032965 | 4870 Ift57         |

|                    |                    |
|--------------------|--------------------|
| ENSMUSG00000033813 | 4871 Tcea1         |
| ENSMUSG00000035671 | 4872 Zswim4        |
| ENSMUSG00000042489 | 4873 Clspn         |
| ENSMUSG00000017861 | 4874 Mybl2         |
| ENSMUSG00000028907 | 4875 Utp11l        |
| ENSMUSG00000028414 | 4876 Fktn          |
| ENSMUSG00000050064 | 4877 Zfp697        |
| ENSMUSG00000062991 | 4878 Nrg1          |
| ENSMUSG00000029290 | 4879 Zfp326        |
| ENSMUSG00000061755 | 4880 Bod1l         |
| ENSMUSG00000028224 | 4881 Nbn           |
| ENSMUSG00000056228 | 4882 Cars2         |
| ENSMUSG00000054823 | 4883 Whsc11l       |
| ENSMUSG00000024273 | 4884 2700062C07Rik |
| ENSMUSG00000087379 | 4885 Gm13849       |
| ENSMUSG00000074743 | 4886 Thbd          |
| ENSMUSG00000029772 | 4887 Ahcyl2        |
| ENSMUSG00000035215 | 4888 Lsm7          |
| ENSMUSG00000022305 | 4889 Lrp12         |
| ENSMUSG00000036202 | 4890 Rif1          |
| ENSMUSG00000029434 | 4891 Vps33a        |
| ENSMUSG00000026628 | 4892 Atf3          |
| ENSMUSG00000026889 | 4893 Rbm18         |
| ENSMUSG00000081302 | 4894 Gm12020       |
| ENSMUSG00000006418 | 4895 Rnf114        |
| ENSMUSG00000019647 | 4896 Sema6a        |
| ENSMUSG00000032267 | 4897 Usp28         |
| ENSMUSG00000082675 | 4898 Gm6382        |
| ENSMUSG00000027194 | 4899 Ttc17         |
| ENSMUSG00000054277 | 4900 Arfgap3       |
| ENSMUSG00000030878 | 4901 Cdr2          |
| ENSMUSG00000055013 | 4902 Agap1         |
| ENSMUSG00000021185 | 4903 9030617O03Rik |
| ENSMUSG00000055322 | 4904 Tns1          |
| ENSMUSG00000039385 | 4905 Cdh6          |
| ENSMUSG00000030282 | 4906 Cmas          |
| ENSMUSG00000006818 | 4907 Sod2          |
| ENSMUSG00000056952 | 4908 Tatdn2        |
| ENSMUSG00000008435 | 4909 Rdh13         |
| ENSMUSG00000026349 | 4910 Ccnt2         |
| ENSMUSG00000086364 | 4911 Gm11751       |
| ENSMUSG00000031934 | 4912 Panx1         |

|                    |                    |
|--------------------|--------------------|
| ENSMUSG00000000555 | 4913 Itga5         |
| ENSMUSG00000038215 | 4914 Cep44         |
| ENSMUSG00000035472 | 4915 Slc25a21      |
| ENSMUSG00000032123 | 4916 Dpagt1        |
| ENSMUSG00000053581 | 4917 Zfand2a       |
| ENSMUSG00000031360 | 4918 Ctps2         |
| ENSMUSG00000023991 | 4919 Foxp4         |
| ENSMUSG00000050248 | 4920 Evc2          |
| ENSMUSG00000019960 | 4921 Dusp6         |
| ENSMUSG00000010476 | 4922 Ebf3          |
| ENSMUSG00000037152 | 4923 Ndufc1        |
| ENSMUSG00000020900 | 4924 Myh10         |
| ENSMUSG00000014547 | 4925 Wdfy2         |
| ENSMUSG00000011254 | 4926 Thg1l         |
| ENSMUSG00000020630 | 4927 Rnaseh1       |
| ENSMUSG00000030870 | 4928 Ubfd1         |
| ENSMUSG00000068036 | 4929 Mllt4         |
| ENSMUSG00000026608 | 4930 Kctd3         |
| ENSMUSG00000046753 | 4931 Ccdc66        |
| ENSMUSG00000029141 | 4932 Slc4a1ap      |
| ENSMUSG00000039578 | 4933 Ccser1        |
| ENSMUSG00000022023 | 4934 Wbp4          |
| ENSMUSG00000028420 | 4935 Tmem38b       |
| ENSMUSG00000031239 | 4936 Itm2a         |
| ENSMUSG00000071708 | 4937 Sms           |
| ENSMUSG00000026388 | 4938 3110009E18Rik |
| ENSMUSG00000055371 | 4939 Stam2         |
| ENSMUSG00000014504 | 4940 Srp19         |
| ENSMUSG00000036206 | 4941 Sh3bp4        |
| ENSMUSG00000017858 | 4942 Ift52         |
| ENSMUSG00000029776 | 4943 Hibadh        |
| ENSMUSG00000004319 | 4944 Clcn3         |
| ENSMUSG00000024666 | 4945 Tmem138       |
| ENSMUSG00000064215 | 4946 Ifi27         |
| ENSMUSG00000042558 | 4947 Adprhl2       |
| ENSMUSG00000030691 | 4948 Fchsd2        |
| ENSMUSG00000025958 | 4949 Creb1         |
| ENSMUSG00000105987 | 4950 AI506816      |
| ENSMUSG00000042613 | 4951 Pbxip1        |
| ENSMUSG00000102124 | 4952 Gm29296       |
| ENSMUSG00000023074 | 4953 Mospd1        |
| ENSMUSG00000020903 | 4954 Stx8          |

|                    |                    |
|--------------------|--------------------|
| ENSMUSG00000093479 | 4955 Gm20629       |
| ENSMUSG00000058446 | 4956 Znrf2         |
| ENSMUSG00000027655 | 4957 Dhx35         |
| ENSMUSG00000026466 | 4958 Tor1aip1      |
| ENSMUSG00000063628 | 4959 Gm7665        |
| ENSMUSG00000028483 | 4960 Snapc3        |
| ENSMUSG00000021635 | 4961 Rad17         |
| ENSMUSG00000025810 | 4962 Nrp1          |
| ENSMUSG00000042423 | 4963 Fbrs          |
| ENSMUSG00000085208 | 4964 Brip1os       |
| ENSMUSG00000030528 | 4965 Blm           |
| ENSMUSG00000024268 | 4966 Celf4         |
| ENSMUSG00000044150 | 4967 A830080D01Rik |
| ENSMUSG00000029125 | 4968 Stx18         |
| ENSMUSG00000082908 | 4969 Gm13736       |
| ENSMUSG00000097726 | 4970 9530036O11Rik |
| ENSMUSG00000079487 | 4971 Med12         |
| ENSMUSG00000038048 | 4972 Cntnap5c      |
| ENSMUSG00000062867 | 4973 Impdh2        |
| ENSMUSG00000021217 | 4974 Tshz3         |
| ENSMUSG00000026176 | 4975 Ctdsp1        |
| ENSMUSG00000022299 | 4976 Slc25a32      |
| ENSMUSG00000035455 | 4977 Figl1         |
| ENSMUSG00000041453 | 4978 Rpl21         |
| ENSMUSG00000031483 | 4979 Erlin2        |
| ENSMUSG00000038902 | 4980 Pogz          |
| ENSMUSG00000025894 | 4981 Aasdhppt      |
| ENSMUSG00000036478 | 4982 Btg1          |
| ENSMUSG00000035181 | 4983 Heatr5a       |
| ENSMUSG00000039335 | 4984 Spata16       |
| ENSMUSG00000000538 | 4985 Tom1l2        |
| ENSMUSG00000036435 | 4986 Exoc1         |
| ENSMUSG00000022515 | 4987 Anks3         |
| ENSMUSG00000029101 | 4988 Rgs12         |
| ENSMUSG00000042446 | 4989 Zmym4         |
| ENSMUSG00000069539 | 4990 Scyl2         |
| ENSMUSG00000058152 | 4991 Chsy3         |
| ENSMUSG00000018425 | 4992 Dhx40         |
| ENSMUSG00000021707 | 4993 Dhfr          |
| ENSMUSG00000096401 | 4994 Gm21811       |
| ENSMUSG00000039005 | 4995 Tlr4          |
| ENSMUSG00000021947 | 4996 Cryl1         |

|                     |                    |
|---------------------|--------------------|
| ENSMUSG00000052613  | 4997 Pcdh15        |
| ENSMUSG00000024068  | 4998 Spast         |
| ENSMUSG00000001248  | 4999 Gramd1a       |
| ENSMUSG00000038047  | 5000 Haus6         |
| ENSMUSG00000026201  | 5001 Stk16         |
| ENSMUSG00000056579  | 5002 Tug1          |
| ENSMUSG00000049295  | 5003 Zfp219        |
| ENSMUSG00000000605  | 5004 Clcn4         |
| ENSMUSG00000096403  | 5005 Gm9825        |
| ENSMUSG00000070469  | 5006 Adamtsl3      |
| ENSMUSG00000021339  | 5007 Mrs2          |
| ENSMUSG00000046718  | 5008 Bst2          |
| ENSMUSG00000020108  | 5009 Ddit4         |
| ENSMUSG00000060534  | 5010 Dcc           |
| ENSMUSG00000031221  | 5011 Igbp1         |
| ENSMUSG000000108749 | 5012 RP23-89C10.5  |
| ENSMUSG00000034617  | 5013 Mtrr          |
| ENSMUSG00000041491  | 5014 Cep78         |
| ENSMUSG00000020526  | 5015 Znhit3        |
| ENSMUSG00000040997  | 5016 Abhd4         |
| ENSMUSG00000035242  | 5017 Oaz1          |
| ENSMUSG00000033799  | 5018 Fam208b       |
| ENSMUSG00000063334  | 5019 Krr1          |
| ENSMUSG00000017002  | 5020 Slpi          |
| ENSMUSG00000041096  | 5021 Tspyl2        |
| ENSMUSG00000055538  | 5022 Zcchc24       |
| ENSMUSG00000043323  | 5023 Fbrsl1        |
| ENSMUSG00000085438  | 5024 1700020I14Rik |
| ENSMUSG00000033184  | 5025 Tmed7         |
| ENSMUSG00000050148  | 5026 Ubqln2        |
| ENSMUSG00000015357  | 5027 Clpx          |
| ENSMUSG00000019861  | 5028 Gopc          |
| ENSMUSG00000085793  | 5029 Lin52         |
| ENSMUSG00000034457  | 5030 Eda2r         |
| ENSMUSG00000026885  | 5031 Ttll11        |
| ENSMUSG00000032456  | 5032 Nmnat3        |
| ENSMUSG00000027323  | 5033 Rad51         |
| ENSMUSG00000027387  | 5034 Zc3h8         |
| ENSMUSG00000003518  | 5035 Dusp3         |
| ENSMUSG00000042380  | 5036 Smim12        |
| ENSMUSG00000032741  | 5037 Tpcn1         |
| ENSMUSG00000045482  | 5038 Trrap         |



|                    |                    |
|--------------------|--------------------|
| ENSMUSG00000031015 | 5039 Swap70        |
| ENSMUSG00000026755 | 5040 Arpc5l        |
| ENSMUSG00000029062 | 5041 Cdk11b        |
| ENSMUSG00000002147 | 5042 Stat6         |
| ENSMUSG00000005102 | 5043 Eif2ak4       |
| ENSMUSG00000064264 | 5044 Zfp428        |
| ENSMUSG00000031503 | 5045 Col4a2        |
| ENSMUSG00000021615 | 5046 Xrcc4         |
| ENSMUSG00000027465 | 5047 Tbc1d20       |
| ENSMUSG00000002799 | 5048 Jag2          |
| ENSMUSG00000022671 | 5049 Mzt2          |
| ENSMUSG00000057691 | 5050 Zfp746        |
| ENSMUSG00000083337 | 5051 Gm11539       |
| ENSMUSG00000038914 | 5052 Dido1         |
| ENSMUSG00000024074 | 5053 Crim1         |
| ENSMUSG00000041977 | 5054 Arhgef11      |
| ENSMUSG00000041870 | 5055 Ankrd13a      |
| ENSMUSG00000007812 | 5056 Zfp655        |
| ENSMUSG00000044496 | 5057 2510039O18Rik |
| ENSMUSG00000040462 | 5058 Os9           |
| ENSMUSG00000075394 | 5059 Hoxc4         |
| ENSMUSG00000028959 | 5060 Fastk         |
| ENSMUSG00000037646 | 5061 Vps13b        |
| ENSMUSG00000039046 | 5062 Usp6nl        |
| ENSMUSG00000025499 | 5063 Hras          |
| ENSMUSG00000042608 | 5064 Stk40         |
| ENSMUSG00000028995 | 5065 Fam126a       |
| ENSMUSG00000033955 | 5066 Tnks1bp1      |
| ENSMUSG00000020246 | 5067 Hcfc2         |
| ENSMUSG00000020564 | 5068 Atxn7l1       |
| ENSMUSG00000055760 | 5069 Gemin6        |
| ENSMUSG00000102069 | 5070 1700012I11Rik |
| ENSMUSG00000020409 | 5071 Slu7          |
| ENSMUSG00000020189 | 5072 Osbpl8        |
| ENSMUSG00000056153 | 5073 Socs6         |
| ENSMUSG00000060703 | 5074 Cd302         |
| ENSMUSG00000030538 | 5075 Cib1          |
| ENSMUSG00000031433 | 5076 Rbm41         |
| ENSMUSG00000025040 | 5077 Fundc1        |
| ENSMUSG00000010110 | 5078 Stx5a         |
| ENSMUSG00000048747 | 5079 E130114P18Rik |
| ENSMUSG00000027663 | 5080 Zmat3         |

|                    |                    |
|--------------------|--------------------|
| ENSMUSG00000031534 | 5081 Smim19        |
| ENSMUSG00000031021 | 5082 Tmem9b        |
| ENSMUSG00000033628 | 5083 Pik3c3        |
| ENSMUSG00000029992 | 5084 Gfpt1         |
| ENSMUSG00000034152 | 5085 Exoc3         |
| ENSMUSG00000056121 | 5086 Fez2          |
| ENSMUSG00000039130 | 5087 Zc3hc1        |
| ENSMUSG00000023908 | 5088 Pkmyt1        |
| ENSMUSG00000014303 | 5089 Glis2         |
| ENSMUSG00000005705 | 5090 Agrp          |
| ENSMUSG00000029415 | 5091 Sdad1         |
| ENSMUSG00000038844 | 5092 Kif16b        |
| ENSMUSG00000030768 | 5093 Disp1         |
| ENSMUSG00000030982 | 5094 9030624J02Rik |
| ENSMUSG00000017724 | 5095 Etv4          |
| ENSMUSG00000024766 | 5096 Lipo1         |
| ENSMUSG00000022420 | 5097 Dnal4         |
| ENSMUSG00000042831 | 5098 Alkbh6        |
| ENSMUSG00000029998 | 5099 Pcyox1        |
| ENSMUSG00000072082 | 5100 Ccnf          |
| ENSMUSG00000029198 | 5101 Grpel1        |
| ENSMUSG00000008575 | 5102 Nfib          |
| ENSMUSG00000041921 | 5103 Metap1d       |
| ENSMUSG00000029916 | 5104 Agk           |
| ENSMUSG00000039671 | 5105 Zmynd8        |
| ENSMUSG00000041135 | 5106 Ripk2         |
| ENSMUSG00000010663 | 5107 Fads1         |
| ENSMUSG00000006058 | 5108 Snf8          |
| ENSMUSG00000072940 | 5109 Gm10443       |
| ENSMUSG00000058761 | 5110 Rnf169        |
| ENSMUSG00000055835 | 5111 Zfp1          |
| ENSMUSG00000050965 | 5112 Prkca         |
| ENSMUSG00000032870 | 5113 Smap2         |
| ENSMUSG00000031880 | 5114 Rrad          |
| ENSMUSG00000094638 | 5115 Gm21972       |
| ENSMUSG00000037296 | 5116 Lsm1          |
| ENSMUSG00000027305 | 5117 Ndufaf1       |
| ENSMUSG00000026771 | 5118 Spopl         |
| ENSMUSG00000049882 | 5119 Vcpkmt        |
| ENSMUSG00000036672 | 5120 Cenpt         |
| ENSMUSG00000039221 | 5121 Rpl22l1       |
| ENSMUSG00000087259 | 5122 2610035D17Rik |

|                    |                    |
|--------------------|--------------------|
| ENSMUSG00000057614 | 5123 Gnai1         |
| ENSMUSG00000039463 | 5124 Slc9a8        |
| ENSMUSG00000038406 | 5125 Scaf1         |
| ENSMUSG00000032384 | 5126 Csnk1g1       |
| ENSMUSG00000034343 | 5127 Ube2f         |
| ENSMUSG00000029599 | 5128 Ddx54         |
| ENSMUSG00000031838 | 5129 Ifi30         |
| ENSMUSG00000010025 | 5130 Aldh3a2       |
| ENSMUSG00000005124 | 5131 Wisp1         |
| ENSMUSG00000032712 | 5132 2810474O19Rik |
| ENSMUSG00000029094 | 5133 Afap1         |
| ENSMUSG00000033075 | 5134 Senp1         |
| ENSMUSG00000040713 | 5135 Creg1         |
| ENSMUSG00000048661 | 5136 Lemd3         |
| ENSMUSG00000022898 | 5137 Dscr3         |
| ENSMUSG00000007080 | 5138 Pole          |
| ENSMUSG00000031153 | 5139 Gripap1       |
| ENSMUSG00000025278 | 5140 Flnb          |
| ENSMUSG00000028608 | 5141 0610037L13Rik |
| ENSMUSG00000021038 | 5142 Vipas39       |
| ENSMUSG00000033767 | 5143 D930015E06Rik |
| ENSMUSG00000033943 | 5144 Mga           |
| ENSMUSG00000048279 | 5145 Sacs          |
| ENSMUSG00000038594 | 5146 Cep85l        |
| ENSMUSG00000030802 | 5147 Bckdk         |
| ENSMUSG00000078622 | 5148 Ccdc47        |
| ENSMUSG00000020590 | 5149 Snx13         |
| ENSMUSG00000042323 | 5150 Pbrm1         |
| ENSMUSG00000000600 | 5151 Krit1         |
| ENSMUSG00000022519 | 5152 Srl           |
| ENSMUSG00000038525 | 5153 Armc10        |
| ENSMUSG00000029438 | 5154 Bcl7a         |
| ENSMUSG00000030257 | 5155 Srgap3        |
| ENSMUSG00000021375 | 5156 Kif13a        |
| ENSMUSG00000039656 | 5157 Rxrb          |
| ENSMUSG00000038070 | 5158 Cntlh         |
| ENSMUSG00000015568 | 5159 Lpl           |
| ENSMUSG00000042492 | 5160 Tbc1d10b      |
| ENSMUSG00000078784 | 5161 1810022K09Rik |
| ENSMUSG00000022947 | 5162 Cbr3          |
| ENSMUSG00000029056 | 5163 Pank4         |
| ENSMUSG00000035107 | 5164 Dcbld2        |

|                     |                    |
|---------------------|--------------------|
| ENSMUSG00000046096  | 5165 BC030336      |
| ENSMUSG00000020634  | 5166 Ubxn2a        |
| ENSMUSG00000025280  | 5167 Polr3a        |
| ENSMUSG00000055024  | 5168 Ep300         |
| ENSMUSG00000029461  | 5169 Fam168a       |
| ENSMUSG00000031622  | 5170 Sin3b         |
| ENSMUSG00000038506  | 5171 Dcun1d2       |
| ENSMUSG00000064356  | 5172 mt-Atp8       |
| ENSMUSG00000092607  | 5173 Scnm1         |
| ENSMUSG00000036676  | 5174 Tmtc3         |
| ENSMUSG00000017288  | 5175 Vps53         |
| ENSMUSG00000037697  | 5176 Ddhd1         |
| ENSMUSG00000031682  | 5177 1700011L22Rik |
| ENSMUSG00000012117  | 5178 Dhdds         |
| ENSMUSG00000025609  | 5179 Mklm1         |
| ENSMUSG000000103181 | 5180 A330069K06Rik |
| ENSMUSG00000000811  | 5181 Txnrd3        |
| ENSMUSG00000020107  | 5182 Anapc16       |
| ENSMUSG000000057278 | 5183 Snrpg         |
| ENSMUSG00000035232  | 5184 Pdk3          |
| ENSMUSG00000025006  | 5185 Sorbs1        |
| ENSMUSG00000038116  | 5186 Phf20         |
| ENSMUSG00000084093  | 5187 Gm16418       |
| ENSMUSG00000007617  | 5188 Homer1        |
| ENSMUSG00000018362  | 5189 Kpna2         |
| ENSMUSG00000029464  | 5190 Gpn3          |
| ENSMUSG00000026469  | 5191 Xpr1          |
| ENSMUSG00000036580  | 5192 Spg20         |
| ENSMUSG00000032353  | 5193 Tmed3         |
| ENSMUSG00000032724  | 5194 Abtb2         |
| ENSMUSG00000097035  | 5195 Gm26692       |
| ENSMUSG00000033596  | 5196 Rfwd3         |
| ENSMUSG00000021497  | 5197 Txndc15       |
| ENSMUSG00000052040  | 5198 Klf13         |
| ENSMUSG00000061374  | 5199 Fiz1          |
| ENSMUSG00000032342  | 5200 Mto1          |
| ENSMUSG00000005078  | 5201 Jkamp         |
| ENSMUSG00000027560  | 5202 Dok5          |
| ENSMUSG00000027667  | 5203 Zfp639        |
| ENSMUSG00000038740  | 5204 Mvb12b        |
| ENSMUSG00000028252  | 5205 Ccnc          |
| ENSMUSG00000025551  | 5206 Fgf14         |

|                    |               |
|--------------------|---------------|
| ENSMUSG00000048922 | 5207 Cdca2    |
| ENSMUSG00000003779 | 5208 Kif20a   |
| ENSMUSG00000037852 | 5209 Cpe      |
| ENSMUSG00000024122 | 5210 Pdpk1    |
| ENSMUSG00000026974 | 5211 Zmynd19  |
| ENSMUSG00000083844 | 5212 Ube2d-ps |
| ENSMUSG00000040843 | 5213 Tipr1    |
| ENSMUSG00000093387 | 5214 Gm20732  |
| ENSMUSG00000021687 | 5215 Scamp1   |
| ENSMUSG00000054455 | 5216 Vapb     |
| ENSMUSG00000030498 | 5217 Gas2     |
| ENSMUSG00000079225 | 5218 Gm9531   |
| ENSMUSG00000033589 | 5219 Reep4    |
| ENSMUSG00000029535 | 5220 Triap1   |
| ENSMUSG00000048756 | 5221 Foxo3    |
| ENSMUSG00000034243 | 5222 Golgb1   |
| ENSMUSG00000020561 | 5223 Twistnb  |
| ENSMUSG00000053929 | 5224 Cyhr1    |
| ENSMUSG00000061313 | 5225 Ddhd2    |
| ENSMUSG00000021175 | 5226 Cdca7l   |
| ENSMUSG00000030432 | 5227 Rpl28    |
| ENSMUSG00000032411 | 5228 Tfdp2    |
| ENSMUSG00000040857 | 5229 Erf      |
| ENSMUSG00000024298 | 5230 Zfp871   |
| ENSMUSG00000028565 | 5231 Nfia     |
| ENSMUSG00000054321 | 5232 Taf4b    |
| ENSMUSG00000019528 | 5233 Gyg      |
| ENSMUSG00000015846 | 5234 Rxra     |
| ENSMUSG00000050410 | 5235 Tcf19    |
| ENSMUSG00000073725 | 5236 Lmbrd1   |
| ENSMUSG00000040464 | 5237 Gtpbp10  |
| ENSMUSG00000030518 | 5238 Fam189a1 |
| ENSMUSG00000071652 | 5239 Ints5    |
| ENSMUSG00000034518 | 5240 Hmgxb4   |
| ENSMUSG00000019461 | 5241 Plscr3   |
| ENSMUSG00000041720 | 5242 Pi4ka    |
| ENSMUSG00000057058 | 5243 Skap1    |
| ENSMUSG00000021495 | 5244 Fam193b  |
| ENSMUSG00000030556 | 5245 Lrrc28   |
| ENSMUSG00000022009 | 5246 Nufip1   |
| ENSMUSG00000027519 | 5247 Rab22a   |
| ENSMUSG00000015501 | 5248 Hivep2   |

|                     |                    |
|---------------------|--------------------|
| ENSMUSG00000021983  | 5249 Atp8a2        |
| ENSMUSG00000009076  | 5250 Zmat5         |
| ENSMUSG00000027366  | 5251 Sppl2a        |
| ENSMUSG000000056158 | 5252 Car10         |
| ENSMUSG00000078377  | 5253 Gm4294        |
| ENSMUSG00000002068  | 5254 Ccne1         |
| ENSMUSG000000025155 | 5255 Dus1l         |
| ENSMUSG000000056749 | 5256 Nfil3         |
| ENSMUSG000000021221 | 5257 Dpf3          |
| ENSMUSG000000040648 | 5258 Ppip5k2       |
| ENSMUSG000000086474 | 5259 9130204K15Rik |
| ENSMUSG000000033285 | 5260 Wdr3          |
| ENSMUSG000000020610 | 5261 Amz2          |
| ENSMUSG000000022125 | 5262 Cln5          |
| ENSMUSG000000018858 | 5263 Ict1          |
| ENSMUSG000000074364 | 5264 Ehd2          |
| ENSMUSG000000036943 | 5265 Rab8b         |
| ENSMUSG000000029313 | 5266 Aff1          |
| ENSMUSG000000028894 | 5267 Inpp5b        |
| ENSMUSG000000042331 | 5268 Specc1        |
| ENSMUSG000000047940 | 5269 Stpg2         |
| ENSMUSG000000040661 | 5270 Rad54l2       |
| ENSMUSG000000035048 | 5271 Anapc13       |
| ENSMUSG000000099938 | 5272 C030007H22Rik |
| ENSMUSG000000051855 | 5273 Mest          |
| ENSMUSG000000024924 | 5274 Vldlr         |
| ENSMUSG000000037788 | 5275 Vopp1         |
| ENSMUSG000000022426 | 5276 Josd1         |
| ENSMUSG000000020038 | 5277 Cry1          |
| ENSMUSG000000102550 | 5278 Gm8276        |
| ENSMUSG000000002731 | 5279 Prkra         |
| ENSMUSG000000027868 | 5280 Tbx15         |
| ENSMUSG000000059482 | 5281 2610301B20Rik |
| ENSMUSG000000031691 | 5282 Tnp02         |
| ENSMUSG000000033970 | 5283 Rfc3          |
| ENSMUSG000000026883 | 5284 Dab2ip        |
| ENSMUSG000000041319 | 5285 Thoc6         |
| ENSMUSG000000020528 | 5286 Prpsap2       |
| ENSMUSG000000022324 | 5287 Matn2         |
| ENSMUSG000000067722 | 5288 BC003965      |
| ENSMUSG000000043183 | 5289 Simc1         |
| ENSMUSG000000044033 | 5290 Ccdc141       |

|                    |                    |
|--------------------|--------------------|
| ENSMUSG00000028089 | 5291 Chd1l         |
| ENSMUSG00000034361 | 5292 Cpne2         |
| ENSMUSG00000024824 | 5293 Rad9a         |
| ENSMUSG00000024054 | 5294 Smchd1        |
| ENSMUSG00000100955 | 5295 Gm18728       |
| ENSMUSG00000026313 | 5296 Hdac4         |
| ENSMUSG00000100131 | 5297 Gm28439       |
| ENSMUSG00000020722 | 5298 Cacng1        |
| ENSMUSG00000020003 | 5299 Pex7          |
| ENSMUSG00000031429 | 5300 Psm10         |
| ENSMUSG00000034951 | 5301 Cog7          |
| ENSMUSG00000030598 | 5302 Fbxo17        |
| ENSMUSG00000031485 | 5303 Prosc         |
| ENSMUSG00000079418 | 5304 Atg4a         |
| ENSMUSG00000025925 | 5305 Terf1         |
| ENSMUSG00000029179 | 5306 Zcchc4        |
| ENSMUSG00000040043 | 5307 Rbms2         |
| ENSMUSG00000017132 | 5308 Cyth1         |
| ENSMUSG00000098682 | 5309 Otx2os1       |
| ENSMUSG00000040250 | 5310 Asun          |
| ENSMUSG00000015747 | 5311 Vps45         |
| ENSMUSG00000052299 | 5312 Ltn1          |
| ENSMUSG00000000278 | 5313 Scpep1        |
| ENSMUSG00000021385 | 5314 Ippk          |
| ENSMUSG00000000631 | 5315 Myo18a        |
| ENSMUSG00000053580 | 5316 Tanc2         |
| ENSMUSG00000041231 | 5317 Ublcp1        |
| ENSMUSG00000020777 | 5318 Acox1         |
| ENSMUSG00000049950 | 5319 Rpp38         |
| ENSMUSG00000038685 | 5320 Rtel1         |
| ENSMUSG00000035596 | 5321 Mboat7        |
| ENSMUSG00000020962 | 5322 Gtf2a1        |
| ENSMUSG00000073184 | 5323 Gm10479       |
| ENSMUSG00000081715 | 5324 Rps11-ps3     |
| ENSMUSG00000021277 | 5325 Traf3         |
| ENSMUSG00000034789 | 5326 Rab24         |
| ENSMUSG00000043154 | 5327 Ppp2r3a       |
| ENSMUSG00000063142 | 5328 Kcnma1        |
| ENSMUSG00000032376 | 5329 Usp3          |
| ENSMUSG00000032113 | 5330 Chek1         |
| ENSMUSG00000085154 | 5331 C130046K22Rik |
| ENSMUSG00000070002 | 5332 Eil           |

|                    |               |
|--------------------|---------------|
| ENSMUSG00000036327 | 5333 Qsox2    |
| ENSMUSG00000024384 | 5334 Iws1     |
| ENSMUSG00000004032 | 5335 Gstm5    |
| ENSMUSG00000029594 | 5336 Rbm19    |
| ENSMUSG00000028848 | 5337 Gpn2     |
| ENSMUSG00000033863 | 5338 Klf9     |
| ENSMUSG00000028917 | 5339 Plekhm2  |
| ENSMUSG00000023952 | 5340 Gtpbp2   |
| ENSMUSG00000037151 | 5341 Lrrc20   |
| ENSMUSG00000026280 | 5342 Atg4b    |
| ENSMUSG00000039220 | 5343 Ppp1r10  |
| ENSMUSG00000046230 | 5344 Vps13a   |
| ENSMUSG00000033701 | 5345 Acbd6    |
| ENSMUSG00000043004 | 5346 Gng2     |
| ENSMUSG00000021373 | 5347 Cap2     |
| ENSMUSG00000025860 | 5348 Xiap     |
| ENSMUSG00000020142 | 5349 Slc1a4   |
| ENSMUSG00000032452 | 5350 Clstn2   |
| ENSMUSG00000025486 | 5351 Sirt3    |
| ENSMUSG00000021536 | 5352 Adcy2    |
| ENSMUSG00000029569 | 5353 Tmem168  |
| ENSMUSG00000007589 | 5354 Tinf2    |
| ENSMUSG00000023572 | 5355 Ccndbp1  |
| ENSMUSG00000028684 | 5356 Urod     |
| ENSMUSG00000001517 | 5357 Foxm1    |
| ENSMUSG00000005899 | 5358 Smpd4    |
| ENSMUSG00000049521 | 5359 Cdc42ep1 |
| ENSMUSG00000037492 | 5360 Zmat4    |
| ENSMUSG00000016757 | 5361 Ttll12   |
| ENSMUSG00000032306 | 5362 Mpi      |
| ENSMUSG00000024072 | 5363 Yipf4    |
| ENSMUSG00000008822 | 5364 Acyp1    |
| ENSMUSG00000039050 | 5365 Osbp12   |
| ENSMUSG00000026141 | 5366 Col19a1  |
| ENSMUSG00000023915 | 5367 Tnfrsf21 |
| ENSMUSG00000002732 | 5368 Fkbp7    |
| ENSMUSG00000036825 | 5369 Ssx2ip   |
| ENSMUSG00000026516 | 5370 Nvl      |
| ENSMUSG00000044155 | 5371 Lsm8     |
| ENSMUSG00000033845 | 5372 Mrpl15   |
| ENSMUSG00000029613 | 5373 Eif2ak1  |
| ENSMUSG00000055421 | 5374 Pcdh9    |



|                    |                    |
|--------------------|--------------------|
| ENSMUSG00000031297 | 5375 Slc7a3        |
| ENSMUSG00000063760 | 5376 Rnf217        |
| ENSMUSG00000051285 | 5377 Pcmttd1       |
| ENSMUSG00000032459 | 5378 Mrps22        |
| ENSMUSG00000032475 | 5379 Nck1          |
| ENSMUSG00000102886 | 5380 Gm30667       |
| ENSMUSG00000095687 | 5381 Rnaset2a      |
| ENSMUSG00000005501 | 5382 Usp40         |
| ENSMUSG00000060032 | 5383 H2afj         |
| ENSMUSG00000006705 | 5384 Pknox1        |
| ENSMUSG00000055409 | 5385 Nell1         |
| ENSMUSG00000064080 | 5386 Fbln2         |
| ENSMUSG00000022160 | 5387 Mettl3        |
| ENSMUSG00000105085 | 5388 Gm42567       |
| ENSMUSG00000035401 | 5389 2210018M11Rik |
| ENSMUSG00000078348 | 5390 Sf3b5         |
| ENSMUSG00000040782 | 5391 Rfwd2         |
| ENSMUSG00000018923 | 5392 Med11         |
| ENSMUSG00000028643 | 5393 Ccdc23        |
| ENSMUSG00000086804 | 5394 Gm43154       |
| ENSMUSG00000021460 | 5395 Auh           |
| ENSMUSG00000021965 | 5396 Ska3          |
| ENSMUSG00000027559 | 5397 Car3          |
| ENSMUSG00000030180 | 5398 Kdm5a         |
| ENSMUSG00000019303 | 5399 Psmc3ip       |
| ENSMUSG00000049421 | 5400 Zfp260        |
| ENSMUSG00000020902 | 5401 Ntn1          |
| ENSMUSG00000024218 | 5402 Taf11         |
| ENSMUSG00000061650 | 5403 Med9          |
| ENSMUSG00000013089 | 5404 Etv5          |
| ENSMUSG00000036769 | 5405 Wdr44         |
| ENSMUSG00000029028 | 5406 Lrrc47        |
| ENSMUSG00000022474 | 5407 Pmm1          |
| ENSMUSG00000027163 | 5408 Commd9        |
| ENSMUSG00000001767 | 5409 Crnk1l        |
| ENSMUSG00000032207 | 5410 Lipc          |
| ENSMUSG00000041488 | 5411 Stx3          |
| ENSMUSG00000024317 | 5412 Rnf138        |
| ENSMUSG00000030990 | 5413 Pgap2         |
| ENSMUSG00000052917 | 5414 Senp7         |
| ENSMUSG00000051451 | 5415 Crebzf        |
| ENSMUSG00000078591 | 5416 Hs3st4        |

|                    |                    |
|--------------------|--------------------|
| ENSMUSG00000034042 | 5417 Gbbp11        |
| ENSMUSG00000046671 | 5418 Mtfr1l        |
| ENSMUSG00000004791 | 5419 Pgf           |
| ENSMUSG00000028527 | 5420 Ak4           |
| ENSMUSG00000032244 | 5421 Fem1b         |
| ENSMUSG00000025102 | 5422 3110040N11Rik |
| ENSMUSG00000034867 | 5423 Ankrd27       |
| ENSMUSG00000022568 | 5424 Scrib         |
| ENSMUSG00000046836 | 5425 Brox          |
| ENSMUSG00000026319 | 5426 2310035C23Rik |
| ENSMUSG00000031012 | 5427 Cask          |
| ENSMUSG00000007036 | 5428 Abhd16a       |
| ENSMUSG00000030287 | 5429 Itpr2         |
| ENSMUSG00000096914 | 5430 Galntl6       |
| ENSMUSG00000036356 | 5431 Csgalnact1    |
| ENSMUSG00000065663 | 5432 Gm22579       |
| ENSMUSG00000029458 | 5433 Brap          |
| ENSMUSG00000037070 | 5434 Rbmxl1        |
| ENSMUSG00000075486 | 5435 Commd6        |
| ENSMUSG00000051065 | 5436 Mb21d2        |
| ENSMUSG00000021190 | 5437 Lgmn          |
| ENSMUSG00000079700 | 5438 Fpr3          |
| ENSMUSG00000021482 | 5439 Aaed1         |
| ENSMUSG00000059005 | 5440 Hnrnpa3       |
| ENSMUSG00000031652 | 5441 N4bp1         |
| ENSMUSG00000062554 | 5442 Gm12751       |
| ENSMUSG00000015247 | 5443 Nipsnap3b     |
| ENSMUSG00000031913 | 5444 Vps4a         |
| ENSMUSG00000061751 | 5445 Kalrn         |
| ENSMUSG00000015882 | 5446 Lcorl         |
| ENSMUSG00000005686 | 5447 Ampd3         |
| ENSMUSG00000034190 | 5448 Chmp7         |
| ENSMUSG00000027884 | 5449 Clcc1         |
| ENSMUSG00000033128 | 5450 Gga1          |
| ENSMUSG00000053333 | 5451 Dis3l2        |
| ENSMUSG00000070639 | 5452 Lrrc8b        |
| ENSMUSG00000022684 | 5453 Bfar          |
| ENSMUSG00000010392 | 5454 Gosr1         |
| ENSMUSG00000030796 | 5455 Tead2         |
| ENSMUSG00000003923 | 5456 Tfam          |
| ENSMUSG00000025591 | 5457 Tma16         |
| ENSMUSG00000050213 | 5458 Snip1         |

|                    |                    |
|--------------------|--------------------|
| ENSMUSG00000040363 | 5459 Bcor          |
| ENSMUSG00000048175 | 5460 Asb8          |
| ENSMUSG00000035206 | 5461 Sppl2b        |
| ENSMUSG00000049401 | 5462 Ogfr          |
| ENSMUSG00000038271 | 5463 Iffo1         |
| ENSMUSG00000062054 | 5464 Iah1          |
| ENSMUSG00000059173 | 5465 Pde1a         |
| ENSMUSG00000020955 | 5466 Ap4s1         |
| ENSMUSG00000022178 | 5467 Ajuba         |
| ENSMUSG00000035778 | 5468 Ggta1         |
| ENSMUSG00000089917 | 5469 Uckl1         |
| ENSMUSG00000032491 | 5470 Nradd         |
| ENSMUSG00000097031 | 5471 Gm26820       |
| ENSMUSG00000022120 | 5472 Rnf219        |
| ENSMUSG00000021240 | 5473 Abcd4         |
| ENSMUSG00000017210 | 5474 Med24         |
| ENSMUSG00000062257 | 5475 Opcml         |
| ENSMUSG00000052062 | 5476 Pard3b        |
| ENSMUSG00000061436 | 5477 Hipk2         |
| ENSMUSG00000028672 | 5478 Hmgcl         |
| ENSMUSG00000002345 | 5479 Borcs8        |
| ENSMUSG00000025857 | 5480 Dnaaf5        |
| ENSMUSG00000006423 | 5481 C330007P06Rik |
| ENSMUSG00000030660 | 5482 Pik3c2a       |
| ENSMUSG00000052852 | 5483 Reep1         |
| ENSMUSG00000003134 | 5484 Tbc1d8        |
| ENSMUSG00000046179 | 5485 E2f8          |
| ENSMUSG00000044030 | 5486 Irf2bp1       |
| ENSMUSG00000029387 | 5487 Gtf2h3        |
| ENSMUSG00000032044 | 5488 Rpusd4        |
| ENSMUSG00000001983 | 5489 Taco1         |
| ENSMUSG00000030451 | 5490 Herc2         |
| ENSMUSG00000027634 | 5491 Ndr3          |
| ENSMUSG00000015488 | 5492 Cacfd1        |
| ENSMUSG00000025907 | 5493 Rb1cc1        |
| ENSMUSG00000097252 | 5494 Gm6634        |
| ENSMUSG00000024542 | 5495 Cep192        |
| ENSMUSG00000030924 | 5496 2610020H08Rik |
| ENSMUSG00000042496 | 5497 Prdm10        |
| ENSMUSG00000061082 | 5498 Plac1         |
| ENSMUSG00000024143 | 5499 Rhoq          |
| ENSMUSG00000039345 | 5500 Mettl22       |

|                    |                    |
|--------------------|--------------------|
| ENSMUSG00000021177 | 5501 Tdp1          |
| ENSMUSG00000085721 | 5502 Gm12796       |
| ENSMUSG00000002342 | 5503 Tmem161a      |
| ENSMUSG00000024442 | 5504 0610009O20Rik |
| ENSMUSG00000058979 | 5505 Cecr5         |
| ENSMUSG00000053898 | 5506 Ech1          |
| ENSMUSG00000041949 | 5507 Tango6        |
| ENSMUSG00000015217 | 5508 Hmgb3         |
| ENSMUSG00000029135 | 5509 Fosl2         |
| ENSMUSG00000064293 | 5510 Cntn4         |
| ENSMUSG00000074358 | 5511 Ccdc61        |
| ENSMUSG00000058690 | 5512 Ccser2        |
| ENSMUSG00000048832 | 5513 Vps37c        |
| ENSMUSG00000027551 | 5514 Zfp64         |
| ENSMUSG00000037257 | 5515 Aagab         |
| ENSMUSG00000024712 | 5516 Rfk           |
| ENSMUSG00000026510 | 5517 Trp53bp2      |
| ENSMUSG00000029501 | 5518 Ankle2        |
| ENSMUSG00000067818 | 5519 Myl9          |
| ENSMUSG00000036270 | 5520 Edc4          |
| ENSMUSG00000007039 | 5521 Ddah2         |
| ENSMUSG00000021646 | 5522 Mccc2         |
| ENSMUSG00000035614 | 5523 Fam179b       |
| ENSMUSG00000022967 | 5524 Ifnar1        |
| ENSMUSG00000069631 | 5525 Strada        |
| ENSMUSG00000024978 | 5526 Gpam          |
| ENSMUSG00000028496 | 5527 Mllt3         |
| ENSMUSG00000031367 | 5528 Ap1s2         |
| ENSMUSG00000079685 | 5529 Ulbp1         |
| ENSMUSG00000086688 | 5530 Gm11560       |
| ENSMUSG00000032413 | 5531 Rasa2         |
| ENSMUSG00000027575 | 5532 Arfgap1       |
| ENSMUSG00000036934 | 5533 4921524J17Rik |
| ENSMUSG00000052712 | 5534 BC004004      |
| ENSMUSG00000038034 | 5535 Igsf8         |
| ENSMUSG00000032633 | 5536 Flcn          |
| ENSMUSG00000049387 | 5537 Cox7b2        |
| ENSMUSG00000024276 | 5538 Zfp397        |
| ENSMUSG00000031748 | 5539 Gnao1         |
| ENSMUSG00000000916 | 5540 Nsun5         |
| ENSMUSG00000027787 | 5541 Nmd3          |
| ENSMUSG00000026072 | 5542 Il1r1         |

|                     |                    |
|---------------------|--------------------|
| ENSMUSG00000004665  | 5543 Cnn2          |
| ENSMUSG000000062098 | 5544 Btbd3         |
| ENSMUSG000000029145 | 5545 Eif2b4        |
| ENSMUSG000000045038 | 5546 Prkce         |
| ENSMUSG000000027573 | 5547 Gid8          |
| ENSMUSG000000078970 | 5548 Wdr92         |
| ENSMUSG000000030431 | 5549 Tmem238       |
| ENSMUSG00000002222  | 5550 Rmnd5a        |
| ENSMUSG000000027984 | 5551 Hadh          |
| ENSMUSG000000027374 | 5552 Mrps5         |
| ENSMUSG000000030452 | 5553 Nipa2         |
| ENSMUSG000000025402 | 5554 Nab2          |
| ENSMUSG000000057101 | 5555 Zfp180        |
| ENSMUSG000000038417 | 5556 Fig4          |
| ENSMUSG000000060538 | 5557 Tmem219       |
| ENSMUSG000000029414 | 5558 Kntc1         |
| ENSMUSG000000023055 | 5559 Calcoco1      |
| ENSMUSG000000079588 | 5560 Tmem182       |
| ENSMUSG000000022792 | 5561 Yars2         |
| ENSMUSG000000052942 | 5562 Glis3         |
| ENSMUSG000000042549 | 5563 Map2k3os      |
| ENSMUSG000000034278 | 5564 Dnajc17       |
| ENSMUSG000000060098 | 5565 Prmt7         |
| ENSMUSG000000028982 | 5566 Slc25a33      |
| ENSMUSG000000024944 | 5567 Arl2          |
| ENSMUSG000000060301 | 5568 2610008E11Rik |
| ENSMUSG000000040652 | 5569 Oaz2          |
| ENSMUSG000000038102 | 5570 Trappc11      |
| ENSMUSG000000078578 | 5571 Ube2d3        |
| ENSMUSG000000026781 | 5572 Acbd5         |
| ENSMUSG000000025172 | 5573 Ankrd2        |
| ENSMUSG000000044700 | 5574 Tmem201       |
| ENSMUSG000000040054 | 5575 Baz2a         |
| ENSMUSG000000029199 | 5576 Lias          |
| ENSMUSG000000026005 | 5577 Rpe           |
| ENSMUSG000000025231 | 5578 Sufu          |
| ENSMUSG000000024975 | 5579 Pdc4          |
| ENSMUSG000000038227 | 5580 Hoxa9         |
| ENSMUSG000000048807 | 5581 Slc35e4       |
| ENSMUSG000000047648 | 5582 Fbxo30        |
| ENSMUSG000000014873 | 5583 Surf2         |
| ENSMUSG000000031295 | 5584 Phka2         |

|                    |                |
|--------------------|----------------|
| ENSMUSG00000024790 | 5585 Sac3d1    |
| ENSMUSG00000081700 | 5586 Atp5k-ps2 |
| ENSMUSG00000018537 | 5587 Pcgf2     |
| ENSMUSG00000058594 | 5588 Fbxo18    |
| ENSMUSG00000027080 | 5589 Med19     |
| ENSMUSG00000063531 | 5590 Sema3e    |
| ENSMUSG00000032440 | 5591 Tgfbr2    |
| ENSMUSG00000049184 | 5592 Purg      |
| ENSMUSG00000019302 | 5593 Atp6v0a1  |
| ENSMUSG00000034403 | 5594 Pja1      |
| ENSMUSG00000022351 | 5595 Sqle      |
| ENSMUSG00000063052 | 5596 Lrrc40    |
| ENSMUSG00000047534 | 5597 Mis18bp1  |
| ENSMUSG00000037353 | 5598 Letmd1    |
| ENSMUSG00000020439 | 5599 Smtn      |
| ENSMUSG00000025178 | 5600 Pi4k2a    |
| ENSMUSG00000030522 | 5601 Mtmr10    |
| ENSMUSG00000024446 | 5602 Rpp21     |
| ENSMUSG00000039210 | 5603 Gpatch2   |
| ENSMUSG00000060733 | 5604 Ipmk      |
| ENSMUSG00000038936 | 5605 Sccpdh    |
| ENSMUSG00000045658 | 5606 Pid1      |
| ENSMUSG00000018648 | 5607 Dusp14    |
| ENSMUSG00000070565 | 5608 Rasal2    |
| ENSMUSG00000031352 | 5609 Hccs      |
| ENSMUSG00000049807 | 5610 Arhgap23  |
| ENSMUSG00000081113 | 5611 Gm7308    |
| ENSMUSG00000060935 | 5612 Tmem263   |
| ENSMUSG00000026672 | 5613 Optn      |
| ENSMUSG00000022771 | 5614 Ppil2     |
| ENSMUSG00000020532 | 5615 Acaca     |
| ENSMUSG00000027669 | 5616 Gnb4      |
| ENSMUSG00000056220 | 5617 Pla2g4a   |
| ENSMUSG00000042447 | 5618 Mios      |
| ENSMUSG00000014633 | 5619 Cmc2      |
| ENSMUSG00000036256 | 5620 Igfbp7    |
| ENSMUSG00000033411 | 5621 Ctdspl2   |
| ENSMUSG00000030788 | 5622 Rnf141    |
| ENSMUSG00000039994 | 5623 Timeless  |
| ENSMUSG00000040640 | 5624 Erc2      |
| ENSMUSG00000020538 | 5625 Srebf1    |
| ENSMUSG00000040415 | 5626 Dtx3      |

|                    |                    |
|--------------------|--------------------|
| ENSMUSG00000031683 | 5627 Lsm6          |
| ENSMUSG00000030844 | 5628 Rgs10         |
| ENSMUSG00000078515 | 5629 Ddi2          |
| ENSMUSG00000005823 | 5630 Gpr108        |
| ENSMUSG00000025161 | 5631 Slc16a3       |
| ENSMUSG00000026879 | 5632 Gsn           |
| ENSMUSG00000098024 | 5633 Gm27003       |
| ENSMUSG00000015095 | 5634 Fbxw5         |
| ENSMUSG00000037287 | 5635 Tbc1          |
| ENSMUSG00000006494 | 5636 Pdk1          |
| ENSMUSG00000029726 | 5637 Mepce         |
| ENSMUSG00000026669 | 5638 Mcm10         |
| ENSMUSG00000049339 | 5639 Fam134a       |
| ENSMUSG00000025269 | 5640 Apex2         |
| ENSMUSG00000041308 | 5641 Sntb2         |
| ENSMUSG00000001054 | 5642 Rmnd5b        |
| ENSMUSG00000058881 | 5643 Zfp516        |
| ENSMUSG00000013155 | 5644 Enkd1         |
| ENSMUSG00000022822 | 5645 Abcc5         |
| ENSMUSG00000040760 | 5646 Appl1         |
| ENSMUSG00000000567 | 5647 Sox9          |
| ENSMUSG00000040097 | 5648 Flywch1       |
| ENSMUSG00000020898 | 5649 Ctc1          |
| ENSMUSG00000038776 | 5650 Ephx1         |
| ENSMUSG00000047284 | 5651 Neurl4        |
| ENSMUSG00000014503 | 5652 Pkd2l2        |
| ENSMUSG00000102046 | 5653 2810404M03Rik |
| ENSMUSG00000032564 | 5654 Cpne4         |
| ENSMUSG00000036632 | 5655 Alg5          |
| ENSMUSG00000059187 | 5656 Fam19a1       |
| ENSMUSG00000100580 | 5657 4933436I20Rik |
| ENSMUSG00000070372 | 5658 Capza1        |
| ENSMUSG00000059866 | 5659 Tnip2         |
| ENSMUSG00000032443 | 5660 Zcwpw2        |
| ENSMUSG00000015126 | 5661 Tsr3          |
| ENSMUSG00000026223 | 5662 Itm2c         |
| ENSMUSG00000023007 | 5663 Prpf40b       |
| ENSMUSG00000073514 | 5664 Dok6          |
| ENSMUSG00000066148 | 5665 Prpf4         |
| ENSMUSG00000039318 | 5666 Rab3gap2      |
| ENSMUSG00000003363 | 5667 Pld3          |
| ENSMUSG00000034850 | 5668 Tmem127       |

|                    |                |
|--------------------|----------------|
| ENSMUSG00000002881 | 5669 Nab1      |
| ENSMUSG00000038000 | 5670 Acd       |
| ENSMUSG00000061207 | 5671 Stk19     |
| ENSMUSG00000028108 | 5672 Ecm1      |
| ENSMUSG00000033429 | 5673 Mcee      |
| ENSMUSG00000031864 | 5674 Ints10    |
| ENSMUSG00000038705 | 5675 Gmeb2     |
| ENSMUSG00000039473 | 5676 Ubn1      |
| ENSMUSG00000057788 | 5677 Ddx49     |
| ENSMUSG00000026361 | 5678 Cdc73     |
| ENSMUSG00000063253 | 5679 Scoc      |
| ENSMUSG00000029816 | 5680 Gpnmb     |
| ENSMUSG00000026622 | 5681 Nek2      |
| ENSMUSG00000025792 | 5682 Slc25a10  |
| ENSMUSG00000027809 | 5683 Etfdh     |
| ENSMUSG00000000440 | 5684 Pparg     |
| ENSMUSG00000025716 | 5685 Myo3a     |
| ENSMUSG00000004562 | 5686 Arhgef40  |
| ENSMUSG00000022842 | 5687 Ece2      |
| ENSMUSG00000036208 | 5688 BC027231  |
| ENSMUSG00000036282 | 5689 Naa30     |
| ENSMUSG00000034875 | 5690 Nudt19    |
| ENSMUSG00000075703 | 5691 Ept1      |
| ENSMUSG00000027597 | 5692 Ahcy      |
| ENSMUSG00000024383 | 5693 Map3k2    |
| ENSMUSG00000021476 | 5694 Habp4     |
| ENSMUSG00000021054 | 5695 Sgpp1     |
| ENSMUSG00000037096 | 5696 Gm9762    |
| ENSMUSG00000022100 | 5697 Xpo7      |
| ENSMUSG00000005893 | 5698 Nr2c2     |
| ENSMUSG00000025354 | 5699 Dnajc14   |
| ENSMUSG00000030213 | 5700 Atf7ip    |
| ENSMUSG00000021112 | 5701 Mpp5      |
| ENSMUSG00000037098 | 5702 Rab11fip3 |
| ENSMUSG00000037674 | 5703 Rfx7      |
| ENSMUSG00000028218 | 5704 Fam92a    |
| ENSMUSG00000031402 | 5705 Mpp1      |
| ENSMUSG00000062761 | 5706 Zfp512    |
| ENSMUSG00000002028 | 5707 Kmt2a     |
| ENSMUSG00000062995 | 5708 Ica1      |
| ENSMUSG00000038023 | 5709 Atp6v0a2  |
| ENSMUSG00000003037 | 5710 Rab8a     |



|                    |                    |
|--------------------|--------------------|
| ENSMUSG00000027165 | 5711 B230118H07Rik |
| ENSMUSG00000027953 | 5712 Slc50a1       |
| ENSMUSG00000052395 | 5713 Rft1          |
| ENSMUSG00000024277 | 5714 Mapre2        |
| ENSMUSG00000050377 | 5715 Il31ra        |
| ENSMUSG00000020733 | 5716 Slc9a3r1      |
| ENSMUSG00000036667 | 5717 Tcaf1         |
| ENSMUSG00000105265 | 5718 Sox2ot        |
| ENSMUSG00000032067 | 5719 Pts           |
| ENSMUSG00000029911 | 5720 Ssbp1         |
| ENSMUSG00000079157 | 5721 Fam155a       |
| ENSMUSG00000025899 | 5722 Alkbh8        |
| ENSMUSG00000046138 | 5723 9930021J03Rik |
| ENSMUSG00000021621 | 5724 Zcchc9        |
| ENSMUSG00000036880 | 5725 Acaa2         |
| ENSMUSG00000025200 | 5726 Cwf19l1       |
| ENSMUSG00000020808 | 5727 Fam64a        |
| ENSMUSG00000042015 | 5728 Wdr41         |
| ENSMUSG00000043940 | 5729 Wdfy3         |
| ENSMUSG00000032997 | 5730 Chpf          |
| ENSMUSG00000040929 | 5731 Rfx3          |
| ENSMUSG00000047714 | 5732 Ppp1r2        |
| ENSMUSG00000028223 | 5733 Decr1         |
| ENSMUSG00000037204 | 5734 Atg101        |
| ENSMUSG00000105879 | 5735 Gm6204        |
| ENSMUSG00000078572 | 5736 1810043H04Rik |
| ENSMUSG00000006010 | 5737 BC003331      |
| ENSMUSG00000048920 | 5738 Fkrp          |
| ENSMUSG00000057551 | 5739 Zfp317        |
| ENSMUSG00000035310 | 5740 Lin54         |
| ENSMUSG00000084786 | 5741 Ubl5          |
| ENSMUSG00000039043 | 5742 Arpin         |
| ENSMUSG00000040936 | 5743 Ulk4          |
| ENSMUSG00000035559 | 5744 Mpv17l2       |
| ENSMUSG00000042594 | 5745 Sh2b3         |
| ENSMUSG00000026502 | 5746 Desi2         |
| ENSMUSG00000015776 | 5747 Med22         |
| ENSMUSG00000034040 | 5748 Wbscr17       |
| ENSMUSG00000042105 | 5749 Inpp5f        |
| ENSMUSG00000032024 | 5750 Clmp          |
| ENSMUSG00000027708 | 5751 Dcun1d1       |
| ENSMUSG00000018906 | 5752 P4ha2         |

|                    |                    |
|--------------------|--------------------|
| ENSMUSG00000021716 | 5753 Srek1ip1      |
| ENSMUSG00000059689 | 5754 Zfp637        |
| ENSMUSG00000038533 | 5755 Cbfa2t2       |
| ENSMUSG00000029810 | 5756 Tmem176b      |
| ENSMUSG00000024352 | 5757 Spata24       |
| ENSMUSG00000008035 | 5758 Mid1ip1       |
| ENSMUSG00000037089 | 5759 Slc35b2       |
| ENSMUSG00000039826 | 5760 Trub2         |
| ENSMUSG00000024732 | 5761 Ccdc86        |
| ENSMUSG00000037722 | 5762 Gnpat1        |
| ENSMUSG00000021767 | 5763 Kat6b         |
| ENSMUSG00000031827 | 5764 Cotl1         |
| ENSMUSG00000021770 | 5765 Samd8         |
| ENSMUSG00000029178 | 5766 Klf3          |
| ENSMUSG00000055653 | 5767 Gpc3          |
| ENSMUSG00000031023 | 5768 Akip1         |
| ENSMUSG00000024902 | 5769 Mrpl11        |
| ENSMUSG00000003135 | 5770 Cnot11        |
| ENSMUSG00000032309 | 5771 Fbxo22        |
| ENSMUSG00000048799 | 5772 Cep120        |
| ENSMUSG00000022721 | 5773 Trmt2a        |
| ENSMUSG00000036712 | 5774 Cyld          |
| ENSMUSG00000026696 | 5775 Vamp4         |
| ENSMUSG00000049643 | 5776 2310022A10Rik |
| ENSMUSG00000095478 | 5777 Gm9824        |
| ENSMUSG00000027291 | 5778 Vps39         |
| ENSMUSG00000061607 | 5779 Mdc1          |
| ENSMUSG00000061603 | 5780 Akap6         |
| ENSMUSG00000027822 | 5781 Slc33a1       |
| ENSMUSG00000027650 | 5782 Tti1          |
| ENSMUSG00000010721 | 5783 Lmbr1         |
| ENSMUSG00000027665 | 5784 Pik3ca        |
| ENSMUSG00000040455 | 5785 Usp45         |
| ENSMUSG00000024947 | 5786 Men1          |
| ENSMUSG00000025209 | 5787 Peo1          |
| ENSMUSG00000030225 | 5788 Dera          |
| ENSMUSG00000040928 | 5789 S100pbp       |
| ENSMUSG00000066491 | 5790 Gm6265        |
| ENSMUSG00000027331 | 5791 Knstrn        |
| ENSMUSG00000037605 | 5792 Adgrl3        |
| ENSMUSG00000031347 | 5793 Cetn2         |
| ENSMUSG00000050552 | 5794 Lamtor4       |

|                    |                    |
|--------------------|--------------------|
| ENSMUSG00000023795 | 5795 Pisd-ps2      |
| ENSMUSG00000055761 | 5796 Nkain3        |
| ENSMUSG00000035173 | 5797 Ccdc186       |
| ENSMUSG00000037486 | 5798 Asxl2         |
| ENSMUSG00000072825 | 5799 Cep170b       |
| ENSMUSG00000038298 | 5800 Pdzk1         |
| ENSMUSG00000031148 | 5801 Gpkow         |
| ENSMUSG00000051335 | 5802 Gfod1         |
| ENSMUSG00000041346 | 5803 Wrap53        |
| ENSMUSG00000047417 | 5804 Rexo1         |
| ENSMUSG00000073821 | 5805 8030451A03Rik |
| ENSMUSG00000021147 | 5806 Wdr37         |
| ENSMUSG00000063659 | 5807 Zbtb18        |
| ENSMUSG00000041540 | 5808 Sox5          |
| ENSMUSG00000004270 | 5809 Lpcat3        |
| ENSMUSG00000023030 | 5810 Slc11a2       |
| ENSMUSG00000014498 | 5811 Ankrd52       |
| ENSMUSG00000027942 | 5812 4933434E20Rik |
| ENSMUSG00000020032 | 5813 Nuak1         |
| ENSMUSG00000022389 | 5814 Tef           |
| ENSMUSG00000038079 | 5815 Tmem237       |
| ENSMUSG00000025169 | 5816 Ogfod3        |
| ENSMUSG00000021188 | 5817 Trip11        |
| ENSMUSG00000021670 | 5818 Hmgcr         |
| ENSMUSG00000085402 | 5819 Gm12111       |
| ENSMUSG00000032238 | 5820 Rora          |
| ENSMUSG00000003604 | 5821 Aven          |
| ENSMUSG00000001687 | 5822 Ubl3          |
| ENSMUSG00000026196 | 5823 Bard1         |
| ENSMUSG00000025986 | 5824 Slc39a10      |
| ENSMUSG00000021432 | 5825 Slc35b3       |
| ENSMUSG00000020770 | 5826 Unk           |
| ENSMUSG00000107614 | 5827 RP23-281L18.1 |
| ENSMUSG00000051730 | 5828 Mettl5        |
| ENSMUSG00000027285 | 5829 Haus2         |
| ENSMUSG00000031149 | 5830 Praf2         |
| ENSMUSG00000020415 | 5831 Pttg1         |
| ENSMUSG00000106906 | 5832 Gm34728       |
| ENSMUSG00000028256 | 5833 Odf2l         |
| ENSMUSG00000072582 | 5834 Ptrh2         |
| ENSMUSG00000089809 | 5835 A930011G23Rik |
| ENSMUSG00000026971 | 5836 Itgb6         |

|                     |                    |
|---------------------|--------------------|
| ENSMUSG00000049881  | 5837 2810025M15Rik |
| ENSMUSG00000084957  | 5838 Bbip1         |
| ENSMUSG00000031505  | 5839 Carkd         |
| ENSMUSG00000066151  | 5840 Fkbp15        |
| ENSMUSG00000040548  | 5841 Tex2          |
| ENSMUSG00000029598  | 5842 Plbd2         |
| ENSMUSG00000050530  | 5843 Fam171a1      |
| ENSMUSG00000072946  | 5844 Ptgr2         |
| ENSMUSG00000039478  | 5845 Micu3         |
| ENSMUSG00000028532  | 5846 Cachd1        |
| ENSMUSG00000035776  | 5847 Cd99l2        |
| ENSMUSG00000086784  | 5848 Isoc2a        |
| ENSMUSG00000051989  | 5849 Smim11        |
| ENSMUSG00000023919  | 5850 Cenpq         |
| ENSMUSG00000042790  | 5851 Rnf214        |
| ENSMUSG00000024581  | 5852 Napg          |
| ENSMUSG00000034442  | 5853 Trmt5         |
| ENSMUSG00000068015  | 5854 Lrch1         |
| ENSMUSG00000041303  | 5855 Gtf3c3        |
| ENSMUSG00000031556  | 5856 Tm2d2         |
| ENSMUSG00000014846  | 5857 Tppp3         |
| ENSMUSG00000032295  | 5858 Man2c1        |
| ENSMUSG00000032184  | 5859 Lysmd2        |
| ENSMUSG00000040356  | 5860 Skiv2l        |
| ENSMUSG000000108545 | 5861 RP24-138O17.3 |
| ENSMUSG00000029366  | 5862 Dck           |
| ENSMUSG00000041958  | 5863 Pigs          |
| ENSMUSG00000029070  | 5864 Mxra8         |
| ENSMUSG00000026860  | 5865 Sh3glb2       |
| ENSMUSG00000031736  | 5866 Crnde         |
| ENSMUSG00000042700  | 5867 Sipa1l1       |
| ENSMUSG00000042622  | 5868 Maff          |
| ENSMUSG00000001508  | 5869 Sgca          |
| ENSMUSG00000026604  | 5870 Ptpn14        |
| ENSMUSG00000036908  | 5871 Unc93b1       |
| ENSMUSG00000027900  | 5872 Dram2         |
| ENSMUSG00000023072  | 5873 Cep89         |
| ENSMUSG00000021094  | 5874 Dhrr7         |
| ENSMUSG00000047676  | 5875 Rpsa-ps10     |
| ENSMUSG00000026942  | 5876 Traf2         |
| ENSMUSG00000026887  | 5877 Mrrf          |
| ENSMUSG00000027742  | 5878 Cog6          |

|                     |                    |
|---------------------|--------------------|
| ENSMUSG00000037110  | 5879 Ralgapa2      |
| ENSMUSG00000040297  | 5880 Suco          |
| ENSMUSG00000022240  | 5881 Ctnnd2        |
| ENSMUSG00000036442  | 5882 Thap11        |
| ENSMUSG00000020019  | 5883 Ntn4          |
| ENSMUSG00000030613  | 5884 Ccdc90b       |
| ENSMUSG00000085070  | 5885 Gm13211       |
| ENSMUSG00000030652  | 5886 Coq7          |
| ENSMUSG00000031963  | 5887 Bmper         |
| ENSMUSG00000091329  | 5888 1700112D23Rik |
| ENSMUSG00000022940  | 5889 Pigp          |
| ENSMUSG00000028991  | 5890 Mtor          |
| ENSMUSG00000022144  | 5891 Gdnf          |
| ENSMUSG00000033054  | 5892 Npat          |
| ENSMUSG00000071337  | 5893 Tia1          |
| ENSMUSG000000104531 | 5894 Gm43731       |
| ENSMUSG00000030595  | 5895 Nfkbib        |
| ENSMUSG00000035093  | 5896 Secisbp2l     |
| ENSMUSG00000025485  | 5897 Ric8          |
| ENSMUSG00000037111  | 5898 Setd7         |
| ENSMUSG00000029405  | 5899 G3bp2         |
| ENSMUSG00000041718  | 5900 Alg13         |
| ENSMUSG000000106379 | 5901 Lhfpl3        |
| ENSMUSG00000055660  | 5902 Mettl4        |
| ENSMUSG00000027210  | 5903 Meis2         |
| ENSMUSG00000002379  | 5904 Ndufa11       |
| ENSMUSG00000036977  | 5905 Anapc10       |
| ENSMUSG00000052926  | 5906 Rnaseh2a      |
| ENSMUSG00000039316  | 5907 Rftn1         |
| ENSMUSG00000028988  | 5908 Ctnnbip1      |
| ENSMUSG00000085795  | 5909 Zfp703        |
| ENSMUSG00000048399  | 5910 Tprg          |
| ENSMUSG00000097183  | 5911 Gm17501       |
| ENSMUSG00000086068  | 5912 1700120G11Rik |
| ENSMUSG00000020056  | 5913 Ccdc53        |
| ENSMUSG00000024597  | 5914 Slc12a2       |
| ENSMUSG00000042460  | 5915 C1galt1       |
| ENSMUSG00000009640  | 5916 Dmap1         |
| ENSMUSG00000020308  | 5917 Tpgs1         |
| ENSMUSG000000106423 | 5918 Gm42825       |
| ENSMUSG00000072889  | 5919 Nfxl1         |
| ENSMUSG000000105157 | 5920 Gm42831       |

|                    |                    |
|--------------------|--------------------|
| ENSMUSG00000069255 | 5921 Dusp22        |
| ENSMUSG00000022414 | 5922 Tab1          |
| ENSMUSG00000031245 | 5923 Hmgn5         |
| ENSMUSG00000034259 | 5924 Exosc4        |
| ENSMUSG00000010045 | 5925 Tmem115       |
| ENSMUSG00000085396 | 5926 Firre         |
| ENSMUSG00000047719 | 5927 Ubiad1        |
| ENSMUSG00000037315 | 5928 Jade3         |
| ENSMUSG00000031783 | 5929 Polr2c        |
| ENSMUSG00000022476 | 5930 Polr3h        |
| ENSMUSG00000038544 | 5931 Inip          |
| ENSMUSG00000052407 | 5932 Ccdc171       |
| ENSMUSG00000031979 | 5933 Cog2          |
| ENSMUSG00000028833 | 5934 Ncdn          |
| ENSMUSG00000004415 | 5935 Col26a1       |
| ENSMUSG00000025324 | 5936 Atp10a        |
| ENSMUSG00000033060 | 5937 Lmo7          |
| ENSMUSG00000063838 | 5938 1700027J19Rik |
| ENSMUSG00000055334 | 5939 Snupn         |
| ENSMUSG00000085522 | 5940 4930556G01Rik |
| ENSMUSG00000025742 | 5941 Prps2         |
| ENSMUSG00000027306 | 5942 Nusap1        |
| ENSMUSG00000028893 | 5943 Sesn2         |
| ENSMUSG00000039662 | 5944 Icmt          |
| ENSMUSG00000024038 | 5945 Ndufv3        |
| ENSMUSG00000024589 | 5946 Nedd4l        |
| ENSMUSG00000028854 | 5947 Slc9a1        |
| ENSMUSG00000047766 | 5948 Lrrc49        |
| ENSMUSG00000039934 | 5949 Gsap          |
| ENSMUSG00000030555 | 5950 Ttc23         |
| ENSMUSG00000028452 | 5951 Vcp           |
| ENSMUSG00000043289 | 5952 Mei4          |
| ENSMUSG00000019863 | 5953 Qrsl1         |
| ENSMUSG00000031644 | 5954 Nek1          |
| ENSMUSG00000036368 | 5955 Rmdn2         |
| ENSMUSG00000034902 | 5956 Pip5k1c       |
| ENSMUSG00000059890 | 5957 Ube4a         |
| ENSMUSG00000036452 | 5958 Arhgap26      |
| ENSMUSG00000003573 | 5959 Homer3        |
| ENSMUSG00000038312 | 5960 Edem2         |
| ENSMUSG00000030811 | 5961 Fbxl19        |
| ENSMUSG00000021368 | 5962 Tbc1d7        |

|                     |                    |
|---------------------|--------------------|
| ENSMUSG00000014426  | 5963 Map3k4        |
| ENSMUSG00000021180  | 5964 Rps6ka5       |
| ENSMUSG000000085112 | 5965 A530072M11Rik |
| ENSMUSG000000070733 | 5966 Fryl          |
| ENSMUSG000000044795 | 5967 Cyb5d1        |
| ENSMUSG000000020451 | 5968 Limk2         |
| ENSMUSG000000031537 | 5969 Ikbkb         |
| ENSMUSG000000042581 | 5970 Thsd7b        |
| ENSMUSG000000040532 | 5971 Abhd11        |
| ENSMUSG000000034636 | 5972 Zyg11b        |
| ENSMUSG000000026605 | 5973 Cenpf         |
| ENSMUSG000000039199 | 5974 Zdhhc1        |
| ENSMUSG000000025825 | 5975 Iscu          |
| ENSMUSG000000029345 | 5976 Tfip11        |
| ENSMUSG000000020988 | 5977 L2hgdh        |
| ENSMUSG000000021302 | 5978 Ggps1         |
| ENSMUSG000000038861 | 5979 Pi4kb         |
| ENSMUSG000000029166 | 5980 Mapre3        |
| ENSMUSG000000002413 | 5981 Braf          |
| ENSMUSG000000027618 | 5982 Nfs1          |
| ENSMUSG000000014074 | 5983 Rnf168        |
| ENSMUSG000000021948 | 5984 Prkcd         |
| ENSMUSG000000035376 | 5985 Hacd2         |
| ENSMUSG000000085549 | 5986 1700047F07Rik |
| ENSMUSG000000006476 | 5987 Nsmf          |
| ENSMUSG000000022807 | 5988 Osbpl11       |
| ENSMUSG000000029802 | 5989 Abcg2         |
| ENSMUSG000000058070 | 5990 Eml1          |
| ENSMUSG000000078773 | 5991 Rad54b        |
| ENSMUSG000000073705 | 5992 Apitd1        |
| ENSMUSG000000021327 | 5993 Zkscan3       |
| ENSMUSG000000038658 | 5994 Ric1          |
| ENSMUSG000000004233 | 5995 Wars2         |
| ENSMUSG000000058239 | 5996 Usf2          |
| ENSMUSG000000034575 | 5997 Papd7         |
| ENSMUSG000000085632 | 5998 Gm12381       |
| ENSMUSG000000037395 | 5999 Rcor3         |
| ENSMUSG000000028344 | 6000 Invs          |
| ENSMUSG000000018143 | 6001 Mafk          |
| ENSMUSG000000070871 | 6002 Ccnyl1        |
| ENSMUSG000000031365 | 6003 Zfp275        |
| ENSMUSG000000021338 | 6004 Lrrc16a       |

|                     |                    |
|---------------------|--------------------|
| ENSMUSG00000033295  | 6005 Ptpf          |
| ENSMUSG00000021113  | 6006 Snapc1        |
| ENSMUSG00000102758  | 6007 Naaladl2      |
| ENSMUSG00000022195  | 6008 6030458C11Rik |
| ENSMUSG00000005442  | 6009 Cic           |
| ENSMUSG00000019813  | 6010 Cep57l1       |
| ENSMUSG000000036782 | 6011 Klhl13        |
| ENSMUSG000000030465 | 6012 Psd3          |
| ENSMUSG000000042992 | 6013 Borcs5        |
| ENSMUSG000000038679 | 6014 Trps1         |
| ENSMUSG000000026418 | 6015 Tnni1         |
| ENSMUSG000000027132 | 6016 Katnbl1       |
| ENSMUSG000000082319 | 6017 Gm8822        |
| ENSMUSG000000007570 | 6018 Fance         |
| ENSMUSG000000097180 | 6019 2700038G22Rik |
| ENSMUSG000000000804 | 6020 Usp32         |
| ENSMUSG000000006471 | 6021 Ndor1         |
| ENSMUSG000000024127 | 6022 Prepl         |
| ENSMUSG000000032409 | 6023 Atr           |
| ENSMUSG000000047996 | 6024 Prrg1         |
| ENSMUSG000000025795 | 6025 Rassf3        |
| ENSMUSG000000031969 | 6026 Acad8         |
| ENSMUSG000000035078 | 6027 Mtmr9         |
| ENSMUSG000000009733 | 6028 Tfcp2         |
| ENSMUSG000000015652 | 6029 Steap1        |
| ENSMUSG000000034485 | 6030 Uaca          |
| ENSMUSG000000014932 | 6031 Yes1          |
| ENSMUSG000000067365 | 6032 Tmem128       |
| ENSMUSG000000025538 | 6033 Sumf2         |
| ENSMUSG000000027606 | 6034 Dnajc5b       |
| ENSMUSG000000031521 | 6035 Aga           |
| ENSMUSG000000033014 | 6036 Trim33        |
| ENSMUSG000000022210 | 6037 Dhfs4         |
| ENSMUSG000000021532 | 6038 Fastkd3       |
| ENSMUSG00000101716  | 6039 Gm12057       |
| ENSMUSG000000026610 | 6040 Esrrg         |
| ENSMUSG000000021448 | 6041 Shc3          |
| ENSMUSG000000030059 | 6042 Tmf1          |
| ENSMUSG000000028228 | 6043 Cpne3         |
| ENSMUSG000000031461 | 6044 Myom2         |
| ENSMUSG000000020519 | 6045 Sap30l        |
| ENSMUSG000000099957 | 6046 2610027F03Rik |



|                     |                    |
|---------------------|--------------------|
| ENSMUSG00000033557  | 6047 Fam20b        |
| ENSMUSG00000027861  | 6048 Casq2         |
| ENSMUSG00000089911  | 6049 Hiat1         |
| ENSMUSG00000018846  | 6050 Pank3         |
| ENSMUSG00000042350  | 6051 Arel1         |
| ENSMUSG00000037104  | 6052 Socs5         |
| ENSMUSG00000097462  | 6053 9530026P05Rik |
| ENSMUSG00000017837  | 6054 Nkiras2       |
| ENSMUSG00000020598  | 6055 Nrcam         |
| ENSMUSG00000021785  | 6056 Ngly1         |
| ENSMUSG00000028980  | 6057 H6pd          |
| ENSMUSG00000003680  | 6058 Taf6l         |
| ENSMUSG00000049176  | 6059 Frmpd4        |
| ENSMUSG00000042742  | 6060 B630005N14Rik |
| ENSMUSG00000033885  | 6061 Pxx           |
| ENSMUSG00000004018  | 6062 Fancl         |
| ENSMUSG00000085071  | 6063 Gm14066       |
| ENSMUSG00000036305  | 6064 Rpl39-ps      |
| ENSMUSG00000017499  | 6065 Cdc6          |
| ENSMUSG00000028601  | 6066 Echdc2        |
| ENSMUSG00000035725  | 6067 Prkx          |
| ENSMUSG00000069910  | 6068 Spdl1         |
| ENSMUSG00000029217  | 6069 Tec           |
| ENSMUSG00000019715  | 6070 Gle1          |
| ENSMUSG00000032280  | 6071 Tle3          |
| ENSMUSG00000030671  | 6072 Pde3b         |
| ENSMUSG00000041354  | 6073 Rgl2          |
| ENSMUSG00000024050  | 6074 Wiz           |
| ENSMUSG00000022475  | 6075 Hdac7         |
| ENSMUSG00000016181  | 6076 Diexf         |
| ENSMUSG00000019470  | 6077 Xab2          |
| ENSMUSG00000032469  | 6078 Dbr1          |
| ENSMUSG00000091625  | 6079 Lsm5          |
| ENSMUSG00000040761  | 6080 Spen          |
| ENSMUSG00000008305  | 6081 Tle1          |
| ENSMUSG00000015112  | 6082 Slc25a13      |
| ENSMUSG00000037416  | 6083 Dmxx1         |
| ENSMUSG00000060427  | 6084 Zfp868        |
| ENSMUSG00000001986  | 6085 Gria3         |
| ENSMUSG000000057098 | 6086 Ebf1          |
| ENSMUSG00000020133  | 6087 2310011J03Rik |
| ENSMUSG00000044176  | 6088 Spink10       |

|                     |                    |
|---------------------|--------------------|
| ENSMUSG00000003528  | 6089 Slc25a1       |
| ENSMUSG00000024791  | 6090 Cdca5         |
| ENSMUSG00000015461  | 6091 Atf6b         |
| ENSMUSG00000029192  | 6092 Tbc1d14       |
| ENSMUSG00000042570  | 6093 Mier2         |
| ENSMUSG00000030533  | 6094 Unc45a        |
| ENSMUSG00000073155  | 6095 1810058I24Rik |
| ENSMUSG00000024525  | 6096 Impa2         |
| ENSMUSG00000056880  | 6097 Gad1          |
| ENSMUSG00000022339  | 6098 Ebag9         |
| ENSMUSG00000068114  | 6099 Ccdc134       |
| ENSMUSG00000014905  | 6100 Dnaja9        |
| ENSMUSG000000105020 | 6101 Gm7205        |
| ENSMUSG00000035305  | 6102 Ror1          |
| ENSMUSG00000009030  | 6103 Pdcl          |
| ENSMUSG00000031626  | 6104 Sorbs2        |
| ENSMUSG00000023809  | 6105 Rps6ka2       |
| ENSMUSG00000001157  | 6106 Gmcl1         |
| ENSMUSG00000021461  | 6107 Fancd         |
| ENSMUSG00000028517  | 6108 Ppap2b        |
| ENSMUSG00000019809  | 6109 Pex3          |
| ENSMUSG00000028271  | 6110 Gtf2b         |
| ENSMUSG00000061104  | 6111 Gm10094       |
| ENSMUSG00000060121  | 6112 Gemin2        |
| ENSMUSG00000028152  | 6113 Tspan5        |
| ENSMUSG00000045160  | 6114 Bola3         |
| ENSMUSG00000024580  | 6115 Grpel2        |
| ENSMUSG00000033099  | 6116 Nol12         |
| ENSMUSG00000029480  | 6117 Dhx37         |
| ENSMUSG00000025509  | 6118 Pnpla2        |
| ENSMUSG00000001150  | 6119 Mcm3ap        |
| ENSMUSG00000017386  | 6120 Traf4         |
| ENSMUSG00000022656  | 6121 Pvrl3         |
| ENSMUSG00000039585  | 6122 Myo9a         |
| ENSMUSG00000073016  | 6123 Uprt          |
| ENSMUSG00000060657  | 6124 Marf1         |
| ENSMUSG00000050079  | 6125 Rspry1        |
| ENSMUSG00000020527  | 6126 Myo19         |
| ENSMUSG000000103409 | 6127 Lsmem2        |
| ENSMUSG00000029516  | 6128 Cit           |
| ENSMUSG00000035637  | 6129 Grhpr         |
| ENSMUSG00000040528  | 6130 Milr1         |

|                    |                    |
|--------------------|--------------------|
| ENSMUSG00000091476 | 6131 Gm16432       |
| ENSMUSG00000027160 | 6132 Ccdc34        |
| ENSMUSG00000026848 | 6133 Tor1b         |
| ENSMUSG00000044250 | 6134 Pced1b        |
| ENSMUSG00000034201 | 6135 Gas2l1        |
| ENSMUSG00000039427 | 6136 Alg1          |
| ENSMUSG00000022828 | 6137 Gtf2e1        |
| ENSMUSG00000024241 | 6138 Sos1          |
| ENSMUSG00000043535 | 6139 Setx          |
| ENSMUSG00000021023 | 6140 1110008L16Rik |
| ENSMUSG00000024970 | 6141 Al846148      |
| ENSMUSG00000021068 | 6142 Nin           |
| ENSMUSG00000029283 | 6143 Cdc7          |
| ENSMUSG00000055897 | 6144 Ppp4r1l-ps    |
| ENSMUSG00000025086 | 6145 Trub1         |
| ENSMUSG00000063145 | 6146 Bbs5          |
| ENSMUSG00000058793 | 6147 Cds2          |
| ENSMUSG00000022722 | 6148 Arl6          |
| ENSMUSG00000026837 | 6149 Col5a1        |
| ENSMUSG00000032498 | 6150 Mlh1          |
| ENSMUSG00000028630 | 6151 Dyrk2         |
| ENSMUSG00000053730 | 6152 Tmem39b       |
| ENSMUSG00000046020 | 6153 Pofut1        |
| ENSMUSG00000031608 | 6154 Galnt7        |
| ENSMUSG00000025779 | 6155 Ly96          |
| ENSMUSG00000033788 | 6156 Dysf          |
| ENSMUSG00000048706 | 6157 Lurap1l       |
| ENSMUSG00000069844 | 6158 Sco1          |
| ENSMUSG00000033065 | 6159 Pfkf          |
| ENSMUSG00000054648 | 6160 Zfp869        |
| ENSMUSG00000075232 | 6161 Amd1          |
| ENSMUSG00000030816 | 6162 Rnf40         |
| ENSMUSG00000030527 | 6163 Crtc3         |
| ENSMUSG00000025262 | 6164 Fam120c       |
| ENSMUSG00000017978 | 6165 Cadps2        |
| ENSMUSG00000030316 | 6166 Tamm41        |
| ENSMUSG00000028944 | 6167 Prkag2        |
| ENSMUSG00000021666 | 6168 Gfm2          |
| ENSMUSG00000018983 | 6169 E2f2          |
| ENSMUSG00000075376 | 6170 Rc3h2         |
| ENSMUSG00000012519 | 6171 Mlkl          |
| ENSMUSG00000036639 | 6172 Nudt1         |

|                    |                 |
|--------------------|-----------------|
| ENSMUSG00000020413 | 6173 Hus1       |
| ENSMUSG00000081087 | 6174 Rps15a-ps7 |
| ENSMUSG00000064061 | 6175 Dzip3      |
| ENSMUSG00000004071 | 6176 Cdip1      |
| ENSMUSG00000063952 | 6177 Brpf3      |
| ENSMUSG00000036225 | 6178 Kctd1      |
| ENSMUSG00000039879 | 6179 Heca       |
| ENSMUSG00000020495 | 6180 Smg8       |
| ENSMUSG00000039205 | 6181 Ciz1       |
| ENSMUSG00000029397 | 6182 Rchy1      |
| ENSMUSG00000015943 | 6183 Bola1      |
| ENSMUSG00000048445 | 6184 Ccdc57     |
| ENSMUSG00000035898 | 6185 Uba6       |
| ENSMUSG00000030534 | 6186 Vps33b     |
| ENSMUSG00000029440 | 6187 Psmc9      |
| ENSMUSG00000027639 | 6188 Samhd1     |
| ENSMUSG00000021676 | 6189 Iqgap2     |
| ENSMUSG00000034926 | 6190 Dhcr24     |
| ENSMUSG00000039759 | 6191 Thap3      |
| ENSMUSG00000086193 | 6192 Gm11508    |
| ENSMUSG00000029759 | 6193 Pon3       |
| ENSMUSG00000055447 | 6194 Cd47       |
| ENSMUSG00000026181 | 6195 Ppm1f      |
| ENSMUSG00000034055 | 6196 Phka1      |
| ENSMUSG00000023330 | 6197 Dtwf1      |
| ENSMUSG00000057530 | 6198 Ece1       |
| ENSMUSG00000022034 | 6199 Esco2      |
| ENSMUSG00000034300 | 6200 Fam53c     |
| ENSMUSG00000018442 | 6201 Derl2      |
| ENSMUSG00000004462 | 6202 Tbcc1      |
| ENSMUSG00000011837 | 6203 Snapc2     |
| ENSMUSG00000085147 | 6204 Gm12609    |
| ENSMUSG00000041731 | 6205 Pgm5       |
| ENSMUSG00000074918 | 6206 Inafm2     |
| ENSMUSG00000024875 | 6207 Yif1a      |
| ENSMUSG00000027272 | 6208 Ubr1       |
| ENSMUSG00000036391 | 6209 Sec24a     |
| ENSMUSG00000022817 | 6210 Itgb5      |
| ENSMUSG00000093930 | 6211 Hmgcs1     |
| ENSMUSG00000021905 | 6212 Dph3       |
| ENSMUSG00000020216 | 6213 Jsrf1      |
| ENSMUSG00000087336 | 6214 Gm15860    |

|                    |                    |
|--------------------|--------------------|
| ENSMUSG00000026933 | 6215 Camsap1       |
| ENSMUSG00000035666 | 6216 Gtf3c4        |
| ENSMUSG00000085431 | 6217 4930440I19Rik |
| ENSMUSG00000021962 | 6218 Dcp1a         |
| ENSMUSG00000040365 | 6219 Trim41        |
| ENSMUSG00000097066 | 6220 Platr2        |
| ENSMUSG00000026078 | 6221 Pdcl3         |
| ENSMUSG00000035158 | 6222 Mitf          |
| ENSMUSG00000032553 | 6223 Srprb         |
| ENSMUSG00000036636 | 6224 Clcn7         |
| ENSMUSG00000003526 | 6225 Prodh         |
| ENSMUSG00000060260 | 6226 Pwwp2b        |
| ENSMUSG00000047161 | 6227 Chst9         |
| ENSMUSG00000029547 | 6228 Ints1         |
| ENSMUSG00000029863 | 6229 Casp2         |
| ENSMUSG00000033389 | 6230 Arhgap44      |
| ENSMUSG00000097392 | 6231 D930016D06Rik |
| ENSMUSG00000033319 | 6232 Fem1c         |
| ENSMUSG00000037787 | 6233 Apopt1        |
| ENSMUSG00000049690 | 6234 Nckap5        |
| ENSMUSG00000085102 | 6235 1700010K24Rik |
| ENSMUSG00000066571 | 6236 4931406P16Rik |
| ENSMUSG00000020232 | 6237 Hmg20b        |
| ENSMUSG00000074026 | 6238 Gm6091        |
| ENSMUSG00000021692 | 6239 Dimt1         |
| ENSMUSG00000022544 | 6240 Eef2kmt       |
| ENSMUSG00000038046 | 6241 Rnmtl1        |
| ENSMUSG00000021596 | 6242 Mctp1         |
| ENSMUSG00000057133 | 6243 Chd6          |
| ENSMUSG00000036461 | 6244 Elf1          |
| ENSMUSG00000050310 | 6245 Rictor        |
| ENSMUSG00000020623 | 6246 Map2k6        |
| ENSMUSG00000080775 | 6247 Gm6368        |
| ENSMUSG00000054874 | 6248 Pcnxl3        |
| ENSMUSG00000061288 | 6249 Taok3         |
| ENSMUSG00000038766 | 6250 Gabpb2        |
| ENSMUSG00000022370 | 6251 Mrpl13        |
| ENSMUSG00000024462 | 6252 Gabbr1        |
| ENSMUSG00000003824 | 6253 Syce2         |
| ENSMUSG00000047694 | 6254 Yipf6         |
| ENSMUSG00000018547 | 6255 Pip4k2b       |
| ENSMUSG00000021504 | 6256 B4galt7       |

|                    |                    |
|--------------------|--------------------|
| ENSMUSG00000046079 | 6257 Lrrc8d        |
| ENSMUSG00000006262 | 6258 Mob1b         |
| ENSMUSG00000031889 | 6259 D230025D16Rik |
| ENSMUSG00000035234 | 6260 Fam175a       |
| ENSMUSG00000009569 | 6261 Mkl2          |
| ENSMUSG00000042055 | 6262 Wdr11         |
| ENSMUSG00000029103 | 6263 Lrpap1        |
| ENSMUSG00000028708 | 6264 Mknk1         |
| ENSMUSG00000052428 | 6265 Tmco1         |
| ENSMUSG00000026342 | 6266 Slc35f5       |
| ENSMUSG00000028689 | 6267 Ccdc163       |
| ENSMUSG00000040859 | 6268 Bsdcl         |
| ENSMUSG00000056870 | 6269 Gulp1         |
| ENSMUSG00000002343 | 6270 Armc6         |
| ENSMUSG00000082691 | 6271 Dynlt1-ps1    |
| ENSMUSG00000033222 | 6272 Ttf2          |
| ENSMUSG00000021036 | 6273 Sptlc2        |
| ENSMUSG00000084260 | 6274 Gm12844       |
| ENSMUSG00000034586 | 6275 Hid1          |
| ENSMUSG00000028229 | 6276 Rmdn1         |
| ENSMUSG00000020289 | 6277 Nprl3         |
| ENSMUSG00000028582 | 6278 Cc2d1b        |
| ENSMUSG00000033502 | 6279 Cdc14a        |
| ENSMUSG00000041426 | 6280 Hibch         |
| ENSMUSG00000031993 | 6281 Snx19         |
| ENSMUSG00000048970 | 6282 C1galt1c1     |
| ENSMUSG00000059602 | 6283 Syn3          |
| ENSMUSG00000020910 | 6284 Adprm         |
| ENSMUSG00000019984 | 6285 Med23         |
| ENSMUSG00000052085 | 6286 Dock8         |
| ENSMUSG00000048696 | 6287 Mex3d         |
| ENSMUSG00000002459 | 6288 Rgs20         |
| ENSMUSG00000026754 | 6289 Golga1        |
| ENSMUSG00000023018 | 6290 Smarcd1       |
| ENSMUSG00000030610 | 6291 Det1          |
| ENSMUSG00000029249 | 6292 Rest          |
| ENSMUSG00000063887 | 6293 Nlgn1         |
| ENSMUSG00000022742 | 6294 Cpox          |
| ENSMUSG00000039458 | 6295 Mtmr12        |
| ENSMUSG00000032905 | 6296 Atg12         |
| ENSMUSG00000045973 | 6297 Slc25a51      |
| ENSMUSG00000020087 | 6298 Tysnd1        |

|                    |                    |
|--------------------|--------------------|
| ENSMUSG00000073139 | 6299 BC023829      |
| ENSMUSG00000030397 | 6300 Mark4         |
| ENSMUSG00000002608 | 6301 Ccdc97        |
| ENSMUSG00000070509 | 6302 Rgma          |
| ENSMUSG00000092094 | 6303 Zfp804b       |
| ENSMUSG00000044912 | 6304 Syt16         |
| ENSMUSG00000064358 | 6305 mt-Co3        |
| ENSMUSG00000052584 | 6306 Serp2         |
| ENSMUSG00000028551 | 6307 Cdkn2c        |
| ENSMUSG00000037234 | 6308 Hook3         |
| ENSMUSG00000058486 | 6309 Wdr91         |
| ENSMUSG00000026924 | 6310 Sec16a        |
| ENSMUSG00000069094 | 6311 Pde7a         |
| ENSMUSG00000001173 | 6312 Ocr1          |
| ENSMUSG00000079884 | 6313 Gm10698       |
| ENSMUSG00000068663 | 6314 Clec16a       |
| ENSMUSG00000031201 | 6315 Brcc3         |
| ENSMUSG00000030741 | 6316 Spns1         |
| ENSMUSG00000034729 | 6317 Mrps10        |
| ENSMUSG00000047414 | 6318 Flrt2         |
| ENSMUSG00000019578 | 6319 Ubxn6         |
| ENSMUSG00000001998 | 6320 Ap4e1         |
| ENSMUSG00000038056 | 6321 Kmt2c         |
| ENSMUSG00000097560 | 6322 Gm26904       |
| ENSMUSG00000014763 | 6323 Fam120b       |
| ENSMUSG00000040669 | 6324 Phc1          |
| ENSMUSG00000021697 | 6325 Depdc1b       |
| ENSMUSG00000027487 | 6326 Cdk5rap1      |
| ENSMUSG00000044098 | 6327 Rsbn1         |
| ENSMUSG00000026797 | 6328 Stxbp1        |
| ENSMUSG00000042066 | 6329 Tmcc2         |
| ENSMUSG00000041078 | 6330 Grid1         |
| ENSMUSG00000031431 | 6331 Tsc22d3       |
| ENSMUSG00000019731 | 6332 Slc35e1       |
| ENSMUSG00000022454 | 6333 Nell2         |
| ENSMUSG00000002279 | 6334 Lmf1          |
| ENSMUSG00000071647 | 6335 Eml3          |
| ENSMUSG00000107847 | 6336 RP23-374N15.2 |
| ENSMUSG00000073856 | 6337 Iqck          |
| ENSMUSG00000025374 | 6338 Nabp2         |
| ENSMUSG00000085236 | 6339 2610206C17Rik |
| ENSMUSG00000074754 | 6340 Gm561         |

|                    |                    |
|--------------------|--------------------|
| ENSMUSG00000024830 | 6341 Rps6kb2       |
| ENSMUSG00000075555 | 6342 Gm10863       |
| ENSMUSG00000034675 | 6343 Dbn1          |
| ENSMUSG00000040820 | 6344 Hlcs          |
| ENSMUSG00000020359 | 6345 Phykpl        |
| ENSMUSG00000039715 | 6346 Wdr34         |
| ENSMUSG00000033792 | 6347 Atp7a         |
| ENSMUSG00000042197 | 6348 Zfp451        |
| ENSMUSG00000034795 | 6349 Ccdc122       |
| ENSMUSG00000022885 | 6350 St6gal1       |
| ENSMUSG00000059878 | 6351 Zfp422        |
| ENSMUSG00000032783 | 6352 Troap         |
| ENSMUSG00000000902 | 6353 Smarcb1       |
| ENSMUSG00000030450 | 6354 Oca2          |
| ENSMUSG00000068399 | 6355 Gm7247        |
| ENSMUSG00000024776 | 6356 Stambpl1      |
| ENSMUSG00000037022 | 6357 Mmaa          |
| ENSMUSG00000015189 | 6358 Casd1         |
| ENSMUSG00000006215 | 6359 Zbtb17        |
| ENSMUSG00000034211 | 6360 Mrps17        |
| ENSMUSG00000037306 | 6361 Man1c1        |
| ENSMUSG00000053329 | 6362 D10Jhu81e     |
| ENSMUSG00000108289 | 6363 RP23-322E20.9 |
| ENSMUSG00000028743 | 6364 Akr7a5        |
| ENSMUSG00000027651 | 6365 Rprd1b        |
| ENSMUSG00000022528 | 6366 Hes1          |
| ENSMUSG00000036955 | 6367 Kif1bp        |
| ENSMUSG00000103188 | 6368 Gm37093       |
| ENSMUSG00000010290 | 6369 AI597479      |
| ENSMUSG00000068523 | 6370 Gng5          |
| ENSMUSG00000033697 | 6371 Arhgap39      |
| ENSMUSG00000033938 | 6372 Ndufb7        |
| ENSMUSG00000022856 | 6373 Tmem41a       |
| ENSMUSG00000026705 | 6374 Klhl20        |
| ENSMUSG00000037992 | 6375 Rara          |
| ENSMUSG00000067942 | 6376 Zfp160        |
| ENSMUSG00000038121 | 6377 Fam210a       |
| ENSMUSG00000027624 | 6378 Epb41l1       |
| ENSMUSG00000097775 | 6379 4931440J10Rik |
| ENSMUSG00000056962 | 6380 Jmjd6         |
| ENSMUSG00000087174 | 6381 5530601H04Rik |
| ENSMUSG00000035051 | 6382 Dhx57         |



|                    |                    |
|--------------------|--------------------|
| ENSMUSG00000028920 | 6383 Fbxo42        |
| ENSMUSG00000022335 | 6384 Zfat          |
| ENSMUSG00000042507 | 6385 Elmsan1       |
| ENSMUSG00000026459 | 6386 Myog          |
| ENSMUSG00000050541 | 6387 Adra1b        |
| ENSMUSG00000029655 | 6388 N4bp2l2       |
| ENSMUSG00000039031 | 6389 Arhgap18      |
| ENSMUSG00000020792 | 6390 Exoc7         |
| ENSMUSG00000031600 | 6391 Vps37a        |
| ENSMUSG00000020134 | 6392 Peli1         |
| ENSMUSG00000025762 | 6393 Larp1b        |
| ENSMUSG00000060739 | 6394 Nsa2          |
| ENSMUSG00000022911 | 6395 Arl13b        |
| ENSMUSG00000034218 | 6396 Atm           |
| ENSMUSG00000022131 | 6397 Gpr180        |
| ENSMUSG00000000581 | 6398 C1d           |
| ENSMUSG00000029681 | 6399 Bcl7b         |
| ENSMUSG00000030706 | 6400 Mrpl48        |
| ENSMUSG00000058729 | 6401 Lin9          |
| ENSMUSG00000079442 | 6402 St6galnac4    |
| ENSMUSG00000024913 | 6403 Lrp5          |
| ENSMUSG00000073158 | 6404 9030624G23Rik |
| ENSMUSG00000036968 | 6405 Cnpy4         |
| ENSMUSG00000015354 | 6406 Pcolce2       |
| ENSMUSG00000028048 | 6407 Gba           |
| ENSMUSG00000057506 | 6408 Bloc1s2       |
| ENSMUSG00000048833 | 6409 Slc39a9       |
| ENSMUSG00000061086 | 6410 Myl4          |
| ENSMUSG00000038982 | 6411 Bloc1s5       |
| ENSMUSG00000030255 | 6412 Sspn          |
| ENSMUSG00000032869 | 6413 Psmf1         |
| ENSMUSG00000025969 | 6414 Nrp2          |
| ENSMUSG00000020122 | 6415 Egfr          |
| ENSMUSG00000071866 | 6416 Ppia          |
| ENSMUSG00000091512 | 6417 Lamtor3       |
| ENSMUSG00000098108 | 6418 Gm27008       |
| ENSMUSG00000031393 | 6419 Mecp2         |
| ENSMUSG00000039298 | 6420 Cdk5rap2      |
| ENSMUSG00000029392 | 6421 Rilpl1        |
| ENSMUSG00000025216 | 6422 Lbx1          |
| ENSMUSG00000056073 | 6423 Grik2         |
| ENSMUSG00000038463 | 6424 Olfml2b       |

|                    |                    |
|--------------------|--------------------|
| ENSMUSG00000078681 | 6425 Tm2d3         |
| ENSMUSG00000105039 | 6426 Gm42637       |
| ENSMUSG00000059820 | 6427 AU019823      |
| ENSMUSG00000041161 | 6428 Otud3         |
| ENSMUSG00000038456 | 6429 Dennd2a       |
| ENSMUSG00000020827 | 6430 Mink1         |
| ENSMUSG00000049489 | 6431 Fam58b        |
| ENSMUSG00000049323 | 6432 Smcr8         |
| ENSMUSG00000024726 | 6433 Carnmt1       |
| ENSMUSG00000028106 | 6434 Rprd2         |
| ENSMUSG00000024069 | 6435 Slc30a6       |
| ENSMUSG00000020807 | 6436 4933427D14Rik |
| ENSMUSG00000025576 | 6437 Rbfox3        |
| ENSMUSG00000059058 | 6438 Tma7-ps       |
| ENSMUSG00000044864 | 6439 Ankrd50       |
| ENSMUSG00000030279 | 6440 C2cd5         |
| ENSMUSG00000031379 | 6441 Pir           |
| ENSMUSG00000032281 | 6442 Acsbg1        |
| ENSMUSG00000028706 | 6443 Nsun4         |
| ENSMUSG00000028282 | 6444 Casp8ap2      |
| ENSMUSG00000075053 | 6445 Vdac3-ps1     |
| ENSMUSG00000098040 | 6446 Gm20757       |
| ENSMUSG00000021556 | 6447 Golm1         |
| ENSMUSG00000032757 | 6448 Bet1          |
| ENSMUSG00000050199 | 6449 Lgr4          |
| ENSMUSG00000031093 | 6450 Dock11        |
| ENSMUSG00000020493 | 6451 Prr11         |
| ENSMUSG00000015790 | 6452 Surf1         |
| ENSMUSG00000031075 | 6453 Ano1          |
| ENSMUSG00000012422 | 6454 Tmem167       |
| ENSMUSG00000105471 | 6455 A430073D23Rik |
| ENSMUSG00000029475 | 6456 Kdm2b         |
| ENSMUSG00000035399 | 6457 Oser1         |
| ENSMUSG00000029334 | 6458 Prkg2         |
| ENSMUSG00000023980 | 6459 Taf8          |
| ENSMUSG00000048118 | 6460 Arid4a        |
| ENSMUSG00000070632 | 6461 Btbd8         |
| ENSMUSG00000097772 | 6462 5430416N02Rik |
| ENSMUSG00000029463 | 6463 Fam216a       |
| ENSMUSG00000017670 | 6464 Elmo2         |
| ENSMUSG00000056367 | 6465 Actr3b        |
| ENSMUSG00000038473 | 6466 Nos1ap        |

|                    |                    |
|--------------------|--------------------|
| ENSMUSG00000038886 | 6467 Man2a2        |
| ENSMUSG00000058388 | 6468 Phtf1         |
| ENSMUSG00000038628 | 6469 Polr3k        |
| ENSMUSG00000002332 | 6470 Dhrrs1        |
| ENSMUSG00000099906 | 6471 Gm28653       |
| ENSMUSG00000034974 | 6472 Dapk3         |
| ENSMUSG00000029670 | 6473 Ing3          |
| ENSMUSG00000106245 | 6474 Gm43824       |
| ENSMUSG00000021254 | 6475 Gpatch2l      |
| ENSMUSG00000020882 | 6476 Cacnb1        |
| ENSMUSG00000037692 | 6477 Ahdc1         |
| ENSMUSG00000024302 | 6478 Dtna          |
| ENSMUSG00000021738 | 6479 Atxn7         |
| ENSMUSG00000018669 | 6480 Cdk5rap3      |
| ENSMUSG00000052446 | 6481 Zfp961        |
| ENSMUSG00000021340 | 6482 Gpld1         |
| ENSMUSG00000003721 | 6483 Insig2        |
| ENSMUSG00000040018 | 6484 Cox15         |
| ENSMUSG00000020092 | 6485 Pald1         |
| ENSMUSG00000046010 | 6486 Zfp830        |
| ENSMUSG00000033964 | 6487 Zbtb41        |
| ENSMUSG00000037112 | 6488 Sik2          |
| ENSMUSG00000041406 | 6489 BC055324      |
| ENSMUSG00000083482 | 6490 Gm14706       |
| ENSMUSG00000031858 | 6491 Mau2          |
| ENSMUSG00000022865 | 6492 Cxadr         |
| ENSMUSG00000040312 | 6493 Cchcr1        |
| ENSMUSG00000097098 | 6494 9330111N05Rik |
| ENSMUSG00000029363 | 6495 Rfc5          |
| ENSMUSG00000030203 | 6496 Dusp16        |
| ENSMUSG00000052581 | 6497 Lrrtm4        |
| ENSMUSG00000039740 | 6498 Alg2          |
| ENSMUSG00000023940 | 6499 Sgol1         |
| ENSMUSG00000070953 | 6500 Rabepk        |
| ENSMUSG00000045302 | 6501 Preb          |
| ENSMUSG00000039476 | 6502 Prrx2         |
| ENSMUSG00000024754 | 6503 Tmem2         |
| ENSMUSG00000029402 | 6504 Snrnp35       |
| ENSMUSG00000032537 | 6505 Ephb1         |
| ENSMUSG00000039497 | 6506 Dse           |
| ENSMUSG00000027684 | 6507 Mecom         |
| ENSMUSG00000019794 | 6508 Katna1        |

|                    |                    |
|--------------------|--------------------|
| ENSMUSG00000048495 | 6509 Tyw5          |
| ENSMUSG00000042529 | 6510 Kcnj12        |
| ENSMUSG00000036095 | 6511 Dgkb          |
| ENSMUSG00000034445 | 6512 Cyb561a3      |
| ENSMUSG00000062580 | 6513 Timm17a       |
| ENSMUSG00000074579 | 6514 Lekr1         |
| ENSMUSG00000075520 | 6515 Malrd1        |
| ENSMUSG00000010830 | 6516 Kdelr3        |
| ENSMUSG00000025217 | 6517 Btrc          |
| ENSMUSG00000097277 | 6518 2900076A07Rik |
| ENSMUSG00000038665 | 6519 Dgki          |
| ENSMUSG00000034412 | 6520 Tbc1d10a      |
| ENSMUSG00000052477 | 6521 C130026I21Rik |
| ENSMUSG00000098284 | 6522 A330093E20Rik |
| ENSMUSG00000062127 | 6523 Cttnbp2nl     |
| ENSMUSG00000058267 | 6524 Mrps14        |
| ENSMUSG00000048429 | 6525 1810026J23Rik |
| ENSMUSG00000042229 | 6526 Rabif         |
| ENSMUSG00000028906 | 6527 Epb41         |
| ENSMUSG00000021916 | 6528 Glt8d1        |
| ENSMUSG00000021866 | 6529 Anxa11        |
| ENSMUSG00000020334 | 6530 Slc22a4       |
| ENSMUSG00000026839 | 6531 Upp2          |
| ENSMUSG00000024246 | 6532 Thumpd2       |
| ENSMUSG00000030513 | 6533 Pcsk6         |
| ENSMUSG00000052539 | 6534 Magi3         |
| ENSMUSG00000052387 | 6535 Trpm3         |
| ENSMUSG00000039770 | 6536 Ypel5         |
| ENSMUSG00000057455 | 6537 Rit2          |
| ENSMUSG00000034194 | 6538 R3hcc1        |
| ENSMUSG00000027698 | 6539 Nceh1         |
| ENSMUSG00000061859 | 6540 Inadl         |
| ENSMUSG00000028800 | 6541 Hdac1         |
| ENSMUSG00000038827 | 6542 Fam206a       |
| ENSMUSG00000051586 | 6543 Mical3        |
| ENSMUSG00000040446 | 6544 Rprd1a        |
| ENSMUSG00000003199 | 6545 Mpnd          |
| ENSMUSG00000047909 | 6546 Ankrd16       |
| ENSMUSG00000079502 | 6547 1700101E01Rik |
| ENSMUSG00000070939 | 6548 Tgfbrap1      |
| ENSMUSG00000004952 | 6549 Rasa4         |
| ENSMUSG00000041035 | 6550 Dpcd          |

|                    |                    |
|--------------------|--------------------|
| ENSMUSG00000026611 | 6551 Spata17       |
| ENSMUSG00000035047 | 6552 Kri1          |
| ENSMUSG00000029836 | 6553 Cbx3          |
| ENSMUSG00000014550 | 6554 Rbsn          |
| ENSMUSG00000007682 | 6555 Dio2          |
| ENSMUSG00000021978 | 6556 Extl3         |
| ENSMUSG00000033364 | 6557 Usp37         |
| ENSMUSG00000038365 | 6558 Fbxo25        |
| ENSMUSG00000019779 | 6559 Frk           |
| ENSMUSG00000084885 | 6560 3010001F23Rik |
| ENSMUSG00000032434 | 6561 Cmtm6         |
| ENSMUSG00000016495 | 6562 Plgrkt        |
| ENSMUSG00000029376 | 6563 Mthfd2l       |
| ENSMUSG00000042719 | 6564 Naa25         |
| ENSMUSG00000096975 | 6565 Gm16386       |
| ENSMUSG00000026036 | 6566 Nif3l1        |
| ENSMUSG00000052430 | 6567 Bmpr1b        |
| ENSMUSG00000039523 | 6568 Cep104        |
| ENSMUSG00000002546 | 6569 Golga2        |
| ENSMUSG00000041570 | 6570 Camsap2       |
| ENSMUSG00000051615 | 6571 Rap2a         |
| ENSMUSG00000039405 | 6572 Prss23        |
| ENSMUSG00000028383 | 6573 Hsdl2         |
| ENSMUSG00000028613 | 6574 Lrp8          |
| ENSMUSG00000030525 | 6575 Chrna7        |
| ENSMUSG00000056310 | 6576 Tyw1          |
| ENSMUSG00000044991 | 6577 1110034G24Rik |
| ENSMUSG00000062627 | 6578 Mysm1         |
| ENSMUSG00000063801 | 6579 Ap3s2         |
| ENSMUSG00000024319 | 6580 Vps52         |
| ENSMUSG00000032402 | 6581 Smad3         |
| ENSMUSG00000055670 | 6582 Zzef1         |
| ENSMUSG00000002496 | 6583 Tsc2          |
| ENSMUSG00000060152 | 6584 Pop5          |
| ENSMUSG00000074607 | 6585 Tox2          |
| ENSMUSG00000089726 | 6586 Mir17hg       |
| ENSMUSG00000038206 | 6587 Fbxo8         |
| ENSMUSG00000001507 | 6588 Itga3         |
| ENSMUSG00000054051 | 6589 Ercc6         |
| ENSMUSG00000020205 | 6590 Phlda1        |
| ENSMUSG00000069793 | 6591 Slfn9         |
| ENSMUSG00000037610 | 6592 Kcnmb2        |

|                    |                    |
|--------------------|--------------------|
| ENSMUSG00000028975 | 6593 Pex14         |
| ENSMUSG00000026482 | 6594 Rgl1          |
| ENSMUSG00000046341 | 6595 Gm11223       |
| ENSMUSG00000059323 | 6596 Tonsl         |
| ENSMUSG00000019986 | 6597 Ahi1          |
| ENSMUSG00000042185 | 6598 Nfrkb         |
| ENSMUSG00000020986 | 6599 Sec23a        |
| ENSMUSG00000035954 | 6600 Dock4         |
| ENSMUSG00000020832 | 6601 Eral1         |
| ENSMUSG00000068115 | 6602 Ninl          |
| ENSMUSG00000021007 | 6603 Spata7        |
| ENSMUSG00000042182 | 6604 Bend6         |
| ENSMUSG00000046785 | 6605 Epm2aip1      |
| ENSMUSG00000032422 | 6606 Snx14         |
| ENSMUSG00000038807 | 6607 Rap1gap2      |
| ENSMUSG00000025373 | 6608 Rnf41         |
| ENSMUSG00000039683 | 6609 Sdk1          |
| ENSMUSG00000039704 | 6610 Lmbrd2        |
| ENSMUSG00000024424 | 6611 Ttc39c        |
| ENSMUSG00000038648 | 6612 Creb3l2       |
| ENSMUSG00000023104 | 6613 Rfc2          |
| ENSMUSG00000035397 | 6614 Klf16         |
| ENSMUSG00000031383 | 6615 Dusp9         |
| ENSMUSG00000026037 | 6616 Orc2          |
| ENSMUSG00000032540 | 6617 Abhd5         |
| ENSMUSG00000026930 | 6618 Gpsm1         |
| ENSMUSG00000026035 | 6619 Ppil3         |
| ENSMUSG00000041775 | 6620 Mapk1ip1      |
| ENSMUSG00000039182 | 6621 AW209491      |
| ENSMUSG00000086629 | 6622 2810403D21Rik |
| ENSMUSG00000004934 | 6623 Pias4         |
| ENSMUSG00000038866 | 6624 Zcchc2        |
| ENSMUSG00000006307 | 6625 Kmt2b         |
| ENSMUSG00000033819 | 6626 Ppp1r16a      |
| ENSMUSG00000017146 | 6627 Brca1         |
| ENSMUSG00000052310 | 6628 Slc39a1       |
| ENSMUSG00000008090 | 6629 Fgfrl1        |
| ENSMUSG00000026639 | 6630 Lamb3         |
| ENSMUSG00000039382 | 6631 Wdr45         |
| ENSMUSG00000040037 | 6632 Negr1         |
| ENSMUSG00000028082 | 6633 Sh3d19        |
| ENSMUSG00000028673 | 6634 Fuca1         |

|                     |                    |
|---------------------|--------------------|
| ENSMUSG00000034731  | 6635 Dgkh          |
| ENSMUSG00000099706  | 6636 Gm29536       |
| ENSMUSG00000052962  | 6637 Mrpl35        |
| ENSMUSG00000042104  | 6638 Ugg2          |
| ENSMUSG00000040734  | 6639 Ppp1r13l      |
| ENSMUSG00000031214  | 6640 Ophn1         |
| ENSMUSG00000026773  | 6641 Pfkfb3        |
| ENSMUSG00000038024  | 6642 Dennd4c       |
| ENSMUSG00000037990  | 6643 Sh3rf3        |
| ENSMUSG00000086915  | 6644 Gm16365       |
| ENSMUSG00000024524  | 6645 Gnal          |
| ENSMUSG00000035764  | 6646 Fbxo45        |
| ENSMUSG00000042680  | 6647 Garem         |
| ENSMUSG00000032085  | 6648 Tagln         |
| ENSMUSG00000040410  | 6649 Fbxl4         |
| ENSMUSG000000100335 | 6650 2310008N11Rik |
| ENSMUSG00000009905  | 6651 Kdsr          |
| ENSMUSG000000100345 | 6652 Gm29418       |
| ENSMUSG00000021608  | 6653 Lpcat1        |
| ENSMUSG00000030231  | 6654 Plekha5       |
| ENSMUSG00000020802  | 6655 Ube2o         |
| ENSMUSG00000035357  | 6656 Pdzn3         |
| ENSMUSG00000002580  | 6657 Mien1         |
| ENSMUSG00000035948  | 6658 Acss3         |
| ENSMUSG00000029545  | 6659 Acads         |
| ENSMUSG00000027678  | 6660 Ncoa3         |
| ENSMUSG00000005534  | 6661 Insr          |
| ENSMUSG00000022253  | 6662 Nadk2         |
| ENSMUSG00000099061  | 6663 Gm28050       |
| ENSMUSG00000058672  | 6664 Tubb2a        |
| ENSMUSG00000034292  | 6665 Traf3ip1      |
| ENSMUSG00000029502  | 6666 Golga3        |
| ENSMUSG00000030104  | 6667 Edem1         |
| ENSMUSG00000022554  | 6668 Hgh1          |
| ENSMUSG00000040822  | 6669 1700123O20Rik |
| ENSMUSG00000025932  | 6670 Eya1          |
| ENSMUSG00000081049  | 6671 Rps24-ps3     |
| ENSMUSG00000022636  | 6672 Alcam         |
| ENSMUSG00000079553  | 6673 Kifc1         |
| ENSMUSG00000030259  | 6674 Rassf8        |
| ENSMUSG00000027428  | 6675 Rbbp9         |
| ENSMUSG00000027677  | 6676 Ttc14         |

|                     |                    |
|---------------------|--------------------|
| ENSMUSG00000039678  | 6677 Tbc1d13       |
| ENSMUSG00000051674  | 6678 Dcun1d4       |
| ENSMUSG00000033053  | 6679 1700028P14Rik |
| ENSMUSG00000041530  | 6680 Ago1          |
| ENSMUSG00000026525  | 6681 Opn3          |
| ENSMUSG00000097553  | 6682 4930455D15Rik |
| ENSMUSG00000022820  | 6683 Ndufb4        |
| ENSMUSG00000040111  | 6684 Gramd1b       |
| ENSMUSG00000058927  | 6685 Gm10053       |
| ENSMUSG00000024197  | 6686 Plin3         |
| ENSMUSG00000053286  | 6687 Trmt1l        |
| ENSMUSG00000073647  | 6688 Gm10557       |
| ENSMUSG00000015812  | 6689 Gnrh1         |
| ENSMUSG00000029924  | 6690 Slc37a3       |
| ENSMUSG00000048490  | 6691 Nrip1         |
| ENSMUSG00000022523  | 6692 Fgf12         |
| ENSMUSG00000062825  | 6693 Actg1         |
| ENSMUSG00000002983  | 6694 Relb          |
| ENSMUSG000000102286 | 6695 Gm37004       |
| ENSMUSG00000026088  | 6696 Mitd1         |
| ENSMUSG00000039990  | 6697 Edrf1         |
| ENSMUSG00000032786  | 6698 Alas1         |
| ENSMUSG00000046562  | 6699 Unc119b       |
| ENSMUSG00000045205  | 6700 Dpy19l4       |
| ENSMUSG00000035413  | 6701 Tmem98        |
| ENSMUSG00000037415  | 6702 Ranbp10       |
| ENSMUSG00000025026  | 6703 Add3          |
| ENSMUSG00000033773  | 6704 Rpap2         |
| ENSMUSG000000106741 | 6705 4930513D17Rik |
| ENSMUSG00000087203  | 6706 Gm13986       |
| ENSMUSG00000065954  | 6707 Tacc1         |
| ENSMUSG00000028690  | 6708 Mmachc        |
| ENSMUSG00000048520  | 6709 Fbxl13        |
| ENSMUSG00000075467  | 6710 Dnlz          |
| ENSMUSG00000022760  | 6711 Thap7         |
| ENSMUSG00000064037  | 6712 Gpn1          |
| ENSMUSG00000032290  | 6713 Ptpn9         |
| ENSMUSG00000069089  | 6714 Cdk7          |
| ENSMUSG00000019143  | 6715 Hars2         |
| ENSMUSG00000050989  | 6716 Sepn1         |
| ENSMUSG00000050697  | 6717 Prkaa1        |
| ENSMUSG00000099703  | 6718 Gm28285       |



|                    |                    |
|--------------------|--------------------|
| ENSMUSG00000028318 | 6719 Polr1e        |
| ENSMUSG00000107799 | 6720 RP23-265P8.3  |
| ENSMUSG00000047215 | 6721 Rpl9          |
| ENSMUSG00000020375 | 6722 Rufy1         |
| ENSMUSG00000034295 | 6723 Fhod3         |
| ENSMUSG00000040236 | 6724 Trappc5       |
| ENSMUSG00000024862 | 6725 Klc2          |
| ENSMUSG00000029104 | 6726 Htt           |
| ENSMUSG00000032501 | 6727 Trib1         |
| ENSMUSG00000053483 | 6728 Usp21         |
| ENSMUSG00000025757 | 6729 Hspa4l        |
| ENSMUSG00000079480 | 6730 Pin4          |
| ENSMUSG00000027695 | 6731 Pld1          |
| ENSMUSG00000056608 | 6732 Chd9          |
| ENSMUSG00000097048 | 6733 1600020E01Rik |
| ENSMUSG00000027007 | 6734 Ssfa2         |
| ENSMUSG00000026048 | 6735 Ercc5         |
| ENSMUSG00000038876 | 6736 Rnf146        |
| ENSMUSG00000022106 | 6737 Rcbtb2        |
| ENSMUSG00000050846 | 6738 Zfp623        |
| ENSMUSG00000035293 | 6739 G2e3          |
| ENSMUSG00000028030 | 6740 Tbck          |
| ENSMUSG00000027281 | 6741 Slx4ip        |
| ENSMUSG00000009545 | 6742 Kcnq1         |
| ENSMUSG00000038168 | 6743 P3h2          |
| ENSMUSG00000087231 | 6744 E230016M11Rik |
| ENSMUSG00000048878 | 6745 Hexim1        |
| ENSMUSG00000022517 | 6746 Mgrn1         |
| ENSMUSG00000021411 | 6747 Pxdc1         |
| ENSMUSG00000034709 | 6748 Ppp1r21       |
| ENSMUSG00000045969 | 6749 Ing1          |
| ENSMUSG00000018449 | 6750 Rpain         |
| ENSMUSG00000027427 | 6751 Polr3f        |
| ENSMUSG00000054115 | 6752 Skp2          |
| ENSMUSG00000039717 | 6753 Ralyl         |
| ENSMUSG00000025870 | 6754 Arl10         |
| ENSMUSG00000036061 | 6755 Smug1         |
| ENSMUSG00000034557 | 6756 Zfyve9        |
| ENSMUSG00000029521 | 6757 Chek2         |
| ENSMUSG00000053950 | 6758 Adnp2         |
| ENSMUSG00000033684 | 6759 Qsox1         |
| ENSMUSG00000035311 | 6760 Gnptab        |

|                    |                    |
|--------------------|--------------------|
| ENSMUSG00000021918 | 6761 Nek4          |
| ENSMUSG00000103855 | 6762 Gm37605       |
| ENSMUSG00000024137 | 6763 E4f1          |
| ENSMUSG00000024891 | 6764 Slc29a2       |
| ENSMUSG00000048310 | 6765 Pskh1         |
| ENSMUSG00000036534 | 6766 Slc38a7       |
| ENSMUSG00000037523 | 6767 Mavs          |
| ENSMUSG00000027475 | 6768 Kif3b         |
| ENSMUSG00000040112 | 6769 Mrps35        |
| ENSMUSG00000019897 | 6770 Ccdc59        |
| ENSMUSG00000024253 | 6771 Dync2li1      |
| ENSMUSG00000045409 | 6772 Trim39        |
| ENSMUSG00000014232 | 6773 Cluap1        |
| ENSMUSG00000047084 | 6774 Ngrn          |
| ENSMUSG00000032396 | 6775 Dis3l         |
| ENSMUSG00000031133 | 6776 Arhgef6       |
| ENSMUSG00000033016 | 6777 Nfatc1        |
| ENSMUSG00000062270 | 6778 Morf4l1       |
| ENSMUSG00000075000 | 6779 Nrbf2         |
| ENSMUSG00000091474 | 6780 2610021A01Rik |
| ENSMUSG00000084757 | 6781 1700057H15Rik |
| ENSMUSG00000063172 | 6782 Hspb11        |
| ENSMUSG00000053774 | 6783 Ubxn7         |
| ENSMUSG00000015214 | 6784 Mtmr1         |
| ENSMUSG00000020027 | 6785 Socs2         |
| ENSMUSG00000072407 | 6786 Gm6419        |
| ENSMUSG00000055128 | 6787 Cgrrf1        |
| ENSMUSG00000020525 | 6788 Ppm1d         |
| ENSMUSG00000022790 | 6789 Igsf11        |
| ENSMUSG00000061455 | 6790 Stx17         |
| ENSMUSG00000028641 | 6791 P3h1          |
| ENSMUSG00000083678 | 6792 Gm12989       |
| ENSMUSG00000051235 | 6793 Gen1          |
| ENSMUSG00000020628 | 6794 Trappc12      |
| ENSMUSG00000029003 | 6795 Mad2l2        |
| ENSMUSG00000024665 | 6796 Fads2         |
| ENSMUSG00000073987 | 6797 Ggh           |
| ENSMUSG00000050315 | 6798 Synpo2        |
| ENSMUSG00000023921 | 6799 Mut           |
| ENSMUSG00000022216 | 6800 Psme1         |
| ENSMUSG00000038214 | 6801 Bend3         |
| ENSMUSG00000014353 | 6802 Tmem87b       |

|                    |               |
|--------------------|---------------|
| ENSMUSG00000025135 | 6803 Anapc11  |
| ENSMUSG00000035735 | 6804 Dagla    |
| ENSMUSG00000070420 | 6805 Zscan25  |
| ENSMUSG00000029416 | 6806 Slc15a4  |
| ENSMUSG00000022442 | 6807 Ttll1    |
| ENSMUSG00000024457 | 6808 Trim26   |
| ENSMUSG00000050945 | 6809 Zfp438   |
| ENSMUSG00000039737 | 6810 Prkrip1  |
| ENSMUSG00000060216 | 6811 Arrb2    |
| ENSMUSG00000025277 | 6812 Abhd6    |
| ENSMUSG00000038860 | 6813 Garnl3   |
| ENSMUSG00000032398 | 6814 Snapc5   |
| ENSMUSG00000031174 | 6815 Rpgr     |
| ENSMUSG00000021690 | 6816 Jmy      |
| ENSMUSG00000020230 | 6817 Prmt2    |
| ENSMUSG00000042870 | 6818 Tom1     |
| ENSMUSG00000028245 | 6819 Nsmaf    |
| ENSMUSG00000038538 | 6820 Ubn2     |
| ENSMUSG00000034912 | 6821 Mdga2    |
| ENSMUSG00000040767 | 6822 Snrnp25  |
| ENSMUSG00000049516 | 6823 Spty2d1  |
| ENSMUSG00000020263 | 6824 Appl2    |
| ENSMUSG00000059363 | 6825 Fxn      |
| ENSMUSG00000009112 | 6826 Bcl2l13  |
| ENSMUSG00000025962 | 6827 Fastkd2  |
| ENSMUSG00000048078 | 6828 Tenm4    |
| ENSMUSG00000005682 | 6829 Pan2     |
| ENSMUSG00000046909 | 6830 Tefm     |
| ENSMUSG00000024529 | 6831 Lox      |
| ENSMUSG00000001555 | 6832 Fkbp10   |
| ENSMUSG00000028013 | 6833 Ppa2     |
| ENSMUSG00000035824 | 6834 Tk2      |
| ENSMUSG00000045896 | 6835 Paip2b   |
| ENSMUSG00000027589 | 6836 Pcmt2d2  |
| ENSMUSG00000062901 | 6837 Klhl24   |
| ENSMUSG00000042826 | 6838 Fgf11    |
| ENSMUSG00000032519 | 6839 Slc25a38 |
| ENSMUSG00000071679 | 6840 Zcchc16  |
| ENSMUSG00000027010 | 6841 Slc25a12 |
| ENSMUSG00000030638 | 6842 Sh3gl3   |
| ENSMUSG00000003378 | 6843 Grik5    |
| ENSMUSG00000041935 | 6844 AW549877 |

|                     |                    |
|---------------------|--------------------|
| ENSMUSG00000068101  | 6845 Cenpm         |
| ENSMUSG00000020919  | 6846 Stat5b        |
| ENSMUSG00000022412  | 6847 Mief1         |
| ENSMUSG00000030881  | 6848 Arfip2        |
| ENSMUSG00000038010  | 6849 Ccdc138       |
| ENSMUSG00000038156  | 6850 Spon1         |
| ENSMUSG00000038072  | 6851 Galnt11       |
| ENSMUSG00000038383  | 6852 Pigu          |
| ENSMUSG00000041624  | 6853 Gucy1a2       |
| ENSMUSG00000044303  | 6854 Cdkn2a        |
| ENSMUSG00000021281  | 6855 Tnfaip2       |
| ENSMUSG00000055943  | 6856 Emc7          |
| ENSMUSG00000039356  | 6857 Exosc2        |
| ENSMUSG00000003541  | 6858 Ier3          |
| ENSMUSG00000027628  | 6859 Aar2          |
| ENSMUSG00000022175  | 6860 Lrp10         |
| ENSMUSG00000025184  | 6861 R3hcc1l       |
| ENSMUSG00000035595  | 6862 1600002K03Rik |
| ENSMUSG00000022841  | 6863 Ap2m1         |
| ENSMUSG00000035969  | 6864 Rusc2         |
| ENSMUSG00000086254  | 6865 3100003L05Rik |
| ENSMUSG00000039477  | 6866 Tnrc18        |
| ENSMUSG00000019787  | 6867 Trdn          |
| ENSMUSG00000036450  | 6868 Hif1an        |
| ENSMUSG00000027883  | 6869 Gpsm2         |
| ENSMUSG00000033569  | 6870 Adgrb3        |
| ENSMUSG00000068732  | 6871 Tmem167b      |
| ENSMUSG00000031168  | 6872 Ebp           |
| ENSMUSG00000021668  | 6873 Polk          |
| ENSMUSG00000019577  | 6874 Pdk4          |
| ENSMUSG00000038150  | 6875 Ormdl3        |
| ENSMUSG00000063889  | 6876 Crem          |
| ENSMUSG00000036820  | 6877 Amdhd2        |
| ENSMUSG00000046727  | 6878 Cystm1        |
| ENSMUSG000000107985 | 6879 RP23-449F12.9 |
| ENSMUSG00000029563  | 6880 Foxp2         |
| ENSMUSG00000056427  | 6881 Slit3         |
| ENSMUSG00000020248  | 6882 Nfyb          |
| ENSMUSG00000028007  | 6883 Snx7          |
| ENSMUSG00000031349  | 6884 Nsdhl         |
| ENSMUSG00000087002  | 6885 Gm16277       |
| ENSMUSG00000019790  | 6886 Stxbp5        |

|                    |                    |
|--------------------|--------------------|
| ENSMUSG00000016637 | 6887 Ift27         |
| ENSMUSG00000086887 | 6888 1700060C16Rik |
| ENSMUSG00000029918 | 6889 Mrps33        |
| ENSMUSG00000003032 | 6890 Klf4          |
| ENSMUSG00000021671 | 6891 Poc5          |
| ENSMUSG00000022964 | 6892 Tmem50b       |
| ENSMUSG00000032352 | 6893 Lrrc1         |
| ENSMUSG00000040653 | 6894 Ppp1r14c      |
| ENSMUSG00000023861 | 6895 Mpc1          |
| ENSMUSG00000038280 | 6896 Ostm1         |
| ENSMUSG00000022864 | 6897 D16Ertd472e   |
| ENSMUSG00000047409 | 6898 Ctdspl        |
| ENSMUSG00000034342 | 6899 Cbl           |
| ENSMUSG00000055493 | 6900 Epm2a         |
| ENSMUSG00000020023 | 6901 Tmcc3         |
| ENSMUSG00000029513 | 6902 Prkab1        |
| ENSMUSG00000030780 | 6903 BC017158      |
| ENSMUSG00000035011 | 6904 Zbtb7a        |
| ENSMUSG00000037568 | 6905 Vash2         |
| ENSMUSG00000036197 | 6906 Gxylt1        |
| ENSMUSG00000005897 | 6907 Nr2c1         |
| ENSMUSG00000043051 | 6908 Disc1         |
| ENSMUSG00000020482 | 6909 Ccdc117       |
| ENSMUSG00000026627 | 6910 Tmem206       |
| ENSMUSG00000075227 | 6911 Znhit2        |
| ENSMUSG00000034334 | 6912 Fam151b       |
| ENSMUSG00000070699 | 6913 Sars2         |
| ENSMUSG00000027865 | 6914 Gdap2         |
| ENSMUSG00000054477 | 6915 Kcnn2         |
| ENSMUSG00000039713 | 6916 Plekhg5       |
| ENSMUSG00000052374 | 6917 Actn2         |
| ENSMUSG00000037772 | 6918 Mrpl23        |
| ENSMUSG00000034310 | 6919 Tmem132d      |
| ENSMUSG00000019841 | 6920 Rev3l         |
| ENSMUSG00000099968 | 6921 1700029J03Rik |
| ENSMUSG00000036980 | 6922 Taf6          |
| ENSMUSG00000056124 | 6923 B4galt6       |
| ENSMUSG00000039239 | 6924 Tgfb2         |
| ENSMUSG00000029683 | 6925 Lmod2         |
| ENSMUSG00000037270 | 6926 4932438A13Rik |
| ENSMUSG00000046318 | 6927 Ccbe1         |
| ENSMUSG00000087043 | 6928 Gm13599       |

|                    |                     |
|--------------------|---------------------|
| ENSMUSG00000020190 | 6929 Mknk2          |
| ENSMUSG00000013275 | 6930 Slc41a1        |
| ENSMUSG00000039058 | 6931 Ak5            |
| ENSMUSG00000036046 | 6932 5031439G07Rik  |
| ENSMUSG00000004040 | 6933 Stat3          |
| ENSMUSG00000000934 | 6934 Top1mt         |
| ENSMUSG00000023805 | 6935 Synj2          |
| ENSMUSG00000098257 | 6936 Gm27169        |
| ENSMUSG00000019948 | 6937 Actr6          |
| ENSMUSG00000031103 | 6938 Elf4           |
| ENSMUSG00000038286 | 6939 Bphl           |
| ENSMUSG00000040472 | 6940 Rabggta        |
| ENSMUSG00000025264 | 6941 Tsr2           |
| ENSMUSG00000032872 | 6942 Cyb5r4         |
| ENSMUSG00000022601 | 6943 Zbtb11         |
| ENSMUSG00000028901 | 6944 Gmeb1          |
| ENSMUSG00000021003 | 6945 Galc           |
| ENSMUSG00000051469 | 6946 Zfp191         |
| ENSMUSG00000026782 | 6947 Abi2           |
| ENSMUSG00000092187 | 6948 Gm20457        |
| ENSMUSG00000038115 | 6949 Ano2           |
| ENSMUSG00000049969 | 6950 Plekhf2        |
| ENSMUSG00000053253 | 6951 Ndfip2         |
| ENSMUSG00000014554 | 6952 Dguok          |
| ENSMUSG00000001288 | 6953 Rarg           |
| ENSMUSG00000004798 | 6954 Ulk2           |
| ENSMUSG00000026687 | 6955 Aldh9a1        |
| ENSMUSG00000014245 | 6956 Pigl           |
| ENSMUSG00000036644 | 6957 Tbc1d9b        |
| ENSMUSG00000026637 | 6958 Traf5          |
| ENSMUSG00000071302 | 6959 2610044O15Rik8 |
| ENSMUSG00000046111 | 6960 Cep295         |
| ENSMUSG00000016344 | 6961 Pdpf           |
| ENSMUSG00000025059 | 6962 Gk             |
| ENSMUSG00000021704 | 6963 Mtx3           |
| ENSMUSG00000010607 | 6964 Pigyl          |
| ENSMUSG00000041229 | 6965 Phf8           |
| ENSMUSG00000058290 | 6966 Espl1          |
| ENSMUSG00000063439 | 6967 B9d2           |
| ENSMUSG00000040423 | 6968 Rc3h1          |
| ENSMUSG00000031467 | 6969 Agpat5         |
| ENSMUSG00000016494 | 6970 Cd34           |

|                    |                    |
|--------------------|--------------------|
| ENSMUSG00000052419 | 6971 2610001J05Rik |
| ENSMUSG00000027326 | 6972 Casc5         |
| ENSMUSG00000051048 | 6973 P4ha3         |
| ENSMUSG00000025722 | 6974 Wdr73         |
| ENSMUSG00000028949 | 6975 Smarcd3       |
| ENSMUSG00000046731 | 6976 Kctd11        |
| ENSMUSG00000042677 | 6977 Zc3h12a       |
| ENSMUSG00000067656 | 6978 Slc22a27      |
| ENSMUSG00000000149 | 6979 Gna12         |
| ENSMUSG00000038520 | 6980 Tbc1d17       |
| ENSMUSG00000021408 | 6981 Ripk1         |
| ENSMUSG00000009418 | 6982 Nav1          |
| ENSMUSG00000021684 | 6983 Pde8b         |
| ENSMUSG00000046152 | 6984 Fut10         |
| ENSMUSG00000031458 | 6985 Coprs         |
| ENSMUSG00000098243 | 6986 Gm4258        |
| ENSMUSG00000022674 | 6987 Ube2v2        |
| ENSMUSG00000025465 | 6988 Echs1         |
| ENSMUSG00000023026 | 6989 Dip2b         |
| ENSMUSG00000031072 | 6990 Oraov1        |
| ENSMUSG00000100969 | 6991 1700030N03Rik |
| ENSMUSG00000022861 | 6992 Dgkg          |
| ENSMUSG00000002897 | 6993 Il17ra        |
| ENSMUSG00000059182 | 6994 Skap2         |
| ENSMUSG00000015804 | 6995 Med28         |
| ENSMUSG00000037544 | 6996 Dlgap5        |
| ENSMUSG00000021706 | 6997 Zfyve16       |
| ENSMUSG00000002205 | 6998 Vrk3          |
| ENSMUSG00000040234 | 6999 Tm7sf3        |
| ENSMUSG00000027710 | 7000 Acad9         |
| ENSMUSG00000041674 | 7001 BC006965      |
| ENSMUSG00000028680 | 7002 Plk3          |
| ENSMUSG00000035873 | 7003 Pawr          |
| ENSMUSG00000032006 | 7004 Pdgfd         |
| ENSMUSG00000037938 | 7005 Chchd5        |
| ENSMUSG00000080006 | 7006 Rps19-ps7     |
| ENSMUSG00000031583 | 7007 Wrn           |
| ENSMUSG00000057706 | 7008 Mex3b         |
| ENSMUSG00000027286 | 7009 Lrrc57        |
| ENSMUSG00000027380 | 7010 Acox1         |
| ENSMUSG00000092465 | 7011 Gm20472       |
| ENSMUSG00000073684 | 7012 Faap20        |

|                    |                    |
|--------------------|--------------------|
| ENSMUSG00000102106 | 7013 2310043O21Rik |
| ENSMUSG00000051341 | 7014 Zfp52         |
| ENSMUSG00000028246 | 7015 Faxc          |
| ENSMUSG00000097648 | 7016 9330185C12Rik |
| ENSMUSG00000029482 | 7017 Aacs          |
| ENSMUSG00000024042 | 7018 Sik1          |
| ENSMUSG00000036533 | 7019 Cdc42ep3      |
| ENSMUSG00000027263 | 7020 Tubgcp4       |
| ENSMUSG00000038895 | 7021 Zfp653        |
| ENSMUSG00000038332 | 7022 Sesn1         |
| ENSMUSG00000079011 | 7023 Gm11033       |
| ENSMUSG00000025645 | 7024 Ccdc51        |
| ENSMUSG00000017286 | 7025 Glod4         |
| ENSMUSG00000018372 | 7026 Cep95         |
| ENSMUSG00000039706 | 7027 Ldb2          |
| ENSMUSG00000022386 | 7028 Trmu          |
| ENSMUSG00000041341 | 7029 Atg2b         |
| ENSMUSG00000026664 | 7030 Phyh          |
| ENSMUSG00000002308 | 7031 Cd320         |
| ENSMUSG00000025156 | 7032 Gps1          |
| ENSMUSG00000083533 | 7033 Gm13450       |
| ENSMUSG00000039089 | 7034 L3mbtl3       |
| ENSMUSG00000037652 | 7035 Phc3          |
| ENSMUSG00000025076 | 7036 Casp7         |
| ENSMUSG00000044751 | 7037 Gm12231       |
| ENSMUSG00000033855 | 7038 Ston1         |
| ENSMUSG00000053062 | 7039 Jam2          |
| ENSMUSG00000026470 | 7040 Stx6          |
| ENSMUSG00000028403 | 7041 Zdhhc21       |
| ENSMUSG00000034501 | 7042 Pcnxl4        |
| ENSMUSG00000055912 | 7043 Tmem150a      |
| ENSMUSG00000028863 | 7044 Meaf6         |
| ENSMUSG00000050931 | 7045 Sgms2         |
| ENSMUSG00000015289 | 7046 Lage3         |
| ENSMUSG00000002083 | 7047 Bbc3          |
| ENSMUSG00000029213 | 7048 Commd8        |
| ENSMUSG00000022434 | 7049 Fam118a       |
| ENSMUSG00000005397 | 7050 Nid1          |
| ENSMUSG00000000305 | 7051 Cdh4          |
| ENSMUSG00000060771 | 7052 Tsga10        |
| ENSMUSG00000019864 | 7053 Rtn4ip1       |
| ENSMUSG00000101253 | 7054 Gm29088       |



|                     |                    |
|---------------------|--------------------|
| ENSMUSG00000052331  | 7055 Ankrd44       |
| ENSMUSG00000025608  | 7056 Podxl         |
| ENSMUSG00000030177  | 7057 Ccdc77        |
| ENSMUSG000000096958 | 7058 Gm26573       |
| ENSMUSG00000027692  | 7059 Tnik          |
| ENSMUSG00000019467  | 7060 Arhgef25      |
| ENSMUSG00000074582  | 7061 Arfgef2       |
| ENSMUSG00000015711  | 7062 Prune         |
| ENSMUSG00000034940  | 7063 Synrg         |
| ENSMUSG00000021932  | 7064 Rnaseh2b      |
| ENSMUSG00000020282  | 7065 Rhbdf1        |
| ENSMUSG00000061330  | 7066 Gm11361       |
| ENSMUSG00000021967  | 7067 Mrpl57        |
| ENSMUSG00000030091  | 7068 Nup210        |
| ENSMUSG000000097219 | 7069 Gm26551       |
| ENSMUSG00000034620  | 7070 Tmem5         |
| ENSMUSG00000021013  | 7071 Ttc8          |
| ENSMUSG00000042271  | 7072 Nxt2          |
| ENSMUSG00000039254  | 7073 Pomt1         |
| ENSMUSG00000063808  | 7074 Gpatch1       |
| ENSMUSG00000086370  | 7075 Ftx           |
| ENSMUSG00000036873  | 7076 2410004B18Rik |
| ENSMUSG00000038250  | 7077 Usp38         |
| ENSMUSG00000020801  | 7078 Med31         |
| ENSMUSG00000086541  | 7079 Has2os        |
| ENSMUSG00000042408  | 7080 Zmym6         |
| ENSMUSG00000017756  | 7081 Slc12a7       |
| ENSMUSG00000021140  | 7082 Pcnx          |
| ENSMUSG00000031851  | 7083 Ntpcr         |
| ENSMUSG00000015305  | 7084 Sash1         |
| ENSMUSG00000083012  | 7085 Fam220a       |
| ENSMUSG00000034647  | 7086 Ankrd12       |
| ENSMUSG00000037570  | 7087 Mcrs1         |
| ENSMUSG00000073131  | 7088 Vma21         |
| ENSMUSG00000085998  | 7089 AW822252      |
| ENSMUSG00000039929  | 7090 Urb1          |
| ENSMUSG00000004996  | 7091 Mri1          |
| ENSMUSG00000044792  | 7092 Isca1         |
| ENSMUSG00000001755  | 7093 Coasy         |
| ENSMUSG00000062713  | 7094 Sim2          |
| ENSMUSG00000043456  | 7095 Zfp536        |
| ENSMUSG00000037885  | 7096 Stk35         |

|                     |                    |
|---------------------|--------------------|
| ENSMUSG00000042312  | 7097 S100a13       |
| ENSMUSG00000105891  | 7098 A230001M10Rik |
| ENSMUSG00000021285  | 7099 Ppp1r13b      |
| ENSMUSG000000049252 | 7100 Lrp1b         |
| ENSMUSG00000038976  | 7101 Ppp1r9b       |
| ENSMUSG00000000194  | 7102 Gpr107        |
| ENSMUSG000000025584 | 7103 Pde8a         |
| ENSMUSG00000031959  | 7104 Wdr59         |
| ENSMUSG00000037386  | 7105 Rims2         |
| ENSMUSG00000032855  | 7106 Pkd1          |
| ENSMUSG00000057134  | 7107 Ado           |
| ENSMUSG00000097785  | 7108 B230217O12Rik |
| ENSMUSG00000034762  | 7109 Glis1         |
| ENSMUSG00000026427  | 7110 Eif2d         |
| ENSMUSG00000022769  | 7111 Sdf2l1        |
| ENSMUSG00000001098  | 7112 Kctd10        |
| ENSMUSG00000029616  | 7113 Erp29         |
| ENSMUSG00000061119  | 7114 Prcp          |
| ENSMUSG00000101968  | 7115 1700027A15Rik |
| ENSMUSG00000027635  | 7116 Dsn1          |
| ENSMUSG00000057110  | 7117 Cntrl         |
| ENSMUSG00000073792  | 7118 Alg6          |
| ENSMUSG00000029661  | 7119 Col1a2        |
| ENSMUSG00000101895  | 7120 Gm28981       |
| ENSMUSG00000013833  | 7121 Med16         |
| ENSMUSG00000017801  | 7122 Mlx           |
| ENSMUSG00000059195  | 7123 Gm12715       |
| ENSMUSG00000031604  | 7124 Msmo1         |
| ENSMUSG00000019979  | 7125 Apaf1         |
| ENSMUSG00000001435  | 7126 Col18a1       |
| ENSMUSG00000035150  | 7127 Eif2s3x       |
| ENSMUSG00000040877  | 7128 Wdr25         |
| ENSMUSG00000024548  | 7129 Setbp1        |
| ENSMUSG00000024299  | 7130 Adamts10      |
| ENSMUSG00000025142  | 7131 Aspscr1       |
| ENSMUSG00000034098  | 7132 Fstl5         |
| ENSMUSG00000028540  | 7133 Dph2          |
| ENSMUSG00000103659  | 7134 Gm32569       |
| ENSMUSG00000028184  | 7135 Adgrl2        |
| ENSMUSG00000042419  | 7136 Nfkbil1       |
| ENSMUSG00000030641  | 7137 Ddias         |
| ENSMUSG00000103620  | 7138 Gm37359       |

|                    |                |
|--------------------|----------------|
| ENSMUSG00000022516 | 7139 Nudt16l1  |
| ENSMUSG00000000976 | 7140 Heatr6    |
| ENSMUSG00000083567 | 7141 Gm11451   |
| ENSMUSG00000063412 | 7142 Gm10131   |
| ENSMUSG00000035842 | 7143 Ddx11     |
| ENSMUSG00000031171 | 7144 Ftsj1     |
| ENSMUSG00000034126 | 7145 Pomt2     |
| ENSMUSG00000015745 | 7146 Plekho1   |
| ENSMUSG00000090290 | 7147 Gm17296   |
| ENSMUSG00000083093 | 7148 Gm15385   |
| ENSMUSG00000030717 | 7149 Nupr1     |
| ENSMUSG00000049670 | 7150 Morn4     |
| ENSMUSG00000013622 | 7151 Atraid    |
| ENSMUSG00000097589 | 7152 Dleu2     |
| ENSMUSG00000015981 | 7153 Stk32c    |
| ENSMUSG00000040123 | 7154 Zmym5     |
| ENSMUSG00000042439 | 7155 Zfp532    |
| ENSMUSG00000049624 | 7156 Slc17a5   |
| ENSMUSG00000027244 | 7157 Atg13     |
| ENSMUSG00000032527 | 7158 Pccb      |
| ENSMUSG00000083344 | 7159 Gm7363    |
| ENSMUSG00000037426 | 7160 Depdc5    |
| ENSMUSG00000040964 | 7161 Arhgef10l |
| ENSMUSG00000055485 | 7162 Soga1     |
| ENSMUSG00000074925 | 7163 Ptar1     |
| ENSMUSG00000031740 | 7164 Mmp2      |
| ENSMUSG00000000711 | 7165 Rab5b     |
| ENSMUSG00000029471 | 7166 Camkk2    |
| ENSMUSG00000034487 | 7167 Kdelc2    |
| ENSMUSG00000025937 | 7168 Lactb2    |
| ENSMUSG00000016503 | 7169 Gtf3a     |
| ENSMUSG00000067835 | 7170 Gm14661   |
| ENSMUSG00000056459 | 7171 Zbtb25    |
| ENSMUSG00000057914 | 7172 Cacnb2    |
| ENSMUSG00000099895 | 7173 Gm28153   |
| ENSMUSG00000034329 | 7174 Brip1     |
| ENSMUSG00000019039 | 7175 Dalrd3    |
| ENSMUSG00000040219 | 7176 Ttc12     |
| ENSMUSG00000038256 | 7177 Bcl9      |
| ENSMUSG00000068391 | 7178 Chrac1    |
| ENSMUSG00000021662 | 7179 Arhgef28  |
| ENSMUSG00000057375 | 7180 Yipf1     |

|                     |                    |
|---------------------|--------------------|
| ENSMUSG00000014980  | 7181 Tsen15        |
| ENSMUSG00000038602  | 7182 Slc35f1       |
| ENSMUSG00000038039  | 7183 Gcc2          |
| ENSMUSG00000075415  | 7184 Fnbp1         |
| ENSMUSG00000079197  | 7185 Psme2         |
| ENSMUSG00000037624  | 7186 Kcnk2         |
| ENSMUSG00000041915  | 7187 Ammecr1l      |
| ENSMUSG00000029910  | 7188 Mad2l1        |
| ENSMUSG00000053007  | 7189 Creb5         |
| ENSMUSG00000021371  | 7190 Mcur1         |
| ENSMUSG00000028550  | 7191 Atg4c         |
| ENSMUSG00000002814  | 7192 Top3a         |
| ENSMUSG00000020589  | 7193 Fam49a        |
| ENSMUSG00000092368  | 7194 A930015D03Rik |
| ENSMUSG00000032192  | 7195 Gnb5          |
| ENSMUSG00000030677  | 7196 Kif22         |
| ENSMUSG00000063972  | 7197 Nr6a1         |
| ENSMUSG00000097725  | 7198 4930593A02Rik |
| ENSMUSG00000033059  | 7199 Pygb          |
| ENSMUSG00000063281  | 7200 Zfp35         |
| ENSMUSG00000040287  | 7201 Stac3         |
| ENSMUSG000000108799 | 7202 RP24-178G20.2 |
| ENSMUSG00000018541  | 7203 Cwc25         |
| ENSMUSG000000100826 | 7204 Snhg14        |
| ENSMUSG00000031631  | 7205 Cfap97        |
| ENSMUSG00000015363  | 7206 Trabd         |
| ENSMUSG00000035284  | 7207 Vps13c        |
| ENSMUSG00000020697  | 7208 Lig3          |
| ENSMUSG00000090247  | 7209 Bloc1s1       |
| ENSMUSG00000058756  | 7210 Thra          |
| ENSMUSG00000060166  | 7211 Zdhhc8        |
| ENSMUSG00000031107  | 7212 Rbmx2         |
| ENSMUSG00000034157  | 7213 Cipc          |
| ENSMUSG00000024959  | 7214 Bad           |
| ENSMUSG00000030284  | 7215 Creld1        |
| ENSMUSG00000056018  | 7216 Ccdc7b        |
| ENSMUSG00000036036  | 7217 Zfp57         |
| ENSMUSG00000039176  | 7218 Polg          |
| ENSMUSG00000025558  | 7219 Dock9         |
| ENSMUSG00000029092  | 7220 D5Ertd615e    |
| ENSMUSG00000063849  | 7221 Ppcdc         |
| ENSMUSG00000027346  | 7222 Gpcpd1        |

|                     |                    |
|---------------------|--------------------|
| ENSMUSG00000025140  | 7223 Pycr1         |
| ENSMUSG00000094113  | 7224 5430401F13Rik |
| ENSMUSG00000040586  | 7225 Ofd1          |
| ENSMUSG00000071654  | 7226 Uqcc3         |
| ENSMUSG00000048007  | 7227 Timm8a1       |
| ENSMUSG00000022912  | 7228 Pros1         |
| ENSMUSG00000057672  | 7229 Pkn1          |
| ENSMUSG00000003662  | 7230 Ciao1         |
| ENSMUSG00000050379  | 7231 6-Sep         |
| ENSMUSG00000025159  | 7232 Mms19         |
| ENSMUSG00000047497  | 7233 Adamts12      |
| ENSMUSG00000062352  | 7234 Itgb1bp1      |
| ENSMUSG00000048154  | 7235 Kmt2d         |
| ENSMUSG00000028093  | 7236 Acp6          |
| ENSMUSG00000063445  | 7237 Nmral1        |
| ENSMUSG00000029190  | 7238 D5Ertd579e    |
| ENSMUSG00000045039  | 7239 Megf8         |
| ENSMUSG00000028899  | 7240 Taf12         |
| ENSMUSG00000060467  | 7241 Gm10080       |
| ENSMUSG00000046768  | 7242 Rhoj          |
| ENSMUSG00000020781  | 7243 Tsen54        |
| ENSMUSG00000029711  | 7244 Epo           |
| ENSMUSG00000038481  | 7245 Cdk19         |
| ENSMUSG00000020231  | 7246 Dip2a         |
| ENSMUSG000000102252 | 7247 Snrpn         |
| ENSMUSG00000008307  | 7248 1700109H08Rik |
| ENSMUSG00000044201  | 7249 Cdc25c        |
| ENSMUSG00000020876  | 7250 Snx11         |
| ENSMUSG00000027394  | 7251 Ttl           |
| ENSMUSG00000035864  | 7252 Syt1          |
| ENSMUSG00000060012  | 7253 Kif13b        |
| ENSMUSG00000041258  | 7254 Zfp236        |
| ENSMUSG00000020546  | 7255 Stxbp4        |
| ENSMUSG00000002307  | 7256 Daxx          |
| ENSMUSG00000022629  | 7257 Kif21a        |
| ENSMUSG00000085940  | 7258 4930405D11Rik |
| ENSMUSG00000045555  | 7259 Mettl24       |
| ENSMUSG00000028607  | 7260 Cpt2          |
| ENSMUSG00000021022  | 7261 Ppp2r3c       |
| ENSMUSG00000053641  | 7262 Dennd4a       |
| ENSMUSG00000001656  | 7263 Hoxc11        |
| ENSMUSG00000029270  | 7264 Fam69a        |

|                     |               |
|---------------------|---------------|
| ENSMUSG00000026283  | 7265 Ing5     |
| ENSMUSG00000071369  | 7266 Map3k5   |
| ENSMUSG00000041471  | 7267 Fam35a   |
| ENSMUSG00000031570  | 7268 Ppapdc1b |
| ENSMUSG00000029060  | 7269 Mib2     |
| ENSMUSG00000047888  | 7270 Tnrc6b   |
| ENSMUSG00000001663  | 7271 Gstt1    |
| ENSMUSG00000031730  | 7272 Dhodh    |
| ENSMUSG00000018500  | 7273 Adora2b  |
| ENSMUSG00000049744  | 7274 Arhgap15 |
| ENSMUSG00000018574  | 7275 Acadvl   |
| ENSMUSG000000107230 | 7276 Gm19265  |
| ENSMUSG00000035495  | 7277 Tstd2    |
| ENSMUSG00000025495  | 7278 Ptdss2   |
| ENSMUSG00000029406  | 7279 Pitpnm2  |
| ENSMUSG00000037138  | 7280 Aff3     |
| ENSMUSG00000038080  | 7281 Kdm1b    |
| ENSMUSG00000004054  | 7282 Map3k11  |
| ENSMUSG00000002329  | 7283 Mdp1     |
| ENSMUSG00000028278  | 7284 Rragd    |
| ENSMUSG00000001039  | 7285 B9d1     |
| ENSMUSG00000024906  | 7286 Mus81    |
| ENSMUSG00000026121  | 7287 Sema4c   |
| ENSMUSG00000025808  | 7288 Ccdc7a   |
| ENSMUSG00000092035  | 7289 Peg10    |
| ENSMUSG00000025265  | 7290 Fgd1     |
| ENSMUSG00000034023  | 7291 Fancd2   |
| ENSMUSG00000036966  | 7292 Spryd3   |
| ENSMUSG00000041417  | 7293 Pik3r1   |
| ENSMUSG00000040594  | 7294 Ranbp17  |
| ENSMUSG00000037536  | 7295 Fbxo34   |
| ENSMUSG00000026511  | 7296 Srp9     |
| ENSMUSG00000029591  | 7297 Ung      |
| ENSMUSG00000033610  | 7298 Pank1    |
| ENSMUSG00000008730  | 7299 Hipk1    |
| ENSMUSG00000046605  | 7300 B3gntl1  |
| ENSMUSG00000024851  | 7301 Pitpnm1  |
| ENSMUSG00000034509  | 7302 Mad2l1bp |
| ENSMUSG00000060924  | 7303 Csmc1    |
| ENSMUSG00000027999  | 7304 Pla2g12a |
| ENSMUSG00000057963  | 7305 Itpk1    |
| ENSMUSG00000038155  | 7306 Gstp2    |

|                     |                    |
|---------------------|--------------------|
| ENSMUSG00000020273  | 7307 Papolg        |
| ENSMUSG00000032373  | 7308 Car12         |
| ENSMUSG00000020220  | 7309 Vps13d        |
| ENSMUSG000000086249 | 7310 Gm12724       |
| ENSMUSG00000044149  | 7311 Nkrf          |
| ENSMUSG00000045210  | 7312 Vcpip1        |
| ENSMUSG00000036086  | 7313 Zranb3        |
| ENSMUSG00000074529  | 7314 C330013J21Rik |
| ENSMUSG00000026519  | 7315 Tmem63a       |
| ENSMUSG00000022359  | 7316 Wdyhv1        |
| ENSMUSG00000030269  | 7317 Mtmr14        |
| ENSMUSG00000033554  | 7318 Dph5          |
| ENSMUSG00000023262  | 7319 Acy1          |
| ENSMUSG00000035266  | 7320 Helq          |
| ENSMUSG00000005621  | 7321 Zfp592        |
| ENSMUSG000000050910 | 7322 Cdr2l         |
| ENSMUSG00000074555  | 7323 Gm10714       |
| ENSMUSG00000044876  | 7324 Zfp444        |
| ENSMUSG00000024642  | 7325 Tle4          |
| ENSMUSG00000056493  | 7326 Foxk1         |
| ENSMUSG00000021417  | 7327 Eci2          |
| ENSMUSG00000027255  | 7328 Arfgap2       |
| ENSMUSG00000025255  | 7329 Zfhx4         |
| ENSMUSG00000010047  | 7330 Hyal2         |
| ENSMUSG00000018476  | 7331 Kdm6b         |
| ENSMUSG00000036264  | 7332 Fstl4         |
| ENSMUSG00000015709  | 7333 Arnt2         |
| ENSMUSG00000036218  | 7334 Pdzrn4        |
| ENSMUSG00000021423  | 7335 Ly86          |
| ENSMUSG00000061461  | 7336 Smim20        |
| ENSMUSG00000021189  | 7337 Atxn3         |
| ENSMUSG00000026492  | 7338 Tfb2m         |
| ENSMUSG00000054414  | 7339 Slc30a7       |
| ENSMUSG00000028655  | 7340 Mfsd2a        |
| ENSMUSG00000053519  | 7341 Kcnip1        |
| ENSMUSG00000024055  | 7342 Cyp4f13       |
| ENSMUSG00000029922  | 7343 Mkrn1         |
| ENSMUSG00000009828  | 7344 Ick           |
| ENSMUSG00000066595  | 7345 Mfsd7b        |
| ENSMUSG00000062866  | 7346 Phactr2       |
| ENSMUSG00000018401  | 7347 Mtmr4         |
| ENSMUSG00000020812  | 7348 1810032O08Rik |

|                     |               |
|---------------------|---------------|
| ENSMUSG00000020521  | 7349 Rnft1    |
| ENSMUSG00000017291  | 7350 Taok1    |
| ENSMUSG00000003208  | 7351 Ccdc94   |
| ENSMUSG000000101214 | 7352 Gm28403  |
| ENSMUSG00000021703  | 7353 Serinc5  |
| ENSMUSG00000004455  | 7354 Ppp1cc   |
| ENSMUSG000000045679 | 7355 Pqlc3    |
| ENSMUSG00000022550  | 7356 Adck5    |
| ENSMUSG00000042367  | 7357 Gjb3     |
| ENSMUSG00000043909  | 7358 Trp53bp1 |
| ENSMUSG00000028488  | 7359 Sh3gl2   |
| ENSMUSG00000049755  | 7360 Zfp672   |
| ENSMUSG00000041153  | 7361 Osgin2   |
| ENSMUSG00000029814  | 7362 Igf2bp3  |
| ENSMUSG00000055900  | 7363 Tmem69   |
| ENSMUSG00000002031  | 7364 Ift46    |
| ENSMUSG00000029804  | 7365 Herc3    |
| ENSMUSG00000027646  | 7366 Src      |
| ENSMUSG00000022801  | 7367 Lrch3    |
| ENSMUSG00000039246  | 7368 Lyplal1  |
| ENSMUSG00000035517  | 7369 Tdrd7    |
| ENSMUSG00000034748  | 7370 Sirt6    |
| ENSMUSG00000033790  | 7371 Tubgcp5  |
| ENSMUSG00000040811  | 7372 Eml2     |
| ENSMUSG00000000275  | 7373 Trim25   |
| ENSMUSG00000033009  | 7374 Ogfod1   |
| ENSMUSG00000060206  | 7375 Zfp462   |
| ENSMUSG000000089655 | 7376 Gm16004  |
| ENSMUSG00000022687  | 7377 Boc      |
| ENSMUSG00000025038  | 7378 Efhc2    |
| ENSMUSG00000024413  | 7379 Npc1     |
| ENSMUSG00000058748  | 7380 Zfp958   |
| ENSMUSG00000053644  | 7381 Aldh7a1  |
| ENSMUSG00000034473  | 7382 Sec22a   |
| ENSMUSG00000036721  | 7383 Zscan12  |
| ENSMUSG00000036718  | 7384 Micall2  |
| ENSMUSG00000024667  | 7385 Tmem216  |
| ENSMUSG00000023912  | 7386 Slc25a27 |
| ENSMUSG00000040943  | 7387 Tet2     |
| ENSMUSG000000099647 | 7388 Gm5776   |
| ENSMUSG00000045102  | 7389 Poln     |
| ENSMUSG00000049411  | 7390 Tmem241  |



|                    |                    |
|--------------------|--------------------|
| ENSMUSG00000021376 | 7391 Tpm1          |
| ENSMUSG00000035900 | 7392 Gramd4        |
| ENSMUSG00000074452 | 7393 Pate2         |
| ENSMUSG00000016128 | 7394 Stard13       |
| ENSMUSG00000021720 | 7395 Rnf180        |
| ENSMUSG00000027086 | 7396 Fastkd1       |
| ENSMUSG00000043391 | 7397 2510009E07Rik |
| ENSMUSG00000048100 | 7398 Taf13         |
| ENSMUSG00000016918 | 7399 Sulf1         |
| ENSMUSG00000042082 | 7400 Arsb          |
| ENSMUSG00000059493 | 7401 Nhs           |
| ENSMUSG00000038342 | 7402 Mlxip         |
| ENSMUSG00000097911 | 7403 Gm26691       |
| ENSMUSG00000036986 | 7404 Pml           |
| ENSMUSG00000030272 | 7405 Camk1         |
| ENSMUSG00000051483 | 7406 Cbr1          |
| ENSMUSG00000024306 | 7407 Ccdc178       |
| ENSMUSG00000044066 | 7408 Cep68         |
| ENSMUSG00000057181 | 7409 5730455P16Rik |
| ENSMUSG00000006360 | 7410 Crip1         |
| ENSMUSG00000000340 | 7411 Dbt           |
| ENSMUSG00000038002 | 7412 Cramp1l       |
| ENSMUSG00000027209 | 7413 Fam227b       |
| ENSMUSG00000024942 | 7414 Capn1         |
| ENSMUSG00000032410 | 7415 Xrn1          |
| ENSMUSG00000037972 | 7416 Snn           |
| ENSMUSG00000021879 | 7417 Dnah12        |
| ENSMUSG00000035067 | 7418 Xkr6          |
| ENSMUSG00000054814 | 7419 Usp46         |
| ENSMUSG00000003746 | 7420 Man1a         |
| ENSMUSG00000041837 | 7421 Pdcd7         |
| ENSMUSG00000085783 | 7422 Gm9816        |
| ENSMUSG00000026694 | 7423 Mettl13       |
| ENSMUSG00000022436 | 7424 Sh3bp1        |
| ENSMUSG00000033669 | 7425 Zfp7          |
| ENSMUSG00000024892 | 7426 Pcx           |
| ENSMUSG00000028718 | 7427 Stil          |
| ENSMUSG00000058298 | 7428 Mcm9          |
| ENSMUSG00000017550 | 7429 Atad5         |
| ENSMUSG00000019945 | 7430 1700040L02Rik |
| ENSMUSG00000072872 | 7431 Rybp          |
| ENSMUSG00000001768 | 7432 Rin2          |

|                    |                    |
|--------------------|--------------------|
| ENSMUSG00000087194 | 7433 Skint6        |
| ENSMUSG00000015647 | 7434 Lama5         |
| ENSMUSG00000024807 | 7435 Syvn1         |
| ENSMUSG00000004631 | 7436 Sgce          |
| ENSMUSG00000048109 | 7437 Rbm15         |
| ENSMUSG00000024658 | 7438 Gm9750        |
| ENSMUSG00000066643 | 7439 Wdr35         |
| ENSMUSG00000038542 | 7440 Pcid2         |
| ENSMUSG00000042046 | 7441 Dstyk         |
| ENSMUSG00000022833 | 7442 Ccdc14        |
| ENSMUSG00000097040 | 7443 2610316D01Rik |
| ENSMUSG00000046791 | 7444 2410016O06Rik |
| ENSMUSG00000056260 | 7445 Lrif1         |
| ENSMUSG00000029233 | 7446 Srd5a3        |
| ENSMUSG00000024797 | 7447 Vps51         |
| ENSMUSG00000024201 | 7448 Kdm4b         |
| ENSMUSG00000076431 | 7449 Sox4          |
| ENSMUSG00000021712 | 7450 Trim23        |
| ENSMUSG00000022366 | 7451 Slc22a22      |
| ENSMUSG00000042111 | 7452 Ccdc115       |
| ENSMUSG00000038872 | 7453 Zfhx3         |
| ENSMUSG00000049680 | 7454 Urgcp         |
| ENSMUSG00000030271 | 7455 Ogg1          |
| ENSMUSG00000031158 | 7456 Timm17b       |
| ENSMUSG00000006527 | 7457 Sfmbt1        |
| ENSMUSG00000043259 | 7458 Fam13c        |
| ENSMUSG00000039809 | 7459 Gabbr2        |
| ENSMUSG00000034773 | 7460 BC030867      |
| ENSMUSG00000050732 | 7461 Vamp8         |
| ENSMUSG00000021219 | 7462 Rgs6          |
| ENSMUSG00000038712 | 7463 Fam63a        |
| ENSMUSG00000039660 | 7464 D2Wsu81e      |
| ENSMUSG00000042567 | 7465 Nek10         |
| ENSMUSG00000021366 | 7466 Hivep1        |
| ENSMUSG00000022552 | 7467 Sharpin       |
| ENSMUSG00000062931 | 7468 Zfp938        |
| ENSMUSG00000029346 | 7469 Srrd          |
| ENSMUSG00000014418 | 7470 Hps5          |
| ENSMUSG00000081355 | 7471 Gm15264       |
| ENSMUSG00000086877 | 7472 A230072C01Rik |
| ENSMUSG00000054342 | 7473 Kcnn4         |
| ENSMUSG00000026107 | 7474 Nabp1         |

|                    |               |
|--------------------|---------------|
| ENSMUSG00000023066 | 7475 Rttm     |
| ENSMUSG00000001151 | 7476 Pcnt     |
| ENSMUSG00000048787 | 7477 Dcun1d3  |
| ENSMUSG00000030869 | 7478 Ndufab1  |
| ENSMUSG00000026641 | 7479 Usf1     |
| ENSMUSG00000048755 | 7480 Mcat     |
| ENSMUSG00000049336 | 7481 Tenm2    |
| ENSMUSG00000101880 | 7482 Gm29282  |
| ENSMUSG00000002043 | 7483 Trappc6a |
| ENSMUSG00000075600 | 7484 Zc3h3    |
| ENSMUSG00000024427 | 7485 Spry4    |
| ENSMUSG00000025484 | 7486 Bet1l    |
| ENSMUSG00000035601 | 7487 Trmt10b  |
| ENSMUSG00000040749 | 7488 Siah1b   |
| ENSMUSG00000061666 | 7489 Gdpd1    |
| ENSMUSG00000059895 | 7490 Ptp4a3   |
| ENSMUSG00000029433 | 7491 Diablo   |
| ENSMUSG00000078789 | 7492 Dph1     |
| ENSMUSG00000054150 | 7493 Syne3    |
| ENSMUSG00000021235 | 7494 Coq6     |
| ENSMUSG00000039062 | 7495 Anpep    |
| ENSMUSG00000021830 | 7496 Txndc16  |
| ENSMUSG00000035365 | 7497 Parpbp   |
| ENSMUSG00000039069 | 7498 Mtg2     |
| ENSMUSG00000025855 | 7499 Prkar1b  |
| ENSMUSG00000083895 | 7500 Gm12074  |
| ENSMUSG00000035877 | 7501 Zhx3     |
| ENSMUSG00000024274 | 7502 Zscan30  |
| ENSMUSG00000038122 | 7503 Tbc1d32  |
| ENSMUSG00000020400 | 7504 Tnip1    |
| ENSMUSG00000032387 | 7505 Rbpms2   |
| ENSMUSG00000025612 | 7506 Bach1    |
| ENSMUSG00000099190 | 7507 Gm27188  |
| ENSMUSG00000055228 | 7508 Zfp935   |
| ENSMUSG00000071984 | 7509 Fndc1    |
| ENSMUSG00000034832 | 7510 Tet3     |
| ENSMUSG00000047261 | 7511 Gap43    |
| ENSMUSG00000031728 | 7512 Zfp821   |
| ENSMUSG00000009681 | 7513 Bcr      |
| ENSMUSG00000028702 | 7514 Rad54l   |
| ENSMUSG00000029504 | 7515 Ddx51    |
| ENSMUSG00000026988 | 7516 Wdsub1   |

|                     |                    |
|---------------------|--------------------|
| ENSMUSG00000027274  | 7517 Mkks          |
| ENSMUSG00000048546  | 7518 Tob2          |
| ENSMUSG00000019295  | 7519 Tmem129       |
| ENSMUSG00000039131  | 7520 Gipc2         |
| ENSMUSG00000009995  | 7521 Taz           |
| ENSMUSG00000020283  | 7522 Pex13         |
| ENSMUSG00000031220  | 7523 Awat2         |
| ENSMUSG00000010067  | 7524 Rassf1        |
| ENSMUSG00000025956  | 7525 Mettl21a      |
| ENSMUSG00000040389  | 7526 Wdr47         |
| ENSMUSG00000034601  | 7527 2700049A03Rik |
| ENSMUSG00000024109  | 7528 Nrxa1         |
| ENSMUSG00000024845  | 7529 Tmem134       |
| ENSMUSG00000026019  | 7530 Wdr12         |
| ENSMUSG00000035642  | 7531 Aamdc         |
| ENSMUSG00000024064  | 7532 Galnt14       |
| ENSMUSG00000036513  | 7533 Commd2        |
| ENSMUSG000000104785 | 7534 Gm31121       |
| ENSMUSG00000042632  | 7535 Pla2g6        |
| ENSMUSG00000026956  | 7536 Uap1l1        |
| ENSMUSG00000031596  | 7537 Slc7a2        |
| ENSMUSG00000087361  | 7538 0610043K17Rik |
| ENSMUSG00000018849  | 7539 Wwc1          |
| ENSMUSG00000033256  | 7540 Shf           |
| ENSMUSG00000042557  | 7541 Sin3a         |
| ENSMUSG00000063434  | 7542 Sorcs3        |
| ENSMUSG00000005804  | 7543 Bloc1s6       |
| ENSMUSG00000026211  | 7544 Obsl1         |
| ENSMUSG00000024787  | 7545 Snx15         |
| ENSMUSG00000097640  | 7546 Gm20033       |
| ENSMUSG00000045996  | 7547 Polr2k        |
| ENSMUSG00000055296  | 7548 Tmem245       |
| ENSMUSG00000048379  | 7549 Socs4         |
| ENSMUSG00000006019  | 7550 Dhx34         |
| ENSMUSG00000053460  | 7551 Ggcx          |
| ENSMUSG00000047514  | 7552 Tspyl1        |
| ENSMUSG00000071176  | 7553 Arhgef10      |
| ENSMUSG00000029710  | 7554 Ephb4         |
| ENSMUSG00000033356  | 7555 Pus7l         |
| ENSMUSG00000021614  | 7556 Vcan          |
| ENSMUSG00000030826  | 7557 Bcat2         |
| ENSMUSG00000038331  | 7558 Satb2         |

|                     |                    |
|---------------------|--------------------|
| ENSMUSG00000018167  | 7559 Stard3        |
| ENSMUSG00000106053  | 7560 Gm20752       |
| ENSMUSG00000025271  | 7561 Pfkfb1        |
| ENSMUSG00000074405  | 7562 Zfp865        |
| ENSMUSG00000043923  | 7563 Ccdc84        |
| ENSMUSG00000007207  | 7564 Stx1a         |
| ENSMUSG000000097166 | 7565 9330179D12Rik |
| ENSMUSG00000066809  | 7566 Gm10180       |
| ENSMUSG00000019055  | 7567 Plod1         |
| ENSMUSG00000020105  | 7568 Lrig3         |
| ENSMUSG00000028799  | 7569 Zfp362        |
| ENSMUSG00000074916  | 7570 Chst14        |
| ENSMUSG00000035863  | 7571 Palm          |
| ENSMUSG00000052656  | 7572 Rnf103        |
| ENSMUSG00000021779  | 7573 Thrb          |
| ENSMUSG00000033396  | 7574 Spg11         |
| ENSMUSG00000038582  | 7575 Pptc7         |
| ENSMUSG00000057409  | 7576 Zfp53         |
| ENSMUSG00000024170  | 7577 Telo2         |
| ENSMUSG00000028878  | 7578 Fam76a        |
| ENSMUSG00000047014  | 7579 Catsperb      |
| ENSMUSG00000026779  | 7580 Mastl         |
| ENSMUSG00000084938  | 7581 BB557941      |
| ENSMUSG00000031434  | 7582 Morc4         |
| ENSMUSG00000041241  | 7583 Mul1          |
| ENSMUSG00000034297  | 7584 Med13         |
| ENSMUSG00000054400  | 7585 Cklf          |
| ENSMUSG00000005615  | 7586 Pcyt1a        |
| ENSMUSG00000026807  | 7587 Ak8           |
| ENSMUSG00000031714  | 7588 Gab1          |
| ENSMUSG00000025701  | 7589 Alox5         |
| ENSMUSG00000024472  | 7590 Dcp2          |
| ENSMUSG00000024174  | 7591 Pot1b         |
| ENSMUSG00000037905  | 7592 Bri3bp        |
| ENSMUSG00000036832  | 7593 Lpar3         |
| ENSMUSG00000059897  | 7594 Zfp930        |
| ENSMUSG00000026384  | 7595 Ptpn4         |
| ENSMUSG00000108449  | 7596 RP23-143J24.4 |
| ENSMUSG00000090206  | 7597 Tepp          |
| ENSMUSG00000023938  | 7598 Aars2         |
| ENSMUSG00000030689  | 7599 Ino80e        |
| ENSMUSG00000032727  | 7600 Mier3         |

|                     |                    |
|---------------------|--------------------|
| ENSMUSG00000038828  | 7601 Tmem214       |
| ENSMUSG00000039367  | 7602 Sec24c        |
| ENSMUSG00000050705  | 7603 2310061I04Rik |
| ENSMUSG00000036273  | 7604 Lrrk2         |
| ENSMUSG00000056919  | 7605 Cep162        |
| ENSMUSG00000037636  | 7606 Slc25a43      |
| ENSMUSG00000099902  | 7607 Gm12115       |
| ENSMUSG00000023143  | 7608 Nagpa         |
| ENSMUSG00000031105  | 7609 Slc25a14      |
| ENSMUSG00000027242  | 7610 Wdr76         |
| ENSMUSG00000052609  | 7611 Plekhg3       |
| ENSMUSG00000025571  | 7612 Tnrc6c        |
| ENSMUSG00000072592  | 7613 Gm10373       |
| ENSMUSG00000036845  | 7614 Lin37         |
| ENSMUSG00000027531  | 7615 Impa1         |
| ENSMUSG00000034898  | 7616 Filip1        |
| ENSMUSG00000032898  | 7617 Fbxo21        |
| ENSMUSG00000022309  | 7618 Angpt1        |
| ENSMUSG00000028068  | 7619 Iqgap3        |
| ENSMUSG00000021747  | 7620 4930452B06Rik |
| ENSMUSG00000085234  | 7621 Gm15614       |
| ENSMUSG00000069806  | 7622 Cacng7        |
| ENSMUSG00000029571  | 7623 Tmem106b      |
| ENSMUSG00000090704  | 7624 Trp53-ps      |
| ENSMUSG00000015053  | 7625 Gata2         |
| ENSMUSG00000060743  | 7626 H3f3a         |
| ENSMUSG00000020604  | 7627 Arsg          |
| ENSMUSG000000105239 | 7628 Gm43091       |
| ENSMUSG00000081752  | 7629 Gm14680       |
| ENSMUSG00000075327  | 7630 Zbtb2         |
| ENSMUSG00000040040  | 7631 Ift88         |
| ENSMUSG00000029559  | 7632 2210016L21Rik |
| ENSMUSG00000026154  | 7633 Sdhaf4        |
| ENSMUSG00000039414  | 7634 Heatr5b       |
| ENSMUSG00000086029  | 7635 Pax6os1       |
| ENSMUSG000000107283 | 7636 Mpv17         |
| ENSMUSG00000018347  | 7637 Zkscan6       |
| ENSMUSG00000061778  | 7638 Mospd2        |
| ENSMUSG00000002266  | 7639 Zim1          |
| ENSMUSG00000074794  | 7640 Arrdc3        |
| ENSMUSG00000039840  | 7641 Epg5          |
| ENSMUSG00000034312  | 7642 Iqsec1        |

|                    |                    |
|--------------------|--------------------|
| ENSMUSG00000037017 | 7643 Zscan21       |
| ENSMUSG00000032594 | 7644 Ip6k1         |
| ENSMUSG00000032172 | 7645 Olfm2         |
| ENSMUSG00000019158 | 7646 Tmem160       |
| ENSMUSG00000047371 | 7647 Zfp768        |
| ENSMUSG00000032289 | 7648 Thsd4         |
| ENSMUSG00000028885 | 7649 Smpdl3b       |
| ENSMUSG00000042515 | 7650 Mum1l1        |
| ENSMUSG00000040396 | 7651 Abhd13        |
| ENSMUSG00000040711 | 7652 Sh3pxd2b      |
| ENSMUSG00000038508 | 7653 Gdf15         |
| ENSMUSG00000071267 | 7654 Zfp942        |
| ENSMUSG00000012017 | 7655 Scarf2        |
| ENSMUSG00000098794 | 7656 Gm28038       |
| ENSMUSG00000035045 | 7657 Zc3h12b       |
| ENSMUSG00000024534 | 7658 Sncaip        |
| ENSMUSG00000028438 | 7659 Kif24         |
| ENSMUSG00000029512 | 7660 Ulk1          |
| ENSMUSG00000072964 | 7661 Bhlhb9        |
| ENSMUSG00000039512 | 7662 Uhrf1bp1      |
| ENSMUSG00000028466 | 7663 Creb3         |
| ENSMUSG00000016831 | 7664 Tox4          |
| ENSMUSG00000040124 | 7665 Gorab         |
| ENSMUSG00000054836 | 7666 Elp6          |
| ENSMUSG00000042473 | 7667 Tbc1d8b       |
| ENSMUSG00000045410 | 7668 Akr1e1        |
| ENSMUSG00000046808 | 7669 Atp10d        |
| ENSMUSG00000042569 | 7670 Dhrr7b        |
| ENSMUSG00000090126 | 7671 4930519F09Rik |
| ENSMUSG00000042063 | 7672 Zfp386        |
| ENSMUSG00000081769 | 7673 Gm12216       |
| ENSMUSG00000062312 | 7674 Erbb2         |
| ENSMUSG00000041143 | 7675 Tmco4         |
| ENSMUSG00000032705 | 7676 Exd2          |
| ENSMUSG00000034460 | 7677 Six4          |
| ENSMUSG00000041353 | 7678 Tmem29        |
| ENSMUSG00000021906 | 7679 Oxnad1        |
| ENSMUSG00000036013 | 7680 Fam122c       |
| ENSMUSG00000026209 | 7681 Dnpep         |
| ENSMUSG00000037325 | 7682 Bbs7          |
| ENSMUSG00000053754 | 7683 Chd8          |
| ENSMUSG00000000957 | 7684 Mmp14         |

|                     |                    |
|---------------------|--------------------|
| ENSMUSG00000019539  | 7685 Rcn3          |
| ENSMUSG00000048930  | 7686 Tada3         |
| ENSMUSG00000035125  | 7687 Gcfc2         |
| ENSMUSG00000045257  | 7688 Morn2         |
| ENSMUSG00000093772  | 7689 4931403E22Rik |
| ENSMUSG00000037525  | 7690 Bcdin3d       |
| ENSMUSG00000031209  | 7691 Heph          |
| ENSMUSG00000030643  | 7692 Rab30         |
| ENSMUSG00000061474  | 7693 Mrps36        |
| ENSMUSG00000032308  | 7694 Ulk3          |
| ENSMUSG00000062190  | 7695 Lancl2        |
| ENSMUSG00000052479  | 7696 A330008L17Rik |
| ENSMUSG00000034981  | 7697 Parm1         |
| ENSMUSG00000036106  | 7698 Prr5          |
| ENSMUSG00000017897  | 7699 Eya2          |
| ENSMUSG00000027329  | 7700 Spef1         |
| ENSMUSG00000026527  | 7701 Rgs7          |
| ENSMUSG00000026765  | 7702 Lypd6b        |
| ENSMUSG00000098172  | 7703 Gm26973       |
| ENSMUSG00000024187  | 7704 Fam234a       |
| ENSMUSG00000023022  | 7705 Lima1         |
| ENSMUSG00000031949  | 7706 Adat1         |
| ENSMUSG00000050144  | 7707 Slc25a44      |
| ENSMUSG00000041710  | 7708 Trpc5         |
| ENSMUSG00000056214  | 7709 Pard6g        |
| ENSMUSG00000015335  | 7710 Zdhhc12       |
| ENSMUSG00000030917  | 7711 Tmem159       |
| ENSMUSG00000060961  | 7712 Slc4a4        |
| ENSMUSG00000020329  | 7713 Polrmt        |
| ENSMUSG00000029173  | 7714 Sepsecs       |
| ENSMUSG00000021040  | 7715 Slirp         |
| ENSMUSG00000037408  | 7716 Cnnm4         |
| ENSMUSG00000051527  | 7717 Usp29         |
| ENSMUSG000000106854 | 7718 Gm42850       |
| ENSMUSG000000105355 | 7719 Gm42956       |
| ENSMUSG000000103305 | 7720 Gm34068       |
| ENSMUSG00000041890  | 7721 Git2          |
| ENSMUSG00000029389  | 7722 Ddx55         |
| ENSMUSG00000031618  | 7723 Nr3c2         |
| ENSMUSG00000027353  | 7724 Mcm8          |
| ENSMUSG00000039232  | 7725 Stx11         |
| ENSMUSG00000053194  | 7726 Cib4          |



|                     |                    |
|---------------------|--------------------|
| ENSMUSG00000038646  | 7727 Fam103a1      |
| ENSMUSG00000038022  | 7728 Fam188b       |
| ENSMUSG00000036528  | 7729 Ppfibp2       |
| ENSMUSG00000027994  | 7730 Ccdc109b      |
| ENSMUSG00000025505  | 7731 Tmem80        |
| ENSMUSG00000029016  | 7732 Clcn6         |
| ENSMUSG00000071856  | 7733 Mcc           |
| ENSMUSG00000086204  | 7734 Gm15668       |
| ENSMUSG00000039903  | 7735 Eva1c         |
| ENSMUSG00000023147  | 7736 Wrb           |
| ENSMUSG00000052485  | 7737 Tmem171       |
| ENSMUSG00000025950  | 7738 Idh1          |
| ENSMUSG00000024516  | 7739 Sec11c        |
| ENSMUSG00000032355  | 7740 Mlip          |
| ENSMUSG00000044986  | 7741 Tst           |
| ENSMUSG000000107747 | 7742 RP24-322F4.3  |
| ENSMUSG00000022048  | 7743 Dpysl2        |
| ENSMUSG00000074867  | 7744 Zfp808        |
| ENSMUSG00000042644  | 7745 Itpr3         |
| ENSMUSG00000041684  | 7746 Bivm          |
| ENSMUSG00000047721  | 7747 Bola2         |
| ENSMUSG00000036377  | 7748 C530008M17Rik |
| ENSMUSG00000022610  | 7749 Mapk12        |
| ENSMUSG00000018196  | 7750 Glrx2         |
| ENSMUSG00000021583  | 7751 Erap1         |
| ENSMUSG00000048486  | 7752 Fitm2         |
| ENSMUSG00000051950  | 7753 B3glct        |
| ENSMUSG00000026172  | 7754 Bcs1l         |
| ENSMUSG00000020886  | 7755 Dlg4          |
| ENSMUSG00000038485  | 7756 Socs7         |
| ENSMUSG00000029469  | 7757 Ift81         |
| ENSMUSG00000007610  | 7758 Gtpbp3        |
| ENSMUSG00000087400  | 7759 Gm15270       |
| ENSMUSG00000018800  | 7760 Abca5         |
| ENSMUSG00000039738  | 7761 Slx4          |
| ENSMUSG00000006763  | 7762 Saal1         |
| ENSMUSG00000026858  | 7763 Fam73b        |
| ENSMUSG00000030335  | 7764 Mrpl51        |
| ENSMUSG00000025915  | 7765 Sgk3          |
| ENSMUSG00000020212  | 7766 Mdm1          |
| ENSMUSG00000038059  | 7767 Smim3         |
| ENSMUSG00000032009  | 7768 Sesn3         |

|                     |                    |
|---------------------|--------------------|
| ENSMUSG00000025409  | 7769 Mbd6          |
| ENSMUSG00000097516  | 7770 4930467D21Rik |
| ENSMUSG00000022749  | 7771 Tbc1d23       |
| ENSMUSG00000031988  | 7772 Vps26b        |
| ENSMUSG00000018040  | 7773 Rrp7a         |
| ENSMUSG00000046519  | 7774 Golph3l       |
| ENSMUSG00000047250  | 7775 Ptgs1         |
| ENSMUSG00000001700  | 7776 Gramd3        |
| ENSMUSG00000074465  | 7777 Gm10701       |
| ENSMUSG00000025959  | 7778 Klf7          |
| ENSMUSG00000029725  | 7779 Ppp1r35       |
| ENSMUSG00000027963  | 7780 Extl2         |
| ENSMUSG00000005362  | 7781 Crbn          |
| ENSMUSG00000040430  | 7782 Pitpnc1       |
| ENSMUSG00000020137  | 7783 Thap2         |
| ENSMUSG00000022485  | 7784 Hoxc5         |
| ENSMUSG00000033904  | 7785 Ccp110        |
| ENSMUSG00000043300  | 7786 B3galnt1      |
| ENSMUSG00000066037  | 7787 Hnrnpr        |
| ENSMUSG00000036918  | 7788 Ttc7          |
| ENSMUSG00000066900  | 7789 Suds3         |
| ENSMUSG00000040482  | 7790 Dxo           |
| ENSMUSG00000015968  | 7791 Cacna1d       |
| ENSMUSG00000027985  | 7792 Lef1          |
| ENSMUSG00000040390  | 7793 Map3k10       |
| ENSMUSG00000085965  | 7794 2310016D23Rik |
| ENSMUSG00000040339  | 7795 Fam102b       |
| ENSMUSG00000097682  | 7796 4930554H23Rik |
| ENSMUSG00000020818  | 7797 Mfsd11        |
| ENSMUSG00000085157  | 7798 4930515L19Rik |
| ENSMUSG00000080811  | 7799 Gm14513       |
| ENSMUSG00000053141  | 7800 Ptprt         |
| ENSMUSG00000031787  | 7801 Katnb1        |
| ENSMUSG00000031667  | 7802 Aktip         |
| ENSMUSG00000003062  | 7803 Stard3nl      |
| ENSMUSG00000023087  | 7804 Noct          |
| ENSMUSG00000040147  | 7805 Maob          |
| ENSMUSG00000006920  | 7806 Ezh1          |
| ENSMUSG00000022428  | 7807 Cby1          |
| ENSMUSG000000102450 | 7808 Gm38343       |
| ENSMUSG00000053604  | 7809 Rpia          |
| ENSMUSG00000039294  | 7810 BC017643      |

|                    |                    |
|--------------------|--------------------|
| ENSMUSG00000022935 | 7811 Grik1         |
| ENSMUSG00000032232 | 7812 Cgnl1         |
| ENSMUSG00000022999 | 7813 Lmbr1l        |
| ENSMUSG00000037531 | 7814 Mrpl47        |
| ENSMUSG00000021730 | 7815 Hcn1          |
| ENSMUSG00000046178 | 7816 Nxph1         |
| ENSMUSG00000020121 | 7817 Srgap1        |
| ENSMUSG00000057367 | 7818 Birc2         |
| ENSMUSG00000026576 | 7819 Atp1b1        |
| ENSMUSG00000045106 | 7820 Ccdc73        |
| ENSMUSG00000078598 | 7821 Skint5        |
| ENSMUSG00000039531 | 7822 Zufsp         |
| ENSMUSG00000024789 | 7823 Jak2          |
| ENSMUSG00000045248 | 7824 Med26         |
| ENSMUSG00000046962 | 7825 Zbtb21        |
| ENSMUSG00000098097 | 7826 6530403H02Rik |
| ENSMUSG00000014786 | 7827 Slc9a5        |
| ENSMUSG00000052551 | 7828 Adarb2        |
| ENSMUSG00000040865 | 7829 Ino80d        |
| ENSMUSG00000055312 | 7830 Them7         |
| ENSMUSG00000043415 | 7831 Otud1         |
| ENSMUSG00000060715 | 7832 1700019A02Rik |
| ENSMUSG00000035953 | 7833 Tmem55b       |
| ENSMUSG00000083087 | 7834 Gm11249       |
| ENSMUSG00000032534 | 7835 Cep63         |
| ENSMUSG00000054162 | 7836 Spock3        |
| ENSMUSG00000004768 | 7837 Rab23         |
| ENSMUSG00000086914 | 7838 Gm16124       |
| ENSMUSG00000073542 | 7839 Cep76         |
| ENSMUSG00000095720 | 7840 Gm1604b       |
| ENSMUSG00000032750 | 7841 Gab3          |
| ENSMUSG00000036339 | 7842 Tmem260       |
| ENSMUSG00000103396 | 7843 Gm38305       |
| ENSMUSG00000021728 | 7844 Emb           |
| ENSMUSG00000024082 | 7845 Ndufaf7       |
| ENSMUSG00000033972 | 7846 Zfp944        |
| ENSMUSG00000003444 | 7847 Med29         |
| ENSMUSG00000060470 | 7848 Adgrg3        |
| ENSMUSG00000022453 | 7849 Naga          |
| ENSMUSG00000034723 | 7850 Tmx4          |
| ENSMUSG00000079557 | 7851 2-Mar         |
| ENSMUSG00000036523 | 7852 Greb1         |

|                    |                    |
|--------------------|--------------------|
| ENSMUSG00000042505 | 7853 Sdhaf3        |
| ENSMUSG00000040651 | 7854 Fam208a       |
| ENSMUSG00000032586 | 7855 Traip         |
| ENSMUSG00000030020 | 7856 Prickle2      |
| ENSMUSG00000096188 | 7857 Cmtm4         |
| ENSMUSG00000019808 | 7858 Adat2         |
| ENSMUSG00000024713 | 7859 Pcsk5         |
| ENSMUSG00000078870 | 7860 Gm14410       |
| ENSMUSG00000005583 | 7861 Mef2c         |
| ENSMUSG00000043140 | 7862 Tmem186       |
| ENSMUSG00000073481 | 7863 2-Mar         |
| ENSMUSG00000047965 | 7864 Rpl9-ps7      |
| ENSMUSG00000091818 | 7865 Rpl19-ps4     |
| ENSMUSG00000054136 | 7866 Adm2          |
| ENSMUSG00000033478 | 7867 Fam160b1      |
| ENSMUSG00000074553 | 7868 Eif1-ps1      |
| ENSMUSG00000051306 | 7869 Usp42         |
| ENSMUSG00000090112 | 7870 Shprh         |
| ENSMUSG00000024220 | 7871 Zfp523        |
| ENSMUSG00000016409 | 7872 Nkap          |
| ENSMUSG00000089762 | 7873 Ier5l         |
| ENSMUSG00000060671 | 7874 Atp8b2        |
| ENSMUSG00000028634 | 7875 Hivep3        |
| ENSMUSG00000020086 | 7876 H2afy2        |
| ENSMUSG00000042793 | 7877 Lgr6          |
| ENSMUSG00000028023 | 7878 Pitx2         |
| ENSMUSG00000029821 | 7879 Dfna5         |
| ENSMUSG00000038349 | 7880 Plcl1         |
| ENSMUSG00000030630 | 7881 Fah           |
| ENSMUSG00000064115 | 7882 Cadm2         |
| ENSMUSG00000024293 | 7883 Esco1         |
| ENSMUSG00000026343 | 7884 Gpr39         |
| ENSMUSG00000006526 | 7885 Tmem110       |
| ENSMUSG00000060512 | 7886 0610040J01Rik |
| ENSMUSG00000042042 | 7887 Csgalnact2    |
| ENSMUSG00000090219 | 7888 4930516K23Rik |
| ENSMUSG00000073643 | 7889 Wdfy1         |
| ENSMUSG00000030727 | 7890 Rabep2        |
| ENSMUSG00000028104 | 7891 Polr3gl       |
| ENSMUSG00000032119 | 7892 Hinfp         |
| ENSMUSG00000054423 | 7893 Cadps         |
| ENSMUSG00000030592 | 7894 Ryr1          |

|                     |               |
|---------------------|---------------|
| ENSMUSG00000001467  | 7895 Cyp51    |
| ENSMUSG000000032913 | 7896 Lrig2    |
| ENSMUSG000000078521 | 7897 Aunip    |
| ENSMUSG000000010554 | 7898 Mettl16  |
| ENSMUSG000000083798 | 7899 Gm14584  |
| ENSMUSG000000021895 | 7900 Arhgef3  |
| ENSMUSG000000021806 | 7901 Nid2     |
| ENSMUSG000000019838 | 7902 Slc16a10 |
| ENSMUSG000000031595 | 7903 Pdgfrl   |
| ENSMUSG000000020843 | 7904 Timm22   |
| ENSMUSG000000035382 | 7905 Pcsk7    |
| ENSMUSG000000052369 | 7906 Tmem106c |
| ENSMUSG000000034032 | 7907 Rpap1    |
| ENSMUSG000000037214 | 7908 Thap1    |
| ENSMUSG000000034430 | 7909 Zxdc     |
| ENSMUSG000000009406 | 7910 Elk1     |
| ENSMUSG000000038236 | 7911 Hoxa7    |
| ENSMUSG000000016262 | 7912 Sertad4  |
| ENSMUSG000000020300 | 7913 Cpeb4    |
| ENSMUSG000000026812 | 7914 Tsc1     |
| ENSMUSG000000034761 | 7915 Map4k5   |
| ENSMUSG000000085444 | 7916 Gm13936  |
| ENSMUSG000000047109 | 7917 Cldn14   |
| ENSMUSG000000015478 | 7918 Rnf5     |
| ENSMUSG000000066152 | 7919 Slc31a2  |
| ENSMUSG000000022668 | 7920 Gtpbp8   |
| ENSMUSG000000035476 | 7921 Tab3     |
| ENSMUSG000000079297 | 7922 Gm2223   |
| ENSMUSG000000084384 | 7923 Gm12251  |
| ENSMUSG000000032014 | 7924 Oaf      |
| ENSMUSG000000004568 | 7925 Arhgef18 |
| ENSMUSG000000025949 | 7926 Pikfyve  |
| ENSMUSG000000038957 | 7927 Edc3     |
| ENSMUSG000000070003 | 7928 Ssbp4    |
| ENSMUSG000000034303 | 7929 Ccdc15   |
| ENSMUSG000000049305 | 7930 Ccdc71   |
| ENSMUSG000000039018 | 7931 Mtg1     |
| ENSMUSG000000024697 | 7932 Gna14    |
| ENSMUSG000000002603 | 7933 Tgfb1    |
| ENSMUSG000000032086 | 7934 Bace1    |
| ENSMUSG000000034930 | 7935 Rtnk     |
| ENSMUSG000000047094 | 7936 Ofcc1    |

|                     |              |
|---------------------|--------------|
| ENSMUSG00000032017  | 7937 Grik4   |
| ENSMUSG00000040520  | 7938 Manea   |
| ENSMUSG00000084894  | 7939 Gm13834 |
| ENSMUSG00000081871  | 7940 Gm11488 |
| ENSMUSG00000003228  | 7941 Grk5    |
| ENSMUSG00000023267  | 7942 Gabrr2  |
| ENSMUSG000000107389 | 7943 Gm43124 |
| ENSMUSG00000045374  | 7944 Wdr81   |
| ENSMUSG00000038205  | 7945 Prkab2  |
| ENSMUSG00000025592  | 7946 Dach2   |
| ENSMUSG00000073633  | 7947 Fbxo36  |
| ENSMUSG00000017417  | 7948 Plxdc1  |
| ENSMUSG000000101227 | 7949 Gm29506 |
| ENSMUSG00000042903  | 7950 Foxo4   |
| ENSMUSG00000022787  | 7951 Wdr53   |
| ENSMUSG00000022672  | 7952 Prkdc   |
| ENSMUSG00000091264  | 7953 Smim13  |
| ENSMUSG00000059714  | 7954 Flot1   |
| ENSMUSG00000039765  | 7955 Cc2d2a  |
| ENSMUSG00000049739  | 7956 Zfp646  |
| ENSMUSG00000091685  | 7957 Gm17359 |
| ENSMUSG00000028568  | 7958 Btf3l4  |
| ENSMUSG00000042628  | 7959 Zfyve1  |
| ENSMUSG00000038437  | 7960 Mllt6   |
| ENSMUSG00000031706  | 7961 Rfx1    |
| ENSMUSG00000023243  | 7962 Kcnk5   |
| ENSMUSG00000036561  | 7963 Ppp6r2  |
| ENSMUSG00000075270  | 7964 Pde11a  |
| ENSMUSG00000016940  | 7965 Kctd2   |
| ENSMUSG00000008855  | 7966 Hdac5   |
| ENSMUSG00000017679  | 7967 Ttpal   |
| ENSMUSG00000027439  | 7968 Gzf1    |
| ENSMUSG00000003527  | 7969 Dgcr14  |
| ENSMUSG00000040596  | 7970 Pogk    |
| ENSMUSG00000056267  | 7971 Cep70   |
| ENSMUSG00000040972  | 7972 Igsf21  |
| ENSMUSG00000028175  | 7973 Depdc1a |
| ENSMUSG00000019975  | 7974 Ikbip   |
| ENSMUSG00000031669  | 7975 Gins3   |
| ENSMUSG00000022863  | 7976 Btg3    |
| ENSMUSG00000029161  | 7977 Cgref1  |
| ENSMUSG00000026788  | 7978 Zbtb43  |

|                    |                    |
|--------------------|--------------------|
| ENSMUSG00000028698 | 7979 Pik3r3        |
| ENSMUSG00000038145 | 7980 Snrk          |
| ENSMUSG00000021550 | 7981 2210016F16Rik |
| ENSMUSG00000022529 | 7982 Zfp263        |
| ENSMUSG00000040265 | 7983 Dnm3          |
| ENSMUSG00000029815 | 7984 Malsu1        |
| ENSMUSG00000068394 | 7985 Cep152        |
| ENSMUSG00000006281 | 7986 Tep1          |
| ENSMUSG00000031557 | 7987 Plekha2       |
| ENSMUSG00000023191 | 7988 P3h3          |
| ENSMUSG00000030685 | 7989 Kctd13        |
| ENSMUSG00000038949 | 7990 Cnst          |
| ENSMUSG00000027082 | 7991 Tfpi          |
| ENSMUSG00000043301 | 7992 Kcnj6         |
| ENSMUSG00000046733 | 7993 Gprc5a        |
| ENSMUSG00000030092 | 7994 Cntn6         |
| ENSMUSG00000037347 | 7995 Chst7         |
| ENSMUSG00000060594 | 7996 Layn          |
| ENSMUSG00000033157 | 7997 Abhd10        |
| ENSMUSG00000031753 | 7998 Cog4          |
| ENSMUSG00000068922 | 7999 Msto1         |
| ENSMUSG00000028962 | 8000 Slc4a2        |
| ENSMUSG00000026203 | 8001 Dnajb2        |
| ENSMUSG00000047030 | 8002 Spata2        |
| ENSMUSG00000033386 | 8003 Frrs1         |
| ENSMUSG00000024410 | 8004 3110002H16Rik |
| ENSMUSG00000071253 | 8005 Slc25a16      |
| ENSMUSG00000017299 | 8006 Dnttip1       |
| ENSMUSG00000045294 | 8007 Insig1        |
| ENSMUSG00000010609 | 8008 Psen2         |
| ENSMUSG00000010538 | 8009 Tsacc         |
| ENSMUSG00000004633 | 8010 Chn2          |
| ENSMUSG00000050103 | 8011 Agmo          |
| ENSMUSG00000042501 | 8012 Cpa6          |
| ENSMUSG00000030034 | 8013 Ino80b        |
| ENSMUSG00000030256 | 8014 Bhlhe41       |
| ENSMUSG00000020695 | 8015 Mrc2          |
| ENSMUSG00000041670 | 8016 Rims1         |
| ENSMUSG00000025575 | 8017 Cant1         |
| ENSMUSG00000036766 | 8018 Dner          |
| ENSMUSG00000020621 | 8019 Rdh14         |
| ENSMUSG00000051790 | 8020 Nlgn2         |

|                    |                    |
|--------------------|--------------------|
| ENSMUSG00000045136 | 8021 Tubb2b        |
| ENSMUSG00000038965 | 8022 Ube2l3        |
| ENSMUSG00000021070 | 8023 Bdkrb2        |
| ENSMUSG00000030246 | 8024 Ldhd          |
| ENSMUSG00000098150 | 8025 4921515E04Rik |
| ENSMUSG00000033952 | 8026 Aspm          |
| ENSMUSG00000058291 | 8027 Zfp68         |
| ENSMUSG00000075266 | 8028 Cenpw         |
| ENSMUSG00000038500 | 8029 Prr3          |
| ENSMUSG00000052102 | 8030 Gnpda1        |
| ENSMUSG00000037740 | 8031 Mrps26        |
| ENSMUSG00000018672 | 8032 Copz2         |
| ENSMUSG00000047098 | 8033 Rnf31         |
| ENSMUSG00000074480 | 8034 Mex3a         |
| ENSMUSG00000033671 | 8035 Cep350        |
| ENSMUSG00000021464 | 8036 Ror2          |
| ENSMUSG00000039917 | 8037 Rhbdd2        |
| ENSMUSG00000026632 | 8038 Tatdn3        |
| ENSMUSG00000002781 | 8039 Tmem143       |
| ENSMUSG00000030519 | 8040 Apba2         |
| ENSMUSG00000039985 | 8041 Fam60a        |
| ENSMUSG00000026819 | 8042 Slc25a25      |
| ENSMUSG00000058638 | 8043 Zfp110        |
| ENSMUSG00000020522 | 8044 Mfap3         |
| ENSMUSG00000032386 | 8045 Trip4         |
| ENSMUSG00000040022 | 8046 Rab11fip2     |
| ENSMUSG00000045404 | 8047 Kcnk13        |
| ENSMUSG00000032925 | 8048 Itgbl1        |
| ENSMUSG00000027569 | 8049 Mrgbp         |
| ENSMUSG00000025764 | 8050 Jade1         |
| ENSMUSG00000078695 | 8051 Cisd3         |
| ENSMUSG00000039483 | 8052 Asb6          |
| ENSMUSG00000026269 | 8053 Rnpepl1       |
| ENSMUSG00000029153 | 8054 Ociad2        |
| ENSMUSG00000062376 | 8055 Borcs7        |
| ENSMUSG00000036875 | 8056 Dna2          |
| ENSMUSG00000066357 | 8057 Wdr6          |
| ENSMUSG00000022095 | 8058 Fam160b2      |
| ENSMUSG00000051346 | 8059 Spryd4        |
| ENSMUSG00000036835 | 8060 Psenen        |
| ENSMUSG00000025092 | 8061 Hspa12a       |
| ENSMUSG00000020948 | 8062 Khl28         |



|                     |                    |
|---------------------|--------------------|
| ENSMUSG00000075590  | 8063 Nrbp2         |
| ENSMUSG00000060882  | 8064 Kcnd2         |
| ENSMUSG00000022965  | 8065 Ifngr2        |
| ENSMUSG00000030323  | 8066 Ift122        |
| ENSMUSG00000007989  | 8067 Fzd3          |
| ENSMUSG00000030045  | 8068 Mrpl19        |
| ENSMUSG00000042050  | 8069 Wdr60         |
| ENSMUSG00000024846  | 8070 Cst6          |
| ENSMUSG00000059343  | 8071 Aldoart1      |
| ENSMUSG000000104543 | 8072 Gm6602        |
| ENSMUSG00000029314  | 8073 Agpat9        |
| ENSMUSG00000054894  | 8074 Atp5s         |
| ENSMUSG00000042207  | 8075 Kdm5b         |
| ENSMUSG00000021824  | 8076 Ap3m1         |
| ENSMUSG00000061062  | 8077 Gm10093       |
| ENSMUSG00000029729  | 8078 Zkscan1       |
| ENSMUSG00000060181  | 8079 Slc35e3       |
| ENSMUSG00000014329  | 8080 Bicc1         |
| ENSMUSG00000020600  | 8081 Slc7a15       |
| ENSMUSG00000034973  | 8082 Dopey1        |
| ENSMUSG00000058351  | 8083 Smim4         |
| ENSMUSG00000021252  | 8084 0610007P14Rik |
| ENSMUSG00000026730  | 8085 Pter          |
| ENSMUSG00000034757  | 8086 Tmub2         |
| ENSMUSG00000045917  | 8087 6330416G13Rik |
| ENSMUSG00000022151  | 8088 Ttc33         |
| ENSMUSG00000067608  | 8089 Pcna-ps2      |
| ENSMUSG00000038042  | 8090 Ptpdc1        |
| ENSMUSG00000035845  | 8091 Alg12         |
| ENSMUSG00000036155  | 8092 Mgat5         |
| ENSMUSG00000051951  | 8093 Xkr4          |
| ENSMUSG00000051495  | 8094 Irf2bp2       |
| ENSMUSG00000058420  | 8095 Syt17         |
| ENSMUSG00000022419  | 8096 Deptor        |
| ENSMUSG00000075705  | 8097 Msrb1         |
| ENSMUSG00000026249  | 8098 Serpine2      |
| ENSMUSG00000039745  | 8099 Htatip2       |
| ENSMUSG00000045252  | 8100 Zfp574        |
| ENSMUSG00000031355  | 8101 Arhgap6       |
| ENSMUSG00000038970  | 8102 Lmtk2         |
| ENSMUSG00000034371  | 8103 Tkfc          |
| ENSMUSG00000045180  | 8104 Shroom2       |

|                    |                    |
|--------------------|--------------------|
| ENSMUSG00000069208 | 8105 Zfp825        |
| ENSMUSG00000026413 | 8106 Pkp1          |
| ENSMUSG00000000938 | 8107 Hoxa10        |
| ENSMUSG00000004872 | 8108 Pax3          |
| ENSMUSG00000108725 | 8109 RP23-470G18.4 |
| ENSMUSG00000025602 | 8110 Zfp202        |
| ENSMUSG00000028295 | 8111 Smim8         |
| ENSMUSG00000038344 | 8112 Txlng         |
| ENSMUSG00000039942 | 8113 Ptger4        |
| ENSMUSG00000005057 | 8114 Sh2b2         |
| ENSMUSG00000105461 | 8115 Gm4742        |
| ENSMUSG00000026811 | 8116 St6galnac6    |
| ENSMUSG00000073664 | 8117 Nbeal1        |
| ENSMUSG00000028549 | 8118 Itgb3bp       |
| ENSMUSG00000000134 | 8119 Tfe3          |
| ENSMUSG00000020721 | 8120 Helz          |
| ENSMUSG00000073177 | 8121 Gm773         |
| ENSMUSG00000035356 | 8122 Nfkbiz        |
| ENSMUSG00000041777 | 8123 Cir1          |
| ENSMUSG00000026068 | 8124 Il18rap       |
| ENSMUSG00000036430 | 8125 Tbcc          |
| ENSMUSG00000060568 | 8126 Fam78b        |
| ENSMUSG00000067713 | 8127 Prkag1        |
| ENSMUSG00000060708 | 8128 Bloc1s4       |
| ENSMUSG00000104301 | 8129 Wdr49         |
| ENSMUSG00000048960 | 8130 Prex2         |
| ENSMUSG00000020788 | 8131 Atp2a3        |
| ENSMUSG00000102343 | 8132 Gm37381       |
| ENSMUSG00000054302 | 8133 Eapp          |
| ENSMUSG00000031342 | 8134 Gpm6b         |
| ENSMUSG00000039376 | 8135 Synpo2l       |
| ENSMUSG00000031586 | 8136 Rbpms         |
| ENSMUSG00000031257 | 8137 Nox1          |
| ENSMUSG00000020541 | 8138 Tom1l1        |
| ENSMUSG00000033735 | 8139 Spr           |
| ENSMUSG00000053080 | 8140 2700081O15Rik |
| ENSMUSG00000034175 | 8141 Rhbdd3        |
| ENSMUSG00000056131 | 8142 Pgm3          |
| ENSMUSG00000026483 | 8143 Fam129a       |
| ENSMUSG00000002289 | 8144 Angptl4       |
| ENSMUSG00000021694 | 8145 Ercc8         |
| ENSMUSG00000045598 | 8146 Zfp553        |

|                    |                    |
|--------------------|--------------------|
| ENSMUSG00000098985 | 8147 Gm27219       |
| ENSMUSG00000038126 | 8148 Mphosph9      |
| ENSMUSG00000081768 | 8149 Gm12755       |
| ENSMUSG00000038831 | 8150 Ralgps1       |
| ENSMUSG00000001995 | 8151 Sipa1l2       |
| ENSMUSG00000033439 | 8152 Trmt13        |
| ENSMUSG00000019971 | 8153 Cep290        |
| ENSMUSG00000096240 | 8154 Gm21830       |
| ENSMUSG00000037628 | 8155 Cdkn3         |
| ENSMUSG00000049504 | 8156 Proser1       |
| ENSMUSG00000052560 | 8157 Cpne8         |
| ENSMUSG00000025137 | 8158 Pcyt2         |
| ENSMUSG00000039968 | 8159 Rsbn1l        |
| ENSMUSG00000093482 | 8160 Gm20619       |
| ENSMUSG00000003623 | 8161 Crot          |
| ENSMUSG00000033906 | 8162 Zdhhc15       |
| ENSMUSG00000039834 | 8163 Zfp335        |
| ENSMUSG00000102483 | 8164 Gm7068        |
| ENSMUSG00000027896 | 8165 Slc16a4       |
| ENSMUSG00000031337 | 8166 Mtm1          |
| ENSMUSG00000036223 | 8167 Ska1          |
| ENSMUSG00000023345 | 8168 Poc1a         |
| ENSMUSG00000050334 | 8169 C130071C03Rik |
| ENSMUSG00000079666 | 8170 1700015F17Rik |
| ENSMUSG00000106052 | 8171 Gm43614       |
| ENSMUSG00000069895 | 8172 Atxn1l        |
| ENSMUSG00000015806 | 8173 Qdpr          |
| ENSMUSG00000046058 | 8174 Eid2          |
| ENSMUSG00000026253 | 8175 Chrng         |
| ENSMUSG00000031925 | 8176 Maml2         |
| ENSMUSG00000042389 | 8177 Tsen2         |
| ENSMUSG00000037185 | 8178 Krt80         |
| ENSMUSG00000027300 | 8179 Ubox5         |
| ENSMUSG00000090509 | 8180 Sfta2         |
| ENSMUSG00000026817 | 8181 Ak1           |
| ENSMUSG00000000884 | 8182 Gnb1l         |
| ENSMUSG00000020973 | 8183 Dnaaf2        |
| ENSMUSG00000043340 | 8184 6530409C15Rik |
| ENSMUSG00000039470 | 8185 Zdhhc2        |
| ENSMUSG00000097145 | 8186 9230114K14Rik |
| ENSMUSG00000065408 | 8187 Mir31         |
| ENSMUSG00000102558 | 8188 Gm37571       |

|                     |                    |
|---------------------|--------------------|
| ENSMUSG00000030243  | 8189 Recql         |
| ENSMUSG00000050447  | 8190 Lypd6         |
| ENSMUSG00000026135  | 8191 Zfp142        |
| ENSMUSG00000005803  | 8192 Sqrdl         |
| ENSMUSG00000036188  | 8193 Ankmy2        |
| ENSMUSG00000027981  | 8194 Rnpc3         |
| ENSMUSG00000002963  | 8195 Pnkp          |
| ENSMUSG00000007827  | 8196 Ankrd26       |
| ENSMUSG00000028521  | 8197 Slc35d1       |
| ENSMUSG00000026000  | 8198 Lancl1        |
| ENSMUSG00000034663  | 8199 Bmp2k         |
| ENSMUSG00000027746  | 8200 Ufm1          |
| ENSMUSG00000033685  | 8201 Ucp2          |
| ENSMUSG00000037447  | 8202 Arid5a        |
| ENSMUSG00000038871  | 8203 Bpgm          |
| ENSMUSG00000041420  | 8204 Meis3         |
| ENSMUSG00000038248  | 8205 Sobp          |
| ENSMUSG00000068744  | 8206 Psrc1         |
| ENSMUSG000000101316 | 8207 Gm12663       |
| ENSMUSG000000101537 | 8208 Gm29571       |
| ENSMUSG00000051022  | 8209 Hs3st1        |
| ENSMUSG00000020778  | 8210 Ten1          |
| ENSMUSG00000035189  | 8211 Ano4          |
| ENSMUSG00000026826  | 8212 Nr4a2         |
| ENSMUSG00000097497  | 8213 Gm26652       |
| ENSMUSG00000032666  | 8214 1700025G04Rik |
| ENSMUSG00000021451  | 8215 Sema4d        |
| ENSMUSG00000022652  | 8216 Morc1         |
| ENSMUSG00000081888  | 8217 Spcs2-ps      |
| ENSMUSG00000070462  | 8218 Mesdc1        |
| ENSMUSG00000041936  | 8219 Agrn          |
| ENSMUSG00000073838  | 8220 Tufm          |
| ENSMUSG00000030868  | 8221 Dctn5         |
| ENSMUSG00000036006  | 8222 Fam65b        |
| ENSMUSG00000021930  | 8223 Spryd7        |
| ENSMUSG00000022008  | 8224 Gpalpp1       |
| ENSMUSG00000042178  | 8225 Armc5         |
| ENSMUSG00000029778  | 8226 Adcyap1r1     |
| ENSMUSG00000004558  | 8227 Ndrp2         |
| ENSMUSG00000026455  | 8228 Klhl12        |
| ENSMUSG00000025656  | 8229 Arhgef9       |
| ENSMUSG00000052748  | 8230 Swt1          |

|                     |                    |
|---------------------|--------------------|
| ENSMUSG00000031441  | 8231 Atp11a        |
| ENSMUSG00000009687  | 8232 Fxyd5         |
| ENSMUSG00000074736  | 8233 Syndig1       |
| ENSMUSG00000024792  | 8234 Zfpl1         |
| ENSMUSG00000024579  | 8235 Pcyox1l       |
| ENSMUSG00000027506  | 8236 Tpd52         |
| ENSMUSG00000039244  | 8237 E130309D02Rik |
| ENSMUSG00000069011  | 8238 Gm10254       |
| ENSMUSG00000019996  | 8239 Map7          |
| ENSMUSG000000051220 | 8240 Ercc6l        |
| ENSMUSG00000043987  | 8241 Cep164        |
| ENSMUSG00000035378  | 8242 Shq1          |
| ENSMUSG00000025145  | 8243 Lrrc45        |
| ENSMUSG00000090523  | 8244 Gypc          |
| ENSMUSG00000036985  | 8245 Zdhhc9        |
| ENSMUSG00000032641  | 8246 Gpr19         |
| ENSMUSG00000020740  | 8247 Gga3          |
| ENSMUSG00000057230  | 8248 Aak1          |
| ENSMUSG00000040183  | 8249 Ankrd6        |
| ENSMUSG00000040950  | 8250 Mgl2          |
| ENSMUSG00000043683  | 8251 Fem1a         |
| ENSMUSG00000087538  | 8252 Gm16341       |
| ENSMUSG00000041649  | 8253 Klf8          |
| ENSMUSG00000020381  | 8254 3010026O09Rik |
| ENSMUSG00000033207  | 8255 Mamdc2        |
| ENSMUSG00000026601  | 8256 Axdnd1        |
| ENSMUSG00000060681  | 8257 Slc9a6        |
| ENSMUSG00000019891  | 8258 Dcbld1        |
| ENSMUSG00000067369  | 8259 Trmt2b        |
| ENSMUSG00000036611  | 8260 Eepd1         |
| ENSMUSG00000033542  | 8261 Arhgef5       |
| ENSMUSG00000056941  | 8262 Commd7        |
| ENSMUSG00000021815  | 8263 Mss51         |
| ENSMUSG00000061802  | 8264 Armc4         |
| ENSMUSG00000037553  | 8265 Zdhhc18       |
| ENSMUSG00000020847  | 8266 Rph3al        |
| ENSMUSG00000068141  | 8267 Gm10232       |
| ENSMUSG00000068686  | 8268 Cd59b         |
| ENSMUSG00000000295  | 8269 Hddc2         |
| ENSMUSG00000043635  | 8270 Adamts3       |
| ENSMUSG00000079608  | 8271 Stard6        |
| ENSMUSG00000050312  | 8272 Nsun3         |

|                    |                |
|--------------------|----------------|
| ENSMUSG00000074876 | 8273 Spata5l1  |
| ENSMUSG00000044072 | 8274 Eml6      |
| ENSMUSG00000029428 | 8275 Stx2      |
| ENSMUSG00000038564 | 8276 Ift172    |
| ENSMUSG00000028470 | 8277 Hint2     |
| ENSMUSG00000034863 | 8278 Ano8      |
| ENSMUSG00000006369 | 8279 Fbln1     |
| ENSMUSG00000045333 | 8280 Zfp423    |
| ENSMUSG00000045165 | 8281 Al467606  |
| ENSMUSG00000057060 | 8282 Slc35f3   |
| ENSMUSG00000025821 | 8283 Zfp282    |
| ENSMUSG00000020151 | 8284 Ptprr     |
| ENSMUSG00000054717 | 8285 Hmgb2     |
| ENSMUSG00000047757 | 8286 Fancb     |
| ENSMUSG00000028456 | 8287 Unc13b    |
| ENSMUSG00000027556 | 8288 Car1      |
| ENSMUSG00000026339 | 8289 Ccdc93    |
| ENSMUSG00000025912 | 8290 Mybl1     |
| ENSMUSG00000021273 | 8291 Fdft1     |
| ENSMUSG00000027993 | 8292 Trim2     |
| ENSMUSG00000041658 | 8293 Rragb     |
| ENSMUSG00000015222 | 8294 Map2      |
| ENSMUSG00000044715 | 8295 Gskip     |
| ENSMUSG00000030170 | 8296 Wnt5b     |
| ENSMUSG00000020659 | 8297 Cbll1     |
| ENSMUSG00000022401 | 8298 Xpnpep3   |
| ENSMUSG00000069520 | 8299 Tmem19    |
| ENSMUSG00000027784 | 8300 Ppm1l     |
| ENSMUSG00000038217 | 8301 Tlcd2     |
| ENSMUSG00000041623 | 8302 D11Wsu47e |
| ENSMUSG00000047777 | 8303 Phf13     |
| ENSMUSG00000045438 | 8304 Cox19     |
| ENSMUSG00000046186 | 8305 Cd109     |
| ENSMUSG00000028969 | 8306 Cdk5      |
| ENSMUSG00000043991 | 8307 Pura      |
| ENSMUSG00000084907 | 8308 Gm14505   |
| ENSMUSG00000026024 | 8309 Als2      |
| ENSMUSG00000022960 | 8310 Donson    |
| ENSMUSG00000052429 | 8311 Prmt1     |
| ENSMUSG00000047264 | 8312 Zfp358    |
| ENSMUSG00000039725 | 8313 Trp53rka  |
| ENSMUSG00000036291 | 8314 Ap5m1     |

|                    |                    |
|--------------------|--------------------|
| ENSMUSG00000033585 | 8315 Ndn           |
| ENSMUSG00000002985 | 8316 Apoe          |
| ENSMUSG00000034189 | 8317 Hsd11         |
| ENSMUSG00000022639 | 8318 Dubr          |
| ENSMUSG00000022978 | 8319 Mis18a        |
| ENSMUSG00000054793 | 8320 Cadm4         |
| ENSMUSG00000029263 | 8321 Pigg          |
| ENSMUSG00000028415 | 8322 Spink4        |
| ENSMUSG00000002489 | 8323 Tiam1         |
| ENSMUSG00000021852 | 8324 Slc35f4       |
| ENSMUSG00000033111 | 8325 3830406C13Rik |
| ENSMUSG00000015597 | 8326 Zfp318        |
| ENSMUSG00000045576 | 8327 St7l          |
| ENSMUSG00000030681 | 8328 Mvp           |
| ENSMUSG00000073002 | 8329 Vamp5         |
| ENSMUSG00000025533 | 8330 Asl           |
| ENSMUSG00000062510 | 8331 Nsl1          |
| ENSMUSG00000087341 | 8332 0610040F04Rik |
| ENSMUSG00000019997 | 8333 Ctgf          |
| ENSMUSG00000002428 | 8334 Hltf          |
| ENSMUSG00000025025 | 8335 Mxi1          |
| ENSMUSG00000017418 | 8336 Arl5b         |
| ENSMUSG00000049231 | 8337 Gm12497       |
| ENSMUSG00000068580 | 8338 Zfyve19       |
| ENSMUSG00000056271 | 8339 Lman1l        |
| ENSMUSG00000078484 | 8340 Klhl17        |
| ENSMUSG00000093671 | 8341 Gm20656       |
| ENSMUSG00000033577 | 8342 Myo6          |
| ENSMUSG00000022994 | 8343 Adcy6         |
| ENSMUSG00000019214 | 8344 Chtf18        |
| ENSMUSG00000073557 | 8345 Ppp1r12b      |
| ENSMUSG00000044499 | 8346 Hs3st5        |
| ENSMUSG00000027977 | 8347 Ndst3         |
| ENSMUSG00000028042 | 8348 Zbtb7b        |
| ENSMUSG00000001552 | 8349 Jup           |
| ENSMUSG00000018821 | 8350 Avpi1         |
| ENSMUSG00000025420 | 8351 Katnal2       |
| ENSMUSG00000086859 | 8352 Snhg20        |
| ENSMUSG00000030166 | 8353 Rad52         |
| ENSMUSG00000037622 | 8354 Wdtdc1        |
| ENSMUSG00000087097 | 8355 4930586N03Rik |
| ENSMUSG00000042978 | 8356 Sbk1          |

|                    |                    |
|--------------------|--------------------|
| ENSMUSG00000026999 | 8357 Nup35         |
| ENSMUSG00000033083 | 8358 Tbc1d4        |
| ENSMUSG00000034591 | 8359 Slc41a2       |
| ENSMUSG00000001418 | 8360 Glmp          |
| ENSMUSG00000051890 | 8361 Klhdc1        |
| ENSMUSG00000071350 | 8362 Setdb2        |
| ENSMUSG00000082575 | 8363 Gm13050       |
| ENSMUSG00000028182 | 8364 Lrriq3        |
| ENSMUSG00000037134 | 8365 Prmt10        |
| ENSMUSG00000051729 | 8366 Gm5087        |
| ENSMUSG00000017307 | 8367 Acot8         |
| ENSMUSG00000031090 | 8368 Nadsyn1       |
| ENSMUSG00000037736 | 8369 Limch1        |
| ENSMUSG00000051344 | 8370 Plekhm3       |
| ENSMUSG00000062170 | 8371 Fmr1nb        |
| ENSMUSG00000019865 | 8372 Nnbr          |
| ENSMUSG00000101892 | 8373 9130401M01Rik |
| ENSMUSG00000026240 | 8374 Cops7b        |
| ENSMUSG00000030064 | 8375 Frmd4b        |
| ENSMUSG00000086454 | 8376 Platr14       |
| ENSMUSG00000050663 | 8377 Trhde         |
| ENSMUSG00000072511 | 8378 Hhla1         |
| ENSMUSG00000036565 | 8379 Ttyh3         |
| ENSMUSG00000102416 | 8380 4933424G06Rik |
| ENSMUSG00000027855 | 8381 Sycp1         |
| ENSMUSG00000049038 | 8382 Mterf2        |
| ENSMUSG00000074212 | 8383 Dnajb14       |
| ENSMUSG00000062590 | 8384 Armc9         |
| ENSMUSG00000004127 | 8385 Trmt10a       |
| ENSMUSG00000074825 | 8386 Itpripl1      |
| ENSMUSG00000074733 | 8387 Zfp950        |
| ENSMUSG00000035506 | 8388 Slc12a8       |
| ENSMUSG00000029287 | 8389 Tgfbr3        |
| ENSMUSG00000041779 | 8390 Tram2         |
| ENSMUSG00000079065 | 8391 BC005561      |
| ENSMUSG00000028710 | 8392 Atpaf1        |
| ENSMUSG00000039849 | 8393 Pcif1         |
| ENSMUSG00000047193 | 8394 Dync2h1       |
| ENSMUSG00000023935 | 8395 Spats1        |
| ENSMUSG00000032235 | 8396 Ice2          |
| ENSMUSG00000031482 | 8397 Slc25a15      |
| ENSMUSG00000024269 | 8398 Tpgs2         |



|                    |                    |
|--------------------|--------------------|
| ENSMUSG00000064284 | 8399 Cdpf1         |
| ENSMUSG00000021868 | 8400 Ppif          |
| ENSMUSG00000005580 | 8401 Adcy9         |
| ENSMUSG00000025665 | 8402 Rps6ka6       |
| ENSMUSG00000104882 | 8403 Gm43096       |
| ENSMUSG00000065947 | 8404 mt-Nd4l       |
| ENSMUSG00000032012 | 8405 Pvrl1         |
| ENSMUSG00000004951 | 8406 Hspb1         |
| ENSMUSG00000085614 | 8407 1700123M08Rik |
| ENSMUSG00000037617 | 8408 Spag1         |
| ENSMUSG00000064128 | 8409 Cenpj         |
| ENSMUSG00000057229 | 8410 Atp5sl        |
| ENSMUSG00000041439 | 8411 Mfsd6         |
| ENSMUSG00000026275 | 8412 Ppp1r7        |
| ENSMUSG00000031834 | 8413 Pik3r2        |
| ENSMUSG00000030347 | 8414 D6Wsu163e     |
| ENSMUSG00000034206 | 8415 Polq          |
| ENSMUSG00000026499 | 8416 Acbd3         |
| ENSMUSG00000039308 | 8417 Ndst2         |
| ENSMUSG00000045854 | 8418 Lym2          |
| ENSMUSG00000037251 | 8419 Pomk          |
| ENSMUSG00000038709 | 8420 Txndc8        |
| ENSMUSG00000080877 | 8421 Rpl22-ps1     |
| ENSMUSG00000028479 | 8422 Gne           |
| ENSMUSG00000006435 | 8423 Neurl1a       |
| ENSMUSG00000037126 | 8424 Psd           |
| ENSMUSG00000021179 | 8425 Nrde2         |
| ENSMUSG00000037211 | 8426 Spry1         |
| ENSMUSG00000048440 | 8427 Cyp4f16       |
| ENSMUSG00000056536 | 8428 Pign          |
| ENSMUSG00000003929 | 8429 Zfp81         |
| ENSMUSG00000018861 | 8430 Fdxr          |
| ENSMUSG00000025193 | 8431 Cutc          |
| ENSMUSG00000021636 | 8432 Marveld2      |
| ENSMUSG00000081159 | 8433 Gm6023        |
| ENSMUSG00000021591 | 8434 Glrx          |
| ENSMUSG00000003031 | 8435 Cdkn1b        |
| ENSMUSG00000055923 | 8436 Aasdh         |
| ENSMUSG00000027164 | 8437 Traf6         |
| ENSMUSG00000042228 | 8438 Lyn           |
| ENSMUSG00000007833 | 8439 Aldh16a1      |
| ENSMUSG00000086251 | 8440 Gm12694       |

|                    |                    |
|--------------------|--------------------|
| ENSMUSG00000070526 | 8441 Peg12         |
| ENSMUSG00000102431 | 8442 Gm38052       |
| ENSMUSG00000026578 | 8443 Ccdc181       |
| ENSMUSG00000001569 | 8444 Nom1          |
| ENSMUSG00000043059 | 8445 Zfp513        |
| ENSMUSG00000028756 | 8446 Pink1         |
| ENSMUSG00000008734 | 8447 Gprc5b        |
| ENSMUSG00000062012 | 8448 Zfp13         |
| ENSMUSG00000069045 | 8449 Ddx3y         |
| ENSMUSG00000021752 | 8450 Kctd6         |
| ENSMUSG00000075704 | 8451 Txnrd2        |
| ENSMUSG00000092569 | 8452 Gm20544       |
| ENSMUSG00000030509 | 8453 Asb7          |
| ENSMUSG00000041075 | 8454 Fzd7          |
| ENSMUSG00000031754 | 8455 Nudt21        |
| ENSMUSG00000078974 | 8456 Sec61g        |
| ENSMUSG00000082998 | 8457 Gm11221       |
| ENSMUSG00000005150 | 8458 Wdr83         |
| ENSMUSG00000085711 | 8459 Gm15163       |
| ENSMUSG00000104784 | 8460 Gm42984       |
| ENSMUSG00000021900 | 8461 Btd           |
| ENSMUSG00000027424 | 8462 Mgme1         |
| ENSMUSG00000058706 | 8463 0610030E20Rik |
| ENSMUSG00000075595 | 8464 Zfp652        |
| ENSMUSG00000032782 | 8465 Cntrob        |
| ENSMUSG00000061759 | 8466 Armt1         |
| ENSMUSG00000030539 | 8467 Sema4b        |
| ENSMUSG00000097622 | 8468 A330033J07Rik |
| ENSMUSG00000032262 | 8469 Elovl4        |
| ENSMUSG00000066621 | 8470 Tecpr1        |
| ENSMUSG00000041598 | 8471 Cdc42ep4      |
| ENSMUSG00000022244 | 8472 Amacr         |
| ENSMUSG00000042198 | 8473 Chchd7        |
| ENSMUSG00000062980 | 8474 Cped1         |
| ENSMUSG00000041040 | 8475 Fam117b       |
| ENSMUSG00000026577 | 8476 Blzf1         |
| ENSMUSG00000049686 | 8477 Orai1         |
| ENSMUSG00000038822 | 8478 Hace1         |
| ENSMUSG00000022503 | 8479 Nubp1         |
| ENSMUSG00000036403 | 8480 Cep135        |
| ENSMUSG00000070366 | 8481 Ppapdc1a      |
| ENSMUSG00000021559 | 8482 Dapk1         |

|                    |                    |
|--------------------|--------------------|
| ENSMUSG00000030815 | 8483 Phkg2         |
| ENSMUSG00000032571 | 8484 Pik3r4        |
| ENSMUSG00000020752 | 8485 Recql5        |
| ENSMUSG00000020669 | 8486 Sh3yl1        |
| ENSMUSG00000029787 | 8487 Avl9          |
| ENSMUSG00000107714 | 8488 RP24-314B4.1  |
| ENSMUSG00000058328 | 8489 Xlr5a         |
| ENSMUSG00000032579 | 8490 Hemk1         |
| ENSMUSG00000040732 | 8491 Erg           |
| ENSMUSG00000024077 | 8492 Strn          |
| ENSMUSG00000028114 | 8493 Mettl14       |
| ENSMUSG00000034686 | 8494 Prr7          |
| ENSMUSG00000054792 | 8495 Khlh18        |
| ENSMUSG00000042035 | 8496 Igsf3         |
| ENSMUSG00000020435 | 8497 Osbp2         |
| ENSMUSG00000039841 | 8498 Zfp800        |
| ENSMUSG00000039187 | 8499 Fanci         |
| ENSMUSG00000087383 | 8500 Gm12446       |
| ENSMUSG00000097290 | 8501 1300002E11Rik |
| ENSMUSG00000039081 | 8502 Zfp503        |
| ENSMUSG00000073423 | 8503 Zfp414        |
| ENSMUSG00000055041 | 8504 Commd5        |
| ENSMUSG00000038085 | 8505 Cnbd2         |
| ENSMUSG00000031325 | 8506 4930519F16Rik |
| ENSMUSG00000034391 | 8507 Fbxo15        |
| ENSMUSG00000039431 | 8508 Mtmr7         |
| ENSMUSG00000026127 | 8509 Imp4          |
| ENSMUSG00000041729 | 8510 Coro2b        |
| ENSMUSG00000021365 | 8511 Nedd9         |
| ENSMUSG00000033159 | 8512 Cnppd1        |
| ENSMUSG00000024219 | 8513 Anks1         |
| ENSMUSG00000041483 | 8514 Zfp281        |
| ENSMUSG00000028709 | 8515 Mob3c         |
| ENSMUSG00000028636 | 8516 Ppcs          |
| ENSMUSG00000047153 | 8517 Khnyn         |
| ENSMUSG00000028212 | 8518 Ccne2         |
| ENSMUSG00000040086 | 8519 Tnni3k        |
| ENSMUSG00000040848 | 8520 Sft2d2        |
| ENSMUSG00000086209 | 8521 4933405E24Rik |
| ENSMUSG00000047773 | 8522 Ankfn1        |
| ENSMUSG00000036181 | 8523 Hist1h1c      |
| ENSMUSG00000032057 | 8524 4833427G06Rik |

|                    |                 |
|--------------------|-----------------|
| ENSMUSG00000084067 | 8525 Gm14269    |
| ENSMUSG00000037855 | 8526 Zfp365     |
| ENSMUSG00000020846 | 8527 Fam101b    |
| ENSMUSG00000095562 | 8528 Gm21887    |
| ENSMUSG00000029592 | 8529 Usp30      |
| ENSMUSG00000024963 | 8530 Dnajc4     |
| ENSMUSG00000083854 | 8531 Dnajc19-ps |
| ENSMUSG00000027238 | 8532 Frmd5      |
| ENSMUSG00000040488 | 8533 Ltbp4      |
| ENSMUSG00000035521 | 8534 Gnptg      |
| ENSMUSG00000044442 | 8535 N6amt1     |
| ENSMUSG00000033400 | 8536 Agl        |
| ENSMUSG00000056268 | 8537 Dennd1b    |
| ENSMUSG00000020868 | 8538 Xylt2      |
| ENSMUSG00000031497 | 8539 Tnfsf13b   |
| ENSMUSG00000032812 | 8540 Arap1      |
| ENSMUSG00000046561 | 8541 Arsj       |
| ENSMUSG00000041992 | 8542 Rapgef5    |
| ENSMUSG00000042684 | 8543 Npl        |
| ENSMUSG00000022765 | 8544 Snap29     |
| ENSMUSG00000029790 | 8545 Cep41      |
| ENSMUSG00000022449 | 8546 Adamts20   |
| ENSMUSG00000012640 | 8547 Zfp715     |
| ENSMUSG00000039748 | 8548 Exo1       |
| ENSMUSG00000041216 | 8549 Clvs1      |
| ENSMUSG00000037640 | 8550 Zfp60      |
| ENSMUSG00000100583 | 8551 Gm29443    |
| ENSMUSG00000006289 | 8552 Osgep      |
| ENSMUSG00000032420 | 8553 Nt5e       |
| ENSMUSG00000031749 | 8554 St3gal2    |
| ENSMUSG00000078926 | 8555 Cdc20b     |
| ENSMUSG00000039315 | 8556 Clnk       |
| ENSMUSG00000071076 | 8557 Junb       |
| ENSMUSG00000054737 | 8558 Zfp182     |
| ENSMUSG00000029123 | 8559 Stk32b     |
| ENSMUSG00000025507 | 8560 Pidd1      |
| ENSMUSG00000040746 | 8561 Rnf167     |
| ENSMUSG00000053740 | 8562 Gm6457     |
| ENSMUSG00000029651 | 8563 Mtus2      |
| ENSMUSG00000028199 | 8564 Cryz       |
| ENSMUSG00000084829 | 8565 Gm14266    |
| ENSMUSG00000005374 | 8566 Tbl2       |

|                    |                    |
|--------------------|--------------------|
| ENSMUSG00000042821 | 8567 Snai1         |
| ENSMUSG00000038578 | 8568 Susd1         |
| ENSMUSG00000029229 | 8569 Chic2         |
| ENSMUSG00000034402 | 8570 Kcnh5         |
| ENSMUSG00000037892 | 8571 Pcdh18        |
| ENSMUSG00000027332 | 8572 Ivd           |
| ENSMUSG00000033740 | 8573 St18          |
| ENSMUSG00000038580 | 8574 Sct           |
| ENSMUSG00000024190 | 8575 Dusp1         |
| ENSMUSG00000032462 | 8576 Pik3cb        |
| ENSMUSG00000026707 | 8577 Nsun6         |
| ENSMUSG00000028954 | 8578 Nub1          |
| ENSMUSG00000051550 | 8579 Zfp579        |
| ENSMUSG00000036054 | 8580 Sugp2         |
| ENSMUSG00000082774 | 8581 Gm8805        |
| ENSMUSG00000077450 | 8582 Rab11b        |
| ENSMUSG00000025867 | 8583 Cplx2         |
| ENSMUSG00000018661 | 8584 Cog1          |
| ENSMUSG00000060519 | 8585 Tor3a         |
| ENSMUSG00000025195 | 8586 Dnmbp         |
| ENSMUSG00000037071 | 8587 Scd1          |
| ENSMUSG00000029470 | 8588 P2rx4         |
| ENSMUSG00000055026 | 8589 Gabrg3        |
| ENSMUSG00000035582 | 8590 Gdpd4         |
| ENSMUSG00000026404 | 8591 Ddx59         |
| ENSMUSG00000028351 | 8592 Brinp1        |
| ENSMUSG00000043618 | 8593 Eif5a13-ps    |
| ENSMUSG00000047412 | 8594 Zbtb44        |
| ENSMUSG00000021222 | 8595 Dcaf4         |
| ENSMUSG00000056698 | 8596 Elmod3        |
| ENSMUSG00000040146 | 8597 Rgl3          |
| ENSMUSG00000019774 | 8598 Mtrf1l        |
| ENSMUSG00000031887 | 8599 Tradd         |
| ENSMUSG00000002105 | 8600 Slc39a13      |
| ENSMUSG00000051413 | 8601 Plagl2        |
| ENSMUSG00000005447 | 8602 Pafah1b3      |
| ENSMUSG00000046679 | 8603 C87436        |
| ENSMUSG00000029723 | 8604 Tsc22d4       |
| ENSMUSG00000053070 | 8605 9230110C19Rik |
| ENSMUSG00000024816 | 8606 Frmd8         |
| ENSMUSG00000022971 | 8607 Ifnar2        |
| ENSMUSG00000072623 | 8608 Zfp9          |

|                    |                    |
|--------------------|--------------------|
| ENSMUSG00000034613 | 8609 Ppm1h         |
| ENSMUSG00000049107 | 8610 Ntf3          |
| ENSMUSG00000028016 | 8611 Ints12        |
| ENSMUSG00000074991 | 8612 Gabrr3        |
| ENSMUSG00000082809 | 8613 Gm14150       |
| ENSMUSG00000039201 | 8614 Tbc1d25       |
| ENSMUSG00000066149 | 8615 Cdc26         |
| ENSMUSG00000020191 | 8616 4930415F15Rik |
| ENSMUSG00000097003 | 8617 D930007P13Rik |
| ENSMUSG00000034883 | 8618 Lrr1          |
| ENSMUSG00000020544 | 8619 Cox11         |
| ENSMUSG00000021791 | 8620 Dydc2         |
| ENSMUSG00000021275 | 8621 Tecpr2        |
| ENSMUSG00000017969 | 8622 Ptgis         |
| ENSMUSG00000033707 | 8623 Lrrc24        |
| ENSMUSG00000042359 | 8624 Osbp16        |
| ENSMUSG00000028999 | 8625 Rint1         |
| ENSMUSG00000039323 | 8626 Igfbp2        |
| ENSMUSG00000013150 | 8627 Gfod2         |
| ENSMUSG00000062353 | 8628 Gm15772       |
| ENSMUSG00000037217 | 8629 Syn1          |
| ENSMUSG00000031509 | 8630 1700016D06Rik |
| ENSMUSG00000054099 | 8631 Slc25a40      |
| ENSMUSG00000026880 | 8632 Stom          |
| ENSMUSG00000034449 | 8633 Dhrr11        |
| ENSMUSG00000053965 | 8634 Pde5a         |
| ENSMUSG00000073565 | 8635 Prr16         |
| ENSMUSG00000028492 | 8636 Saxo1         |
| ENSMUSG00000070572 | 8637 Trmt112-ps2   |
| ENSMUSG00000097103 | 8638 Gm2885        |
| ENSMUSG00000037580 | 8639 Gch1          |
| ENSMUSG00000092416 | 8640 Zfp141        |
| ENSMUSG00000074764 | 8641 Sel1l2        |
| ENSMUSG00000037221 | 8642 Mospd3        |
| ENSMUSG00000034285 | 8643 Nipsnap1      |
| ENSMUSG00000053111 | 8644 Fank1         |
| ENSMUSG00000023999 | 8645 Kif6          |
| ENSMUSG00000097113 | 8646 Gm19705       |
| ENSMUSG00000024921 | 8647 Smarca2       |
| ENSMUSG00000082932 | 8648 Cyp2j8        |
| ENSMUSG00000027550 | 8649 Lrrcc1        |
| ENSMUSG00000030094 | 8650 Xpc           |

|                    |                    |
|--------------------|--------------------|
| ENSMUSG00000041845 | 8651 Rhod          |
| ENSMUSG00000026333 | 8652 Gin1          |
| ENSMUSG00000020806 | 8653 Rhbdf2        |
| ENSMUSG00000039354 | 8654 Smarcal1      |
| ENSMUSG00000054728 | 8655 Phactr1       |
| ENSMUSG00000047379 | 8656 B4gat1        |
| ENSMUSG00000036833 | 8657 Pnpla7        |
| ENSMUSG00000020961 | 8658 Ston2         |
| ENSMUSG00000049580 | 8659 Tsku          |
| ENSMUSG00000055148 | 8660 Klf2          |
| ENSMUSG00000022723 | 8661 Crybg3        |
| ENSMUSG00000028469 | 8662 Npr2          |
| ENSMUSG00000025384 | 8663 Faap100       |
| ENSMUSG00000023961 | 8664 Enpp4         |
| ENSMUSG00000024505 | 8665 Dtwd2         |
| ENSMUSG00000021108 | 8666 Prkch         |
| ENSMUSG00000084883 | 8667 Ccdc85c       |
| ENSMUSG00000075122 | 8668 Cd80          |
| ENSMUSG00000039850 | 8669 Endov         |
| ENSMUSG00000092541 | 8670 Gm20537       |
| ENSMUSG00000063605 | 8671 Ccdc102a      |
| ENSMUSG00000057378 | 8672 Ryr3          |
| ENSMUSG00000103766 | 8673 Gm38392       |
| ENSMUSG00000036298 | 8674 Slc2a13       |
| ENSMUSG00000000869 | 8675 Il4           |
| ENSMUSG00000034488 | 8676 Edil3         |
| ENSMUSG00000031791 | 8677 Tmem38a       |
| ENSMUSG00000043510 | 8678 Hscb          |
| ENSMUSG00000068270 | 8679 Shroom4       |
| ENSMUSG00000039208 | 8680 Metrnl        |
| ENSMUSG00000034820 | 8681 Cpsf7         |
| ENSMUSG00000040729 | 8682 Cep126        |
| ENSMUSG00000058454 | 8683 Dhcr7         |
| ENSMUSG00000031668 | 8684 Eif2ak3       |
| ENSMUSG00000044674 | 8685 Fzd1          |
| ENSMUSG00000024301 | 8686 Kifc5b        |
| ENSMUSG00000058492 | 8687 Scp2-ps2      |
| ENSMUSG00000014039 | 8688 Prdm15        |
| ENSMUSG00000048732 | 8689 Kihl11        |
| ENSMUSG00000086363 | 8690 A330102I10Rik |
| ENSMUSG00000021466 | 8691 Ptch1         |
| ENSMUSG00000022074 | 8692 Tnfrsf10b     |

|                    |                    |
|--------------------|--------------------|
| ENSMUSG00000032077 | 8693 Bud13         |
| ENSMUSG00000044080 | 8694 S100a1        |
| ENSMUSG00000073771 | 8695 Btbd19        |
| ENSMUSG00000064105 | 8696 Cnm2          |
| ENSMUSG00000085452 | 8697 4930554G24Rik |
| ENSMUSG00000027854 | 8698 Sike1         |
| ENSMUSG00000035064 | 8699 Eef2k         |
| ENSMUSG00000107476 | 8700 Zfp862-ps     |
| ENSMUSG00000025235 | 8701 Bbs4          |
| ENSMUSG00000021763 | 8702 BC067074      |
| ENSMUSG00000000794 | 8703 Kcnn3         |
| ENSMUSG00000054459 | 8704 Vsnl1         |
| ENSMUSG00000036686 | 8705 Cc2d1a        |
| ENSMUSG00000095690 | 8706 Rab11b-ps2    |
| ENSMUSG00000056666 | 8707 Retsat        |
| ENSMUSG00000034247 | 8708 Plekhm1       |
| ENSMUSG00000051278 | 8709 Zgrf1         |
| ENSMUSG00000045932 | 8710 Ifit2         |
| ENSMUSG00000032827 | 8711 Ppp1r9a       |
| ENSMUSG00000019194 | 8712 Scn1b         |
| ENSMUSG00000091722 | 8713 Siah3         |
| ENSMUSG00000049583 | 8714 Grm5          |
| ENSMUSG00000029208 | 8715 Guf1          |
| ENSMUSG00000039801 | 8716 2410089E03Rik |
| ENSMUSG00000042523 | 8717 Dnal1         |
| ENSMUSG00000027217 | 8718 Tspan18       |
| ENSMUSG00000061286 | 8719 Exosc5        |
| ENSMUSG00000040699 | 8720 Limd2         |
| ENSMUSG00000033068 | 8721 Entpd6        |
| ENSMUSG00000028696 | 8722 Ipp           |
| ENSMUSG00000026058 | 8723 Khdrbs2       |
| ENSMUSG00000024993 | 8724 Fam45a        |
| ENSMUSG00000091811 | 8725 Inafm1        |
| ENSMUSG00000021253 | 8726 Tgfb3         |
| ENSMUSG00000024592 | 8727 C330018D20Rik |
| ENSMUSG00000040370 | 8728 Lym5          |
| ENSMUSG00000039055 | 8729 Eme1          |
| ENSMUSG00000047789 | 8730 Slc38a9       |
| ENSMUSG00000040883 | 8731 Tmem205       |
| ENSMUSG00000063362 | 8732 Alg11         |
| ENSMUSG00000051177 | 8733 Plcb1         |
| ENSMUSG00000087010 | 8734 1700041M05Rik |



|                    |                    |
|--------------------|--------------------|
| ENSMUSG00000020070 | 8735 Rufy2         |
| ENSMUSG00000020672 | 8736 Sntg2         |
| ENSMUSG00000020605 | 8737 Hs1bp3        |
| ENSMUSG00000071266 | 8738 Zfp946        |
| ENSMUSG00000053166 | 8739 Cdh22         |
| ENSMUSG00000024191 | 8740 Bnip1         |
| ENSMUSG00000060002 | 8741 Chpt1         |
| ENSMUSG00000003420 | 8742 Fcgrt         |
| ENSMUSG00000025047 | 8743 Pdc11         |
| ENSMUSG00000002076 | 8744 Hsf2bp        |
| ENSMUSG00000051339 | 8745 2900026A02Rik |
| ENSMUSG00000066880 | 8746 Zfp617        |
| ENSMUSG00000033430 | 8747 Terf2ip       |
| ENSMUSG00000046591 | 8748 Ticrr         |
| ENSMUSG00000087396 | 8749 4933407K13Rik |
| ENSMUSG00000042757 | 8750 Tmem108       |
| ENSMUSG00000081413 | 8751 Gm14088       |
| ENSMUSG00000032763 | 8752 Ilvbl         |
| ENSMUSG00000060988 | 8753 Galnt13       |
| ENSMUSG00000057342 | 8754 Sphk2         |
| ENSMUSG00000041115 | 8755 Iqsec2        |
| ENSMUSG00000009596 | 8756 Taf7l         |
| ENSMUSG00000031166 | 8757 Wdr13         |
| ENSMUSG00000083294 | 8758 Gm14957       |
| ENSMUSG00000027222 | 8759 Pex16         |
| ENSMUSG00000045435 | 8760 Tmem60        |
| ENSMUSG00000014773 | 8761 Dll1          |
| ENSMUSG00000068264 | 8762 Ap5s1         |
| ENSMUSG00000053702 | 8763 Neb1          |
| ENSMUSG00000085911 | 8764 Gm14061       |
| ENSMUSG00000020057 | 8765 Dram1         |
| ENSMUSG00000037339 | 8766 Fam53a        |
| ENSMUSG00000027459 | 8767 Fam110a       |
| ENSMUSG00000022526 | 8768 Zfp251        |
| ENSMUSG00000068206 | 8769 Pick1         |
| ENSMUSG00000051910 | 8770 Sox6          |
| ENSMUSG00000039109 | 8771 F13a1         |
| ENSMUSG00000107092 | 8772 Gm7993        |
| ENSMUSG00000027236 | 8773 Eif3j1        |
| ENSMUSG00000087579 | 8774 1500017E21Rik |
| ENSMUSG00000006386 | 8775 Tek           |
| ENSMUSG00000026213 | 8776 Stk11ip       |

|                    |                    |
|--------------------|--------------------|
| ENSMUSG00000056429 | 8777 Tgoln1        |
| ENSMUSG00000040195 | 8778 Tmem194       |
| ENSMUSG00000067189 | 8779 Gm7335        |
| ENSMUSG00000020696 | 8780 Rffl          |
| ENSMUSG00000062284 | 8781 Gm6030        |
| ENSMUSG00000028096 | 8782 Gpr89         |
| ENSMUSG00000030747 | 8783 Dgat2         |
| ENSMUSG00000034083 | 8784 Ccdc174       |
| ENSMUSG00000036466 | 8785 Megf11        |
| ENSMUSG00000036557 | 8786 1700011E24Rik |
| ENSMUSG00000028385 | 8787 Snx30         |
| ENSMUSG00000033434 | 8788 Gtpbp6        |
| ENSMUSG00000002550 | 8789 Uck1          |
| ENSMUSG00000038375 | 8790 Trp53inp2     |
| ENSMUSG00000084797 | 8791 Gm14321       |
| ENSMUSG00000045140 | 8792 Pigw          |
| ENSMUSG00000033953 | 8793 Ppp3r1        |
| ENSMUSG00000029624 | 8794 Ptcd1         |
| ENSMUSG00000031938 | 8795 4931406C07Rik |
| ENSMUSG00000029022 | 8796 Miip          |
| ENSMUSG00000032251 | 8797 Irak1bp1      |
| ENSMUSG00000097009 | 8798 Gm26861       |
| ENSMUSG00000075040 | 8799 Zfp408        |
| ENSMUSG00000015942 | 8800 Gtf2ird2      |
| ENSMUSG00000097852 | 8801 4933405D12Rik |
| ENSMUSG00000054484 | 8802 Tmem62        |
| ENSMUSG00000053134 | 8803 Supt7l        |
| ENSMUSG00000033965 | 8804 Slc16a2       |
| ENSMUSG00000075054 | 8805 Yae1d1        |
| ENSMUSG00000044702 | 8806 Palb2         |
| ENSMUSG00000064360 | 8807 mt-Nd3        |
| ENSMUSG00000037455 | 8808 Slc18b1       |
| ENSMUSG00000047205 | 8809 Dusp18        |
| ENSMUSG00000039684 | 8810 Gm5422        |
| ENSMUSG00000045071 | 8811 E130308A19Rik |
| ENSMUSG00000050490 | 8812 Gm8394        |
| ENSMUSG00000026723 | 8813 Trdmt1        |
| ENSMUSG00000052031 | 8814 Tagap1        |
| ENSMUSG00000015536 | 8815 Mocs2         |
| ENSMUSG00000033658 | 8816 Ddx19b        |
| ENSMUSG00000019088 | 8817 Dnase1l1      |
| ENSMUSG00000034653 | 8818 Ythdc2        |

|                    |                    |
|--------------------|--------------------|
| ENSMUSG00000085561 | 8819 1700046C09Rik |
| ENSMUSG00000031486 | 8820 Adgra2        |
| ENSMUSG00000025889 | 8821 Snca          |
| ENSMUSG00000018774 | 8822 Cd68          |
| ENSMUSG00000009670 | 8823 Tex11         |
| ENSMUSG00000030008 | 8824 Pradc1        |
| ENSMUSG00000019866 | 8825 Aim1          |
| ENSMUSG00000023892 | 8826 Zfp51         |
| ENSMUSG00000108030 | 8827 RP23-374K9.4  |
| ENSMUSG00000038987 | 8828 1700019L03Rik |
| ENSMUSG00000081895 | 8829 Rpl17-ps10    |
| ENSMUSG00000010751 | 8830 Tnfrsf22      |
| ENSMUSG00000022799 | 8831 Arhgap31      |
| ENSMUSG00000052911 | 8832 Lamb2         |
| ENSMUSG00000027171 | 8833 Prrg4         |
| ENSMUSG00000033253 | 8834 Szt2          |
| ENSMUSG00000087060 | 8835 Eldr          |
| ENSMUSG00000038515 | 8836 Grtp1         |
| ENSMUSG00000079414 | 8837 Gm11110       |
| ENSMUSG00000018796 | 8838 Acsl1         |
| ENSMUSG00000086483 | 8839 8030443G20Rik |
| ENSMUSG00000031755 | 8840 Bbs2          |
| ENSMUSG00000032018 | 8841 Sc5d          |
| ENSMUSG00000032743 | 8842 D430042O09Rik |
| ENSMUSG00000056412 | 8843 Gm12396       |
| ENSMUSG00000108608 | 8844 RP23-412J12.1 |
| ENSMUSG00000022184 | 8845 Fbxo4         |
| ENSMUSG00000053714 | 8846 4732471J01Rik |
| ENSMUSG00000035572 | 8847 Dcaf10        |
| ENSMUSG00000028597 | 8848 Gpx7          |
| ENSMUSG00000022375 | 8849 Lrrc6         |
| ENSMUSG00000048439 | 8850 Nupl2         |
| ENSMUSG00000022311 | 8851 Csmd3         |
| ENSMUSG00000018199 | 8852 Trove2        |
| ENSMUSG00000028890 | 8853 Mtf1          |
| ENSMUSG00000021226 | 8854 Acot2         |
| ENSMUSG00000043773 | 8855 1700048O20Rik |
| ENSMUSG00000027555 | 8856 Car13         |
| ENSMUSG00000040666 | 8857 Sh3bgr        |
| ENSMUSG00000041440 | 8858 Gk5           |
| ENSMUSG00000070327 | 8859 Rnf213        |
| ENSMUSG00000026113 | 8860 Inpp4a        |

|                    |                    |
|--------------------|--------------------|
| ENSMUSG00000023886 | 8861 Smoc2         |
| ENSMUSG00000030922 | 8862 Lyrn1         |
| ENSMUSG00000099719 | 8863 Gm28802       |
| ENSMUSG00000026853 | 8864 Crat          |
| ENSMUSG00000061175 | 8865 Fnip2         |
| ENSMUSG00000022848 | 8866 Dirc2         |
| ENSMUSG00000005107 | 8867 Slc2a9        |
| ENSMUSG00000062151 | 8868 Unc13c        |
| ENSMUSG00000070280 | 8869 Slc22a14      |
| ENSMUSG00000027811 | 8870 4930579G24Rik |
| ENSMUSG00000003308 | 8871 Keap1         |
| ENSMUSG00000035967 | 8872 Ddx26b        |
| ENSMUSG00000083477 | 8873 Gm5555        |
| ENSMUSG00000044550 | 8874 Tceal3        |
| ENSMUSG00000027654 | 8875 Fam83d        |
| ENSMUSG00000001143 | 8876 Lman2l        |
| ENSMUSG00000022973 | 8877 Synj1         |
| ENSMUSG00000057329 | 8878 Bcl2          |
| ENSMUSG00000026123 | 8879 Plekha2       |
| ENSMUSG00000046442 | 8880 Ppm1e         |
| ENSMUSG00000041220 | 8881 Elovl6        |
| ENSMUSG00000060376 | 8882 Bckdha        |
| ENSMUSG00000077192 | 8883 Snora17       |
| ENSMUSG00000052726 | 8884 Kcnt2         |
| ENSMUSG00000062753 | 8885 Al413582      |
| ENSMUSG00000024736 | 8886 Tmem132a      |
| ENSMUSG00000062198 | 8887 2700097O09Rik |
| ENSMUSG00000035437 | 8888 Rabgap1       |
| ENSMUSG00000026786 | 8889 Apbb1ip       |
| ENSMUSG00000036948 | 8890 BC037034      |
| ENSMUSG00000050271 | 8891 D8Ertd82e     |
| ENSMUSG00000041037 | 8892 Irgq          |
| ENSMUSG00000021798 | 8893 Ldb3          |
| ENSMUSG00000029381 | 8894 Shroom3       |
| ENSMUSG00000063146 | 8895 Clip2         |
| ENSMUSG00000060275 | 8896 Nrg2          |
| ENSMUSG00000100484 | 8897 Gm7133        |
| ENSMUSG00000022849 | 8898 Hspbap1       |
| ENSMUSG00000034463 | 8899 Scara3        |
| ENSMUSG00000042200 | 8900 Cdrt4         |
| ENSMUSG00000028139 | 8901 Riiad1        |
| ENSMUSG00000019124 | 8902 Scrn1         |

|                    |                    |
|--------------------|--------------------|
| ENSMUSG00000025049 | 8903 Taf5          |
| ENSMUSG00000032648 | 8904 Pygm          |
| ENSMUSG00000000266 | 8905 Mid2          |
| ENSMUSG00000023051 | 8906 Tarbp2        |
| ENSMUSG00000037295 | 8907 Ldlrap1       |
| ENSMUSG00000041594 | 8908 Tmtc4         |
| ENSMUSG00000059183 | 8909 Mtfmt         |
| ENSMUSG00000004896 | 8910 Rrnad1        |
| ENSMUSG00000066637 | 8911 Ttc32         |
| ENSMUSG00000044345 | 8912 Marveld1      |
| ENSMUSG00000035473 | 8913 Galm          |
| ENSMUSG00000032370 | 8914 Lactb         |
| ENSMUSG00000003581 | 8915 Rnf215        |
| ENSMUSG00000025036 | 8916 Sfxn2         |
| ENSMUSG00000093401 | 8917 Vmn2r-ps126   |
| ENSMUSG00000034057 | 8918 Myrfl         |
| ENSMUSG00000004565 | 8919 Pnpla6        |
| ENSMUSG00000085025 | 8920 Gm13715       |
| ENSMUSG00000086686 | 8921 F630206G17Rik |
| ENSMUSG00000021963 | 8922 Sap18         |
| ENSMUSG00000046574 | 8923 Prr12         |
| ENSMUSG00000026027 | 8924 Stradb        |
| ENSMUSG00000022494 | 8925 Shisa9        |
| ENSMUSG00000035394 | 8926 Cfap53        |
| ENSMUSG00000098004 | 8927 Gm27027       |
| ENSMUSG00000001270 | 8928 Ckb           |
| ENSMUSG00000028629 | 8929 Exo5          |
| ENSMUSG00000000120 | 8930 Ngfr          |
| ENSMUSG00000017491 | 8931 Rarb          |
| ENSMUSG00000054855 | 8932 Rnd1          |
| ENSMUSG00000053825 | 8933 Ppfia2        |
| ENSMUSG00000025314 | 8934 Ptprij        |
| ENSMUSG00000038763 | 8935 Alpk3         |
| ENSMUSG00000027952 | 8936 Pmvk          |
| ENSMUSG00000054942 | 8937 Fam73a        |
| ENSMUSG00000021360 | 8938 Gcnt2         |
| ENSMUSG00000019831 | 8939 Wasf1         |
| ENSMUSG00000033055 | 8940 Ankrd54       |
| ENSMUSG00000054021 | 8941 Sirt5         |
| ENSMUSG00000091002 | 8942 Tcerg1l       |
| ENSMUSG00000075312 | 8943 Gm13597       |
| ENSMUSG00000031916 | 8944 Cog8          |

|                    |                    |
|--------------------|--------------------|
| ENSMUSG00000060862 | 8945 Zbtb40        |
| ENSMUSG00000080705 | 8946 Sult2a-ps4    |
| ENSMUSG00000035164 | 8947 Zc3h12c       |
| ENSMUSG00000050783 | 8948 Htr1f         |
| ENSMUSG00000029196 | 8949 Tada2b        |
| ENSMUSG00000031758 | 8950 Cdyl2         |
| ENSMUSG00000032602 | 8951 Slc25a20      |
| ENSMUSG00000063558 | 8952 Aox1          |
| ENSMUSG00000008226 | 8953 Scrn3         |
| ENSMUSG00000028331 | 8954 5830415F09Rik |
| ENSMUSG00000027533 | 8955 Fabp5         |
| ENSMUSG00000028973 | 8956 Abcb8         |
| ENSMUSG00000071691 | 8957 Gm960         |
| ENSMUSG00000026764 | 8958 Kif5c         |
| ENSMUSG00000049922 | 8959 Slc35c1       |
| ENSMUSG00000056383 | 8960 Al987944      |
| ENSMUSG00000001034 | 8961 Mapk7         |
| ENSMUSG00000020156 | 8962 Mum1          |
| ENSMUSG00000024027 | 8963 Glp1r         |
| ENSMUSG00000058869 | 8964 Gm4832        |
| ENSMUSG00000026158 | 8965 Ogfrl1        |
| ENSMUSG00000072980 | 8966 Oip5          |
| ENSMUSG00000029636 | 8967 Wasf3         |
| ENSMUSG00000086277 | 8968 4930558K02Rik |
| ENSMUSG00000032041 | 8969 Tirap         |
| ENSMUSG00000027676 | 8970 Ccdc39        |
| ENSMUSG00000040452 | 8971 Cdh12         |
| ENSMUSG00000097789 | 8972 Gm2115        |
| ENSMUSG00000026932 | 8973 Nacc2         |
| ENSMUSG00000066441 | 8974 Rdh11         |
| ENSMUSG00000049300 | 8975 Prmt6         |
| ENSMUSG00000051184 | 8976 Zfp524        |
| ENSMUSG00000031986 | 8977 Sprtn         |
| ENSMUSG00000033102 | 8978 Cdc14b        |
| ENSMUSG00000087177 | 8979 E130307A14Rik |
| ENSMUSG00000024169 | 8980 Ift140        |
| ENSMUSG00000074981 | 8981 Dcdc5         |
| ENSMUSG00000055675 | 8982 Kbtbd11       |
| ENSMUSG00000055385 | 8983 Rnf212        |
| ENSMUSG00000055407 | 8984 Map6          |
| ENSMUSG00000051817 | 8985 Sox12         |
| ENSMUSG00000024339 | 8986 Tap2          |

|                    |                    |
|--------------------|--------------------|
| ENSMUSG00000086141 | 8987 9030622O22Rik |
| ENSMUSG00000060377 | 8988 Rpl36a-ps1    |
| ENSMUSG00000039983 | 8989 Ccdc32        |
| ENSMUSG00000026709 | 8990 Dars2         |
| ENSMUSG00000034936 | 8991 Arl4d         |
| ENSMUSG00000018334 | 8992 Ksr1          |
| ENSMUSG00000063011 | 8993 Msln          |
| ENSMUSG00000019726 | 8994 Lyst          |
| ENSMUSG00000024654 | 8995 Asrgl1        |
| ENSMUSG00000060647 | 8996 Gm7099        |
| ENSMUSG00000044086 | 8997 Lmod3         |
| ENSMUSG00000060860 | 8998 Ube2s         |
| ENSMUSG00000026975 | 8999 Dph7          |
| ENSMUSG00000086592 | 9000 Gm12682       |
| ENSMUSG00000042787 | 9001 Exog          |
| ENSMUSG00000018102 | 9002 Hist1h2bc     |
| ENSMUSG00000091562 | 9003 Gm9581        |
| ENSMUSG00000040490 | 9004 Lrfn2         |
| ENSMUSG00000044328 | 9005 Trp53i13      |
| ENSMUSG00000057716 | 9006 Tmem178b      |
| ENSMUSG00000085024 | 9007 C230035I16Rik |
| ENSMUSG00000034656 | 9008 Cacna1a       |
| ENSMUSG00000032840 | 9009 2410131K14Rik |
| ENSMUSG00000037466 | 9010 4930427A07Rik |
| ENSMUSG00000019883 | 9011 Echdc1        |
| ENSMUSG00000087658 | 9012 Hotairm1      |
| ENSMUSG00000021066 | 9013 At11          |
| ENSMUSG00000052763 | 9014 Zfp212        |
| ENSMUSG00000043531 | 9015 Sorcs1        |
| ENSMUSG00000082791 | 9016 Gm4875        |
| ENSMUSG00000084902 | 9017 Gm281         |
| ENSMUSG00000097279 | 9018 Gm5106        |
| ENSMUSG00000068758 | 9019 Il3ra         |
| ENSMUSG00000056708 | 9020 Ier5          |
| ENSMUSG00000002820 | 9021 Atg4d         |
| ENSMUSG00000022788 | 9022 Fgd4          |
| ENSMUSG00000023990 | 9023 Tfeb          |
| ENSMUSG00000101104 | 9024 Gm29247       |
| ENSMUSG00000030979 | 9025 Uros          |
| ENSMUSG00000092032 | 9026 Vmn2r59       |
| ENSMUSG00000085909 | 9027 Gm11846       |
| ENSMUSG00000068284 | 9028 Gm608         |

|                    |                    |
|--------------------|--------------------|
| ENSMUSG00000027257 | 9029 Pacsin3       |
| ENSMUSG00000052056 | 9030 Zfp217        |
| ENSMUSG00000035439 | 9031 Haus8         |
| ENSMUSG00000019826 | 9032 Zbtb24        |
| ENSMUSG00000045237 | 9033 1110012L19Rik |
| ENSMUSG00000038141 | 9034 Tmem181a      |
| ENSMUSG00000038893 | 9035 Fam117a       |
| ENSMUSG00000090733 | 9036 Rps27         |
| ENSMUSG00000025241 | 9037 Fyco1         |
| ENSMUSG00000027276 | 9038 Jag1          |
| ENSMUSG00000100548 | 9039 Gm29585       |
| ENSMUSG00000033983 | 9040 Coil          |
| ENSMUSG00000100301 | 9041 6030407O03Rik |
| ENSMUSG00000030729 | 9042 Pgm2l1        |
| ENSMUSG00000037526 | 9043 Atg14         |
| ENSMUSG00000020956 | 9044 Dtd2          |
| ENSMUSG00000027079 | 9045 Clp1          |
| ENSMUSG00000041482 | 9046 Piezo2        |
| ENSMUSG00000037773 | 9047 Pced1a        |
| ENSMUSG00000031381 | 9048 Piga          |
| ENSMUSG00000041596 | 9049 Nlrp5-ps      |
| ENSMUSG00000057897 | 9050 Camk2b        |
| ENSMUSG00000100120 | 9051 Gm553         |
| ENSMUSG00000054720 | 9052 Lrrc8c        |
| ENSMUSG00000031732 | 9053 Phlpp2        |
| ENSMUSG00000028300 | 9054 3110043O21Rik |
| ENSMUSG00000030553 | 9055 Pgpep1l       |
| ENSMUSG00000031438 | 9056 Rnf128        |
| ENSMUSG00000024968 | 9057 Rcor2         |
| ENSMUSG00000078862 | 9058 Gm14326       |
| ENSMUSG00000070695 | 9059 Cntnap5a      |
| ENSMUSG00000057933 | 9060 Gsta2         |
| ENSMUSG00000086665 | 9061 Gm13067       |
| ENSMUSG00000027341 | 9062 Tmem230       |
| ENSMUSG00000030722 | 9063 Nfatc2ip      |
| ENSMUSG00000045795 | 9064 Whamm         |
| ENSMUSG00000019518 | 9065 Ap4m1         |
| ENSMUSG00000006800 | 9066 Sulf2         |
| ENSMUSG00000045967 | 9067 Gpr158        |
| ENSMUSG00000026062 | 9068 Slc9a2        |
| ENSMUSG00000079283 | 9069 2310009B15Rik |
| ENSMUSG00000027115 | 9070 Kif18a        |



|                    |              |
|--------------------|--------------|
| ENSMUSG00000048402 | 9071 Gli2    |
| ENSMUSG00000055240 | 9072 Zfp101  |
| ENSMUSG00000006463 | 9073 Zdhhc24 |
| ENSMUSG00000024325 | 9074 Ring1   |
| ENSMUSG00000047388 | 9075 Atmin   |
| ENSMUSG00000030319 | 9076 Cand2   |
| ENSMUSG00000065444 | 9077 Mir27a  |
| ENSMUSG00000034330 | 9078 Plcg2   |
| ENSMUSG00000037997 | 9079 Parp11  |
| ENSMUSG00000030871 | 9080 Ears2   |
| ENSMUSG00000005320 | 9081 Fgfr4   |
| ENSMUSG00000026620 | 9082 Mark1   |
| ENSMUSG00000048720 | 9083 Tbc1d12 |
| ENSMUSG00000029033 | 9084 Acap3   |
| ENSMUSG00000036959 | 9085 Bcor1   |
| ENSMUSG00000025357 | 9086 Dgka    |
| ENSMUSG00000038816 | 9087 Cttnal1 |
| ENSMUSG00000063297 | 9088 Luzp2   |
| ENSMUSG00000043065 | 9089 Spice1  |
| ENSMUSG00000020921 | 9090 Tmem101 |
| ENSMUSG00000097052 | 9091 Snhg7   |
| ENSMUSG00000070811 | 9092 Sult2a2 |
| ENSMUSG00000028974 | 9093 Dffa    |
| ENSMUSG00000022130 | 9094 Tgds    |
| ENSMUSG00000015659 | 9095 Serac1  |
| ENSMUSG00000100037 | 9096 Gm29103 |
| ENSMUSG00000048186 | 9097 Bend7   |
| ENSMUSG00000018893 | 9098 Mb      |
| ENSMUSG00000097193 | 9099 Gm26664 |
| ENSMUSG00000038764 | 9100 Ptpn3   |
| ENSMUSG00000052631 | 9101 Sh2d6   |
| ENSMUSG00000054934 | 9102 Kcnmb4  |
| ENSMUSG00000029089 | 9103 Pacrgl  |
| ENSMUSG00000020834 | 9104 Dhrr13  |
| ENSMUSG00000034848 | 9105 Ttc21b  |
| ENSMUSG00000087381 | 9106 Gm16008 |
| ENSMUSG00000058402 | 9107 Zfp420  |
| ENSMUSG00000023249 | 9108 Parp3   |
| ENSMUSG00000027239 | 9109 Mdk     |
| ENSMUSG00000001802 | 9110 Lrp3    |
| ENSMUSG00000019791 | 9111 Hint3   |
| ENSMUSG00000024193 | 9112 Phf1    |

|                    |                    |
|--------------------|--------------------|
| ENSMUSG00000056004 | 9113 9330182L06Rik |
| ENSMUSG00000097908 | 9114 4933404O12Rik |
| ENSMUSG00000059316 | 9115 Slc27a4       |
| ENSMUSG00000025978 | 9116 Rftn2         |
| ENSMUSG00000031399 | 9117 Fam3a         |
| ENSMUSG00000039611 | 9118 Tmem246       |
| ENSMUSG00000060675 | 9119 Pla2g16       |
| ENSMUSG00000050751 | 9120 Pgbd5         |
| ENSMUSG00000079179 | 9121 Rab10os       |
| ENSMUSG00000107035 | 9122 Ybx1-ps2      |
| ENSMUSG00000035513 | 9123 Ntng2         |
| ENSMUSG00000000708 | 9124 Kat2b         |
| ENSMUSG00000093424 | 9125 6330562C20Rik |
| ENSMUSG00000022321 | 9126 Cdh10         |
| ENSMUSG00000022514 | 9127 Il1rap        |
| ENSMUSG00000001985 | 9128 Grik3         |
| ENSMUSG00000018900 | 9129 Slc22a5       |
| ENSMUSG00000071711 | 9130 Mpst          |
| ENSMUSG00000006127 | 9131 Inpp5k        |
| ENSMUSG00000042744 | 9132 Gm15800       |
| ENSMUSG00000005131 | 9133 4930550C14Rik |
| ENSMUSG00000038576 | 9134 Susd4         |
| ENSMUSG00000041147 | 9135 Brca2         |
| ENSMUSG00000092116 | 9136 Gm10320       |
| ENSMUSG00000028188 | 9137 Spata1        |
| ENSMUSG00000047635 | 9138 2810006K23Rik |
| ENSMUSG00000082978 | 9139 Rpsa-ps11     |
| ENSMUSG00000020747 | 9140 2310067B10Rik |
| ENSMUSG00000050229 | 9141 Pigm          |
| ENSMUSG00000083878 | 9142 Gm12034       |
| ENSMUSG00000087365 | 9143 C430049B03Rik |
| ENSMUSG00000044117 | 9144 2900011O08Rik |
| ENSMUSG00000054770 | 9145 Kctd18        |
| ENSMUSG00000060090 | 9146 Rp2           |
| ENSMUSG00000038174 | 9147 Fam126b       |
| ENSMUSG00000029312 | 9148 Klhl8         |
| ENSMUSG00000027088 | 9149 Phospho2      |
| ENSMUSG00000022510 | 9150 Trp63         |
| ENSMUSG00000031066 | 9151 Usp11         |
| ENSMUSG00000026197 | 9152 Zfand2b       |
| ENSMUSG00000052137 | 9153 Rbm12b2       |
| ENSMUSG00000085867 | 9154 Gm5834        |

|                     |                    |
|---------------------|--------------------|
| ENSMUSG00000026389  | 9155 Steap3        |
| ENSMUSG00000004561  | 9156 Mettl17       |
| ENSMUSG00000030621  | 9157 Me3           |
| ENSMUSG000000105943 | 9158 Gm2965        |
| ENSMUSG00000041429  | 9159 Nthl1         |
| ENSMUSG00000022621  | 9160 Rabl2         |
| ENSMUSG00000020783  | 9161 1200014J11Rik |
| ENSMUSG00000087011  | 9162 Gm12930       |
| ENSMUSG00000023186  | 9163 Vwa5a         |
| ENSMUSG00000035183  | 9164 Slc24a5       |
| ENSMUSG00000039701  | 9165 Usp53         |
| ENSMUSG00000034858  | 9166 Fam214a       |
| ENSMUSG00000032261  | 9167 Sh3bgrl2      |
| ENSMUSG00000039057  | 9168 Myo16         |
| ENSMUSG00000022702  | 9169 Hira          |
| ENSMUSG00000078492  | 9170 1700045H11Rik |
| ENSMUSG00000048047  | 9171 Zbtb33        |
| ENSMUSG000000100371 | 9172 Gm29669       |
| ENSMUSG00000016239  | 9173 Lonrf3        |
| ENSMUSG00000005949  | 9174 Ctns          |
| ENSMUSG00000057219  | 9175 Armc7         |
| ENSMUSG00000077614  | 9176 Gm25500       |
| ENSMUSG00000033015  | 9177 4933427E13Rik |
| ENSMUSG000000105376 | 9178 Gm42487       |
| ENSMUSG00000021236  | 9179 Entpd5        |
| ENSMUSG00000041199  | 9180 Rpusd1        |
| ENSMUSG00000050002  | 9181 Idnk          |
| ENSMUSG00000034216  | 9182 Vps18         |
| ENSMUSG00000040007  | 9183 Bahd1         |
| ENSMUSG00000033454  | 9184 Zbtb1         |
| ENSMUSG00000026179  | 9185 Pnkd          |
| ENSMUSG00000029474  | 9186 Rnf34         |
| ENSMUSG00000063564  | 9187 Col23a1       |
| ENSMUSG00000085143  | 9188 Gm11520       |
| ENSMUSG00000079593  | 9189 Gm14597       |
| ENSMUSG00000028755  | 9190 Cda           |
| ENSMUSG00000027778  | 9191 lft80         |
| ENSMUSG00000042743  | 9192 Sgtb          |
| ENSMUSG00000097402  | 9193 Gm17399       |
| ENSMUSG00000036885  | 9194 Arhgef26      |
| ENSMUSG00000048677  | 9195 Tpcn2         |
| ENSMUSG00000085666  | 9196 Gm9855        |

|                    |                    |
|--------------------|--------------------|
| ENSMUSG00000074264 | 9197 Amy1          |
| ENSMUSG00000006457 | 9198 Actn3         |
| ENSMUSG00000020160 | 9199 Meis1         |
| ENSMUSG00000038497 | 9200 Tmco3         |
| ENSMUSG00000026803 | 9201 Ttf1          |
| ENSMUSG00000100550 | 9202 2310039L15Rik |
| ENSMUSG00000023967 | 9203 Mrps18a       |
| ENSMUSG00000030732 | 9204 Chrdl2        |
| ENSMUSG00000039908 | 9205 Slc26a11      |
| ENSMUSG00000096938 | 9206 9530052E02Rik |
| ENSMUSG00000040302 | 9207 Rbm48         |
| ENSMUSG00000028360 | 9208 Slc44a5       |
| ENSMUSG00000063235 | 9209 Ptpmt1        |
| ENSMUSG00000028599 | 9210 Tnfrsf1b      |
| ENSMUSG00000016520 | 9211 Lnx2          |
| ENSMUSG00000038055 | 9212 Dexi          |
| ENSMUSG00000040321 | 9213 Zfp770        |
| ENSMUSG00000025188 | 9214 Hps1          |
| ENSMUSG00000097797 | 9215 Gm26901       |
| ENSMUSG00000049044 | 9216 Rapgef4       |
| ENSMUSG00000074165 | 9217 Zfp788        |
| ENSMUSG00000036002 | 9218 Fam214b       |
| ENSMUSG00000042308 | 9219 Setd1a        |
| ENSMUSG00000055884 | 9220 Fancm         |
| ENSMUSG00000108622 | 9221 RP23-184D18.8 |
| ENSMUSG00000038086 | 9222 Hspb2         |
| ENSMUSG00000059920 | 9223 4930453N24Rik |
| ENSMUSG00000020061 | 9224 Mybpc1        |
| ENSMUSG00000028468 | 9225 Rgp1          |
| ENSMUSG00000052544 | 9226 St6galnac3    |
| ENSMUSG00000019718 | 9227 L3hypdh       |
| ENSMUSG00000104232 | 9228 Gm37590       |
| ENSMUSG00000053600 | 9229 Zfp472        |
| ENSMUSG00000044997 | 9230 E130304I02Rik |
| ENSMUSG00000035615 | 9231 Frmpd1        |
| ENSMUSG00000027438 | 9232 Napb          |
| ENSMUSG00000034532 | 9233 Fbxo16        |
| ENSMUSG00000032788 | 9234 Pdxk          |
| ENSMUSG00000038028 | 9235 Tigar         |
| ENSMUSG00000024079 | 9236 Eif2ak2       |
| ENSMUSG00000037999 | 9237 Arap2         |
| ENSMUSG00000063450 | 9238 Syne2         |

|                    |                    |
|--------------------|--------------------|
| ENSMUSG00000090110 | 9239 Cmc4          |
| ENSMUSG00000062694 | 9240 Cav3          |
| ENSMUSG00000099597 | 9241 Gm28933       |
| ENSMUSG00000037139 | 9242 Myom3         |
| ENSMUSG00000044339 | 9243 Alkbh2        |
| ENSMUSG00000026189 | 9244 Pecr          |
| ENSMUSG00000040189 | 9245 Ccdc114       |
| ENSMUSG00000100975 | 9246 Gm28875       |
| ENSMUSG00000037730 | 9247 Mynn          |
| ENSMUSG00000034673 | 9248 Pbx2          |
| ENSMUSG00000022014 | 9249 Epsti1        |
| ENSMUSG00000080242 | 9250 Gm15487       |
| ENSMUSG00000001138 | 9251 Cnm3          |
| ENSMUSG00000001123 | 9252 Lgals9        |
| ENSMUSG00000086899 | 9253 1600002D24Rik |
| ENSMUSG00000000282 | 9254 Mnt           |
| ENSMUSG00000086502 | 9255 B130055M24Rik |
| ENSMUSG00000024781 | 9256 Lipa          |
| ENSMUSG00000021098 | 9257 4930447C04Rik |
| ENSMUSG00000029059 | 9258 Fam213b       |
| ENSMUSG00000039835 | 9259 Nhsl1         |
| ENSMUSG00000058254 | 9260 Tspan7        |
| ENSMUSG00000032198 | 9261 Dock6         |
| ENSMUSG00000059455 | 9262 Plac8l1       |
| ENSMUSG00000030814 | 9263 Bcl7c         |
| ENSMUSG00000105320 | 9264 Gm43016       |
| ENSMUSG00000074829 | 9265 2010315B03Rik |
| ENSMUSG00000046500 | 9266 Fam19a4       |
| ENSMUSG00000032487 | 9267 Ptgs2         |
| ENSMUSG00000006395 | 9268 Hyi           |
| ENSMUSG00000032363 | 9269 Adamts7       |
| ENSMUSG00000046185 | 9270 Zfp84         |
| ENSMUSG00000005142 | 9271 Man2b1        |
| ENSMUSG00000066042 | 9272 Med18         |
| ENSMUSG00000025983 | 9273 Ccdc150       |
| ENSMUSG00000028211 | 9274 Trp53inp1     |
| ENSMUSG00000103433 | 9275 Gm2272        |
| ENSMUSG00000097168 | 9276 C230088H06Rik |
| ENSMUSG00000016984 | 9277 Etaa1         |
| ENSMUSG00000022946 | 9278 Dopey2        |
| ENSMUSG00000035840 | 9279 Lysmd3        |
| ENSMUSG00000025010 | 9280 Ccnj          |

|                     |                    |
|---------------------|--------------------|
| ENSMUSG00000003190  | 9281 Bcl2l12       |
| ENSMUSG00000030275  | 9282 Etnk1         |
| ENSMUSG00000050188  | 9283 Lsm10         |
| ENSMUSG000000101447 | 9284 Gm28826       |
| ENSMUSG00000098090  | 9285 2700099C18Rik |
| ENSMUSG00000047747  | 9286 Rnf150        |
| ENSMUSG00000059975  | 9287 Zfp74         |
| ENSMUSG00000074063  | 9288 Osgin1        |
| ENSMUSG00000070044  | 9289 Fam149a       |
| ENSMUSG00000031161  | 9290 Hdac6         |
| ENSMUSG00000087170  | 9291 1700001G01Rik |
| ENSMUSG00000003154  | 9292 Foxj2         |
| ENSMUSG00000000958  | 9293 Slc7a7        |
| ENSMUSG000000104448 | 9294 Gm37256       |
| ENSMUSG00000008540  | 9295 Mgst1         |
| ENSMUSG00000090389  | 9296 Gm7236        |
| ENSMUSG00000033720  | 9297 Sfxn5         |
| ENSMUSG00000022313  | 9298 Utp23         |
| ENSMUSG00000031487  | 9299 Brf2          |
| ENSMUSG00000081153  | 9300 Gm11401       |
| ENSMUSG00000043587  | 9301 Pxylp1        |
| ENSMUSG00000032766  | 9302 Gng11         |
| ENSMUSG00000026774  | 9303 4931423N10Rik |
| ENSMUSG00000095677  | 9304 Dynlt1f       |
| ENSMUSG00000022827  | 9305 Rabl3         |
| ENSMUSG00000002058  | 9306 Unc119        |
| ENSMUSG00000030493  | 9307 Faap24        |
| ENSMUSG00000054715  | 9308 Zscan22       |
| ENSMUSG00000021902  | 9309 Phf7          |
| ENSMUSG00000037685  | 9310 Atp8a1        |
| ENSMUSG00000035653  | 9311 Lfn5          |
| ENSMUSG00000057715  | 9312 A830018L16Rik |
| ENSMUSG00000050777  | 9313 Tmem37        |
| ENSMUSG00000001240  | 9314 Ramp2         |
| ENSMUSG00000087516  | 9315 Tbx3os1       |
| ENSMUSG00000033486  | 9316 Catsper2      |
| ENSMUSG00000038013  | 9317 Wipf2         |
| ENSMUSG00000019763  | 9318 Rmnd1         |
| ENSMUSG00000033526  | 9319 Ppip5k1       |
| ENSMUSG00000019338  | 9320 Zfp687        |
| ENSMUSG00000035245  | 9321 Eogt          |
| ENSMUSG00000046603  | 9322 Tcaim         |

|                    |                    |
|--------------------|--------------------|
| ENSMUSG00000085334 | 9323 Gm12940       |
| ENSMUSG00000027602 | 9324 Map1lc3a      |
| ENSMUSG00000028541 | 9325 B4galt2       |
| ENSMUSG00000000037 | 9326 Scml2         |
| ENSMUSG00000087138 | 9327 Gm15545       |
| ENSMUSG00000020492 | 9328 Ska2          |
| ENSMUSG00000089832 | 9329 Shkbp1        |
| ENSMUSG00000035580 | 9330 Kcnh8         |
| ENSMUSG00000047878 | 9331 A4galt        |
| ENSMUSG00000086917 | 9332 Gm11630       |
| ENSMUSG00000040818 | 9333 Dennd6a       |
| ENSMUSG00000021592 | 9334 Arsk          |
| ENSMUSG00000091387 | 9335 Gcnt4         |
| ENSMUSG00000020883 | 9336 Fbxl20        |
| ENSMUSG00000022701 | 9337 2610015P09Rik |
| ENSMUSG00000031380 | 9338 Figf          |
| ENSMUSG00000051786 | 9339 Tubgcp6       |
| ENSMUSG00000046441 | 9340 Cmtr2         |
| ENSMUSG00000033762 | 9341 Recql4        |
| ENSMUSG00000030222 | 9342 Rerg          |
| ENSMUSG00000027800 | 9343 Tm4sf1        |
| ENSMUSG00000008373 | 9344 Prpf31        |
| ENSMUSG00000031478 | 9345 Nek3          |
| ENSMUSG00000032548 | 9346 Slco2a1       |
| ENSMUSG00000028931 | 9347 Kcnab2        |
| ENSMUSG00000067928 | 9348 Zfp760        |
| ENSMUSG00000015653 | 9349 Steap2        |
| ENSMUSG00000063047 | 9350 Zfp780b       |
| ENSMUSG00000085816 | 9351 Gm13052       |
| ENSMUSG00000023963 | 9352 Cyp39a1       |
| ENSMUSG00000030748 | 9353 Il4ra         |
| ENSMUSG00000040270 | 9354 Bach2         |
| ENSMUSG00000003974 | 9355 Grm3          |
| ENSMUSG00000064798 | 9356 n-R5s193      |
| ENSMUSG00000042453 | 9357 Reln          |
| ENSMUSG00000039824 | 9358 Myl6b         |
| ENSMUSG00000084782 | 9359 Gm11213       |
| ENSMUSG00000004994 | 9360 Ccdc130       |
| ENSMUSG00000031169 | 9361 Porcn         |
| ENSMUSG00000022829 | 9362 Stxbp5l       |
| ENSMUSG00000032567 | 9363 Aste1         |
| ENSMUSG00000020193 | 9364 Zpbp          |

|                    |                    |
|--------------------|--------------------|
| ENSMUSG00000033854 | 9365 Kcnk10        |
| ENSMUSG00000097917 | 9366 Gm26839       |
| ENSMUSG00000021708 | 9367 Rasgrf2       |
| ENSMUSG00000081164 | 9368 Gm8722        |
| ENSMUSG00000043760 | 9369 Pkhd1         |
| ENSMUSG00000018820 | 9370 Zfyve27       |
| ENSMUSG00000041688 | 9371 Amot          |
| ENSMUSG00000026972 | 9372 Arrdc1        |
| ENSMUSG00000030051 | 9373 Ap1f          |
| ENSMUSG00000040701 | 9374 Ap1g2         |
| ENSMUSG00000037613 | 9375 Tnfrsf23      |
| ENSMUSG00000047547 | 9376 Cltb          |
| ENSMUSG00000099401 | 9377 Gm28375       |
| ENSMUSG00000043439 | 9378 E130012A19Rik |
| ENSMUSG00000000531 | 9379 Grasp         |
| ENSMUSG00000028145 | 9380 Them4         |
| ENSMUSG00000022022 | 9381 Mtrf1         |
| ENSMUSG00000024350 | 9382 Dnajc18       |
| ENSMUSG00000034744 | 9383 Nagk          |
| ENSMUSG00000032300 | 9384 1700017B05Rik |
| ENSMUSG00000046636 | 9385 Gm7729        |
| ENSMUSG00000035007 | 9386 Rundc1        |
| ENSMUSG00000037003 | 9387 Tns2          |
| ENSMUSG00000023094 | 9388 Msrb2         |
| ENSMUSG00000023009 | 9389 Nckap5l       |
| ENSMUSG00000084616 | 9390 Gm25047       |
| ENSMUSG00000043895 | 9391 S1pr2         |
| ENSMUSG00000078765 | 9392 U2af1l4       |
| ENSMUSG00000044951 | 9393 Mylk4         |
| ENSMUSG00000049225 | 9394 Pdp1          |
| ENSMUSG00000042807 | 9395 Hecw2         |
| ENSMUSG00000084347 | 9396 Akt2-ps       |
| ENSMUSG00000032000 | 9397 Birc3         |
| ENSMUSG00000022451 | 9398 Twf1          |
| ENSMUSG00000092232 | 9399 Gm20521       |
| ENSMUSG00000086414 | 9400 Gm15645       |
| ENSMUSG00000030559 | 9401 Rab38         |
| ENSMUSG00000105233 | 9402 Gm20568       |
| ENSMUSG00000097119 | 9403 B230354K17Rik |
| ENSMUSG00000041920 | 9404 Slc16a6       |
| ENSMUSG00000041528 | 9405 Rnf123        |
| ENSMUSG00000033032 | 9406 Afap1l1       |



|                     |                    |
|---------------------|--------------------|
| ENSMUSG00000024778  | 9407 Fas           |
| ENSMUSG00000015766  | 9408 Eps8          |
| ENSMUSG00000026199  | 9409 Ankzf1        |
| ENSMUSG00000043262  | 9410 Uevld         |
| ENSMUSG00000020524  | 9411 Gria1         |
| ENSMUSG00000049764  | 9412 Zfp280b       |
| ENSMUSG00000041629  | 9413 Fam104a       |
| ENSMUSG00000035891  | 9414 Cerk          |
| ENSMUSG00000032590  | 9415 Apeh          |
| ENSMUSG00000051343  | 9416 Rab11fip5     |
| ENSMUSG00000085141  | 9417 Gm13429       |
| ENSMUSG00000061393  | 9418 Acvr2b        |
| ENSMUSG00000026904  | 9419 Slc4a10       |
| ENSMUSG00000029009  | 9420 Mthfr         |
| ENSMUSG00000033933  | 9421 Vhl           |
| ENSMUSG000000101845 | 9422 Gm28198       |
| ENSMUSG00000026463  | 9423 Atp2b4        |
| ENSMUSG00000035236  | 9424 Scai          |
| ENSMUSG00000063810  | 9425 Alms1         |
| ENSMUSG00000025094  | 9426 Slc18a2       |
| ENSMUSG00000022803  | 9427 Popdc2        |
| ENSMUSG00000047528  | 9428 Als2cr12      |
| ENSMUSG00000072660  | 9429 Gm6288        |
| ENSMUSG00000038836  | 9430 Agbl3         |
| ENSMUSG00000085891  | 9431 Gm14634       |
| ENSMUSG00000057457  | 9432 Phex          |
| ENSMUSG00000052105  | 9433 Mtcl1         |
| ENSMUSG00000031641  | 9434 Cbr4          |
| ENSMUSG00000036641  | 9435 Ccdc148       |
| ENSMUSG00000082848  | 9436 Gm16066       |
| ENSMUSG00000087687  | 9437 Pet100        |
| ENSMUSG00000046324  | 9438 Ermp1         |
| ENSMUSG00000039041  | 9439 Adrm1         |
| ENSMUSG00000031217  | 9440 Efnb1         |
| ENSMUSG00000038257  | 9441 Glra3         |
| ENSMUSG00000031343  | 9442 Gabra3        |
| ENSMUSG00000086003  | 9443 B230206L02Rik |
| ENSMUSG00000047248  | 9444 C2cd3         |
| ENSMUSG00000052566  | 9445 Hook2         |
| ENSMUSG00000074388  | 9446 Gm5544        |
| ENSMUSG00000092544  | 9447 Gm20422       |
| ENSMUSG00000036898  | 9448 Zfp157        |

|                     |                    |
|---------------------|--------------------|
| ENSMUSG00000066798  | 9449 Zbtb6         |
| ENSMUSG00000025104  | 9450 Hdgfrp3       |
| ENSMUSG00000017697  | 9451 Ada           |
| ENSMUSG00000025154  | 9452 Arhgap19      |
| ENSMUSG00000030730  | 9453 Atp2a1        |
| ENSMUSG00000022558  | 9454 Mroh1         |
| ENSMUSG00000070056  | 9455 Mfhas1        |
| ENSMUSG00000050272  | 9456 Dscam         |
| ENSMUSG00000000049  | 9457 Apoh          |
| ENSMUSG00000043671  | 9458 Dpy19l3       |
| ENSMUSG00000014668  | 9459 Chfr          |
| ENSMUSG00000030775  | 9460 Trat1         |
| ENSMUSG00000024511  | 9461 Rab27b        |
| ENSMUSG00000037784  | 9462 Dzip1l        |
| ENSMUSG00000048967  | 9463 Yjefn3        |
| ENSMUSG00000059456  | 9464 Ptk2b         |
| ENSMUSG00000012819  | 9465 Cdh23         |
| ENSMUSG00000020453  | 9466 Patz1         |
| ENSMUSG000000108702 | 9467 RP24-427A8.1  |
| ENSMUSG00000027935  | 9468 Rab13         |
| ENSMUSG00000084799  | 9469 Ino80dos      |
| ENSMUSG00000059851  | 9470 Suv420h2      |
| ENSMUSG00000028842  | 9471 Ago3          |
| ENSMUSG000000105835 | 9472 Smim14        |
| ENSMUSG00000024206  | 9473 Rfx2          |
| ENSMUSG000000102018 | 9474 K230010J24Rik |
| ENSMUSG00000030752  | 9475 Kdm8          |
| ENSMUSG00000063049  | 9476 Ing2          |
| ENSMUSG00000063652  | 9477 Slc22a21      |
| ENSMUSG00000031772  | 9478 Cntnap4       |
| ENSMUSG00000020627  | 9479 Khlh29        |
| ENSMUSG00000032507  | 9480 Fbxl2         |
| ENSMUSG00000036510  | 9481 Cdh8          |
| ENSMUSG000000108112 | 9482 RP24-491O6.1  |
| ENSMUSG00000039652  | 9483 Cpeb3         |
| ENSMUSG00000046417  | 9484 Lrrc75a       |
| ENSMUSG00000009585  | 9485 Apobec3       |
| ENSMUSG00000028575  | 9486 Eqtn          |
| ENSMUSG00000039375  | 9487 Wdr17         |
| ENSMUSG00000034587  | 9488 8430429K09Rik |
| ENSMUSG00000056917  | 9489 Sipa1         |
| ENSMUSG00000029119  | 9490 Man2b2        |

|                    |                    |
|--------------------|--------------------|
| ENSMUSG00000006021 | 9491 Kptn          |
| ENSMUSG00000028124 | 9492 Gclm          |
| ENSMUSG00000085436 | 9493 Zfp335os      |
| ENSMUSG00000032392 | 9494 Parp16        |
| ENSMUSG00000024691 | 9495 Fam111a       |
| ENSMUSG00000038888 | 9496 Ctu1          |
| ENSMUSG00000041926 | 9497 Rnpep         |
| ENSMUSG00000041261 | 9498 Car8          |
| ENSMUSG00000039982 | 9499 Dtx4          |
| ENSMUSG00000025077 | 9500 Dclre1a       |
| ENSMUSG00000022340 | 9501 Sybu          |
| ENSMUSG00000026568 | 9502 Mpc2          |
| ENSMUSG00000037902 | 9503 Sirpa         |
| ENSMUSG00000042156 | 9504 Dzip1         |
| ENSMUSG00000063894 | 9505 Zkscan8       |
| ENSMUSG00000020419 | 9506 Hormad2       |
| ENSMUSG00000038587 | 9507 Akap12        |
| ENSMUSG00000039637 | 9508 Coro7         |
| ENSMUSG00000032656 | 9509 March3        |
| ENSMUSG00000081094 | 9510 Rpl19-ps11    |
| ENSMUSG00000021661 | 9511 Ankra2        |
| ENSMUSG00000031872 | 9512 Bean1         |
| ENSMUSG00000085631 | 9513 9630028H03Rik |
| ENSMUSG00000022545 | 9514 Ercc4         |
| ENSMUSG00000028020 | 9515 Glrb          |
| ENSMUSG00000027956 | 9516 Tmem144       |
| ENSMUSG00000024831 | 9517 Ighmbp2       |
| ENSMUSG00000054509 | 9518 Parp4         |
| ENSMUSG00000080186 | 9519 Gm14448       |
| ENSMUSG00000040209 | 9520 Zfp704        |
| ENSMUSG00000036615 | 9521 Rfxap         |
| ENSMUSG00000024521 | 9522 Pmaip1        |
| ENSMUSG00000097875 | 9523 Gm26704       |
| ENSMUSG00000047692 | 9524 4930533K18Rik |
| ENSMUSG00000003344 | 9525 Btbd2         |
| ENSMUSG00000041737 | 9526 Tmem45b       |
| ENSMUSG00000053684 | 9527 BC048403      |
| ENSMUSG00000029049 | 9528 Morn1         |
| ENSMUSG00000082766 | 9529 1700064H15Rik |
| ENSMUSG00000000253 | 9530 Gmpr          |
| ENSMUSG00000043885 | 9531 Slc36a4       |
| ENSMUSG00000030041 | 9532 M1ap          |

|                    |                    |
|--------------------|--------------------|
| ENSMUSG00000039065 | 9533 Fam173b       |
| ENSMUSG00000004947 | 9534 Dtx2          |
| ENSMUSG00000042064 | 9535 Myo3b         |
| ENSMUSG00000014551 | 9536 Mrps25        |
| ENSMUSG00000001630 | 9537 Stk38l        |
| ENSMUSG00000044434 | 9538 Gm9791        |
| ENSMUSG00000061414 | 9539 Cracr2a       |
| ENSMUSG00000043061 | 9540 Tmem18        |
| ENSMUSG00000032121 | 9541 Tmem218       |
| ENSMUSG00000080059 | 9542 Rps19-ps3     |
| ENSMUSG00000026564 | 9543 Dusp27        |
| ENSMUSG00000020657 | 9544 Dnajc27       |
| ENSMUSG00000033282 | 9545 Rpgr1p1l      |
| ENSMUSG00000023206 | 9546 Il15ra        |
| ENSMUSG00000030515 | 9547 Tarsl2        |
| ENSMUSG00000062542 | 9548 Syt9          |
| ENSMUSG00000032841 | 9549 Prr5l         |
| ENSMUSG00000030551 | 9550 Nr2f2         |
| ENSMUSG00000058145 | 9551 Adamts17      |
| ENSMUSG00000032258 | 9552 Lca5          |
| ENSMUSG00000051758 | 9553 4930544M13Rik |
| ENSMUSG00000029452 | 9554 Tmem116       |
| ENSMUSG00000038507 | 9555 Parp12        |
| ENSMUSG00000032298 | 9556 Neil1         |
| ENSMUSG00000084950 | 9557 Gm5577        |
| ENSMUSG00000020272 | 9558 Stk10         |
| ENSMUSG00000026675 | 9559 Hsd17b7       |
| ENSMUSG00000038069 | 9560 Cdkn2aip      |
| ENSMUSG00000022762 | 9561 Ncam2         |
| ENSMUSG00000005225 | 9562 Plekha8       |
| ENSMUSG00000021893 | 9563 Capn7         |
| ENSMUSG00000035314 | 9564 Gdpc5         |
| ENSMUSG00000073433 | 9565 Arhgdig       |
| ENSMUSG00000028933 | 9566 Xrcc2         |
| ENSMUSG00000031629 | 9567 Cenpu         |
| ENSMUSG00000095028 | 9568 Sirpb1b       |
| ENSMUSG00000040621 | 9569 Gemin8        |
| ENSMUSG00000097080 | 9570 1700086O06Rik |
| ENSMUSG00000020717 | 9571 Pecam1        |
| ENSMUSG00000097580 | 9572 Gm5432        |
| ENSMUSG00000050069 | 9573 Grem2         |
| ENSMUSG00000025008 | 9574 Tctn3         |

|                     |                    |
|---------------------|--------------------|
| ENSMUSG00000031950  | 9575 Gabarapl2     |
| ENSMUSG00000072720  | 9576 Myo18b        |
| ENSMUSG00000001786  | 9577 Fbxo7         |
| ENSMUSG000000032305 | 9578 Fam219b       |
| ENSMUSG000000024131 | 9579 Slc3a1        |
| ENSMUSG000000029524 | 9580 Sirt4         |
| ENSMUSG000000061758 | 9581 Akr1b10       |
| ENSMUSG000000055214 | 9582 Pld5          |
| ENSMUSG000000057886 | 9583 Cbx3-ps6      |
| ENSMUSG000000026915 | 9584 Strbp         |
| ENSMUSG000000022091 | 9585 Sorbs3        |
| ENSMUSG000000026856 | 9586 Dolpp1        |
| ENSMUSG000000059588 | 9587 Calcrl        |
| ENSMUSG000000037795 | 9588 N4bp2         |
| ENSMUSG000000037020 | 9589 Wdr62         |
| ENSMUSG000000043279 | 9590 Trim56        |
| ENSMUSG000000059447 | 9591 Hadhb         |
| ENSMUSG000000074220 | 9592 Zfp382        |
| ENSMUSG000000056014 | 9593 A430033K04Rik |
| ENSMUSG000000039686 | 9594 Zer1          |
| ENSMUSG000000084825 | 9595 2410152P15Rik |
| ENSMUSG000000052557 | 9596 Gan           |
| ENSMUSG000000053552 | 9597 Ebf4          |
| ENSMUSG000000026946 | 9598 Nmi           |
| ENSMUSG000000030760 | 9599 Acer3         |
| ENSMUSG000000056215 | 9600 Lrguk         |
| ENSMUSG000000061013 | 9601 Mlx           |
| ENSMUSG000000024142 | 9602 Mlst8         |
| ENSMUSG000000081157 | 9603 Gm13552       |
| ENSMUSG000000027615 | 9604 Hps3          |
| ENSMUSG000000098530 | 9605 Gm28051       |
| ENSMUSG000000078779 | 9606 Zfp59         |
| ENSMUSG000000047554 | 9607 Tmem41b       |
| ENSMUSG000000059810 | 9608 Rgs3          |
| ENSMUSG000000030469 | 9609 Zfp719        |
| ENSMUSG000000022754 | 9610 Tmem45a       |
| ENSMUSG000000039519 | 9611 Cyp7b1        |
| ENSMUSG000000040557 | 9612 Wbscr27       |
| ENSMUSG000000044042 | 9613 Fmn1          |
| ENSMUSG000000027951 | 9614 Adar          |
| ENSMUSG000000021578 | 9615 Ccdc127       |
| ENSMUSG000000031290 | 9616 Lrch2         |

|                     |                    |
|---------------------|--------------------|
| ENSMUSG00000023966  | 9617 Rsph9         |
| ENSMUSG00000002109  | 9618 Ddb2          |
| ENSMUSG00000060477  | 9619 Irak2         |
| ENSMUSG000000085223 | 9620 Gm11210       |
| ENSMUSG00000042751  | 9621 Nmnat2        |
| ENSMUSG00000022560  | 9622 Slc52a2       |
| ENSMUSG000000057894 | 9623 Zfp329        |
| ENSMUSG00000029096  | 9624 Htra3         |
| ENSMUSG00000045639  | 9625 Zfp629        |
| ENSMUSG00000041324  | 9626 Inhba         |
| ENSMUSG00000016386  | 9627 Mpped2        |
| ENSMUSG00000078480  | 9628 Mrpl48-ps     |
| ENSMUSG00000020652  | 9629 Cenpo         |
| ENSMUSG00000049303  | 9630 Syt12         |
| ENSMUSG000000105423 | 9631 Gm36814       |
| ENSMUSG000000105963 | 9632 Gm43647       |
| ENSMUSG00000060402  | 9633 Chst8         |
| ENSMUSG00000098340  | 9634 Gm27253       |
| ENSMUSG000000087594 | 9635 BC039771      |
| ENSMUSG00000044083  | 9636 Efcab8        |
| ENSMUSG00000045838  | 9637 A430105I19Rik |
| ENSMUSG000000034714 | 9638 Ttyh2         |
| ENSMUSG00000015337  | 9639 Endog         |
| ENSMUSG00000000532  | 9640 Acvr1b        |
| ENSMUSG000000086758 | 9641 Gm13912       |
| ENSMUSG00000054966  | 9642 Lmntd1        |
| ENSMUSG00000029674  | 9643 Limk1         |
| ENSMUSG00000040712  | 9644 Camta2        |
| ENSMUSG00000008318  | 9645 Relt          |
| ENSMUSG00000055401  | 9646 Fbxo6         |
| ENSMUSG00000006378  | 9647 Gcat          |
| ENSMUSG00000084850  | 9648 Gm12092       |
| ENSMUSG00000031156  | 9649 Slc35a2       |
| ENSMUSG00000033088  | 9650 Triobp        |
| ENSMUSG00000028807  | 9651 Zbtb8a        |
| ENSMUSG00000032332  | 9652 Col12a1       |
| ENSMUSG00000046861  | 9653 Hectd3        |
| ENSMUSG00000024134  | 9654 Six2          |
| ENSMUSG00000066440  | 9655 Zfyve26       |
| ENSMUSG00000024773  | 9656 Atg2a         |
| ENSMUSG00000033847  | 9657 Pla2g4c       |
| ENSMUSG00000020441  | 9658 2310033P09Rik |

|                    |                    |
|--------------------|--------------------|
| ENSMUSG00000030110 | 9659 Ret           |
| ENSMUSG00000053870 | 9660 Fpgt          |
| ENSMUSG00000031504 | 9661 Rab20         |
| ENSMUSG00000033377 | 9662 Palmd         |
| ENSMUSG00000100457 | 9663 D830032E09Rik |
| ENSMUSG00000020888 | 9664 Dvl2          |
| ENSMUSG00000037326 | 9665 Capn15        |
| ENSMUSG00000053716 | 9666 Dusp7         |
| ENSMUSG00000034522 | 9667 Zfp395        |
| ENSMUSG00000052957 | 9668 Gas1          |
| ENSMUSG00000038742 | 9669 Angptl6       |
| ENSMUSG00000102014 | 9670 2900009J06Rik |
| ENSMUSG00000086495 | 9671 Gm13778       |
| ENSMUSG00000037437 | 9672 Adam32        |
| ENSMUSG00000087128 | 9673 Gm12655       |
| ENSMUSG00000035984 | 9674 Nme5          |
| ENSMUSG00000052949 | 9675 Rnf157        |
| ENSMUSG00000044636 | 9676 Csrnp2        |
| ENSMUSG00000000148 | 9677 Brat1         |
| ENSMUSG00000052906 | 9678 Ubxn8         |
| ENSMUSG00000039781 | 9679 Cep131        |
| ENSMUSG00000056531 | 9680 Ccdc18        |
| ENSMUSG00000032463 | 9681 Faim          |
| ENSMUSG00000095403 | 9682 Gm21092       |
| ENSMUSG00000078485 | 9683 Plekhn1       |
| ENSMUSG00000087370 | 9684 Tmem170b      |
| ENSMUSG00000024958 | 9685 Gpr137        |
| ENSMUSG00000006764 | 9686 Tph2          |
| ENSMUSG00000089708 | 9687 5330439A09Rik |
| ENSMUSG00000029029 | 9688 Wrap73        |
| ENSMUSG00000003559 | 9689 As3mt         |
| ENSMUSG00000030074 | 9690 Gxylt2        |
| ENSMUSG00000020661 | 9691 Dnmt3a        |
| ENSMUSG00000025892 | 9692 Gria4         |
| ENSMUSG00000085504 | 9693 Gm14055       |
| ENSMUSG00000042997 | 9694 Nhlrc3        |
| ENSMUSG00000042726 | 9695 Traftd1       |
| ENSMUSG00000033039 | 9696 Micall1       |
| ENSMUSG00000035847 | 9697 Ids           |
| ENSMUSG00000044378 | 9698 Slc15a5       |
| ENSMUSG00000107002 | 9699 NCBP2-AS2     |
| ENSMUSG00000102437 | 9700 Gm38048       |

|                     |                    |
|---------------------|--------------------|
| ENSMUSG00000097006  | 9701 9530082P21Rik |
| ENSMUSG00000027227  | 9702 Sord          |
| ENSMUSG00000066607  | 9703 6030419C18Rik |
| ENSMUSG00000030309  | 9704 Caprin2       |
| ENSMUSG00000034333  | 9705 Zbed4         |
| ENSMUSG00000044465  | 9706 Fam160a2      |
| ENSMUSG00000031373  | 9707 Car5b         |
| ENSMUSG00000087477  | 9708 Gm13822       |
| ENSMUSG00000046182  | 9709 Gsg1l         |
| ENSMUSG00000041058  | 9710 Wwp1          |
| ENSMUSG00000023806  | 9711 Rsph3b        |
| ENSMUSG00000032688  | 9712 Malt1         |
| ENSMUSG00000086228  | 9713 Ubap1l        |
| ENSMUSG00000051166  | 9714 Eml5          |
| ENSMUSG00000020758  | 9715 Itgb4         |
| ENSMUSG00000070808  | 9716 Gltscr1       |
| ENSMUSG00000029122  | 9717 Evc           |
| ENSMUSG00000052794  | 9718 1700030K09Rik |
| ENSMUSG000000102426 | 9719 Kantr         |
| ENSMUSG00000041609  | 9720 Ccdc64        |
| ENSMUSG00000087523  | 9721 Gm12319       |
| ENSMUSG00000032606  | 9722 Nicn1         |
| ENSMUSG00000069114  | 9723 Zbtb10        |
| ENSMUSG00000070814  | 9724 6330408A02Rik |
| ENSMUSG00000020743  | 9725 Mif4gd        |
| ENSMUSG00000055403  | 9726 4933427D06Rik |
| ENSMUSG00000048668  | 9727 Rhno1         |
| ENSMUSG00000013495  | 9728 Tmem175       |
| ENSMUSG00000000881  | 9729 Dlg3          |
| ENSMUSG00000048911  | 9730 Rnf24         |
| ENSMUSG00000044026  | 9731 Slc35g1       |
| ENSMUSG000000107369 | 9732 Gstm2-ps1     |
| ENSMUSG00000097631  | 9733 Gm2716        |
| ENSMUSG00000050071  | 9734 Bex1          |
| ENSMUSG00000024558  | 9735 Mapk4         |
| ENSMUSG00000043424  | 9736 Eif3j2        |
| ENSMUSG000000101969 | 9737 Gm20125       |
| ENSMUSG000000107770 | 9738 RP24-554L15.2 |
| ENSMUSG00000043866  | 9739 Taf10         |
| ENSMUSG00000039976  | 9740 Tbc1d16       |
| ENSMUSG00000098087  | 9741 Gm17750       |
| ENSMUSG00000042770  | 9742 Hebp1         |



|                    |                    |
|--------------------|--------------------|
| ENSMUSG00000031284 | 9743 Pak3          |
| ENSMUSG00000062210 | 9744 Tnfaip8       |
| ENSMUSG00000020475 | 9745 Pgam2         |
| ENSMUSG00000051726 | 9746 Kcnf1         |
| ENSMUSG00000023236 | 9747 Scg5          |
| ENSMUSG00000043872 | 9748 Zmym1         |
| ENSMUSG00000019929 | 9749 Dcn           |
| ENSMUSG00000041180 | 9750 Hectd2        |
| ENSMUSG00000066613 | 9751 Zfp932        |
| ENSMUSG00000084407 | 9752 Gm14018       |
| ENSMUSG00000020633 | 9753 Dcdc2c        |
| ENSMUSG00000050174 | 9754 Nudt6         |
| ENSMUSG00000059883 | 9755 Irak4         |
| ENSMUSG00000034438 | 9756 Gbp8          |
| ENSMUSG00000021078 | 9757 Tomm20l       |
| ENSMUSG00000045802 | 9758 Hsf3          |
| ENSMUSG00000040722 | 9759 Scamp5        |
| ENSMUSG00000029245 | 9760 Epha5         |
| ENSMUSG00000028334 | 9761 Nans          |
| ENSMUSG00000070867 | 9762 Trabd2b       |
| ENSMUSG00000081643 | 9763 Gm11605       |
| ENSMUSG00000092118 | 9764 Fancf         |
| ENSMUSG00000067285 | 9765 Gm16223       |
| ENSMUSG00000039958 | 9766 Mettl20       |
| ENSMUSG00000035062 | 9767 Zc4h2         |
| ENSMUSG00000052336 | 9768 Cx3cr1        |
| ENSMUSG00000026500 | 9769 Cox20         |
| ENSMUSG00000028057 | 9770 Rit1          |
| ENSMUSG00000099794 | 9771 1700128A07Rik |
| ENSMUSG00000039270 | 9772 Megf9         |
| ENSMUSG00000030407 | 9773 Qpctl         |
| ENSMUSG00000086889 | 9774 Phf2os1       |
| ENSMUSG00000074890 | 9775 Lcmt2         |
| ENSMUSG00000059277 | 9776 R74862        |
| ENSMUSG00000100002 | 9777 Gm29642       |
| ENSMUSG00000019850 | 9778 Tnfaip3       |
| ENSMUSG00000025921 | 9779 Rdh10         |
| ENSMUSG00000050088 | 9780 1600012H06Rik |
| ENSMUSG00000064317 | 9781 Gm10146       |
| ENSMUSG00000049891 | 9782 Gm7984        |
| ENSMUSG00000046942 | 9783 Mageb16       |
| ENSMUSG00000056832 | 9784 Ttc26         |

|                    |                    |
|--------------------|--------------------|
| ENSMUSG00000033458 | 9785 Fan1          |
| ENSMUSG00000025218 | 9786 Poll          |
| ENSMUSG00000053414 | 9787 Hunk          |
| ENSMUSG00000028789 | 9788 Azin2         |
| ENSMUSG00000050619 | 9789 Zscan29       |
| ENSMUSG00000073094 | 9790 Smim9         |
| ENSMUSG00000032735 | 9791 Ablim3        |
| ENSMUSG00000020185 | 9792 E2f7          |
| ENSMUSG00000049349 | 9793 Gm5105        |
| ENSMUSG00000036864 | 9794 Proser3       |
| ENSMUSG00000046997 | 9795 Spsb4         |
| ENSMUSG00000046991 | 9796 Wdr27         |
| ENSMUSG00000023755 | 9797 Rhebl1        |
| ENSMUSG00000021136 | 9798 Smoc1         |
| ENSMUSG00000025138 | 9799 Sirt7         |
| ENSMUSG00000085241 | 9800 Snhg3         |
| ENSMUSG00000102682 | 9801 Gm37223       |
| ENSMUSG00000026317 | 9802 Cln8          |
| ENSMUSG00000032403 | 9803 2300009A05Rik |
| ENSMUSG00000028476 | 9804 Reck          |
| ENSMUSG00000075307 | 9805 Khlh41        |
| ENSMUSG00000075225 | 9806 Ccdc162       |
| ENSMUSG00000054178 | 9807 Gm9938        |
| ENSMUSG00000025572 | 9808 Tmc6          |
| ENSMUSG00000037410 | 9809 Tbc1d2b       |
| ENSMUSG00000025377 | 9810 Enthd2        |
| ENSMUSG00000022617 | 9811 Chkb          |
| ENSMUSG00000022471 | 9812 Xrcc6         |
| ENSMUSG00000024014 | 9813 Pim1          |
| ENSMUSG00000040697 | 9814 Dnajc16       |
| ENSMUSG00000037942 | 9815 Crp           |
| ENSMUSG00000039633 | 9816 Lonrf1        |
| ENSMUSG00000048782 | 9817 Insc          |
| ENSMUSG00000031723 | 9818 Txnl4b        |
| ENSMUSG00000063364 | 9819 3300002I08Rik |
| ENSMUSG00000020513 | 9820 Tubd1         |
| ENSMUSG00000093806 | 9821 Asmt          |
| ENSMUSG00000041444 | 9822 Arhgap32      |
| ENSMUSG00000027259 | 9823 Adal          |
| ENSMUSG00000002661 | 9824 Alkbh7        |
| ENSMUSG00000078651 | 9825 Aoc2          |
| ENSMUSG00000097091 | 9826 4930526L06Rik |

|                    |                    |
|--------------------|--------------------|
| ENSMUSG00000002996 | 9827 Hbp1          |
| ENSMUSG00000010660 | 9828 Plcd1         |
| ENSMUSG00000036214 | 9829 Znrd1as       |
| ENSMUSG00000024349 | 9830 Tmem173       |
| ENSMUSG00000097723 | 9831 Gm26848       |
| ENSMUSG00000030075 | 9832 Cntn3         |
| ENSMUSG00000097016 | 9833 Gm26708       |
| ENSMUSG00000032640 | 9834 Chsy1         |
| ENSMUSG00000028411 | 9835 Aptx          |
| ENSMUSG00000028664 | 9836 Ephb2         |
| ENSMUSG00000019992 | 9837 Mtfr2         |
| ENSMUSG00000016526 | 9838 Dyrk3         |
| ENSMUSG00000039914 | 9839 Coq10a        |
| ENSMUSG00000091119 | 9840 Ccdc152       |
| ENSMUSG00000032311 | 9841 Nrg4          |
| ENSMUSG00000078570 | 9842 1110065P20Rik |
| ENSMUSG00000080850 | 9843 Gm12439       |
| ENSMUSG00000029165 | 9844 Agbl5         |
| ENSMUSG00000031310 | 9845 Zmym3         |
| ENSMUSG00000094724 | 9846 Rnaset2b      |
| ENSMUSG00000002486 | 9847 Tchp          |
| ENSMUSG00000086016 | 9848 1700084C06Rik |
| ENSMUSG00000027792 | 9849 Bche          |
| ENSMUSG00000014075 | 9850 Tctex1d2      |
| ENSMUSG00000047767 | 9851 Atg16l2       |
| ENSMUSG00000036564 | 9852 Ndr4          |
| ENSMUSG00000061897 | 9853 Gm14292       |
| ENSMUSG00000030470 | 9854 Csrp3         |
| ENSMUSG00000045519 | 9855 Zfp560        |
| ENSMUSG00000086275 | 9856 1700121C08Rik |
| ENSMUSG00000013646 | 9857 Sh3bp5l       |
| ENSMUSG00000031844 | 9858 Hsd17b2       |
| ENSMUSG00000026584 | 9859 Scyl3         |
| ENSMUSG00000000552 | 9860 Zfp385a       |
| ENSMUSG00000082163 | 9861 Gm14276       |
| ENSMUSG00000029722 | 9862 Agfg2         |
| ENSMUSG00000052423 | 9863 B4galt3       |
| ENSMUSG00000046532 | 9864 Ar            |
| ENSMUSG00000055489 | 9865 Ano5          |
| ENSMUSG00000007783 | 9866 Cpt1c         |
| ENSMUSG00000028214 | 9867 Gem           |
| ENSMUSG00000027134 | 9868 Lpcat4        |

|                    |                    |
|--------------------|--------------------|
| ENSMUSG00000025512 | 9869 Chid1         |
| ENSMUSG00000058192 | 9870 Zfp846        |
| ENSMUSG00000040473 | 9871 Cfap69        |
| ENSMUSG00000039501 | 9872 Znfx1         |
| ENSMUSG00000087213 | 9873 2810408I11Rik |
| ENSMUSG00000030385 | 9874 2900092C05Rik |
| ENSMUSG00000098104 | 9875 Gm6085        |
| ENSMUSG00000035916 | 9876 Ptprq         |
| ENSMUSG00000096472 | 9877 Cdkn2d        |
| ENSMUSG00000008167 | 9878 Fbxw9         |
| ENSMUSG00000044134 | 9879 Fam109a       |
| ENSMUSG00000020614 | 9880 Fam20a        |
| ENSMUSG00000083166 | 9881 Gm8648        |
| ENSMUSG00000056494 | 9882 Cngb3         |
| ENSMUSG00000046337 | 9883 Fam178b       |
| ENSMUSG00000032334 | 9884 Loxl1         |
| ENSMUSG00000045098 | 9885 Suv420h1      |
| ENSMUSG00000071716 | 9886 Apol7e        |
| ENSMUSG00000033460 | 9887 Armcx1        |
| ENSMUSG00000032359 | 9888 Ctsh          |
| ENSMUSG00000107014 | 9889 1700126H18Rik |
| ENSMUSG00000065037 | 9890 Rn7sk         |
| ENSMUSG00000024887 | 9891 Asah2         |
| ENSMUSG00000022292 | 9892 Rrm2b         |
| ENSMUSG00000027071 | 9893 P2rx3         |
| ENSMUSG00000107160 | 9894 Gm42666       |
| ENSMUSG00000031833 | 9895 Mast3         |
| ENSMUSG00000097162 | 9896 2310010J17Rik |
| ENSMUSG00000036775 | 9897 Decr2         |
| ENSMUSG00000018899 | 9898 Irf1          |
| ENSMUSG00000032015 | 9899 Pou2f3        |
| ENSMUSG00000020228 | 9900 Helb          |
| ENSMUSG00000026958 | 9901 Dpp7          |
| ENSMUSG00000022231 | 9902 Sema5a        |
| ENSMUSG00000018733 | 9903 Pex12         |
| ENSMUSG00000033467 | 9904 Crlf2         |
| ENSMUSG00000059540 | 9905 Tcea2         |
| ENSMUSG00000048897 | 9906 Zfp710        |
| ENSMUSG00000029851 | 9907 Tcaf2         |
| ENSMUSG00000063767 | 9908 S100a7a       |
| ENSMUSG00000033751 | 9909 Gadd45gip1    |
| ENSMUSG00000042328 | 9910 Hps4          |

|                     |                    |
|---------------------|--------------------|
| ENSMUSG00000037344  | 9911 Slc12a9       |
| ENSMUSG00000049488  | 9912 Tmem67        |
| ENSMUSG00000062906  | 9913 Hdac10        |
| ENSMUSG00000085720  | 9914 Gm7854        |
| ENSMUSG00000041272  | 9915 Tox           |
| ENSMUSG00000017405  | 9916 Nek8          |
| ENSMUSG00000040537  | 9917 Adam22        |
| ENSMUSG00000039395  | 9918 Mreg          |
| ENSMUSG00000038323  | 9919 1700066M21Rik |
| ENSMUSG00000044244  | 9920 Il20rb        |
| ENSMUSG000000100589 | 9921 4930533P14Rik |
| ENSMUSG00000064120  | 9922 Mocs1         |
| ENSMUSG00000039754  | 9923 Alkbh4        |
| ENSMUSG00000044452  | 9924 Zfp507        |
| ENSMUSG00000026064  | 9925 Ptp4a1        |
| ENSMUSG00000016552  | 9926 Foxred2       |
| ENSMUSG00000026820  | 9927 Ptges2        |
| ENSMUSG00000034101  | 9928 Ctnnd1        |
| ENSMUSG00000044786  | 9929 Zfp36         |
| ENSMUSG00000026437  | 9930 Cdk18         |
| ENSMUSG00000020037  | 9931 Rfx4          |
| ENSMUSG00000001128  | 9932 Cfp           |
| ENSMUSG00000063446  | 9933 Lppr1         |
| ENSMUSG00000055632  | 9934 Hmcn2         |
| ENSMUSG00000092539  | 9935 Gm20468       |
| ENSMUSG000000107872 | 9936 RP24-127M20.8 |
| ENSMUSG00000087701  | 9937 Gm13493       |
| ENSMUSG00000084790  | 9938 Gm15879       |
| ENSMUSG00000016179  | 9939 Camk1g        |
| ENSMUSG00000046844  | 9940 Vat1l         |
| ENSMUSG00000085492  | 9941 Trmt61b       |
| ENSMUSG00000032702  | 9942 Kank1         |
| ENSMUSG00000027324  | 9943 Rpusd2        |
| ENSMUSG00000038569  | 9944 Rad9b         |
| ENSMUSG00000026387  | 9945 Sctr          |
| ENSMUSG00000075033  | 9946 Nxpe3         |
| ENSMUSG00000035329  | 9947 Fbxo33        |
| ENSMUSG00000051721  | 9948 BC068281      |
| ENSMUSG00000019933  | 9949 Mrln          |
| ENSMUSG00000056296  | 9950 Synpr         |
| ENSMUSG00000099752  | 9951 Gm29018       |
| ENSMUSG00000090053  | 9952 Palm2         |

|                    |                    |
|--------------------|--------------------|
| ENSMUSG00000026798 | 9953 Coq4          |
| ENSMUSG00000025946 | 9954 Pth2r         |
| ENSMUSG00000052914 | 9955 Cyp2j6        |
| ENSMUSG00000031255 | 9956 Sytl4         |
| ENSMUSG00000025759 | 9957 Mfsd8         |
| ENSMUSG00000029127 | 9958 Zbtb49        |
| ENSMUSG00000041268 | 9959 Dmxl2         |
| ENSMUSG00000018474 | 9960 Chd3          |
| ENSMUSG00000070730 | 9961 Rmdn3         |
| ENSMUSG00000023034 | 9962 Nr4a1         |
| ENSMUSG00000027175 | 9963 Tcpl1l1       |
| ENSMUSG00000040957 | 9964 Cables1       |
| ENSMUSG00000026821 | 9965 Ralgds        |
| ENSMUSG00000021109 | 9966 Hif1a         |
| ENSMUSG00000039115 | 9967 Itga9         |
| ENSMUSG00000025893 | 9968 Kbtbd3        |
| ENSMUSG00000023832 | 9969 Acat2         |
| ENSMUSG00000005968 | 9970 Tuft1         |
| ENSMUSG00000030890 | 9971 Ilk           |
| ENSMUSG00000101356 | 9972 Gm28876       |
| ENSMUSG00000095362 | 9973 Gm14325       |
| ENSMUSG00000074406 | 9974 Zfp628        |
| ENSMUSG00000049164 | 9975 Zfp518a       |
| ENSMUSG00000044348 | 9976 Slc25a53      |
| ENSMUSG00000037434 | 9977 Slc30a1       |
| ENSMUSG00000044005 | 9978 Glis2         |
| ENSMUSG00000068747 | 9979 Sort1         |
| ENSMUSG00000087640 | 9980 Gm14798       |
| ENSMUSG00000026204 | 9981 Ptprn         |
| ENSMUSG00000064043 | 9982 Trerf1        |
| ENSMUSG00000090862 | 9983 Rps13         |
| ENSMUSG00000027739 | 9984 Rab33b        |
| ENSMUSG00000046314 | 9985 Stxbp6        |
| ENSMUSG00000013878 | 9986 Rnf170        |
| ENSMUSG00000029073 | 9987 Cptp          |
| ENSMUSG00000104309 | 9988 Gm5846        |
| ENSMUSG00000001604 | 9989 Tcea3         |
| ENSMUSG00000074909 | 9990 Ranbp6        |
| ENSMUSG00000036099 | 9991 Vezt          |
| ENSMUSG00000049600 | 9992 Zbtb45        |
| ENSMUSG00000063320 | 9993 1190007I07Rik |
| ENSMUSG00000050786 | 9994 Ccdc126       |

|                    |                     |
|--------------------|---------------------|
| ENSMUSG00000028101 | 9995 Pias3          |
| ENSMUSG00000048351 | 9996 Coa7           |
| ENSMUSG00000057604 | 9997 Lmcd1          |
| ENSMUSG00000030035 | 9998 Wbp1           |
| ENSMUSG00000074064 | 9999 Mlycd          |
| ENSMUSG00000066026 | 10000 Dhrc3         |
| ENSMUSG00000045636 | 10001 Mtus1         |
| ENSMUSG00000011658 | 10002 Fuz           |
| ENSMUSG00000026279 | 10003 Thap4         |
| ENSMUSG00000051331 | 10004 Cacna1c       |
| ENSMUSG00000051007 | 10005 Pddc1         |
| ENSMUSG00000034111 | 10006 Tmed8         |
| ENSMUSG00000074300 | 10007 BC030870      |
| ENSMUSG00000063455 | 10008 D630045J12Rik |
| ENSMUSG00000100319 | 10009 Gm5256        |
| ENSMUSG00000075254 | 10010 Heg1          |
| ENSMUSG00000044573 | 10011 Acp1          |
| ENSMUSG00000056602 | 10012 Fry           |
| ENSMUSG00000061898 | 10013 Rbak          |
| ENSMUSG00000027679 | 10014 Dnajc19       |
| ENSMUSG00000015542 | 10015 Nat9          |
| ENSMUSG00000029468 | 10016 P2rx7         |
| ENSMUSG00000047793 | 10017 Sned1         |
| ENSMUSG00000044350 | 10018 Lacc1         |
| ENSMUSG00000035547 | 10019 Capn5         |
| ENSMUSG00000044617 | 10020 Zbtb39        |
| ENSMUSG00000104218 | 10021 Gm9134        |
| ENSMUSG00000062116 | 10022 Zfp954        |
| ENSMUSG00000044937 | 10023 Ttc41         |
| ENSMUSG00000097060 | 10024 Gm26759       |
| ENSMUSG00000041939 | 10025 Mvk           |
| ENSMUSG00000018341 | 10026 Il12rb2       |
| ENSMUSG00000099843 | 10027 Gm7160        |
| ENSMUSG00000086607 | 10028 4930511M06Rik |
| ENSMUSG00000037108 | 10029 Zcwpw1        |
| ENSMUSG00000103593 | 10030 Gm37352       |
| ENSMUSG00000021322 | 10031 Aoah          |
| ENSMUSG00000038425 | 10032 Poli          |
| ENSMUSG00000034105 | 10033 Tldc1         |
| ENSMUSG00000092345 | 10034 Gm20503       |
| ENSMUSG00000062093 | 10035 Gm10110       |
| ENSMUSG00000085124 | 10036 Gm12766       |

|                    |                     |
|--------------------|---------------------|
| ENSMUSG00000071226 | 10037 Cocr2         |
| ENSMUSG00000085500 | 10038 Gm16976       |
| ENSMUSG00000044145 | 10039 1810024B03Rik |
| ENSMUSG00000049791 | 10040 Fzd4          |
| ENSMUSG00000021245 | 10041 Mlh3          |
| ENSMUSG00000086782 | 10042 E130102H24Rik |
| ENSMUSG00000030725 | 10043 Lipt2         |
| ENSMUSG00000036158 | 10044 Prickle1      |
| ENSMUSG00000030424 | 10045 Zfp939        |
| ENSMUSG00000028454 | 10046 Pigo          |
| ENSMUSG00000036109 | 10047 Mbnl3         |
| ENSMUSG00000037101 | 10048 Ttc29         |
| ENSMUSG00000037337 | 10049 Map4k1        |
| ENSMUSG00000066442 | 10050 Mthfs         |
| ENSMUSG00000063684 | 10051 Gm13910       |
| ENSMUSG00000041298 | 10052 Katnal1       |
| ENSMUSG00000068479 | 10053 Mfap1a        |
| ENSMUSG00000053441 | 10054 Adamts19      |
| ENSMUSG00000031577 | 10055 Tti2          |
| ENSMUSG00000101854 | 10056 1700026F02Rik |
| ENSMUSG00000037761 | 10057 Actr5         |
| ENSMUSG00000055639 | 10058 Dach1         |
| ENSMUSG00000070883 | 10059 Ccdc173       |
| ENSMUSG00000032114 | 10060 Slc37a4       |
| ENSMUSG00000047446 | 10061 Arl4a         |
| ENSMUSG00000102013 | 10062 E330023G01Rik |
| ENSMUSG00000031303 | 10063 Map3k15       |
| ENSMUSG00000047141 | 10064 Zfp654        |
| ENSMUSG00000083367 | 10065 Gm8806        |
| ENSMUSG00000000915 | 10066 Hip1r         |
| ENSMUSG00000024101 | 10067 Wash1         |
| ENSMUSG00000061132 | 10068 Blnk          |
| ENSMUSG00000084129 | 10069 Hmgb1-ps1     |
| ENSMUSG00000031027 | 10070 Stk33         |
| ENSMUSG00000004748 | 10071 Mtfp1         |
| ENSMUSG00000050908 | 10072 Tvp23a        |
| ENSMUSG00000026017 | 10073 Carf          |
| ENSMUSG00000034006 | 10074 Pqlc1         |
| ENSMUSG00000039096 | 10075 Rsad1         |
| ENSMUSG00000033624 | 10076 Pdpr          |
| ENSMUSG00000002871 | 10077 Tpra1         |
| ENSMUSG00000045980 | 10078 Tmem104       |



|                    |                     |
|--------------------|---------------------|
| ENSMUSG00000101799 | 10079 9330175M20Rik |
| ENSMUSG00000098702 | 10080 1500015A07Rik |
| ENSMUSG00000044770 | 10081 Scml4         |
| ENSMUSG00000020905 | 10082 Usp43         |
| ENSMUSG00000022948 | 10083 Setd4         |
| ENSMUSG00000026514 | 10084 Cnih3         |
| ENSMUSG00000027075 | 10085 Slc43a1       |
| ENSMUSG00000038175 | 10086 Mylip         |
| ENSMUSG00000039568 | 10087 Ubald1        |
| ENSMUSG00000050222 | 10088 Il17d         |
| ENSMUSG00000079652 | 10089 Fam71f2       |
| ENSMUSG00000024743 | 10090 Syt7          |
| ENSMUSG00000028668 | 10091 Tceb3         |
| ENSMUSG00000005125 | 10092 Ndrp1         |
| ENSMUSG00000084215 | 10093 Gm11814       |
| ENSMUSG00000000094 | 10094 Tbx4          |
| ENSMUSG00000079045 | 10095 Prox1os       |
| ENSMUSG00000028637 | 10096 Ccdc30        |
| ENSMUSG00000028354 | 10097 Fmn2          |
| ENSMUSG00000028164 | 10098 Manba         |
| ENSMUSG00000021186 | 10099 Fbln5         |
| ENSMUSG00000028952 | 10100 Zbtb48        |
| ENSMUSG00000107287 | 10101 Gm43458       |
| ENSMUSG00000036281 | 10102 Snapc4        |
| ENSMUSG00000087497 | 10103 2810001G20Rik |
| ENSMUSG00000030720 | 10104 Cln3          |
| ENSMUSG00000015944 | 10105 Gatsl2        |
| ENSMUSG00000039236 | 10106 Isg20         |
| ENSMUSG00000041669 | 10107 Prima1        |
| ENSMUSG00000028439 | 10108 Fam219a       |
| ENSMUSG00000022821 | 10109 Hgd           |
| ENSMUSG00000029126 | 10110 Nsg1          |
| ENSMUSG00000022248 | 10111 Rad1          |
| ENSMUSG00000038178 | 10112 Slc43a2       |
| ENSMUSG00000097196 | 10113 Gm26665       |
| ENSMUSG00000025417 | 10114 Pip4k2c       |
| ENSMUSG00000029097 | 10115 Trmt44        |
| ENSMUSG00000037366 | 10116 Pafah2        |
| ENSMUSG00000019845 | 10117 Tube1         |
| ENSMUSG00000039206 | 10118 Daglb         |
| ENSMUSG00000089788 | 10119 Gm16586       |
| ENSMUSG00000003809 | 10120 Gcdh          |

|                     |                     |
|---------------------|---------------------|
| ENSMUSG00000046822  | 10121 Slc39a3       |
| ENSMUSG00000027860  | 10122 Vangl1        |
| ENSMUSG00000020828  | 10123 Pld2          |
| ENSMUSG00000030393  | 10124 Zik1          |
| ENSMUSG00000020620  | 10125 Abca8b        |
| ENSMUSG00000045975  | 10126 C2cd2         |
| ENSMUSG00000001751  | 10127 Naglu         |
| ENSMUSG000000100863 | 10128 Gm12669       |
| ENSMUSG00000026347  | 10129 Tmem163       |
| ENSMUSG00000024910  | 10130 Ctsw          |
| ENSMUSG00000074802  | 10131 Gas2l3        |
| ENSMUSG00000097378  | 10132 B230208H11Rik |
| ENSMUSG00000049804  | 10133 Armcx4        |
| ENSMUSG00000028671  | 10134 Gale          |
| ENSMUSG00000022575  | 10135 Gsdmd         |
| ENSMUSG00000062742  | 10136 Gm5239        |
| ENSMUSG00000046567  | 10137 4930430F08Rik |
| ENSMUSG00000031097  | 10138 Tnni2         |
| ENSMUSG00000030761  | 10139 Myo7a         |
| ENSMUSG00000003665  | 10140 Has1          |
| ENSMUSG00000036800  | 10141 Fam135b       |
| ENSMUSG00000028328  | 10142 Tmod1         |
| ENSMUSG000000100078 | 10143 Gm6170        |
| ENSMUSG00000037653  | 10144 Kctd8         |
| ENSMUSG00000049672  | 10145 Zbtb14        |
| ENSMUSG00000026778  | 10146 Prkcq         |
| ENSMUSG00000038489  | 10147 Polr2l        |
| ENSMUSG00000097393  | 10148 D030068K23Rik |
| ENSMUSG00000027582  | 10149 Zgpat         |
| ENSMUSG00000044447  | 10150 Dock5         |
| ENSMUSG00000094707  | 10151 A830019P07Rik |
| ENSMUSG00000021884  | 10152 Hacl1         |
| ENSMUSG00000026495  | 10153 Efcab2        |
| ENSMUSG00000029378  | 10154 Areg          |
| ENSMUSG00000003752  | 10155 Itpkc         |
| ENSMUSG00000057572  | 10156 Zbtb8os       |
| ENSMUSG00000040919  | 10157 4930505A04Rik |
| ENSMUSG00000098098  | 10158 Bvht          |
| ENSMUSG00000034842  | 10159 Art3          |
| ENSMUSG00000032816  | 10160 Igdcc4        |
| ENSMUSG00000035258  | 10161 Abi3bp        |
| ENSMUSG00000033107  | 10162 Rnf125        |

|                    |                     |
|--------------------|---------------------|
| ENSMUSG00000031559 | 10163 4930555F03Rik |
| ENSMUSG00000050439 | 10164 Enthd1        |
| ENSMUSG00000037847 | 10165 Nmrk1         |
| ENSMUSG00000032333 | 10166 Stoml1        |
| ENSMUSG00000002249 | 10167 Tead3         |
| ENSMUSG00000073010 | 10168 Gm5127        |
| ENSMUSG00000060371 | 10169 Caln1         |
| ENSMUSG00000097102 | 10170 2310069G16Rik |
| ENSMUSG00000004098 | 10171 Col5a3        |
| ENSMUSG00000027419 | 10172 Pcsk2         |
| ENSMUSG00000033688 | 10173 1300017J02Rik |
| ENSMUSG00000012429 | 10174 Mplkip        |
| ENSMUSG00000029311 | 10175 Hsd17b11      |
| ENSMUSG00000020707 | 10176 Rnf135        |
| ENSMUSG00000022793 | 10177 B4galt4       |
| ENSMUSG00000060459 | 10178 Kng2          |
| ENSMUSG00000071141 | 10179 Rpl36a-ps3    |
| ENSMUSG00000074519 | 10180 Etohi1        |
| ENSMUSG00000028687 | 10181 Mutyh         |
| ENSMUSG00000036246 | 10182 Gmip          |
| ENSMUSG00000063663 | 10183 Brwd3         |
| ENSMUSG00000013921 | 10184 Clip3         |
| ENSMUSG00000000126 | 10185 Wnt9a         |
| ENSMUSG00000034674 | 10186 Tdg           |
| ENSMUSG00000083116 | 10187 Gm13410       |
| ENSMUSG00000021306 | 10188 Gpr137b       |
| ENSMUSG00000027510 | 10189 Rbm38         |
| ENSMUSG00000028603 | 10190 Scp2          |
| ENSMUSG00000106461 | 10191 Gm20755       |
| ENSMUSG00000024308 | 10192 Tapbp         |
| ENSMUSG00000013539 | 10193 Tango2        |
| ENSMUSG00000063626 | 10194 Unc5d         |
| ENSMUSG00000032625 | 10195 Thsd7a        |
| ENSMUSG00000107419 | 10196 RP23-206K5.1  |
| ENSMUSG00000038301 | 10197 Snx10         |
| ENSMUSG00000048087 | 10198 Gm4737        |
| ENSMUSG00000047443 | 10199 Fam132b       |
| ENSMUSG00000086727 | 10200 4931428L18Rik |
| ENSMUSG00000025766 | 10201 D3Ertd751e    |
| ENSMUSG00000026594 | 10202 Ralgps2       |
| ENSMUSG00000032344 | 10203 Mb21d1        |
| ENSMUSG00000078866 | 10204 Gm14420       |

|                    |                     |
|--------------------|---------------------|
| ENSMUSG00000010057 | 10205 Nprl2         |
| ENSMUSG00000065611 | 10206 Mir23a        |
| ENSMUSG00000025257 | 10207 Ribc1         |
| ENSMUSG00000090626 | 10208 Tex9          |
| ENSMUSG00000057880 | 10209 Abat          |
| ENSMUSG00000048497 | 10210 Mmgt2         |
| ENSMUSG00000087180 | 10211 Gm11924       |
| ENSMUSG00000019796 | 10212 Lrp11         |
| ENSMUSG00000021314 | 10213 Amph          |
| ENSMUSG00000032915 | 10214 Adgre4        |
| ENSMUSG00000042642 | 10215 Flad1         |
| ENSMUSG00000089787 | 10216 Gm15825       |
| ENSMUSG00000025323 | 10217 Sp4           |
| ENSMUSG00000102869 | 10218 2900097C17Rik |
| ENSMUSG00000039913 | 10219 Pak7          |
| ENSMUSG00000022237 | 10220 Ankrd33b      |
| ENSMUSG00000040102 | 10221 Klhl42        |
| ENSMUSG00000082530 | 10222 Gm12168       |
| ENSMUSG00000051705 | 10223 Senp8         |
| ENSMUSG00000054752 | 10224 Fsd1l         |
| ENSMUSG00000054556 | 10225 Gm4876        |
| ENSMUSG00000086587 | 10226 Gm11837       |
| ENSMUSG00000025971 | 10227 9430016H08Rik |
| ENSMUSG00000037594 | 10228 BC022687      |
| ENSMUSG00000046667 | 10229 Rbm12b1       |
| ENSMUSG00000102476 | 10230 Gm37245       |
| ENSMUSG00000078546 | 10231 2210404O09Rik |
| ENSMUSG00000028619 | 10232 Tceanc2       |
| ENSMUSG00000069678 | 10233 Pcgf1         |
| ENSMUSG00000081418 | 10234 Gm14830       |
| ENSMUSG00000026436 | 10235 Elk4          |
| ENSMUSG00000049232 | 10236 Tigd2         |
| ENSMUSG00000032470 | 10237 Mras          |
| ENSMUSG00000033728 | 10238 Lrrc14        |
| ENSMUSG00000031712 | 10239 Il15          |
| ENSMUSG00000030386 | 10240 Zfp606        |
| ENSMUSG00000025353 | 10241 Ormdl2        |
| ENSMUSG00000030145 | 10242 Zfp248        |
| ENSMUSG00000022422 | 10243 Dsccl         |
| ENSMUSG00000037355 | 10244 Uvssa         |
| ENSMUSG00000055775 | 10245 Myh8          |
| ENSMUSG00000003644 | 10246 Rps6ka1       |

|                    |                     |
|--------------------|---------------------|
| ENSMUSG00000026565 | 10247 Pou2f1        |
| ENSMUSG00000049858 | 10248 Suox          |
| ENSMUSG00000029175 | 10249 Slc35f6       |
| ENSMUSG00000063382 | 10250 Bcl9l         |
| ENSMUSG00000044629 | 10251 Cnrip1        |
| ENSMUSG00000026888 | 10252 Grb14         |
| ENSMUSG00000086007 | 10253 1700057H21Rik |
| ENSMUSG00000006057 | 10254 Atp5g1        |
| ENSMUSG00000045659 | 10255 Plekha7       |
| ENSMUSG00000013418 | 10256 B4galnt2      |
| ENSMUSG00000097557 | 10257 C130060C02Rik |
| ENSMUSG00000031543 | 10258 Ank1          |
| ENSMUSG00000035032 | 10259 Nek11         |
| ENSMUSG00000020021 | 10260 Fgd6          |
| ENSMUSG00000020423 | 10261 Btg2          |
| ENSMUSG00000066687 | 10262 Zbtb16        |
| ENSMUSG00000040687 | 10263 Madd          |
| ENSMUSG00000043518 | 10264 Rai2          |
| ENSMUSG00000023045 | 10265 Soat2         |
| ENSMUSG00000029027 | 10266 Dffb          |
| ENSMUSG00000032271 | 10267 Nnmt          |
| ENSMUSG00000090467 | 10268 Gm4613        |
| ENSMUSG00000006219 | 10269 Fblim1        |
| ENSMUSG00000078772 | 10270 Gm12353       |
| ENSMUSG00000050668 | 10271 Gpatch11      |
| ENSMUSG00000071657 | 10272 Bsc12         |
| ENSMUSG00000043192 | 10273 Gm1840        |
| ENSMUSG00000030276 | 10274 Ttl3          |
| ENSMUSG00000042675 | 10275 Ypel3         |
| ENSMUSG00000039741 | 10276 Bahcc1        |
| ENSMUSG00000043913 | 10277 Ccdc60        |
| ENSMUSG00000073976 | 10278 1700026J12Rik |
| ENSMUSG00000053025 | 10279 Sv2b          |
| ENSMUSG00000078612 | 10280 1700024P16Rik |
| ENSMUSG00000097735 | 10281 D930032P07Rik |
| ENSMUSG00000021590 | 10282 Spata9        |
| ENSMUSG00000096916 | 10283 Zfp850        |
| ENSMUSG00000079083 | 10284 Jrkl          |
| ENSMUSG00000019082 | 10285 Slc25a22      |
| ENSMUSG00000066235 | 10286 Pomgnt2       |
| ENSMUSG00000073802 | 10287 Cdkn2b        |
| ENSMUSG00000031785 | 10288 Adgrg1        |

|                     |                     |
|---------------------|---------------------|
| ENSMUSG00000020098  | 10289 Pcbd1         |
| ENSMUSG00000087651  | 10290 1500009L16Rik |
| ENSMUSG00000052783  | 10291 Grk4          |
| ENSMUSG00000006641  | 10292 Slc5a6        |
| ENSMUSG00000087179  | 10293 Gm14230       |
| ENSMUSG00000022686  | 10294 B3gnt5        |
| ENSMUSG000000106515 | 10295 Gm30382       |
| ENSMUSG00000040987  | 10296 Mill2         |
| ENSMUSG00000020100  | 10297 Slc29a3       |
| ENSMUSG00000037031  | 10298 Tspan15       |
| ENSMUSG00000060798  | 10299 Intu          |
| ENSMUSG00000037049  | 10300 Smpd1         |
| ENSMUSG00000041836  | 10301 Ptprc         |
| ENSMUSG00000087029  | 10302 Gm14133       |
| ENSMUSG00000039307  | 10303 Hexdc         |
| ENSMUSG00000039410  | 10304 Prdm16        |
| ENSMUSG00000099407  | 10305 1700060O08Rik |
| ENSMUSG00000052516  | 10306 Robo2         |
| ENSMUSG00000057924  | 10307 Gm10033       |
| ENSMUSG00000030649  | 10308 Anapc15       |
| ENSMUSG00000097418  | 10309 Mir155hg      |
| ENSMUSG00000039648  | 10310 Ccbl1         |
| ENSMUSG00000024885  | 10311 Aldh3b1       |
| ENSMUSG00000051548  | 10312 Gm6365        |
| ENSMUSG00000020067  | 10313 Mypn          |
| ENSMUSG000000106426 | 10314 Gm36211       |
| ENSMUSG00000054675  | 10315 Tmem119       |
| ENSMUSG00000043964  | 10316 Orai3         |
| ENSMUSG00000030303  | 10317 Far2          |
| ENSMUSG00000097815  | 10318 Gm26809       |
| ENSMUSG00000039347  | 10319 Atp6v0e2      |
| ENSMUSG00000021485  | 10320 Mxd3          |
| ENSMUSG00000011148  | 10321 Adssl1        |
| ENSMUSG00000052133  | 10322 Sema5b        |
| ENSMUSG00000002103  | 10323 Acp2          |
| ENSMUSG00000027880  | 10324 Slc25a54      |
| ENSMUSG000000103649 | 10325 Gm37768       |
| ENSMUSG00000020718  | 10326 Polg2         |
| ENSMUSG00000059412  | 10327 Fxyd2         |
| ENSMUSG00000050890  | 10328 Pdik1l        |
| ENSMUSG00000056185  | 10329 Snx32         |
| ENSMUSG000000106794 | 10330 Gm43453       |

|                     |                     |
|---------------------|---------------------|
| ENSMUSG00000042155  | 10331 Klhl23        |
| ENSMUSG00000085864  | 10332 C330019F10Rik |
| ENSMUSG00000003545  | 10333 Fosb          |
| ENSMUSG00000085938  | 10334 Gm14371       |
| ENSMUSG00000028243  | 10335 Ubxn2b        |
| ENSMUSG00000050666  | 10336 Vstm4         |
| ENSMUSG00000028176  | 10337 Lrrc7         |
| ENSMUSG00000052363  | 10338 Zdhhc19       |
| ENSMUSG00000025875  | 10339 Tspan17       |
| ENSMUSG00000030545  | 10340 Pex11a        |
| ENSMUSG00000055895  | 10341 Oosp2         |
| ENSMUSG00000055200  | 10342 Sertad3       |
| ENSMUSG000000101741 | 10343 Gm28055       |
| ENSMUSG00000022076  | 10344 Klhl1         |
| ENSMUSG00000091586  | 10345 Cyp4f17       |
| ENSMUSG00000035275  | 10346 Raver2        |
| ENSMUSG00000027939  | 10347 Nup210l       |
| ENSMUSG00000026749  | 10348 Nek6          |
| ENSMUSG00000003382  | 10349 Etv3          |
| ENSMUSG00000048232  | 10350 Fbxo10        |
| ENSMUSG00000048416  | 10351 Mlf1          |
| ENSMUSG00000020363  | 10352 Gfpt2         |
| ENSMUSG00000042918  | 10353 Mamstr        |
| ENSMUSG00000054391  | 10354 4930517O19Rik |
| ENSMUSG00000030994  | 10355 D7Ertd443e    |
| ENSMUSG00000070583  | 10356 Fv1           |
| ENSMUSG000000106658 | 10357 Gm42426       |
| ENSMUSG00000047428  | 10358 Dlk2          |
| ENSMUSG00000020656  | 10359 Grhl1         |
| ENSMUSG00000042444  | 10360 Fam63b        |
| ENSMUSG00000026447  | 10361 Pik3c2b       |
| ENSMUSG00000017400  | 10362 Stac2         |
| ENSMUSG00000049717  | 10363 Lig4          |
| ENSMUSG00000041828  | 10364 Abca8a        |
| ENSMUSG00000041064  | 10365 Pif1          |
| ENSMUSG00000026955  | 10366 Sapcd2        |
| ENSMUSG00000071753  | 10367 C230004F18Rik |
| ENSMUSG00000000486  | 10368 Sept1         |
| ENSMUSG00000066892  | 10369 Fbxl12        |
| ENSMUSG00000039782  | 10370 Cpeb2         |
| ENSMUSG00000039461  | 10371 Tcta          |
| ENSMUSG00000046027  | 10372 Stard5        |

|                    |                     |
|--------------------|---------------------|
| ENSMUSG00000048249 | 10373 Crebrf        |
| ENSMUSG00000034121 | 10374 Mks1          |
| ENSMUSG00000081111 | 10375 Gm5913        |
| ENSMUSG00000026274 | 10376 Pask          |
| ENSMUSG00000013033 | 10377 Adgrl1        |
| ENSMUSG00000028850 | 10378 Gpatch3       |
| ENSMUSG00000020895 | 10379 Tmem107       |
| ENSMUSG00000064177 | 10380 Ghrl          |
| ENSMUSG00000030226 | 10381 Lmo3          |
| ENSMUSG00000032754 | 10382 Slc8b1        |
| ENSMUSG00000048997 | 10383 Atxn7l2       |
| ENSMUSG00000040855 | 10384 Repr2         |
| ENSMUSG00000032033 | 10385 Barx2         |
| ENSMUSG00000085652 | 10386 Gm11999       |
| ENSMUSG00000085675 | 10387 Gm12022       |
| ENSMUSG00000010175 | 10388 Prox1         |
| ENSMUSG00000041498 | 10389 Kif14         |
| ENSMUSG00000062031 | 10390 Athl1         |
| ENSMUSG00000038930 | 10391 Rccd1         |
| ENSMUSG00000057835 | 10392 Zfp119a       |
| ENSMUSG00000048222 | 10393 Mfap1b        |
| ENSMUSG00000060730 | 10394 Gm10086       |
| ENSMUSG00000032118 | 10395 Fez1          |
| ENSMUSG00000050382 | 10396 Kif7          |
| ENSMUSG00000051435 | 10397 Fhad1         |
| ENSMUSG00000029223 | 10398 Uchl1         |
| ENSMUSG00000059401 | 10399 Mamld1        |
| ENSMUSG00000071568 | 10400 Gm5874        |
| ENSMUSG00000047749 | 10401 Zc3hav1l      |
| ENSMUSG00000056888 | 10402 Glipr1        |
| ENSMUSG00000081308 | 10403 Gm14480       |
| ENSMUSG00000086653 | 10404 9130015L21Rik |
| ENSMUSG00000035131 | 10405 Brinp3        |
| ENSMUSG00000044017 | 10406 Adgrd1        |
| ENSMUSG00000105279 | 10407 Gm6260        |
| ENSMUSG00000002393 | 10408 Nr2f6         |
| ENSMUSG00000007987 | 10409 Ift22         |
| ENSMUSG00000059423 | 10410 Zfp933        |
| ENSMUSG00000053091 | 10411 Lins1         |
| ENSMUSG00000037143 | 10412 Cfap61        |
| ENSMUSG00000032087 | 10413 Dscaml1       |
| ENSMUSG00000025648 | 10414 Pfkfb4        |



|                    |                     |
|--------------------|---------------------|
| ENSMUSG00000022179 | 10415 4931414P19Rik |
| ENSMUSG00000074968 | 10416 Ano3          |
| ENSMUSG00000017688 | 10417 Hnf4g         |
| ENSMUSG00000030068 | 10418 Gm20696       |
| ENSMUSG00000048949 | 10419 Gm6206        |
| ENSMUSG00000026854 | 10420 Usp20         |
| ENSMUSG00000003575 | 10421 Crtc1         |
| ENSMUSG00000005907 | 10422 Pex1          |
| ENSMUSG00000038143 | 10423 Stox2         |
| ENSMUSG00000041343 | 10424 Ankrd42       |
| ENSMUSG00000090619 | 10425 Vmn2r60       |
| ENSMUSG00000072214 | 10426 Sept5         |
| ENSMUSG00000031778 | 10427 Cx3cl1        |
| ENSMUSG00000003348 | 10428 Mob3a         |
| ENSMUSG00000037946 | 10429 Fgd3          |
| ENSMUSG00000071723 | 10430 Gspt2         |
| ENSMUSG00000037172 | 10431 E330009J07Rik |
| ENSMUSG00000100153 | 10432 Gm5601        |
| ENSMUSG00000020085 | 10433 Aifm2         |
| ENSMUSG00000063087 | 10434 Gm10125       |
| ENSMUSG00000087247 | 10435 Fam150a       |
| ENSMUSG00000046862 | 10436 Pramef8       |
| ENSMUSG00000062040 | 10437 Zfp27         |
| ENSMUSG00000069733 | 10438 Ube2u         |
| ENSMUSG00000050796 | 10439 B3galt6       |
| ENSMUSG00000013997 | 10440 Nit1          |
| ENSMUSG00000048731 | 10441 Ggnbp1        |
| ENSMUSG00000038552 | 10442 Fndc4         |
| ENSMUSG00000062077 | 10443 Trim54        |
| ENSMUSG00000034777 | 10444 Vax2          |
| ENSMUSG00000026944 | 10445 Abca2         |
| ENSMUSG00000041119 | 10446 Pde9a         |
| ENSMUSG00000038608 | 10447 Dock10        |
| ENSMUSG00000028648 | 10448 Ndufs5        |
| ENSMUSG00000044881 | 10449 Coa4          |
| ENSMUSG00000036022 | 10450 Fam122b       |
| ENSMUSG00000050627 | 10451 Gpd1l         |
| ENSMUSG00000064194 | 10452 Zfp936        |
| ENSMUSG00000075289 | 10453 Carns1        |
| ENSMUSG00000050192 | 10454 Eif5a2        |
| ENSMUSG00000022893 | 10455 Adamts1       |
| ENSMUSG00000073755 | 10456 5730409E04Rik |

|                    |                  |
|--------------------|------------------|
| ENSMUSG00000064373 | 10457 Sepp1      |
| ENSMUSG00000028158 | 10458 Mttp       |
| ENSMUSG00000022664 | 10459 Slc35a5    |
| ENSMUSG00000040540 | 10460 Gm9770     |
| ENSMUSG00000072145 | 10461 BC061237   |
| ENSMUSG00000085976 | 10462 Gm13816    |
| ENSMUSG00000082456 | 10463 Gm11598    |
| ENSMUSG00000079108 | 10464 Srp54b     |
| ENSMUSG00000105144 | 10465 Rpl21-ps11 |
| ENSMUSG00000054256 | 10466 Msi1       |
| ENSMUSG00000041372 | 10467 B4galnt3   |
| ENSMUSG00000042284 | 10468 Itga1      |
| ENSMUSG00000032583 | 10469 Mon1a      |
| ENSMUSG00000036941 | 10470 Elac1      |
| ENSMUSG00000051185 | 10471 Fam174a    |
| ENSMUSG00000081377 | 10472 Gm12877    |
| ENSMUSG00000021257 | 10473 Angel1     |
| ENSMUSG00000097140 | 10474 Gm26779    |
| ENSMUSG00000022228 | 10475 Zscan26    |
| ENSMUSG00000022876 | 10476 Samsn1     |
| ENSMUSG00000026383 | 10477 Epb41l5    |
| ENSMUSG00000083109 | 10478 Gm12876    |
| ENSMUSG00000104126 | 10479 Gm37486    |
| ENSMUSG00000037419 | 10480 Endod1     |
| ENSMUSG00000079020 | 10481 Slc45a4    |
| ENSMUSG00000056938 | 10482 Acbd4      |
| ENSMUSG00000038990 | 10483 Cables2    |
| ENSMUSG00000055184 | 10484 Fam72a     |
| ENSMUSG00000026494 | 10485 Kif26b     |
| ENSMUSG00000086152 | 10486 Gm11454    |
| ENSMUSG00000103548 | 10487 Gm37670    |
| ENSMUSG00000026429 | 10488 Ube2t      |
| ENSMUSG00000032120 | 10489 C2cd2l     |
| ENSMUSG00000035151 | 10490 Elmod2     |
| ENSMUSG00000049321 | 10491 Zfp2       |
| ENSMUSG00000035172 | 10492 Plekhh3    |
| ENSMUSG00000022604 | 10493 Cep97      |
| ENSMUSG00000085596 | 10494 Gm11476    |
| ENSMUSG00000020261 | 10495 Slc36a1    |
| ENSMUSG00000087264 | 10496 Gad1os     |
| ENSMUSG00000090946 | 10497 Ccdc71l    |
| ENSMUSG00000081629 | 10498 Eif3s6-ps1 |

|                     |                     |
|---------------------|---------------------|
| ENSMUSG00000085249  | 10499 Gm12847       |
| ENSMUSG00000048240  | 10500 Gng7          |
| ENSMUSG00000025876  | 10501 Unc5a         |
| ENSMUSG00000083669  | 10502 Gm10169       |
| ENSMUSG000000105297 | 10503 Gm30852       |
| ENSMUSG00000042595  | 10504 Fam199x       |
| ENSMUSG00000028766  | 10505 Alpl          |
| ENSMUSG00000055991  | 10506 Zkscan5       |
| ENSMUSG00000023277  | 10507 Twf2          |
| ENSMUSG00000066894  | 10508 Vsig10        |
| ENSMUSG00000018589  | 10509 Glra2         |
| ENSMUSG00000040254  | 10510 Sema3d        |
| ENSMUSG00000034755  | 10511 Pcdh11x       |
| ENSMUSG00000083378  | 10512 Gm13196       |
| ENSMUSG00000056900  | 10513 Usp13         |
| ENSMUSG00000022679  | 10514 Mpv17l        |
| ENSMUSG00000027805  | 10515 Pfn2          |
| ENSMUSG00000087368  | 10516 BC065397      |
| ENSMUSG00000040133  | 10517 Gpr176        |
| ENSMUSG00000024998  | 10518 Plce1         |
| ENSMUSG00000035274  | 10519 Tpbg          |
| ENSMUSG000000105529 | 10520 Gm9480        |
| ENSMUSG00000029095  | 10521 Ablim2        |
| ENSMUSG00000049092  | 10522 Gpr137c       |
| ENSMUSG00000086931  | 10523 Gm14532       |
| ENSMUSG00000016150  | 10524 Tenm1         |
| ENSMUSG00000027843  | 10525 Ptpn22        |
| ENSMUSG00000073226  | 10526 Gm10482       |
| ENSMUSG00000027344  | 10527 Fsip1         |
| ENSMUSG00000054580  | 10528 Pla2r1        |
| ENSMUSG00000038541  | 10529 Srd5a2        |
| ENSMUSG00000087445  | 10530 Gm14286       |
| ENSMUSG00000050428  | 10531 Fbxo46        |
| ENSMUSG00000026814  | 10532 Eng           |
| ENSMUSG000000107638 | 10533 RP24-338D12.1 |
| ENSMUSG00000097746  | 10534 Gm6225        |
| ENSMUSG00000029587  | 10535 Zfp12         |
| ENSMUSG00000032717  | 10536 Mdfi          |
| ENSMUSG00000014767  | 10537 Tbp           |
| ENSMUSG00000046295  | 10538 Ankle1        |
| ENSMUSG00000020268  | 10539 Lym7          |
| ENSMUSG00000096948  | 10540 Gm4221        |

|                     |                      |
|---------------------|----------------------|
| ENSMUSG00000028133  | 10541 Rwdd3          |
| ENSMUSG00000021203  | 10542 Otub2          |
| ENSMUSG00000043659  | 10543 Npsr1          |
| ENSMUSG00000036111  | 10544 Lmo1           |
| ENSMUSG00000029413  | 10545 Naaa           |
| ENSMUSG00000060548  | 10546 Tnfrsf19       |
| ENSMUSG00000038770  | 10547 Kpna7          |
| ENSMUSG00000064325  | 10548 Hhip           |
| ENSMUSG00000097216  | 10549 4932441J04Rik  |
| ENSMUSG00000087598  | 10550 Zfp111         |
| ENSMUSG00000000439  | 10551 Mkrn2          |
| ENSMUSG00000039377  | 10552 Hlx            |
| ENSMUSG00000025083  | 10553 Afap1l2        |
| ENSMUSG00000015127  | 10554 Unkl           |
| ENSMUSG00000058248  | 10555 Kcnh1          |
| ENSMUSG000000101505 | 10556 1700109G14Rik  |
| ENSMUSG00000021809  | 10557 Nudt13         |
| ENSMUSG00000078816  | 10558 Prkcg          |
| ENSMUSG00000029575  | 10559 Mmab           |
| ENSMUSG00000087059  | 10560 Gm12339        |
| ENSMUSG00000035279  | 10561 Ssc5d          |
| ENSMUSG00000041012  | 10562 Cmtm8          |
| ENSMUSG00000037032  | 10563 Apbb1          |
| ENSMUSG00000022783  | 10564 Spag6          |
| ENSMUSG000000100534 | 10565 Gm816          |
| ENSMUSG00000099639  | 10566 1700084F23Rik  |
| ENSMUSG00000022206  | 10567 Npr3           |
| ENSMUSG00000026708  | 10568 Cenpl          |
| ENSMUSG00000037509  | 10569 Arhgef4        |
| ENSMUSG00000005267  | 10570 Zfp287         |
| ENSMUSG00000094568  | 10571 Smarce1-ps1    |
| ENSMUSG000000108584 | 10572 RP23-190H11.11 |
| ENSMUSG00000035184  | 10573 Fam124a        |
| ENSMUSG00000021846  | 10574 Peli2          |
| ENSMUSG00000027478  | 10575 Dnmt3b         |
| ENSMUSG00000094441  | 10576 Zfp955a        |
| ENSMUSG00000033781  | 10577 Asb13          |
| ENSMUSG00000053508  | 10578 BC048502       |
| ENSMUSG00000050605  | 10579 Zfp61          |
| ENSMUSG00000048458  | 10580 Fam212b        |
| ENSMUSG00000029765  | 10581 Plxna4         |
| ENSMUSG00000042401  | 10582 Crtac1         |

|                    |                     |
|--------------------|---------------------|
| ENSMUSG00000072494 | 10583 Ppp1r3e       |
| ENSMUSG00000020034 | 10584 Tcp11l2       |
| ENSMUSG00000058159 | 10585 T2            |
| ENSMUSG00000022464 | 10586 Slc38a4       |
| ENSMUSG00000092600 | 10587 Gm20442       |
| ENSMUSG00000053128 | 10588 Rnf26         |
| ENSMUSG00000050944 | 10589 Efcab5        |
| ENSMUSG00000026816 | 10590 Gtf3c5        |
| ENSMUSG00000022197 | 10591 Pdzd2         |
| ENSMUSG00000025268 | 10592 Maged2        |
| ENSMUSG00000078780 | 10593 Gm5150        |
| ENSMUSG00000086903 | 10594 Hotair        |
| ENSMUSG00000096965 | 10595 3300005D01Rik |
| ENSMUSG00000030207 | 10596 Fam234b       |
| ENSMUSG00000021125 | 10597 Arg2          |
| ENSMUSG00000066113 | 10598 Adamtsl1      |
| ENSMUSG00000025577 | 10599 Cbx2          |
| ENSMUSG00000026792 | 10600 Lrsam1        |
| ENSMUSG00000030614 | 10601 Tmem126b      |
| ENSMUSG00000023571 | 10602 Fam132a       |
| ENSMUSG00000020937 | 10603 Plcd3         |
| ENSMUSG00000029212 | 10604 Gabrb1        |
| ENSMUSG00000030281 | 10605 Il17rc        |
| ENSMUSG00000097855 | 10606 A930007I19Rik |
| ENSMUSG00000024066 | 10607 Xdh           |
| ENSMUSG00000038260 | 10608 Trpm4         |
| ENSMUSG00000040181 | 10609 Fmo1          |
| ENSMUSG00000032530 | 10610 Lyzl4         |
| ENSMUSG00000028226 | 10611 Mmp16         |
| ENSMUSG00000020131 | 10612 Pcsk4         |
| ENSMUSG00000023044 | 10613 Csad          |
| ENSMUSG00000071456 | 10614 1110002L01Rik |
| ENSMUSG00000021754 | 10615 Map3k1        |
| ENSMUSG00000029276 | 10616 Glmn          |
| ENSMUSG00000000489 | 10617 Pdgb          |
| ENSMUSG00000031903 | 10618 Pla2g15       |
| ENSMUSG00000049134 | 10619 Nrap          |
| ENSMUSG00000014164 | 10620 Klhl3         |
| ENSMUSG00000033902 | 10621 Mapkbp1       |
| ENSMUSG00000090266 | 10622 Mettl23       |
| ENSMUSG00000021182 | 10623 Ccdc88c       |
| ENSMUSG00000022362 | 10624 Gm29394       |

|                     |                     |
|---------------------|---------------------|
| ENSMUSG00000060508  | 10625 Nlrp9b        |
| ENSMUSG00000032911  | 10626 Cspg4         |
| ENSMUSG00000007950  | 10627 Abhd8         |
| ENSMUSG000000042961 | 10628 Egflam        |
| ENSMUSG000000103308 | 10629 Gm37800       |
| ENSMUSG000000078154 | 10630 Gm12184       |
| ENSMUSG000000059857 | 10631 Ntng1         |
| ENSMUSG000000040187 | 10632 Arntl2        |
| ENSMUSG000000021130 | 10633 Galnt16       |
| ENSMUSG000000021553 | 10634 Slc28a3       |
| ENSMUSG000000028015 | 10635 Ctso          |
| ENSMUSG000000065422 | 10636 Mir221        |
| ENSMUSG000000045672 | 10637 Col27a1       |
| ENSMUSG000000024217 | 10638 Snrpc         |
| ENSMUSG000000097756 | 10639 A730056A06Rik |
| ENSMUSG000000108569 | 10640 RP23-44H21.1  |
| ENSMUSG000000022199 | 10641 Slc22a17      |
| ENSMUSG000000045790 | 10642 Ccdc149       |
| ENSMUSG000000048388 | 10643 Fam171b       |
| ENSMUSG000000069379 | 10644 Gm4950        |
| ENSMUSG000000068134 | 10645 Zfp120        |
| ENSMUSG000000015962 | 10646 1700016C15Rik |
| ENSMUSG000000098404 | 10647 Mrip-ps       |
| ENSMUSG000000028862 | 10648 Map3k6        |
| ENSMUSG000000022915 | 10649 1700093J21Rik |
| ENSMUSG000000016624 | 10650 Phf21b        |
| ENSMUSG000000071281 | 10651 Zfp65         |
| ENSMUSG000000102674 | 10652 8030442B05Rik |
| ENSMUSG000000004070 | 10653 Hmox2         |
| ENSMUSG000000019828 | 10654 Grm1          |
| ENSMUSG000000030604 | 10655 Zfp626        |
| ENSMUSG000000041193 | 10656 Pla2g5        |
| ENSMUSG000000027890 | 10657 Gstm4         |
| ENSMUSG000000071552 | 10658 Tigit         |
| ENSMUSG000000009097 | 10659 Tbx1          |
| ENSMUSG000000043702 | 10660 Pde12         |
| ENSMUSG000000021483 | 10661 Cdk20         |
| ENSMUSG000000040606 | 10662 Kazn          |
| ENSMUSG000000079429 | 10663 Mroh2a        |
| ENSMUSG000000052353 | 10664 Cemip         |
| ENSMUSG000000037552 | 10665 Plekhg2       |
| ENSMUSG000000079317 | 10666 Trappc2       |

|                    |                     |
|--------------------|---------------------|
| ENSMUSG00000032285 | 10667 Dnaja4        |
| ENSMUSG00000041079 | 10668 Rwdd2b        |
| ENSMUSG00000092072 | 10669 Gm4540        |
| ENSMUSG00000047181 | 10670 Samd14        |
| ENSMUSG00000100605 | 10671 Gm29243       |
| ENSMUSG00000097375 | 10672 6720427I07Rik |
| ENSMUSG00000009394 | 10673 Syn2          |
| ENSMUSG00000097469 | 10674 Gm26733       |
| ENSMUSG00000063328 | 10675 Gm9396        |
| ENSMUSG00000083557 | 10676 Gm6877        |
| ENSMUSG00000027381 | 10677 Bcl2l11       |
| ENSMUSG00000052676 | 10678 Zmat1         |
| ENSMUSG00000098749 | 10679 Gm27477       |
| ENSMUSG00000018841 | 10680 Rad51d        |
| ENSMUSG00000025610 | 10681 Map3k7cl      |
| ENSMUSG00000091549 | 10682 Gm6548        |
| ENSMUSG00000027583 | 10683 Zbtb46        |
| ENSMUSG00000043068 | 10684 Fam89a        |
| ENSMUSG00000051373 | 10685 Ppapdc3       |
| ENSMUSG00000028458 | 10686 Tesk1         |
| ENSMUSG00000001666 | 10687 Ddt           |
| ENSMUSG00000050390 | 10688 C77080        |
| ENSMUSG00000070427 | 10689 Il18bp        |
| ENSMUSG00000020432 | 10690 Tcn2          |
| ENSMUSG00000097307 | 10691 Gm26834       |
| ENSMUSG00000002257 | 10692 Def6          |
| ENSMUSG00000015533 | 10693 Itga2         |
| ENSMUSG00000052281 | 10694 Tspan32os     |
| ENSMUSG00000021928 | 10695 Ebp1          |
| ENSMUSG00000040867 | 10696 Begain        |
| ENSMUSG00000059422 | 10697 Gm8116        |
| ENSMUSG00000002980 | 10698 Bcam          |
| ENSMUSG00000090075 | 10699 Gm16251       |
| ENSMUSG00000022132 | 10700 Cldn10        |
| ENSMUSG00000001323 | 10701 Srr           |
| ENSMUSG00000020901 | 10702 Pik3r5        |
| ENSMUSG00000035211 | 10703 Xrra1         |
| ENSMUSG00000017764 | 10704 Zswim1        |
| ENSMUSG00000035790 | 10705 Cep19         |
| ENSMUSG00000055652 | 10706 Khl125        |
| ENSMUSG00000049832 | 10707 Gm9840        |
| ENSMUSG00000043190 | 10708 Rfesd         |

|                     |                     |
|---------------------|---------------------|
| ENSMUSG00000067430  | 10709 Zfp763        |
| ENSMUSG00000001942  | 10710 Siae          |
| ENSMUSG00000047227  | 10711 Gm527         |
| ENSMUSG00000078451  | 10712 Ppil6         |
| ENSMUSG00000030782  | 10713 Tgfb1i1       |
| ENSMUSG00000026923  | 10714 Notch1        |
| ENSMUSG00000037846  | 10715 Rtkn2         |
| ENSMUSG00000026785  | 10716 Pkn3          |
| ENSMUSG00000020654  | 10717 Adcy3         |
| ENSMUSG00000026273  | 10718 Mterf4        |
| ENSMUSG00000029664  | 10719 Tfpi2         |
| ENSMUSG00000030089  | 10720 Slc41a3       |
| ENSMUSG000000091639 | 10721 Gm3756        |
| ENSMUSG00000020143  | 10722 Dock2         |
| ENSMUSG00000027957  | 10723 Slc35a3       |
| ENSMUSG000000097313 | 10724 Gm26569       |
| ENSMUSG000000094685 | 10725 Gm5900        |
| ENSMUSG000000101832 | 10726 Gm28982       |
| ENSMUSG00000034471  | 10727 Caskin2       |
| ENSMUSG000000086693 | 10728 A730081D07Rik |
| ENSMUSG00000020227  | 10729 Irak3         |
| ENSMUSG00000021271  | 10730 Zfp839        |
| ENSMUSG00000075391  | 10731 Gm13443       |
| ENSMUSG00000072066  | 10732 6720489N17Rik |
| ENSMUSG00000046994  | 10733 Mars2         |
| ENSMUSG00000079056  | 10734 Kcnip3        |
| ENSMUSG00000037438  | 10735 Gm9763        |
| ENSMUSG000000052276 | 10736 Ostn          |
| ENSMUSG000000085750 | 10737 Gm14009       |
| ENSMUSG000000097354 | 10738 2310001H17Rik |
| ENSMUSG000000062310 | 10739 Glrp1         |
| ENSMUSG00000033174  | 10740 Mgl1          |
| ENSMUSG000000062300 | 10741 Pvrl2         |
| ENSMUSG00000037683  | 10742 Armc3         |
| ENSMUSG000000084342 | 10743 Gm11224       |
| ENSMUSG00000037991  | 10744 Rmi2          |
| ENSMUSG000000083325 | 10745 Gm14121       |
| ENSMUSG000000057895 | 10746 Zfp105        |
| ENSMUSG00000078813  | 10747 Leng1         |
| ENSMUSG000000036957 | 10748 Lfn3          |
| ENSMUSG00000029708  | 10749 Gcc1          |
| ENSMUSG00000036570  | 10750 Fxyd1         |



|                      |                     |
|----------------------|---------------------|
| ENSMUSG00000014361   | 10751 Mertk         |
| ENSMUSG00000108621   | 10752 Gm37494       |
| ENSMUSG00000031292   | 10753 Cdkl5         |
| ENSMUSG000000086155  | 10754 9430041J12Rik |
| ENSMUSG000000086699  | 10755 Gm16510       |
| ENSMUSG000000069727  | 10756 Gm5595        |
| ENSMUSG000000001053  | 10757 N4bp3         |
| ENSMUSG000000049657  | 10758 Zbtb5         |
| ENSMUSG000000022219  | 10759 Cideb         |
| ENSMUSG000000030313  | 10760 Dennd5b       |
| ENSMUSG000000070283  | 10761 Ndufaf3       |
| ENSMUSG000000105789  | 10762 Gm42997       |
| ENSMUSG000000083159  | 10763 Gm12180       |
| ENSMUSG000000011427  | 10764 Zfp790        |
| ENSMUSG000000026077  | 10765 Npas2         |
| ENSMUSG0000000057173 | 10766 Rfx8          |
| ENSMUSG000000020397  | 10767 Med7          |
| ENSMUSG000000018405  | 10768 Mrm1          |
| ENSMUSG0000000085719 | 10769 4933424L21Rik |
| ENSMUSG000000075020  | 10770 E530001K10Rik |
| ENSMUSG000000020658  | 10771 Efr3b         |
| ENSMUSG0000000086942 | 10772 Gm15489       |
| ENSMUSG000000028369  | 10773 Slep1         |
| ENSMUSG000000029507  | 10774 Pus1          |
| ENSMUSG000000028838  | 10775 Extl1         |
| ENSMUSG000000029359  | 10776 Tesc          |
| ENSMUSG000000039253  | 10777 Fn3krp        |
| ENSMUSG000000039086  | 10778 Ss18l1        |
| ENSMUSG000000026925  | 10779 Inpp5e        |
| ENSMUSG000000027959  | 10780 Sass6         |
| ENSMUSG0000000086240 | 10781 Gm7846        |
| ENSMUSG000000038642  | 10782 Ctss          |
| ENSMUSG000000032850  | 10783 Rnft2         |
| ENSMUSG000000045822  | 10784 Zswim3        |
| ENSMUSG000000028389  | 10785 Zfp37         |
| ENSMUSG000000106230  | 10786 Gm29811       |
| ENSMUSG000000036949  | 10787 Slc39a12      |
| ENSMUSG000000028467  | 10788 Gba2          |
| ENSMUSG000000066829  | 10789 Zfp810        |
| ENSMUSG000000108322  | 10790 RP23-455C13.7 |
| ENSMUSG000000038894  | 10791 Irs2          |
| ENSMUSG000000040387  | 10792 Kihl32        |

|                     |                     |
|---------------------|---------------------|
| ENSMUSG00000035367  | 10793 Rmi1          |
| ENSMUSG00000075395  | 10794 A630010A05Rik |
| ENSMUSG00000064193  | 10795 Gm4735        |
| ENSMUSG00000031997  | 10796 Trpc6         |
| ENSMUSG00000089129  | 10797 Gm26407       |
| ENSMUSG00000033676  | 10798 Gabrb3        |
| ENSMUSG00000087197  | 10799 Gm13780       |
| ENSMUSG00000034738  | 10800 Nostrin       |
| ENSMUSG00000026556  | 10801 Vangl2        |
| ENSMUSG00000074466  | 10802 Gm15417       |
| ENSMUSG00000031273  | 10803 Col4a6        |
| ENSMUSG00000023284  | 10804 Zfp605        |
| ENSMUSG000000104217 | 10805 Gm37988       |
| ENSMUSG00000086585  | 10806 Gm16126       |
| ENSMUSG00000051517  | 10807 Arhgef39      |
| ENSMUSG00000074576  | 10808 Mocs3         |
| ENSMUSG00000028804  | 10809 Csmd2         |
| ENSMUSG00000073460  | 10810 Pnlcd1        |
| ENSMUSG00000000056  | 10811 Narf          |
| ENSMUSG00000031481  | 10812 Tpte          |
| ENSMUSG00000085165  | 10813 Gm12089       |
| ENSMUSG00000047907  | 10814 Tshz2         |
| ENSMUSG00000087176  | 10815 D230022J07Rik |
| ENSMUSG00000031666  | 10816 Rbl2          |
| ENSMUSG00000083219  | 10817 Gm11410       |
| ENSMUSG00000040694  | 10818 Apobec2       |
| ENSMUSG00000040325  | 10819 Vprbp         |
| ENSMUSG00000091449  | 10820 Gm10269       |
| ENSMUSG00000051977  | 10821 Prdm9         |
| ENSMUSG00000050150  | 10822 Slc9b1        |
| ENSMUSG00000052713  | 10823 Zfp608        |
| ENSMUSG00000050122  | 10824 Vwa3b         |
| ENSMUSG00000034324  | 10825 Tmem132c      |
| ENSMUSG00000063646  | 10826 Jakmip1       |
| ENSMUSG00000025158  | 10827 Rfng          |
| ENSMUSG00000028909  | 10828 Ptpu          |
| ENSMUSG000000102897 | 10829 Gm37853       |
| ENSMUSG00000062646  | 10830 Ganc          |
| ENSMUSG00000026688  | 10831 Mgst3         |
| ENSMUSG00000031387  | 10832 Renbp         |
| ENSMUSG00000026648  | 10833 Dclre1c       |
| ENSMUSG00000043673  | 10834 Kcns3         |

|                    |                     |
|--------------------|---------------------|
| ENSMUSG00000047583 | 10835 Tyw3          |
| ENSMUSG00000032577 | 10836 Mapkapk3      |
| ENSMUSG00000034957 | 10837 Cebpa         |
| ENSMUSG00000071855 | 10838 Ccdc112       |
| ENSMUSG00000054967 | 10839 Zfp647        |
| ENSMUSG00000064280 | 10840 Ccdc146       |
| ENSMUSG00000018931 | 10841 Natd1         |
| ENSMUSG00000005699 | 10842 Pard6a        |
| ENSMUSG00000029343 | 10843 Crybb1        |
| ENSMUSG00000021209 | 10844 Ppp4r4        |
| ENSMUSG00000046556 | 10845 Zfp319        |
| ENSMUSG00000019815 | 10846 Zc2hc1b       |
| ENSMUSG00000027456 | 10847 Sdcbp2        |
| ENSMUSG00000046057 | 10848 Gm15428       |
| ENSMUSG00000005373 | 10849 Mlxipl        |
| ENSMUSG00000079467 | 10850 Gm14966       |
| ENSMUSG00000056508 | 10851 1700001K19Rik |
| ENSMUSG00000048581 | 10852 E130311K13Rik |
| ENSMUSG00000032860 | 10853 P2ry2         |
| ENSMUSG00000068335 | 10854 Dok1          |
| ENSMUSG00000025352 | 10855 Gdf11         |
| ENSMUSG00000047786 | 10856 Lix1          |
| ENSMUSG00000079697 | 10857 Gm5751        |
| ENSMUSG00000047115 | 10858 Fam221a       |
| ENSMUSG00000070806 | 10859 Zmynd12       |
| ENSMUSG00000100204 | 10860 Gm4849        |
| ENSMUSG00000086477 | 10861 Gm15506       |
| ENSMUSG00000052605 | 10862 Isoc2b        |
| ENSMUSG00000043943 | 10863 Naalad2       |
| ENSMUSG00000022215 | 10864 Fitm1         |
| ENSMUSG00000073889 | 10865 Il11ra1       |
| ENSMUSG00000041741 | 10866 Pde3a         |
| ENSMUSG00000013973 | 10867 Dedd          |
| ENSMUSG00000073968 | 10868 Trim68        |
| ENSMUSG00000103953 | 10869 Gm29718       |
| ENSMUSG00000091947 | 10870 6530401F13Rik |
| ENSMUSG00000018427 | 10871 Ypel2         |
| ENSMUSG00000079262 | 10872 Slco1a6       |
| ENSMUSG00000040836 | 10873 Gpr161        |
| ENSMUSG00000029385 | 10874 Ccng2         |
| ENSMUSG00000031832 | 10875 Taf1c         |
| ENSMUSG00000051111 | 10876 Sv2c          |

|                     |                     |
|---------------------|---------------------|
| ENSMUSG00000027298  | 10877 Tyro3         |
| ENSMUSG00000026259  | 10878 Ngef          |
| ENSMUSG00000085467  | 10879 Gm11842       |
| ENSMUSG00000076435  | 10880 Acsf2         |
| ENSMUSG00000032598  | 10881 Nckipsd       |
| ENSMUSG00000038422  | 10882 Hdhd3         |
| ENSMUSG00000004043  | 10883 Stat5a        |
| ENSMUSG00000021876  | 10884 Rnase4        |
| ENSMUSG00000060424  | 10885 Pantr1        |
| ENSMUSG000000101583 | 10886 Gm20753       |
| ENSMUSG00000031398  | 10887 Plxna3        |
| ENSMUSG00000014776  | 10888 Nol3          |
| ENSMUSG00000024777  | 10889 Ppp2r5b       |
| ENSMUSG00000097994  | 10890 Gm26982       |
| ENSMUSG000000100222 | 10891 Psmb6-ps2     |
| ENSMUSG00000070315  | 10892 4930581F22Rik |
| ENSMUSG00000083454  | 10893 Gm13226       |
| ENSMUSG00000041794  | 10894 Myrip         |
| ENSMUSG00000032182  | 10895 Yipf2         |
| ENSMUSG00000036622  | 10896 Atp13a2       |
| ENSMUSG00000036819  | 10897 Jmjd4         |
| ENSMUSG00000098304  | 10898 1700027I24Rik |
| ENSMUSG00000031298  | 10899 Adgrg2        |
| ENSMUSG00000020635  | 10900 Fkbp1b        |
| ENSMUSG00000046993  | 10901 Gm5637        |
| ENSMUSG00000097804  | 10902 Gm16685       |
| ENSMUSG00000021418  | 10903 Rpp40         |
| ENSMUSG00000059511  | 10904 Gm20563       |
| ENSMUSG00000057778  | 10905 Cyb5d2        |
| ENSMUSG00000027534  | 10906 Snx16         |
| ENSMUSG00000090319  | 10907 Gm4462        |
| ENSMUSG00000034573  | 10908 Ptpn13        |
| ENSMUSG00000037161  | 10909 Mgarpl        |
| ENSMUSG00000066640  | 10910 Fbxl18        |
| ENSMUSG00000021786  | 10911 Oxsm          |
| ENSMUSG00000030562  | 10912 Nox4          |
| ENSMUSG00000022323  | 10913 Hrsp12        |
| ENSMUSG00000010362  | 10914 Rdm1          |
| ENSMUSG00000024594  | 10915 Prrc1         |
| ENSMUSG00000062519  | 10916 Zfp398        |
| ENSMUSG00000073176  | 10917 Zfp449        |
| ENSMUSG00000097530  | 10918 Kansl2-ps     |

|                     |                     |
|---------------------|---------------------|
| ENSMUSG00000074282  | 10919 Zfp94         |
| ENSMUSG00000045107  | 10920 Saysd1        |
| ENSMUSG00000053175  | 10921 Bcl3          |
| ENSMUSG00000022394  | 10922 L3mbtl2       |
| ENSMUSG00000033883  | 10923 D3Ertd254e    |
| ENSMUSG00000019102  | 10924 Aldh3a1       |
| ENSMUSG00000027954  | 10925 Efna1         |
| ENSMUSG00000049728  | 10926 Zfp668        |
| ENSMUSG00000028992  | 10927 Nmnat1        |
| ENSMUSG00000014778  | 10928 Fhod1         |
| ENSMUSG00000020014  | 10929 Cfap54        |
| ENSMUSG00000083902  | 10930 Gm15975       |
| ENSMUSG00000000901  | 10931 Mmp11         |
| ENSMUSG00000086485  | 10932 Gm15458       |
| ENSMUSG00000073910  | 10933 Mob3b         |
| ENSMUSG00000024512  | 10934 Dynap         |
| ENSMUSG00000096910  | 10935 Zfp955b       |
| ENSMUSG00000031709  | 10936 Tbc1d9        |
| ENSMUSG00000041362  | 10937 Shtn1         |
| ENSMUSG00000008129  | 10938 4930432K21Rik |
| ENSMUSG00000029769  | 10939 Ccdc136       |
| ENSMUSG00000097217  | 10940 Gm26549       |
| ENSMUSG00000020877  | 10941 Scrn2         |
| ENSMUSG00000071796  | 10942 6820431F20Rik |
| ENSMUSG00000039954  | 10943 Stk32a        |
| ENSMUSG00000071637  | 10944 Cebpd         |
| ENSMUSG00000041966  | 10945 Dcaf17        |
| ENSMUSG00000010358  | 10946 Ifi35         |
| ENSMUSG00000013091  | 10947 Tmem190       |
| ENSMUSG00000081967  | 10948 Gm14017       |
| ENSMUSG00000033488  | 10949 BC026585      |
| ENSMUSG00000082906  | 10950 Smt3h1-ps     |
| ENSMUSG00000067653  | 10951 Ankrd23       |
| ENSMUSG000000102191 | 10952 Gm36569       |
| ENSMUSG00000080832  | 10953 M6pr-ps       |
| ENSMUSG00000018678  | 10954 Sp2           |
| ENSMUSG00000024837  | 10955 Dmrt1         |
| ENSMUSG00000079681  | 10956 Zglp1         |
| ENSMUSG00000098507  | 10957 Gm27935       |
| ENSMUSG00000067276  | 10958 Capn6         |
| ENSMUSG00000029838  | 10959 Ptn           |
| ENSMUSG00000040613  | 10960 Apobec1       |

|                    |                     |
|--------------------|---------------------|
| ENSMUSG00000004626 | 10961 Stxbp2        |
| ENSMUSG00000094845 | 10962 Tmem95        |
| ENSMUSG00000087362 | 10963 Gm13710       |
| ENSMUSG00000048206 | 10964 Dnajb8        |
| ENSMUSG00000073144 | 10965 4930599N23Rik |
| ENSMUSG00000102669 | 10966 Gm42415       |
| ENSMUSG00000043972 | 10967 Opn5          |
| ENSMUSG00000003198 | 10968 Zfp959        |
| ENSMUSG00000106892 | 10969 Gm42791       |
| ENSMUSG00000027971 | 10970 Ndst4         |
| ENSMUSG00000016498 | 10971 Pcd1lg2       |
| ENSMUSG00000030688 | 10972 Stard10       |
| ENSMUSG00000022371 | 10973 Col14a1       |
| ENSMUSG00000057766 | 10974 Ankrd29       |
| ENSMUSG00000041679 | 10975 Lrrc29        |
| ENSMUSG00000018727 | 10976 Cpsf4l        |
| ENSMUSG00000009487 | 10977 Otog          |
| ENSMUSG00000039577 | 10978 Nphp4         |
| ENSMUSG00000032558 | 10979 Nphp3         |
| ENSMUSG00000056987 | 10980 Fam71d        |
| ENSMUSG00000108793 | 10981 RP24-117C3.2  |
| ENSMUSG00000050549 | 10982 5730508B09Rik |
| ENSMUSG00000020182 | 10983 Ddc           |
| ENSMUSG00000023452 | 10984 Pisd          |
| ENSMUSG00000039623 | 10985 Ap5z1         |
| ENSMUSG00000032020 | 10986 Ubash3b       |
| ENSMUSG00000003352 | 10987 Cacnb3        |
| ENSMUSG00000017057 | 10988 Il13ra1       |
| ENSMUSG00000036854 | 10989 Hspb6         |
| ENSMUSG00000038797 | 10990 Zscan2        |
| ENSMUSG00000002416 | 10991 Ndufb2        |
| ENSMUSG00000009739 | 10992 Pou6f1        |
| ENSMUSG00000032369 | 10993 Plscr1        |
| ENSMUSG00000084145 | 10994 Gm12263       |
| ENSMUSG00000029047 | 10995 Pex10         |
| ENSMUSG00000044229 | 10996 Nxpe4         |
| ENSMUSG00000041247 | 10997 Lamp3         |
| ENSMUSG00000034320 | 10998 Slc26a2       |
| ENSMUSG00000097061 | 10999 9330151L19Rik |
| ENSMUSG00000094083 | 11000 Gm1604a       |
| ENSMUSG00000056458 | 11001 Mok           |
| ENSMUSG00000041607 | 11002 Mbp           |

|                     |                     |
|---------------------|---------------------|
| ENSMUSG00000027173  | 11003 Depdc7        |
| ENSMUSG00000048834  | 11004 Vstm2a        |
| ENSMUSG00000037541  | 11005 Shank2        |
| ENSMUSG00000019966  | 11006 Kitl          |
| ENSMUSG00000066838  | 11007 Zfp772        |
| ENSMUSG00000079509  | 11008 Zfx           |
| ENSMUSG00000059554  | 11009 Ccdc28a       |
| ENSMUSG00000035769  | 11010 Xylb          |
| ENSMUSG00000029098  | 11011 Acox3         |
| ENSMUSG000000106257 | 11012 Gm9023        |
| ENSMUSG00000027748  | 11013 Trpc4         |
| ENSMUSG00000026768  | 11014 Itga8         |
| ENSMUSG00000033182  | 11015 Kbtbd12       |
| ENSMUSG00000027316  | 11016 Gfra4         |
| ENSMUSG00000046709  | 11017 Mapk10        |
| ENSMUSG00000028518  | 11018 Prkaa2        |
| ENSMUSG00000022221  | 11019 Ripk3         |
| ENSMUSG00000043633  | 11020 Fam221b       |
| ENSMUSG000000103597 | 11021 Gm19777       |
| ENSMUSG00000042766  | 11022 Trim46        |
| ENSMUSG00000001763  | 11023 Tspan33       |
| ENSMUSG00000034394  | 11024 Lif           |
| ENSMUSG000000100714 | 11025 2010308F09Rik |
| ENSMUSG00000097577  | 11026 6230400D17Rik |
| ENSMUSG00000037007  | 11027 Zfp113        |
| ENSMUSG00000031266  | 11028 Gla           |
| ENSMUSG00000039114  | 11029 Nrn1          |
| ENSMUSG00000059842  | 11030 Zfp341        |
| ENSMUSG00000048482  | 11031 Bdnf          |
| ENSMUSG00000020102  | 11032 Slc16a7       |
| ENSMUSG00000039699  | 11033 Batf2         |
| ENSMUSG00000048120  | 11034 Entpd1        |
| ENSMUSG00000059816  | 11035 Fam159a       |
| ENSMUSG00000007837  | 11036 Prrg2         |
| ENSMUSG00000095464  | 11037 Gm21987       |
| ENSMUSG000000104491 | 11038 Gm32340       |
| ENSMUSG00000067161  | 11039 Gm5560        |
| ENSMUSG00000024769  | 11040 Cdc42bpg      |
| ENSMUSG00000026311  | 11041 Asb1          |
| ENSMUSG00000097887  | 11042 Gm26542       |
| ENSMUSG00000054320  | 11043 Lrrc36        |
| ENSMUSG00000006576  | 11044 Slc4a3        |

|                    |                     |
|--------------------|---------------------|
| ENSMUSG00000061536 | 11045 Sec22c        |
| ENSMUSG00000072653 | 11046 Zfp783        |
| ENSMUSG00000072944 | 11047 Nup62cl       |
| ENSMUSG00000071419 | 11048 Rps15-ps2     |
| ENSMUSG00000019464 | 11049 Ptger1        |
| ENSMUSG00000052125 | 11050 F730043M19Rik |
| ENSMUSG00000051098 | 11051 Mblac2        |
| ENSMUSG00000081233 | 11052 Gm12857       |
| ENSMUSG00000051427 | 11053 Ccdc157       |
| ENSMUSG00000036526 | 11054 Card11        |
| ENSMUSG00000062081 | 11055 Gm6055        |
| ENSMUSG00000071342 | 11056 Lsmem1        |
| ENSMUSG00000068742 | 11057 Cry2          |
| ENSMUSG00000048772 | 11058 Tmem53        |
| ENSMUSG00000074682 | 11059 Zcchc3        |
| ENSMUSG00000022836 | 11060 Mylk          |
| ENSMUSG00000050840 | 11061 Cdh20         |
| ENSMUSG00000020169 | 11062 Best3         |
| ENSMUSG00000003153 | 11063 Slc2a3        |
| ENSMUSG00000041477 | 11064 Dcp1b         |
| ENSMUSG00000002006 | 11065 Pdzd4         |
| ENSMUSG00000025425 | 11066 St8sia5       |
| ENSMUSG00000035390 | 11067 Brsk1         |
| ENSMUSG00000038225 | 11068 Primpol       |
| ENSMUSG00000031951 | 11069 Tmem231       |
| ENSMUSG00000029386 | 11070 Tctn2         |
| ENSMUSG00000053161 | 11071 Daw1          |
| ENSMUSG00000043162 | 11072 Pyurf         |
| ENSMUSG00000045648 | 11073 Vwc2l         |
| ENSMUSG00000038702 | 11074 Dsel          |
| ENSMUSG00000062209 | 11075 Erbb4         |
| ENSMUSG00000056234 | 11076 Ncoa4         |
| ENSMUSG00000000409 | 11077 Lck           |
| ENSMUSG00000043668 | 11078 Tox3          |
| ENSMUSG00000068794 | 11079 Col28a1       |
| ENSMUSG00000107852 | 11080 RP23-88E13.2  |
| ENSMUSG00000048856 | 11081 Slc25a47      |
| ENSMUSG00000044633 | 11082 B530045E10Rik |
| ENSMUSG00000020893 | 11083 Per1          |
| ENSMUSG00000040231 | 11084 Syngr4        |
| ENSMUSG00000028028 | 11085 Alpk1         |
| ENSMUSG00000045691 | 11086 Thtpa         |



|                    |                     |
|--------------------|---------------------|
| ENSMUSG00000026479 | 11087 Lamc2         |
| ENSMUSG00000054659 | 11088 Pm20d2        |
| ENSMUSG00000054280 | 11089 Prr14l        |
| ENSMUSG00000052915 | 11090 Msl1          |
| ENSMUSG00000035126 | 11091 Wdr78         |
| ENSMUSG00000102525 | 11092 Gm37784       |
| ENSMUSG00000060716 | 11093 Plekhh1       |
| ENSMUSG00000042213 | 11094 Zfand4        |
| ENSMUSG00000002475 | 11095 Abhd3         |
| ENSMUSG00000104082 | 11096 Gm7115        |
| ENSMUSG00000050373 | 11097 Snx21         |
| ENSMUSG00000041132 | 11098 N4bp2l1       |
| ENSMUSG00000029499 | 11099 Pxmp2         |
| ENSMUSG00000023873 | 11100 1700010l14Rik |
| ENSMUSG00000021238 | 11101 Aldh6a1       |
| ENSMUSG00000041025 | 11102 Iffo2         |
| ENSMUSG00000041849 | 11103 Card6         |
| ENSMUSG00000020668 | 11104 Kif3c         |
| ENSMUSG00000029409 | 11105 U90926        |
| ENSMUSG00000006850 | 11106 Tmco6         |
| ENSMUSG00000036863 | 11107 Syde2         |
| ENSMUSG00000073609 | 11108 D2hgdh        |
| ENSMUSG00000053192 | 11109 Mllt11        |
| ENSMUSG00000085264 | 11110 Gm15581       |
| ENSMUSG00000032243 | 11111 Itga11        |
| ENSMUSG00000108331 | 11112 RP24-138O17.5 |
| ENSMUSG00000079988 | 11113 Gm11970       |
| ENSMUSG00000048106 | 11114 4632415L05Rik |
| ENSMUSG00000023367 | 11115 Tmem176a      |
| ENSMUSG00000100691 | 11116 2010320M18Rik |
| ENSMUSG00000024130 | 11117 Abca3         |
| ENSMUSG00000033066 | 11118 Gas7          |
| ENSMUSG00000100001 | 11119 1810007D17Rik |
| ENSMUSG00000071103 | 11120 1700029J07Rik |
| ENSMUSG00000043929 | 11121 Klhl15        |
| ENSMUSG00000023336 | 11122 Wfdc1         |
| ENSMUSG00000020072 | 11123 Pbl2          |
| ENSMUSG00000030494 | 11124 Rhpn2         |
| ENSMUSG00000028453 | 11125 Fancg         |
| ENSMUSG00000101922 | 11126 Gm29345       |
| ENSMUSG00000000276 | 11127 Dgke          |
| ENSMUSG00000086801 | 11128 Gm15943       |

|                     |                     |
|---------------------|---------------------|
| ENSMUSG00000007035  | 11129 Msh5          |
| ENSMUSG000000073154 | 11130 9330158H04Rik |
| ENSMUSG000000042303 | 11131 Sgsm3         |
| ENSMUSG000000105867 | 11132 Gm42517       |
| ENSMUSG000000083064 | 11133 Gm7785        |
| ENSMUSG000000005505 | 11134 Kbtbd4        |
| ENSMUSG000000078435 | 11135 AU041133      |
| ENSMUSG000000054499 | 11136 Dedd2         |
| ENSMUSG000000070287 | 11137 Slc35g2       |
| ENSMUSG000000038555 | 11138 Reep2         |
| ENSMUSG000000047117 | 11139 Ankdd1b       |
| ENSMUSG000000048644 | 11140 Ctxn1         |
| ENSMUSG000000090673 | 11141 Gm340         |
| ENSMUSG000000096330 | 11142 Gm21976       |
| ENSMUSG000000084183 | 11143 Gm12009       |
| ENSMUSG000000035104 | 11144 Eva1a         |
| ENSMUSG000000042293 | 11145 Gm5617        |
| ENSMUSG000000091655 | 11146 Gm8741        |
| ENSMUSG000000083892 | 11147 Gm1848        |
| ENSMUSG000000097324 | 11148 Mir143hg      |
| ENSMUSG000000032551 | 11149 1110059G10Rik |
| ENSMUSG000000022358 | 11150 Fbxo32        |
| ENSMUSG000000066362 | 11151 Rps13-ps1     |
| ENSMUSG000000105105 | 11152 Gm31363       |
| ENSMUSG000000019856 | 11153 Fam184a       |
| ENSMUSG000000055717 | 11154 Slain1        |
| ENSMUSG000000042256 | 11155 Ptchd4        |
| ENSMUSG000000089989 | 11156 Flt3l         |
| ENSMUSG000000062382 | 11157 Gm10116       |
| ENSMUSG000000067424 | 11158 Zfp563        |
| ENSMUSG000000100603 | 11159 1700129L04Rik |
| ENSMUSG000000105276 | 11160 Gm42691       |
| ENSMUSG000000097062 | 11161 Gm17586       |
| ENSMUSG000000016758 | 11162 Bik           |
| ENSMUSG000000086405 | 11163 9330198N18Rik |
| ENSMUSG000000038351 | 11164 Sgsm2         |
| ENSMUSG000000059713 | 11165 Rcan3         |
| ENSMUSG000000039676 | 11166 Capsl         |
| ENSMUSG000000028581 | 11167 Laptm5        |
| ENSMUSG000000049350 | 11168 Zg16          |
| ENSMUSG000000062729 | 11169 Ppox          |
| ENSMUSG00000007038  | 11170 Neu1          |

|                     |                     |
|---------------------|---------------------|
| ENSMUSG00000027371  | 11171 Fahd2a        |
| ENSMUSG00000108546  | 11172 RP24-63G4.13  |
| ENSMUSG00000044847  | 11173 Lsm11         |
| ENSMUSG000000087125 | 11174 A230108P19Rik |
| ENSMUSG00000032839  | 11175 Trpc1         |
| ENSMUSG000000087500 | 11176 Gm12426       |
| ENSMUSG000000049233 | 11177 Apoo-ps       |
| ENSMUSG00000044254  | 11178 Pcsk9         |
| ENSMUSG000000091471 | 11179 Gm20538       |
| ENSMUSG000000059708 | 11180 Akap17b       |
| ENSMUSG000000097792 | 11181 Gm27042       |
| ENSMUSG000000097661 | 11182 Gm26763       |
| ENSMUSG000000078584 | 11183 AU022252      |
| ENSMUSG000000027593 | 11184 Raly          |
| ENSMUSG000000023828 | 11185 Slc22a3       |
| ENSMUSG000000034639 | 11186 Setmar        |
| ENSMUSG000000038812 | 11187 Trmt112       |
| ENSMUSG000000062168 | 11188 Ppef1         |
| ENSMUSG000000044501 | 11189 Zfp758        |
| ENSMUSG000000037239 | 11190 Spred3        |
| ENSMUSG000000057054 | 11191 Inca1         |
| ENSMUSG000000039158 | 11192 Akna          |
| ENSMUSG000000024696 | 11193 Lpxn          |
| ENSMUSG000000026589 | 11194 Sec16b        |
| ENSMUSG000000032680 | 11195 6820408C15Rik |
| ENSMUSG000000083443 | 11196 Gm15519       |
| ENSMUSG000000097518 | 11197 Gm26694       |
| ENSMUSG000000032673 | 11198 Prorsd1       |
| ENSMUSG000000097727 | 11199 F630040K05Rik |
| ENSMUSG000000082103 | 11200 Gm15320       |
| ENSMUSG000000043487 | 11201 Acot6         |
| ENSMUSG000000060613 | 11202 Cyp2c70       |
| ENSMUSG00000107881  | 11203 RP23-380L19.3 |
| ENSMUSG000000021087 | 11204 Rtn1          |
| ENSMUSG000000039670 | 11205 Oxld1         |
| ENSMUSG000000099689 | 11206 Zfp383        |
| ENSMUSG000000079604 | 11207 Gm13219       |
| ENSMUSG000000040260 | 11208 Daam2         |
| ENSMUSG000000085912 | 11209 Trp53cor1     |
| ENSMUSG000000046818 | 11210 Ddit4l        |
| ENSMUSG000000081160 | 11211 Gm14897       |
| ENSMUSG000000056836 | 11212 Gm6851        |

|                     |                     |
|---------------------|---------------------|
| ENSMUSG00000028524  | 11213 Sgip1         |
| ENSMUSG00000080778  | 11214 Gm7199        |
| ENSMUSG00000021792  | 11215 Fam213a       |
| ENSMUSG00000028914  | 11216 Casp9         |
| ENSMUSG00000098129  | 11217 Gm27040       |
| ENSMUSG00000038181  | 11218 Chpf2         |
| ENSMUSG00000034255  | 11219 Arhgap27      |
| ENSMUSG00000024742  | 11220 Fen1          |
| ENSMUSG00000092223  | 11221 Gm19807       |
| ENSMUSG00000047003  | 11222 Zfp41         |
| ENSMUSG00000050545  | 11223 Fam228b       |
| ENSMUSG00000026734  | 11224 4921504E06Rik |
| ENSMUSG00000097922  | 11225 4930448N21Rik |
| ENSMUSG00000040033  | 11226 Stat2         |
| ENSMUSG00000020653  | 11227 Klf11         |
| ENSMUSG00000025885  | 11228 Myo5b         |
| ENSMUSG00000078861  | 11229 Zfp931        |
| ENSMUSG00000082028  | 11230 Gm1826        |
| ENSMUSG000000104699 | 11231 Rps4x-ps      |
| ENSMUSG00000039634  | 11232 Zfp189        |
| ENSMUSG00000035086  | 11233 Becn1         |
| ENSMUSG00000090213  | 11234 Tmem189       |
| ENSMUSG00000030413  | 11235 Pglyrp1       |
| ENSMUSG00000086498  | 11236 Gm12681       |
| ENSMUSG00000032425  | 11237 Zfp949        |
| ENSMUSG000000102074 | 11238 Gm29020       |
| ENSMUSG000000107863 | 11239 RP23-177G20.1 |
| ENSMUSG00000007646  | 11240 Rad51c        |
| ENSMUSG00000004655  | 11241 Aqp1          |
| ENSMUSG00000038210  | 11242 Hoxa11        |
| ENSMUSG00000043501  | 11243 Lgals2        |
| ENSMUSG00000028078  | 11244 Dclk2         |
| ENSMUSG00000037818  | 11245 3110057O12Rik |
| ENSMUSG00000073860  | 11246 Gm829         |
| ENSMUSG00000022938  | 11247 Fam3b         |
| ENSMUSG00000054893  | 11248 Zfp667        |
| ENSMUSG00000067229  | 11249 Cyp2c66       |
| ENSMUSG00000074766  | 11250 lsm1          |
| ENSMUSG00000036249  | 11251 Rbm43         |
| ENSMUSG00000083076  | 11252 Gm11408       |
| ENSMUSG00000034687  | 11253 Fras1         |
| ENSMUSG00000095432  | 11254 Zfp748        |

|                     |                     |
|---------------------|---------------------|
| ENSMUSG00000019732  | 11255 Calr3         |
| ENSMUSG00000027834  | 11256 Serpini1      |
| ENSMUSG000000102914 | 11257 Gm35106       |
| ENSMUSG000000049148 | 11258 Plcx3         |
| ENSMUSG000000083937 | 11259 Cct3-ps1      |
| ENSMUSG000000059142 | 11260 Zfp945        |
| ENSMUSG000000041817 | 11261 Fam169a       |
| ENSMUSG000000026535 | 11262 Ifi202b       |
| ENSMUSG000000033114 | 11263 Slc35d2       |
| ENSMUSG000000097148 | 11264 Gm3839        |
| ENSMUSG000000062526 | 11265 Mppe1         |
| ENSMUSG000000030584 | 11266 Dpf1          |
| ENSMUSG000000039200 | 11267 Atf7ip2       |
| ENSMUSG000000027078 | 11268 Ube2l6        |
| ENSMUSG000000020811 | 11269 Wscd1         |
| ENSMUSG000000008489 | 11270 Elavl2        |
| ENSMUSG000000050855 | 11271 Zfp940        |
| ENSMUSG000000007653 | 11272 Gabrb2        |
| ENSMUSG000000026875 | 11273 Traf1         |
| ENSMUSG000000033350 | 11274 Chst2         |
| ENSMUSG000000073471 | 11275 Rsph3a        |
| ENSMUSG000000097632 | 11276 4930552P12Rik |
| ENSMUSG000000070498 | 11277 Tmem132b      |
| ENSMUSG000000032842 | 11278 Abcc10        |
| ENSMUSG000000048764 | 11279 Tmprss11f     |
| ENSMUSG000000021572 | 11280 Cep72         |
| ENSMUSG000000021768 | 11281 Dusp13        |
| ENSMUSG000000102813 | 11282 Gm37795       |
| ENSMUSG000000022441 | 11283 Efcab6        |
| ENSMUSG000000085852 | 11284 Gm13807       |
| ENSMUSG000000020286 | 11285 1700093K21Rik |
| ENSMUSG000000083468 | 11286 Gm9431        |
| ENSMUSG000000059013 | 11287 Sh2d3c        |
| ENSMUSG000000085368 | 11288 Gm16188       |
| ENSMUSG000000030838 | 11289 Ush1c         |
| ENSMUSG000000064307 | 11290 Lrrc51        |
| ENSMUSG000000029718 | 11291 Pcolce        |
| ENSMUSG000000104802 | 11292 Gm5869        |
| ENSMUSG000000027525 | 11293 Phactr3       |
| ENSMUSG000000096917 | 11294 2500002B13Rik |
| ENSMUSG000000067121 | 11295 Gm7027        |
| ENSMUSG000000020467 | 11296 Efemp1        |

|                     |                     |
|---------------------|---------------------|
| ENSMUSG00000046056  | 11297 Sbsn          |
| ENSMUSG00000049420  | 11298 Tmem200a      |
| ENSMUSG00000049477  | 11299 Gm8508        |
| ENSMUSG000000105219 | 11300 Gm43821       |
| ENSMUSG00000022235  | 11301 Cmb1          |
| ENSMUSG00000040616  | 11302 Tmem51        |
| ENSMUSG00000047638  | 11303 Nr1h4         |
| ENSMUSG00000071340  | 11304 Trappc3l      |
| ENSMUSG00000019872  | 11305 Smpdl3a       |
| ENSMUSG00000041396  | 11306 Mettl18       |
| ENSMUSG00000074782  | 11307 4833422C13Rik |
| ENSMUSG00000057265  | 11308 Ccdc176       |
| ENSMUSG00000037996  | 11309 Slc24a2       |
| ENSMUSG00000022203  | 11310 Efs           |
| ENSMUSG000000108811 | 11311 RP23-2D23.2   |
| ENSMUSG00000019256  | 11312 Ahr           |
| ENSMUSG00000085454  | 11313 Grip1os3      |
| ENSMUSG00000074227  | 11314 Spint2        |
| ENSMUSG00000022484  | 11315 Hoxc10        |
| ENSMUSG00000018599  | 11316 Mief2         |
| ENSMUSG00000037661  | 11317 Gpr160        |
| ENSMUSG00000029168  | 11318 Dpysl5        |
| ENSMUSG00000007379  | 11319 Dennd2c       |
| ENSMUSG00000098318  | 11320 1190002F15Rik |
| ENSMUSG00000086074  | 11321 Gm13274       |
| ENSMUSG00000037363  | 11322 Letm2         |
| ENSMUSG00000014837  | 11323 4931428F04Rik |
| ENSMUSG00000083362  | 11324 Gm8606        |
| ENSMUSG00000025464  | 11325 Paox          |
| ENSMUSG00000089670  | 11326 Gm16581       |
| ENSMUSG00000026051  | 11327 1500015O10Rik |
| ENSMUSG00000043155  | 11328 Hpd1          |
| ENSMUSG00000043015  | 11329 Tmem194b      |
| ENSMUSG00000026023  | 11330 Cdk15         |
| ENSMUSG00000036555  | 11331 Iqce          |
| ENSMUSG000000107272 | 11332 Gm42730       |
| ENSMUSG00000036902  | 11333 Neto2         |
| ENSMUSG00000022439  | 11334 Parvg         |
| ENSMUSG00000021772  | 11335 Nkiras1       |
| ENSMUSG00000036504  | 11336 Phpt1         |
| ENSMUSG00000042404  | 11337 Dennd4b       |
| ENSMUSG00000001948  | 11338 Spa17         |

|                    |                    |
|--------------------|--------------------|
| ENSMUSG00000108393 | 11339 RP23-402A4.1 |
| ENSMUSG00000037890 | 11340 Wdr19        |
| ENSMUSG00000031312 | 11341 Itgb1bp2     |
| ENSMUSG00000053137 | 11342 Mapk11       |
| ENSMUSG00000060063 | 11343 Alox5ap      |
| ENSMUSG00000082192 | 11344 Gm14719      |
| ENSMUSG00000028434 | 11345 Epb41l4b     |
| ENSMUSG00000027603 | 11346 Ggt7         |
| ENSMUSG00000025227 | 11347 Tmem180      |
| ENSMUSG00000049532 | 11348 Sall2        |
| ENSMUSG00000096687 | 11349 AA474331     |
| ENSMUSG00000006720 | 11350 Zfp184       |
| ENSMUSG00000062074 | 11351 Wisp3        |
| ENSMUSG00000018750 | 11352 Zbtb4        |
| ENSMUSG00000063590 | 11353 Slc22a28     |
| ENSMUSG00000083708 | 11354 Gm13123      |
| ENSMUSG00000054206 | 11355 Gzmm         |
| ENSMUSG00000092356 | 11356 Gm20532      |
| ENSMUSG00000105552 | 11357 Gm19710      |
| ENSMUSG00000103911 | 11358 Gm38074      |
| ENSMUSG00000073377 | 11359 AU016765     |
| ENSMUSG00000025964 | 11360 Adam23       |
| ENSMUSG00000082876 | 11361 Gm11889      |
| ENSMUSG00000024798 | 11362 Htr7         |
| ENSMUSG00000027508 | 11363 Pag1         |
| ENSMUSG00000021835 | 11364 Bmp4         |
| ENSMUSG00000044165 | 11365 Bcl2l15      |
| ENSMUSG00000027546 | 11366 Atp9a        |
| ENSMUSG00000042451 | 11367 Mybph        |
| ENSMUSG00000082519 | 11368 Vamp7-ps     |
| ENSMUSG00000026443 | 11369 Lrrn2        |
| ENSMUSG00000003762 | 11370 Adck4        |
| ENSMUSG00000063975 | 11371 Slco1a5      |
| ENSMUSG00000081957 | 11372 Ak3l2-ps     |
| ENSMUSG00000051900 | 11373 Abca16       |
| ENSMUSG00000038208 | 11374 Pgap3        |
| ENSMUSG00000026873 | 11375 Phf19        |
| ENSMUSG00000105078 | 11376 Gm35911      |
| ENSMUSG00000082252 | 11377 Gm11204      |
| ENSMUSG00000043311 | 11378 D17H6S53E    |
| ENSMUSG00000027233 | 11379 Patl2        |
| ENSMUSG00000078908 | 11380 Mon1b        |

|                    |                     |
|--------------------|---------------------|
| ENSMUSG00000002797 | 11381 Ggct          |
| ENSMUSG00000023909 | 11382 Paqr4         |
| ENSMUSG00000104045 | 11383 Gm37565       |
| ENSMUSG00000020642 | 11384 Rnf144a       |
| ENSMUSG00000002227 | 11385 Mov10         |
| ENSMUSG00000051238 | 11386 Swsap1        |
| ENSMUSG00000038451 | 11387 Spsb2         |
| ENSMUSG00000003038 | 11388 Hmgn2         |
| ENSMUSG00000020829 | 11389 Slc46a1       |
| ENSMUSG00000036894 | 11390 Rap2b         |
| ENSMUSG00000021265 | 11391 Slc25a29      |
| ENSMUSG00000061911 | 11392 Myt1l         |
| ENSMUSG00000025931 | 11393 Paqr8         |
| ENSMUSG00000032377 | 11394 Plscr4        |
| ENSMUSG00000045757 | 11395 Zfp764        |
| ENSMUSG00000024761 | 11396 Gm16437       |
| ENSMUSG00000075702 | 11397 Selm          |
| ENSMUSG00000055866 | 11398 Per2          |
| ENSMUSG00000020275 | 11399 Rel           |
| ENSMUSG00000031994 | 11400 Adamts8       |
| ENSMUSG00000038235 | 11401 F11r          |
| ENSMUSG00000036251 | 11402 Trpm8         |
| ENSMUSG00000027220 | 11403 Syt13         |
| ENSMUSG00000028587 | 11404 Orc1          |
| ENSMUSG00000020553 | 11405 Pctp          |
| ENSMUSG00000006403 | 11406 Adamts4       |
| ENSMUSG00000043290 | 11407 Zfp784        |
| ENSMUSG00000040563 | 11408 Lppr2         |
| ENSMUSG00000027661 | 11409 Slc2a10       |
| ENSMUSG00000028197 | 11410 Col24a1       |
| ENSMUSG00000026609 | 11411 Ush2a         |
| ENSMUSG00000090000 | 11412 Ier3ip1       |
| ENSMUSG00000048707 | 11413 Tprn          |
| ENSMUSG00000050628 | 11414 Ubald2        |
| ENSMUSG00000106917 | 11415 Gm7832        |
| ENSMUSG00000032733 | 11416 Snx33         |
| ENSMUSG00000096449 | 11417 Gm4076        |
| ENSMUSG00000022146 | 11418 Osmr          |
| ENSMUSG00000044730 | 11419 9930104L06Rik |
| ENSMUSG00000063694 | 11420 Cycs          |
| ENSMUSG00000042244 | 11421 Pglyrp3       |
| ENSMUSG00000025192 | 11422 Entpd7        |



|                    |                     |
|--------------------|---------------------|
| ENSMUSG00000046572 | 11423 Zfp518b       |
| ENSMUSG00000098447 | 11424 Gm27184       |
| ENSMUSG00000062083 | 11425 Rpl13a-ps1    |
| ENSMUSG00000061544 | 11426 Zfp229        |
| ENSMUSG00000022805 | 11427 Maats1        |
| ENSMUSG00000049230 | 11428 Gm9833        |
| ENSMUSG00000083283 | 11429 Gm15361       |
| ENSMUSG00000051920 | 11430 Rspo2         |
| ENSMUSG00000078489 | 11431 Gm17106       |
| ENSMUSG00000022032 | 11432 Scara5        |
| ENSMUSG00000107639 | 11433 RP23-338O19.2 |
| ENSMUSG00000028339 | 11434 Col15a1       |
| ENSMUSG00000087377 | 11435 AV099323      |
| ENSMUSG00000036995 | 11436 Asap3         |
| ENSMUSG00000028159 | 11437 Dapp1         |
| ENSMUSG00000057262 | 11438 Gm10020       |
| ENSMUSG00000026200 | 11439 Glb1l         |
| ENSMUSG00000073198 | 11440 Bnip3l-ps     |
| ENSMUSG00000036599 | 11441 Chst12        |
| ENSMUSG00000045466 | 11442 Zfp956        |
| ENSMUSG00000078126 | 11443 Rpl23a-ps3    |
| ENSMUSG00000017493 | 11444 Igfbp4        |
| ENSMUSG00000099385 | 11445 Gm9540        |
| ENSMUSG00000086224 | 11446 2700069I18Rik |
| ENSMUSG00000021259 | 11447 Cyp46a1       |
| ENSMUSG00000021999 | 11448 Cpb2          |
| ENSMUSG00000027368 | 11449 Dusp2         |
| ENSMUSG00000055972 | 11450 2810407A14Rik |
| ENSMUSG00000040213 | 11451 Ccbl2         |
| ENSMUSG00000098900 | 11452 Gm18190       |
| ENSMUSG00000090861 | 11453 Arf4os        |
| ENSMUSG00000040751 | 11454 Lat2          |
| ENSMUSG00000020545 | 11455 Lrrc72        |
| ENSMUSG00000066191 | 11456 Anks6         |
| ENSMUSG00000054263 | 11457 Lifr          |
| ENSMUSG00000034683 | 11458 Ppp1r1c       |
| ENSMUSG00000055254 | 11459 Ntrk2         |
| ENSMUSG00000059900 | 11460 Tmem40        |
| ENSMUSG00000095123 | 11461 Gm21781       |
| ENSMUSG00000103965 | 11462 Gm30173       |
| ENSMUSG00000097058 | 11463 4930556M19Rik |
| ENSMUSG00000030617 | 11464 Ccdc83        |

|                    |                     |
|--------------------|---------------------|
| ENSMUSG00000082895 | 11465 Rpsa-ps9      |
| ENSMUSG00000059659 | 11466 Gm10069       |
| ENSMUSG00000022993 | 11467 4930415O20Rik |
| ENSMUSG00000065541 | 11468 Mir24-2       |
| ENSMUSG00000029847 | 11469 2010107G12Rik |
| ENSMUSG00000037010 | 11470 Apln          |
| ENSMUSG00000022969 | 11471 Il10rb        |
| ENSMUSG00000028444 | 11472 Cntfr         |
| ENSMUSG00000097494 | 11473 4933406C10Rik |
| ENSMUSG00000038855 | 11474 Itpkb         |
| ENSMUSG00000031790 | 11475 Mmp15         |
| ENSMUSG00000023931 | 11476 Efhb          |
| ENSMUSG00000099764 | 11477 Rps10-ps2     |
| ENSMUSG00000015702 | 11478 Anxa9         |
| ENSMUSG00000047037 | 11479 Nipa1         |
| ENSMUSG00000031378 | 11480 Abcd1         |
| ENSMUSG00000055022 | 11481 Cntn1         |
| ENSMUSG00000023391 | 11482 Dlx2          |
| ENSMUSG00000042708 | 11483 Shcbp1l       |
| ENSMUSG00000068966 | 11484 Zbtb34        |
| ENSMUSG00000058022 | 11485 Adtrp         |
| ENSMUSG00000033540 | 11486 Idua          |
| ENSMUSG00000086837 | 11487 Gm16618       |
| ENSMUSG00000055963 | 11488 Triqk         |
| ENSMUSG00000027544 | 11489 Nfatc2        |
| ENSMUSG00000097412 | 11490 1810014B01Rik |
| ENSMUSG00000052504 | 11491 Epha3         |
| ENSMUSG00000070643 | 11492 Sox13         |
| ENSMUSG00000037321 | 11493 Tap1          |
| ENSMUSG00000039629 | 11494 Strip2        |
| ENSMUSG00000028972 | 11495 Car6          |
| ENSMUSG00000078604 | 11496 Gm10961       |
| ENSMUSG00000006649 | 11497 Nphs1         |
| ENSMUSG00000019823 | 11498 Mical1        |
| ENSMUSG00000083364 | 11499 Llph-ps2      |
| ENSMUSG00000038058 | 11500 Nod1          |
| ENSMUSG00000075256 | 11501 Cerkl         |
| ENSMUSG00000032899 | 11502 Styk1         |
| ENSMUSG00000051034 | 11503 Zfp11         |
| ENSMUSG00000054901 | 11504 Arhgef33      |
| ENSMUSG00000098286 | 11505 Mir8091       |
| ENSMUSG00000038618 | 11506 Rassf7        |

|                    |                     |
|--------------------|---------------------|
| ENSMUSG00000028871 | 11507 Rspo1         |
| ENSMUSG00000087412 | 11508 Gm15501       |
| ENSMUSG00000053390 | 11509 Zfp952        |
| ENSMUSG00000097457 | 11510 2310031A07Rik |
| ENSMUSG00000050332 | 11511 Amer1         |
| ENSMUSG00000036834 | 11512 Plch1         |
| ENSMUSG00000022382 | 11513 Wnt7b         |
| ENSMUSG00000095564 | 11514 Gm20474       |
| ENSMUSG00000048652 | 11515 Samd13        |
| ENSMUSG00000030337 | 11516 Vamp1         |
| ENSMUSG00000053178 | 11517 Mterf1b       |
| ENSMUSG00000029189 | 11518 Sel1l3        |
| ENSMUSG00000029864 | 11519 Gstk1         |
| ENSMUSG00000045464 | 11520 2810002D19Rik |
| ENSMUSG00000002944 | 11521 Cd36          |
| ENSMUSG00000015980 | 11522 Lrrc27        |
| ENSMUSG00000042851 | 11523 Zc3h6         |
| ENSMUSG00000048988 | 11524 Eln1          |
| ENSMUSG00000028244 | 11525 1700025O08Rik |
| ENSMUSG00000097565 | 11526 Gm26965       |
| ENSMUSG00000034555 | 11527 Tex16         |
| ENSMUSG00000037973 | 11528 Ccdc129       |
| ENSMUSG00000052616 | 11529 Ccdc79        |
| ENSMUSG00000085189 | 11530 Gm11963       |
| ENSMUSG00000081738 | 11531 Hmgb1-ps2     |
| ENSMUSG00000024869 | 11532 Nudt8         |
| ENSMUSG00000039977 | 11533 Ccdc67        |
| ENSMUSG00000034990 | 11534 Otoa          |
| ENSMUSG00000044957 | 11535 Pp2d1         |
| ENSMUSG00000036411 | 11536 9530077C05Rik |
| ENSMUSG00000030657 | 11537 Xylt1         |
| ENSMUSG00000037190 | 11538 Cyb561d2      |
| ENSMUSG00000034235 | 11539 Usp54         |
| ENSMUSG00000035757 | 11540 Selo          |
| ENSMUSG00000081056 | 11541 Gm13998       |
| ENSMUSG00000081227 | 11542 Gm13082       |
| ENSMUSG00000036815 | 11543 Dpp10         |
| ENSMUSG00000072834 | 11544 Gm12298       |
| ENSMUSG00000034800 | 11545 Zfp661        |
| ENSMUSG00000013584 | 11546 Aldh1a2       |
| ENSMUSG00000033722 | 11547 BC034090      |
| ENSMUSG00000105673 | 11548 Gm43757       |

|                    |                     |
|--------------------|---------------------|
| ENSMUSG00000036537 | 11549 Rnf113a1      |
| ENSMUSG00000019906 | 11550 Lin7a         |
| ENSMUSG00000030322 | 11551 Mbd4          |
| ENSMUSG00000097488 | 11552 4732487G21Rik |
| ENSMUSG00000028744 | 11553 Pqlc2         |
| ENSMUSG00000026458 | 11554 Ppfia4        |
| ENSMUSG00000068396 | 11555 Rpl34-ps1     |
| ENSMUSG00000106496 | 11556 Gm7733        |
| ENSMUSG00000027243 | 11557 Harbi1        |
| ENSMUSG00000027520 | 11558 Zdbf2         |
| ENSMUSG00000028958 | 11559 Tmub1         |
| ENSMUSG00000105651 | 11560 Gm43003       |
| ENSMUSG00000024663 | 11561 Rab3il1       |
| ENSMUSG00000058246 | 11562 Gm10037       |
| ENSMUSG00000042942 | 11563 Greb1l        |
| ENSMUSG00000031155 | 11564 Pim2          |
| ENSMUSG00000050947 | 11565 Amigo1        |
| ENSMUSG00000083994 | 11566 Gm16465       |
| ENSMUSG00000020690 | 11567 Efcab3        |
| ENSMUSG00000041762 | 11568 Gpr155        |
| ENSMUSG00000032011 | 11569 Thy1          |
| ENSMUSG00000039865 | 11570 Slc44a3       |
| ENSMUSG00000026433 | 11571 Rab29         |
| ENSMUSG00000074482 | 11572 Gm16589       |
| ENSMUSG00000041809 | 11573 Efhc1         |
| ENSMUSG00000042579 | 11574 4632404H12Rik |
| ENSMUSG00000000263 | 11575 Glra1         |
| ENSMUSG00000025466 | 11576 Fuom          |
| ENSMUSG00000090877 | 11577 Hspa1b        |
| ENSMUSG00000020000 | 11578 Moxd1         |
| ENSMUSG00000054519 | 11579 Zfp867        |
| ENSMUSG00000074500 | 11580 Zfp558        |
| ENSMUSG00000029600 | 11581 Rita1         |
| ENSMUSG00000000197 | 11582 Nalcn         |
| ENSMUSG00000072774 | 11583 Zfp951        |
| ENSMUSG00000022040 | 11584 Ephx2         |
| ENSMUSG00000031512 | 11585 Tex29         |
| ENSMUSG00000090667 | 11586 Gm765         |
| ENSMUSG00000036661 | 11587 Dennd3        |
| ENSMUSG00000057667 | 11588 Bloc1s3       |
| ENSMUSG00000069125 | 11589 Rps24-ps2     |
| ENSMUSG00000028688 | 11590 Toe1          |

|                    |                     |
|--------------------|---------------------|
| ENSMUSG00000021871 | 11591 Pnp           |
| ENSMUSG00000064141 | 11592 Zfp69         |
| ENSMUSG00000009772 | 11593 Nuak2         |
| ENSMUSG00000038651 | 11594 Sycp2l        |
| ENSMUSG00000033033 | 11595 Calhm2        |
| ENSMUSG00000042121 | 11596 Ssh1          |
| ENSMUSG00000091443 | 11597 Gm17023       |
| ENSMUSG00000026659 | 11598 Dusp12        |
| ENSMUSG00000095588 | 11599 Gm12350       |
| ENSMUSG00000042385 | 11600 Gzmk          |
| ENSMUSG00000081952 | 11601 Gm12178       |
| ENSMUSG00000072553 | 11602 Gm525         |
| ENSMUSG00000028040 | 11603 Efna4         |
| ENSMUSG00000023927 | 11604 Satb1         |
| ENSMUSG00000074785 | 11605 Plxnc1        |
| ENSMUSG00000067629 | 11606 Syngap1       |
| ENSMUSG00000007122 | 11607 Casq1         |
| ENSMUSG00000039787 | 11608 Cercam        |
| ENSMUSG00000027188 | 11609 Pamr1         |
| ENSMUSG00000040272 | 11610 Accs          |
| ENSMUSG00000084013 | 11611 Gm14270       |
| ENSMUSG00000020474 | 11612 Polm          |
| ENSMUSG00000066233 | 11613 Tmem42        |
| ENSMUSG00000020599 | 11614 Rgs9          |
| ENSMUSG00000043602 | 11615 Zfp3          |
| ENSMUSG00000102548 | 11616 Gm16701       |
| ENSMUSG00000050288 | 11617 Fzd2          |
| ENSMUSG00000053897 | 11618 Slc39a8       |
| ENSMUSG00000023707 | 11619 Ogfod2        |
| ENSMUSG00000019893 | 11620 Ros1          |
| ENSMUSG00000066150 | 11621 Slc31a1       |
| ENSMUSG00000047242 | 11622 Taf9b         |
| ENSMUSG00000004540 | 11623 Psg17         |
| ENSMUSG00000025658 | 11624 Cnksr2        |
| ENSMUSG00000026336 | 11625 Slco6d1       |
| ENSMUSG00000107145 | 11626 Gm43442       |
| ENSMUSG00000022421 | 11627 Nptxr         |
| ENSMUSG00000078800 | 11628 Bsph2         |
| ENSMUSG00000080776 | 11629 Gm12174       |
| ENSMUSG00000085741 | 11630 5430405H02Rik |
| ENSMUSG00000020420 | 11631 Zfp607        |
| ENSMUSG00000038195 | 11632 Rilp          |

|                    |                     |
|--------------------|---------------------|
| ENSMUSG00000029007 | 11633 Agtrap        |
| ENSMUSG00000026399 | 11634 Cd55          |
| ENSMUSG00000017747 | 11635 Ghdc          |
| ENSMUSG00000038838 | 11636 Vars2         |
| ENSMUSG00000046380 | 11637 Jrk           |
| ENSMUSG00000097041 | 11638 Pafah1b1-ps1  |
| ENSMUSG00000032565 | 11639 Nudt16        |
| ENSMUSG00000063698 | 11640 Sfxn4         |
| ENSMUSG00000017667 | 11641 Zfp334        |
| ENSMUSG00000052075 | 11642 1700029F12Rik |
| ENSMUSG00000027261 | 11643 Hao1          |
| ENSMUSG00000066952 | 11644 Myo1h         |
| ENSMUSG00000086401 | 11645 Gm15559       |
| ENSMUSG00000085894 | 11646 Gm15832       |
| ENSMUSG00000018411 | 11647 Mapt          |
| ENSMUSG00000083681 | 11648 Gm6640        |
| ENSMUSG00000090015 | 11649 Gm15446       |
| ENSMUSG00000028132 | 11650 Tmem56        |
| ENSMUSG00000090336 | 11651 4932443I19Rik |
| ENSMUSG00000091794 | 11652 Vmn2r18       |
| ENSMUSG00000043024 | 11653 Gm16433       |
| ENSMUSG00000082381 | 11654 Gm12928       |
| ENSMUSG00000036552 | 11655 Ermard        |
| ENSMUSG00000085576 | 11656 Dpy19l2       |
| ENSMUSG00000074673 | 11657 Ttl19         |
| ENSMUSG00000021120 | 11658 Pigh          |
| ENSMUSG00000093380 | 11659 Gm20685       |
| ENSMUSG00000037827 | 11660 Gm5884        |
| ENSMUSG00000105161 | 11661 Gm42595       |
| ENSMUSG00000036975 | 11662 Tmem177       |
| ENSMUSG00000087461 | 11663 C230014O12Rik |
| ENSMUSG00000078716 | 11664 Tmem8b        |
| ENSMUSG00000046541 | 11665 Zfp526        |
| ENSMUSG00000069378 | 11666 Prdm6         |
| ENSMUSG00000074283 | 11667 Zfp109        |
| ENSMUSG00000038754 | 11668 Elovl3        |
| ENSMUSG00000033152 | 11669 Podxl2        |
| ENSMUSG00000081071 | 11670 Gm9836        |
| ENSMUSG00000036545 | 11671 Adamts2       |
| ENSMUSG00000036306 | 11672 Lzts1         |
| ENSMUSG00000051147 | 11673 Nat2          |
| ENSMUSG00000106990 | 11674 Gm42547       |

|                     |                     |
|---------------------|---------------------|
| ENSMUSG00000070802  | 11675 Pnmal2        |
| ENSMUSG00000085175  | 11676 Gm11423       |
| ENSMUSG00000087373  | 11677 Gm15892       |
| ENSMUSG00000026489  | 11678 Adck3         |
| ENSMUSG00000082674  | 11679 Gm11914       |
| ENSMUSG00000004902  | 11680 Slc25a18      |
| ENSMUSG00000025938  | 11681 Slco5a1       |
| ENSMUSG00000058443  | 11682 Rpl10-ps3     |
| ENSMUSG00000042249  | 11683 Adrbk2        |
| ENSMUSG00000025887  | 11684 Casp12        |
| ENSMUSG00000051502  | 11685 Ufsp1         |
| ENSMUSG00000072762  | 11686 4930522L14Rik |
| ENSMUSG00000000823  | 11687 Znf512b       |
| ENSMUSG00000034258  | 11688 Mfsd7c        |
| ENSMUSG00000010342  | 11689 Tex14         |
| ENSMUSG00000085359  | 11690 Gm12336       |
| ENSMUSG00000032549  | 11691 Rab6b         |
| ENSMUSG00000030443  | 11692 Zfp583        |
| ENSMUSG00000026096  | 11693 Osgepl1       |
| ENSMUSG00000031767  | 11694 Nudt7         |
| ENSMUSG00000074218  | 11695 Cox7a1        |
| ENSMUSG00000049122  | 11696 Frmd3         |
| ENSMUSG00000034616  | 11697 Ssh3          |
| ENSMUSG00000019810  | 11698 Fuca2         |
| ENSMUSG00000042246  | 11699 Tmc7          |
| ENSMUSG00000074513  | 11700 Arfip1        |
| ENSMUSG00000046947  | 11701 Adck2         |
| ENSMUSG00000037349  | 11702 Nudt22        |
| ENSMUSG00000060029  | 11703 4930473A02Rik |
| ENSMUSG00000069206  | 11704 Zfp874a       |
| ENSMUSG00000044966  | 11705 Fbxo48        |
| ENSMUSG000000101834 | 11706 Gm5829        |
| ENSMUSG00000087675  | 11707 Gm11762       |
| ENSMUSG00000004815  | 11708 Dgkq          |
| ENSMUSG00000024176  | 11709 Sox8          |
| ENSMUSG00000055114  | 11710 Anxa13        |
| ENSMUSG00000068130  | 11711 Zfp442        |
| ENSMUSG00000053646  | 11712 Plxnb1        |
| ENSMUSG00000047342  | 11713 Zfp286        |
| ENSMUSG00000086054  | 11714 Hnf1aos1      |
| ENSMUSG00000061894  | 11715 Zscan20       |
| ENSMUSG00000060989  | 11716 Gm11847       |

|                    |                     |
|--------------------|---------------------|
| ENSMUSG00000091460 | 11717 Gm7808        |
| ENSMUSG00000097760 | 11718 6030442K20Rik |
| ENSMUSG00000071083 | 11719 Gm10311       |
| ENSMUSG00000062760 | 11720 1810041L15Rik |
| ENSMUSG00000019761 | 11721 Krt10         |
| ENSMUSG00000031327 | 11722 Chic1         |
| ENSMUSG00000021510 | 11723 Zfp729a       |
| ENSMUSG00000079295 | 11724 Klrb1-ps1     |
| ENSMUSG00000083912 | 11725 Gm5391        |
| ENSMUSG00000061451 | 11726 Tmem151a      |
| ENSMUSG00000085634 | 11727 Gm15290       |
| ENSMUSG00000104141 | 11728 Gm6140        |
| ENSMUSG00000079055 | 11729 Slc8a3        |
| ENSMUSG00000092384 | 11730 Gm4189        |
| ENSMUSG00000100684 | 11731 Gm20268       |
| ENSMUSG00000020332 | 11732 Meikin        |
| ENSMUSG00000029403 | 11733 Cdkl2         |
| ENSMUSG00000051811 | 11734 Cox6b2        |
| ENSMUSG00000024899 | 11735 Papss2        |
| ENSMUSG00000097348 | 11736 Rmst          |
| ENSMUSG00000050822 | 11737 Slc29a4       |
| ENSMUSG00000037493 | 11738 Cib2          |
| ENSMUSG00000068457 | 11739 Uty           |
| ENSMUSG00000027643 | 11740 Ghrh          |
| ENSMUSG00000032122 | 11741 Slc37a2       |
| ENSMUSG00000031576 | 11742 Kcnu1         |
| ENSMUSG00000033538 | 11743 Casp4         |
| ENSMUSG00000028979 | 11744 Masp2         |
| ENSMUSG00000097571 | 11745 Jpx           |
| ENSMUSG00000054003 | 11746 Tdrd9         |
| ENSMUSG00000085642 | 11747 3110053B16Rik |
| ENSMUSG00000054871 | 11748 Tmem158       |
| ENSMUSG00000097284 | 11749 4930480K23Rik |
| ENSMUSG00000040536 | 11750 Necab1        |
| ENSMUSG00000024160 | 11751 Spsb3         |
| ENSMUSG00000026980 | 11752 Ly75          |
| ENSMUSG00000098684 | 11753 Gm27246       |
| ENSMUSG00000039795 | 11754 Zfand1        |
| ENSMUSG00000106666 | 11755 Gm43587       |
| ENSMUSG00000025813 | 11756 Homer2        |
| ENSMUSG00000002409 | 11757 Dyrk1b        |
| ENSMUSG00000081787 | 11758 Gm13991       |



|                    |                     |
|--------------------|---------------------|
| ENSMUSG00000098332 | 11759 2310009A05Rik |
| ENSMUSG00000029279 | 11760 Brdt          |
| ENSMUSG00000033124 | 11761 Atg9a         |
| ENSMUSG00000048728 | 11762 Zfp454        |
| ENSMUSG00000024502 | 11763 Jakmip2       |
| ENSMUSG00000081642 | 11764 Gm13532       |
| ENSMUSG00000035504 | 11765 Reep6         |
| ENSMUSG00000090790 | 11766 Gm17377       |
| ENSMUSG00000068487 | 11767 Gm4943        |
| ENSMUSG00000053957 | 11768 Gm12474       |
| ENSMUSG00000072568 | 11769 Fam84b        |
| ENSMUSG00000015750 | 11770 Aph1a         |
| ENSMUSG00000085271 | 11771 E130006D01Rik |
| ENSMUSG00000020732 | 11772 Rab37         |
| ENSMUSG00000019894 | 11773 Slc6a15       |
| ENSMUSG00000031445 | 11774 Proz          |
| ENSMUSG00000037316 | 11775 Bag4          |
| ENSMUSG00000023882 | 11776 Zfp54         |
| ENSMUSG00000020491 | 11777 2810021J22Rik |
| ENSMUSG00000049047 | 11778 Armcx3        |
| ENSMUSG00000044609 | 11779 Gm9294        |
| ENSMUSG00000097892 | 11780 Gm26801       |
| ENSMUSG00000072770 | 11781 Acrbp         |
| ENSMUSG00000021702 | 11782 Thbs4         |
| ENSMUSG00000086962 | 11783 Gm12248       |
| ENSMUSG00000023911 | 11784 Flywch2       |
| ENSMUSG00000086526 | 11785 Gm12762       |
| ENSMUSG00000048138 | 11786 Dmrt2         |
| ENSMUSG00000102135 | 11787 Gm37108       |
| ENSMUSG00000105787 | 11788 Gm8099        |
| ENSMUSG00000019846 | 11789 Lama4         |
| ENSMUSG00000087574 | 11790 C030037D09Rik |
| ENSMUSG00000005947 | 11791 Itgae         |
| ENSMUSG00000085517 | 11792 Gm12963       |
| ENSMUSG00000063714 | 11793 Sp3os         |
| ENSMUSG00000030087 | 11794 Klf15         |
| ENSMUSG00000081920 | 11795 Gm15359       |
| ENSMUSG00000040860 | 11796 Crocc         |
| ENSMUSG00000101464 | 11797 Gm7436        |
| ENSMUSG00000097534 | 11798 Gm16675       |
| ENSMUSG00000024378 | 11799 Stard4        |
| ENSMUSG00000020963 | 11800 Tshr          |

|                    |                     |
|--------------------|---------------------|
| ENSMUSG00000026235 | 11801 Epha4         |
| ENSMUSG00000027997 | 11802 Casp6         |
| ENSMUSG00000026592 | 11803 Tex35         |
| ENSMUSG00000085028 | 11804 Slc2a4rg-ps   |
| ENSMUSG00000074277 | 11805 Phldb3        |
| ENSMUSG00000106674 | 11806 Gm43153       |
| ENSMUSG00000031242 | 11807 2610002M06Rik |
| ENSMUSG00000053113 | 11808 Socs3         |
| ENSMUSG00000070343 | 11809 Gm10288       |
| ENSMUSG00000049929 | 11810 Lpar4         |
| ENSMUSG00000085768 | 11811 Gm13707       |
| ENSMUSG00000040828 | 11812 Catsperd      |
| ENSMUSG00000056025 | 11813 Clca3a1       |
| ENSMUSG00000055725 | 11814 Paqr3         |
| ENSMUSG00000086382 | 11815 Chrna1os      |
| ENSMUSG00000079598 | 11816 Clec2l        |
| ENSMUSG00000108293 | 11817 Pla2g4c-ps    |
| ENSMUSG00000085419 | 11818 Gm11734       |
| ENSMUSG00000097644 | 11819 Gm26862       |
| ENSMUSG00000026170 | 11820 Cyp27a1       |
| ENSMUSG00000005357 | 11821 Slc1a6        |
| ENSMUSG00000097413 | 11822 A830052D11Rik |
| ENSMUSG00000039616 | 11823 Moccos        |
| ENSMUSG00000041889 | 11824 Shisa4        |
| ENSMUSG00000105816 | 11825 D030025E07Rik |
| ENSMUSG00000074807 | 11826 Gm10762       |
| ENSMUSG00000039167 | 11827 Adgrl4        |
| ENSMUSG00000029401 | 11828 Rilpl2        |
| ENSMUSG00000097164 | 11829 Cep83os       |
| ENSMUSG00000094989 | 11830 Rpl9-ps4      |
| ENSMUSG00000038967 | 11831 Pdk2          |
| ENSMUSG00000057696 | 11832 Rpl30-ps1     |
| ENSMUSG00000013419 | 11833 Zfp651        |
| ENSMUSG00000089983 | 11834 2010320O07Rik |
| ENSMUSG00000042320 | 11835 Prox2         |
| ENSMUSG00000021287 | 11836 Xrcc3         |
| ENSMUSG00000041380 | 11837 Htr2c         |
| ENSMUSG00000094594 | 11838 Tpd52-ps      |
| ENSMUSG00000040570 | 11839 Rundc3b       |
| ENSMUSG00000097431 | 11840 Gm26782       |
| ENSMUSG00000024948 | 11841 Map4k2        |
| ENSMUSG00000020723 | 11842 Cacng4        |

|                    |                     |
|--------------------|---------------------|
| ENSMUSG00000074649 | 11843 BC029722      |
| ENSMUSG00000105103 | 11844 Gm43191       |
| ENSMUSG00000074183 | 11845 Gsta1         |
| ENSMUSG00000082475 | 11846 Gm7206        |
| ENSMUSG00000085550 | 11847 Gm15658       |
| ENSMUSG00000034429 | 11848 Zfp707        |
| ENSMUSG00000042500 | 11849 Ago4          |
| ENSMUSG00000045690 | 11850 Wdr89         |
| ENSMUSG00000097005 | 11851 4930598A11Rik |
| ENSMUSG00000016087 | 11852 Fli1          |
| ENSMUSG00000033533 | 11853 Acsm1         |
| ENSMUSG00000100832 | 11854 Gm29260       |
| ENSMUSG00000058093 | 11855 Zfp729b       |
| ENSMUSG00000009734 | 11856 Pou6f2        |
| ENSMUSG00000018543 | 11857 1700001P01Rik |
| ENSMUSG00000011052 | 11858 1700049J03Rik |
| ENSMUSG00000012126 | 11859 Ubxn11        |
| ENSMUSG00000027827 | 11860 Kcnab1        |
| ENSMUSG00000081544 | 11861 Gm13077       |
| ENSMUSG00000028391 | 11862 Wdr31         |
| ENSMUSG00000089646 | 11863 Gm15796       |
| ENSMUSG00000075044 | 11864 Slc22a29      |
| ENSMUSG00000026679 | 11865 Enkur         |
| ENSMUSG00000048029 | 11866 Eno4          |
| ENSMUSG00000097178 | 11867 2310002F09Rik |
| ENSMUSG00000057072 | 11868 Spata45       |
| ENSMUSG00000037833 | 11869 Sh2d4b        |
| ENSMUSG00000056679 | 11870 Gpr173        |
| ENSMUSG00000017692 | 11871 Rhbdl3        |
| ENSMUSG00000032177 | 11872 Pde4a         |
| ENSMUSG00000034275 | 11873 Igsf9b        |
| ENSMUSG00000032878 | 11874 Ccdc85a       |
| ENSMUSG00000025726 | 11875 Slc28a1       |
| ENSMUSG00000069184 | 11876 Zfp72         |
| ENSMUSG00000031953 | 11877 Tmem170       |
| ENSMUSG00000040013 | 11878 Fkbp6         |
| ENSMUSG00000022075 | 11879 Rhobtb2       |
| ENSMUSG00000105944 | 11880 Gm5075        |
| ENSMUSG00000026563 | 11881 Tada1         |
| ENSMUSG00000040447 | 11882 Spns2         |
| ENSMUSG00000002504 | 11883 Slc9a3r2      |
| ENSMUSG00000082100 | 11884 Glns-ps1      |

|                     |                     |
|---------------------|---------------------|
| ENSMUSG00000031558  | 11885 Slit2         |
| ENSMUSG00000097211  | 11886 BC065403      |
| ENSMUSG00000019437  | 11887 Tlcd1         |
| ENSMUSG00000083856  | 11888 Gm13886       |
| ENSMUSG00000039450  | 11889 Dcxr          |
| ENSMUSG00000086043  | 11890 Gm12473       |
| ENSMUSG00000047238  | 11891 Mageh1        |
| ENSMUSG00000040158  | 11892 Tax1bp3       |
| ENSMUSG00000052632  | 11893 Asap2         |
| ENSMUSG00000070284  | 11894 Gmppb         |
| ENSMUSG00000037627  | 11895 Rgs22         |
| ENSMUSG00000054582  | 11896 Pabpc1l       |
| ENSMUSG00000040562  | 11897 Gstm2         |
| ENSMUSG00000049985  | 11898 Ankrd55       |
| ENSMUSG00000027694  | 11899 Gm8325        |
| ENSMUSG00000020593  | 11900 Lpin1         |
| ENSMUSG00000020253  | 11901 Ppm1m         |
| ENSMUSG00000072949  | 11902 Acot1         |
| ENSMUSG00000028971  | 11903 Cort          |
| ENSMUSG00000054999  | 11904 Naalad1l      |
| ENSMUSG00000000167  | 11905 Pih1d2        |
| ENSMUSG00000087153  | 11906 Gm6483        |
| ENSMUSG00000080829  | 11907 Gm8545        |
| ENSMUSG00000048280  | 11908 Zfp738        |
| ENSMUSG00000026207  | 11909 Speg          |
| ENSMUSG00000099329  | 11910 Gm28052       |
| ENSMUSG00000096006  | 11911 Gm21596       |
| ENSMUSG000000106988 | 11912 Tsg101-ps     |
| ENSMUSG00000086714  | 11913 0610009E02Rik |
| ENSMUSG000000100596 | 11914 Gm29502       |
| ENSMUSG00000048174  | 11915 Tmem81        |
| ENSMUSG00000004371  | 11916 Il11          |
| ENSMUSG00000027965  | 11917 Olfm3         |
| ENSMUSG00000075511  | 11918 1700001L05Rik |
| ENSMUSG00000049556  | 11919 Lingo1        |
| ENSMUSG00000087178  | 11920 A230056P14Rik |
| ENSMUSG00000082194  | 11921 Gm12444       |
| ENSMUSG00000027867  | 11922 Spag17        |
| ENSMUSG000000104887 | 11923 Gm43158       |
| ENSMUSG00000065564  | 11924 Mirlet7b      |
| ENSMUSG00000002280  | 11925 Narfl         |
| ENSMUSG00000025017  | 11926 Pik3ap1       |

|                    |                     |
|--------------------|---------------------|
| ENSMUSG00000065341 | 11927 Gm25579       |
| ENSMUSG00000002325 | 11928 lrf9          |
| ENSMUSG00000086346 | 11929 Gm12510       |
| ENSMUSG00000047617 | 11930 BC029214      |
| ENSMUSG00000023947 | 11931 Nfkbie        |
| ENSMUSG00000025963 | 11932 Mdh1b         |
| ENSMUSG00000090069 | 11933 E430024P14Rik |
| ENSMUSG00000081819 | 11934 Gm12722       |
| ENSMUSG00000027517 | 11935 Ankrd60       |
| ENSMUSG00000084956 | 11936 Gm16194       |
| ENSMUSG00000040629 | 11937 Mael          |
| ENSMUSG00000097743 | 11938 Gm16973       |
| ENSMUSG00000074030 | 11939 Exoc8         |
| ENSMUSG00000107968 | 11940 RP23-263D5.5  |
| ENSMUSG00000070471 | 11941 Erich6        |
| ENSMUSG00000083374 | 11942 Gm11449       |
| ENSMUSG00000059179 | 11943 Gm8991        |
| ENSMUSG00000087659 | 11944 Gm12606       |
| ENSMUSG00000056598 | 11945 Lrrc48        |
| ENSMUSG00000021255 | 11946 Esrrb         |
| ENSMUSG00000037235 | 11947 Mxd4          |
| ENSMUSG00000048164 | 11948 Gm7204        |
| ENSMUSG00000000325 | 11949 Arvcf         |
| ENSMUSG00000027254 | 11950 Map1a         |
| ENSMUSG00000049357 | 11951 4933408B17Rik |
| ENSMUSG00000031539 | 11952 Ap3m2         |
| ENSMUSG00000036928 | 11953 Stag3         |
| ENSMUSG00000054381 | 11954 Zfp747        |
| ENSMUSG00000041144 | 11955 Dnah7b        |
| ENSMUSG00000080717 | 11956 B230307C23Rik |
| ENSMUSG00000031150 | 11957 Ccdc120       |
| ENSMUSG00000048373 | 11958 Fgfbp1        |
| ENSMUSG00000024530 | 11959 Slmo1         |
| ENSMUSG00000086191 | 11960 Zfp652os      |
| ENSMUSG00000074818 | 11961 Pdzd7         |
| ENSMUSG00000027894 | 11962 Slc6a17       |
| ENSMUSG00000041000 | 11963 Trim62        |
| ENSMUSG00000070371 | 11964 Prss36        |
| ENSMUSG00000075330 | 11965 A930003A15Rik |
| ENSMUSG00000038074 | 11966 Fkbp14        |
| ENSMUSG00000073640 | 11967 Rpl27-ps3     |
| ENSMUSG00000036052 | 11968 Dnajb5        |

|                    |                      |
|--------------------|----------------------|
| ENSMUSG00000057594 | 11969 Arl16          |
| ENSMUSG00000088909 | 11970 Gm25432        |
| ENSMUSG00000079387 | 11971 Luzp4          |
| ENSMUSG00000082870 | 11972 Gm12165        |
| ENSMUSG00000030263 | 11973 Lrmp           |
| ENSMUSG00000026102 | 11974 Inpp1          |
| ENSMUSG00000028217 | 11975 Cdh17          |
| ENSMUSG00000026841 | 11976 Fibcd1         |
| ENSMUSG00000042498 | 11977 D330045A20Rik  |
| ENSMUSG00000041187 | 11978 Prkd2          |
| ENSMUSG00000027978 | 11979 Prss12         |
| ENSMUSG00000058073 | 11980 Gm11189        |
| ENSMUSG00000101481 | 11981 1700123O21Rik  |
| ENSMUSG00000044938 | 11982 Klhl31         |
| ENSMUSG00000040624 | 11983 Plekhg1        |
| ENSMUSG00000084284 | 11984 Tpt1-ps6       |
| ENSMUSG00000004151 | 11985 Etv1           |
| ENSMUSG00000020364 | 11986 Zfp354a        |
| ENSMUSG00000002108 | 11987 Nr1h3          |
| ENSMUSG00000061669 | 11988 Rpl34-ps2      |
| ENSMUSG00000035042 | 11989 Ccl5           |
| ENSMUSG00000020218 | 11990 Wif1           |
| ENSMUSG00000028017 | 11991 Egf            |
| ENSMUSG00000026039 | 11992 Sgol2a         |
| ENSMUSG00000026301 | 11993 Iqca           |
| ENSMUSG00000043257 | 11994 Pigv           |
| ENSMUSG00000070705 | 11995 Eid2b          |
| ENSMUSG00000070305 | 11996 Mpzl3          |
| ENSMUSG00000058586 | 11997 Serhl          |
| ENSMUSG00000032356 | 11998 Rasgrf1        |
| ENSMUSG00000031397 | 11999 Tktl1          |
| ENSMUSG00000107597 | 12000 RP24-315D19.11 |
| ENSMUSG00000042097 | 12001 Zfp239         |
| ENSMUSG00000061578 | 12002 Ksr2           |
| ENSMUSG00000038534 | 12003 Osbpl7         |
| ENSMUSG00000081277 | 12004 Gm15285        |
| ENSMUSG00000105704 | 12005 Gm43055        |
| ENSMUSG00000038370 | 12006 Pcp4l1         |
| ENSMUSG00000087596 | 12007 Gm11715        |
| ENSMUSG00000030771 | 12008 Micalcl        |
| ENSMUSG00000048550 | 12009 Thnsl1         |
| ENSMUSG00000034685 | 12010 Fam171a2       |

|                    |                     |
|--------------------|---------------------|
| ENSMUSG00000073236 | 12011 2500004C02Rik |
| ENSMUSG00000061118 | 12012 Dnajc30       |
| ENSMUSG00000097893 | 12013 1700034P13Rik |
| ENSMUSG00000024235 | 12014 Map3k8        |
| ENSMUSG00000003452 | 12015 Bicd1         |
| ENSMUSG00000051351 | 12016 Zfp46         |
| ENSMUSG00000031196 | 12017 F8            |
| ENSMUSG00000043833 | 12018 2900005J15Rik |
| ENSMUSG00000045268 | 12019 Zfp691        |
| ENSMUSG00000039716 | 12020 Dock3         |
| ENSMUSG00000053173 | 12021 Rpl18-ps2     |
| ENSMUSG00000024897 | 12022 Apba1         |
| ENSMUSG00000040139 | 12023 9430038I01Rik |
| ENSMUSG00000026295 | 12024 Spp2          |
| ENSMUSG00000080727 | 12025 C920021L13Rik |
| ENSMUSG00000022894 | 12026 Adamts5       |
| ENSMUSG00000037971 | 12027 1110032A03Rik |
| ENSMUSG00000028546 | 12028 Elavl4        |
| ENSMUSG00000087165 | 12029 2010001A14Rik |
| ENSMUSG00000052760 | 12030 A630001G21Rik |
| ENSMUSG00000070709 | 12031 1700049G17Rik |
| ENSMUSG00000029369 | 12032 Afm           |
| ENSMUSG00000039617 | 12033 Gm7488        |
| ENSMUSG00000027796 | 12034 Smad9         |
| ENSMUSG00000036242 | 12035 3632451O06Rik |
| ENSMUSG00000082718 | 12036 Gm14928       |
| ENSMUSG00000104614 | 12037 Fbxw27        |
| ENSMUSG00000015243 | 12038 Abca1         |
| ENSMUSG00000026110 | 12039 Mgat4a        |
| ENSMUSG00000058935 | 12040 1700018C11Rik |
| ENSMUSG00000075324 | 12041 Fign          |
| ENSMUSG00000051984 | 12042 Sec31b        |
| ENSMUSG00000024793 | 12043 Tnfrsf25      |
| ENSMUSG00000084104 | 12044 Gm13578       |
| ENSMUSG00000081455 | 12045 Hmgb1-ps3     |
| ENSMUSG00000079109 | 12046 Pms2          |
| ENSMUSG00000031635 | 12047 Anxa10        |
| ENSMUSG00000062563 | 12048 Cys1          |
| ENSMUSG00000029209 | 12049 Gnpda2        |
| ENSMUSG00000022159 | 12050 Rab2b         |
| ENSMUSG00000005360 | 12051 Slc1a3        |
| ENSMUSG00000003585 | 12052 Sec14l2       |

|                     |                     |
|---------------------|---------------------|
| ENSMUSG00000059674  | 12053 Cdh24         |
| ENSMUSG00000032419  | 12054 Tbx18         |
| ENSMUSG00000074071  | 12055 Fam169b       |
| ENSMUSG000000107961 | 12056 RP23-20K24.11 |
| ENSMUSG00000022747  | 12057 St3gal6       |
| ENSMUSG00000097010  | 12058 Gm26709       |
| ENSMUSG00000097059  | 12059 Fam120aos     |
| ENSMUSG00000029162  | 12060 Khk           |
| ENSMUSG00000071847  | 12061 Apccd1        |
| ENSMUSG000000107689 | 12062 RP23-281H4.12 |
| ENSMUSG00000043572  | 12063 Pars2         |
| ENSMUSG00000033739  | 12064 Fkbpl         |
| ENSMUSG000000100551 | 12065 Gm19503       |
| ENSMUSG00000055805  | 12066 Fmn1          |
| ENSMUSG00000080747  | 12067 Gm14016       |
| ENSMUSG00000042485  | 12068 Mustn1        |
| ENSMUSG00000021139  | 12069 Gm20498       |
| ENSMUSG00000040296  | 12070 Ddx58         |
| ENSMUSG00000091216  | 12071 Gm17208       |
| ENSMUSG00000020698  | 12072 Cct6b         |
| ENSMUSG00000059252  | 12073 Tpt1-ps5      |
| ENSMUSG00000021086  | 12074 Ccdc175       |
| ENSMUSG00000083179  | 12075 Gm12693       |
| ENSMUSG000000107019 | 12076 Gm43682       |
| ENSMUSG00000018581  | 12077 Dnah11        |
| ENSMUSG00000080824  | 12078 Gm9001        |
| ENSMUSG00000062896  | 12079 Rpl31-ps11    |
| ENSMUSG00000024873  | 12080 Cnih2         |
| ENSMUSG00000092083  | 12081 Kcnb2         |
| ENSMUSG00000083282  | 12082 Ctsf          |
| ENSMUSG00000023467  | 12083 Tulp2         |
| ENSMUSG00000073678  | 12084 Pgap1         |
| ENSMUSG00000060332  | 12085 Tmc2          |
| ENSMUSG00000069188  | 12086 Gm13192       |
| ENSMUSG00000000247  | 12087 Lhx2          |
| ENSMUSG00000081329  | 12088 Gm12492       |
| ENSMUSG00000030022  | 12089 Adamts9       |
| ENSMUSG00000050108  | 12090 Bpifc         |
| ENSMUSG00000036551  | 12091 Akap14        |
| ENSMUSG00000043467  | 12092 Zbtb37        |
| ENSMUSG00000083242  | 12093 Gm15659       |
| ENSMUSG00000038152  | 12094 5033430I15Rik |



|                     |                     |
|---------------------|---------------------|
| ENSMUSG00000040985  | 12095 Sun3          |
| ENSMUSG00000022383  | 12096 Ppara         |
| ENSMUSG00000047656  | 12097 Trpt1         |
| ENSMUSG00000061046  | 12098 Hagh1         |
| ENSMUSG00000094320  | 12099 Gm13202       |
| ENSMUSG00000022620  | 12100 Arsa          |
| ENSMUSG00000078670  | 12101 Fam174b       |
| ENSMUSG00000068748  | 12102 Ptprz1        |
| ENSMUSG00000032502  | 12103 Stac          |
| ENSMUSG00000032259  | 12104 Drd2          |
| ENSMUSG00000029925  | 12105 Tbxas1        |
| ENSMUSG00000092252  | 12106 Gm20499       |
| ENSMUSG000000106390 | 12107 Gm5551        |
| ENSMUSG00000063160  | 12108 Numbl         |
| ENSMUSG00000091183  | 12109 Gm5141        |
| ENSMUSG00000054757  | 12110 Akr1c20       |
| ENSMUSG00000026941  | 12111 Mamdc4        |
| ENSMUSG00000086739  | 12112 Gm4409        |
| ENSMUSG000000100347 | 12113 Gm7895        |
| ENSMUSG00000083307  | 12114 AA414768      |
| ENSMUSG00000079177  | 12115 Fam228a       |
| ENSMUSG00000022018  | 12116 Rgcc          |
| ENSMUSG00000024395  | 12117 Lims2         |
| ENSMUSG00000044268  | 12118 Gm4895        |
| ENSMUSG00000048921  | 12119 Zfp689        |
| ENSMUSG00000040649  | 12120 Rimklb        |
| ENSMUSG00000079659  | 12121 Tmem243       |
| ENSMUSG00000051107  | 12122 Gm15440       |
| ENSMUSG00000006575  | 12123 Rundc3a       |
| ENSMUSG00000028172  | 12124 Tacr3         |
| ENSMUSG00000085586  | 12125 Gm11613       |
| ENSMUSG00000046447  | 12126 Camk2n1       |
| ENSMUSG00000066896  | 12127 Olfr18        |
| ENSMUSG00000006542  | 12128 Prkag3        |
| ENSMUSG00000024247  | 12129 Pkdcc         |
| ENSMUSG00000046269  | 12130 Usp27x        |
| ENSMUSG00000039195  | 12131 1110008P14Rik |
| ENSMUSG00000090952  | 12132 Gm17251       |
| ENSMUSG00000082539  | 12133 Gm15207       |
| ENSMUSG00000026255  | 12134 Efhd1         |
| ENSMUSG00000058900  | 12135 Rsl1          |
| ENSMUSG00000063260  | 12136 Syt10         |

|                    |                     |
|--------------------|---------------------|
| ENSMUSG00000021301 | 12137 Hecw1         |
| ENSMUSG00000062691 | 12138 Cebpzos       |
| ENSMUSG00000029163 | 12139 Emilin1       |
| ENSMUSG00000024403 | 12140 Atp6v1g2      |
| ENSMUSG00000040136 | 12141 Abcc8         |
| ENSMUSG00000004885 | 12142 Crabp2        |
| ENSMUSG00000079427 | 12143 Mthfsl        |
| ENSMUSG00000094942 | 12144 Gm3604        |
| ENSMUSG00000031554 | 12145 Adam5         |
| ENSMUSG00000035722 | 12146 Abca7         |
| ENSMUSG00000094786 | 12147 Gm14403       |
| ENSMUSG00000051224 | 12148 Tceanc        |
| ENSMUSG00000027460 | 12149 Angpt4        |
| ENSMUSG00000027489 | 12150 Necab3        |
| ENSMUSG00000040631 | 12151 Dok4          |
| ENSMUSG00000032908 | 12152 Sgpp2         |
| ENSMUSG00000061411 | 12153 Nol4l         |
| ENSMUSG00000024059 | 12154 Clip4         |
| ENSMUSG00000022180 | 12155 Slc7a8        |
| ENSMUSG00000020077 | 12156 Srgn          |
| ENSMUSG00000024033 | 12157 Rsph1         |
| ENSMUSG00000049904 | 12158 Tmem17        |
| ENSMUSG00000039529 | 12159 Atp8b1        |
| ENSMUSG00000025961 | 12160 4933402D24Rik |
| ENSMUSG00000039814 | 12161 Xkr5          |
| ENSMUSG00000038402 | 12162 Foxf2         |
| ENSMUSG00000091055 | 12163 Siglec15      |
| ENSMUSG00000078868 | 12164 Gm14412       |
| ENSMUSG00000029658 | 12165 Wdr95         |
| ENSMUSG00000033900 | 12166 Map9          |
| ENSMUSG00000056771 | 12167 Gm10010       |
| ENSMUSG00000074873 | 12168 Al606181      |
| ENSMUSG00000039579 | 12169 Grin3a        |
| ENSMUSG00000027495 | 12170 Fam210b       |
| ENSMUSG00000074243 | 12171 Gm10651       |
| ENSMUSG00000092074 | 12172 Dynlt1a       |
| ENSMUSG00000059772 | 12173 Slx1b         |
| ENSMUSG00000048261 | 12174 Gm4879        |
| ENSMUSG00000010307 | 12175 Tmem86a       |
| ENSMUSG00000082108 | 12176 Gm13777       |
| ENSMUSG00000064202 | 12177 4430402I18Rik |
| ENSMUSG00000094242 | 12178 Gm5456        |

|                    |                     |
|--------------------|---------------------|
| ENSMUSG00000097927 | 12179 Gm6999        |
| ENSMUSG00000054702 | 12180 Ap1s3         |
| ENSMUSG00000041782 | 12181 Lad1          |
| ENSMUSG00000071640 | 12182 Stxbp3-ps     |
| ENSMUSG00000096145 | 12183 Vkorc1        |
| ENSMUSG00000096199 | 12184 Ptrhd1        |
| ENSMUSG00000073045 | 12185 Gm5570        |
| ENSMUSG00000042099 | 12186 Kank3         |
| ENSMUSG00000023046 | 12187 Igfbp6        |
| ENSMUSG00000087591 | 12188 Gm14635       |
| ENSMUSG00000091177 | 12189 Gm15494       |
| ENSMUSG00000085207 | 12190 Gm11767       |
| ENSMUSG00000024617 | 12191 Camk2a        |
| ENSMUSG00000020870 | 12192 Cdc34-ps      |
| ENSMUSG00000032064 | 12193 Dixdc1        |
| ENSMUSG00000025787 | 12194 Tgm4          |
| ENSMUSG00000028555 | 12195 Ttc39a        |
| ENSMUSG00000015377 | 12196 Dennd6b       |
| ENSMUSG00000024799 | 12197 Tm7sf2        |
| ENSMUSG00000050702 | 12198 4930563M21Rik |
| ENSMUSG00000081669 | 12199 Npm3-ps1      |
| ENSMUSG00000066245 | 12200 Gm10156       |
| ENSMUSG00000034538 | 12201 Zfp418        |
| ENSMUSG00000087943 | 12202 Gm24245       |
| ENSMUSG00000027605 | 12203 Acss2         |
| ENSMUSG00000049493 | 12204 Pls1          |
| ENSMUSG00000067825 | 12205 Pex26         |
| ENSMUSG00000078752 | 12206 Scgb1b30      |
| ENSMUSG00000057191 | 12207 AB124611      |
| ENSMUSG00000058665 | 12208 En1           |
| ENSMUSG00000086544 | 12209 Chn1os3       |
| ENSMUSG00000002057 | 12210 Foxn1         |
| ENSMUSG00000022367 | 12211 Has2          |
| ENSMUSG00000031860 | 12212 Pbx4          |
| ENSMUSG00000058046 | 12213 4933430I17Rik |
| ENSMUSG00000059430 | 12214 Actg2         |
| ENSMUSG00000006906 | 12215 Stambp        |
| ENSMUSG00000099328 | 12216 Gm28011       |
| ENSMUSG00000062933 | 12217 Gm10123       |
| ENSMUSG00000032875 | 12218 Arhgef17      |
| ENSMUSG00000100732 | 12219 1700110I07Rik |
| ENSMUSG00000033409 | 12220 Syce1l        |

|                    |                     |
|--------------------|---------------------|
| ENSMUSG00000096557 | 12221 Gm7258        |
| ENSMUSG00000025226 | 12222 Fbxl15        |
| ENSMUSG00000097781 | 12223 9330136K24Rik |
| ENSMUSG00000043644 | 12224 0610009L18Rik |
| ENSMUSG00000047246 | 12225 Hist1h2be     |
| ENSMUSG00000025528 | 12226 2010106E10Rik |
| ENSMUSG00000047067 | 12227 Dusp28        |
| ENSMUSG00000094281 | 12228 Gm8034        |
| ENSMUSG00000057123 | 12229 Gja5          |
| ENSMUSG00000049653 | 12230 Spatc1        |
| ENSMUSG00000059921 | 12231 Unc5c         |
| ENSMUSG00000061847 | 12232 Defb39        |
| ENSMUSG00000081010 | 12233 Gm13880       |
| ENSMUSG00000049285 | 12234 Mblac1        |
| ENSMUSG00000026430 | 12235 Rassf5        |
| ENSMUSG00000081255 | 12236 Gm5380        |
| ENSMUSG00000082145 | 12237 Gm12312       |
| ENSMUSG00000079057 | 12238 Cyp4v3        |
| ENSMUSG00000021913 | 12239 Ogdhl         |
| ENSMUSG00000080716 | 12240 Gm13503       |
| ENSMUSG00000083496 | 12241 Gm11263       |
| ENSMUSG00000095385 | 12242 D630033O11Rik |
| ENSMUSG00000098557 | 12243 Kctd12        |
| ENSMUSG00000042433 | 12244 Pih1h3b       |
| ENSMUSG00000019822 | 12245 Smpd2         |
| ENSMUSG00000020150 | 12246 Gamt          |
| ENSMUSG00000079061 | 12247 Gm11042       |
| ENSMUSG00000042340 | 12248 Ctf1          |
| ENSMUSG00000045176 | 12249 Borcs6        |
| ENSMUSG00000039217 | 12250 Il18          |
| ENSMUSG00000047123 | 12251 Ticam1        |
| ENSMUSG00000083780 | 12252 Gm12728       |
| ENSMUSG00000099034 | 12253 2810039B14Rik |
| ENSMUSG00000071256 | 12254 Zfp213        |
| ENSMUSG00000050830 | 12255 Vwc2          |
| ENSMUSG00000031871 | 12256 Cdh5          |
| ENSMUSG00000022843 | 12257 Clcn2         |
| ENSMUSG00000030889 | 12258 Vwa3a         |
| ENSMUSG00000061186 | 12259 Sfmbt2        |
| ENSMUSG00000021631 | 12260 Mrps36-ps1    |
| ENSMUSG00000102644 | 12261 Thap6         |
| ENSMUSG00000020785 | 12262 Camkk1        |

|                    |                     |
|--------------------|---------------------|
| ENSMUSG00000054708 | 12263 Ankrd24       |
| ENSMUSG00000073733 | 12264 Rsg1          |
| ENSMUSG00000102817 | 12265 Gm6185        |
| ENSMUSG00000037490 | 12266 Slc2a12       |
| ENSMUSG00000061531 | 12267 Tmem236       |
| ENSMUSG00000043629 | 12268 1700019D03Rik |
| ENSMUSG00000025473 | 12269 Adam8         |
| ENSMUSG00000050394 | 12270 Armcx6        |
| ENSMUSG00000048895 | 12271 Cdk5r1        |
| ENSMUSG00000051375 | 12272 Pcdh1         |
| ENSMUSG00000056592 | 12273 Zfp658        |
| ENSMUSG00000083346 | 12274 Gm8260        |
| ENSMUSG00000018604 | 12275 Tbx3          |
| ENSMUSG00000101309 | 12276 Gm29397       |
| ENSMUSG00000026686 | 12277 Lmx1a         |
| ENSMUSG00000003271 | 12278 Sult2b1       |
| ENSMUSG00000026726 | 12279 Cubn          |
| ENSMUSG00000086368 | 12280 Gm13830       |
| ENSMUSG00000027961 | 12281 Lrrc39        |
| ENSMUSG00000074211 | 12282 Sdhaf1        |
| ENSMUSG00000097021 | 12283 4933433G15Rik |
| ENSMUSG00000090326 | 12284 Dthd1         |
| ENSMUSG00000062743 | 12285 Zfp677        |
| ENSMUSG00000087481 | 12286 Gm15608       |
| ENSMUSG00000039546 | 12287 Ajap1         |
| ENSMUSG00000105439 | 12288 Gm42806       |
| ENSMUSG00000086221 | 12289 4930412B13Rik |
| ENSMUSG00000093606 | 12290 B130034C11Rik |
| ENSMUSG00000038593 | 12291 Tctn1         |
| ENSMUSG00000096929 | 12292 A330023F24Rik |
| ENSMUSG00000086093 | 12293 Gm15341       |
| ENSMUSG00000053226 | 12294 Dand5         |
| ENSMUSG00000084866 | 12295 A930006K02Rik |
| ENSMUSG00000078134 | 12296 Gm12355       |
| ENSMUSG00000022615 | 12297 Tymp          |
| ENSMUSG00000103383 | 12298 Gm37754       |
| ENSMUSG00000021898 | 12299 Asb14         |
| ENSMUSG00000057069 | 12300 Ero1lb        |
| ENSMUSG00000036131 | 12301 Frmd7         |
| ENSMUSG00000031274 | 12302 Col4a5        |
| ENSMUSG00000022941 | 12303 Ripply3       |
| ENSMUSG00000022054 | 12304 Nefm          |

|                    |                     |
|--------------------|---------------------|
| ENSMUSG00000029596 | 12305 Sdsl          |
| ENSMUSG00000000903 | 12306 Vpreb3        |
| ENSMUSG00000074793 | 12307 Hspa12b       |
| ENSMUSG00000087360 | 12308 Gm15104       |
| ENSMUSG00000035681 | 12309 Kcnc2         |
| ENSMUSG00000082064 | 12310 Rpl5-ps2      |
| ENSMUSG00000085701 | 12311 Gm12968       |
| ENSMUSG00000085054 | 12312 Gm15834       |
| ENSMUSG00000083832 | 12313 Gm13771       |
| ENSMUSG00000097649 | 12314 Gm10561       |
| ENSMUSG00000091086 | 12315 Gm5428        |
| ENSMUSG00000035678 | 12316 Tnfsf9        |
| ENSMUSG00000068466 | 12317 Gm5518        |
| ENSMUSG00000079356 | 12318 Mettl4-ps1    |
| ENSMUSG00000073096 | 12319 Lrrc61        |
| ENSMUSG00000082253 | 12320 Gm14639       |
| ENSMUSG00000061540 | 12321 Orm2          |
| ENSMUSG00000108370 | 12322 RP24-490A22.8 |
| ENSMUSG00000056724 | 12323 Nbeal2        |
| ENSMUSG00000032968 | 12324 Inha          |
| ENSMUSG00000089956 | 12325 Gm16553       |
| ENSMUSG00000042873 | 12326 Lhfpl4        |
| ENSMUSG00000097803 | 12327 Rpl31-ps16    |
| ENSMUSG00000084817 | 12328 Gm5526        |
| ENSMUSG00000104788 | 12329 Gm36448       |
| ENSMUSG00000032489 | 12330 Kif9          |
| ENSMUSG00000058715 | 12331 Fcer1g        |
| ENSMUSG00000097504 | 12332 4930516B21Rik |
| ENSMUSG00000034173 | 12333 Zbed5         |
| ENSMUSG00000050556 | 12334 Kcnb1         |
| ENSMUSG00000031574 | 12335 Star          |
| ENSMUSG00000038241 | 12336 Cep250        |
| ENSMUSG00000097574 | 12337 C920006O11Rik |
| ENSMUSG00000041842 | 12338 Fhdc1         |
| ENSMUSG00000037754 | 12339 Ppp1r16b      |
| ENSMUSG00000074139 | 12340 1700057G04Rik |
| ENSMUSG00000056155 | 12341 Nanos3        |
| ENSMUSG00000046764 | 12342 A530053G22Rik |
| ENSMUSG00000025815 | 12343 Dhdkd1        |
| ENSMUSG00000086451 | 12344 4933431K23Rik |
| ENSMUSG00000041552 | 12345 Ptchd1        |
| ENSMUSG00000061482 | 12346 Hist1h4d      |

|                    |                     |
|--------------------|---------------------|
| ENSMUSG00000065489 | 12347 Mir365-2      |
| ENSMUSG00000081309 | 12348 Gm12397       |
| ENSMUSG00000075279 | 12349 Mrpl23-ps1    |
| ENSMUSG00000029798 | 12350 Herc6         |
| ENSMUSG00000045275 | 12351 Lca5l         |
| ENSMUSG00000021499 | 12352 Catsper3      |
| ENSMUSG00000006464 | 12353 Bbs1          |
| ENSMUSG00000103690 | 12354 A730004F24Rik |
| ENSMUSG00000048939 | 12355 Atp13a5       |
| ENSMUSG00000070737 | 12356 Gm12942       |
| ENSMUSG00000108723 | 12357 RP23-324J22.6 |
| ENSMUSG00000082185 | 12358 Gm12428       |
| ENSMUSG00000042195 | 12359 Slc35f2       |
| ENSMUSG00000019734 | 12360 Tmc4          |
| ENSMUSG00000054976 | 12361 Nyap2         |
| ENSMUSG00000089999 | 12362 Gm6485        |
| ENSMUSG00000082709 | 12363 Gm12362       |
| ENSMUSG00000063415 | 12364 Cyp26b1       |
| ENSMUSG00000043705 | 12365 Capn13        |
| ENSMUSG00000092239 | 12366 1700031A10Rik |
| ENSMUSG00000106589 | 12367 4931419H13Rik |
| ENSMUSG00000086697 | 12368 4933427G23Rik |
| ENSMUSG00000081453 | 12369 Gm6767        |
| ENSMUSG00000096974 | 12370 Gm26881       |
| ENSMUSG00000050914 | 12371 Ankrd37       |
| ENSMUSG00000066189 | 12372 Cacng3        |
| ENSMUSG00000028294 | 12373 1700003M02Rik |
| ENSMUSG00000038598 | 12374 Al481877      |
| ENSMUSG00000030400 | 12375 Ercc2         |
| ENSMUSG00000041907 | 12376 Gpr45         |
| ENSMUSG00000016356 | 12377 Col20a1       |
| ENSMUSG00000099779 | 12378 Gm8228        |
| ENSMUSG00000086207 | 12379 Gm14717       |
| ENSMUSG00000039742 | 12380 Fam71f1       |
| ENSMUSG00000086725 | 12381 A630052C17Rik |
| ENSMUSG00000038094 | 12382 Atp13a4       |
| ENSMUSG00000002847 | 12383 Pla1a         |
| ENSMUSG00000032313 | 12384 Al118078      |
| ENSMUSG00000042599 | 12385 Kdm7a         |
| ENSMUSG00000056204 | 12386 Pgpep1        |
| ENSMUSG00000097318 | 12387 1700007L15Rik |
| ENSMUSG00000020660 | 12388 Pomc          |

|                    |                    |
|--------------------|--------------------|
| ENSMUSG00000057228 | 12389 Aadat        |
| ENSMUSG00000048766 | 12390 Skint10      |
| ENSMUSG00000027820 | 12391 Mme          |
| ENSMUSG00000006586 | 12392 Runx1t1      |
| ENSMUSG00000026646 | 12393 Suv39h2      |
| ENSMUSG00000087120 | 12394 Gm12279      |
| ENSMUSG00000028776 | 12395 Tinagl1      |
| ENSMUSG00000103009 | 12396 Gm4430       |
| ENSMUSG00000084274 | 12397 Gm12504      |
| ENSMUSG00000071042 | 12398 Rasgrp3      |
| ENSMUSG00000067001 | 12399 Serpinb7     |
| ENSMUSG00000009876 | 12400 Cox4i2       |
| ENSMUSG00000085351 | 12401 Gm12472      |
| ENSMUSG00000040016 | 12402 Ptger3       |
| ENSMUSG00000053985 | 12403 Zfp14        |
| ENSMUSG00000062861 | 12404 Zfp28        |
| ENSMUSG00000027831 | 12405 Veph1        |
| ENSMUSG00000048031 | 12406 Fcrl5        |
| ENSMUSG00000030228 | 12407 Pik3c2g      |
| ENSMUSG00000082951 | 12408 Gm13359      |
| ENSMUSG00000044288 | 12409 Cnr1         |
| ENSMUSG00000097901 | 12410 Gm26680      |
| ENSMUSG00000001313 | 12411 Rnd2         |
| ENSMUSG00000035109 | 12412 Shc4         |
| ENSMUSG00000042759 | 12413 Apobr        |
| ENSMUSG00000101841 | 12414 Gm11993      |
| ENSMUSG00000037085 | 12415 Trmt12       |
| ENSMUSG00000090093 | 12416 Gm14399      |
| ENSMUSG00000108350 | 12417 RP24-174G2.1 |
| ENSMUSG00000071343 | 12418 Gm10327      |
| ENSMUSG00000096433 | 12419 Gm4944       |
| ENSMUSG00000044122 | 12420 Proca1       |
| ENSMUSG00000053930 | 12421 Shisa6       |
| ENSMUSG00000038421 | 12422 Fcrla        |
| ENSMUSG00000054000 | 12423 Tusc1        |
| ENSMUSG00000020744 | 12424 Slc25a19     |
| ENSMUSG00000075574 | 12425 Defb48       |
| ENSMUSG00000040690 | 12426 Col16a1      |
| ENSMUSG00000028621 | 12427 Cyb5rl       |
| ENSMUSG00000102609 | 12428 Gm18432      |
| ENSMUSG00000037738 | 12429 Nek5         |
| ENSMUSG00000032500 | 12430 Dclk3        |



|                     |                     |
|---------------------|---------------------|
| ENSMUSG00000020140  | 12431 Lgr5          |
| ENSMUSG00000074024  | 12432 4632427E13Rik |
| ENSMUSG00000070419  | 12433 Cyp3a57       |
| ENSMUSG00000027611  | 12434 Procr         |
| ENSMUSG00000078864  | 12435 Gm14322       |
| ENSMUSG00000073077  | 12436 Gm7173        |
| ENSMUSG00000098021  | 12437 Gm9522        |
| ENSMUSG00000024728  | 12438 1700025F22Rik |
| ENSMUSG00000084124  | 12439 Gm13588       |
| ENSMUSG00000079434  | 12440 Neu2          |
| ENSMUSG00000027932  | 12441 Slc27a3       |
| ENSMUSG00000021990  | 12442 Spata13       |
| ENSMUSG00000041347  | 12443 Bdkrb1        |
| ENSMUSG00000035246  | 12444 Pcyt1b        |
| ENSMUSG00000030827  | 12445 Fgf21         |
| ENSMUSG00000048065  | 12446 Cyb5r2        |
| ENSMUSG00000002910  | 12447 Arrdc2        |
| ENSMUSG00000053182  | 12448 Gm609         |
| ENSMUSG000000100760 | 12449 Gm4035        |
| ENSMUSG00000090641  | 12450 Zfp712        |
| ENSMUSG00000079469  | 12451 Pigb          |
| ENSMUSG00000032202  | 12452 Rab27a        |
| ENSMUSG000000104932 | 12453 Gm42485       |
| ENSMUSG000000105408 | 12454 Gm7285        |
| ENSMUSG00000021367  | 12455 Edn1          |
| ENSMUSG00000075585  | 12456 6330403L08Rik |
| ENSMUSG00000085860  | 12457 2410003L11Rik |
| ENSMUSG000000106239 | 12458 Gm9260        |
| ENSMUSG00000032657  | 12459 Fam189b       |
| ENSMUSG00000047603  | 12460 Zfp235        |
| ENSMUSG00000085287  | 12461 4833418N02Rik |
| ENSMUSG00000040359  | 12462 Ufl1          |
| ENSMUSG00000023885  | 12463 Thbs2         |
| ENSMUSG00000041592  | 12464 Sdk2          |
| ENSMUSG00000031775  | 12465 Plip          |
| ENSMUSG00000022181  | 12466 C6            |
| ENSMUSG00000061878  | 12467 Sphk1         |
| ENSMUSG00000034353  | 12468 Ramp1         |
| ENSMUSG00000002617  | 12469 Zfp40         |
| ENSMUSG00000051169  | 12470 Rpusd3        |
| ENSMUSG00000082189  | 12471 Gm4784        |
| ENSMUSG00000025013  | 12472 Tll2          |

|                     |                     |
|---------------------|---------------------|
| ENSMUSG00000087502  | 12473 Gm16091       |
| ENSMUSG00000011267  | 12474 Zfp296        |
| ENSMUSG00000029377  | 12475 Ereg          |
| ENSMUSG00000026893  | 12476 Gca           |
| ENSMUSG00000063239  | 12477 Grm4          |
| ENSMUSG00000003282  | 12478 Plag1         |
| ENSMUSG000000087301 | 12479 Gm13629       |
| ENSMUSG00000045251  | 12480 Zfp688        |
| ENSMUSG00000032889  | 12481 Gm6685        |
| ENSMUSG00000016510  | 12482 Mtif3         |
| ENSMUSG00000019590  | 12483 Cyb561        |
| ENSMUSG000000081389 | 12484 Gm13368       |
| ENSMUSG000000102270 | 12485 Gm8388        |
| ENSMUSG00000042616  | 12486 Oscp1         |
| ENSMUSG00000029771  | 12487 Irf5          |
| ENSMUSG000000049109 | 12488 Themis        |
| ENSMUSG000000087647 | 12489 Gm15407       |
| ENSMUSG000000058966 | 12490 Fam57b        |
| ENSMUSG000000087269 | 12491 D330023K18Rik |
| ENSMUSG000000085267 | 12492 Gm14235       |
| ENSMUSG000000034151 | 12493 Zbbx          |
| ENSMUSG000000087132 | 12494 A930001C03Rik |
| ENSMUSG000000057337 | 12495 Chst3         |
| ENSMUSG000000026791 | 12496 Slc2a8        |
| ENSMUSG000000025933 | 12497 Tmem14a       |
| ENSMUSG00000018830  | 12498 Myh11         |
| ENSMUSG000000032611 | 12499 1700102P08Rik |
| ENSMUSG000000056665 | 12500 Them6         |
| ENSMUSG000000023266 | 12501 Frs3          |
| ENSMUSG000000041046 | 12502 Ramp3         |
| ENSMUSG000000019178 | 12503 Styxl1        |
| ENSMUSG000000026018 | 12504 Ica1l         |
| ENSMUSG000000053101 | 12505 Gpr141        |
| ENSMUSG000000022330 | 12506 Osr2          |
| ENSMUSG000000108034 | 12507 RP23-130D15.6 |
| ENSMUSG000000082683 | 12508 Gm12697       |
| ENSMUSG000000027524 | 12509 Edn3          |
| ENSMUSG000000030510 | 12510 Cers3         |
| ENSMUSG000000033961 | 12511 Zfp446        |
| ENSMUSG000000035929 | 12512 H2-Q4         |
| ENSMUSG000000054951 | 12513 9130008F23Rik |
| ENSMUSG000000097410 | 12514 Gm26668       |

|                    |                     |
|--------------------|---------------------|
| ENSMUSG00000024245 | 12515 Tmem178       |
| ENSMUSG00000041020 | 12516 Map7d2        |
| ENSMUSG00000105452 | 12517 Gm5276        |
| ENSMUSG00000019564 | 12518 Arid3a        |
| ENSMUSG00000037868 | 12519 Egr2          |
| ENSMUSG00000091408 | 12520 Gm6728        |
| ENSMUSG00000051323 | 12521 Pcdh19        |
| ENSMUSG00000010064 | 12522 Slc38a3       |
| ENSMUSG00000045055 | 12523 Rpsa-ps2      |
| ENSMUSG00000037370 | 12524 Enpp1         |
| ENSMUSG00000085664 | 12525 Atxn7l1os2    |
| ENSMUSG00000108107 | 12526 RP24-327l4.7  |
| ENSMUSG00000036923 | 12527 Stox1         |
| ENSMUSG00000079278 | 12528 Tmem233       |
| ENSMUSG00000026645 | 12529 Olah          |
| ENSMUSG00000003070 | 12530 Efna2         |
| ENSMUSG00000086860 | 12531 Gm1720        |
| ENSMUSG00000020461 | 12532 Clhc1         |
| ENSMUSG00000027765 | 12533 P2ry1         |
| ENSMUSG00000086691 | 12534 Gm15432       |
| ENSMUSG00000063875 | 12535 Rps6-ps1      |
| ENSMUSG00000032291 | 12536 Crabp1        |
| ENSMUSG00000083688 | 12537 Gm13743       |
| ENSMUSG00000030134 | 12538 Rasgef1a      |
| ENSMUSG00000079235 | 12539 Ccdc13        |
| ENSMUSG00000031760 | 12540 Mt3           |
| ENSMUSG00000062101 | 12541 Zfp119b       |
| ENSMUSG00000005220 | 12542 Corin         |
| ENSMUSG00000026288 | 12543 Inpp5d        |
| ENSMUSG00000085956 | 12544 4930481B07Rik |
| ENSMUSG00000002771 | 12545 Grin2d        |
| ENSMUSG00000104707 | 12546 Gm43649       |
| ENSMUSG00000059824 | 12547 Dbp           |
| ENSMUSG00000105189 | 12548 Gm7774        |
| ENSMUSG00000086687 | 12549 4930547E08Rik |
| ENSMUSG00000053279 | 12550 Aldh1a1       |
| ENSMUSG00000085485 | 12551 Gm14024       |
| ENSMUSG00000005763 | 12552 Cd247         |
| ENSMUSG00000001865 | 12553 Cpa3          |
| ENSMUSG00000099997 | 12554 Tubb4b-ps2    |
| ENSMUSG00000023050 | 12555 Map3k12       |
| ENSMUSG00000026308 | 12556 Khl30         |

|                     |                     |
|---------------------|---------------------|
| ENSMUSG00000023224  | 12557 Serping1      |
| ENSMUSG00000054885  | 12558 4930578G10Rik |
| ENSMUSG00000029576  | 12559 Radil         |
| ENSMUSG00000099966  | 12560 2810402E24Rik |
| ENSMUSG00000065999  | 12561 Gm13154       |
| ENSMUSG00000032607  | 12562 Amt           |
| ENSMUSG00000054199  | 12563 Gon4l         |
| ENSMUSG00000047216  | 12564 Cdh19         |
| ENSMUSG00000029307  | 12565 Dmp1          |
| ENSMUSG00000036764  | 12566 Dnajc12       |
| ENSMUSG00000032221  | 12567 Mns1          |
| ENSMUSG00000087143  | 12568 A830082K12Rik |
| ENSMUSG000000105644 | 12569 Gm19739       |
| ENSMUSG00000059839  | 12570 Zfp874b       |
| ENSMUSG00000049871  | 12571 Nlrc3         |
| ENSMUSG00000021765  | 12572 Fst           |
| ENSMUSG00000056673  | 12573 Kdm5d         |
| ENSMUSG00000072919  | 12574 Noxred1       |
| ENSMUSG00000021047  | 12575 Nova1         |
| ENSMUSG00000001739  | 12576 Cldn15        |
| ENSMUSG00000074170  | 12577 Plekhf1       |
| ENSMUSG00000067106  | 12578 Gm5529        |
| ENSMUSG00000071671  | 12579 Gm10343       |
| ENSMUSG00000084607  | 12580 Gm22208       |
| ENSMUSG00000021250  | 12581 Fos           |
| ENSMUSG00000098181  | 12582 Rps12-ps24    |
| ENSMUSG00000050555  | 12583 Hyls1         |
| ENSMUSG00000022214  | 12584 Dcaf11        |
| ENSMUSG00000093726  | 12585 Gm20667       |
| ENSMUSG00000059854  | 12586 Hydin         |
| ENSMUSG00000040605  | 12587 Bace2         |
| ENSMUSG00000031601  | 12588 Cnot7         |
| ENSMUSG00000044216  | 12589 Kcnj4         |
| ENSMUSG00000082272  | 12590 Gm11675       |
| ENSMUSG00000046085  | 12591 4931422A03Rik |
| ENSMUSG00000036492  | 12592 Rnf39         |
| ENSMUSG00000025427  | 12593 Rnf165        |
| ENSMUSG00000037995  | 12594 Igsf9         |
| ENSMUSG00000008206  | 12595 Cers4         |
| ENSMUSG000000105852 | 12596 Gm42890       |
| ENSMUSG00000067795  | 12597 4930444P10Rik |
| ENSMUSG00000033705  | 12598 Stard9        |

|                    |                |
|--------------------|----------------|
| ENSMUSG00000068250 | 12599 Amn1     |
| ENSMUSG00000033618 | 12600 Map3k13  |
| ENSMUSG00000049287 | 12601 Iba57    |
| ENSMUSG00000041774 | 12602 Ydjc     |
| ENSMUSG00000104414 | 12603 Gm37799  |
| ENSMUSG00000052135 | 12604 Foxo6    |
| ENSMUSG00000106248 | 12605 Gm9728   |
| ENSMUSG00000097458 | 12606 Gm26697  |
| ENSMUSG00000028777 | 12607 Gnat3    |
| ENSMUSG00000083829 | 12608 Gm2199   |
| ENSMUSG00000069132 | 12609 Nxph2    |
| ENSMUSG00000033768 | 12610 Nrnx2    |
| ENSMUSG00000014602 | 12611 Kif1a    |
| ENSMUSG00000072662 | 12612 Mansc4   |
| ENSMUSG00000083907 | 12613 Plk-ps1  |
| ENSMUSG00000050954 | 12614 Zfp169   |
| ENSMUSG00000074093 | 12615 Svip     |
| ENSMUSG00000057967 | 12616 Fgf18    |
| ENSMUSG00000104904 | 12617 Gm43082  |
| ENSMUSG00000084826 | 12618 Al847159 |
| ENSMUSG00000009378 | 12619 Slc16a12 |
| ENSMUSG00000080797 | 12620 Gm15760  |
| ENSMUSG00000083407 | 12621 Gm13176  |
| ENSMUSG00000049811 | 12622 Fam161a  |
| ENSMUSG00000026986 | 12623 Hnmt     |
| ENSMUSG00000031227 | 12624 Magee1   |
| ENSMUSG00000028111 | 12625 Ctsk     |
| ENSMUSG00000043410 | 12626 Hfm1     |
| ENSMUSG00000065610 | 12627 Mir29a   |
| ENSMUSG00000095288 | 12628 Gm7618   |
| ENSMUSG00000096278 | 12629 Dcpp2    |
| ENSMUSG00000006313 | 12630 Upk1a    |
| ENSMUSG00000099498 | 12631 Gm29283  |
| ENSMUSG00000032719 | 12632 Sbspon   |
| ENSMUSG00000099492 | 12633 Gm5525   |
| ENSMUSG00000022269 | 12634 11-Mar   |
| ENSMUSG00000021773 | 12635 Comtd1   |
| ENSMUSG00000042810 | 12636 Krba1    |
| ENSMUSG00000026149 | 12637 Tm4sf20  |
| ENSMUSG00000022838 | 12638 Eaf2     |
| ENSMUSG00000053411 | 12639 Cbx7     |
| ENSMUSG00000087117 | 12640 Gm11523  |

|                      |                     |
|----------------------|---------------------|
| ENSMUSG00000025993   | 12641 Slc40a1       |
| ENSMUSG00000071604   | 12642 Fam189a2      |
| ENSMUSG00000016933   | 12643 Plcg1         |
| ENSMUSG000000083692  | 12644 Gm9575        |
| ENSMUSG000000091514  | 12645 Gm17484       |
| ENSMUSG000000032776  | 12646 Mctp2         |
| ENSMUSG000000067878  | 12647 Mtap7d3       |
| ENSMUSG000000037922  | 12648 Bank1         |
| ENSMUSG000000096361  | 12649 Gm5814        |
| ENSMUSG000000020213  | 12650 Glipr1l1      |
| ENSMUSG000000015829  | 12651 Tnr           |
| ENSMUSG000000082070  | 12652 Gm1866        |
| ENSMUSG000000037535  | 12653 1700021A07Rik |
| ENSMUSG000000007908  | 12654 Hmgcll1       |
| ENSMUSG000000030043  | 12655 Tacr1         |
| ENSMUSG0000000082177 | 12656 Gm16005       |
| ENSMUSG000000023964  | 12657 Calcr         |
| ENSMUSG000000081470  | 12658 Gm14131       |
| ENSMUSG000000030302  | 12659 Atp2b2        |
| ENSMUSG000000073627  | 12660 C130036L24Rik |
| ENSMUSG000000069189  | 12661 Zdhhc11       |
| ENSMUSG000000091277  | 12662 Gm1818        |
| ENSMUSG000000039157  | 12663 Fam102a       |
| ENSMUSG000000029333  | 12664 Rasgef1b      |
| ENSMUSG000000043614  | 12665 Vps37d        |
| ENSMUSG000000044968  | 12666 Napepld       |
| ENSMUSG000000031145  | 12667 Prickle3      |
| ENSMUSG000000030047  | 12668 Arhgap25      |
| ENSMUSG000000099908  | 12669 Gm28539       |
| ENSMUSG000000044982  | 12670 Sft2d3        |
| ENSMUSG000000029641  | 12671 Rasl11a       |
| ENSMUSG000000022562  | 12672 Oplah         |
| ENSMUSG000000040717  | 12673 Il17rd        |
| ENSMUSG000000072694  | 12674 1500011B03Rik |
| ENSMUSG000000087405  | 12675 Gm14232       |
| ENSMUSG000000020325  | 12676 Fstl3         |
| ENSMUSG0000000080115 | 12677 Mettl21b      |
| ENSMUSG000000091053  | 12678 Gm9742        |
| ENSMUSG000000031230  | 12679 Fgf16         |
| ENSMUSG000000049307  | 12680 Fut4          |
| ENSMUSG000000045693  | 12681 Nlrp4e        |
| ENSMUSG000000031637  | 12682 Lrp2bp        |

|                    |                     |
|--------------------|---------------------|
| ENSMUSG00000081684 | 12683 Rps2-ps13     |
| ENSMUSG00000032343 | 12684 Impg1         |
| ENSMUSG00000078201 | 12685 Tmem203       |
| ENSMUSG00000045694 | 12686 Gm4997        |
| ENSMUSG00000032652 | 12687 Crebl2        |
| ENSMUSG00000097623 | 12688 B230323A14Rik |
| ENSMUSG00000108137 | 12689 RP23-392K24.5 |
| ENSMUSG00000074194 | 12690 Zfp791        |
| ENSMUSG00000097519 | 12691 4930558J18Rik |
| ENSMUSG00000087249 | 12692 Gm16062       |
| ENSMUSG00000082971 | 12693 Gm13517       |
| ENSMUSG00000097840 | 12694 Gm26756       |
| ENSMUSG00000085379 | 12695 2310058D17Rik |
| ENSMUSG00000041617 | 12696 Ccdc74a       |
| ENSMUSG00000073274 | 12697 Gm14636       |
| ENSMUSG00000040328 | 12698 Olfr56        |
| ENSMUSG00000048281 | 12699 Dleu7         |
| ENSMUSG00000041671 | 12700 Pyroxd1       |
| ENSMUSG00000108071 | 12701 RP23-114F22.2 |
| ENSMUSG00000100397 | 12702 Gm28071       |
| ENSMUSG00000034758 | 12703 Tle6          |
| ENSMUSG00000081400 | 12704 Gm13680       |
| ENSMUSG00000101133 | 12705 Gm29050       |
| ENSMUSG00000097189 | 12706 Gm26594       |
| ENSMUSG00000021213 | 12707 Akr1c13       |
| ENSMUSG00000033880 | 12708 Lgals3bp      |
| ENSMUSG00000062944 | 12709 9130023H24Rik |
| ENSMUSG00000022860 | 12710 Chodl         |
| ENSMUSG00000034771 | 12711 Tle2          |
| ENSMUSG00000042165 | 12712 Gm9774        |
| ENSMUSG00000025020 | 12713 Slit1         |
| ENSMUSG00000066487 | 12714 Gm5786        |
| ENSMUSG00000059336 | 12715 Slc14a1       |
| ENSMUSG00000047090 | 12716 Tmem198b      |
| ENSMUSG00000023043 | 12717 Krt18         |
| ENSMUSG00000025432 | 12718 Avil          |
| ENSMUSG00000066724 | 12719 Gm10175       |
| ENSMUSG00000085399 | 12720 Foxd2os       |
| ENSMUSG00000028528 | 12721 Dnajc6        |
| ENSMUSG00000002346 | 12722 Slc25a42      |
| ENSMUSG00000036292 | 12723 Gramd1c       |
| ENSMUSG00000086438 | 12724 Asb17os       |

|                    |                     |
|--------------------|---------------------|
| ENSMUSG00000084169 | 12725 Gm12240       |
| ENSMUSG00000037994 | 12726 Slc9b2        |
| ENSMUSG00000030214 | 12727 Plbd1         |
| ENSMUSG00000030218 | 12728 Mgp           |
| ENSMUSG00000001988 | 12729 Npas1         |
| ENSMUSG00000070834 | 12730 Gm13015       |
| ENSMUSG00000047370 | 12731 Gm7367        |
| ENSMUSG00000043881 | 12732 Kbtbd7        |
| ENSMUSG00000025489 | 12733 Ifitm5        |
| ENSMUSG00000092381 | 12734 Gm20512       |
| ENSMUSG00000106416 | 12735 Gm5857        |
| ENSMUSG00000106227 | 12736 Gm43464       |
| ENSMUSG00000100703 | 12737 Gm28358       |
| ENSMUSG00000017868 | 12738 Sgk2          |
| ENSMUSG00000047759 | 12739 Hs3st3a1      |
| ENSMUSG00000086467 | 12740 4930571N24Rik |
| ENSMUSG00000053093 | 12741 Myh7          |
| ENSMUSG00000028497 | 12742 Hacd4         |
| ENSMUSG00000101581 | 12743 C430002N11Rik |
| ENSMUSG00000098050 | 12744 Gm5345        |
| ENSMUSG00000032179 | 12745 Bmp5          |
| ENSMUSG00000078963 | 12746 Hsbp1l1       |
| ENSMUSG00000034910 | 12747 Pygo1         |
| ENSMUSG00000000365 | 12748 Rnf17         |
| ENSMUSG00000016493 | 12749 Cd46          |
| ENSMUSG00000058153 | 12750 Sez6l         |
| ENSMUSG00000021313 | 12751 Ryr2          |
| ENSMUSG00000073415 | 12752 Gm10501       |
| ENSMUSG00000043008 | 12753 Klhl6         |
| ENSMUSG00000100104 | 12754 Gm5644        |
| ENSMUSG00000097187 | 12755 Gm19426       |
| ENSMUSG00000070336 | 12756 Fbxo47        |
| ENSMUSG00000082373 | 12757 Gm13754       |
| ENSMUSG00000094090 | 12758 Gm8494        |
| ENSMUSG00000001249 | 12759 Hpn           |
| ENSMUSG00000078786 | 12760 BC024978      |
| ENSMUSG00000053004 | 12761 Hrh1          |
| ENSMUSG00000078877 | 12762 Gm14295       |
| ENSMUSG00000031995 | 12763 St14          |
| ENSMUSG00000000876 | 12764 Pxmp4         |
| ENSMUSG00000033192 | 12765 Lpcat2        |
| ENSMUSG00000098198 | 12766 Gm9169        |



|                     |                      |
|---------------------|----------------------|
| ENSMUSG00000031104  | 12767 Rab33a         |
| ENSMUSG00000023913  | 12768 Pla2g7         |
| ENSMUSG00000049916  | 12769 2610318N02Rik  |
| ENSMUSG00000022249  | 12770 Ttc23l         |
| ENSMUSG00000025529  | 12771 Zfp711         |
| ENSMUSG00000004110  | 12772 Cacna1e        |
| ENSMUSG00000063586  | 12773 Gm5513         |
| ENSMUSG00000086807  | 12774 Platr21        |
| ENSMUSG00000073988  | 12775 Ttpa           |
| ENSMUSG000000103691 | 12776 Gm38019        |
| ENSMUSG00000098781  | 12777 Gm28044        |
| ENSMUSG00000053367  | 12778 Gm6792         |
| ENSMUSG00000008153  | 12779 Clstn3         |
| ENSMUSG00000086013  | 12780 Gm15706        |
| ENSMUSG00000020120  | 12781 Plek           |
| ENSMUSG00000068200  | 12782 Gm5931         |
| ENSMUSG00000097690  | 12783 4930505N22Rik  |
| ENSMUSG00000057969  | 12784 Sema3b         |
| ENSMUSG000000106419 | 12785 Gm5550         |
| ENSMUSG00000019767  | 12786 Ccdc170        |
| ENSMUSG00000035373  | 12787 Ccl7           |
| ENSMUSG00000050471  | 12788 Fam118b        |
| ENSMUSG00000097213  | 12789 Gm26745        |
| ENSMUSG00000031828  | 12790 Khlh36         |
| ENSMUSG00000021758  | 12791 Ddx4           |
| ENSMUSG00000029228  | 12792 Lnx1           |
| ENSMUSG00000021696  | 12793 Elov17         |
| ENSMUSG00000081661  | 12794 Gm14450        |
| ENSMUSG00000021135  | 12795 Slc10a1        |
| ENSMUSG00000025014  | 12796 Dntt           |
| ENSMUSG00000022840  | 12797 Adcy5          |
| ENSMUSG00000032679  | 12798 Cd59a          |
| ENSMUSG00000085433  | 12799 Gm16001        |
| ENSMUSG00000043924  | 12800 Ncmap          |
| ENSMUSG00000082099  | 12801 Gm12013        |
| ENSMUSG00000026649  | 12802 Cfap126        |
| ENSMUSG000000108320 | 12803 RP23-179K11.10 |
| ENSMUSG00000035868  | 12804 3110052M02Rik  |
| ENSMUSG00000018909  | 12805 Arrb1          |
| ENSMUSG00000032890  | 12806 Rims3          |
| ENSMUSG000000100033 | 12807 Gm8337         |
| ENSMUSG00000085627  | 12808 Gm11222        |

|                     |                     |
|---------------------|---------------------|
| ENSMUSG00000025723  | 12809 Nmb           |
| ENSMUSG00000027955  | 12810 Fam198b       |
| ENSMUSG00000027580  | 12811 Helz2         |
| ENSMUSG00000087017  | 12812 4930417H01Rik |
| ENSMUSG00000084099  | 12813 Gm12929       |
| ENSMUSG00000097007  | 12814 4930432B10Rik |
| ENSMUSG00000043460  | 12815 Elfn2         |
| ENSMUSG00000092837  | 12816 Rpph1         |
| ENSMUSG00000075070  | 12817 4932412D23Rik |
| ENSMUSG00000086427  | 12818 Hoxa11os      |
| ENSMUSG00000045201  | 12819 Lrrc3b        |
| ENSMUSG00000062785  | 12820 Kcnc3         |
| ENSMUSG00000042476  | 12821 Abcb4         |
| ENSMUSG00000033313  | 12822 Fbxl8         |
| ENSMUSG00000049972  | 12823 Skint9        |
| ENSMUSG00000024481  | 12824 Lvrn          |
| ENSMUSG00000084164  | 12825 Gm13902       |
| ENSMUSG00000044749  | 12826 Abca6         |
| ENSMUSG00000063821  | 12827 Dupd1         |
| ENSMUSG00000039116  | 12828 Adgrg6        |
| ENSMUSG00000032135  | 12829 Mcam          |
| ENSMUSG00000057899  | 12830 Adgrf2        |
| ENSMUSG00000028794  | 12831 A3galt2       |
| ENSMUSG00000005958  | 12832 Ephb3         |
| ENSMUSG00000029570  | 12833 Lfng          |
| ENSMUSG00000075389  | 12834 2810410L24Rik |
| ENSMUSG00000059146  | 12835 Ntrk3         |
| ENSMUSG00000045730  | 12836 Adrb2         |
| ENSMUSG00000032322  | 12837 Pstpip1       |
| ENSMUSG00000083860  | 12838 Gm13313       |
| ENSMUSG00000074780  | 12839 Anapc15-ps    |
| ENSMUSG00000033147  | 12840 Slc22a15      |
| ENSMUSG00000044807  | 12841 Zfp354c       |
| ENSMUSG000000100680 | 12842 1810044D09Rik |
| ENSMUSG00000090173  | 12843 Fbxw10        |
| ENSMUSG00000081673  | 12844 Gm14794       |
| ENSMUSG00000033170  | 12845 Card10        |
| ENSMUSG00000097703  | 12846 Gm26623       |
| ENSMUSG00000049537  | 12847 Tecrl         |
| ENSMUSG00000028064  | 12848 Sema4a        |
| ENSMUSG00000040747  | 12849 Cd53          |
| ENSMUSG00000054474  | 12850 Thnsl2        |

|                      |                      |
|----------------------|----------------------|
| ENSMUSG00000000948   | 12851 Gm38393        |
| ENSMUSG00000100164   | 12852 2610306M01Rik  |
| ENSMUSG00000031391   | 12853 L1cam          |
| ENSMUSG000000059830  | 12854 Gm16380        |
| ENSMUSG00000000594   | 12855 Gm2a           |
| ENSMUSG00000027223   | 12856 Mapk8ip1       |
| ENSMUSG000000050270  | 12857 Tmem220        |
| ENSMUSG000000005540  | 12858 Fcer2a         |
| ENSMUSG000000085221  | 12859 Gm11309        |
| ENSMUSG000000083816  | 12860 Gm13033        |
| ENSMUSG000000032109  | 12861 Nlr1           |
| ENSMUSG000000082662  | 12862 Gm15516        |
| ENSMUSG000000005493  | 12863 Msh4           |
| ENSMUSG000000091415  | 12864 Ak9            |
| ENSMUSG000000019880  | 12865 Rspo3          |
| ENSMUSG000000038884  | 12866 A230050P20Rik  |
| ENSMUSG000000042607  | 12867 Asb4           |
| ENSMUSG000000089695  | 12868 Gm15946        |
| ENSMUSG000000070822  | 12869 Zscan18        |
| ENSMUSG000000033644  | 12870 Piwil2         |
| ENSMUSG000000006782  | 12871 Cnp            |
| ENSMUSG000000028773  | 12872 Fabp3          |
| ENSMUSG000000083101  | 12873 Gm13430        |
| ENSMUSG000000019982  | 12874 Myb            |
| ENSMUSG000000066647  | 12875 Gm5113         |
| ENSMUSG0000000103921 | 12876 Gm5841         |
| ENSMUSG0000000107838 | 12877 RP24-470M22.10 |
| ENSMUSG000000039851  | 12878 4932438H23Rik  |
| ENSMUSG000000097141  | 12879 Gm10524        |
| ENSMUSG000000021624  | 12880 Cd180          |
| ENSMUSG000000087433  | 12881 Gm14167        |
| ENSMUSG000000024227  | 12882 Pdzph1         |
| ENSMUSG000000056752  | 12883 Dnah9          |
| ENSMUSG000000031425  | 12884 Plp1           |
| ENSMUSG000000055745  | 12885 Ldoc1l         |
| ENSMUSG000000018166  | 12886 Erbb3          |
| ENSMUSG000000075184  | 12887 F930017D23Rik  |
| ENSMUSG000000027840  | 12888 Wnt2b          |
| ENSMUSG000000043342  | 12889 Hoxd9          |
| ENSMUSG000000004267  | 12890 Eno2           |
| ENSMUSG000000082820  | 12891 Gm13803        |
| ENSMUSG000000044788  | 12892 Fads6          |

|                     |                     |
|---------------------|---------------------|
| ENSMUSG00000082308  | 12893 Gm15770       |
| ENSMUSG00000044952  | 12894 Kctd21        |
| ENSMUSG00000079022  | 12895 Col22a1       |
| ENSMUSG00000001741  | 12896 Il16          |
| ENSMUSG00000042073  | 12897 Abhd14b       |
| ENSMUSG00000009108  | 12898 Gnat2         |
| ENSMUSG00000038524  | 12899 Fchsd1        |
| ENSMUSG00000061272  | 12900 Gm14173       |
| ENSMUSG00000087543  | 12901 Gm16576       |
| ENSMUSG00000030769  | 12902 Slc5a11       |
| ENSMUSG00000000290  | 12903 Itgb2         |
| ENSMUSG00000086342  | 12904 Gm12932       |
| ENSMUSG000000103499 | 12905 Gm6558        |
| ENSMUSG00000026156  | 12906 B3gat2        |
| ENSMUSG00000050973  | 12907 Gdpgp1        |
| ENSMUSG00000017412  | 12908 Cacnb4        |
| ENSMUSG00000056904  | 12909 Gm5620        |
| ENSMUSG00000070866  | 12910 Zfp804a       |
| ENSMUSG00000024065  | 12911 Ehd3          |
| ENSMUSG00000060680  | 12912 Gm8894        |
| ENSMUSG00000026587  | 12913 Astn1         |
| ENSMUSG00000024105  | 12914 Themis3       |
| ENSMUSG00000025494  | 12915 Sigirr        |
| ENSMUSG00000097120  | 12916 Gm26887       |
| ENSMUSG00000020387  | 12917 Jade2         |
| ENSMUSG00000040289  | 12918 Hey1          |
| ENSMUSG00000091742  | 12919 Gm5093        |
| ENSMUSG00000085761  | 12920 4930455G09Rik |
| ENSMUSG00000059159  | 12921 Gm8129        |
| ENSMUSG00000001334  | 12922 Fndc5         |
| ENSMUSG00000056031  | 12923 9330154J02Rik |
| ENSMUSG00000087004  | 12924 Gm14154       |
| ENSMUSG00000030882  | 12925 Dnhd1         |
| ENSMUSG00000049036  | 12926 Tmem121       |
| ENSMUSG00000022096  | 12927 Hr            |
| ENSMUSG00000085042  | 12928 Abhd11os      |
| ENSMUSG00000051506  | 12929 Wdfy4         |
| ENSMUSG00000095620  | 12930 2010005H15Rik |
| ENSMUSG00000047911  | 12931 Npm2          |
| ENSMUSG00000069633  | 12932 Pex11g        |
| ENSMUSG00000090192  | 12933 Gm16556       |
| ENSMUSG00000033578  | 12934 Tmem35        |

|                    |                     |
|--------------------|---------------------|
| ENSMUSG00000105727 | 12935 Gm8828        |
| ENSMUSG00000043782 | 12936 Ccdc64b       |
| ENSMUSG00000106997 | 12937 RP23-26P10.2  |
| ENSMUSG00000087187 | 12938 Gm13431       |
| ENSMUSG00000068324 | 12939 Gm10029       |
| ENSMUSG00000029086 | 12940 Prom1         |
| ENSMUSG00000105706 | 12941 Gm42855       |
| ENSMUSG00000033316 | 12942 Galnt9        |
| ENSMUSG00000058050 | 12943 Gm9234        |
| ENSMUSG00000055188 | 12944 Rbm3os        |
| ENSMUSG00000044748 | 12945 Defb1         |
| ENSMUSG00000043243 | 12946 Fam129c       |
| ENSMUSG00000082305 | 12947 Gm2420        |
| ENSMUSG00000005980 | 12948 Dnase1        |
| ENSMUSG00000030083 | 12949 Abtb1         |
| ENSMUSG00000024786 | 12950 1700123I01Rik |
| ENSMUSG00000034435 | 12951 Tmem30b       |
| ENSMUSG00000103847 | 12952 Gm20056       |
| ENSMUSG00000031026 | 12953 Trim66        |
| ENSMUSG00000004668 | 12954 Abca13        |
| ENSMUSG00000044562 | 12955 Rasip1        |
| ENSMUSG00000085654 | 12956 Gm12536       |
| ENSMUSG00000021097 | 12957 Clmn          |
| ENSMUSG00000025916 | 12958 Ppp1r42       |
| ENSMUSG00000034116 | 12959 Vav1          |
| ENSMUSG00000097068 | 12960 Gm26760       |
| ENSMUSG00000066772 | 12961 Obox3         |
| ENSMUSG00000001518 | 12962 Itfg2         |
| ENSMUSG00000023017 | 12963 Asic1         |
| ENSMUSG00000019852 | 12964 Arfgef3       |
| ENSMUSG00000086604 | 12965 Gm15510       |
| ENSMUSG00000097303 | 12966 3110083C13Rik |
| ENSMUSG00000096726 | 12967 Gm5558        |
| ENSMUSG00000054196 | 12968 Cthrc1        |
| ENSMUSG00000051355 | 12969 Commd1        |
| ENSMUSG00000069196 | 12970 Gm10161       |
| ENSMUSG00000102915 | 12971 Gm32460       |
| ENSMUSG00000023883 | 12972 Phf10         |
| ENSMUSG00000025176 | 12973 Hoga1         |
| ENSMUSG00000020284 | 12974 1810043G02Rik |
| ENSMUSG00000053198 | 12975 Prx           |
| ENSMUSG00000103711 | 12976 Tstd1         |

|                    |                     |
|--------------------|---------------------|
| ENSMUSG00000083767 | 12977 Gm11405       |
| ENSMUSG00000095325 | 12978 Zfp870        |
| ENSMUSG00000085562 | 12979 2610028E06Rik |
| ENSMUSG00000029456 | 12980 Acad10        |
| ENSMUSG00000027452 | 12981 Acss1         |
| ENSMUSG00000022906 | 12982 Parp9         |
| ENSMUSG00000097304 | 12983 Rpl31-ps15    |
| ENSMUSG00000071661 | 12984 Zbtb3         |
| ENSMUSG00000069899 | 12985 Gm12166       |
| ENSMUSG00000047139 | 12986 Cd24a         |
| ENSMUSG00000107853 | 12987 RP24-409C18.1 |
| ENSMUSG00000097520 | 12988 Gm26843       |
| ENSMUSG00000097467 | 12989 Gm26737       |
| ENSMUSG00000031351 | 12990 Zfp185        |
| ENSMUSG00000105081 | 12991 Gm43110       |
| ENSMUSG00000044313 | 12992 Mab21l3       |
| ENSMUSG00000093979 | 12993 Gm2237        |
| ENSMUSG00000024827 | 12994 Gldc          |
| ENSMUSG00000071392 | 12995 Ect2l         |
| ENSMUSG00000038068 | 12996 Rnf144b       |
| ENSMUSG00000059003 | 12997 Grin2a        |
| ENSMUSG00000092570 | 12998 2210019I11Rik |
| ENSMUSG00000087306 | 12999 A230004M16Rik |
| ENSMUSG00000029819 | 13000 Npy           |
| ENSMUSG00000043557 | 13001 Mdga1         |
| ENSMUSG00000005674 | 13002 Tomm40l       |
| ENSMUSG00000014791 | 13003 Elmo3         |
| ENSMUSG00000035121 | 13004 Neil2         |
| ENSMUSG00000097835 | 13005 Gm26910       |
| ENSMUSG00000030031 | 13006 Kbtbd8        |
| ENSMUSG00000054252 | 13007 Fgfr3         |
| ENSMUSG00000072437 | 13008 Nanos1        |
| ENSMUSG00000101337 | 13009 Dnah7c        |
| ENSMUSG00000075410 | 13010 Gm11744       |
| ENSMUSG00000034833 | 13011 Tespa1        |
| ENSMUSG00000037735 | 13012 2810032G03Rik |
| ENSMUSG00000057215 | 13013 Platr28       |
| ENSMUSG00000040576 | 13014 Wbscr28       |
| ENSMUSG00000068373 | 13015 D430041D05Rik |
| ENSMUSG00000054690 | 13016 Emcn          |
| ENSMUSG00000029648 | 13017 Flt1          |
| ENSMUSG00000028919 | 13018 Arhgef19      |

|                    |                     |
|--------------------|---------------------|
| ENSMUSG00000026315 | 13019 Serpinb8      |
| ENSMUSG00000107879 | 13020 RP24-363O21.3 |
| ENSMUSG00000050074 | 13021 Spink8        |
| ENSMUSG00000084241 | 13022 Gm13416       |
| ENSMUSG00000042686 | 13023 Jph1          |
| ENSMUSG00000099418 | 13024 Gm6657        |
| ENSMUSG00000078994 | 13025 Zfp429        |
| ENSMUSG00000092056 | 13026 Gm7289        |
| ENSMUSG00000049288 | 13027 Lix1l         |
| ENSMUSG00000034009 | 13028 Rxfp1         |
| ENSMUSG00000078954 | 13029 Arhgap8       |
| ENSMUSG00000059742 | 13030 Kcnh7         |
| ENSMUSG00000028167 | 13031 Bdh2          |
| ENSMUSG00000031488 | 13032 Rab11fip1     |
| ENSMUSG00000070942 | 13033 Il1rl2        |
| ENSMUSG00000107192 | 13034 Gm19583       |
| ENSMUSG00000090164 | 13035 BC035044      |
| ENSMUSG00000078580 | 13036 E430018J23Rik |
| ENSMUSG00000036882 | 13037 Arhgap33      |
| ENSMUSG00000108652 | 13038 RP23-53N23.3  |
| ENSMUSG00000026331 | 13039 Slco6c1       |
| ENSMUSG00000050896 | 13040 Rtn4rl2       |
| ENSMUSG00000106836 | 13041 Gm43578       |
| ENSMUSG00000093545 | 13042 Gm5871        |
| ENSMUSG00000027947 | 13043 Il6ra         |
| ENSMUSG00000035273 | 13044 Hpse          |
| ENSMUSG00000097747 | 13045 Gm26534       |
| ENSMUSG00000020434 | 13046 4921536K21Rik |
| ENSMUSG00000083668 | 13047 Gm5648        |
| ENSMUSG00000105324 | 13048 Gm42705       |
| ENSMUSG00000078932 | 13049 CN725425      |
| ENSMUSG00000033615 | 13050 Cplx1         |
| ENSMUSG00000052414 | 13051 Gm28047       |
| ENSMUSG00000029551 | 13052 Psmg3         |
| ENSMUSG00000074001 | 13053 Klhl40        |
| ENSMUSG00000041245 | 13054 Wnk3          |
| ENSMUSG00000022194 | 13055 Pabpn1        |
| ENSMUSG00000096828 | 13056 Gm3618        |
| ENSMUSG00000062846 | 13057 Gm14176       |
| ENSMUSG00000021908 | 13058 Gm6768        |
| ENSMUSG00000035285 | 13059 Nat14         |
| ENSMUSG00000080844 | 13060 Gm14107       |

|                    |                     |
|--------------------|---------------------|
| ENSMUSG00000051736 | 13061 Fam229b       |
| ENSMUSG00000106094 | 13062 Gm18916       |
| ENSMUSG00000068226 | 13063 Gm6723        |
| ENSMUSG00000015957 | 13064 Wnt11         |
| ENSMUSG00000030088 | 13065 Aldh1l1       |
| ENSMUSG00000023802 | 13066 Nox3          |
| ENSMUSG00000106692 | 13067 Gm43299       |
| ENSMUSG00000034063 | 13068 4930590J08Rik |
| ENSMUSG00000068463 | 13069 B630019A10Rik |
| ENSMUSG00000031538 | 13070 Plat          |
| ENSMUSG00000028572 | 13071 Hook1         |
| ENSMUSG00000016206 | 13072 H2-M3         |
| ENSMUSG00000029699 | 13073 Ssc4d         |
| ENSMUSG00000046879 | 13074 Irgm1         |
| ENSMUSG00000029204 | 13075 Rhoh          |
| ENSMUSG00000041872 | 13076 Il17f         |
| ENSMUSG00000017943 | 13077 Gdap1l1       |
| ENSMUSG00000107432 | 13078 RP23-82I13.8  |
| ENSMUSG00000061390 | 13079 Gm7866        |
| ENSMUSG00000104923 | 13080 Gm5865        |
| ENSMUSG00000087193 | 13081 Gm14820       |
| ENSMUSG00000027500 | 13082 Stmn2         |
| ENSMUSG00000052595 | 13083 A1cf          |
| ENSMUSG00000037106 | 13084 Fer1l6        |
| ENSMUSG00000086748 | 13085 Gm13261       |
| ENSMUSG00000092412 | 13086 Gm20507       |
| ENSMUSG00000066975 | 13087 Cryba4        |
| ENSMUSG00000027919 | 13088 Lce1g         |
| ENSMUSG00000001930 | 13089 Vwf           |
| ENSMUSG00000009614 | 13090 Sardh         |
| ENSMUSG00000041117 | 13091 Ccdc8         |
| ENSMUSG00000097125 | 13092 Gm26885       |
| ENSMUSG00000071112 | 13093 Spx           |
| ENSMUSG00000055313 | 13094 Pgbd1         |
| ENSMUSG00000082896 | 13095 Gm5844        |
| ENSMUSG00000085375 | 13096 Gm12506       |
| ENSMUSG00000026322 | 13097 Htr4          |
| ENSMUSG00000050243 | 13098 Gm5446        |
| ENSMUSG00000027048 | 13099 Abcb11        |
| ENSMUSG00000083218 | 13100 Gm16425       |
| ENSMUSG00000020481 | 13101 Ankrd36       |
| ENSMUSG00000079644 | 13102 Gm1110        |



|                    |                     |
|--------------------|---------------------|
| ENSMUSG00000037904 | 13103 Ankrd9        |
| ENSMUSG00000082246 | 13104 Gm13047       |
| ENSMUSG00000101009 | 13105 1700108F19Rik |
| ENSMUSG00000030306 | 13106 Tmtc1         |
| ENSMUSG00000066771 | 13107 Gm5614        |
| ENSMUSG00000074111 | 13108 Mrgpra9       |
| ENSMUSG00000022546 | 13109 Gpt           |
| ENSMUSG00000070369 | 13110 Itgad         |
| ENSMUSG00000001655 | 13111 Hoxc13        |
| ENSMUSG00000042589 | 13112 Cux2          |
| ENSMUSG00000038233 | 13113 Fam198a       |
| ENSMUSG00000024295 | 13114 Cyp4f41-ps    |
| ENSMUSG00000001420 | 13115 Tmem79        |
| ENSMUSG00000035640 | 13116 Cbarp         |
| ENSMUSG00000096001 | 13117 2610528A11Rik |
| ENSMUSG00000030701 | 13118 Plekha1       |
| ENSMUSG00000085395 | 13119 Gm13056       |
| ENSMUSG00000005043 | 13120 Sgsh          |
| ENSMUSG00000107681 | 13121 RP23-121E15.5 |
| ENSMUSG00000000392 | 13122 Fap           |
| ENSMUSG00000087519 | 13123 AV039307      |
| ENSMUSG00000031163 | 13124 Glod5         |
| ENSMUSG00000030307 | 13125 Slc6a11       |
| ENSMUSG00000049588 | 13126 Ccdc69        |
| ENSMUSG00000053626 | 13127 Tll1          |
| ENSMUSG00000028189 | 13128 Ctbs          |
| ENSMUSG00000081648 | 13129 Gm13423       |
| ENSMUSG00000073293 | 13130 Nudt10        |
| ENSMUSG00000040896 | 13131 Kcnd3         |
| ENSMUSG00000044056 | 13132 Efcab9        |
| ENSMUSG00000020083 | 13133 2010107G23Rik |
| ENSMUSG00000027750 | 13134 Postn         |
| ENSMUSG00000049897 | 13135 Stkld1        |
| ENSMUSG00000071722 | 13136 Spin4         |
| ENSMUSG00000067924 | 13137 Cxx1b         |
| ENSMUSG00000066592 | 13138 Gm7589        |
| ENSMUSG00000094257 | 13139 Ap3s1-ps2     |
| ENSMUSG00000097673 | 13140 Gm26608       |
| ENSMUSG00000038782 | 13141 1700028J19Rik |
| ENSMUSG00000097806 | 13142 Gm6556        |
| ENSMUSG00000102909 | 13143 Gm2453        |
| ENSMUSG00000108615 | 13144 RP23-136A14.1 |

|                     |                     |
|---------------------|---------------------|
| ENSMUSG00000022304  | 13145 Dpys          |
| ENSMUSG00000034059  | 13146 Ypel4         |
| ENSMUSG00000032278  | 13147 Paqr5         |
| ENSMUSG00000040121  | 13148 Rep15         |
| ENSMUSG00000087982  | 13149 Gm22224       |
| ENSMUSG00000034854  | 13150 Mfsd12        |
| ENSMUSG00000022297  | 13151 Fzd6          |
| ENSMUSG00000058773  | 13152 Hist1h1b      |
| ENSMUSG00000036502  | 13153 Tmem255a      |
| ENSMUSG00000081703  | 13154 Gm6285        |
| ENSMUSG00000024810  | 13155 Il33          |
| ENSMUSG00000074259  | 13156 Gramd2        |
| ENSMUSG000000105163 | 13157 Gm4873        |
| ENSMUSG00000028128  | 13158 F3            |
| ENSMUSG00000033318  | 13159 Gstt2         |
| ENSMUSG00000040966  | 13160 Slc22a2       |
| ENSMUSG000000106396 | 13161 Gm42902       |
| ENSMUSG00000036030  | 13162 Prtg          |
| ENSMUSG00000083674  | 13163 Zfp133-ps     |
| ENSMUSG00000038209  | 13164 Itln1         |
| ENSMUSG00000056476  | 13165 Med12l        |
| ENSMUSG00000036962  | 13166 Cfp221        |
| ENSMUSG00000073600  | 13167 Prob1         |
| ENSMUSG00000044768  | 13168 D1Ertd622e    |
| ENSMUSG00000024965  | 13169 Fermt3        |
| ENSMUSG00000057842  | 13170 Zfp595        |
| ENSMUSG00000071497  | 13171 Nutf2-ps1     |
| ENSMUSG00000073067  | 13172 9130019P16Rik |
| ENSMUSG00000027845  | 13173 Dclre1b       |
| ENSMUSG000000101589 | 13174 Rbm6-ps1      |
| ENSMUSG00000037166  | 13175 Ppp1r14a      |
| ENSMUSG00000024084  | 13176 Qpct          |
| ENSMUSG00000084403  | 13177 Rps15a-ps8    |
| ENSMUSG00000038600  | 13178 Atp6v0a4      |
| ENSMUSG00000038146  | 13179 Notch3        |
| ENSMUSG00000087484  | 13180 2900089D17Rik |
| ENSMUSG00000066629  | 13181 Rpl36-ps3     |
| ENSMUSG00000085653  | 13182 Gm15179       |
| ENSMUSG000000107482 | 13183 RP23-74K24.2  |
| ENSMUSG00000078700  | 13184 D030028A08Rik |
| ENSMUSG00000037887  | 13185 Dusp8         |
| ENSMUSG00000059970  | 13186 Hspa2         |

|                     |                     |
|---------------------|---------------------|
| ENSMUSG00000019892  | 13187 Lrriq1        |
| ENSMUSG00000061322  | 13188 Dnaic1        |
| ENSMUSG00000048603  | 13189 Gm9828        |
| ENSMUSG00000070282  | 13190 3000002C10Rik |
| ENSMUSG00000083599  | 13191 Gm12821       |
| ENSMUSG00000091475  | 13192 2810468N07Rik |
| ENSMUSG00000091105  | 13193 Mrto4-ps2     |
| ENSMUSG00000029236  | 13194 Nmu           |
| ENSMUSG00000035829  | 13195 Ppp1r26       |
| ENSMUSG00000034245  | 13196 Hdac11        |
| ENSMUSG00000031552  | 13197 Adam18        |
| ENSMUSG00000039774  | 13198 Galnt12       |
| ENSMUSG00000037703  | 13199 Lzts3         |
| ENSMUSG00000049551  | 13200 Fzd9          |
| ENSMUSG00000085253  | 13201 Gm16833       |
| ENSMUSG00000001119  | 13202 Col6a1        |
| ENSMUSG00000030966  | 13203 Trim21        |
| ENSMUSG00000072487  | 13204 Mroh5         |
| ENSMUSG00000036904  | 13205 Fzd8          |
| ENSMUSG00000093880  | 13206 Tmem181c-ps   |
| ENSMUSG00000048827  | 13207 Pkd1l3        |
| ENSMUSG00000021127  | 13208 Zfp36l1       |
| ENSMUSG00000031216  | 13209 Stard8        |
| ENSMUSG00000082179  | 13210 Gm11407       |
| ENSMUSG00000090115  | 13211 Usp49         |
| ENSMUSG00000042010  | 13212 Acacb         |
| ENSMUSG00000053964  | 13213 Lgals4        |
| ENSMUSG00000048574  | 13214 Gm5593        |
| ENSMUSG00000089991  | 13215 Gm16332       |
| ENSMUSG00000074783  | 13216 AU019990      |
| ENSMUSG00000042854  | 13217 Trp53rkb      |
| ENSMUSG00000030670  | 13218 Cyp2r1        |
| ENSMUSG00000067158  | 13219 Col4a4        |
| ENSMUSG000000104843 | 13220 Gm5308        |
| ENSMUSG00000024749  | 13221 Tmc1          |
| ENSMUSG00000085162  | 13222 Gm12295       |
| ENSMUSG000000106241 | 13223 Gm43143       |
| ENSMUSG00000040812  | 13224 Agbl2         |
| ENSMUSG00000086596  | 13225 Susd5         |
| ENSMUSG00000057396  | 13226 Zfp759        |
| ENSMUSG00000034467  | 13227 Dynlrb2       |
| ENSMUSG00000072769  | 13228 Gm10419       |

|                    |                     |
|--------------------|---------------------|
| ENSMUSG00000074034 | 13229 Gm5921        |
| ENSMUSG00000044566 | 13230 Cage1         |
| ENSMUSG00000078620 | 13231 Gm10964       |
| ENSMUSG00000087385 | 13232 AA415398      |
| ENSMUSG00000029380 | 13233 Cxcl1         |
| ENSMUSG00000079699 | 13234 Gm6592        |
| ENSMUSG00000046312 | 13235 Al464131      |
| ENSMUSG00000096140 | 13236 Ankrd66       |
| ENSMUSG00000051606 | 13237 2010001K21Rik |
| ENSMUSG00000003657 | 13238 Calb2         |
| ENSMUSG00000046550 | 13239 Spin2c        |
| ENSMUSG00000042596 | 13240 Tfap2d        |
| ENSMUSG00000046658 | 13241 Zfp316        |
| ENSMUSG00000055150 | 13242 Zfp78         |
| ENSMUSG00000079853 | 13243 Klra1         |
| ENSMUSG00000081239 | 13244 Gm11836       |
| ENSMUSG00000034112 | 13245 Atp2c2        |
| ENSMUSG00000072955 | 13246 Tmsb15l       |
| ENSMUSG00000023064 | 13247 Sncg          |
| ENSMUSG00000062611 | 13248 Rps3a2        |
| ENSMUSG00000097998 | 13249 Gm27019       |
| ENSMUSG00000063830 | 13250 Gm6065        |
| ENSMUSG00000028392 | 13251 Bspry         |
| ENSMUSG00000107349 | 13252 Gm6655        |
| ENSMUSG00000093485 | 13253 Gm20708       |
| ENSMUSG00000025475 | 13254 Adgra1        |
| ENSMUSG00000081875 | 13255 Gm15223       |
| ENSMUSG00000024330 | 13256 Col11a2       |
| ENSMUSG00000062275 | 13257 Fbxw24        |
| ENSMUSG00000062458 | 13258 Gm8623        |
| ENSMUSG00000086952 | 13259 Gm12596       |
| ENSMUSG00000092300 | 13260 Cdk3-ps       |
| ENSMUSG00000085929 | 13261 Gm13421       |
| ENSMUSG00000034660 | 13262 Galp          |
| ENSMUSG00000097601 | 13263 Gm26660       |
| ENSMUSG00000097579 | 13264 Gm26799       |
| ENSMUSG00000011008 | 13265 Mcoln2        |
| ENSMUSG00000080779 | 13266 Gm8731        |
| ENSMUSG00000106383 | 13267 E330034L11Rik |
| ENSMUSG00000096993 | 13268 Gm26787       |
| ENSMUSG00000024209 | 13269 1700061G19Rik |
| ENSMUSG00000048582 | 13270 Gja3          |

|                    |                     |
|--------------------|---------------------|
| ENSMUSG00000107591 | 13271 RP23-252F4.4  |
| ENSMUSG00000070858 | 13272 Gm1673        |
| ENSMUSG00000069439 | 13273 Gm8444        |
| ENSMUSG00000052364 | 13274 B630019K06Rik |
| ENSMUSG00000038879 | 13275 Nipal2        |
| ENSMUSG00000084328 | 13276 Gm14046       |
| ENSMUSG00000032062 | 13277 2310030G06Rik |
| ENSMUSG00000075028 | 13278 Prdm11        |
| ENSMUSG00000069835 | 13279 Sat2          |
| ENSMUSG00000097322 | 13280 A530083I20Rik |
| ENSMUSG00000097353 | 13281 A430046D13Rik |
| ENSMUSG00000042388 | 13282 Dlgap3        |
| ENSMUSG00000068923 | 13283 Syt11         |
| ENSMUSG00000088789 | 13284 Scarna13      |
| ENSMUSG00000034947 | 13285 Tmem106a      |
| ENSMUSG00000101372 | 13286 Gm19028       |
| ENSMUSG00000044468 | 13287 Fam46c        |
| ENSMUSG00000037001 | 13288 Zfp39         |
| ENSMUSG00000027536 | 13289 Chmp4c        |
| ENSMUSG00000030854 | 13290 Ptpn5         |
| ENSMUSG00000040429 | 13291 Mterf1a       |
| ENSMUSG00000033355 | 13292 Rtp4          |
| ENSMUSG00000097523 | 13293 1700022N22Rik |
| ENSMUSG00000070461 | 13294 9230112E08Rik |
| ENSMUSG00000053499 | 13295 Gm5444        |
| ENSMUSG00000080743 | 13296 Gm7150        |
| ENSMUSG00000108738 | 13297 RP23-335G1.1  |
| ENSMUSG00000038777 | 13298 Sema6c        |
| ENSMUSG00000074657 | 13299 Kif5a         |
| ENSMUSG00000101496 | 13300 Gm8885        |
| ENSMUSG00000096617 | 13301 Gm5559        |
| ENSMUSG00000050994 | 13302 Adgb          |
| ENSMUSG00000088088 | 13303 Rmrp          |
| ENSMUSG00000087549 | 13304 Gm13427       |
| ENSMUSG00000085464 | 13305 Gm16208       |
| ENSMUSG00000072915 | 13306 Gm12258       |
| ENSMUSG00000028457 | 13307 Atp8b5        |
| ENSMUSG00000060639 | 13308 Hist1h4i      |
| ENSMUSG00000097167 | 13309 Gm16740       |
| ENSMUSG00000043333 | 13310 Rhbdl2        |
| ENSMUSG00000061371 | 13311 Zfp873        |
| ENSMUSG00000046961 | 13312 Gpr156        |

|                    |                     |
|--------------------|---------------------|
| ENSMUSG00000100334 | 13313 C230024C17Rik |
| ENSMUSG00000035713 | 13314 Usp35         |
| ENSMUSG00000094763 | 13315 Gm1647        |
| ENSMUSG00000039563 | 13316 2210406O10Rik |
| ENSMUSG00000064310 | 13317 Zpld1         |
| ENSMUSG00000061740 | 13318 Cyp2d22       |
| ENSMUSG00000056413 | 13319 Adap1         |
| ENSMUSG00000106112 | 13320 Gm43434       |
| ENSMUSG00000072255 | 13321 Rpl31-ps17    |
| ENSMUSG00000087261 | 13322 Gm15477       |
| ENSMUSG00000073437 | 13323 D330041H03Rik |
| ENSMUSG00000029167 | 13324 Ppargc1a      |
| ENSMUSG00000082938 | 13325 Gm2810        |
| ENSMUSG00000107951 | 13326 RP24-407P8.1  |
| ENSMUSG00000020431 | 13327 Adcy1         |
| ENSMUSG00000096755 | 13328 Gm20746       |
| ENSMUSG00000000693 | 13329 Loxl3         |
| ENSMUSG00000035936 | 13330 Aldh5a1       |
| ENSMUSG00000023259 | 13331 Slc26a6       |
| ENSMUSG00000030742 | 13332 Lat           |
| ENSMUSG00000074865 | 13333 Zfp934        |
| ENSMUSG00000009145 | 13334 Dqx1          |
| ENSMUSG00000044976 | 13335 Wdr72         |
| ENSMUSG00000060131 | 13336 Atp8b4        |
| ENSMUSG00000079144 | 13337 A130010J15Rik |
| ENSMUSG00000080974 | 13338 Gm9009        |
| ENSMUSG00000033233 | 13339 Trim45        |
| ENSMUSG00000071265 | 13340 1700086L19Rik |
| ENSMUSG00000063816 | 13341 Gm4987        |
| ENSMUSG00000038570 | 13342 Saxo2         |
| ENSMUSG00000040502 | 13343 9-Mar         |
| ENSMUSG00000030887 | 13344 Pdzd9         |
| ENSMUSG00000024114 | 13345 Prss41        |
| ENSMUSG00000082743 | 13346 Gm12988       |
| ENSMUSG00000087022 | 13347 9130024F11Rik |
| ENSMUSG00000027983 | 13348 Cyp2u1        |
| ENSMUSG00000035364 | 13349 4930524J08Rik |
| ENSMUSG00000004113 | 13350 Cacna1b       |
| ENSMUSG00000096935 | 13351 1700113A16Rik |
| ENSMUSG00000055978 | 13352 Fut2          |
| ENSMUSG00000097697 | 13353 4833412C05Rik |
| ENSMUSG00000029605 | 13354 Oas1b         |

|                    |                     |
|--------------------|---------------------|
| ENSMUSG00000060586 | 13355 H2-Eb1        |
| ENSMUSG00000021234 | 13356 Fam161b       |
| ENSMUSG00000001156 | 13357 Mxd1          |
| ENSMUSG00000026407 | 13358 Cacna1s       |
| ENSMUSG00000029205 | 13359 Chrna9        |
| ENSMUSG00000022857 | 13360 Tmprss15      |
| ENSMUSG00000072663 | 13361 Spef2         |
| ENSMUSG00000073130 | 13362 Gm1141        |
| ENSMUSG00000006651 | 13363 Aplp1         |
| ENSMUSG00000048796 | 13364 Cyb561d1      |
| ENSMUSG00000082912 | 13365 Gm8770        |
| ENSMUSG00000107253 | 13366 Gm43634       |
| ENSMUSG00000096740 | 13367 Lbhd1         |
| ENSMUSG00000094091 | 13368 Gm21885       |
| ENSMUSG00000027702 | 13369 Lrrc34        |
| ENSMUSG00000045629 | 13370 Sh3tc2        |
| ENSMUSG00000082927 | 13371 Gm5863        |
| ENSMUSG00000022899 | 13372 Slc15a2       |
| ENSMUSG00000030223 | 13373 Ptpro         |
| ENSMUSG00000087151 | 13374 Gm14022       |
| ENSMUSG00000085595 | 13375 Gm16090       |
| ENSMUSG00000106550 | 13376 Gm43646       |
| ENSMUSG00000043969 | 13377 Emx2          |
| ENSMUSG00000083993 | 13378 Gm14398       |
| ENSMUSG00000057286 | 13379 St6galnac2    |
| ENSMUSG00000022657 | 13380 Cd96          |
| ENSMUSG00000092310 | 13381 Gm20509       |
| ENSMUSG00000031085 | 13382 Gm498         |
| ENSMUSG00000045094 | 13383 Arhgef37      |
| ENSMUSG00000014747 | 13384 Ankrd53       |
| ENSMUSG00000024421 | 13385 Lama3         |
| ENSMUSG00000078879 | 13386 Gm14306       |
| ENSMUSG00000033949 | 13387 Trim36        |
| ENSMUSG00000020424 | 13388 Gatsl3        |
| ENSMUSG00000082491 | 13389 Gm5909        |
| ENSMUSG00000071893 | 13390 Vmn1r4        |
| ENSMUSG00000021198 | 13391 Unc79         |
| ENSMUSG00000000792 | 13392 Slc5a5        |
| ENSMUSG00000050737 | 13393 Ptges         |
| ENSMUSG00000036231 | 13394 Agr3          |
| ENSMUSG00000090248 | 13395 Gm14027       |
| ENSMUSG00000086938 | 13396 4930481A15Rik |

|                    |                     |
|--------------------|---------------------|
| ENSMUSG00000093677 | 13397 Gm20712       |
| ENSMUSG00000103922 | 13398 Gm6123        |
| ENSMUSG00000037432 | 13399 Fer1l5        |
| ENSMUSG00000086564 | 13400 Cd101         |
| ENSMUSG00000041912 | 13401 Tdrkh         |
| ENSMUSG00000061619 | 13402 Vma21-ps      |
| ENSMUSG00000022429 | 13403 Dmc1          |
| ENSMUSG00000079105 | 13404 C7            |
| ENSMUSG00000103097 | 13405 Gm37556       |
| ENSMUSG00000052675 | 13406 Zfp112        |
| ENSMUSG00000028441 | 13407 1110017D15Rik |
| ENSMUSG00000083391 | 13408 Gm14148       |
| ENSMUSG00000101493 | 13409 2810405F17Rik |
| ENSMUSG00000039543 | 13410 Cfap70        |
| ENSMUSG00000098541 | 13411 Gm27535       |
| ENSMUSG00000030735 | 13412 Gm9755        |
| ENSMUSG00000045761 | 13413 Fam179a       |
| ENSMUSG00000098912 | 13414 1500004A13Rik |
| ENSMUSG00000032523 | 13415 Hhatl         |
| ENSMUSG00000039860 | 13416 Srrm3         |
| ENSMUSG00000034266 | 13417 Batf          |
| ENSMUSG00000043102 | 13418 Qrfp          |
| ENSMUSG00000064231 | 13419 Gm5321        |
| ENSMUSG00000092260 | 13420 Zfp963        |
| ENSMUSG00000054426 | 13421 A930005H10Rik |
| ENSMUSG00000084288 | 13422 Gm5228        |
| ENSMUSG00000074678 | 13423 Defb25        |
| ENSMUSG00000020241 | 13424 Col6a2        |
| ENSMUSG00000033249 | 13425 Hsf4          |
| ENSMUSG00000065952 | 13426 C330021F23Rik |
| ENSMUSG00000074340 | 13427 Ovgp1         |
| ENSMUSG00000086509 | 13428 Nkx2-2os      |
| ENSMUSG00000087056 | 13429 Gm14004       |
| ENSMUSG00000106246 | 13430 Gm18867       |
| ENSMUSG00000029384 | 13431 2010109A12Rik |
| ENSMUSG00000003812 | 13432 Dnase2a       |
| ENSMUSG00000021874 | 13433 4933413J09Rik |
| ENSMUSG00000045326 | 13434 Fndc7         |
| ENSMUSG00000086213 | 13435 A330040F15Rik |
| ENSMUSG00000045005 | 13436 Fzd5          |
| ENSMUSG00000024076 | 13437 Vit           |
| ENSMUSG00000067351 | 13438 Rps15a-ps2    |



|                    |                     |
|--------------------|---------------------|
| ENSMUSG00000042202 | 13439 Slc35e2       |
| ENSMUSG00000074039 | 13440 4930520004Rik |
| ENSMUSG00000029330 | 13441 Cds1          |
| ENSMUSG00000022236 | 13442 Ropn1l        |
| ENSMUSG00000083326 | 13443 Rpl38-ps1     |
| ENSMUSG00000100018 | 13444 Gm7776        |
| ENSMUSG00000022157 | 13445 Mcpt8         |
| ENSMUSG00000034664 | 13446 Itga2b        |
| ENSMUSG00000038781 | 13447 Stap2         |
| ENSMUSG00000090840 | 13448 1700092M07Rik |
| ENSMUSG00000024935 | 13449 Slc1a1        |
| ENSMUSG00000083397 | 13450 Gm5466        |
| ENSMUSG00000022831 | 13451 Hcls1         |
| ENSMUSG00000074164 | 13452 Vmn2r-ps54    |
| ENSMUSG00000041696 | 13453 Rasl12        |
| ENSMUSG00000004500 | 13454 Zfp324        |
| ENSMUSG00000063820 | 13455 Arl9          |
| ENSMUSG00000091515 | 13456 Zfp422-rs1    |
| ENSMUSG00000055676 | 13457 Gm5069        |
| ENSMUSG00000035458 | 13458 Tnni3         |
| ENSMUSG00000079450 | 13459 Cldn34c1      |
| ENSMUSG00000030125 | 13460 Lrrc23        |
| ENSMUSG00000098091 | 13461 Gm16470       |
| ENSMUSG00000106530 | 13462 Gm42430       |
| ENSMUSG00000033022 | 13463 Cdo1          |
| ENSMUSG00000082755 | 13464 Gm8692        |
| ENSMUSG00000032492 | 13465 Pth1r         |
| ENSMUSG00000008028 | 13466 1700008O03Rik |
| ENSMUSG00000039164 | 13467 Naif1         |
| ENSMUSG00000075571 | 13468 Defb30        |
| ENSMUSG00000018570 | 13469 2810408A11Rik |
| ENSMUSG00000020679 | 13470 Hnf1b         |
| ENSMUSG00000081376 | 13471 Gm11694       |
| ENSMUSG00000026069 | 13472 Il1rl1        |
| ENSMUSG00000031112 | 13473 Stk26         |
| ENSMUSG00000044860 | 13474 Gm1123        |
| ENSMUSG00000101519 | 13475 Ska2l-ps      |
| ENSMUSG00000108772 | 13476 RP23-402P24.7 |
| ENSMUSG00000002588 | 13477 Pon1          |
| ENSMUSG00000081704 | 13478 Gm14603       |
| ENSMUSG00000022755 | 13479 Adgrg7        |
| ENSMUSG00000048572 | 13480 Tmem252       |

|                    |                     |
|--------------------|---------------------|
| ENSMUSG00000022489 | 13481 Pde1b         |
| ENSMUSG00000034110 | 13482 Kctd7         |
| ENSMUSG00000015355 | 13483 Cd48          |
| ENSMUSG00000026011 | 13484 Ctla4         |
| ENSMUSG00000086835 | 13485 Gm11775       |
| ENSMUSG00000097868 | 13486 A330069E16Rik |
| ENSMUSG00000035177 | 13487 Nlrp2         |
| ENSMUSG00000100733 | 13488 4932411K12Rik |
| ENSMUSG00000054510 | 13489 Gm14461       |
| ENSMUSG00000087215 | 13490 Gm14618       |
| ENSMUSG00000087141 | 13491 Plcx2         |
| ENSMUSG00000030683 | 13492 Sez6l2        |
| ENSMUSG00000102171 | 13493 Gm37874       |
| ENSMUSG00000038457 | 13494 Tmem255b      |
| ENSMUSG00000038180 | 13495 Spag4         |
| ENSMUSG00000029999 | 13496 Tgfa          |
| ENSMUSG00000022832 | 13497 Ropn1         |
| ENSMUSG00000107333 | 13498 Gm43008       |
| ENSMUSG00000015342 | 13499 Xk            |
| ENSMUSG00000062939 | 13500 Stat4         |
| ENSMUSG00000051043 | 13501 Gprc5c        |
| ENSMUSG00000081679 | 13502 Gm11874       |
| ENSMUSG00000082587 | 13503 Gm12129       |
| ENSMUSG00000031099 | 13504 Smarca1       |
| ENSMUSG00000029149 | 13505 Krtcap3       |
| ENSMUSG00000080746 | 13506 Rpsa-ps12     |
| ENSMUSG00000030523 | 13507 Trpm1         |
| ENSMUSG00000097174 | 13508 Gm4890        |
| ENSMUSG00000043251 | 13509 Exoc3l        |
| ENSMUSG00000019080 | 13510 Mfsd3         |
| ENSMUSG00000085861 | 13511 1700016G14Rik |
| ENSMUSG00000021256 | 13512 Vash1         |
| ENSMUSG00000083750 | 13513 Gm14108       |
| ENSMUSG00000027420 | 13514 Bfsp1         |
| ENSMUSG00000061488 | 13515 Rpl27a-ps1    |
| ENSMUSG00000087601 | 13516 Uchl1os       |
| ENSMUSG00000047735 | 13517 Samd9l        |
| ENSMUSG00000029053 | 13518 Prkc2         |
| ENSMUSG00000070692 | 13519 Rps12-ps10    |
| ENSMUSG00000099377 | 13520 Gm6159        |
| ENSMUSG00000093149 | 13521 Gm23374       |
| ENSMUSG00000071151 | 13522 Gm4799        |

|                    |                     |
|--------------------|---------------------|
| ENSMUSG00000108506 | 13523 RP23-207N2.1  |
| ENSMUSG00000082218 | 13524 Gm13602       |
| ENSMUSG00000030669 | 13525 Calca         |
| ENSMUSG00000084302 | 13526 Gm12194       |
| ENSMUSG00000050052 | 13527 Tdrp          |
| ENSMUSG00000048371 | 13528 Pdp2          |
| ENSMUSG00000030590 | 13529 Fam98c        |
| ENSMUSG00000073489 | 13530 Ifi204        |
| ENSMUSG00000074236 | 13531 Gm9387        |
| ENSMUSG00000071537 | 13532 Klrg2         |
| ENSMUSG00000033948 | 13533 Zswim5        |
| ENSMUSG00000034071 | 13534 Zfp551        |
| ENSMUSG00000040258 | 13535 Nxph4         |
| ENSMUSG00000030560 | 13536 Ctsc          |
| ENSMUSG00000074580 | 13537 4931440P22Rik |
| ENSMUSG00000063681 | 13538 Crb1          |
| ENSMUSG00000108736 | 13539 RP24-143K11.1 |
| ENSMUSG00000087600 | 13540 Pmepa1os      |
| ENSMUSG00000074899 | 13541 Sptbn5        |
| ENSMUSG00000084224 | 13542 Gm12337       |
| ENSMUSG00000043831 | 13543 Lysmd4        |
| ENSMUSG00000026114 | 13544 Cnga3         |
| ENSMUSG00000038020 | 13545 Rapgef1       |
| ENSMUSG00000021056 | 13546 Tex21         |
| ENSMUSG00000058743 | 13547 Kcnj14        |
| ENSMUSG00000051439 | 13548 Cd14          |
| ENSMUSG00000035711 | 13549 Dok3          |
| ENSMUSG00000100701 | 13550 Gm19587       |
| ENSMUSG00000024140 | 13551 Epas1         |
| ENSMUSG00000092080 | 13552 Vmn2r16       |
| ENSMUSG00000014782 | 13553 Plekhg4       |
| ENSMUSG00000034997 | 13554 Htr2a         |
| ENSMUSG00000037206 | 13555 Islr          |
| ENSMUSG00000081491 | 13556 Gm12778       |
| ENSMUSG00000064208 | 13557 Gm10145       |
| ENSMUSG00000080845 | 13558 Gm9115        |
| ENSMUSG00000034379 | 13559 Wdr5b         |
| ENSMUSG00000067719 | 13560 Gm10221       |
| ENSMUSG00000090257 | 13561 Gm4524        |
| ENSMUSG00000015090 | 13562 Ptgds         |
| ENSMUSG00000106562 | 13563 Gm5981        |
| ENSMUSG00000050623 | 13564 Tex40         |

|                    |                 |
|--------------------|-----------------|
| ENSMUSG00000096141 | 13565 Dnah7a    |
| ENSMUSG00000044367 | 13566 Slc16a13  |
| ENSMUSG00000043079 | 13567 Synpo     |
| ENSMUSG00000090023 | 13568 Gm16302   |
| ENSMUSG00000005986 | 13569 Ankrd13d  |
| ENSMUSG00000067586 | 13570 S1pr3     |
| ENSMUSG00000020340 | 13571 Cyfip2    |
| ENSMUSG00000107266 | 13572 Gm43698   |
| ENSMUSG00000033276 | 13573 Stk36     |
| ENSMUSG00000087436 | 13574 Gm16156   |
| ENSMUSG00000045287 | 13575 Rtn4rl1   |
| ENSMUSG00000069041 | 13576 Slc25a31  |
| ENSMUSG00000027858 | 13577 Tspan2    |
| ENSMUSG00000029862 | 13578 Clcn1     |
| ENSMUSG00000024371 | 13579 C2        |
| ENSMUSG00000085628 | 13580 Appbp2os  |
| ENSMUSG00000100618 | 13581 Gm29595   |
| ENSMUSG00000037979 | 13582 Ccdc92    |
| ENSMUSG00000028938 | 13583 Galnt15   |
| ENSMUSG00000003872 | 13584 Lin7b     |
| ENSMUSG00000104241 | 13585 Gm9442    |
| ENSMUSG00000035964 | 13586 Tmem59l   |
| ENSMUSG00000029544 | 13587 Cabp1     |
| ENSMUSG00000044734 | 13588 Serpinb1a |
| ENSMUSG00000045007 | 13589 Tubg2     |
| ENSMUSG00000084223 | 13590 Gm12244   |
| ENSMUSG00000022773 | 13591 Ypel1     |
| ENSMUSG00000084079 | 13592 Gm11631   |
| ENSMUSG00000106799 | 13593 Gm20756   |
| ENSMUSG00000026825 | 13594 Dnm1      |
| ENSMUSG00000045282 | 13595 Tmem86b   |
| ENSMUSG00000037989 | 13596 Wnk2      |
| ENSMUSG00000022901 | 13597 Cd86      |
| ENSMUSG00000039813 | 13598 Tbc1d2    |
| ENSMUSG00000096474 | 13599 Gm5561    |
| ENSMUSG00000021090 | 13600 Lrrc9     |
| ENSMUSG00000001021 | 13601 S100a3    |
| ENSMUSG00000037752 | 13602 Xkr8      |
| ENSMUSG00000038304 | 13603 Cd160     |
| ENSMUSG00000084828 | 13604 Gm12367   |
| ENSMUSG00000080002 | 13605 Gm5566    |
| ENSMUSG00000020374 | 13606 Rasgef1c  |

|                    |                     |
|--------------------|---------------------|
| ENSMUSG00000081152 | 13607 Gm12430       |
| ENSMUSG00000031139 | 13608 Mcf2          |
| ENSMUSG00000021622 | 13609 Ckmt2         |
| ENSMUSG00000034551 | 13610 Hdx           |
| ENSMUSG00000100459 | 13611 Gm5833        |
| ENSMUSG00000023959 | 13612 Clic5         |
| ENSMUSG00000020566 | 13613 Atp6v1c2      |
| ENSMUSG00000019989 | 13614 Enpp3         |
| ENSMUSG00000068740 | 13615 Celsr2        |
| ENSMUSG00000035528 | 13616 Npffr2        |
| ENSMUSG00000049313 | 13617 Sorl1         |
| ENSMUSG00000091058 | 13618 Gm17538       |
| ENSMUSG00000074628 | 13619 Tldc2         |
| ENSMUSG00000068129 | 13620 Cst7          |
| ENSMUSG00000042834 | 13621 Nrep          |
| ENSMUSG00000097603 | 13622 A430010J10Rik |
| ENSMUSG00000024818 | 13623 Slc25a45      |
| ENSMUSG00000100764 | 13624 Gm29155       |
| ENSMUSG00000021933 | 13625 Gucy1b2       |
| ENSMUSG00000083460 | 13626 Gm12182       |
| ENSMUSG00000106577 | 13627 Gm31026       |
| ENSMUSG00000075609 | 13628 Gm7935        |
| ENSMUSG00000039063 | 13629 Echdc3        |
| ENSMUSG00000053914 | 13630 Kdm4d         |
| ENSMUSG00000097426 | 13631 Gm8941        |
| ENSMUSG00000030929 | 13632 Eri2          |
| ENSMUSG00000059301 | 13633 Gm5434        |
| ENSMUSG00000097340 | 13634 Gm26617       |
| ENSMUSG00000070780 | 13635 Rbm47         |
| ENSMUSG00000022487 | 13636 Gtsf1         |
| ENSMUSG00000022802 | 13637 Lmln          |
| ENSMUSG00000035239 | 13638 Neu3          |
| ENSMUSG00000005951 | 13639 Shpk          |
| ENSMUSG00000068959 | 13640 Zfp619        |
| ENSMUSG00000021457 | 13641 Syk           |
| ENSMUSG00000062704 | 13642 9430002A10Rik |
| ENSMUSG00000031549 | 13643 Ido2          |
| ENSMUSG00000102298 | 13644 Gm33707       |
| ENSMUSG00000097552 | 13645 Rps19-ps12    |
| ENSMUSG00000032818 | 13646 Loxhd1        |
| ENSMUSG00000025064 | 13647 Col17a1       |
| ENSMUSG00000083897 | 13648 Gm14843       |

|                    |                     |
|--------------------|---------------------|
| ENSMUSG00000030823 | 13649 9130019O22Rik |
| ENSMUSG00000057093 | 13650 C030039L03Rik |
| ENSMUSG00000078815 | 13651 Cacng6        |
| ENSMUSG00000020333 | 13652 Acsl6         |
| ENSMUSG00000095836 | 13653 Gm21960       |
| ENSMUSG00000031442 | 13654 Mcf2l         |
| ENSMUSG00000045463 | 13655 Slco6b1       |
| ENSMUSG00000020183 | 13656 Cpm           |
| ENSMUSG00000028358 | 13657 Zfp618        |
| ENSMUSG00000033006 | 13658 Sox10         |
| ENSMUSG00000046157 | 13659 Tmem229b      |
| ENSMUSG00000048349 | 13660 Pou4f1        |
| ENSMUSG00000053559 | 13661 Smagp         |
| ENSMUSG00000073530 | 13662 Pappa2        |
| ENSMUSG00000071553 | 13663 Cpa2          |
| ENSMUSG00000074179 | 13664 Gm10639       |
| ENSMUSG00000039330 | 13665 Tsga10ip      |
| ENSMUSG00000100725 | 13666 Gm28062       |
| ENSMUSG00000016756 | 13667 Cmah          |
| ENSMUSG00000047501 | 13668 Cldn4         |
| ENSMUSG00000021749 | 13669 Oit1          |
| ENSMUSG00000033126 | 13670 Ybey          |
| ENSMUSG00000028654 | 13671 Mycl          |
| ENSMUSG00000087496 | 13672 Gm13523       |
| ENSMUSG00000026824 | 13673 Kcnj3         |
| ENSMUSG00000033105 | 13674 Lss           |
| ENSMUSG00000044330 | 13675 Gm9790        |
| ENSMUSG00000086109 | 13676 Gm13391       |
| ENSMUSG00000083356 | 13677 Gm11708       |
| ENSMUSG00000059326 | 13678 Csf2ra        |
| ENSMUSG00000074059 | 13679 Fbxw18        |
| ENSMUSG00000042724 | 13680 Map3k9        |
| ENSMUSG00000083811 | 13681 Gm13071       |
| ENSMUSG00000020878 | 13682 Lrrc46        |
| ENSMUSG00000029075 | 13683 Tnfrsf4       |
| ENSMUSG00000036578 | 13684 Fxyd7         |
| ENSMUSG00000001558 | 13685 Klhl10        |
| ENSMUSG00000070407 | 13686 Hs3st3b1      |
| ENSMUSG00000081222 | 13687 Gm15173       |
| ENSMUSG00000056359 | 13688 D830013O20Rik |
| ENSMUSG00000088246 | 13689 Gm25911       |
| ENSMUSG00000101225 | 13690 1700008J07Rik |

|                     |                     |
|---------------------|---------------------|
| ENSMUSG00000020020  | 13691 Usp44         |
| ENSMUSG00000054723  | 13692 Vmac          |
| ENSMUSG00000031910  | 13693 Has3          |
| ENSMUSG00000078180  | 13694 Gm20900       |
| ENSMUSG00000056856  | 13695 Jakmip3       |
| ENSMUSG00000028927  | 13696 Padi2         |
| ENSMUSG00000097930  | 13697 C330002G04Rik |
| ENSMUSG00000006611  | 13698 Hfe           |
| ENSMUSG00000046101  | 13699 Mcmdc2        |
| ENSMUSG00000029627  | 13700 Zkscan14      |
| ENSMUSG00000043461  | 13701 Sptssb        |
| ENSMUSG00000090272  | 13702 Mndal         |
| ENSMUSG000000104434 | 13703 Gm37421       |
| ENSMUSG00000055862  | 13704 Izumo4        |
| ENSMUSG00000095930  | 13705 Nim1k         |
| ENSMUSG00000097370  | 13706 4930467K11Rik |
| ENSMUSG00000028076  | 13707 Cd1d1         |
| ENSMUSG00000031125  | 13708 3830403N18Rik |
| ENSMUSG00000094185  | 13709 Gm5445        |
| ENSMUSG00000097285  | 13710 Gm26683       |
| ENSMUSG00000037463  | 13711 Fbxo27        |
| ENSMUSG00000048503  | 13712 Tmem136       |
| ENSMUSG00000099751  | 13713 1700022A22Rik |
| ENSMUSG00000006675  | 13714 P4htm         |
| ENSMUSG00000005649  | 13715 Cabp5         |
| ENSMUSG00000071073  | 13716 Lrrc73        |
| ENSMUSG00000044595  | 13717 Dnd1          |
| ENSMUSG00000035435  | 13718 Abca17        |
| ENSMUSG00000033826  | 13719 Dnah8         |
| ENSMUSG00000027610  | 13720 Gss           |
| ENSMUSG000000108415 | 13721 RP24-191C15.5 |
| ENSMUSG000000104014 | 13722 4930562F17Rik |
| ENSMUSG00000041798  | 13723 Gck           |
| ENSMUSG00000034493  | 13724 4930556J24Rik |
| ENSMUSG00000074238  | 13725 Ap1ar         |
| ENSMUSG00000022217  | 13726 Emc9          |
| ENSMUSG00000067577  | 13727 A430093F15Rik |
| ENSMUSG000000107911 | 13728 RP24-200H19.1 |
| ENSMUSG00000090084  | 13729 SrpX          |
| ENSMUSG00000046814  | 13730 Gchfr         |
| ENSMUSG00000039099  | 13731 Wdr93         |
| ENSMUSG00000088689  | 13732 Scarna17      |

|                    |                     |
|--------------------|---------------------|
| ENSMUSG00000100679 | 13733 Gm28778       |
| ENSMUSG00000047344 | 13734 Lancl3        |
| ENSMUSG00000090105 | 13735 Gm15890       |
| ENSMUSG00000036151 | 13736 Tm6sf2        |
| ENSMUSG00000046634 | 13737 Pkd1l1        |
| ENSMUSG00000044461 | 13738 Shisa2        |
| ENSMUSG00000022025 | 13739 Lect1         |
| ENSMUSG00000078519 | 13740 2310026L22Rik |
| ENSMUSG00000082799 | 13741 Gm14554       |
| ENSMUSG00000085923 | 13742 Gm12781       |
| ENSMUSG00000057157 | 13743 Gm6054        |
| ENSMUSG00000035759 | 13744 Bbs10         |
| ENSMUSG00000050022 | 13745 Amz1          |
| ENSMUSG00000052373 | 13746 Mpp3          |
| ENSMUSG00000101476 | 13747 Gm29570       |
| ENSMUSG00000035910 | 13748 Dcdc2a        |
| ENSMUSG00000028865 | 13749 Cd164l2       |
| ENSMUSG00000030491 | 13750 Tdrd12        |
| ENSMUSG00000091228 | 13751 Gm20390       |
| ENSMUSG00000039936 | 13752 Pik3cd        |
| ENSMUSG00000050132 | 13753 Sarm1         |
| ENSMUSG00000083199 | 13754 Gm9432        |
| ENSMUSG00000027848 | 13755 Olfml3        |
| ENSMUSG00000040323 | 13756 Gm15429       |
| ENSMUSG00000086853 | 13757 Gm14720       |
| ENSMUSG00000029491 | 13758 Pde6b         |
| ENSMUSG00000021061 | 13759 Sptb          |
| ENSMUSG00000031661 | 13760 Nkd1          |
| ENSMUSG00000045875 | 13761 Adra1a        |
| ENSMUSG00000033966 | 13762 Cdkl4         |
| ENSMUSG00000025375 | 13763 Aatk          |
| ENSMUSG00000100020 | 13764 Gm19086       |
| ENSMUSG00000070667 | 13765 Rpl31-ps10    |
| ENSMUSG00000021678 | 13766 F2rl1         |
| ENSMUSG00000099870 | 13767 Gm7200        |
| ENSMUSG00000095600 | 13768 Gm9457        |
| ENSMUSG00000097451 | 13769 Rian          |
| ENSMUSG00000046806 | 13770 3110062M04Rik |
| ENSMUSG00000108045 | 13771 RP24-278l6.1  |
| ENSMUSG00000066407 | 13772 Gm10263       |
| ENSMUSG00000063932 | 13773 Poteg         |
| ENSMUSG00000081073 | 13774 Gm13758       |



|                    |                     |
|--------------------|---------------------|
| ENSMUSG00000003411 | 13775 Rab3b         |
| ENSMUSG00000063442 | 13776 Gm7117        |
| ENSMUSG00000101482 | 13777 Gm28883       |
| ENSMUSG00000074627 | 13778 Mroh8         |
| ENSMUSG00000044164 | 13779 Rnf182        |
| ENSMUSG00000041351 | 13780 Rap1gap       |
| ENSMUSG00000053862 | 13781 Slc51b        |
| ENSMUSG00000106827 | 13782 Gm7556        |
| ENSMUSG00000058581 | 13783 Gm5801        |
| ENSMUSG00000082922 | 13784 Gm6939        |
| ENSMUSG00000081600 | 13785 Gm12286       |
| ENSMUSG00000105181 | 13786 Gm19620       |
| ENSMUSG00000019832 | 13787 Rab32         |
| ENSMUSG00000002565 | 13788 Scin          |
| ENSMUSG00000038173 | 13789 Enpp6         |
| ENSMUSG00000085526 | 13790 Gm16083       |
| ENSMUSG00000051246 | 13791 Msantd1       |
| ENSMUSG00000092564 | 13792 BC051226      |
| ENSMUSG00000042510 | 13793 AA986860      |
| ENSMUSG00000053046 | 13794 Brsk2         |
| ENSMUSG00000079326 | 13795 Gm15262       |
| ENSMUSG00000104653 | 13796 Gm43109       |
| ENSMUSG00000102692 | 13797 Dchs2         |
| ENSMUSG00000104588 | 13798 Gm43666       |
| ENSMUSG00000099413 | 13799 Gm17767       |
| ENSMUSG00000024598 | 13800 Fbn2          |
| ENSMUSG00000081789 | 13801 Gm11893       |
| ENSMUSG00000022537 | 13802 Tmem44        |
| ENSMUSG00000068969 | 13803 Rpl32-ps      |
| ENSMUSG00000021850 | 13804 1700011H14Rik |
| ENSMUSG00000006462 | 13805 A530013C23Rik |
| ENSMUSG00000084133 | 13806 Gm12856       |
| ENSMUSG00000103901 | 13807 Gm37499       |
| ENSMUSG00000108668 | 13808 RP23-178C20.2 |
| ENSMUSG00000090544 | 13809 Gm6576        |
| ENSMUSG00000029832 | 13810 Nfe2l3        |
| ENSMUSG00000046782 | 13811 4921506M07Rik |
| ENSMUSG00000058297 | 13812 Spock2        |
| ENSMUSG00000022525 | 13813 Hrasls        |
| ENSMUSG00000090381 | 13814 Gm6158        |
| ENSMUSG00000020577 | 13815 Tspan13       |
| ENSMUSG00000026927 | 13816 Sdccag3       |

|                    |                     |
|--------------------|---------------------|
| ENSMUSG00000038007 | 13817 Acer2         |
| ENSMUSG00000038065 | 13818 Mturn         |
| ENSMUSG00000100405 | 13819 Gm28911       |
| ENSMUSG00000085882 | 13820 2610507I01Rik |
| ENSMUSG00000005237 | 13821 Dnah2         |
| ENSMUSG00000074412 | 13822 Gm10689       |
| ENSMUSG00000032066 | 13823 Bco2          |
| ENSMUSG00000042638 | 13824 Gucy2c        |
| ENSMUSG00000039989 | 13825 Cbx4          |
| ENSMUSG00000021534 | 13826 1700001L19Rik |
| ENSMUSG00000049562 | 13827 Ap5b1         |
| ENSMUSG00000055692 | 13828 Tmem191c      |
| ENSMUSG00000053399 | 13829 Adamts18      |
| ENSMUSG00000072640 | 13830 Lym9          |
| ENSMUSG00000046761 | 13831 Fam83h        |
| ENSMUSG00000020782 | 13832 Llgl2         |
| ENSMUSG00000108437 | 13833 RP24-144C5.3  |
| ENSMUSG00000081121 | 13834 Gm12791       |
| ENSMUSG00000039518 | 13835 Cdsn          |
| ENSMUSG00000037762 | 13836 Slc16a9       |
| ENSMUSG00000032224 | 13837 Fam81a        |
| ENSMUSG00000062309 | 13838 Rpp25         |
| ENSMUSG00000078502 | 13839 Gm13212       |
| ENSMUSG00000069996 | 13840 Gm7125        |
| ENSMUSG00000040424 | 13841 Hipk4         |
| ENSMUSG00000008932 | 13842 Slc1a7        |
| ENSMUSG00000037913 | 13843 Tmem156       |
| ENSMUSG00000082220 | 13844 Gm12943       |
| ENSMUSG00000033882 | 13845 Rbm46         |
| ENSMUSG00000097784 | 13846 A430105J06Rik |
| ENSMUSG00000085282 | 13847 Gm15663       |
| ENSMUSG00000094282 | 13848 Ccdc42b       |
| ENSMUSG00000045827 | 13849 Serpinb9      |
| ENSMUSG00000022102 | 13850 Dok2          |
| ENSMUSG00000097626 | 13851 4921504A21Rik |
| ENSMUSG00000084297 | 13852 Gm13755       |
| ENSMUSG00000025515 | 13853 Muc2          |
| ENSMUSG00000091985 | 13854 Gm17354       |
| ENSMUSG00000004698 | 13855 Hdac9         |
| ENSMUSG00000021998 | 13856 Lcp1          |
| ENSMUSG00000021611 | 13857 Tert          |
| ENSMUSG00000037822 | 13858 Smim14        |

|                     |                     |
|---------------------|---------------------|
| ENSMUSG00000025370  | 13859 Cdh9          |
| ENSMUSG00000071230  | 13860 Npw           |
| ENSMUSG00000082778  | 13861 Gm15191       |
| ENSMUSG00000027157  | 13862 4930430A15Rik |
| ENSMUSG00000041605  | 13863 5730559C18Rik |
| ENSMUSG00000084413  | 13864 Gm12017       |
| ENSMUSG00000083890  | 13865 Gm15703       |
| ENSMUSG00000078794  | 13866 Dact3         |
| ENSMUSG00000047473  | 13867 Zfp30         |
| ENSMUSG00000026544  | 13868 Dusp23        |
| ENSMUSG00000087532  | 13869 Gm15938       |
| ENSMUSG00000038641  | 13870 Akr1d1        |
| ENSMUSG00000098176  | 13871 Ccdc166       |
| ENSMUSG00000025328  | 13872 Padi3         |
| ENSMUSG00000037708  | 13873 Spag6l        |
| ENSMUSG000000106350 | 13874 Gm4869        |
| ENSMUSG00000096918  | 13875 Gm16863       |
| ENSMUSG00000024030  | 13876 Abcg1         |
| ENSMUSG00000006638  | 13877 Abhd1         |
| ENSMUSG00000097177  | 13878 9330159M07Rik |
| ENSMUSG00000085401  | 13879 Slc39a1-ps    |
| ENSMUSG00000079478  | 13880 Sssca1        |
| ENSMUSG00000035179  | 13881 Ppp1r32       |
| ENSMUSG00000049536  | 13882 Tceal1        |
| ENSMUSG00000074207  | 13883 Adh1          |
| ENSMUSG00000079357  | 13884 Gm11100       |
| ENSMUSG00000039873  | 13885 Neurl2        |
| ENSMUSG00000090460  | 13886 Gm17511       |
| ENSMUSG00000056436  | 13887 Cyct          |
| ENSMUSG00000065608  | 13888 Mirlet7c-2    |
| ENSMUSG00000085066  | 13889 Gm4989        |
| ENSMUSG00000096986  | 13890 4930509E16Rik |
| ENSMUSG00000024727  | 13891 Trpm6         |
| ENSMUSG00000060284  | 13892 Sp7           |
| ENSMUSG00000069236  | 13893 Gm7251        |
| ENSMUSG00000022002  | 13894 Erich6b       |
| ENSMUSG00000085689  | 13895 Gm16838       |
| ENSMUSG00000084771  | 13896 A230072E10Rik |
| ENSMUSG00000024905  | 13897 Mtl5          |
| ENSMUSG00000040247  | 13898 Tbc1d10c      |
| ENSMUSG00000097636  | 13899 Mirt1         |
| ENSMUSG000000105635 | 13900 CU024892.1    |

|                     |                     |
|---------------------|---------------------|
| ENSMUSG00000034164  | 13901 Emid1         |
| ENSMUSG00000029830  | 13902 Svopl         |
| ENSMUSG00000082125  | 13903 Gm14679       |
| ENSMUSG00000029660  | 13904 Tex26         |
| ENSMUSG00000032186  | 13905 Tmod2         |
| ENSMUSG00000060397  | 13906 Zfp128        |
| ENSMUSG00000022149  | 13907 C9            |
| ENSMUSG00000070610  | 13908 Gm13127       |
| ENSMUSG00000068697  | 13909 Myoz1         |
| ENSMUSG00000038045  | 13910 Sult6b1       |
| ENSMUSG00000066116  | 13911 Gm10154       |
| ENSMUSG00000028341  | 13912 Nr4a3         |
| ENSMUSG00000081067  | 13913 Gm12912       |
| ENSMUSG00000061882  | 13914 Ccdc62        |
| ENSMUSG00000051627  | 13915 Hist1h1e      |
| ENSMUSG00000021790  | 13916 Dydc1         |
| ENSMUSG00000031283  | 13917 Chrdl1        |
| ENSMUSG00000060176  | 13918 Kif27         |
| ENSMUSG000000107900 | 13919 RP24-222N4.2  |
| ENSMUSG00000048538  | 13920 Gm9826        |
| ENSMUSG00000054034  | 13921 Tceal5        |
| ENSMUSG00000029869  | 13922 Ephb6         |
| ENSMUSG00000042363  | 13923 Lgalsl        |
| ENSMUSG00000039891  | 13924 Txlnb         |
| ENSMUSG00000000416  | 13925 Ctnnbp2       |
| ENSMUSG00000057223  | 13926 Gm6578        |
| ENSMUSG00000071648  | 13927 Rom1          |
| ENSMUSG00000053475  | 13928 Tnfai6        |
| ENSMUSG00000036655  | 13929 Colec11       |
| ENSMUSG00000082776  | 13930 Gm7061        |
| ENSMUSG00000097882  | 13931 0610038B21Rik |
| ENSMUSG00000099964  | 13932 Gm29514       |
| ENSMUSG000000100807 | 13933 Gm29521       |
| ENSMUSG00000085037  | 13934 4933421O10Rik |
| ENSMUSG00000041735  | 13935 Gm13178       |
| ENSMUSG00000028589  | 13936 1700012P22Rik |
| ENSMUSG00000098082  | 13937 Gm20574       |
| ENSMUSG000000107211 | 13938 Gm5864        |
| ENSMUSG00000098080  | 13939 Gm5732        |
| ENSMUSG00000083318  | 13940 Gm15192       |
| ENSMUSG000000103735 | 13941 Gm38317       |
| ENSMUSG00000041134  | 13942 Cyyr1         |

|                     |                     |
|---------------------|---------------------|
| ENSMUSG00000068062  | 13943 Gm14164       |
| ENSMUSG00000096988  | 13944 A930029G22Rik |
| ENSMUSG00000050650  | 13945 Mrgpra1       |
| ENSMUSG00000097665  | 13946 Gm16853       |
| ENSMUSG00000040428  | 13947 Plekha4       |
| ENSMUSG00000041757  | 13948 Plekha6       |
| ENSMUSG000000100648 | 13949 Gm28659       |
| ENSMUSG00000082794  | 13950 Gm6806        |
| ENSMUSG00000085611  | 13951 Ap3s1-ps1     |
| ENSMUSG00000081578  | 13952 Gm12611       |
| ENSMUSG00000039252  | 13953 Lgi2          |
| ENSMUSG00000037418  | 13954 Best1         |
| ENSMUSG00000055795  | 13955 Gm5160        |
| ENSMUSG00000087066  | 13956 Gm15518       |
| ENSMUSG00000026567  | 13957 Adcy10        |
| ENSMUSG00000097030  | 13958 Gm26693       |
| ENSMUSG00000091908  | 13959 Gm17231       |
| ENSMUSG00000009093  | 13960 Gstt4         |
| ENSMUSG00000043822  | 13961 Adamtsl5      |
| ENSMUSG000000105961 | 13962 Gm42754       |
| ENSMUSG00000041323  | 13963 Ak7           |
| ENSMUSG00000000627  | 13964 Sema4f        |
| ENSMUSG00000047632  | 13965 Fgfbp3        |
| ENSMUSG00000059555  | 13966 Tor4a         |
| ENSMUSG00000033967  | 13967 Rnf225        |
| ENSMUSG00000028407  | 13968 Toporsos      |
| ENSMUSG00000047810  | 13969 Ccdc88b       |
| ENSMUSG00000079471  | 13970 Gm7325        |
| ENSMUSG00000044364  | 13971 Tmem74b       |
| ENSMUSG00000047657  | 13972 Crry-ps       |
| ENSMUSG00000055305  | 13973 Zfp93         |
| ENSMUSG000000107261 | 13974 Trmt112-ps1   |
| ENSMUSG00000030825  | 13975 Hsd17b14      |
| ENSMUSG00000017754  | 13976 Pltp          |
| ENSMUSG00000020712  | 13977 Tcam1         |
| ENSMUSG00000016200  | 13978 Syt14         |
| ENSMUSG00000044231  | 13979 Nhlrc1        |
| ENSMUSG00000006241  | 13980 Ccdc159       |
| ENSMUSG00000062591  | 13981 Tubb4a        |
| ENSMUSG00000079559  | 13982 Gm684         |
| ENSMUSG00000034614  | 13983 Pik3ip1       |
| ENSMUSG00000097343  | 13984 9030407P20Rik |

|                     |                     |
|---------------------|---------------------|
| ENSMUSG00000042828  | 13985 Trim72        |
| ENSMUSG00000011382  | 13986 Dhdh          |
| ENSMUSG00000025488  | 13987 Cox8b         |
| ENSMUSG000000082900 | 13988 Gm11557       |
| ENSMUSG000000100922 | 13989 Gm8520        |
| ENSMUSG00000037318  | 13990 Traf3ip3      |
| ENSMUSG000000061728 | 13991 Btl7-ps       |
| ENSMUSG00000004988  | 13992 Fxyd4         |
| ENSMUSG00000032103  | 13993 Pus3          |
| ENSMUSG00000017737  | 13994 Mmp9          |
| ENSMUSG00000055833  | 13995 1700034H15Rik |
| ENSMUSG000000086786 | 13996 Gm15908       |
| ENSMUSG000000060487 | 13997 Samd5         |
| ENSMUSG000000080840 | 13998 Gm11349       |
| ENSMUSG000000105153 | 13999 Gm3143        |
| ENSMUSG000000023984 | 14000 Gm20517       |
| ENSMUSG00000031957  | 14001 Ctrb1         |
| ENSMUSG00000042189  | 14002 Tekt3         |
| ENSMUSG000000022286 | 14003 Grhl2         |
| ENSMUSG000000023960 | 14004 Enpp5         |
| ENSMUSG000000083249 | 14005 Gm14623       |
| ENSMUSG000000086733 | 14006 Gm11685       |
| ENSMUSG00000005950  | 14007 P2rx5         |
| ENSMUSG00000022123  | 14008 Scel          |
| ENSMUSG000000032204 | 14009 Aqp9          |
| ENSMUSG00000099842  | 14010 Gm4034        |
| ENSMUSG00000037649  | 14011 H2-DMa        |
| ENSMUSG000000025197 | 14012 Cyp2c44       |
| ENSMUSG000000101517 | 14013 4732465J04Rik |
| ENSMUSG00000000142  | 14014 Axin2         |
| ENSMUSG000000028051 | 14015 Hcn3          |
| ENSMUSG000000082361 | 14016 Btc           |
| ENSMUSG000000066878 | 14017 Gm10184       |
| ENSMUSG000000033715 | 14018 Akr1c14       |
| ENSMUSG000000096177 | 14019 Gm5070        |
| ENSMUSG000000086119 | 14020 Gm2415        |
| ENSMUSG000000068587 | 14021 Mgam          |
| ENSMUSG000000026247 | 14022 Ecel1         |
| ENSMUSG000000063001 | 14023 Gm9701        |
| ENSMUSG000000074934 | 14024 Grem1         |
| ENSMUSG000000053334 | 14025 Ficd          |
| ENSMUSG000000097223 | 14026 Gm2449        |

|                    |                     |
|--------------------|---------------------|
| ENSMUSG00000074882 | 14027 Cyp2c68       |
| ENSMUSG00000104212 | 14028 Gm37986       |
| ENSMUSG00000031553 | 14029 Adam3         |
| ENSMUSG00000033063 | 14030 Cntnap3       |
| ENSMUSG00000036925 | 14031 Mucl2         |
| ENSMUSG00000066068 | 14032 Gm13611       |
| ENSMUSG00000046402 | 14033 Rbp1          |
| ENSMUSG00000085491 | 14034 4930527E20Rik |
| ENSMUSG00000075514 | 14035 Gm13375       |
| ENSMUSG00000081099 | 14036 Gm5270        |
| ENSMUSG00000045662 | 14037 Henmt1        |
| ENSMUSG00000097729 | 14038 2310015A10Rik |
| ENSMUSG00000094697 | 14039 Gm10476       |
| ENSMUSG00000000732 | 14040 Icosl         |
| ENSMUSG00000029859 | 14041 Epha1         |
| ENSMUSG00000026271 | 14042 Gpr35         |
| ENSMUSG00000104671 | 14043 Gm43062       |
| ENSMUSG00000103760 | 14044 Gm8009        |
| ENSMUSG00000072492 | 14045 Gm10364       |
| ENSMUSG00000032609 | 14046 Klhdc8b       |
| ENSMUSG00000098149 | 14047 Gapdh-ps14    |
| ENSMUSG00000019066 | 14048 Rab3d         |
| ENSMUSG00000079311 | 14049 Gm3222        |
| ENSMUSG00000036120 | 14050 Rfxank        |
| ENSMUSG00000025407 | 14051 Gli1          |
| ENSMUSG00000103174 | 14052 Gm37168       |
| ENSMUSG00000098156 | 14053 Gm27023       |
| ENSMUSG00000063268 | 14054 Parp10        |
| ENSMUSG00000057156 | 14055 Homez         |
| ENSMUSG00000089889 | 14056 0610040B10Rik |
| ENSMUSG00000104577 | 14057 Gm6641        |
| ENSMUSG00000097836 | 14058 Gm26903       |
| ENSMUSG00000086794 | 14059 Gm11642       |
| ENSMUSG00000062480 | 14060 Acat3         |
| ENSMUSG00000045092 | 14061 S1pr1         |
| ENSMUSG00000027398 | 14062 Il1b          |
| ENSMUSG00000000402 | 14063 Egfl6         |
| ENSMUSG00000097635 | 14064 Gm26826       |
| ENSMUSG00000001225 | 14065 Slc26a3       |
| ENSMUSG00000104642 | 14066 Gm9207        |
| ENSMUSG00000006221 | 14067 Hspb7         |
| ENSMUSG00000028977 | 14068 Casz1         |

|                     |                     |
|---------------------|---------------------|
| ENSMUSG00000052180  | 14069 Serpinb6c     |
| ENSMUSG00000018986  | 14070 Slfn3         |
| ENSMUSG00000038526  | 14071 Car14         |
| ENSMUSG00000081076  | 14072 Rpsa-ps4      |
| ENSMUSG00000050844  | 14073 1700020N01Rik |
| ENSMUSG00000083914  | 14074 Rps18-ps1     |
| ENSMUSG00000053338  | 14075 Tarm1         |
| ENSMUSG00000039810  | 14076 Zc3h10        |
| ENSMUSG00000036912  | 14077 Piwil4        |
| ENSMUSG00000085829  | 14078 Gm4285        |
| ENSMUSG00000027480  | 14079 Sun5          |
| ENSMUSG00000046589  | 14080 Lrrc8e        |
| ENSMUSG00000034028  | 14081 Cd226         |
| ENSMUSG00000069170  | 14082 Adgrv1        |
| ENSMUSG00000081225  | 14083 Cyp2j12       |
| ENSMUSG00000023403  | 14084 Stk31         |
| ENSMUSG00000006731  | 14085 B4galnt1      |
| ENSMUSG00000024136  | 14086 Dnase1l2      |
| ENSMUSG00000053461  | 14087 Hhipl2        |
| ENSMUSG00000083483  | 14088 Gm14044       |
| ENSMUSG00000083713  | 14089 Gm5883        |
| ENSMUSG00000001506  | 14090 Col1a1        |
| ENSMUSG00000097945  | 14091 Gm17799       |
| ENSMUSG00000083424  | 14092 Rpl35a-ps4    |
| ENSMUSG00000015474  | 14093 Ppt2          |
| ENSMUSG00000086927  | 14094 Gm11823       |
| ENSMUSG00000081770  | 14095 Rbpsuh-ps1    |
| ENSMUSG00000052563  | 14096 D930048N14Rik |
| ENSMUSG00000046516  | 14097 Cox17         |
| ENSMUSG00000026360  | 14098 Rgs2          |
| ENSMUSG00000082460  | 14099 Gm13685       |
| ENSMUSG00000099364  | 14100 5730419F03Rik |
| ENSMUSG00000028137  | 14101 Celf3         |
| ENSMUSG000000100261 | 14102 Gm6473        |
| ENSMUSG00000060198  | 14103 Gm11353       |
| ENSMUSG00000032948  | 14104 Lipi          |
| ENSMUSG00000044405  | 14105 Adig          |
| ENSMUSG000000101655 | 14106 2310040G24Rik |
| ENSMUSG00000097657  | 14107 Gm7389        |
| ENSMUSG00000073478  | 14108 D730003I15Rik |
| ENSMUSG00000073680  | 14109 Tmem88b       |
| ENSMUSG00000026365  | 14110 Cfh           |



|                    |                     |
|--------------------|---------------------|
| ENSMUSG00000108183 | 14111 RP23-21F2.6   |
| ENSMUSG00000100706 | 14112 Gm19744       |
| ENSMUSG00000036814 | 14113 Slc6a20a      |
| ENSMUSG00000080968 | 14114 Gm1862        |
| ENSMUSG00000003273 | 14115 Car11         |
| ENSMUSG00000030376 | 14116 Slc8a2        |
| ENSMUSG00000024409 | 14117 Psors1c2      |
| ENSMUSG00000026173 | 14118 Plcd4         |
| ENSMUSG00000034684 | 14119 Sema3f        |
| ENSMUSG00000040841 | 14120 Six5          |
| ENSMUSG00000079362 | 14121 Gbp6          |
| ENSMUSG00000025578 | 14122 Cbx8          |
| ENSMUSG00000068246 | 14123 Apol9b        |
| ENSMUSG00000071303 | 14124 Rps8-ps1      |
| ENSMUSG00000107817 | 14125 RP23-436D14.9 |
| ENSMUSG00000049502 | 14126 Dtx3l         |
| ENSMUSG00000083879 | 14127 Gm14038       |
| ENSMUSG00000030711 | 14128 Sult1a1       |
| ENSMUSG00000036196 | 14129 Slc26a8       |
| ENSMUSG00000046207 | 14130 Pik3r6        |
| ENSMUSG00000106926 | 14131 Rpl7-ps7      |
| ENSMUSG00000084898 | 14132 Gm12371       |
| ENSMUSG00000090291 | 14133 Lrrc10b       |
| ENSMUSG00000098105 | 14134 Gm8825        |
| ENSMUSG00000053886 | 14135 Sh2d4a        |
| ENSMUSG00000022425 | 14136 Enpp2         |
| ENSMUSG00000100025 | 14137 Gm8141        |
| ENSMUSG00000087235 | 14138 Gm4750        |
| ENSMUSG00000082325 | 14139 Gm12642       |
| ENSMUSG00000001227 | 14140 Sema6b        |
| ENSMUSG00000019913 | 14141 Sim1          |
| ENSMUSG00000040584 | 14142 Abcb1a        |
| ENSMUSG00000087408 | 14143 Cers1         |
| ENSMUSG00000043372 | 14144 Hexim2        |
| ENSMUSG00000091971 | 14145 Hspa1a        |
| ENSMUSG00000068629 | 14146 Gm6155        |
| ENSMUSG00000107539 | 14147 RP23-281H4.10 |
| ENSMUSG00000054619 | 14148 Mettl7a1      |
| ENSMUSG00000048924 | 14149 Ccdc125       |
| ENSMUSG00000083258 | 14150 Gm5939        |
| ENSMUSG00000100281 | 14151 4930422M22Rik |
| ENSMUSG00000046192 | 14152 Iqub          |

|                    |                     |
|--------------------|---------------------|
| ENSMUSG00000049409 | 14153 Prokr1        |
| ENSMUSG00000091695 | 14154 Gm17669       |
| ENSMUSG00000027713 | 14155 1810062G17Rik |
| ENSMUSG00000081810 | 14156 Gm11878       |
| ENSMUSG00000037336 | 14157 Mfsd2b        |
| ENSMUSG00000034413 | 14158 Neurl1b       |
| ENSMUSG00000081342 | 14159 Gm11434       |
| ENSMUSG00000037747 | 14160 Phyhipl       |
| ENSMUSG00000020689 | 14161 Itgb3         |
| ENSMUSG00000080896 | 14162 Gm14567       |
| ENSMUSG00000025170 | 14163 Rab40b        |
| ENSMUSG00000074971 | 14164 Fabin         |
| ENSMUSG00000050612 | 14165 Txndc2        |
| ENSMUSG00000051029 | 14166 Serpinb1b     |
| ENSMUSG00000053769 | 14167 Lysmd1        |
| ENSMUSG00000073062 | 14168 Zxdb          |
| ENSMUSG00000035944 | 14169 Ttc38         |
| ENSMUSG00000097316 | 14170 Gm10516       |
| ENSMUSG00000029917 | 14171 C130060K24Rik |
| ENSMUSG00000084280 | 14172 Gm11972       |
| ENSMUSG00000062345 | 14173 Serpinb2      |
| ENSMUSG00000078931 | 14174 Pdf           |
| ENSMUSG00000002396 | 14175 Ocel1         |
| ENSMUSG00000044141 | 14176 E130201H02Rik |
| ENSMUSG00000043488 | 14177 Frmd8os       |
| ENSMUSG00000057657 | 14178 Rps18-ps3     |
| ENSMUSG00000067925 | 14179 Cxx1a         |
| ENSMUSG00000075587 | 14180 Gm11531       |
| ENSMUSG00000103887 | 14181 Gm37008       |
| ENSMUSG00000031098 | 14182 Syt8          |
| ENSMUSG00000102098 | 14183 2310016D03Rik |
| ENSMUSG00000039372 | 14184 4-Mar         |
| ENSMUSG00000026896 | 14185 Ifih1         |
| ENSMUSG00000037982 | 14186 Gm9725        |
| ENSMUSG00000098135 | 14187 Gm6946        |
| ENSMUSG00000031896 | 14188 Ctrl          |
| ENSMUSG00000098713 | 14189 Rps2-ps5      |
| ENSMUSG00000101365 | 14190 Gm19325       |
| ENSMUSG00000086040 | 14191 Wipf3         |
| ENSMUSG00000086422 | 14192 4930421P07Rik |
| ENSMUSG00000082535 | 14193 Gm7860        |
| ENSMUSG00000108504 | 14194 RP23-307M24.1 |

|                    |                     |
|--------------------|---------------------|
| ENSMUSG00000026073 | 14195 Il1r2         |
| ENSMUSG00000062444 | 14196 Ap3b2         |
| ENSMUSG00000032417 | 14197 Rwdd2a        |
| ENSMUSG00000055446 | 14198 A630091E08Rik |
| ENSMUSG00000016763 | 14199 Scube1        |
| ENSMUSG00000073559 | 14200 Gm8618        |
| ENSMUSG00000087518 | 14201 Gm13561       |
| ENSMUSG00000085767 | 14202 Gm13563       |
| ENSMUSG00000091636 | 14203 A330050F15Rik |
| ENSMUSG00000086468 | 14204 Etaa1os       |
| ENSMUSG00000009941 | 14205 Nxf2          |
| ENSMUSG00000003617 | 14206 Cp            |
| ENSMUSG00000054945 | 14207 Gm9958        |
| ENSMUSG00000102220 | 14208 Rpl23a-ps5    |
| ENSMUSG00000087589 | 14209 D430040D24Rik |
| ENSMUSG00000060244 | 14210 Alyref2       |
| ENSMUSG00000041827 | 14211 Oasl1         |
| ENSMUSG00000036185 | 14212 Sapcd1        |
| ENSMUSG00000035296 | 14213 Sgcg          |
| ENSMUSG00000046585 | 14214 Cfap58        |
| ENSMUSG00000028012 | 14215 Rrh           |
| ENSMUSG00000092130 | 14216 D030025P21Rik |
| ENSMUSG00000027886 | 14217 1700013F07Rik |
| ENSMUSG00000022574 | 14218 Naprt         |
| ENSMUSG00000001946 | 14219 Esam          |
| ENSMUSG00000100594 | 14220 2810414N06Rik |
| ENSMUSG00000041986 | 14221 Elmod1        |
| ENSMUSG00000096265 | 14222 4930467E23Rik |
| ENSMUSG00000062124 | 14223 Defb45        |
| ENSMUSG00000097287 | 14224 D130017N08Rik |
| ENSMUSG00000097954 | 14225 Gm4217        |
| ENSMUSG00000083852 | 14226 Gm13007       |
| ENSMUSG00000093598 | 14227 A730085K08Rik |
| ENSMUSG00000101970 | 14228 1810026B05Rik |
| ENSMUSG00000078952 | 14229 Lincenc1      |
| ENSMUSG00000020251 | 14230 Glt8d2        |
| ENSMUSG00000044285 | 14231 Gm1821        |
| ENSMUSG00000028602 | 14232 Tnfrsf8       |
| ENSMUSG00000038390 | 14233 Gpr162        |
| ENSMUSG00000065145 | 14234 Vaultrc5      |
| ENSMUSG00000045215 | 14235 Asxl3         |
| ENSMUSG00000108401 | 14236 RP24-200F21.1 |

|                     |                     |
|---------------------|---------------------|
| ENSMUSG00000045826  | 14237 Ptprcap       |
| ENSMUSG00000071714  | 14238 Csf2rb2       |
| ENSMUSG00000036872  | 14239 Abcc12        |
| ENSMUSG000000106547 | 14240 B230303O12Rik |
| ENSMUSG00000030030  | 14241 1700003E16Rik |
| ENSMUSG00000034839  | 14242 Larp6         |
| ENSMUSG00000022408  | 14243 Fam83f        |
| ENSMUSG00000017314  | 14244 Mpp2          |
| ENSMUSG00000038793  | 14245 Lefty1        |
| ENSMUSG00000042564  | 14246 Fam227a       |
| ENSMUSG00000005045  | 14247 Chd5          |
| ENSMUSG00000084077  | 14248 Gm11952       |
| ENSMUSG00000086657  | 14249 Stamos        |
| ENSMUSG00000053469  | 14250 Tg            |
| ENSMUSG00000040364  | 14251 Sec1          |
| ENSMUSG00000073000  | 14252 Gm10451       |
| ENSMUSG00000083245  | 14253 Gm11185       |
| ENSMUSG00000021363  | 14254 Mak           |
| ENSMUSG00000062365  | 14255 Gm4968        |
| ENSMUSG00000098232  | 14256 Gm3671        |
| ENSMUSG00000032375  | 14257 Aph1b         |
| ENSMUSG00000082601  | 14258 Gm12700       |
| ENSMUSG00000024729  | 14259 1700017D01Rik |
| ENSMUSG00000085303  | 14260 Gm16751       |
| ENSMUSG00000091144  | 14261 Phf11c        |
| ENSMUSG00000098092  | 14262 Gm2076        |
| ENSMUSG00000062175  | 14263 Tgif2         |
| ENSMUSG00000028031  | 14264 Dkk2          |
| ENSMUSG00000006310  | 14265 Zbtb32        |
| ENSMUSG00000043432  | 14266 Leng9         |
| ENSMUSG000000107788 | 14267 RP23-359M3.5  |
| ENSMUSG00000034949  | 14268 Zfr2          |
| ENSMUSG00000065251  | 14269 Gm23971       |
| ENSMUSG00000020622  | 14270 Nt5c1b        |
| ENSMUSG00000050240  | 14271 Hic2          |
| ENSMUSG00000032725  | 14272 Folr2         |
| ENSMUSG00000029650  | 14273 Slc46a3       |
| ENSMUSG000000108151 | 14274 RP23-191I2.3  |
| ENSMUSG00000087478  | 14275 4930506C21Rik |
| ENSMUSG00000054362  | 14276 Lexm          |
| ENSMUSG00000097677  | 14277 Gm26611       |
| ENSMUSG00000042761  | 14278 Mrap2         |

|                     |                     |
|---------------------|---------------------|
| ENSMUSG00000052099  | 14279 Prss51        |
| ENSMUSG00000050321  | 14280 Neto1         |
| ENSMUSG00000034690  | 14281 Nlrp4c        |
| ENSMUSG000000108266 | 14282 RP23-64D14.4  |
| ENSMUSG000000106059 | 14283 Gm9364        |
| ENSMUSG00000068854  | 14284 Hist2h2be     |
| ENSMUSG00000042102  | 14285 Dmgdh         |
| ENSMUSG000000102809 | 14286 Gm8643        |
| ENSMUSG00000028840  | 14287 Zfp593        |
| ENSMUSG000000082746 | 14288 Rps12-ps1     |
| ENSMUSG000000082947 | 14289 Gm12587       |
| ENSMUSG000000083655 | 14290 Gm12099       |
| ENSMUSG000000024180 | 14291 Tmem8         |
| ENSMUSG000000022440 | 14292 C1qtnf6       |
| ENSMUSG000000042333 | 14293 Tnfrsf14      |
| ENSMUSG000000028600 | 14294 Podn          |
| ENSMUSG000000028943 | 14295 Espn          |
| ENSMUSG000000080806 | 14296 Gm13005       |
| ENSMUSG000000021118 | 14297 Plek2         |
| ENSMUSG000000078496 | 14298 Gm13152       |
| ENSMUSG000000047146 | 14299 Tet1          |
| ENSMUSG000000068113 | 14300 Gm4907        |
| ENSMUSG000000055435 | 14301 Maf           |
| ENSMUSG000000084131 | 14302 Rpl3-ps2      |
| ENSMUSG000000107824 | 14303 RP23-14P17.4  |
| ENSMUSG000000087439 | 14304 Gm15788       |
| ENSMUSG000000086090 | 14305 Gm12531       |
| ENSMUSG000000072591 | 14306 5930412G12Rik |
| ENSMUSG000000022415 | 14307 Syngn1        |
| ENSMUSG000000108342 | 14308 RP23-174D7.3  |
| ENSMUSG000000098041 | 14309 Gm26981       |
| ENSMUSG000000017167 | 14310 Cntnap1       |
| ENSMUSG000000097645 | 14311 Gm26863       |
| ENSMUSG000000070527 | 14312 Mkrn3         |
| ENSMUSG000000066389 | 14313 Rpl31-ps1     |
| ENSMUSG000000108441 | 14314 RP24-549B12.4 |
| ENSMUSG000000022388 | 14315 Ttll8         |
| ENSMUSG000000030636 | 14316 1700010L04Rik |
| ENSMUSG000000042659 | 14317 Arrdc4        |
| ENSMUSG000000103905 | 14318 Gm34379       |
| ENSMUSG000000086177 | 14319 Gm14616       |
| ENSMUSG000000085893 | 14320 Gm12091       |

|                     |                     |
|---------------------|---------------------|
| ENSMUSG00000071291  | 14321 Zfp58         |
| ENSMUSG00000074280  | 14322 Gm6166        |
| ENSMUSG00000033987  | 14323 Dnah17        |
| ENSMUSG00000083220  | 14324 Gm12919       |
| ENSMUSG00000029727  | 14325 Cyp3a13       |
| ENSMUSG00000011751  | 14326 Sptbn4        |
| ENSMUSG00000039021  | 14327 Ttc16         |
| ENSMUSG00000024682  | 14328 Gif           |
| ENSMUSG00000037224  | 14329 Zfyve28       |
| ENSMUSG00000082151  | 14330 Gm11810       |
| ENSMUSG00000028647  | 14331 Mycbp         |
| ENSMUSG00000082669  | 14332 Gm5393        |
| ENSMUSG00000046688  | 14333 Tifa          |
| ENSMUSG00000021337  | 14334 Scgn          |
| ENSMUSG00000018238  | 14335 Gdf9          |
| ENSMUSG00000031480  | 14336 Thsd1         |
| ENSMUSG00000089959  | 14337 Gm16268       |
| ENSMUSG00000021598  | 14338 Med10         |
| ENSMUSG00000097742  | 14339 Gm26535       |
| ENSMUSG00000084081  | 14340 Gm12057       |
| ENSMUSG00000029843  | 14341 Slc13a4       |
| ENSMUSG00000051113  | 14342 Fam71e1       |
| ENSMUSG00000036395  | 14343 Glb1l2        |
| ENSMUSG00000056116  | 14344 H2-T22        |
| ENSMUSG000000102036 | 14345 1700063K16Rik |
| ENSMUSG00000084874  | 14346 Gm12906       |
| ENSMUSG00000078878  | 14347 Gm14305       |
| ENSMUSG000000106963 | 14348 Gm43297       |
| ENSMUSG00000051498  | 14349 Tlr6          |
| ENSMUSG00000083705  | 14350 Gm8624        |
| ENSMUSG00000096022  | 14351 Gm23421       |
| ENSMUSG00000026177  | 14352 Slc11a1       |
| ENSMUSG00000050296  | 14353 Abca12        |
| ENSMUSG000000103041 | 14354 Gm37305       |
| ENSMUSG00000083670  | 14355 Gm6829        |
| ENSMUSG00000084170  | 14356 Gm11954       |
| ENSMUSG00000074676  | 14357 Foxs1         |
| ENSMUSG00000026442  | 14358 Nfasc         |
| ENSMUSG00000066807  | 14359 Gm10179       |
| ENSMUSG00000024018  | 14360 Ccdc167       |
| ENSMUSG00000058934  | 14361 Igf1os        |
| ENSMUSG00000005774  | 14362 Rfx5          |

|                    |                     |
|--------------------|---------------------|
| ENSMUSG00000023918 | 14363 Adgrf4        |
| ENSMUSG00000081054 | 14364 Gm12025       |
| ENSMUSG00000081137 | 14365 BC022960      |
| ENSMUSG00000079852 | 14366 Klra4         |
| ENSMUSG00000070031 | 14367 Sp140         |
| ENSMUSG00000079346 | 14368 1700013D24Rik |
| ENSMUSG00000021055 | 14369 Esr2          |
| ENSMUSG00000085337 | 14370 Gm15964       |
| ENSMUSG00000058952 | 14371 Cfi           |
| ENSMUSG00000024039 | 14372 Cbs           |
| ENSMUSG00000100558 | 14373 1700025F24Rik |
| ENSMUSG00000103880 | 14374 Gm37009       |
| ENSMUSG00000018916 | 14375 Csf2          |
| ENSMUSG00000019737 | 14376 Syne4         |
| ENSMUSG00000065396 | 14377 Mir99b        |
| ENSMUSG00000102268 | 14378 Gm8826        |
| ENSMUSG00000105907 | 14379 Gm34333       |
| ENSMUSG00000075425 | 14380 Gm13547       |
| ENSMUSG00000031639 | 14381 Tlr3          |
| ENSMUSG00000015484 | 14382 Fam163a       |
| ENSMUSG00000083449 | 14383 Gm13487       |
| ENSMUSG00000078627 | 14384 March14       |
| ENSMUSG00000059741 | 14385 Myl3          |
| ENSMUSG00000053395 | 14386 Cacng8        |
| ENSMUSG00000032589 | 14387 Bsn           |
| ENSMUSG00000056772 | 14388 Rps6-ps2      |
| ENSMUSG00000089837 | 14389 Npcd          |
| ENSMUSG00000004552 | 14390 Ctse          |
| ENSMUSG00000030851 | 14391 Ldhc          |
| ENSMUSG00000108724 | 14392 RP23-32A8.6   |
| ENSMUSG00000070720 | 14393 Tmem200b      |
| ENSMUSG00000090907 | 14394 C030017D09Rik |
| ENSMUSG00000087006 | 14395 Gm13889       |
| ENSMUSG00000043993 | 14396 2900052L18Rik |
| ENSMUSG00000091020 | 14397 Gm5828        |
| ENSMUSG00000075502 | 14398 Kbtbd6        |
| ENSMUSG00000105779 | 14399 Gm6439        |
| ENSMUSG00000021069 | 14400 Pygl          |
| ENSMUSG00000078503 | 14401 Gm13225       |
| ENSMUSG00000098102 | 14402 Gm2467        |
| ENSMUSG00000043165 | 14403 Lor           |
| ENSMUSG00000103156 | 14404 Gm38293       |

|                     |                     |
|---------------------|---------------------|
| ENSMUSG00000032649  | 14405 Colgalt2      |
| ENSMUSG00000062794  | 14406 Zfp599        |
| ENSMUSG00000034037  | 14407 Fgd5          |
| ENSMUSG00000025359  | 14408 Pmel          |
| ENSMUSG00000010122  | 14409 Slc47a1       |
| ENSMUSG00000053877  | 14410 Srcap         |
| ENSMUSG00000030230  | 14411 Plcz1         |
| ENSMUSG000000104245 | 14412 Gm38155       |
| ENSMUSG00000097325  | 14413 Gm16897       |
| ENSMUSG00000037405  | 14414 Icam1         |
| ENSMUSG00000092417  | 14415 Gpank1        |
| ENSMUSG00000096448  | 14416 Gm5808        |
| ENSMUSG00000044320  | 14417 1700001O22Rik |
| ENSMUSG00000032744  | 14418 Heyl          |
| ENSMUSG00000057499  | 14419 Gm6177        |
| ENSMUSG00000034472  | 14420 Rasd2         |
| ENSMUSG00000081896  | 14421 Gm5389        |
| ENSMUSG00000046623  | 14422 Gjb4          |
| ENSMUSG00000095040  | 14423 1700001J03Rik |
| ENSMUSG00000092914  | 14424 Gm24084       |
| ENSMUSG00000017713  | 14425 Tha1          |
| ENSMUSG000000106271 | 14426 Gm43752       |
| ENSMUSG00000046329  | 14427 Slc25a23      |
| ENSMUSG00000022208  | 14428 Jph4          |
| ENSMUSG00000027656  | 14429 Wisp2         |
| ENSMUSG000000104695 | 14430 Gm30023       |
| ENSMUSG00000087095  | 14431 Emx2os        |
| ENSMUSG00000002012  | 14432 Pnck          |
| ENSMUSG00000094852  | 14433 Gm9034        |
| ENSMUSG00000025380  | 14434 Fscn2         |
| ENSMUSG000000104103 | 14435 Gm9517        |
| ENSMUSG00000025002  | 14436 Cyp2c55       |
| ENSMUSG00000003949  | 14437 Hlf           |
| ENSMUSG000000033361 | 14438 Prrg3         |
| ENSMUSG00000072601  | 14439 Ear1          |
| ENSMUSG000000108658 | 14440 RP24-74B24.4  |
| ENSMUSG00000097970  | 14441 Gm27028       |
| ENSMUSG00000082676  | 14442 Gm11843       |
| ENSMUSG00000033214  | 14443 Slitrk5       |
| ENSMUSG00000085558  | 14444 4930412C18Rik |
| ENSMUSG00000031376  | 14445 Atp2b3        |
| ENSMUSG00000087700  | 14446 Gm15283       |



|                     |                     |
|---------------------|---------------------|
| ENSMUSG00000097276  | 14447 4930525G20Rik |
| ENSMUSG00000052291  | 14448 5330438D12Rik |
| ENSMUSG00000071324  | 14449 Armc2         |
| ENSMUSG00000034422  | 14450 Parp14        |
| ENSMUSG00000040978  | 14451 Gm11992       |
| ENSMUSG00000043020  | 14452 Wdr63         |
| ENSMUSG000000104602 | 14453 Gm42779       |
| ENSMUSG000000107653 | 14454 RP23-346J12.1 |
| ENSMUSG00000022753  | 14455 Tmem30c       |
| ENSMUSG00000044645  | 14456 Gm7334        |
| ENSMUSG00000043857  | 14457 Mgat5b        |
| ENSMUSG000000107909 | 14458 RP24-441E15.4 |
| ENSMUSG00000026580  | 14459 Selp          |
| ENSMUSG00000036568  | 14460 Gltscr1l      |
| ENSMUSG00000040583  | 14461 Cyp2b13       |
| ENSMUSG00000038188  | 14462 Scarf1        |
| ENSMUSG00000030116  | 14463 Mfap5         |
| ENSMUSG00000099891  | 14464 Gm5575        |
| ENSMUSG00000034533  | 14465 Scn10a        |
| ENSMUSG00000090210  | 14466 Itga10        |
| ENSMUSG00000023033  | 14467 Scn8a         |
| ENSMUSG00000026840  | 14468 Lamc3         |
| ENSMUSG00000052981  | 14469 Ube2ql1       |
| ENSMUSG000000103011 | 14470 Gm8860        |
| ENSMUSG00000042345  | 14471 Ubash3a       |
| ENSMUSG00000097709  | 14472 2810429I04Rik |
| ENSMUSG00000072664  | 14473 Ugt3a1        |
| ENSMUSG00000097694  | 14474 G730013B05Rik |
| ENSMUSG00000091661  | 14475 Gm17021       |
| ENSMUSG00000069223  | 14476 4930451E10Rik |
| ENSMUSG00000085779  | 14477 Atcayos       |
| ENSMUSG00000021303  | 14478 Gng4          |
| ENSMUSG00000024232  | 14479 Bambi         |
| ENSMUSG00000029361  | 14480 Nos1          |
| ENSMUSG00000098056  | 14481 Gm8100        |
| ENSMUSG00000038352  | 14482 Arl5c         |
| ENSMUSG00000097848  | 14483 Gm807         |
| ENSMUSG00000087216  | 14484 E130111B04Rik |
| ENSMUSG000000102117 | 14485 Rpsa-ps1      |
| ENSMUSG00000093579  | 14486 Gm20036       |
| ENSMUSG00000085505  | 14487 Gm12868       |
| ENSMUSG00000018451  | 14488 6330403K07Rik |

|                    |                     |
|--------------------|---------------------|
| ENSMUSG00000031847 | 14489 1700030J22Rik |
| ENSMUSG00000100798 | 14490 Gm19589       |
| ENSMUSG00000098031 | 14491 Gm9341        |
| ENSMUSG00000019785 | 14492 Clvs2         |
| ENSMUSG00000072714 | 14493 Rpl21-ps4     |
| ENSMUSG00000022853 | 14494 Ehhadh        |
| ENSMUSG00000087378 | 14495 Gm12414       |
| ENSMUSG00000081161 | 14496 Gm12783       |
| ENSMUSG00000054161 | 14497 Fam83e        |
| ENSMUSG00000074384 | 14498 Al429214      |
| ENSMUSG00000029134 | 14499 Plb1          |
| ENSMUSG00000042216 | 14500 Sgsm1         |
| ENSMUSG00000052861 | 14501 Dnah6         |
| ENSMUSG00000057722 | 14502 Lepr          |
| ENSMUSG00000083864 | 14503 Gm13719       |
| ENSMUSG00000030532 | 14504 Hddc3         |
| ENSMUSG00000086547 | 14505 Gm11755       |
| ENSMUSG00000041642 | 14506 Kif21b        |
| ENSMUSG00000062472 | 14507 Gm4945        |
| ENSMUSG00000062393 | 14508 Dgkk          |
| ENSMUSG00000047604 | 14509 Frat2         |
| ENSMUSG00000026065 | 14510 Slc9a4        |
| ENSMUSG00000090036 | 14511 Gm15900       |
| ENSMUSG00000040569 | 14512 Slc26a7       |
| ENSMUSG00000101262 | 14513 Gm8326        |
| ENSMUSG00000068262 | 14514 Gm5879        |
| ENSMUSG00000031289 | 14515 Il13ra2       |
| ENSMUSG00000087689 | 14516 Gm15845       |
| ENSMUSG00000017830 | 14517 Dhx58         |
| ENSMUSG00000049093 | 14518 Il23r         |
| ENSMUSG00000083930 | 14519 Gm13042       |
| ENSMUSG00000028751 | 14520 Pla2g2e       |
| ENSMUSG00000048406 | 14521 B330016D10Rik |
| ENSMUSG00000048424 | 14522 Ranbp3l       |
| ENSMUSG00000035493 | 14523 Tgfb1         |
| ENSMUSG00000085776 | 14524 5430402O13Rik |
| ENSMUSG00000082107 | 14525 Gm16216       |
| ENSMUSG00000070984 | 14526 4930552N02Rik |
| ENSMUSG00000047565 | 14527 Acot10        |
| ENSMUSG00000033985 | 14528 Tesk2         |
| ENSMUSG00000041930 | 14529 Fam222a       |
| ENSMUSG00000071470 | 14530 Ccnb1ip1      |

|                    |                     |
|--------------------|---------------------|
| ENSMUSG00000006724 | 14531 Cyp27b1       |
| ENSMUSG00000107259 | 14532 Gm5298        |
| ENSMUSG00000032512 | 14533 Wdr48         |
| ENSMUSG00000079421 | 14534 4930402F06Rik |
| ENSMUSG00000021207 | 14535 Akr1c21       |
| ENSMUSG00000034792 | 14536 Gna15         |
| ENSMUSG00000031077 | 14537 Fadd          |
| ENSMUSG00000078639 | 14538 Gm12695       |
| ENSMUSG00000087034 | 14539 Cbfa2t2-ps1   |
| ENSMUSG00000004837 | 14540 Grap          |
| ENSMUSG00000097337 | 14541 Gm26606       |
| ENSMUSG00000001510 | 14542 Dlx3          |
| ENSMUSG00000090659 | 14543 Zfp493        |
| ENSMUSG00000027363 | 14544 Usp8          |
| ENSMUSG00000080870 | 14545 Gm14111       |
| ENSMUSG00000096308 | 14546 Gm14598       |
| ENSMUSG00000049928 | 14547 Glp2r         |
| ENSMUSG00000104418 | 14548 Gm37070       |
| ENSMUSG00000023737 | 14549 1700082M22Rik |
| ENSMUSG00000006345 | 14550 Ggt1          |
| ENSMUSG00000104195 | 14551 B230377A18Rik |
| ENSMUSG00000101502 | 14552 Rpl7a-ps10    |
| ENSMUSG00000006218 | 14553 Fam131c       |
| ENSMUSG00000066626 | 14554 Gm5121        |
| ENSMUSG00000020486 | 14555 4-Sep         |
| ENSMUSG00000056019 | 14556 Zfp709        |
| ENSMUSG00000082322 | 14557 Gm9164        |
| ENSMUSG00000107906 | 14558 Gm5580        |
| ENSMUSG00000088544 | 14559 Mir1945       |
| ENSMUSG00000103715 | 14560 4933431K14Rik |
| ENSMUSG00000069743 | 14561 Zfp820        |
| ENSMUSG00000075271 | 14562 Ttc30a1       |
| ENSMUSG00000018012 | 14563 Rac3          |
| ENSMUSG00000045886 | 14564 Gm9803        |
| ENSMUSG00000064063 | 14565 BC048507      |
| ENSMUSG00000043419 | 14566 Chd3os        |
| ENSMUSG00000029130 | 14567 Rnf32         |
| ENSMUSG00000099148 | 14568 Gm3331        |
| ENSMUSG00000031551 | 14569 Ido1          |
| ENSMUSG00000030056 | 14570 Isy1          |
| ENSMUSG00000096094 | 14571 A630095N17Rik |
| ENSMUSG00000107121 | 14572 1110006O24Rik |

|                     |                     |
|---------------------|---------------------|
| ENSMUSG00000083044  | 14573 Gm12416       |
| ENSMUSG00000107758  | 14574 RP23-326P16.3 |
| ENSMUSG00000049907  | 14575 Rasl11b       |
| ENSMUSG000000031698 | 14576 Mylk3         |
| ENSMUSG00000106891  | 14577 Gm43460       |
| ENSMUSG00000083055  | 14578 Gm14140       |
| ENSMUSG00000010529  | 14579 Gm266         |
| ENSMUSG00000047026  | 14580 Acsm4         |
| ENSMUSG00000020639  | 14581 Pfn4          |
| ENSMUSG00000108190  | 14582 RP23-62E15.1  |
| ENSMUSG00000028073  | 14583 Pear1         |
| ENSMUSG00000026312  | 14584 Cdh7          |
| ENSMUSG00000015850  | 14585 Adamtsl4      |
| ENSMUSG00000025997  | 14586 Ikzf2         |
| ENSMUSG00000046934  | 14587 Csl           |
| ENSMUSG000000033730 | 14588 Egr3          |
| ENSMUSG00000058183  | 14589 Mmel1         |
| ENSMUSG00000069376  | 14590 Gm5507        |
| ENSMUSG000000039328 | 14591 Rnf122        |
| ENSMUSG00000034799  | 14592 Unc13a        |
| ENSMUSG00000085027  | 14593 Gm11840       |
| ENSMUSG00000085704  | 14594 4921531C22Rik |
| ENSMUSG00000084345  | 14595 Rpl17-ps4     |
| ENSMUSG00000035095  | 14596 Fam167a       |
| ENSMUSG000000033857 | 14597 Engase        |
| ENSMUSG00000068263  | 14598 Efcc1         |
| ENSMUSG00000035576  | 14599 L3mbtl1       |
| ENSMUSG00000100108  | 14600 Gm28100       |
| ENSMUSG00000086736  | 14601 Gm14902       |
| ENSMUSG00000082092  | 14602 Gm14665       |
| ENSMUSG000000050930 | 14603 Map10         |
| ENSMUSG00000027068  | 14604 Dhrr9         |
| ENSMUSG00000059852  | 14605 Kcng2         |
| ENSMUSG000000031377 | 14606 Bmx           |
| ENSMUSG00000099384  | 14607 1700110C19Rik |
| ENSMUSG00000098190  | 14608 Gm5210        |
| ENSMUSG000000032845 | 14609 Alpk2         |
| ENSMUSG00000084772  | 14610 Gm15473       |
| ENSMUSG00000033255  | 14611 Gm5134        |
| ENSMUSG000000098115 | 14612 Gm8816        |
| ENSMUSG000000091764 | 14613 Zfp964        |
| ENSMUSG00000080998  | 14614 Gm5384        |

|                    |                      |
|--------------------|----------------------|
| ENSMUSG00000060807 | 14615 Serpina6       |
| ENSMUSG00000037921 | 14616 Ddx60          |
| ENSMUSG00000072295 | 14617 Als2cr11       |
| ENSMUSG00000022665 | 14618 Ccdc80         |
| ENSMUSG00000044707 | 14619 Ccnjl          |
| ENSMUSG00000002908 | 14620 Kcnn1          |
| ENSMUSG00000090996 | 14621 Gm20458        |
| ENSMUSG00000104083 | 14622 Gm29739        |
| ENSMUSG00000024430 | 14623 Cabyr          |
| ENSMUSG00000078618 | 14624 4930456L15Rik  |
| ENSMUSG00000108134 | 14625 RP23-227N23.15 |
| ENSMUSG00000040367 | 14626 Lrrd1          |
| ENSMUSG00000103115 | 14627 Gm37584        |
| ENSMUSG00000097339 | 14628 Gm26671        |
| ENSMUSG00000048655 | 14629 Ccdc169        |
| ENSMUSG00000105311 | 14630 RP23-214I6.5   |
| ENSMUSG00000024871 | 14631 Doc2g          |
| ENSMUSG00000022090 | 14632 Pdlim2         |
| ENSMUSG00000081740 | 14633 Gm14279        |
| ENSMUSG00000070345 | 14634 Hsf5           |
| ENSMUSG00000024774 | 14635 Ankrd22        |
| ENSMUSG00000104560 | 14636 Gm8115         |
| ENSMUSG00000015224 | 14637 Cyp2j9         |
| ENSMUSG00000106884 | 14638 Gm20156        |
| ENSMUSG00000087112 | 14639 Gm7237         |
| ENSMUSG00000034212 | 14640 Ankmy1         |
| ENSMUSG00000045004 | 14641 Spata21        |
| ENSMUSG00000051985 | 14642 Igfn1          |
| ENSMUSG00000042750 | 14643 Bex2           |
| ENSMUSG00000094189 | 14644 Gm6134         |
| ENSMUSG00000048965 | 14645 Mrgpre         |
| ENSMUSG00000022518 | 14646 4930562C15Rik  |
| ENSMUSG00000085735 | 14647 Mettl5os       |
| ENSMUSG00000106871 | 14648 Gm3289         |
| ENSMUSG00000097973 | 14649 Gm4929         |
| ENSMUSG00000084861 | 14650 1700095J07Rik  |
| ENSMUSG00000045362 | 14651 Tnfrsf26       |
| ENSMUSG00000090700 | 14652 Cyp4f40        |
| ENSMUSG00000090812 | 14653 Samd15         |
| ENSMUSG00000022099 | 14654 Dmtn           |
| ENSMUSG00000106028 | 14655 Gm8493         |
| ENSMUSG00000014158 | 14656 Trpv4          |

|                    |                     |
|--------------------|---------------------|
| ENSMUSG00000058975 | 14657 Kcnc1         |
| ENSMUSG00000082262 | 14658 Gm14730       |
| ENSMUSG00000006567 | 14659 Atp7b         |
| ENSMUSG00000043789 | 14660 Vwce          |
| ENSMUSG00000081362 | 14661 Cyp2j7        |
| ENSMUSG00000082091 | 14662 Gm13922       |
| ENSMUSG00000032023 | 14663 4931429I11Rik |
| ENSMUSG00000024866 | 14664 Acy3          |
| ENSMUSG00000045048 | 14665 Gm9795        |
| ENSMUSG00000023047 | 14666 Amhr2         |
| ENSMUSG00000101330 | 14667 Gm10193       |
| ENSMUSG00000100954 | 14668 Gm10138       |
| ENSMUSG00000097309 | 14669 Gm17249       |
| ENSMUSG00000042129 | 14670 Rassf4        |
| ENSMUSG00000031840 | 14671 Rab3a         |
| ENSMUSG00000103532 | 14672 Gm4430        |
| ENSMUSG00000091994 | 14673 E130317F20Rik |
| ENSMUSG00000020312 | 14674 Shc2          |
| ENSMUSG00000024173 | 14675 Tpsab1        |
| ENSMUSG00000096960 | 14676 A230028O05Rik |
| ENSMUSG00000027358 | 14677 Bmp2          |
| ENSMUSG00000029675 | 14678 Eln           |
| ENSMUSG00000027995 | 14679 Tlr2          |
| ENSMUSG00000056069 | 14680 Fam105a       |
| ENSMUSG00000104467 | 14681 Gm37660       |
| ENSMUSG00000021278 | 14682 Amn           |
| ENSMUSG00000020007 | 14683 Il20ra        |
| ENSMUSG00000085238 | 14684 4930479D17Rik |
| ENSMUSG00000083261 | 14685 Gm7816        |
| ENSMUSG00000093574 | 14686 Gm20671       |
| ENSMUSG00000030703 | 14687 Gdpd3         |
| ENSMUSG00000055172 | 14688 C1ra          |
| ENSMUSG00000056569 | 14689 Mpz           |
| ENSMUSG00000073233 | 14690 Gm9144        |
| ENSMUSG00000048040 | 14691 Arxes2        |
| ENSMUSG00000048481 | 14692 Mypop         |
| ENSMUSG00000027202 | 14693 Slc12a1       |
| ENSMUSG00000107736 | 14694 RP23-27C9.6   |
| ENSMUSG00000001029 | 14695 Icam2         |
| ENSMUSG00000083270 | 14696 Gm13498       |
| ENSMUSG00000069920 | 14697 B3gnt9        |
| ENSMUSG00000094790 | 14698 Gm6625        |

|                    |                     |
|--------------------|---------------------|
| ENSMUSG00000032718 | 14699 Mansc1        |
| ENSMUSG00000046408 | 14700 1700067K01Rik |
| ENSMUSG00000078902 | 14701 Gm14443       |
| ENSMUSG00000042647 | 14702 Acad12        |
| ENSMUSG00000107950 | 14703 RP23-421B1.2  |
| ENSMUSG00000084018 | 14704 Gm11895       |
| ENSMUSG00000037216 | 14705 Lipt1         |
| ENSMUSG00000080774 | 14706 Gm9143        |
| ENSMUSG00000081289 | 14707 Gm14857       |
| ENSMUSG00000044469 | 14708 Tnfai8l1      |
| ENSMUSG00000026712 | 14709 Mrc1          |
| ENSMUSG00000044921 | 14710 Rassf9        |
| ENSMUSG00000048126 | 14711 Col6a3        |
| ENSMUSG00000106793 | 14712 AL589742.2    |
| ENSMUSG00000097989 | 14713 Gm4335        |
| ENSMUSG00000029490 | 14714 Mfsd7a        |
| ENSMUSG00000082552 | 14715 Gm11850       |
| ENSMUSG00000066176 | 14716 Gm12511       |
| ENSMUSG00000059114 | 14717 Lrrc74a       |
| ENSMUSG00000097308 | 14718 Gm6410        |
| ENSMUSG00000029044 | 14719 4930584F24Rik |
| ENSMUSG00000020990 | 14720 Cdkl1         |
| ENSMUSG00000057103 | 14721 Cml1          |
| ENSMUSG00000097762 | 14722 4732463B04Rik |
| ENSMUSG00000045211 | 14723 Nudt18        |
| ENSMUSG00000081170 | 14724 Gm12922       |
| ENSMUSG00000060336 | 14725 Zfp937        |
| ENSMUSG00000000673 | 14726 Haao          |
| ENSMUSG00000028825 | 14727 Rhd           |
| ENSMUSG00000106820 | 14728 D5Ertd605e    |
| ENSMUSG00000101162 | 14729 Gm26728       |
| ENSMUSG00000093720 | 14730 Gm20635       |
| ENSMUSG00000055480 | 14731 Zfp458        |
| ENSMUSG00000094634 | 14732 Gm3468        |
| ENSMUSG00000097628 | 14733 Gm2383        |
| ENSMUSG00000097157 | 14734 Gm26512       |
| ENSMUSG00000028150 | 14735 Rorc          |
| ENSMUSG00000081123 | 14736 Gm11469       |
| ENSMUSG00000044835 | 14737 Ankrd45       |
| ENSMUSG00000070385 | 14738 Ampd1         |
| ENSMUSG00000050538 | 14739 B230217C12Rik |
| ENSMUSG00000086015 | 14740 4833417C18Rik |

|                     |                     |
|---------------------|---------------------|
| ENSMUSG00000108609  | 14741 RP23-361O12.5 |
| ENSMUSG00000038128  | 14742 Camk4         |
| ENSMUSG00000091849  | 14743 Gm17188       |
| ENSMUSG000000100555 | 14744 Gm8173        |
| ENSMUSG00000046317  | 14745 BC107364      |
| ENSMUSG00000027364  | 14746 Usp50         |
| ENSMUSG00000038623  | 14747 Tm6sf1        |
| ENSMUSG000000106928 | 14748 Gm43860       |
| ENSMUSG00000027505  | 14749 Fam209        |
| ENSMUSG00000039070  | 14750 Cpa4          |
| ENSMUSG00000078192  | 14751 Gm7290        |
| ENSMUSG00000081613  | 14752 Gm12109       |
| ENSMUSG00000039391  | 14753 Ccdc81        |
| ENSMUSG000000104862 | 14754 Gm6520        |
| ENSMUSG00000000303  | 14755 Cdh1          |
| ENSMUSG00000036192  | 14756 Rorb          |
| ENSMUSG00000086395  | 14757 A630014C17Rik |
| ENSMUSG00000038530  | 14758 Rgs4          |
| ENSMUSG00000045319  | 14759 Proser2       |
| ENSMUSG00000042417  | 14760 Ccno          |
| ENSMUSG00000030898  | 14761 Cckbr         |
| ENSMUSG00000037638  | 14762 Zbtb42        |
| ENSMUSG000000100017 | 14763 2410022M11Rik |
| ENSMUSG00000078097  | 14764 Gm10913       |
| ENSMUSG00000082474  | 14765 Gm8213        |
| ENSMUSG00000086728  | 14766 Man2c1os      |
| ENSMUSG00000029522  | 14767 Pla2g1b       |
| ENSMUSG00000081285  | 14768 Gm18859       |
| ENSMUSG00000096967  | 14769 Gm26621       |
| ENSMUSG00000038295  | 14770 Atg9b         |
| ENSMUSG000000100702 | 14771 Gm8976        |
| ENSMUSG00000082626  | 14772 Rps13-ps5     |
| ENSMUSG00000024990  | 14773 Rbp4          |
| ENSMUSG000000102048 | 14774 Gm6075        |
| ENSMUSG00000064658  | 14775 Gm24166       |
| ENSMUSG00000048003  | 14776 Catsper4      |
| ENSMUSG00000081833  | 14777 Gm13669       |
| ENSMUSG000000103034 | 14778 Gm8797        |
| ENSMUSG00000071202  | 14779 Ccdc78        |
| ENSMUSG00000084216  | 14780 Gm7973        |
| ENSMUSG00000093622  | 14781 Gm20703       |
| ENSMUSG00000055994  | 14782 Nod2          |



|                    |                     |
|--------------------|---------------------|
| ENSMUSG00000039653 | 14783 Baat          |
| ENSMUSG00000081002 | 14784 Gm14240       |
| ENSMUSG00000006014 | 14785 Prg4          |
| ENSMUSG00000007594 | 14786 Hapln4        |
| ENSMUSG00000097045 | 14787 Gm26641       |
| ENSMUSG00000050511 | 14788 Oprd1         |
| ENSMUSG00000107026 | 14789 Gm7504        |
| ENSMUSG00000097360 | 14790 9430065F17Rik |
| ENSMUSG00000025213 | 14791 Kazald1       |
| ENSMUSG00000090607 | 14792 Gm17052       |
| ENSMUSG00000089901 | 14793 Gm8113        |
| ENSMUSG00000097345 | 14794 AA543186      |
| ENSMUSG00000062960 | 14795 Kdr           |
| ENSMUSG00000050640 | 14796 Tmem150c      |
| ENSMUSG00000043670 | 14797 Diras1        |
| ENSMUSG00000031170 | 14798 Slc38a5       |
| ENSMUSG00000053158 | 14799 Fes           |
| ENSMUSG00000103510 | 14800 Gm30725       |
| ENSMUSG00000047420 | 14801 Fam180a       |
| ENSMUSG00000045027 | 14802 Prss22        |
| ENSMUSG00000097121 | 14803 D130020L05Rik |
| ENSMUSG00000097793 | 14804 Gm17259       |
| ENSMUSG00000082383 | 14805 Gm9670        |
| ENSMUSG00000030877 | 14806 4933427G17Rik |
| ENSMUSG00000027849 | 14807 Syt6          |
| ENSMUSG00000097346 | 14808 Gm26619       |
| ENSMUSG00000098274 | 14809 Rpl24         |
| ENSMUSG00000080865 | 14810 Eif1-ps3      |
| ENSMUSG00000100480 | 14811 Gm29156       |
| ENSMUSG00000090773 | 14812 Vmn2r-ps69    |
| ENSMUSG00000032268 | 14813 Tmprss5       |
| ENSMUSG00000020335 | 14814 Zfp354b       |
| ENSMUSG00000035923 | 14815 Myf6          |
| ENSMUSG00000049971 | 14816 Glt1d1        |
| ENSMUSG00000103827 | 14817 Gm32950       |
| ENSMUSG00000029321 | 14818 Slc10a6       |
| ENSMUSG00000098549 | 14819 Gm5269        |
| ENSMUSG00000038765 | 14820 Lmx1b         |
| ENSMUSG00000082741 | 14821 Gm9703        |
| ENSMUSG00000105865 | 14822 Gm34144       |
| ENSMUSG00000071229 | 14823 Timm8a2       |
| ENSMUSG00000084893 | 14824 Hba-ps4       |

|                    |                     |
|--------------------|---------------------|
| ENSMUSG00000085763 | 14825 Smc2os        |
| ENSMUSG00000095398 | 14826 Gm16404       |
| ENSMUSG00000051279 | 14827 Gdf6          |
| ENSMUSG00000085913 | 14828 Gm15601       |
| ENSMUSG00000014198 | 14829 Zfp385c       |
| ENSMUSG00000027375 | 14830 Mal           |
| ENSMUSG00000097110 | 14831 Gm26726       |
| ENSMUSG00000022479 | 14832 Vdr           |
| ENSMUSG00000068522 | 14833 Aard          |
| ENSMUSG00000062778 | 14834 Chia1         |
| ENSMUSG00000101037 | 14835 Gm28424       |
| ENSMUSG00000092399 | 14836 4930556N13Rik |
| ENSMUSG00000081394 | 14837 Gm13215       |
| ENSMUSG00000025650 | 14838 Col7a1        |
| ENSMUSG00000082874 | 14839 Rpl15-ps1     |
| ENSMUSG00000050050 | 14840 Ccdc158       |
| ENSMUSG00000107096 | 14841 Gm43597       |
| ENSMUSG00000036123 | 14842 Slc9a3        |
| ENSMUSG00000083940 | 14843 Gm11298       |
| ENSMUSG00000064065 | 14844 Ipcef1        |
| ENSMUSG00000097766 | 14845 5730420D15Rik |
| ENSMUSG00000073073 | 14846 Gm8098        |
| ENSMUSG00000036186 | 14847 Fam69b        |
| ENSMUSG00000031861 | 14848 Lpar2         |
| ENSMUSG00000025839 | 14849 Pramel7       |
| ENSMUSG00000103668 | 14850 Gm38186       |
| ENSMUSG00000104360 | 14851 Gm8762        |
| ENSMUSG00000087190 | 14852 D430001F17Rik |
| ENSMUSG00000055523 | 14853 Gucy2g        |
| ENSMUSG00000045573 | 14854 Penk          |
| ENSMUSG00000029120 | 14855 Ppp2r2c       |
| ENSMUSG00000015134 | 14856 Aldh1a3       |
| ENSMUSG00000060566 | 14857 Rpl21-ps3     |
| ENSMUSG00000050567 | 14858 Maml1         |
| ENSMUSG00000001632 | 14859 Brpf1         |
| ENSMUSG00000084006 | 14860 Gm14245       |
| ENSMUSG00000051499 | 14861 Zfp786        |
| ENSMUSG00000082961 | 14862 Gm15131       |
| ENSMUSG00000015879 | 14863 Fam184b       |
| ENSMUSG00000037348 | 14864 Paqr7         |
| ENSMUSG00000037169 | 14865 Mycn          |
| ENSMUSG00000021567 | 14866 Nkd2          |

|                    |                     |
|--------------------|---------------------|
| ENSMUSG00000098035 | 14867 Gm5335        |
| ENSMUSG00000063804 | 14868 Lin28b        |
| ENSMUSG00000107771 | 14869 RP23-407F20.1 |
| ENSMUSG00000083815 | 14870 Gm13435       |
| ENSMUSG00000026175 | 14871 Vil1          |
| ENSMUSG00000072594 | 14872 Gm16439       |
| ENSMUSG00000086806 | 14873 Gm13054       |
| ENSMUSG00000083338 | 14874 Gm12475       |
| ENSMUSG00000029061 | 14875 Mmp23         |
| ENSMUSG00000106874 | 14876 Gm20186       |
| ENSMUSG00000098138 | 14877 Gm9081        |
| ENSMUSG00000057751 | 14878 Megf6         |
| ENSMUSG00000081877 | 14879 Gm8858        |
| ENSMUSG00000033579 | 14880 Fa2h          |
| ENSMUSG00000098506 | 14881 Phf20-ps      |
| ENSMUSG00000093816 | 14882 Gm26445       |
| ENSMUSG00000105518 | 14883 Gm42674       |
| ENSMUSG00000108496 | 14884 RP23-402P24.8 |
| ENSMUSG00000030244 | 14885 Gys2          |
| ENSMUSG00000026090 | 14886 2010300C02Rik |
| ENSMUSG00000079386 | 14887 Gm3173        |
| ENSMUSG00000022658 | 14888 Tagln3        |
| ENSMUSG00000061259 | 14889 Tmprss11d     |
| ENSMUSG00000086369 | 14890 E330017L17Rik |
| ENSMUSG00000098371 | 14891 Gm28037       |
| ENSMUSG00000021508 | 14892 Cxcl14        |
| ENSMUSG00000072847 | 14893 A530017D24Rik |
| ENSMUSG00000022053 | 14894 Ebf2          |
| ENSMUSG00000096981 | 14895 Gm16845       |
| ENSMUSG00000092353 | 14896 Gm20539       |
| ENSMUSG00000062017 | 14897 Abca14        |
| ENSMUSG00000027744 | 14898 Stoml3        |
| ENSMUSG00000007805 | 14899 Twist2        |
| ENSMUSG00000092586 | 14900 Ly6g6c        |
| ENSMUSG00000041633 | 14901 Kctd12b       |
| ENSMUSG00000030032 | 14902 Wdr54         |
| ENSMUSG00000070291 | 14903 Ddx43         |
| ENSMUSG00000084333 | 14904 Gm11599       |
| ENSMUSG00000084301 | 14905 Gm7856        |
| ENSMUSG00000053263 | 14906 Gm12592       |
| ENSMUSG00000048330 | 14907 Ric3          |
| ENSMUSG00000082157 | 14908 Gm12038       |

|                    |                     |
|--------------------|---------------------|
| ENSMUSG00000084910 | 14909 C630043F03Rik |
| ENSMUSG00000020542 | 14910 Myocd         |
| ENSMUSG00000108175 | 14911 RP23-446E21.5 |
| ENSMUSG00000036862 | 14912 Dchs1         |
| ENSMUSG00000082061 | 14913 Gm12726       |
| ENSMUSG00000028758 | 14914 Kif17         |
| ENSMUSG00000086826 | 14915 Gm11739       |
| ENSMUSG00000018126 | 14916 Baiap2l2      |
| ENSMUSG00000083507 | 14917 Gm12842       |
| ENSMUSG00000072589 | 14918 Gm10371       |
| ENSMUSG00000106159 | 14919 Gm31211       |
| ENSMUSG00000071102 | 14920 Gm10313       |
| ENSMUSG00000022871 | 14921 Fetub         |
| ENSMUSG00000045934 | 14922 Mtmr11        |
| ENSMUSG00000084968 | 14923 Gm12743       |
| ENSMUSG00000040963 | 14924 Asgr2         |
| ENSMUSG00000045664 | 14925 Cdc42ep2      |
| ENSMUSG00000099590 | 14926 C330022C24Rik |
| ENSMUSG00000047686 | 14927 Zcchc5        |
| ENSMUSG00000096225 | 14928 Lhx8          |
| ENSMUSG00000081791 | 14929 Gm12190       |
| ENSMUSG00000082641 | 14930 Rpl30-ps5     |
| ENSMUSG00000103622 | 14931 Gm38391       |
| ENSMUSG00000106978 | 14932 N4bp2os       |
| ENSMUSG00000082877 | 14933 Gm13009       |
| ENSMUSG00000098208 | 14934 Gm8349        |
| ENSMUSG00000074625 | 14935 Arhgap40      |
| ENSMUSG00000084031 | 14936 Gm7416        |
| ENSMUSG00000100437 | 14937 Gm29152       |
| ENSMUSG00000083320 | 14938 Gm13935       |
| ENSMUSG00000028280 | 14939 Gabrr1        |
| ENSMUSG00000108740 | 14940 RP24-246N21.2 |
| ENSMUSG00000107462 | 14941 RP23-97L11.3  |
| ENSMUSG00000031329 | 14942 Tsx           |
| ENSMUSG00000086443 | 14943 4933421A08Rik |
| ENSMUSG00000034825 | 14944 Nrip3         |
| ENSMUSG00000027719 | 14945 Adad1         |
| ENSMUSG00000094152 | 14946 Slc6a16       |
| ENSMUSG00000085568 | 14947 Gm14858       |
| ENSMUSG00000024210 | 14948 Ip6k3         |
| ENSMUSG00000067203 | 14949 H2-K2         |
| ENSMUSG00000083431 | 14950 Gm13437       |

|                    |                     |
|--------------------|---------------------|
| ENSMUSG00000105734 | 14951 4930558C23Rik |
| ENSMUSG00000043873 | 14952 Chil5         |
| ENSMUSG00000024610 | 14953 Cd74          |
| ENSMUSG00000003934 | 14954 Efnb3         |
| ENSMUSG00000042428 | 14955 Mgat3         |
| ENSMUSG00000082510 | 14956 Gm11793       |
| ENSMUSG00000105765 | 14957 4930539C22Rik |
| ENSMUSG00000003418 | 14958 St8sia6       |
| ENSMUSG00000100157 | 14959 2310034O05Rik |
| ENSMUSG00000072791 | 14960 Abcb5         |
| ENSMUSG00000087196 | 14961 Gm13373       |
| ENSMUSG00000069308 | 14962 Hist1h2bp     |
| ENSMUSG00000024552 | 14963 Slc14a2       |
| ENSMUSG00000003379 | 14964 Cd79a         |
| ENSMUSG00000020331 | 14965 Hcn2          |
| ENSMUSG00000082588 | 14966 Gm15443       |
| ENSMUSG00000059383 | 14967 Gfral         |
| ENSMUSG00000035566 | 14968 Pcdh17        |
| ENSMUSG00000029410 | 14969 Ppef2         |
| ENSMUSG00000104514 | 14970 Gm37164       |
| ENSMUSG00000081797 | 14971 Gm8662        |
| ENSMUSG00000086404 | 14972 Gm6787        |
| ENSMUSG00000097032 | 14973 4930539J05Rik |
| ENSMUSG00000094191 | 14974 Rpl31-ps14    |
| ENSMUSG00000085218 | 14975 BB218582      |
| ENSMUSG00000105837 | 14976 Gm35986       |
| ENSMUSG00000091668 | 14977 Gm8358        |
| ENSMUSG00000034145 | 14978 Tmem63c       |
| ENSMUSG00000082296 | 14979 Gm11450       |
| ENSMUSG00000030270 | 14980 Cpne9         |
| ENSMUSG00000091003 | 14981 Gm7244        |
| ENSMUSG00000102162 | 14982 Gm2367        |
| ENSMUSG00000046618 | 14983 Olfml2a       |
| ENSMUSG00000022456 | 14984 3-Sep         |
| ENSMUSG00000085398 | 14985 4931406G06Rik |
| ENSMUSG00000081004 | 14986 Gm9157        |
| ENSMUSG00000026471 | 14987 Mr1           |
| ENSMUSG00000074978 | 14988 Actg-ps1      |
| ENSMUSG00000029352 | 14989 Crybb3        |
| ENSMUSG00000080994 | 14990 Gm13464       |
| ENSMUSG00000022432 | 14991 Smc1b         |
| ENSMUSG00000008482 | 14992 Rnf151        |

|                    |                     |
|--------------------|---------------------|
| ENSMUSG00000026163 | 14993 Sphkap        |
| ENSMUSG00000106803 | 14994 Gm8930        |
| ENSMUSG00000081834 | 14995 Gm13770       |
| ENSMUSG00000045455 | 14996 Gm9797        |
| ENSMUSG00000097946 | 14997 Gm8343        |
| ENSMUSG00000073758 | 14998 Sh3d21        |
| ENSMUSG00000106455 | 14999 Gm5711        |
| ENSMUSG00000092593 | 15000 Gm20492       |
| ENSMUSG00000083915 | 15001 Gm13932       |
| ENSMUSG00000075581 | 15002 Gm16409       |
| ENSMUSG00000105509 | 15003 C130013H08Rik |
| ENSMUSG00000102112 | 15004 1810041H14Rik |
| ENSMUSG00000056258 | 15005 Kcnq3         |
| ENSMUSG00000019775 | 15006 Rgs17         |
| ENSMUSG00000044701 | 15007 Il27          |
| ENSMUSG00000029420 | 15008 Rimbp2        |
| ENSMUSG00000074136 | 15009 4930513N10Rik |
| ENSMUSG00000022847 | 15010 Thpo          |
| ENSMUSG00000091269 | 15011 Gm6682        |
| ENSMUSG00000071715 | 15012 Ncf4          |
| ENSMUSG00000107257 | 15013 Gm43028       |
| ENSMUSG00000056877 | 15014 Rps15a-ps1    |
| ENSMUSG00000021700 | 15015 Rab3c         |
| ENSMUSG00000021071 | 15016 Trim9         |
| ENSMUSG00000067356 | 15017 B430203G13Rik |
| ENSMUSG00000108224 | 15018 RP23-16B4.1   |
| ENSMUSG00000031073 | 15019 Fgf15         |
| ENSMUSG00000085022 | 15020 Gm5860        |
| ENSMUSG00000070604 | 15021 Vsig10l       |
| ENSMUSG00000044787 | 15022 Spata32       |
| ENSMUSG00000008999 | 15023 Bmp7          |
| ENSMUSG00000074505 | 15024 Fat3          |
| ENSMUSG00000092604 | 15025 Gm20508       |
| ENSMUSG00000027716 | 15026 Trpc3         |
| ENSMUSG00000017639 | 15027 Rab11fip4     |
| ENSMUSG00000005672 | 15028 Kit           |
| ENSMUSG00000103983 | 15029 Gm20045       |
| ENSMUSG00000092269 | 15030 Gm9577        |
| ENSMUSG00000097026 | 15031 Gm26786       |
| ENSMUSG00000086715 | 15032 B230112J18Rik |
| ENSMUSG00000063021 | 15033 Hist1h2ak     |
| ENSMUSG00000104314 | 15034 Gm37907       |

|                    |                     |
|--------------------|---------------------|
| ENSMUSG00000050919 | 15035 Zfp366        |
| ENSMUSG00000085601 | 15036 Gm4969        |
| ENSMUSG00000108396 | 15037 RP23-478L20.1 |
| ENSMUSG00000100599 | 15038 1700120C14Rik |
| ENSMUSG00000050138 | 15039 Kcnk12        |
| ENSMUSG00000078486 | 15040 Perm1         |
| ENSMUSG00000069986 | 15041 Gm8054        |
| ENSMUSG00000032360 | 15042 Hcrtr2        |
| ENSMUSG00000089992 | 15043 G6pd2         |
| ENSMUSG00000058700 | 15044 Gm8724        |
| ENSMUSG00000041445 | 15045 Mmrn2         |
| ENSMUSG00000031389 | 15046 Arhgap4       |
| ENSMUSG00000020264 | 15047 Slc36a2       |
| ENSMUSG00000064802 | 15048 Gm24036       |
| ENSMUSG00000085898 | 15049 Gm6689        |
| ENSMUSG00000108366 | 15050 RP24-490A22.9 |
| ENSMUSG00000081568 | 15051 Gm15032       |
| ENSMUSG00000085010 | 15052 Gssos1        |
| ENSMUSG00000083649 | 15053 Rasl2-9       |
| ENSMUSG00000092009 | 15054 Myh15         |
| ENSMUSG00000062152 | 15055 Rpl21-ps14    |
| ENSMUSG00000080932 | 15056 Gm10224       |
| ENSMUSG00000108379 | 15057 RP23-370I17.3 |
| ENSMUSG00000081540 | 15058 Gm12538       |
| ENSMUSG00000020872 | 15059 Tac4          |
| ENSMUSG00000048617 | 15060 Rtbdn         |
| ENSMUSG00000082836 | 15061 Gm13612       |
| ENSMUSG00000020297 | 15062 Nsg2          |
| ENSMUSG00000079137 | 15063 Rpl27-ps1     |
| ENSMUSG00000025401 | 15064 Myo1a         |
| ENSMUSG00000036634 | 15065 Mag           |
| ENSMUSG00000042514 | 15066 Klhl14        |
| ENSMUSG00000086324 | 15067 Gm15564       |
| ENSMUSG00000039154 | 15068 Shd           |
| ENSMUSG00000104003 | 15069 Gm42414       |
| ENSMUSG00000103898 | 15070 Gm30238       |
| ENSMUSG00000057370 | 15071 Rpl21-ps12    |
| ENSMUSG00000043807 | 15072 Ly6g5b        |
| ENSMUSG00000090061 | 15073 Nwd2          |
| ENSMUSG00000081173 | 15074 Gm13500       |
| ENSMUSG00000052482 | 15075 Gm8174        |
| ENSMUSG00000084158 | 15076 Gm14652       |

|                     |                     |
|---------------------|---------------------|
| ENSMUSG00000053199  | 15077 Arhgap20      |
| ENSMUSG00000001901  | 15078 Kcnh6         |
| ENSMUSG00000001773  | 15079 Folh1         |
| ENSMUSG000000083112 | 15080 Gm14620       |
| ENSMUSG000000068323 | 15081 Slc4a5        |
| ENSMUSG000000039193 | 15082 Nlrc4         |
| ENSMUSG000000022015 | 15083 Tnfsf11       |
| ENSMUSG000000092021 | 15084 Gbp11         |
| ENSMUSG000000057244 | 15085 Gm6139        |
| ENSMUSG000000100819 | 15086 Gm2693        |
| ENSMUSG000000081263 | 15087 Gm14859       |
| ENSMUSG000000083049 | 15088 Gm14822       |
| ENSMUSG000000106190 | 15089 Gm20768       |
| ENSMUSG000000073427 | 15090 Gm4924        |
| ENSMUSG000000015966 | 15091 Il17rb        |
| ENSMUSG000000097713 | 15092 Gm7741        |
| ENSMUSG000000025355 | 15093 Mmp19         |
| ENSMUSG000000046338 | 15094 Gpat2         |
| ENSMUSG000000051037 | 15095 Zfp455        |
| ENSMUSG000000098070 | 15096 Gm8609        |
| ENSMUSG000000106317 | 15097 Gm43848       |
| ENSMUSG000000039179 | 15098 Tekt5         |
| ENSMUSG000000102246 | 15099 9430037013Rik |
| ENSMUSG000000105047 | 15100 Gm42533       |
| ENSMUSG000000106925 | 15101 Gm20072       |
| ENSMUSG000000024670 | 15102 Cd6           |
| ENSMUSG000000108438 | 15103 RP23-74K24.5  |
| ENSMUSG000000024401 | 15104 Tnf           |
| ENSMUSG000000024300 | 15105 Myo1f         |
| ENSMUSG000000097298 | 15106 A130057D12Rik |
| ENSMUSG000000098076 | 15107 Gm6981        |
| ENSMUSG000000041797 | 15108 Abca9         |
| ENSMUSG000000029248 | 15109 Thegl         |
| ENSMUSG000000031022 | 15110 BC051019      |
| ENSMUSG000000108294 | 15111 RP23-77B7.1   |
| ENSMUSG000000028005 | 15112 Gucy1b3       |
| ENSMUSG000000002791 | 15113 Pdxk-ps       |
| ENSMUSG000000086205 | 15114 Gm12679       |
| ENSMUSG000000029442 | 15115 Wdr66         |
| ENSMUSG000000040714 | 15116 Klc3          |
| ENSMUSG000000043541 | 15117 Casc1         |
| ENSMUSG000000067370 | 15118 B3galt4       |



|                    |                     |
|--------------------|---------------------|
| ENSMUSG00000099980 | 15119 Gm5619        |
| ENSMUSG00000087222 | 15120 E030042O20Rik |
| ENSMUSG00000025784 | 15121 Clec3b        |
| ENSMUSG00000049538 | 15122 Adamts16      |
| ENSMUSG00000027996 | 15123 Sfrp2         |
| ENSMUSG00000090417 | 15124 Vmn2r94       |
| ENSMUSG00000080711 | 15125 Gm11686       |
| ENSMUSG00000035875 | 15126 Al182371      |
| ENSMUSG00000096727 | 15127 Psmb9         |
| ENSMUSG00000082953 | 15128 Gm13217       |
| ENSMUSG00000016529 | 15129 Il10          |
| ENSMUSG00000081660 | 15130 Gm11787       |
| ENSMUSG00000048148 | 15131 Nwd1          |
| ENSMUSG00000029477 | 15132 Morn3         |
| ENSMUSG00000030108 | 15133 Slc6a13       |
| ENSMUSG00000040276 | 15134 Pacsin1       |
| ENSMUSG00000091089 | 15135 A930018M24Rik |
| ENSMUSG00000084332 | 15136 Gm8840        |
| ENSMUSG00000043099 | 15137 Hic1          |
| ENSMUSG00000042817 | 15138 Flt3          |
| ENSMUSG00000097736 | 15139 9530059O14Rik |
| ENSMUSG00000093405 | 15140 Gm20684       |
| ENSMUSG00000057137 | 15141 Tmem140       |
| ENSMUSG00000028785 | 15142 Hpca          |
| ENSMUSG00000069855 | 15143 Slc47a2       |
| ENSMUSG00000086229 | 15144 Gm4887        |
| ENSMUSG00000023393 | 15145 Slc17a9       |
| ENSMUSG00000006154 | 15146 Eps8l1        |
| ENSMUSG00000001520 | 15147 Nrip2         |
| ENSMUSG00000050974 | 15148 Gm9847        |
| ENSMUSG00000056656 | 15149 Apol8         |
| ENSMUSG00000030340 | 15150 Scnn1a        |
| ENSMUSG00000100178 | 15151 Gm5267        |
| ENSMUSG00000032245 | 15152 Cln6          |
| ENSMUSG00000106885 | 15153 Eif3s6-ps4    |
| ENSMUSG00000019235 | 15154 Rps6kl1       |
| ENSMUSG00000082789 | 15155 Gm13284       |
| ENSMUSG00000099528 | 15156 2410012E07Rik |
| ENSMUSG00000086212 | 15157 Mkl1os        |
| ENSMUSG00000022211 | 15158 Lrrc16b       |
| ENSMUSG00000105077 | 15159 Gm4859        |
| ENSMUSG00000086929 | 15160 Gm11788       |

|                    |                     |
|--------------------|---------------------|
| ENSMUSG00000084925 | 15161 1810062O18Rik |
| ENSMUSG00000019935 | 15162 Slc17a8       |
| ENSMUSG00000082016 | 15163 Pgam1-ps2     |
| ENSMUSG00000019853 | 15164 Hebp2         |
| ENSMUSG00000085261 | 15165 Gm13814       |
| ENSMUSG00000087278 | 15166 A930006I01Rik |
| ENSMUSG00000084007 | 15167 Gm9003        |
| ENSMUSG00000031981 | 15168 Capn9         |
| ENSMUSG00000086413 | 15169 Gm12415       |
| ENSMUSG00000025185 | 15170 Loxl4         |
| ENSMUSG00000046683 | 15171 0610025J13Rik |
| ENSMUSG00000085185 | 15172 BC028777      |
| ENSMUSG00000063919 | 15173 Srrm4         |
| ENSMUSG00000027824 | 15174 Vmn2r1        |
| ENSMUSG00000058258 | 15175 Idi1          |
| ENSMUSG00000022809 | 15176 Nr1i2         |
| ENSMUSG00000041293 | 15177 Adgrf1        |
| ENSMUSG00000074771 | 15178 Ankef1        |
| ENSMUSG00000097365 | 15179 C030034L19Rik |
| ENSMUSG00000035878 | 15180 Hykk          |
| ENSMUSG00000055341 | 15181 Zfp457        |
| ENSMUSG00000097320 | 15182 Tmem147os     |
| ENSMUSG00000101556 | 15183 Gm28869       |
| ENSMUSG00000039457 | 15184 Ppl           |
| ENSMUSG00000019851 | 15185 Perp          |
| ENSMUSG00000022683 | 15186 Pla2g10       |
| ENSMUSG00000020848 | 15187 Doc2b         |
| ENSMUSG00000030921 | 15188 Trim30a       |
| ENSMUSG00000057176 | 15189 Gm166         |
| ENSMUSG00000037813 | 15190 D630003M21Rik |
| ENSMUSG00000031966 | 15191 Glb1l3        |
| ENSMUSG00000074577 | 15192 Fam65c        |
| ENSMUSG00000057719 | 15193 Sh3rf2        |
| ENSMUSG00000031340 | 15194 Gabre         |
| ENSMUSG00000082165 | 15195 Gm7091        |
| ENSMUSG00000108813 | 15196 RP23-402P24.9 |
| ENSMUSG00000095710 | 15197 Gm8871        |
| ENSMUSG00000093484 | 15198 Gm20657       |
| ENSMUSG00000082193 | 15199 Rpl5-ps1      |
| ENSMUSG00000030549 | 15200 Rhcg          |
| ENSMUSG00000103486 | 15201 Gm10657       |
| ENSMUSG00000092240 | 15202 Gm4246        |

|                     |                     |
|---------------------|---------------------|
| ENSMUSG00000044551  | 15203 9930012K11Rik |
| ENSMUSG00000051067  | 15204 Lingo3        |
| ENSMUSG00000072679  | 15205 D6Ertd474e    |
| ENSMUSG00000003283  | 15206 Hck           |
| ENSMUSG00000099747  | 15207 1700025K24Rik |
| ENSMUSG00000098923  | 15208 Tmem185b      |
| ENSMUSG00000060212  | 15209 Pcnxl2        |
| ENSMUSG00000106217  | 15210 Gm43368       |
| ENSMUSG00000097503  | 15211 3110045C21Rik |
| ENSMUSG00000018920  | 15212 Cxcl16        |
| ENSMUSG00000063765  | 15213 Chadl         |
| ENSMUSG00000085515  | 15214 C630028M04Rik |
| ENSMUSG00000029084  | 15215 Cd38          |
| ENSMUSG00000015452  | 15216 Ager          |
| ENSMUSG00000025207  | 15217 Sema4g        |
| ENSMUSG00000090799  | 15218 Khlh33        |
| ENSMUSG00000086632  | 15219 1700112J05Rik |
| ENSMUSG00000085278  | 15220 Gm12841       |
| ENSMUSG000000104777 | 15221 Gm4865        |
| ENSMUSG00000032394  | 15222 Igdcc3        |
| ENSMUSG00000027335  | 15223 Adra1d        |
| ENSMUSG00000045613  | 15224 Chrm2         |
| ENSMUSG00000045031  | 15225 Cetn4         |
| ENSMUSG000000100235 | 15226 Gm28557       |
| ENSMUSG00000028100  | 15227 Nudt17        |
| ENSMUSG00000029211  | 15228 Gabra4        |
| ENSMUSG00000090881  | 15229 Gm6904        |
| ENSMUSG000000107941 | 15230 RP23-97D19.1  |
| ENSMUSG00000040280  | 15231 Ndufa4l2      |
| ENSMUSG00000050533  | 15232 Gm9845        |
| ENSMUSG00000074284  | 15233 Gm10658       |
| ENSMUSG00000031737  | 15234 Irx5          |
| ENSMUSG00000002111  | 15235 Spi1          |
| ENSMUSG00000030345  | 15236 Dyrk4         |
| ENSMUSG00000051076  | 15237 Vtcn1         |
| ENSMUSG00000070476  | 15238 Fam217b       |
| ENSMUSG000000104166 | 15239 Gm38247       |
| ENSMUSG00000098008  | 15240 A930001A20Rik |
| ENSMUSG00000037962  | 15241 Fam101a       |
| ENSMUSG00000068604  | 15242 Gm8225        |
| ENSMUSG00000097958  | 15243 Gm8492        |
| ENSMUSG00000090273  | 15244 Prr22         |

|                    |                     |
|--------------------|---------------------|
| ENSMUSG00000020080 | 15245 Hkdc1         |
| ENSMUSG00000086716 | 15246 Gm11629       |
| ENSMUSG00000106895 | 15247 Gm4754        |
| ENSMUSG00000030124 | 15248 Lag3          |
| ENSMUSG00000056055 | 15249 Sag           |
| ENSMUSG00000081436 | 15250 Gm5912        |
| ENSMUSG00000020447 | 15251 Npc1l1        |
| ENSMUSG00000037709 | 15252 Fam13a        |
| ENSMUSG00000028782 | 15253 Adgrb2        |
| ENSMUSG00000087121 | 15254 Gm7847        |
| ENSMUSG00000097350 | 15255 4732491K20Rik |
| ENSMUSG00000108511 | 15256 RP23-133N24.2 |
| ENSMUSG00000098154 | 15257 Gm5787        |
| ENSMUSG00000064023 | 15258 Klk8          |
| ENSMUSG00000098099 | 15259 Gm7456        |
| ENSMUSG00000030895 | 15260 Hpx           |
| ENSMUSG00000067220 | 15261 Cnga1         |
| ENSMUSG00000091306 | 15262 Gm17606       |
| ENSMUSG00000031517 | 15263 Gpm6a         |
| ENSMUSG00000052384 | 15264 Nrros         |
| ENSMUSG00000025922 | 15265 Gm5045        |
| ENSMUSG00000018844 | 15266 Fndc8         |
| ENSMUSG00000054204 | 15267 Fam150b       |
| ENSMUSG00000053925 | 15268 Gm9929        |
| ENSMUSG00000056596 | 15269 Trnp1         |
| ENSMUSG00000052688 | 15270 Rab7b         |
| ENSMUSG00000050957 | 15271 Insl6         |
| ENSMUSG00000102219 | 15272 Gm6606        |
| ENSMUSG00000023031 | 15273 Cela1         |
| ENSMUSG00000098141 | 15274 Gm6944        |
| ENSMUSG00000079481 | 15275 Nhsl2         |
| ENSMUSG00000020804 | 15276 Aanat         |
| ENSMUSG00000046952 | 15277 Gm5815        |
| ENSMUSG00000083014 | 15278 Gm11764       |
| ENSMUSG00000075273 | 15279 Ttc30b        |
| ENSMUSG00000106981 | 15280 RP23-425N12.2 |
| ENSMUSG00000087367 | 15281 Gm15491       |
| ENSMUSG00000019301 | 15282 Hsd17b1       |
| ENSMUSG00000083394 | 15283 Gm11703       |
| ENSMUSG00000091198 | 15284 Gm5218        |
| ENSMUSG00000061356 | 15285 Nuggc         |
| ENSMUSG00000107718 | 15286 RP23-69L20.2  |

|                    |                     |
|--------------------|---------------------|
| ENSMUSG00000084220 | 15287 Gm12387       |
| ENSMUSG00000038637 | 15288 Lrrc56        |
| ENSMUSG00000073448 | 15289 Gm10509       |
| ENSMUSG00000059049 | 15290 Frem1         |
| ENSMUSG00000102030 | 15291 Gm29106       |
| ENSMUSG00000095193 | 15292 Gm20939       |
| ENSMUSG00000024354 | 15293 Slc23a1       |
| ENSMUSG00000099544 | 15294 Gm18699       |
| ENSMUSG00000029206 | 15295 Nsun7         |
| ENSMUSG00000081281 | 15296 Gm6274        |
| ENSMUSG00000069939 | 15297 Gm12070       |
| ENSMUSG00000089739 | 15298 Gm20431       |
| ENSMUSG00000073607 | 15299 Gm10548       |
| ENSMUSG00000018865 | 15300 Sult4a1       |
| ENSMUSG00000025081 | 15301 Tdrd1         |
| ENSMUSG00000082362 | 15302 Gm5187        |
| ENSMUSG00000081557 | 15303 Gm5697        |
| ENSMUSG00000082566 | 15304 Gm11485       |
| ENSMUSG00000066478 | 15305 Gm5745        |
| ENSMUSG00000081231 | 15306 Tcp1-ps1      |
| ENSMUSG00000082264 | 15307 Gm12799       |
| ENSMUSG00000086925 | 15308 Gm6286        |
| ENSMUSG00000107355 | 15309 Al839979      |
| ENSMUSG00000001247 | 15310 Lsr           |
| ENSMUSG00000095134 | 15311 Gm21857       |
| ENSMUSG00000087168 | 15312 Gm15983       |
| ENSMUSG00000074796 | 15313 Slc4a11       |
| ENSMUSG00000108591 | 15314 RP23-60P18.13 |
| ENSMUSG00000103801 | 15315 Spin3-ps      |
| ENSMUSG00000071550 | 15316 Cfap44        |
| ENSMUSG00000038292 | 15317 Ccdc155       |
| ENSMUSG00000072324 | 15318 Gm8420        |
| ENSMUSG00000056777 | 15319 Rpl21-ps13    |
| ENSMUSG00000108694 | 15320 RP24-549B12.1 |
| ENSMUSG00000100985 | 15321 Gm10640       |
| ENSMUSG00000071680 | 15322 Gm7123        |
| ENSMUSG00000044544 | 15323 4921513I03Rik |
| ENSMUSG00000010066 | 15324 Cacna2d2      |
| ENSMUSG00000090394 | 15325 4930523C07Rik |
| ENSMUSG00000024186 | 15326 Rgs11         |
| ENSMUSG00000090137 | 15327 Uba52         |
| ENSMUSG00000082066 | 15328 Gm13904       |

|                    |                     |
|--------------------|---------------------|
| ENSMUSG00000105965 | 15329 Cyps-ps2      |
| ENSMUSG00000101951 | 15330 Gm28721       |
| ENSMUSG00000021751 | 15331 Acox2         |
| ENSMUSG00000024233 | 15332 Lyzl1         |
| ENSMUSG00000000791 | 15333 Il12rb1       |
| ENSMUSG00000103423 | 15334 Gm5845        |
| ENSMUSG00000050357 | 15335 Rltpr         |
| ENSMUSG00000025321 | 15336 Itgb8         |
| ENSMUSG00000030382 | 15337 Slc27a5       |
| ENSMUSG00000080914 | 15338 Gm7129        |
| ENSMUSG00000108628 | 15339 RP23-44I18.1  |
| ENSMUSG00000046491 | 15340 C1qtnf2       |
| ENSMUSG00000027966 | 15341 Col11a1       |
| ENSMUSG00000022602 | 15342 Arc           |
| ENSMUSG00000028834 | 15343 Trim63        |
| ENSMUSG00000034706 | 15344 Dnaic2        |
| ENSMUSG00000067929 | 15345 Gm10226       |
| ENSMUSG00000107713 | 15346 RP23-12A18.7  |
| ENSMUSG00000097470 | 15347 Gm26587       |
| ENSMUSG00000085000 | 15348 Gm14553       |
| ENSMUSG00000052912 | 15349 Smarca5-ps    |
| ENSMUSG00000013523 | 15350 Bcas1         |
| ENSMUSG00000045968 | 15351 Teddm2        |
| ENSMUSG00000096856 | 15352 Gm10778       |
| ENSMUSG00000102463 | 15353 1700003N22Rik |
| ENSMUSG00000044390 | 15354 Tigd3         |
| ENSMUSG00000097047 | 15355 1110020A21Rik |
| ENSMUSG00000020327 | 15356 Fgf22         |
| ENSMUSG00000103357 | 15357 Gm7804        |
| ENSMUSG00000021268 | 15358 Meg3          |
| ENSMUSG00000060034 | 15359 Ctf2          |
| ENSMUSG00000097979 | 15360 Gm4691        |
| ENSMUSG00000098187 | 15361 Gm8927        |
| ENSMUSG00000097115 | 15362 1810019N24Rik |
| ENSMUSG00000020682 | 15363 Mmp28         |
| ENSMUSG00000065429 | 15364 Mir345        |
| ENSMUSG00000090737 | 15365 Gm6788        |
| ENSMUSG00000085316 | 15366 D330050G23Rik |
| ENSMUSG00000102095 | 15367 C730036E19Rik |
| ENSMUSG00000062279 | 15368 Gm10237       |
| ENSMUSG00000022037 | 15369 Clu           |
| ENSMUSG00000105449 | 15370 Gm43379       |

|                    |                      |
|--------------------|----------------------|
| ENSMUSG00000038984 | 15371 Tspyl5         |
| ENSMUSG00000067745 | 15372 Gm14243        |
| ENSMUSG00000017832 | 15373 Hspb9          |
| ENSMUSG00000085743 | 15374 8430419K02Rik  |
| ENSMUSG00000093651 | 15375 Gm5873         |
| ENSMUSG00000062470 | 15376 Fbxl12os       |
| ENSMUSG00000055494 | 15377 Gm14168        |
| ENSMUSG00000094249 | 15378 Gm20091        |
| ENSMUSG00000085609 | 15379 1700016P03Rik  |
| ENSMUSG00000082241 | 15380 Gm15776        |
| ENSMUSG00000054672 | 15381 5830411N06Rik  |
| ENSMUSG00000083215 | 15382 Rbmx2-ps       |
| ENSMUSG00000026692 | 15383 Fmo4           |
| ENSMUSG00000021638 | 15384 Ocln           |
| ENSMUSG00000073371 | 15385 Gm6594         |
| ENSMUSG00000029530 | 15386 Ccr9           |
| ENSMUSG00000086341 | 15387 Gm15932        |
| ENSMUSG00000107946 | 15388 RP24-127M20.11 |
| ENSMUSG00000083414 | 15389 Gm14840        |
| ENSMUSG00000015365 | 15390 Mov10l1        |
| ENSMUSG00000059776 | 15391 Rpl13-ps6      |
| ENSMUSG00000008601 | 15392 Rab25          |
| ENSMUSG00000079324 | 15393 4932414N04Rik  |
| ENSMUSG00000082622 | 15394 Gm12632        |
| ENSMUSG00000037428 | 15395 Vgf            |
| ENSMUSG00000012889 | 15396 Podnl1         |
| ENSMUSG00000080955 | 15397 Gm14263        |
| ENSMUSG00000049649 | 15398 Gpr3           |
| ENSMUSG00000044060 | 15399 A830010M20Rik  |
| ENSMUSG00000001281 | 15400 Itgb7          |
| ENSMUSG00000022696 | 15401 Sidt1          |
| ENSMUSG00000019320 | 15402 Noxo1          |
| ENSMUSG00000056687 | 15403 Gm11696        |
| ENSMUSG00000081421 | 15404 Gm13445        |
| ENSMUSG00000037477 | 15405 Tbx10          |
| ENSMUSG00000041831 | 15406 Sytl3          |
| ENSMUSG00000051648 | 15407 Kctd19         |
| ENSMUSG00000018507 | 15408 Trpv2          |
| ENSMUSG00000047591 | 15409 Mafa           |
| ENSMUSG00000022039 | 15410 Adam2          |
| ENSMUSG00000029055 | 15411 Plch2          |
| ENSMUSG00000108613 | 15412 RP24-554K14.5  |

|                    |                     |
|--------------------|---------------------|
| ENSMUSG00000087338 | 15413 Scpep1os      |
| ENSMUSG00000099568 | 15414 Gm28513       |
| ENSMUSG00000031883 | 15415 Car7          |
| ENSMUSG00000090744 | 15416 Gm6871        |
| ENSMUSG00000027581 | 15417 Stmn3         |
| ENSMUSG00000081232 | 15418 Gm14373       |
| ENSMUSG00000031493 | 15419 Ggn           |
| ENSMUSG00000082985 | 15420 Gm14042       |
| ENSMUSG00000070985 | 15421 Acnat1        |
| ENSMUSG00000049676 | 15422 Catsperg1     |
| ENSMUSG00000026678 | 15423 Rgs5          |
| ENSMUSG00000074108 | 15424 Rpl10-ps2     |
| ENSMUSG00000085465 | 15425 Gm15347       |
| ENSMUSG00000099634 | 15426 Gm29462       |
| ENSMUSG00000031264 | 15427 Btk           |
| ENSMUSG00000033007 | 15428 Asic4         |
| ENSMUSG00000104065 | 15429 Gm37197       |
| ENSMUSG00000083689 | 15430 Gm14094       |
| ENSMUSG00000051079 | 15431 Rgs13         |
| ENSMUSG00000007591 | 15432 Tssk4         |
| ENSMUSG00000107006 | 15433 Gm43105       |
| ENSMUSG00000035270 | 15434 Impg2         |
| ENSMUSG00000027070 | 15435 Lrp2          |
| ENSMUSG00000032532 | 15436 Cck           |
| ENSMUSG00000041460 | 15437 Cacna2d4      |
| ENSMUSG00000072789 | 15438 Gm10420       |
| ENSMUSG00000107065 | 15439 Gm43155       |
| ENSMUSG00000041205 | 15440 Map6d1        |
| ENSMUSG00000083573 | 15441 Gm7312        |
| ENSMUSG00000099669 | 15442 Gm29012       |
| ENSMUSG00000092458 | 15443 Gm18737       |
| ENSMUSG00000086762 | 15444 Gm14546       |
| ENSMUSG00000073421 | 15445 H2-Ab1        |
| ENSMUSG00000098180 | 15446 Gm5430        |
| ENSMUSG00000009646 | 15447 Pla2g12b      |
| ENSMUSG00000047642 | 15448 D930020B18Rik |
| ENSMUSG00000054293 | 15449 A630033H20Rik |
| ENSMUSG00000106703 | 15450 Vmn2r-ps26    |
| ENSMUSG00000108456 | 15451 RP24-143K11.2 |
| ENSMUSG00000081461 | 15452 Rpl30-ps11    |
| ENSMUSG00000025537 | 15453 Phkg1         |
| ENSMUSG00000029309 | 15454 Sparcl1       |



|                     |                     |
|---------------------|---------------------|
| ENSMUSG00000047880  | 15455 Cxcr5         |
| ENSMUSG00000032561  | 15456 Acpp          |
| ENSMUSG00000020636  | 15457 Allc          |
| ENSMUSG00000097258  | 15458 Gm26767       |
| ENSMUSG00000025780  | 15459 Itih5         |
| ENSMUSG00000022122  | 15460 Ednrb         |
| ENSMUSG00000020673  | 15461 Tpo           |
| ENSMUSG00000093849  | 15462 Gm7083        |
| ENSMUSG00000066632  | 15463 Pgk1-rs7      |
| ENSMUSG00000025422  | 15464 Agap2         |
| ENSMUSG00000079550  | 15465 Mpp4          |
| ENSMUSG00000059565  | 15466 Gm5292        |
| ENSMUSG00000021210  | 15467 Akr1c6        |
| ENSMUSG00000076434  | 15468 Wfdc3         |
| ENSMUSG00000039672  | 15469 Kcne2         |
| ENSMUSG000000103799 | 15470 Gm38093       |
| ENSMUSG00000027801  | 15471 Tm4sf4        |
| ENSMUSG00000026931  | 15472 1700019N19Rik |
| ENSMUSG000000100389 | 15473 Rbm6-ps2      |
| ENSMUSG00000082122  | 15474 Gm11809       |
| ENSMUSG00000054013  | 15475 Tmem179       |
| ENSMUSG00000072874  | 15476 Gm6116        |
| ENSMUSG00000082121  | 15477 Gm8199        |
| ENSMUSG00000081189  | 15478 Hspd1-ps4     |
| ENSMUSG00000056457  | 15479 Prl2c3        |
| ENSMUSG00000083291  | 15480 Gm13679       |
| ENSMUSG00000044081  | 15481 Zfp85os       |
| ENSMUSG00000029121  | 15482 Crmp1         |
| ENSMUSG00000052854  | 15483 Nrk           |
| ENSMUSG000000101089 | 15484 2610016A17Rik |
| ENSMUSG00000026398  | 15485 Nr5a2         |
| ENSMUSG00000028370  | 15486 Pappa         |
| ENSMUSG000000101784 | 15487 Gm7553        |
| ENSMUSG00000029235  | 15488 Pdcl2         |
| ENSMUSG00000038151  | 15489 Prdm1         |
| ENSMUSG00000045942  | 15490 BC049762      |
| ENSMUSG00000043811  | 15491 Rtn4r         |
| ENSMUSG00000036480  | 15492 Prss56        |
| ENSMUSG00000093826  | 15493 Gm6900        |
| ENSMUSG00000042655  | 15494 Fam159b       |
| ENSMUSG000000108089 | 15495 RP24-576D11.2 |
| ENSMUSG00000047085  | 15496 Lrrc4b        |

|                    |                     |
|--------------------|---------------------|
| ENSMUSG00000097890 | 15497 4930547M16Rik |
| ENSMUSG00000034171 | 15498 Faah          |
| ENSMUSG00000096002 | 15499 Vmn2r53       |
| ENSMUSG00000073102 | 15500 Drc1          |
| ENSMUSG00000063383 | 15501 Zfp947        |
| ENSMUSG00000025911 | 15502 Adhfe1        |
| ENSMUSG00000079012 | 15503 Serpina3m     |
| ENSMUSG00000048450 | 15504 Msx1          |
| ENSMUSG00000108461 | 15505 RP24-157O12.2 |
| ENSMUSG00000050212 | 15506 Eva1b         |
| ENSMUSG00000042672 | 15507 Dcst1         |
| ENSMUSG00000082607 | 15508 Gm12045       |
| ENSMUSG00000037167 | 15509 Spaca5        |
| ENSMUSG00000039438 | 15510 Ttc36         |
| ENSMUSG00000054517 | 15511 Trim65        |
| ENSMUSG00000075437 | 15512 Gm11681       |
| ENSMUSG00000030554 | 15513 Synm          |
| ENSMUSG00000091233 | 15514 Gm6434        |
| ENSMUSG00000066800 | 15515 Rnasel        |
| ENSMUSG00000068874 | 15516 Selenbp1      |
| ENSMUSG00000079110 | 15517 Capn3         |
| ENSMUSG00000060890 | 15518 Arr3          |
| ENSMUSG00000072576 | 15519 Gm16020       |
| ENSMUSG00000107336 | 15520 Gm43461       |
| ENSMUSG00000039714 | 15521 Cplx3         |
| ENSMUSG00000105687 | 15522 Gm6157        |
| ENSMUSG00000080839 | 15523 Gm11625       |
| ENSMUSG00000032368 | 15524 Zic1          |
| ENSMUSG00000100913 | 15525 Gm8392        |
| ENSMUSG00000080708 | 15526 Ccnd3-ps      |
| ENSMUSG00000081553 | 15527 Ccdc50-ps     |
| ENSMUSG00000029154 | 15528 Cwh43         |
| ENSMUSG00000085744 | 15529 Gm12259       |
| ENSMUSG00000028860 | 15530 Sytl1         |
| ENSMUSG00000026874 | 15531 Hc            |
| ENSMUSG00000006958 | 15532 Chrd          |
| ENSMUSG00000000317 | 15533 Bcl6b         |
| ENSMUSG00000081607 | 15534 Gm15294       |
| ENSMUSG00000097711 | 15535 Gm5523        |
| ENSMUSG00000096647 | 15536 Gm6223        |
| ENSMUSG00000103964 | 15537 Gm8407        |
| ENSMUSG00000035427 | 15538 Mageb4        |

|                    |                     |
|--------------------|---------------------|
| ENSMUSG00000081664 | 15539 Gm15544       |
| ENSMUSG00000091619 | 15540 Gm3625        |
| ENSMUSG00000098779 | 15541 Gm8602        |
| ENSMUSG00000052273 | 15542 Dnah3         |
| ENSMUSG00000027938 | 15543 Creb3l4       |
| ENSMUSG00000086742 | 15544 Gm16201       |
| ENSMUSG00000029844 | 15545 Hoxa1         |
| ENSMUSG00000039496 | 15546 Cdnf          |
| ENSMUSG00000000686 | 15547 Abhd15        |
| ENSMUSG00000029564 | 15548 4930519G04Rik |
| ENSMUSG00000027377 | 15549 Mall          |
| ENSMUSG00000097755 | 15550 2010110K18Rik |
| ENSMUSG00000083054 | 15551 Gm12986       |
| ENSMUSG00000083311 | 15552 Gm5643        |
| ENSMUSG00000046856 | 15553 Gpr1          |
| ENSMUSG00000028116 | 15554 Myoz2         |
| ENSMUSG00000002274 | 15555 Metrnl        |
| ENSMUSG00000066842 | 15556 Hmgn1         |
| ENSMUSG00000024957 | 15557 Kcnk4         |
| ENSMUSG00000028864 | 15558 Hgf           |
| ENSMUSG00000028289 | 15559 Epha7         |
| ENSMUSG00000044296 | 15560 Zfp879        |
| ENSMUSG00000030359 | 15561 Pzp           |
| ENSMUSG00000070490 | 15562 Gm10293       |
| ENSMUSG00000015340 | 15563 Cybb          |
| ENSMUSG00000082196 | 15564 Gm14231       |
| ENSMUSG00000024036 | 15565 Slc37a1       |
| ENSMUSG00000098194 | 15566 Gm7286        |
| ENSMUSG00000108529 | 15567 RP24-425H24.3 |
| ENSMUSG00000021719 | 15568 Rgs7bp        |
| ENSMUSG00000085146 | 15569 Eif2c5        |
| ENSMUSG00000006930 | 15570 Hap1          |
| ENSMUSG00000038147 | 15571 Cd84          |
| ENSMUSG00000089759 | 15572 3632454L22Rik |
| ENSMUSG00000085148 | 15573 Mir22hg       |
| ENSMUSG00000107182 | 15574 Gm43268       |
| ENSMUSG00000097165 | 15575 2210008F06Rik |
| ENSMUSG00000091060 | 15576 7420461P10Rik |
| ENSMUSG00000044641 | 15577 Pard6b        |
| ENSMUSG00000068674 | 15578 Gm10247       |
| ENSMUSG00000096044 | 15579 Gm16427       |
| ENSMUSG00000086056 | 15580 Gm4846        |

|                     |                      |
|---------------------|----------------------|
| ENSMUSG00000086174  | 15581 Gm6425         |
| ENSMUSG00000097131  | 15582 D230017M19Rik  |
| ENSMUSG00000028251  | 15583 Tstd3          |
| ENSMUSG000000108015 | 15584 RP23-81F19.1   |
| ENSMUSG000000108601 | 15585 RP23-8I8.4     |
| ENSMUSG00000035623  | 15586 Rsf1           |
| ENSMUSG00000034645  | 15587 Zyg11a         |
| ENSMUSG00000084186  | 15588 Rpl36-ps10     |
| ENSMUSG00000081514  | 15589 Gm14673        |
| ENSMUSG00000046598  | 15590 Bdh1           |
| ENSMUSG00000030486  | 15591 Zfp108         |
| ENSMUSG00000022148  | 15592 Fyb            |
| ENSMUSG00000030474  | 15593 Siglece        |
| ENSMUSG00000034845  | 15594 Plvap          |
| ENSMUSG00000082144  | 15595 Gm12788        |
| ENSMUSG00000081695  | 15596 Rpsa-ps5       |
| ENSMUSG00000083004  | 15597 Gm13413        |
| ENSMUSG00000098048  | 15598 Gm8330         |
| ENSMUSG00000083785  | 15599 Gm11888        |
| ENSMUSG00000097913  | 15600 Gm26837        |
| ENSMUSG000000105397 | 15601 Gm43471        |
| ENSMUSG00000085486  | 15602 Gm11634        |
| ENSMUSG00000082478  | 15603 Gm11619        |
| ENSMUSG00000098113  | 15604 Gm2445         |
| ENSMUSG00000037075  | 15605 Rnf139         |
| ENSMUSG00000021415  | 15606 4933417A18Rik  |
| ENSMUSG000000106392 | 15607 Gm5870         |
| ENSMUSG00000099449  | 15608 Gm28401        |
| ENSMUSG000000107588 | 15609 RP24-124B23.17 |
| ENSMUSG00000031734  | 15610 Irx3           |
| ENSMUSG00000025497  | 15611 Cdhr5          |
| ENSMUSG00000034730  | 15612 Adgrb1         |
| ENSMUSG00000024575  | 15613 Pde6a          |
| ENSMUSG00000037035  | 15614 Inhbb          |
| ENSMUSG00000081718  | 15615 Gm8261         |
| ENSMUSG000000106576 | 15616 Gm4866         |
| ENSMUSG00000075012  | 15617 Fjx1           |
| ENSMUSG00000031452  | 15618 1700029H14Rik  |
| ENSMUSG00000069300  | 15619 Hist1h2bj      |
| ENSMUSG00000083547  | 15620 Gm13321        |
| ENSMUSG00000029337  | 15621 Fgf5           |
| ENSMUSG00000042116  | 15622 Vwa1           |

|                    |                     |
|--------------------|---------------------|
| ENSMUSG00000079076 | 15623 Gm3086        |
| ENSMUSG00000084076 | 15624 Gm14600       |
| ENSMUSG00000083819 | 15625 Gm11977       |
| ENSMUSG00000097578 | 15626 Gm26798       |
| ENSMUSG00000083554 | 15627 Gm6645        |
| ENSMUSG00000082318 | 15628 Gm14162       |
| ENSMUSG00000101625 | 15629 Gm29371       |
| ENSMUSG00000020226 | 15630 Slc5a4b       |
| ENSMUSG00000004651 | 15631 Tyr           |
| ENSMUSG00000084083 | 15632 Gm15782       |
| ENSMUSG00000027435 | 15633 Cd93          |
| ENSMUSG00000026104 | 15634 Stat1         |
| ENSMUSG00000058905 | 15635 Gm10051       |
| ENSMUSG00000079042 | 15636 Apela         |
| ENSMUSG00000027674 | 15637 Pex5l         |
| ENSMUSG00000036244 | 15638 Tbc1d21       |
| ENSMUSG00000104892 | 15639 Gm6615        |
| ENSMUSG00000039155 | 15640 Cdh26         |
| ENSMUSG00000027245 | 15641 Hypk          |
| ENSMUSG00000084185 | 15642 Rplp1-ps1     |
| ENSMUSG00000048387 | 15643 Osr1          |
| ENSMUSG00000032769 | 15644 Trpa1         |
| ENSMUSG00000019876 | 15645 Pkib          |
| ENSMUSG00000092602 | 15646 4931413I07Rik |
| ENSMUSG00000027408 | 15647 Cpxm1         |
| ENSMUSG00000055271 | 15648 9330161L09Rik |
| ENSMUSG00000061171 | 15649 Slc38a11      |
| ENSMUSG00000086481 | 15650 Gm11707       |
| ENSMUSG00000031202 | 15651 Rab39b        |
| ENSMUSG00000080718 | 15652 Gm8019        |
| ENSMUSG00000031837 | 15653 Necab2        |
| ENSMUSG00000072476 | 15654 Gm9008        |
| ENSMUSG00000091712 | 15655 Sec14l5       |
| ENSMUSG00000085242 | 15656 Gm11537       |
| ENSMUSG00000103733 | 15657 Gm6162        |
| ENSMUSG00000105248 | 15658 Gm5310        |
| ENSMUSG00000092060 | 15659 Bend4         |
| ENSMUSG00000098210 | 15660 Gm5224        |
| ENSMUSG00000044814 | 15661 Olfr543       |
| ENSMUSG00000020399 | 15662 Havcr2        |
| ENSMUSG00000083659 | 15663 Gm11258       |
| ENSMUSG00000096932 | 15664 5033403F01Rik |

|                    |                     |
|--------------------|---------------------|
| ENSMUSG00000086075 | 15665 Gm15728       |
| ENSMUSG00000093552 | 15666 Gm5777        |
| ENSMUSG00000011832 | 15667 Evi5l         |
| ENSMUSG00000081350 | 15668 Gm5388        |
| ENSMUSG00000026012 | 15669 Cd28          |
| ENSMUSG00000002500 | 15670 Rpl3l         |
| ENSMUSG00000064125 | 15671 Prr36         |
| ENSMUSG00000093649 | 15672 Gm20614       |
| ENSMUSG00000070691 | 15673 Runx3         |
| ENSMUSG00000097077 | 15674 Gm16712       |
| ENSMUSG00000108046 | 15675 RP23-318B18.1 |
| ENSMUSG00000001504 | 15676 Irx2          |
| ENSMUSG00000031877 | 15677 Ces2g         |
| ENSMUSG00000056370 | 15678 Sftpb         |
| ENSMUSG00000071035 | 15679 Gm5499        |
| ENSMUSG00000091771 | 15680 Vmn2r103      |
| ENSMUSG00000105139 | 15681 Gm43223       |
| ENSMUSG00000035860 | 15682 Cdhr3         |
| ENSMUSG00000096722 | 15683 Hmgb1-ps9     |
| ENSMUSG00000029685 | 15684 Asb15         |
| ENSMUSG00000036731 | 15685 Cysrt1        |
| ENSMUSG00000041301 | 15686 Cftr          |
| ENSMUSG00000034308 | 15687 Sdr42e1       |
| ENSMUSG00000083328 | 15688 Gm11826       |
| ENSMUSG00000096959 | 15689 4930509G22Rik |
| ENSMUSG00000074003 | 15690 Gucy2d        |
| ENSMUSG00000024215 | 15691 Spdef         |
| ENSMUSG00000030380 | 15692 Mzf1          |
| ENSMUSG00000081126 | 15693 Gm15784       |
| ENSMUSG00000082578 | 15694 Gm13527       |
| ENSMUSG00000021797 | 15695 9230112D13Rik |
| ENSMUSG00000108610 | 15696 RP24-490A22.5 |
| ENSMUSG00000102490 | 15697 Gm36985       |
| ENSMUSG00000086308 | 15698 G630016G05Rik |
| ENSMUSG00000071475 | 15699 Rpl21-ps5     |
| ENSMUSG00000038522 | 15700 Al317395      |
| ENSMUSG00000093846 | 15701 Gm4425        |
| ENSMUSG00000017652 | 15702 Cd40          |
| ENSMUSG00000101652 | 15703 Gm6060        |
| ENSMUSG00000035459 | 15704 Stab2         |
| ENSMUSG00000105274 | 15705 1700048F04Rik |
| ENSMUSG00000045625 | 15706 Pigz          |

|                    |                     |
|--------------------|---------------------|
| ENSMUSG00000104682 | 15707 Gm42636       |
| ENSMUSG00000089235 | 15708 Gm23119       |
| ENSMUSG00000101875 | 15709 Gm6028        |
| ENSMUSG00000048779 | 15710 P2ry6         |
| ENSMUSG00000022488 | 15711 Nckap1l       |
| ENSMUSG00000024806 | 15712 Mlana         |
| ENSMUSG00000078439 | 15713 Smim24        |
| ENSMUSG00000086754 | 15714 Gm16098       |
| ENSMUSG00000105441 | 15715 Gm8041        |
| ENSMUSG00000029408 | 15716 Abcb9         |
| ENSMUSG00000037379 | 15717 Spon2         |
| ENSMUSG00000012211 | 15718 Tex22         |
| ENSMUSG00000086417 | 15719 Gm12996       |
| ENSMUSG00000107622 | 15720 RP24-226D9.3  |
| ENSMUSG00000025221 | 15721 Kcnip2        |
| ENSMUSG00000070443 | 15722 Gm10291       |
| ENSMUSG00000096374 | 15723 Gm6664        |
| ENSMUSG00000065449 | 15724 Mir365-1      |
| ENSMUSG00000029633 | 15725 Gm5578        |
| ENSMUSG00000028041 | 15726 Adam15        |
| ENSMUSG00000041730 | 15727 Prrxl1        |
| ENSMUSG00000054514 | 15728 Atad3aos      |
| ENSMUSG00000046807 | 15729 Lrrc75b       |
| ENSMUSG00000107288 | 15730 Gm42903       |
| ENSMUSG00000085255 | 15731 Taco1os       |
| ENSMUSG00000054493 | 15732 Gm9947        |
| ENSMUSG00000037279 | 15733 Ovol2         |
| ENSMUSG00000015467 | 15734 Egfl8         |
| ENSMUSG00000061815 | 15735 Rufy4         |
| ENSMUSG00000086961 | 15736 Gm12946       |
| ENSMUSG00000062593 | 15737 Lilrb4a       |
| ENSMUSG00000040498 | 15738 Igsf23        |
| ENSMUSG00000013643 | 15739 Lypd8         |
| ENSMUSG00000108798 | 15740 RP23-403E18.2 |
| ENSMUSG00000063851 | 15741 Rnf183        |
| ENSMUSG00000106930 | 15742 Gm6450        |
| ENSMUSG00000035283 | 15743 Adrb1         |
| ENSMUSG00000103265 | 15744 Gm2053        |
| ENSMUSG00000057132 | 15745 Rpgrip1       |
| ENSMUSG00000035456 | 15746 Prdm8         |
| ENSMUSG00000048534 | 15747 Amica1        |
| ENSMUSG00000000730 | 15748 Dnmt3l        |

|                    |                      |
|--------------------|----------------------|
| ENSMUSG00000081763 | 15749 Gm9435         |
| ENSMUSG00000101571 | 15750 Gm6187         |
| ENSMUSG00000027709 | 15751 Mccc1          |
| ENSMUSG00000014529 | 15752 Tmbim7         |
| ENSMUSG00000107198 | 15753 Gm19619        |
| ENSMUSG00000087613 | 15754 Gm13855        |
| ENSMUSG00000087090 | 15755 Nctc1          |
| ENSMUSG00000081041 | 15756 Nlk-ps1        |
| ENSMUSG00000028539 | 15757 Artn           |
| ENSMUSG00000107546 | 15758 RP23-348K12.3  |
| ENSMUSG00000055958 | 15759 Gm9987         |
| ENSMUSG00000101678 | 15760 Gm29609        |
| ENSMUSG00000035235 | 15761 Trim13         |
| ENSMUSG00000090564 | 15762 A430057M04Rik  |
| ENSMUSG00000107956 | 15763 CAAA01093181.1 |
| ENSMUSG00000018925 | 15764 Heatr9         |
| ENSMUSG00000083707 | 15765 Gm13592        |
| ENSMUSG00000043613 | 15766 Mmp3           |
| ENSMUSG00000072763 | 15767 5430403G16Rik  |
| ENSMUSG00000058099 | 15768 Nfam1          |
| ENSMUSG00000051592 | 15769 Ccnb3          |
| ENSMUSG00000083640 | 15770 Gm8876         |
| ENSMUSG00000003531 | 15771 Dgcr6          |
| ENSMUSG00000035057 | 15772 Mgat4d         |
| ENSMUSG00000015001 | 15773 Oc90           |
| ENSMUSG00000040264 | 15774 Gbp2b          |
| ENSMUSG00000075318 | 15775 Scn2a1         |
| ENSMUSG00000014813 | 15776 Stc1           |
| ENSMUSG00000056492 | 15777 Adgrf5         |
| ENSMUSG00000071262 | 15778 Zfp957         |
| ENSMUSG00000083236 | 15779 Gm7222         |
| ENSMUSG00000097935 | 15780 Gm3809         |
| ENSMUSG00000047986 | 15781 Palm3          |
| ENSMUSG00000086631 | 15782 Gm12784        |
| ENSMUSG00000024391 | 15783 Apom           |
| ENSMUSG00000016496 | 15784 Cd274          |
| ENSMUSG00000084967 | 15785 Gm12296        |
| ENSMUSG00000061048 | 15786 Cdh3           |
| ENSMUSG00000030772 | 15787 Dkk3           |
| ENSMUSG00000082128 | 15788 Gm11824        |
| ENSMUSG00000006784 | 15789 Ttc25          |
| ENSMUSG00000058831 | 15790 Opn1sw         |



|                    |                     |
|--------------------|---------------------|
| ENSMUSG00000087150 | 15791 BC064078      |
| ENSMUSG00000084904 | 15792 Gm14827       |
| ENSMUSG00000107090 | 15793 Gm42884       |
| ENSMUSG00000030249 | 15794 Abcc9         |
| ENSMUSG00000066107 | 15795 Gm12666       |
| ENSMUSG00000090967 | 15796 Vmn2r61       |
| ENSMUSG00000078945 | 15797 Naip2         |
| ENSMUSG00000108100 | 15798 RP24-402E22.1 |
| ENSMUSG00000086743 | 15799 Hnrnpa1l2-ps  |
| ENSMUSG00000027950 | 15800 Chrn2         |
| ENSMUSG00000024620 | 15801 Pdgfrb        |
| ENSMUSG00000032338 | 15802 Hcn4          |
| ENSMUSG00000085412 | 15803 Halr1         |
| ENSMUSG00000086160 | 15804 4933438A12Rik |
| ENSMUSG00000042258 | 15805 Isl1          |
| ENSMUSG00000082140 | 15806 Gm13094       |
| ENSMUSG00000106678 | 15807 Gm43457       |
| ENSMUSG00000021575 | 15808 Ahrr          |
| ENSMUSG00000082284 | 15809 H3f3a-ps1     |
| ENSMUSG00000085217 | 15810 6030471H07Rik |
| ENSMUSG00000092592 | 15811 Gm20449       |
| ENSMUSG00000066175 | 15812 2510046G10Rik |
| ENSMUSG00000018169 | 15813 Mfng          |
| ENSMUSG00000075416 | 15814 Gm14488       |
| ENSMUSG00000043090 | 15815 Zfp866        |
| ENSMUSG00000098028 | 15816 Gm8824        |
| ENSMUSG00000091504 | 15817 Vmn2r118      |
| ENSMUSG00000081331 | 15818 Gm15151       |
| ENSMUSG00000103283 | 15819 Gm37276       |
| ENSMUSG00000097719 | 15820 Rpl31-ps18    |
| ENSMUSG00000107374 | 15821 Gm43172       |
| ENSMUSG00000056328 | 15822 Myh1          |
| ENSMUSG00000064329 | 15823 Scn1a         |
| ENSMUSG00000028845 | 15824 Tekt2         |
| ENSMUSG00000042797 | 15825 Aqp11         |
| ENSMUSG00000107731 | 15826 RP23-287N15.2 |
| ENSMUSG00000081892 | 15827 Gm8864        |
| ENSMUSG00000074151 | 15828 Nlrc5         |
| ENSMUSG00000100398 | 15829 Gm5251        |
| ENSMUSG00000084017 | 15830 Rpl21-ps9     |
| ENSMUSG00000097243 | 15831 Gm26908       |
| ENSMUSG00000082113 | 15832 Gm13915       |

|                    |                     |
|--------------------|---------------------|
| ENSMUSG00000022623 | 15833 Shank3        |
| ENSMUSG00000048218 | 15834 Amigo2        |
| ENSMUSG00000103213 | 15835 Gm38289       |
| ENSMUSG00000050675 | 15836 Gp1ba         |
| ENSMUSG00000081369 | 15837 Gm11896       |
| ENSMUSG00000018479 | 15838 1700125H20Rik |
| ENSMUSG00000062028 | 15839 Irgc1         |
| ENSMUSG00000082729 | 15840 Gm14845       |
| ENSMUSG00000030378 | 15841 Sult2a8       |
| ENSMUSG00000083094 | 15842 Gm4908        |
| ENSMUSG00000040612 | 15843 Ildr2         |
| ENSMUSG00000039481 | 15844 Nrtn          |
| ENSMUSG00000045034 | 15845 Ankrd34b      |
| ENSMUSG00000060380 | 15846 C030014I23Rik |
| ENSMUSG00000106009 | 15847 Gm9379        |
| ENSMUSG00000005611 | 15848 Mrvi1         |
| ENSMUSG00000040340 | 15849 1700019B03Rik |
| ENSMUSG00000018654 | 15850 Ikzf1         |
| ENSMUSG00000069301 | 15851 Hist1h2ag     |
| ENSMUSG00000103520 | 15852 1110025M09Rik |
| ENSMUSG00000038015 | 15853 Prm2          |
| ENSMUSG00000030793 | 15854 Pycard        |
| ENSMUSG00000021613 | 15855 Hapln1        |
| ENSMUSG00000059325 | 15856 Hopx          |
| ENSMUSG00000093385 | 15857 A330044P14Rik |
| ENSMUSG00000028307 | 15858 Aldob         |
| ENSMUSG00000097787 | 15859 2700046G09Rik |
| ENSMUSG00000054057 | 15860 A930004D18Rik |
| ENSMUSG00000029158 | 15861 Yipf7         |
| ENSMUSG00000050677 | 15862 Ccdc96        |
| ENSMUSG00000073400 | 15863 Trim10        |
| ENSMUSG00000086447 | 15864 Gm13522       |
| ENSMUSG00000086918 | 15865 4930429F24Rik |
| ENSMUSG00000074092 | 15866 Gm6181        |
| ENSMUSG00000026630 | 15867 Batf3         |
| ENSMUSG00000086350 | 15868 B230369F24Rik |
| ENSMUSG00000097915 | 15869 A330009N23Rik |
| ENSMUSG00000046415 | 15870 B430212C06Rik |
| ENSMUSG00000085085 | 15871 1700086P04Rik |
| ENSMUSG00000009628 | 15872 Tex15         |
| ENSMUSG00000081243 | 15873 Gm14037       |
| ENSMUSG00000089964 | 15874 Gm16582       |

|                    |                     |
|--------------------|---------------------|
| ENSMUSG00000064294 | 15875 Aox3          |
| ENSMUSG00000011034 | 15876 Slc5a1        |
| ENSMUSG00000090610 | 15877 Gm3571        |
| ENSMUSG00000082599 | 15878 Gm13141       |
| ENSMUSG00000041544 | 15879 Ptchd2        |
| ENSMUSG00000064081 | 15880 Gm8973        |
| ENSMUSG00000086139 | 15881 Gm11211       |
| ENSMUSG00000082260 | 15882 Gm7429        |
| ENSMUSG00000096920 | 15883 Rps19-ps8     |
| ENSMUSG00000070896 | 15884 Rpl23a-ps1    |
| ENSMUSG00000101930 | 15885 Gm5441        |
| ENSMUSG00000097604 | 15886 Gm17322       |
| ENSMUSG00000047343 | 15887 Mettl21c      |
| ENSMUSG00000058624 | 15888 Gda           |
| ENSMUSG00000102006 | 15889 Gm28591       |
| ENSMUSG00000034282 | 15890 Evpl          |
| ENSMUSG00000025196 | 15891 Cpn1          |
| ENSMUSG00000027794 | 15892 Sohlh2        |
| ENSMUSG00000101028 | 15893 Gm28723       |
| ENSMUSG00000095709 | 15894 Gm21378       |
| ENSMUSG00000106067 | 15895 Gm7902        |
| ENSMUSG00000049721 | 15896 Gal3st1       |
| ENSMUSG00000078787 | 15897 Cyp2t4        |
| ENSMUSG00000084792 | 15898 1700056N10Rik |
| ENSMUSG00000095730 | 15899 Vmn2r29       |
| ENSMUSG00000026700 | 15900 Tnfsf4        |
| ENSMUSG00000026080 | 15901 Chst10        |
| ENSMUSG00000029001 | 15902 Fbxo44        |
| ENSMUSG00000014030 | 15903 Pax5          |
| ENSMUSG00000048776 | 15904 Pthlh         |
| ENSMUSG00000035020 | 15905 Epgn          |
| ENSMUSG00000080929 | 15906 Gm12891       |
| ENSMUSG00000060224 | 15907 Pyroxd2       |
| ENSMUSG00000101172 | 15908 Gm28535       |
| ENSMUSG00000074591 | 15909 Ankub1        |
| ENSMUSG00000066510 | 15910 Ankdd1a       |
| ENSMUSG00000078850 | 15911 Gm2348        |
| ENSMUSG00000040543 | 15912 Pitpnm3       |
| ENSMUSG00000059479 | 15913 B3gnt8        |
| ENSMUSG00000034853 | 15914 Acot11        |
| ENSMUSG00000015619 | 15915 Gata3         |
| ENSMUSG00000100393 | 15916 Gm29491       |

|                     |                     |
|---------------------|---------------------|
| ENSMUSG00000036473  | 15917 Tbc1d24       |
| ENSMUSG00000080982  | 15918 Gm13549       |
| ENSMUSG00000097444  | 15919 Gm10489       |
| ENSMUSG00000102859  | 15920 Gm8625        |
| ENSMUSG00000085585  | 15921 Gm12223       |
| ENSMUSG00000102471  | 15922 Gm5100        |
| ENSMUSG00000059835  | 15923 Rpl13-ps3     |
| ENSMUSG00000029102  | 15924 Hgfac         |
| ENSMUSG00000068299  | 15925 1700019G17Rik |
| ENSMUSG00000069962  | 15926 Gm5356        |
| ENSMUSG00000022594  | 15927 Lynx1         |
| ENSMUSG00000002664  | 15928 Pspn          |
| ENSMUSG00000083281  | 15929 Gm13332       |
| ENSMUSG00000106157  | 15930 4930555A03Rik |
| ENSMUSG00000031510  | 15931 1700128E19Rik |
| ENSMUSG000000098112 | 15932 Bin2          |
| ENSMUSG00000081543  | 15933 Gm12733       |
| ENSMUSG00000105536  | 15934 Gm4959        |
| ENSMUSG00000044916  | 15935 1700029I15Rik |
| ENSMUSG00000055541  | 15936 Lair1         |
| ENSMUSG00000093885  | 15937 Rpl35a-ps5    |
| ENSMUSG00000083962  | 15938 Gm15707       |
| ENSMUSG00000097255  | 15939 Rpl31-ps7     |
| ENSMUSG00000097617  | 15940 Gm10687       |
| ENSMUSG00000107687  | 15941 Rpl36a-ps5    |
| ENSMUSG00000043295  | 15942 Gm16373       |
| ENSMUSG00000029608  | 15943 Rph3a         |
| ENSMUSG00000029072  | 15944 Tas1r3        |
| ENSMUSG00000068014  | 15945 Gm14648       |
| ENSMUSG00000083812  | 15946 Gm5054        |
| ENSMUSG00000046748  | 15947 Tmem45a2      |
| ENSMUSG00000070331  | 15948 Qrich2        |
| ENSMUSG00000032806  | 15949 Slc10a3       |
| ENSMUSG00000078867  | 15950 Gm14418       |
| ENSMUSG00000046167  | 15951 Gldn          |
| ENSMUSG00000083841  | 15952 Gm1947        |
| ENSMUSG00000037469  | 15953 Papl          |
| ENSMUSG00000046449  | 15954 C77370        |
| ENSMUSG00000103439  | 15955 Gm7019        |
| ENSMUSG00000097156  | 15956 Gm3764        |
| ENSMUSG00000026532  | 15957 Spta1         |
| ENSMUSG00000069272  | 15958 Hist1h2ae     |

|                     |                     |
|---------------------|---------------------|
| ENSMUSG00000095406  | 15959 Gm18025       |
| ENSMUSG00000028186  | 15960 Uox           |
| ENSMUSG00000063594  | 15961 Gng8          |
| ENSMUSG00000081483  | 15962 Gm12445       |
| ENSMUSG00000098203  | 15963 Gm9568        |
| ENSMUSG00000087236  | 15964 Gm1305        |
| ENSMUSG00000031548  | 15965 Sfrp1         |
| ENSMUSG00000029379  | 15966 Cxcl3         |
| ENSMUSG00000097186  | 15967 Gm26595       |
| ENSMUSG00000039209  | 15968 Rpl39l        |
| ENSMUSG00000097361  | 15969 4930550C17Rik |
| ENSMUSG00000036304  | 15970 Zdhhc23       |
| ENSMUSG00000083253  | 15971 Gm7108        |
| ENSMUSG00000053852  | 15972 Adgrg4        |
| ENSMUSG00000028125  | 15973 Abca4         |
| ENSMUSG000000107810 | 15974 RP24-363O21.8 |
| ENSMUSG00000085415  | 15975 Gm12060       |
| ENSMUSG00000074604  | 15976 Mgst2         |
| ENSMUSG00000026354  | 15977 Lct           |
| ENSMUSG00000084086  | 15978 Gm5761        |
| ENSMUSG00000024155  | 15979 Meiob         |
| ENSMUSG00000039257  | 15980 Vstm2b        |
| ENSMUSG00000030804  | 15981 Gm21974       |
| ENSMUSG000000102704 | 15982 Gm38309       |
| ENSMUSG00000047496  | 15983 Rnf152        |
| ENSMUSG00000083072  | 15984 Gm13668       |
| ENSMUSG00000044034  | 15985 Npb           |
| ENSMUSG00000054135  | 15986 A430110L20Rik |
| ENSMUSG00000015085  | 15987 Entpd2        |
| ENSMUSG00000028115  | 15988 Bnpl          |
| ENSMUSG00000038276  | 15989 Asic3         |
| ENSMUSG00000082901  | 15990 Gm14323       |
| ENSMUSG00000054594  | 15991 Oscar         |
| ENSMUSG00000026241  | 15992 Nppc          |
| ENSMUSG00000049115  | 15993 Agtr1a        |
| ENSMUSG00000030806  | 15994 Stx1b         |
| ENSMUSG00000028841  | 15995 Cnksr1        |
| ENSMUSG00000097445  | 15996 Gm26631       |
| ENSMUSG00000078887  | 15997 Gm6710        |
| ENSMUSG00000086328  | 15998 2700033N17Rik |
| ENSMUSG00000000782  | 15999 Tcf7          |
| ENSMUSG00000058626  | 16000 Capn11        |

|                    |                     |
|--------------------|---------------------|
| ENSMUSG00000104993 | 16001 Gm43510       |
| ENSMUSG00000085020 | 16002 2310081O03Rik |
| ENSMUSG00000032246 | 16003 Calml4        |
| ENSMUSG00000039963 | 16004 Ccdc40        |
| ENSMUSG00000097748 | 16005 Gm26533       |
| ENSMUSG00000085321 | 16006 4930412F09Rik |
| ENSMUSG00000022483 | 16007 Col2a1        |
| ENSMUSG00000082707 | 16008 Gm6881        |
| ENSMUSG00000084199 | 16009 Gm12422       |
| ENSMUSG00000105327 | 16010 Gm9409        |
| ENSMUSG00000035540 | 16011 Gc            |
| ENSMUSG00000073650 | 16012 Catip         |
| ENSMUSG00000056054 | 16013 S100a8        |
| ENSMUSG00000028177 | 16014 1810013D15Rik |
| ENSMUSG00000097440 | 16015 Gm6277        |
| ENSMUSG00000101224 | 16016 Gm28209       |
| ENSMUSG00000085962 | 16017 Gm16984       |
| ENSMUSG00000029736 | 16018 Nobox         |
| ENSMUSG00000020178 | 16019 Adora2a       |
| ENSMUSG00000107856 | 16020 RP24-322F4.1  |
| ENSMUSG00000097867 | 16021 Lppos         |
| ENSMUSG00000102716 | 16022 Gm5099        |
| ENSMUSG00000022129 | 16023 Dct           |
| ENSMUSG00000022987 | 16024 Zfp641        |
| ENSMUSG00000030699 | 16025 Tbx6          |
| ENSMUSG00000081853 | 16026 Gm13735       |
| ENSMUSG00000103454 | 16027 Gm38098       |
| ENSMUSG00000024347 | 16028 Psd2          |
| ENSMUSG00000023829 | 16029 Slc22a1       |
| ENSMUSG00000011171 | 16030 Vipr2         |
| ENSMUSG00000015787 | 16031 Abo           |
| ENSMUSG00000042857 | 16032 Gm9776        |
| ENSMUSG00000036972 | 16033 Zic4          |
| ENSMUSG00000000530 | 16034 Acvrl1        |
| ENSMUSG00000108270 | 16035 RP23-109C11.1 |
| ENSMUSG00000068009 | 16036 Bpifb6        |
| ENSMUSG00000048188 | 16037 Gm8181        |
| ENSMUSG00000083200 | 16038 Gm15066       |
| ENSMUSG00000089267 | 16039 Gm22890       |
| ENSMUSG00000062036 | 16040 Gm19518       |
| ENSMUSG00000107341 | 16041 1700065J11Rik |
| ENSMUSG00000098137 | 16042 Gm26919       |

|                     |                     |
|---------------------|---------------------|
| ENSMUSG00000024388  | 16043 Myo7b         |
| ENSMUSG00000040489  | 16044 Sox30         |
| ENSMUSG00000079889  | 16045 Gm11951       |
| ENSMUSG00000044628  | 16046 Rnf208        |
| ENSMUSG00000021732  | 16047 Fgf10         |
| ENSMUSG00000083985  | 16048 Gm12468       |
| ENSMUSG00000098650  | 16049 Gm28048       |
| ENSMUSG00000100779  | 16050 Gm29292       |
| ENSMUSG00000074892  | 16051 B3galt5       |
| ENSMUSG00000097819  | 16052 Gm26813       |
| ENSMUSG00000022262  | 16053 Dnah5         |
| ENSMUSG00000018554  | 16054 Ybx2          |
| ENSMUSG00000095845  | 16055 Gm5741        |
| ENSMUSG00000051832  | 16056 E230016K23Rik |
| ENSMUSG00000004231  | 16057 Pax2          |
| ENSMUSG00000049539  | 16058 Hist1h1a      |
| ENSMUSG00000038543  | 16059 BC028528      |
| ENSMUSG00000095812  | 16060 Gm5473        |
| ENSMUSG000000100781 | 16061 Gm29481       |
| ENSMUSG000000106915 | 16062 Gm42655       |
| ENSMUSG00000028463  | 16063 Car9          |
| ENSMUSG00000073778  | 16064 Faddos        |
| ENSMUSG00000004933  | 16065 Matk          |
| ENSMUSG00000073787  | 16066 Gm10575       |
| ENSMUSG00000043223  | 16067 Gm4835        |
| ENSMUSG00000037681  | 16068 Esyt3         |
| ENSMUSG000000101608 | 16069 Gm28652       |
| ENSMUSG00000086162  | 16070 Gm16342       |
| ENSMUSG00000054200  | 16071 Ffar4         |
| ENSMUSG00000038167  | 16072 Plekhg6       |
| ENSMUSG00000045467  | 16073 Ttll13        |
| ENSMUSG00000061863  | 16074 Gm6822        |
| ENSMUSG00000097794  | 16075 Gm2990        |
| ENSMUSG000000100180 | 16076 Gm28140       |
| ENSMUSG00000025900  | 16077 Rp1           |
| ENSMUSG00000024901  | 16078 Peli3         |
| ENSMUSG00000098192  | 16079 Gm3534        |
| ENSMUSG000000101268 | 16080 2010310C07Rik |
| ENSMUSG00000050043  | 16081 Tmx2          |
| ENSMUSG000000107907 | 16082 RP23-249G11.4 |
| ENSMUSG00000097842  | 16083 9330104G04Rik |
| ENSMUSG00000030792  | 16084 Dkk1          |

|                    |                     |
|--------------------|---------------------|
| ENSMUSG00000037188 | 16085 Grhl3         |
| ENSMUSG00000097777 | 16086 Gm16794       |
| ENSMUSG00000100094 | 16087 1810008I18Rik |
| ENSMUSG00000038486 | 16088 Sv2a          |
| ENSMUSG00000101545 | 16089 Gm4373        |
| ENSMUSG00000104341 | 16090 Gm37688       |
| ENSMUSG00000086373 | 16091 Gm11978       |
| ENSMUSG00000106261 | 16092 Gm34086       |
| ENSMUSG00000107028 | 16093 Gm5043        |
| ENSMUSG00000084214 | 16094 Gm14825       |
| ENSMUSG00000049037 | 16095 Clec4a1       |
| ENSMUSG00000027562 | 16096 Car2          |
| ENSMUSG00000097936 | 16097 Gm4819        |
| ENSMUSG00000030745 | 16098 Il21r         |
| ENSMUSG00000074252 | 16099 Gm10654       |
| ENSMUSG00000063129 | 16100 Aldoart2      |
| ENSMUSG00000106398 | 16101 Gm43357       |
| ENSMUSG00000106301 | 16102 Gm8365        |
| ENSMUSG00000072875 | 16103 Gpr27         |
| ENSMUSG00000074215 | 16104 Gm10643       |
| ENSMUSG00000052371 | 16105 Hoxd3os1      |
| ENSMUSG00000043003 | 16106 Rasef         |
| ENSMUSG00000021994 | 16107 Wnt5a         |
| ENSMUSG00000081332 | 16108 Gm12664       |
| ENSMUSG00000053368 | 16109 Rxfp2         |
| ENSMUSG00000058625 | 16110 Gm17383       |
| ENSMUSG00000033508 | 16111 Asprv1        |
| ENSMUSG00000085683 | 16112 9130409J20Rik |
| ENSMUSG00000069874 | 16113 Irgm2         |
| ENSMUSG00000009216 | 16114 Fam163b       |
| ENSMUSG00000042240 | 16115 Crybb2        |
| ENSMUSG00000106534 | 16116 Gm6366        |
| ENSMUSG00000050295 | 16117 Foxc1         |
| ENSMUSG00000061833 | 16118 Gm6311        |
| ENSMUSG00000040838 | 16119 Gm11639       |
| ENSMUSG00000032021 | 16120 Crtam         |
| ENSMUSG00000053830 | 16121 Gm9923        |
| ENSMUSG00000085237 | 16122 Gm15406       |
| ENSMUSG00000103839 | 16123 Gm37607       |
| ENSMUSG00000105127 | 16124 Gm42470       |
| ENSMUSG00000039956 | 16125 Mrap          |
| ENSMUSG00000102278 | 16126 Gm37145       |



|                     |                     |
|---------------------|---------------------|
| ENSMUSG00000028337  | 16127 Coro2a        |
| ENSMUSG00000029370  | 16128 Rassf6        |
| ENSMUSG00000086765  | 16129 Gm11827       |
| ENSMUSG000000105600 | 16130 Gm5987        |
| ENSMUSG00000051457  | 16131 Spn           |
| ENSMUSG00000034205  | 16132 Loxl2         |
| ENSMUSG00000045506  | 16133 A930002H24Rik |
| ENSMUSG00000039853  | 16134 Trim14        |
| ENSMUSG00000091785  | 16135 Rpl29-ps5     |
| ENSMUSG00000026390  | 16136 Marco         |
| ENSMUSG00000091083  | 16137 Gm4535        |
| ENSMUSG00000080944  | 16138 Gm12967       |
| ENSMUSG00000089876  | 16139 Tmem102       |
| ENSMUSG00000075591  | 16140 Gm10874       |
| ENSMUSG00000015468  | 16141 Notch4        |
| ENSMUSG00000082549  | 16142 Gm14813       |
| ENSMUSG00000098219  | 16143 Gm7481        |
| ENSMUSG00000083505  | 16144 Gm7541        |
| ENSMUSG000000103723 | 16145 Gm37095       |
| ENSMUSG00000091412  | 16146 Gm2895        |
| ENSMUSG00000099858  | 16147 Gm6652        |
| ENSMUSG00000098111  | 16148 Gm4654        |
| ENSMUSG00000072966  | 16149 Gprasp2       |
| ENSMUSG00000021379  | 16150 Id4           |
| ENSMUSG00000035407  | 16151 Kank4         |
| ENSMUSG00000085791  | 16152 Rpl30-ps9     |
| ENSMUSG00000087351  | 16153 Gm11464       |
| ENSMUSG00000022824  | 16154 Muc13         |
| ENSMUSG00000031853  | 16155 BC021891      |
| ENSMUSG00000009092  | 16156 Derl3         |
| ENSMUSG00000058396  | 16157 Gpr182        |
| ENSMUSG00000071713  | 16158 Csf2rb        |
| ENSMUSG00000026725  | 16159 Tnn           |
| ENSMUSG00000052403  | 16160 Fcnaos        |
| ENSMUSG00000026409  | 16161 Pfkfb2        |
| ENSMUSG00000004266  | 16162 Ptpn6         |
| ENSMUSG000000104786 | 16163 Gm43573       |
| ENSMUSG000000101856 | 16164 1700096K18Rik |
| ENSMUSG00000072723  | 16165 Gm10044       |
| ENSMUSG00000083392  | 16166 Gm6335        |
| ENSMUSG00000028730  | 16167 Cfap57        |
| ENSMUSG00000010797  | 16168 Wnt2          |

|                    |                     |
|--------------------|---------------------|
| ENSMUSG00000048794 | 16169 Ccdc37        |
| ENSMUSG00000083016 | 16170 Gm12618       |
| ENSMUSG00000099839 | 16171 Gm29374       |
| ENSMUSG00000044037 | 16172 Als2cl        |
| ENSMUSG00000102158 | 16173 Gm34342       |
| ENSMUSG00000100337 | 16174 Gm5066        |
| ENSMUSG00000101862 | 16175 Gm8918        |
| ENSMUSG00000021280 | 16176 Exoc3l4       |
| ENSMUSG00000097015 | 16177 Gm26705       |
| ENSMUSG00000097429 | 16178 Gm26520       |
| ENSMUSG00000086721 | 16179 Gm13750       |
| ENSMUSG00000099631 | 16180 Gm8641        |
| ENSMUSG00000104279 | 16181 Gm38300       |
| ENSMUSG00000101304 | 16182 Plet1os       |
| ENSMUSG00000081459 | 16183 Llph-ps1      |
| ENSMUSG00000066090 | 16184 Insl5         |
| ENSMUSG00000102085 | 16185 4930435C17Rik |
| ENSMUSG00000028803 | 16186 Nipal3        |
| ENSMUSG00000030098 | 16187 Grip2         |
| ENSMUSG00000071633 | 16188 Gm4952        |
| ENSMUSG00000040525 | 16189 Cblc          |
| ENSMUSG00000031870 | 16190 Pgr           |
| ENSMUSG00000096351 | 16191 Samd11        |
| ENSMUSG00000037705 | 16192 Tecta         |
| ENSMUSG00000108276 | 16193 RP23-200M5.6  |
| ENSMUSG00000020053 | 16194 Igf1          |
| ENSMUSG00000098073 | 16195 Gm8048        |
| ENSMUSG00000095168 | 16196 Gm4795        |
| ENSMUSG00000093967 | 16197 Gm26180       |
| ENSMUSG00000084021 | 16198 Gm5832        |
| ENSMUSG00000064267 | 16199 Hvcn1         |
| ENSMUSG00000071001 | 16200 Hrct1         |
| ENSMUSG00000056753 | 16201 C330011M18Rik |
| ENSMUSG00000100627 | 16202 A830008E24Rik |
| ENSMUSG00000081611 | 16203 Gm13651       |
| ENSMUSG00000017740 | 16204 Slc12a5       |
| ENSMUSG00000020892 | 16205 Aloxe3        |
| ENSMUSG00000014453 | 16206 Blk           |
| ENSMUSG00000074997 | 16207 Pin1rt1       |
| ENSMUSG00000054939 | 16208 Zfp174        |
| ENSMUSG00000063727 | 16209 Tnfrsf11b     |
| ENSMUSG00000032323 | 16210 Cyp11a1       |

|                    |                     |
|--------------------|---------------------|
| ENSMUSG00000107644 | 16211 RP24-327I4.6  |
| ENSMUSG00000095082 | 16212 Gm15091       |
| ENSMUSG00000028459 | 16213 Cd72          |
| ENSMUSG00000102544 | 16214 Gm5103        |
| ENSMUSG00000083998 | 16215 Prdx2-rs3     |
| ENSMUSG00000102785 | 16216 Gm2447        |
| ENSMUSG00000098865 | 16217 Gm27702       |
| ENSMUSG00000096157 | 16218 Gm5472        |
| ENSMUSG00000081210 | 16219 Gm12933       |
| ENSMUSG00000105802 | 16220 Gm43012       |
| ENSMUSG00000082617 | 16221 Smt3h2-ps     |
| ENSMUSG00000083900 | 16222 Gm13294       |
| ENSMUSG00000078143 | 16223 Gm17344       |
| ENSMUSG00000028950 | 16224 Tas1r1        |
| ENSMUSG00000028417 | 16225 Tal2          |
| ENSMUSG00000082329 | 16226 Gm14287       |
| ENSMUSG00000058463 | 16227 Gm5471        |
| ENSMUSG00000090891 | 16228 D6Ertd527e    |
| ENSMUSG00000034786 | 16229 Gpsm3         |
| ENSMUSG00000024313 | 16230 Mep1b         |
| ENSMUSG00000100465 | 16231 Gm29264       |
| ENSMUSG00000085633 | 16232 Bloc1s6os     |
| ENSMUSG00000097977 | 16233 Gm5652        |
| ENSMUSG00000096982 | 16234 Redrum        |
| ENSMUSG00000082076 | 16235 Gm8659        |
| ENSMUSG00000103149 | 16236 AA914427      |
| ENSMUSG00000079244 | 16237 Gm5622        |
| ENSMUSG00000069516 | 16238 Lyz2          |
| ENSMUSG00000027887 | 16239 Sypl2         |
| ENSMUSG00000107750 | 16240 RP23-336L12.3 |
| ENSMUSG00000107994 | 16241 RP24-179I4.3  |
| ENSMUSG00000040723 | 16242 Rcsd1         |
| ENSMUSG00000026220 | 16243 Slc16a14      |
| ENSMUSG00000106103 | 16244 Gm43081       |
| ENSMUSG00000020062 | 16245 Slc5a8        |
| ENSMUSG00000021640 | 16246 Naip1         |
| ENSMUSG00000082029 | 16247 H3f3c         |
| ENSMUSG00000096221 | 16248 1500002C15Rik |
| ENSMUSG00000006342 | 16249 Susd2         |
| ENSMUSG00000097448 | 16250 Platr22       |
| ENSMUSG00000084927 | 16251 Gm5724        |
| ENSMUSG00000087637 | 16252 Gm11986       |

|                     |                     |
|---------------------|---------------------|
| ENSMUSG00000078915  | 16253 Hsp25-ps1     |
| ENSMUSG00000045667  | 16254 Smtnl2        |
| ENSMUSG00000082543  | 16255 Gm14336       |
| ENSMUSG00000085905  | 16256 Gm14273       |
| ENSMUSG00000016942  | 16257 Tmprss6       |
| ENSMUSG00000011632  | 16258 Pinlyp        |
| ENSMUSG00000083539  | 16259 Gm12466       |
| ENSMUSG00000035226  | 16260 Rims4         |
| ENSMUSG00000042842  | 16261 Serpinb6b     |
| ENSMUSG000000107598 | 16262 RP23-301K21.1 |
| ENSMUSG00000040138  | 16263 Ndp           |
| ENSMUSG00000030781  | 16264 Slc5a2        |
| ENSMUSG00000021620  | 16265 Acot12        |
| ENSMUSG00000080895  | 16266 Gm11645       |
| ENSMUSG00000081720  | 16267 Gm12391       |
| ENSMUSG00000088025  | 16268 Rprl3         |
| ENSMUSG00000045064  | 16269 Zc2hc1c       |
| ENSMUSG000000106243 | 16270 Gm5050        |
| ENSMUSG00000024459  | 16271 H2-M5         |
| ENSMUSG00000070960  | 16272 Gm19680       |
| ENSMUSG00000055748  | 16273 Gsdmc4        |
| ENSMUSG00000026787  | 16274 Gad2          |
| ENSMUSG00000042282  | 16275 Gucy2f        |
| ENSMUSG00000042371  | 16276 Slc5a10       |
| ENSMUSG00000005628  | 16277 Tmod4         |
| ENSMUSG00000030209  | 16278 Grin2b        |
| ENSMUSG00000049491  | 16279 Slc36a3       |
| ENSMUSG000000100837 | 16280 1700063D05Rik |
| ENSMUSG00000085995  | 16281 Gm2788        |
| ENSMUSG00000057135  | 16282 Scimp         |
| ENSMUSG00000091905  | 16283 Gm6395        |
| ENSMUSG00000093553  | 16284 Gm20633       |
| ENSMUSG00000049460  | 16285 Gm8396        |
| ENSMUSG00000048096  | 16286 Lmod1         |
| ENSMUSG00000081556  | 16287 Gm15778       |
| ENSMUSG00000070424  | 16288 Art5          |
| ENSMUSG00000081590  | 16289 Gm14413       |
| ENSMUSG00000031803  | 16290 B3gnt3        |
| ENSMUSG00000081136  | 16291 Gm12990       |
| ENSMUSG000000108676 | 16292 RP23-353F16.3 |
| ENSMUSG00000094557  | 16293 Rpl35a-ps7    |
| ENSMUSG00000012187  | 16294 Mogat1        |

|                     |                     |
|---------------------|---------------------|
| ENSMUSG00000058216  | 16295 BC021614      |
| ENSMUSG00000022543  | 16296 4930451G09Rik |
| ENSMUSG00000021974  | 16297 Fgf9          |
| ENSMUSG00000062296  | 16298 Trank1        |
| ENSMUSG00000059498  | 16299 Fcgr3         |
| ENSMUSG00000061486  | 16300 Gm5161        |
| ENSMUSG00000048616  | 16301 Nog           |
| ENSMUSG00000029015  | 16302 Slc26a5       |
| ENSMUSG00000054909  | 16303 Wbscr25       |
| ENSMUSG000000106089 | 16304 Gm9419        |
| ENSMUSG00000090034  | 16305 Gm15917       |
| ENSMUSG00000082360  | 16306 Gm8814        |
| ENSMUSG00000043484  | 16307 Gm5867        |
| ENSMUSG00000040614  | 16308 Nlrp9c        |
| ENSMUSG00000001588  | 16309 Acap1         |
| ENSMUSG000000101523 | 16310 Gm10031       |
| ENSMUSG00000099188  | 16311 Gm27248       |
| ENSMUSG00000029659  | 16312 Medag         |
| ENSMUSG00000091556  | 16313 Gm14569       |
| ENSMUSG00000028593  | 16314 9430007A20Rik |
| ENSMUSG000000108530 | 16315 RP23-259N3.1  |
| ENSMUSG00000072688  | 16316 Gm10399       |
| ENSMUSG00000026715  | 16317 Serpinc1      |
| ENSMUSG00000038319  | 16318 Kcnh2         |
| ENSMUSG00000063430  | 16319 Wscd2         |
| ENSMUSG00000089945  | 16320 Pakap         |
| ENSMUSG00000023274  | 16321 Cd4           |
| ENSMUSG000000105317 | 16322 Gbp2-ps       |
| ENSMUSG00000097827  | 16323 5330439K02Rik |
| ENSMUSG00000089997  | 16324 1810020O05Rik |
| ENSMUSG00000049571  | 16325 Cfp46         |
| ENSMUSG00000032065  | 16326 Tex12         |
| ENSMUSG00000083089  | 16327 Gm4760        |
| ENSMUSG00000013367  | 16328 Iglon5        |
| ENSMUSG000000108231 | 16329 RP23-263B18.5 |
| ENSMUSG00000083964  | 16330 Gm14122       |
| ENSMUSG00000083646  | 16331 Gm6088        |
| ENSMUSG00000081622  | 16332 Gm5937        |
| ENSMUSG00000083686  | 16333 Gm13504       |
| ENSMUSG00000073652  | 16334 Apol7d        |
| ENSMUSG00000025468  | 16335 Caly          |
| ENSMUSG00000035112  | 16336 Wnk4          |

|                    |                     |
|--------------------|---------------------|
| ENSMUSG00000055960 | 16337 Skint4        |
| ENSMUSG00000061601 | 16338 Pclo          |
| ENSMUSG00000043398 | 16339 Gpr135        |
| ENSMUSG00000036168 | 16340 Ccdc38        |
| ENSMUSG00000044433 | 16341 Camsap3       |
| ENSMUSG00000083113 | 16342 Rpl10-ps4     |
| ENSMUSG00000056144 | 16343 Trim34a       |
| ENSMUSG00000019987 | 16344 Arg1          |
| ENSMUSG00000083441 | 16345 Gm15329       |
| ENSMUSG00000010142 | 16346 Tnfrsf13b     |
| ENSMUSG00000083754 | 16347 Gm7803        |
| ENSMUSG00000052767 | 16348 Gm12703       |
| ENSMUSG00000051456 | 16349 Hspb3         |
| ENSMUSG00000083373 | 16350 Gm13392       |
| ENSMUSG00000088185 | 16351 Scarna2       |
| ENSMUSG00000097941 | 16352 Gm8984        |
| ENSMUSG00000083052 | 16353 Gm12285       |
| ENSMUSG00000028681 | 16354 Ptch2         |
| ENSMUSG00000015396 | 16355 Cd83          |
| ENSMUSG00000084203 | 16356 Gm15593       |
| ENSMUSG00000106188 | 16357 Gm9710        |
| ENSMUSG00000097123 | 16358 Gm6297        |
| ENSMUSG00000103845 | 16359 Gm19026       |
| ENSMUSG00000026222 | 16360 Sp100         |
| ENSMUSG00000078490 | 16361 Cfap74        |
| ENSMUSG00000026117 | 16362 Zap70         |
| ENSMUSG00000097247 | 16363 1500012K07Rik |
| ENSMUSG00000055452 | 16364 Gm7353        |
| ENSMUSG00000099178 | 16365 Gm8669        |
| ENSMUSG00000028314 | 16366 Toporsl       |
| ENSMUSG00000081706 | 16367 Gm7927        |
| ENSMUSG00000097654 | 16368 Gm26714       |
| ENSMUSG00000074863 | 16369 Platr25       |
| ENSMUSG00000089879 | 16370 4930448H16Rik |
| ENSMUSG00000075267 | 16371 Dfnb59        |
| ENSMUSG00000107920 | 16372 RP23-272K20.2 |
| ENSMUSG00000008590 | 16373 Htr3b         |
| ENSMUSG00000095614 | 16374 Gm6291        |
| ENSMUSG00000091358 | 16375 Speer5-ps1    |
| ENSMUSG00000027570 | 16376 Col9a3        |
| ENSMUSG00000028141 | 16377 Oaz3          |
| ENSMUSG00000074184 | 16378 Smt3h2-ps2    |

|                    |                     |
|--------------------|---------------------|
| ENSMUSG00000092571 | 16379 Gm4134        |
| ENSMUSG00000037362 | 16380 Nov           |
| ENSMUSG00000087479 | 16381 Gm16835       |
| ENSMUSG00000092124 | 16382 B930094E09Rik |
| ENSMUSG00000100747 | 16383 1700084E18Rik |
| ENSMUSG00000030399 | 16384 Ckm           |
| ENSMUSG00000036931 | 16385 Nfkbid        |
| ENSMUSG00000018845 | 16386 Unc45b        |
| ENSMUSG00000083921 | 16387 Gm15750       |
| ENSMUSG00000038517 | 16388 Tbkbp1        |
| ENSMUSG00000022097 | 16389 Sftpc         |
| ENSMUSG00000081083 | 16390 Gm6079        |
| ENSMUSG00000095803 | 16391 Gm20796       |
| ENSMUSG00000087026 | 16392 A230103J11Rik |
| ENSMUSG00000024600 | 16393 Slc27a6       |
| ENSMUSG00000047180 | 16394 Neurl3        |
| ENSMUSG00000028109 | 16395 Hormad1       |
| ENSMUSG00000084144 | 16396 Gm12516       |
| ENSMUSG00000034115 | 16397 Scn11a        |
| ENSMUSG00000085984 | 16398 1700001G11Rik |
| ENSMUSG00000037280 | 16399 Galnt6        |
| ENSMUSG00000073424 | 16400 Cyp4f15       |
| ENSMUSG00000054383 | 16401 Pnma1         |
| ENSMUSG00000035692 | 16402 Isg15         |
| ENSMUSG00000086522 | 16403 Gm4473        |
| ENSMUSG00000081924 | 16404 Gm11191       |
| ENSMUSG00000018168 | 16405 Ikzf3         |
| ENSMUSG00000081167 | 16406 Gm8880        |
| ENSMUSG00000093865 | 16407 Lrit3         |
| ENSMUSG00000082687 | 16408 Gm11474       |
| ENSMUSG00000018008 | 16409 Cyth4         |
| ENSMUSG00000038843 | 16410 Gcnt1         |
| ENSMUSG00000097106 | 16411 Rpl31-ps23    |
| ENSMUSG00000107984 | 16412 RP23-446E21.4 |
| ENSMUSG00000096995 | 16413 2810029C07Rik |
| ENSMUSG00000081946 | 16414 Gm11472       |
| ENSMUSG00000102976 | 16415 Zc3h11a       |
| ENSMUSG00000081923 | 16416 Gm9062        |
| ENSMUSG00000020096 | 16417 Tbata         |
| ENSMUSG00000098158 | 16418 Gm4804        |
| ENSMUSG00000066000 | 16419 2610305D13Rik |
| ENSMUSG00000002578 | 16420 Ikzf4         |

|                    |                     |
|--------------------|---------------------|
| ENSMUSG00000022455 | 16421 Wbp2nl        |
| ENSMUSG00000074158 | 16422 9830147E19Rik |
| ENSMUSG00000082480 | 16423 Gm11687       |
| ENSMUSG00000097014 | 16424 Gm26706       |
| ENSMUSG00000054944 | 16425 5330416C01Rik |
| ENSMUSG00000046694 | 16426 Fam46b        |
| ENSMUSG00000074639 | 16427 BC089597      |
| ENSMUSG00000097321 | 16428 1700028E10Rik |
| ENSMUSG00000083679 | 16429 Gm12892       |
| ENSMUSG00000082655 | 16430 Gm7857        |
| ENSMUSG00000067206 | 16431 Lrrc66        |
| ENSMUSG00000083169 | 16432 Gm6580        |
| ENSMUSG00000107726 | 16433 RP23-47A6.5   |
| ENSMUSG00000081683 | 16434 Fzd10         |
| ENSMUSG00000102256 | 16435 Gm38258       |
| ENSMUSG00000052117 | 16436 D630039A03Rik |
| ENSMUSG00000082524 | 16437 Gm6272        |
| ENSMUSG00000071516 | 16438 Hist1h2ai     |
| ENSMUSG00000103323 | 16439 Gm21631       |
| ENSMUSG00000013483 | 16440 Card14        |
| ENSMUSG00000029720 | 16441 Gm20605       |
| ENSMUSG00000099354 | 16442 1700124L16Rik |
| ENSMUSG00000079410 | 16443 Gm2897        |
| ENSMUSG00000043850 | 16444 Clrn1         |
| ENSMUSG00000107327 | 16445 Gm7478        |
| ENSMUSG00000031142 | 16446 Cacna1f       |
| ENSMUSG00000029597 | 16447 Sds           |
| ENSMUSG00000051354 | 16448 Samd3         |
| ENSMUSG00000081034 | 16449 Gm5944        |
| ENSMUSG00000107402 | 16450 RP23-285C21.7 |
| ENSMUSG00000049526 | 16451 Tmem202       |
| ENSMUSG00000082580 | 16452 Gm13182       |
| ENSMUSG00000099465 | 16453 Gm3830        |
| ENSMUSG00000081151 | 16454 Gm11448       |
| ENSMUSG00000091361 | 16455 Gm5277        |
| ENSMUSG00000106662 | 16456 Gm43034       |
| ENSMUSG00000102193 | 16457 Gm7299        |
| ENSMUSG00000081744 | 16458 Gm5721        |
| ENSMUSG00000090936 | 16459 Gm17705       |
| ENSMUSG00000079071 | 16460 Gm14085       |
| ENSMUSG00000050468 | 16461 Astl          |
| ENSMUSG00000020175 | 16462 Rab36         |



|                    |                     |
|--------------------|---------------------|
| ENSMUSG00000045928 | 16463 4933440M02Rik |
| ENSMUSG00000029602 | 16464 Rasal1        |
| ENSMUSG00000099342 | 16465 Gm18180       |
| ENSMUSG00000070777 | 16466 Ceacam20      |
| ENSMUSG00000101711 | 16467 Gm28306       |
| ENSMUSG00000084275 | 16468 Gm5396        |
| ENSMUSG00000078872 | 16469 Gm14401       |
| ENSMUSG00000043648 | 16470 Pld6          |
| ENSMUSG00000082458 | 16471 Gm9430        |
| ENSMUSG00000086867 | 16472 Gm4577        |
| ENSMUSG00000061462 | 16473 Obscn         |
| ENSMUSG00000080818 | 16474 Gm9434        |
| ENSMUSG00000051159 | 16475 Cited1        |
| ENSMUSG00000097414 | 16476 B130046B21Rik |
| ENSMUSG00000090535 | 16477 Gm8540        |
| ENSMUSG00000087624 | 16478 9230111E07Rik |
| ENSMUSG00000097376 | 16479 Gm8705        |
| ENSMUSG00000081262 | 16480 Gm12261       |
| ENSMUSG00000059743 | 16481 Fdps          |
| ENSMUSG00000107352 | 16482 Gm43660       |
| ENSMUSG00000022176 | 16483 Rem2          |
| ENSMUSG00000095253 | 16484 Zfp799        |
| ENSMUSG00000082545 | 16485 Gm12196       |
| ENSMUSG00000067724 | 16486 Gbx1          |
| ENSMUSG00000105957 | 16487 Gm43254       |
| ENSMUSG00000025333 | 16488 Gpr143        |
| ENSMUSG00000108163 | 16489 RP23-240C17.3 |
| ENSMUSG00000042532 | 16490 Golga7b       |
| ENSMUSG00000082039 | 16491 Gm15653       |
| ENSMUSG00000034087 | 16492 Nlrp4b        |
| ENSMUSG00000039632 | 16493 Ccdc151       |
| ENSMUSG00000081781 | 16494 Gm14753       |
| ENSMUSG00000056586 | 16495 Zar1l         |
| ENSMUSG00000104811 | 16496 Gm43644       |
| ENSMUSG00000069310 | 16497 Hist1h3c      |
| ENSMUSG00000037016 | 16498 Frem2         |
| ENSMUSG00000084300 | 16499 Gm6954        |
| ENSMUSG00000067714 | 16500 Lpar5         |
| ENSMUSG00000031831 | 16501 Dnaaf1        |
| ENSMUSG00000006235 | 16502 Epor          |
| ENSMUSG00000034810 | 16503 Scn7a         |
| ENSMUSG00000094886 | 16504 Gm10784       |

|                    |                |
|--------------------|----------------|
| ENSMUSG00000078495 | 16505 Gm13157  |
| ENSMUSG00000068011 | 16506 Mkrn2os  |
| ENSMUSG00000047502 | 16507 Mroh7    |
| ENSMUSG00000030834 | 16508 Abcc6    |
| ENSMUSG00000098057 | 16509 Gm6283   |
| ENSMUSG00000097788 | 16510 Gm16596  |
| ENSMUSG00000083661 | 16511 Gm11473  |
| ENSMUSG00000099083 | 16512 Atf7     |
| ENSMUSG00000080777 | 16513 Gm15365  |
| ENSMUSG00000060981 | 16514 Hist1h4h |
| ENSMUSG00000081428 | 16515 Tpt1-ps2 |
| ENSMUSG00000098123 | 16516 Gm4518   |
| ENSMUSG00000042804 | 16517 Gpr153   |
| ENSMUSG00000082865 | 16518 Gm14745  |
| ENSMUSG00000101298 | 16519 Gm28308  |
| ENSMUSG00000038346 | 16520 Zfp384   |
| ENSMUSG00000035429 | 16521 Ptprh    |
| ENSMUSG00000078905 | 16522 Gm14393  |
| ENSMUSG00000080979 | 16523 Gm13675  |
| ENSMUSG00000074357 | 16524 AA386476 |
| ENSMUSG00000027350 | 16525 Chgb     |
| ENSMUSG00000001027 | 16526 Scn4a    |
| ENSMUSG00000092802 | 16527 Gm26460  |
| ENSMUSG00000057685 | 16528 Gm8526   |
| ENSMUSG00000086926 | 16529 Gm6226   |
| ENSMUSG00000074930 | 16530 Gm13981  |
| ENSMUSG00000032482 | 16531 Cspg5    |
| ENSMUSG00000084116 | 16532 Gm12460  |
| ENSMUSG00000031144 | 16533 Syp      |
| ENSMUSG00000040350 | 16534 Trim7    |
| ENSMUSG00000091721 | 16535 Gm5549   |
| ENSMUSG00000106864 | 16536 Gtf3c2   |
| ENSMUSG00000081096 | 16537 Gm12691  |
| ENSMUSG00000089984 | 16538 Fbxo24   |
| ENSMUSG00000085232 | 16539 Gm11962  |
| ENSMUSG00000106391 | 16540 Gm42690  |
| ENSMUSG00000053297 | 16541 Al854703 |
| ENSMUSG00000102666 | 16542 Gm8599   |
| ENSMUSG00000081221 | 16543 Gm14760  |
| ENSMUSG00000069227 | 16544 Gprin1   |
| ENSMUSG00000074923 | 16545 Pak6     |
| ENSMUSG00000036964 | 16546 Trim17   |

|                     |                     |
|---------------------|---------------------|
| ENSMUSG00000038060  | 16547 Dlec1         |
| ENSMUSG00000026870  | 16548 Cutal         |
| ENSMUSG00000022220  | 16549 Adcy4         |
| ENSMUSG00000087027  | 16550 Gm13206       |
| ENSMUSG00000090751  | 16551 Vmn2r63       |
| ENSMUSG00000050370  | 16552 Ch25h         |
| ENSMUSG00000032297  | 16553 Celf6         |
| ENSMUSG00000047875  | 16554 Gpr157        |
| ENSMUSG00000098077  | 16555 Gm4960        |
| ENSMUSG00000082534  | 16556 Gm13712       |
| ENSMUSG00000026205  | 16557 Slc23a3       |
| ENSMUSG00000026070  | 16558 Il18r1        |
| ENSMUSG000000103373 | 16559 Gm37238       |
| ENSMUSG00000021187  | 16560 Tc2n          |
| ENSMUSG00000008496  | 16561 Pou2f2        |
| ENSMUSG000000089829 | 16562 Gm16565       |
| ENSMUSG00000049719  | 16563 Prss46        |
| ENSMUSG00000037593  | 16564 BC030499      |
| ENSMUSG00000042078  | 16565 Svop          |
| ENSMUSG000000107868 | 16566 RP23-46L17.6  |
| ENSMUSG00000093577  | 16567 Gm20632       |
| ENSMUSG00000086076  | 16568 Ncr3-ps       |
| ENSMUSG00000084168  | 16569 Atp5l2-ps     |
| ENSMUSG00000087544  | 16570 Gm13923       |
| ENSMUSG00000096712  | 16571 Gm15454       |
| ENSMUSG000000104954 | 16572 Gm42694       |
| ENSMUSG00000074826  | 16573 Gm10767       |
| ENSMUSG00000061702  | 16574 Tmem91        |
| ENSMUSG000000104667 | 16575 Gm4961        |
| ENSMUSG00000093416  | 16576 Gm18294       |
| ENSMUSG00000099444  | 16577 Gm29240       |
| ENSMUSG00000037664  | 16578 Cdkn1c        |
| ENSMUSG00000083161  | 16579 Gm11427       |
| ENSMUSG00000056617  | 16580 4931429L15Rik |
| ENSMUSG00000060985  | 16581 Tdrd5         |
| ENSMUSG00000078889  | 16582 Gm14288       |
| ENSMUSG00000050824  | 16583 Sstr5         |
| ENSMUSG00000063751  | 16584 Platr8        |
| ENSMUSG00000021509  | 16585 Slc25a48      |
| ENSMUSG00000059912  | 16586 Rpl21-ps6     |
| ENSMUSG00000082134  | 16587 Gm15236       |
| ENSMUSG00000060044  | 16588 Tmem26        |

|                    |                     |
|--------------------|---------------------|
| ENSMUSG00000060128 | 16589 Gm2710        |
| ENSMUSG00000025272 | 16590 Tro           |
| ENSMUSG00000097433 | 16591 Gm26781       |
| ENSMUSG00000028427 | 16592 Aqp7          |
| ENSMUSG00000040412 | 16593 5330417C22Rik |
| ENSMUSG00000024526 | 16594 Cidea         |
| ENSMUSG00000082660 | 16595 Gm14612       |
| ENSMUSG00000024451 | 16596 Arap3         |
| ENSMUSG00000046546 | 16597 Fam43a        |
| ENSMUSG00000082782 | 16598 Gm5319        |
| ENSMUSG00000045394 | 16599 Epcam         |
| ENSMUSG00000032327 | 16600 Stra6         |
| ENSMUSG00000097439 | 16601 Gm16754       |
| ENSMUSG00000038916 | 16602 Soga3         |
| ENSMUSG00000036216 | 16603 Leap2         |
| ENSMUSG00000084015 | 16604 Gm14175       |
| ENSMUSG00000064016 | 16605 Gm648         |
| ENSMUSG00000097529 | 16606 Rp31-ps19     |
| ENSMUSG00000057346 | 16607 Apol9a        |
| ENSMUSG00000105729 | 16608 5330425B07Rik |
| ENSMUSG00000074060 | 16609 Fbxw15        |
| ENSMUSG00000081897 | 16610 Gm15067       |
| ENSMUSG00000027355 | 16611 Tmco5         |
| ENSMUSG00000098043 | 16612 Gm26980       |
| ENSMUSG00000050526 | 16613 4933406M09Rik |
| ENSMUSG00000084373 | 16614 Rps2-ps4      |
| ENSMUSG00000023247 | 16615 Guca2a        |
| ENSMUSG00000082790 | 16616 Gm12155       |
| ENSMUSG00000040483 | 16617 Xaf1          |
| ENSMUSG00000097403 | 16618 9230116N13Rik |
| ENSMUSG00000107008 | 16619 Gm2762        |
| ENSMUSG00000085227 | 16620 6330418K02Rik |
| ENSMUSG00000100783 | 16621 2310047D07Rik |
| ENSMUSG00000068227 | 16622 Il2rb         |
| ENSMUSG00000042641 | 16623 Rgs1          |
| ENSMUSG00000032854 | 16624 Ugt8a         |
| ENSMUSG00000086968 | 16625 4933431E20Rik |
| ENSMUSG00000062073 | 16626 Gm10109       |
| ENSMUSG00000097130 | 16627 Gm5262        |
| ENSMUSG00000001493 | 16628 Meox1         |
| ENSMUSG00000010651 | 16629 Acaa1b        |
| ENSMUSG00000097089 | 16630 Gm26879       |

|                    |                     |
|--------------------|---------------------|
| ENSMUSG00000046974 | 16631 BC053393      |
| ENSMUSG00000100707 | 16632 Gm28523       |
| ENSMUSG00000082919 | 16633 Gm12641       |
| ENSMUSG00000042678 | 16634 Myo15         |
| ENSMUSG00000027072 | 16635 Prg3          |
| ENSMUSG00000075031 | 16636 Hist1h2bb     |
| ENSMUSG00000097327 | 16637 E030030I06Rik |
| ENSMUSG00000014725 | 16638 Adam28        |
| ENSMUSG00000024479 | 16639 Mal2          |
| ENSMUSG00000096567 | 16640 Gm24098       |
| ENSMUSG00000041073 | 16641 Nacad         |
| ENSMUSG00000017390 | 16642 Aldoc         |
| ENSMUSG00000032892 | 16643 Rangrf        |
| ENSMUSG00000081625 | 16644 Rps12-ps7     |
| ENSMUSG00000083246 | 16645 Gm11839       |
| ENSMUSG00000082579 | 16646 Gm11979       |
| ENSMUSG00000041945 | 16647 Mfsd9         |
| ENSMUSG00000097155 | 16648 Gm26511       |
| ENSMUSG00000033210 | 16649 Slc9c1        |
| ENSMUSG00000033405 | 16650 Nudt15        |
| ENSMUSG00000104775 | 16651 Gm8182        |
| ENSMUSG00000105981 | 16652 2810428J06Rik |
| ENSMUSG00000030206 | 16653 Gsg1          |
| ENSMUSG00000039981 | 16654 Zc3h12d       |
| ENSMUSG00000042353 | 16655 Frem3         |
| ENSMUSG00000108763 | 16656 RP23-198F11.3 |
| ENSMUSG00000029155 | 16657 Spata18       |
| ENSMUSG00000097527 | 16658 1700112J16Rik |
| ENSMUSG00000094326 | 16659 Gm10045       |
| ENSMUSG00000013707 | 16660 Tnfaip8l2     |
| ENSMUSG00000096035 | 16661 Gm1045        |
| ENSMUSG00000082195 | 16662 Gm13034       |
| ENSMUSG00000100736 | 16663 Gm5147        |
| ENSMUSG00000058385 | 16664 Hist1h2bg     |
| ENSMUSG00000097515 | 16665 1700040D17Rik |
| ENSMUSG00000098215 | 16666 Gm7069        |
| ENSMUSG00000013928 | 16667 Thap8         |
| ENSMUSG00000020992 | 16668 4930512B01Rik |
| ENSMUSG00000098116 | 16669 Gm7191        |
| ENSMUSG00000057359 | 16670 Gm17494       |
| ENSMUSG00000063739 | 16671 Gm4963        |
| ENSMUSG00000084915 | 16672 C230037L18Rik |

|                    |                     |
|--------------------|---------------------|
| ENSMUSG00000029371 | 16673 Cxcl5         |
| ENSMUSG00000108078 | 16674 RP23-374N15.1 |
| ENSMUSG00000049515 | 16675 Espnl         |
| ENSMUSG00000042477 | 16676 Tfap2e        |
| ENSMUSG00000063409 | 16677 Lrrc43        |
| ENSMUSG00000108103 | 16678 RP23-418F10.1 |
| ENSMUSG00000052658 | 16679 5830454E08Rik |
| ENSMUSG00000074868 | 16680 Gm6478        |
| ENSMUSG00000054889 | 16681 Dsp           |
| ENSMUSG00000096086 | 16682 Gm4761        |
| ENSMUSG00000020787 | 16683 P2rx1         |
| ENSMUSG00000047746 | 16684 Fbxo40        |
| ENSMUSG00000082352 | 16685 Gm13228       |
| ENSMUSG00000106267 | 16686 Gm40319       |
| ENSMUSG00000078776 | 16687 9530053A07Rik |
| ENSMUSG00000082043 | 16688 Gm12848       |
| ENSMUSG00000107751 | 16689 RP24-95A6.1   |
| ENSMUSG00000038224 | 16690 Serpinf2      |
| ENSMUSG00000068631 | 16691 Gm7676        |
| ENSMUSG00000106568 | 16692 Gm42814       |
| ENSMUSG00000083284 | 16693 Gm13688       |
| ENSMUSG00000085295 | 16694 4930430E12Rik |
| ENSMUSG00000101258 | 16695 Gm29477       |
| ENSMUSG00000051980 | 16696 Casr          |
| ENSMUSG00000063166 | 16697 Gm5449        |
| ENSMUSG00000092201 | 16698 A530058N18Rik |
| ENSMUSG00000026452 | 16699 Syt2          |
| ENSMUSG00000037390 | 16700 Muc3          |
| ENSMUSG00000059395 | 16701 Nkapl         |
| ENSMUSG00000034035 | 16702 Ccdc17        |
| ENSMUSG00000042349 | 16703 Ikbke         |
| ENSMUSG00000095789 | 16704 Nupr1l        |
| ENSMUSG00000035486 | 16705 Plk5          |
| ENSMUSG00000003354 | 16706 Ccdc65        |
| ENSMUSG00000092137 | 16707 Gcom1         |
| ENSMUSG00000103116 | 16708 4930539M17Rik |
| ENSMUSG00000006711 | 16709 D130043K22Rik |
| ENSMUSG00000026147 | 16710 Col9a1        |
| ENSMUSG00000082141 | 16711 Gm11212       |
| ENSMUSG00000040899 | 16712 Ccr6          |
| ENSMUSG00000105838 | 16713 4930425O10Rik |
| ENSMUSG00000103260 | 16714 Gm8146        |

|                     |                    |
|---------------------|--------------------|
| ENSMUSG00000037034  | 16715 Pax1         |
| ENSMUSG00000008438  | 16716 Adam21       |
| ENSMUSG00000038496  | 16717 Slc19a3      |
| ENSMUSG000000055373 | 16718 Fut9         |
| ENSMUSG000000085055 | 16719 Gm15958      |
| ENSMUSG000000083527 | 16720 Gm12001      |
| ENSMUSG000000105180 | 16721 Gm4863       |
| ENSMUSG00000030093  | 16722 Wnt7a        |
| ENSMUSG00000043346  | 16723 Gm6741       |
| ENSMUSG000000084992 | 16724 Gm13842      |
| ENSMUSG000000025044 | 16725 Msr1         |
| ENSMUSG000000106331 | 16726 Gm5309       |
| ENSMUSG000000027360 | 16727 Hdc          |
| ENSMUSG000000086247 | 16728 Gm15787      |
| ENSMUSG000000023982 | 16729 Guca1a       |
| ENSMUSG000000088504 | 16730 Gm26490      |
| ENSMUSG000000055937 | 16731 Krt28        |
| ENSMUSG000000065706 | 16732 Gm22830      |
| ENSMUSG000000024397 | 16733 Aif1         |
| ENSMUSG000000026994 | 16734 Galnt3       |
| ENSMUSG000000090963 | 16735 Gm17655      |
| ENSMUSG000000034459 | 16736 Ifit1        |
| ENSMUSG000000038663 | 16737 Fsd2         |
| ENSMUSG000000105250 | 16738 Gm29736      |
| ENSMUSG000000045775 | 16739 Slc16a5      |
| ENSMUSG000000023411 | 16740 Nfatc4       |
| ENSMUSG000000108314 | 16741 RP23-73F23.5 |
| ENSMUSG000000091775 | 16742 Gm16494      |
| ENSMUSG000000002032 | 16743 Tmem25       |
| ENSMUSG000000029026 | 16744 Trp73        |
| ENSMUSG000000001260 | 16745 Gabrg1       |
| ENSMUSG000000082569 | 16746 Gm12634      |
| ENSMUSG000000036944 | 16747 Tmem71       |
| ENSMUSG000000019874 | 16748 Fabp7        |
| ENSMUSG000000029195 | 16749 Klb          |
| ENSMUSG000000048647 | 16750 Exd1         |
| ENSMUSG000000061988 | 16751 Rpl10a-ps2   |
| ENSMUSG000000091091 | 16752 Kcnmb3       |
| ENSMUSG000000056174 | 16753 Col8a2       |
| ENSMUSG000000003863 | 16754 Ppfia3       |
| ENSMUSG000000050211 | 16755 Pla2g4e      |
| ENSMUSG000000097679 | 16756 Rps19-ps5    |

|                    |                     |
|--------------------|---------------------|
| ENSMUSG00000101397 | 16757 Mug-ps1       |
| ENSMUSG00000081675 | 16758 Gm12712       |
| ENSMUSG00000092062 | 16759 Gm7664        |
| ENSMUSG00000042279 | 16760 H1foo         |
| ENSMUSG00000081757 | 16761 Gm13798       |
| ENSMUSG00000088583 | 16762 Gm22965       |
| ENSMUSG00000106817 | 16763 Gm43441       |
| ENSMUSG00000081680 | 16764 Gm14473       |
| ENSMUSG00000073007 | 16765 Fam46d        |
| ENSMUSG00000047143 | 16766 Dmrta2        |
| ENSMUSG00000035818 | 16767 Plekhs1       |
| ENSMUSG00000099658 | 16768 Gm28980       |
| ENSMUSG00000097831 | 16769 4930540M05Rik |
| ENSMUSG00000052160 | 16770 Pld4          |
| ENSMUSG00000102047 | 16771 2010010A06Rik |
| ENSMUSG00000002240 | 16772 Prr27         |
| ENSMUSG00000038112 | 16773 AW551984      |
| ENSMUSG00000102272 | 16774 Gm7512        |
| ENSMUSG00000083642 | 16775 Gm13148       |
| ENSMUSG00000034452 | 16776 Slc24a1       |
| ENSMUSG00000097407 | 16777 4933408J17Rik |
| ENSMUSG00000082171 | 16778 Rpl27-ps2     |
| ENSMUSG00000069265 | 16779 Hist1h3a      |
| ENSMUSG00000038498 | 16780 Catsper1      |
| ENSMUSG00000051124 | 16781 Gimap9        |
| ENSMUSG00000097248 | 16782 Gm2694        |
| ENSMUSG00000029151 | 16783 Slc30a3       |
| ENSMUSG00000086910 | 16784 Gm15755       |
| ENSMUSG00000074646 | 16785 6430550D23Rik |
| ENSMUSG00000024164 | 16786 C3            |
| ENSMUSG00000092389 | 16787 Gm20483       |
| ENSMUSG00000018459 | 16788 Slc13a3       |
| ENSMUSG00000035951 | 16789 Ascl3         |
| ENSMUSG00000102948 | 16790 Gm6101        |
| ENSMUSG00000103685 | 16791 Gm37074       |
| ENSMUSG00000031603 | 16792 Fgf20         |
| ENSMUSG00000106076 | 16793 Gm43840       |
| ENSMUSG00000063535 | 16794 Zfp773        |
| ENSMUSG00000085858 | 16795 Gm15831       |
| ENSMUSG00000027514 | 16796 Zbp1          |
| ENSMUSG00000035085 | 16797 1700020L24Rik |
| ENSMUSG00000044377 | 16798 Gm13080       |



|                    |                     |
|--------------------|---------------------|
| ENSMUSG00000097377 | 16799 Gm10822       |
| ENSMUSG00000067081 | 16800 Asb18         |
| ENSMUSG00000085981 | 16801 Gm11375       |
| ENSMUSG00000038775 | 16802 Vill          |
| ENSMUSG00000044156 | 16803 Hepacam2      |
| ENSMUSG00000070686 | 16804 C87414        |
| ENSMUSG00000058427 | 16805 Cxcl2         |
| ENSMUSG00000094615 | 16806 Gm4899        |
| ENSMUSG00000105045 | 16807 Rpl9-ps8      |
| ENSMUSG00000081845 | 16808 Prkaca-ps1    |
| ENSMUSG00000092186 | 16809 Gm5967        |
| ENSMUSG00000089748 | 16810 Matr3-ps2     |
| ENSMUSG00000108777 | 16811 RP24-172H24.1 |
| ENSMUSG00000034923 | 16812 Ly6g6f        |
| ENSMUSG00000097075 | 16813 D830044I16Rik |
| ENSMUSG00000007279 | 16814 Scube2        |
| ENSMUSG00000098030 | 16815 Gm6771        |
| ENSMUSG00000074874 | 16816 Ctla2b        |
| ENSMUSG00000086453 | 16817 Gm11457       |
| ENSMUSG00000080965 | 16818 Gm6461        |
| ENSMUSG00000035298 | 16819 Kihl35        |
| ENSMUSG00000083341 | 16820 Gm14238       |
| ENSMUSG00000100632 | 16821 9430060I03Rik |
| ENSMUSG00000070778 | 16822 Rpl7a-ps8     |
| ENSMUSG00000030707 | 16823 Coro1a        |
| ENSMUSG00000081689 | 16824 Gm9166        |
| ENSMUSG00000106797 | 16825 Gm42936       |
| ENSMUSG00000088248 | 16826 Mir1969       |
| ENSMUSG00000028801 | 16827 Stpg1         |
| ENSMUSG00000092029 | 16828 Gm9027        |
| ENSMUSG00000026831 | 16829 1700007K13Rik |
| ENSMUSG00000081456 | 16830 Gm7781        |
| ENSMUSG00000082208 | 16831 Gm15379       |
| ENSMUSG00000067889 | 16832 Sptbn2        |
| ENSMUSG00000106335 | 16833 Gm20223       |
| ENSMUSG00000082008 | 16834 Gm12390       |
| ENSMUSG00000055818 | 16835 A230083G16Rik |
| ENSMUSG00000042671 | 16836 Rgs8          |
| ENSMUSG00000103120 | 16837 Gm37392       |
| ENSMUSG00000097845 | 16838 A230020J21Rik |
| ENSMUSG00000053081 | 16839 1700069B07Rik |
| ENSMUSG00000055555 | 16840 4930502E18Rik |

|                    |                     |
|--------------------|---------------------|
| ENSMUSG00000059022 | 16841 Kcp           |
| ENSMUSG00000098058 | 16842 Gm8529        |
| ENSMUSG00000086969 | 16843 4930443O20Rik |
| ENSMUSG00000097566 | 16844 A930024N18Rik |
| ENSMUSG00000095407 | 16845 Tmem200c      |
| ENSMUSG00000073406 | 16846 H2-BI         |
| ENSMUSG00000097261 | 16847 4930532G15Rik |
| ENSMUSG00000054892 | 16848 Txk           |
| ENSMUSG00000029618 | 16849 Ocm           |
| ENSMUSG00000005465 | 16850 Il27ra        |
| ENSMUSG00000050503 | 16851 Fbxl22        |
| ENSMUSG00000035849 | 16852 Krt222        |
| ENSMUSG00000050978 | 16853 Gm5215        |
| ENSMUSG00000046610 | 16854 Oacyl         |
| ENSMUSG00000004961 | 16855 Syt5          |
| ENSMUSG00000032726 | 16856 Bmp8a         |
| ENSMUSG00000004187 | 16857 Kifc2         |
| ENSMUSG00000026380 | 16858 Tfcp2l1       |
| ENSMUSG00000084340 | 16859 Gm14766       |
| ENSMUSG00000104330 | 16860 Gm38285       |
| ENSMUSG00000080815 | 16861 Hmgb1-rs18    |
| ENSMUSG00000100967 | 16862 Gm29666       |
| ENSMUSG00000029561 | 16863 Oasl2         |
| ENSMUSG00000087611 | 16864 4930458D05Rik |
| ENSMUSG00000087620 | 16865 5330434G04Rik |
| ENSMUSG00000032796 | 16866 Lama1         |
| ENSMUSG00000105426 | 16867 Gm42618       |
| ENSMUSG00000036401 | 16868 Glt6d1        |
| ENSMUSG00000097380 | 16869 Gm26816       |
| ENSMUSG00000040035 | 16870 Disp2         |
| ENSMUSG00000101610 | 16871 Gm7560        |
| ENSMUSG00000031891 | 16872 Hsd11b2       |
| ENSMUSG00000030351 | 16873 Tspan11       |
| ENSMUSG00000101896 | 16874 Gm6244        |
| ENSMUSG00000082012 | 16875 Gm5257        |
| ENSMUSG00000098046 | 16876 Gm8254        |
| ENSMUSG00000089800 | 16877 Rps19-ps10    |
| ENSMUSG00000082424 | 16878 Gm13292       |
| ENSMUSG00000043017 | 16879 Ptgir         |
| ENSMUSG00000044664 | 16880 Prss42        |
| ENSMUSG00000022768 | 16881 Ccdc116       |
| ENSMUSG00000040891 | 16882 Foxa3         |

|                     |                     |
|---------------------|---------------------|
| ENSMUSG00000031842  | 16883 Pde4c         |
| ENSMUSG00000082111  | 16884 Gm12479       |
| ENSMUSG00000000093  | 16885 Tbx2          |
| ENSMUSG000000085615 | 16886 A330035P11Rik |
| ENSMUSG000000082862 | 16887 Gm13806       |
| ENSMUSG000000081906 | 16888 Rpl9-ps1      |
| ENSMUSG000000105914 | 16889 Gm19243       |
| ENSMUSG00000005681  | 16890 Apoa2         |
| ENSMUSG000000097093 | 16891 C330013E15Rik |
| ENSMUSG000000097888 | 16892 Gm26682       |
| ENSMUSG000000034239 | 16893 Gm884         |
| ENSMUSG000000099294 | 16894 Gm11214       |
| ENSMUSG000000050747 | 16895 Trim15        |
| ENSMUSG000000033024 | 16896 Klra9         |
| ENSMUSG000000005268 | 16897 Prlr          |
| ENSMUSG000000074715 | 16898 Ccl28         |
| ENSMUSG000000107981 | 16899 RP24-186O21.1 |
| ENSMUSG000000006269 | 16900 Atp6v1b1      |
| ENSMUSG000000031893 | 16901 Tsnaxip1      |
| ENSMUSG000000101308 | 16902 Gm28989       |
| ENSMUSG000000035799 | 16903 Twist1        |
| ENSMUSG000000099019 | 16904 Gm27254       |
| ENSMUSG000000029678 | 16905 Hyal5         |
| ENSMUSG000000036330 | 16906 Slc18a1       |
| ENSMUSG000000108663 | 16907 RP23-4H17.2   |
| ENSMUSG000000037542 | 16908 Aldh8a1       |
| ENSMUSG000000028584 | 16909 Lrrc38        |
| ENSMUSG000000003227 | 16910 Edar          |
| ENSMUSG000000066543 | 16911 Rpl17-ps9     |
| ENSMUSG000000084766 | 16912 Gm12714       |
| ENSMUSG000000047953 | 16913 Gp5           |
| ENSMUSG000000097985 | 16914 Gm5274        |
| ENSMUSG000000106454 | 16915 Gm17775       |
| ENSMUSG000000024842 | 16916 Cabp4         |
| ENSMUSG000000021741 | 16917 Gm5457        |
| ENSMUSG000000098002 | 16918 Gm9658        |
| ENSMUSG000000100568 | 16919 Gm29602       |
| ENSMUSG000000099056 | 16920 Gtpbp4-ps3    |
| ENSMUSG000000071040 | 16921 Gm9386        |
| ENSMUSG000000044177 | 16922 Wfikn2        |
| ENSMUSG000000031449 | 16923 Atp4b         |
| ENSMUSG000000085260 | 16924 Med9os        |

|                     |                     |
|---------------------|---------------------|
| ENSMUSG00000026395  | 16925 Ptprc         |
| ENSMUSG00000058174  | 16926 Gm5148        |
| ENSMUSG00000021057  | 16927 Akap5         |
| ENSMUSG00000028996  | 16928 Rbp7          |
| ENSMUSG00000050035  | 16929 Fhl4          |
| ENSMUSG00000081886  | 16930 Gm6175        |
| ENSMUSG000000102908 | 16931 Gm7558        |
| ENSMUSG00000025934  | 16932 Gsta3         |
| ENSMUSG000000108304 | 16933 RP23-421O10.3 |
| ENSMUSG00000078684  | 16934 5830417110Rik |
| ENSMUSG00000070577  | 16935 Gm572         |
| ENSMUSG00000086724  | 16936 Gm12833       |
| ENSMUSG00000090958  | 16937 Lrrc32        |
| ENSMUSG00000079227  | 16938 Ccr5          |
| ENSMUSG000000104385 | 16939 Gm7449        |
| ENSMUSG00000085718  | 16940 Rpl9-ps3      |
| ENSMUSG00000081505  | 16941 Gm8644        |
| ENSMUSG00000058794  | 16942 Nfe2          |
| ENSMUSG00000073598  | 16943 1700066B19Rik |
| ENSMUSG00000047281  | 16944 Sfn           |
| ENSMUSG00000059352  | 16945 Gm10064       |
| ENSMUSG000000106846 | 16946 Gm42786       |
| ENSMUSG00000060096  | 16947 Amd-ps3       |
| ENSMUSG00000087547  | 16948 Platr27       |
| ENSMUSG00000025243  | 16949 Slc6a20b      |
| ENSMUSG000000100303 | 16950 2600014E21Rik |
| ENSMUSG000000100512 | 16951 Ovol3         |
| ENSMUSG000000103369 | 16952 Gm6546        |
| ENSMUSG000000103408 | 16953 Gm37933       |
| ENSMUSG00000080860  | 16954 Gm13815       |
| ENSMUSG00000043388  | 16955 Tmem130       |
| ENSMUSG00000081244  | 16956 Gm13529       |
| ENSMUSG00000072460  | 16957 Atp5l-ps1     |
| ENSMUSG00000024207  | 16958 Acsbg2        |
| ENSMUSG00000037254  | 16959 Itih2         |
| ENSMUSG00000096810  | 16960 Gm10481       |
| ENSMUSG00000045608  | 16961 Dbx2          |
| ENSMUSG00000067297  | 16962 Ifit1bl2      |
| ENSMUSG00000084071  | 16963 Gm13378       |
| ENSMUSG00000084392  | 16964 Rps29-ps      |
| ENSMUSG00000032691  | 16965 Nlrp3         |
| ENSMUSG000000107501 | 16966 RP23-348F12.1 |

|                    |                     |
|--------------------|---------------------|
| ENSMUSG00000105636 | 16967 Gm43625       |
| ENSMUSG00000043719 | 16968 Col6a6        |
| ENSMUSG00000079671 | 16969 2610203C22Rik |
| ENSMUSG00000018620 | 16970 Mmp20         |
| ENSMUSG00000074516 | 16971 Gm10709       |
| ENSMUSG00000016028 | 16972 Celsr1        |
| ENSMUSG00000079242 | 16973 C730034F03Rik |
| ENSMUSG00000101209 | 16974 Gm8524        |
| ENSMUSG00000063953 | 16975 Amd2          |
| ENSMUSG00000062252 | 16976 Lhfpl5        |
| ENSMUSG00000060560 | 16977 Ces4a         |
| ENSMUSG00000038677 | 16978 Scube3        |
| ENSMUSG00000074647 | 16979 Fam83c        |
| ENSMUSG00000056821 | 16980 1700028I16Rik |
| ENSMUSG00000020953 | 16981 Coch          |
| ENSMUSG00000097701 | 16982 Gm17508       |
| ENSMUSG00000033590 | 16983 Myo5c         |
| ENSMUSG00000028088 | 16984 Fmo5          |
| ENSMUSG00000012428 | 16985 Steap4        |
| ENSMUSG00000083572 | 16986 Gm11849       |
| ENSMUSG00000039620 | 16987 6430573F11Rik |
| ENSMUSG00000033227 | 16988 Wnt6          |
| ENSMUSG00000086882 | 16989 Gm13352       |
| ENSMUSG00000103940 | 16990 Gm38227       |
| ENSMUSG00000026167 | 16991 Wnt10a        |
| ENSMUSG00000031162 | 16992 Gata1         |
| ENSMUSG00000082758 | 16993 Gm13024       |
| ENSMUSG00000097055 | 16994 Gm4419        |
| ENSMUSG00000042109 | 16995 Csd2          |
| ENSMUSG00000071273 | 16996 Gm5145        |
| ENSMUSG00000098136 | 16997 Gm8513        |
| ENSMUSG00000097027 | 16998 Gm26559       |
| ENSMUSG00000057596 | 16999 Trim30d       |
| ENSMUSG00000089700 | 17000 Gm2343        |
| ENSMUSG00000018470 | 17001 Kcnab3        |
| ENSMUSG00000056423 | 17002 Uts2b         |
| ENSMUSG00000096946 | 17003 Fmr1os        |
| ENSMUSG00000068617 | 17004 Efcab1        |
| ENSMUSG00000103224 | 17005 Gm2077        |
| ENSMUSG00000022501 | 17006 Prm1          |
| ENSMUSG00000106309 | 17007 Gm40414       |
| ENSMUSG00000030283 | 17008 St8sia1       |

|                     |                     |
|---------------------|---------------------|
| ENSMUSG00000105695  | 17009 Gm43327       |
| ENSMUSG00000082673  | 17010 Gm11857       |
| ENSMUSG00000030321  | 17011 Efcab12       |
| ENSMUSG000000081934 | 17012 Gm12193       |
| ENSMUSG00000100839  | 17013 Gm5920        |
| ENSMUSG00000068579  | 17014 Rpl7a-ps3     |
| ENSMUSG00000101049  | 17015 Gm8856        |
| ENSMUSG00000082382  | 17016 Gm14970       |
| ENSMUSG00000087110  | 17017 Gm11264       |
| ENSMUSG00000083546  | 17018 Tpt1-ps1      |
| ENSMUSG00000020017  | 17019 Hal           |
| ENSMUSG00000086799  | 17020 4930502E09Rik |
| ENSMUSG00000087255  | 17021 Gm6985        |
| ENSMUSG00000107686  | 17022 RP24-380D9.1  |
| ENSMUSG00000048334  | 17023 Gm8258        |
| ENSMUSG00000082964  | 17024 Rpl13-ps5     |
| ENSMUSG00000097013  | 17025 Gm26710       |
| ENSMUSG00000106565  | 17026 Gm43582       |
| ENSMUSG00000086114  | 17027 Gm14642       |
| ENSMUSG00000030935  | 17028 Acsm3         |
| ENSMUSG00000091844  | 17029 Gm8251        |
| ENSMUSG00000072941  | 17030 Sod3          |
| ENSMUSG00000081447  | 17031 Gm13870       |
| ENSMUSG00000054626  | 17032 Xlr           |
| ENSMUSG00000107721  | 17033 RP23-252F4.5  |
| ENSMUSG00000082175  | 17034 Gm14563       |
| ENSMUSG00000079265  | 17035 Gm8257        |
| ENSMUSG00000088144  | 17036 Gm24559       |
| ENSMUSG00000084072  | 17037 Gm11285       |
| ENSMUSG00000082419  | 17038 Gm11425       |
| ENSMUSG00000097885  | 17039 5031434O11Rik |
| ENSMUSG00000092176  | 17040 Gm20460       |
| ENSMUSG00000032131  | 17041 Abcg4         |
| ENSMUSG00000098066  | 17042 Gm26944       |
| ENSMUSG00000081994  | 17043 Gm14517       |
| ENSMUSG00000083685  | 17044 Gm12412       |
| ENSMUSG00000102447  | 17045 Gm6621        |
| ENSMUSG00000028024  | 17046 Enpep         |
| ENSMUSG00000100490  | 17047 Gm28455       |
| ENSMUSG00000083709  | 17048 Gm14688       |
| ENSMUSG00000064224  | 17049 Gsdma3        |
| ENSMUSG00000056849  | 17050 Gm16415       |

|                    |                     |
|--------------------|---------------------|
| ENSMUSG00000045952 | 17051 Gm5548        |
| ENSMUSG00000049130 | 17052 C5ar1         |
| ENSMUSG00000100065 | 17053 Gm18969       |
| ENSMUSG00000082280 | 17054 Gm5847        |
| ENSMUSG00000038011 | 17055 Dnah10        |
| ENSMUSG00000025498 | 17056 Irf7          |
| ENSMUSG00000084055 | 17057 Gm12004       |
| ENSMUSG00000020437 | 17058 Myo1g         |
| ENSMUSG00000084189 | 17059 Gm8089        |
| ENSMUSG00000014704 | 17060 Hoxa2         |
| ENSMUSG00000028359 | 17061 Orm3          |
| ENSMUSG00000107836 | 17062 RP23-87I4.1   |
| ENSMUSG00000053117 | 17063 E330013P04Rik |
| ENSMUSG00000100481 | 17064 Gm7114        |
| ENSMUSG00000039789 | 17065 Zfp597        |
| ENSMUSG00000043843 | 17066 Tmem145       |
| ENSMUSG00000047844 | 17067 Bex4          |
| ENSMUSG00000061992 | 17068 Gm4953        |
| ENSMUSG00000107772 | 17069 RP24-148O24.2 |
| ENSMUSG00000058430 | 17070 Rpl27a-ps2    |
| ENSMUSG00000097833 | 17071 Gm5976        |
| ENSMUSG00000032372 | 17072 Plscr2        |
| ENSMUSG00000016458 | 17073 Wt1           |
| ENSMUSG00000101726 | 17074 Gm7858        |
| ENSMUSG00000070641 | 17075 Gm16410       |
| ENSMUSG00000022548 | 17076 Apod          |
| ENSMUSG00000044647 | 17077 Csrnp3        |
| ENSMUSG00000086589 | 17078 Gm12915       |
| ENSMUSG00000002007 | 17079 Srpk3         |
| ENSMUSG00000023328 | 17080 Ache          |
| ENSMUSG00000033963 | 17081 Fancd2os      |
| ENSMUSG00000043448 | 17082 Gjc2          |
| ENSMUSG00000038932 | 17083 Tcfl5         |
| ENSMUSG00000103746 | 17084 1700001G17Rik |
| ENSMUSG00000071591 | 17085 Gm10339       |
| ENSMUSG00000105333 | 17086 mmu-mir-684-2 |
| ENSMUSG00000106036 | 17087 Gm43608       |
| ENSMUSG00000082032 | 17088 Gm12271       |
| ENSMUSG00000027612 | 17089 Mmp24         |
| ENSMUSG00000068680 | 17090 Gm10248       |
| ENSMUSG00000058281 | 17091 Gm10038       |
| ENSMUSG00000055567 | 17092 Unc80         |

|                    |                     |
|--------------------|---------------------|
| ENSMUSG00000044719 | 17093 E230025N22Rik |
| ENSMUSG00000042707 | 17094 Dnali1        |
| ENSMUSG00000038242 | 17095 Aox4          |
| ENSMUSG00000096400 | 17096 Gm6098        |
| ENSMUSG00000051596 | 17097 Otop1         |
| ENSMUSG00000038738 | 17098 Shank1        |
| ENSMUSG00000020583 | 17099 Matn3         |
| ENSMUSG00000009210 | 17100 Prr29         |
| ENSMUSG00000093989 | 17101 Rnasek        |
| ENSMUSG00000087226 | 17102 Gm14015       |
| ENSMUSG00000084177 | 17103 Gm13508       |
| ENSMUSG00000027073 | 17104 Prg2          |
| ENSMUSG00000015451 | 17105 C4a           |
| ENSMUSG00000104670 | 17106 Gm9369        |
| ENSMUSG00000082804 | 17107 Rpl17-ps1     |
| ENSMUSG00000081943 | 17108 Gm9078        |
| ENSMUSG00000073679 | 17109 Mxra8os       |
| ENSMUSG00000098016 | 17110 Gm9211        |
| ENSMUSG00000079710 | 17111 Gm3448        |
| ENSMUSG00000084219 | 17112 Gm14876       |
| ENSMUSG00000027776 | 17113 Il12a         |
| ENSMUSG00000027022 | 17114 Xirp2         |
| ENSMUSG00000030433 | 17115 Sbk2          |
| ENSMUSG00000015519 | 17116 2310057J18Rik |
| ENSMUSG00000055780 | 17117 Usp26         |
| ENSMUSG00000087020 | 17118 Gm16283       |
| ENSMUSG00000044548 | 17119 Dact1         |
| ENSMUSG00000081295 | 17120 Gm6275        |
| ENSMUSG00000052565 | 17121 Hist1h1d      |
| ENSMUSG00000027386 | 17122 Fbln7         |
| ENSMUSG00000054181 | 17123 A930012O16Rik |
| ENSMUSG00000086981 | 17124 Gm12171       |
| ENSMUSG00000068480 | 17125 Gm7551        |
| ENSMUSG00000040554 | 17126 Aipl1         |
| ENSMUSG00000083434 | 17127 Gm12760       |
| ENSMUSG00000027901 | 17128 Dennd2d       |
| ENSMUSG00000039329 | 17129 Tex19.1       |
| ENSMUSG00000031766 | 17130 Slc12a3       |
| ENSMUSG00000080254 | 17131 Fam220-ps     |
| ENSMUSG00000057074 | 17132 Ces1g         |
| ENSMUSG00000028270 | 17133 Gbp2          |
| ENSMUSG00000098169 | 17134 Gm5205        |



|                    |                     |
|--------------------|---------------------|
| ENSMUSG00000107541 | 17135 RP23-98N14.2  |
| ENSMUSG00000101937 | 17136 Gm5268        |
| ENSMUSG00000106806 | 17137 Gm17906       |
| ENSMUSG00000082689 | 17138 Gm14156       |
| ENSMUSG00000083537 | 17139 Gm14942       |
| ENSMUSG00000103183 | 17140 Gm37090       |
| ENSMUSG00000098042 | 17141 Gm5710        |
| ENSMUSG00000024353 | 17142 Mzb1          |
| ENSMUSG00000051998 | 17143 Lax1          |
| ENSMUSG00000076137 | 17144 Gm26384       |
| ENSMUSG00000098006 | 17145 Gm8565        |
| ENSMUSG00000097576 | 17146 D930030I03Rik |
| ENSMUSG00000067261 | 17147 Foxd3         |
| ENSMUSG00000100615 | 17148 Gm5511        |
| ENSMUSG00000105506 | 17149 Gm43743       |
| ENSMUSG00000103640 | 17150 Gm31406       |
| ENSMUSG00000081352 | 17151 Gm12389       |
| ENSMUSG00000040329 | 17152 Il7           |
| ENSMUSG00000026095 | 17153 Asnsd1        |
| ENSMUSG00000035509 | 17154 Fbxl21        |
| ENSMUSG00000090843 | 17155 Heatr4        |
| ENSMUSG00000083271 | 17156 Gm12384       |
| ENSMUSG00000097613 | 17157 Gm17597       |
| ENSMUSG00000105949 | 17158 Gm6510        |
| ENSMUSG00000102479 | 17159 Gm18551       |
| ENSMUSG00000104015 | 17160 Gm10745       |
| ENSMUSG00000029919 | 17161 Hpgds         |
| ENSMUSG00000105053 | 17162 Gm43064       |
| ENSMUSG00000050821 | 17163 Fam131a       |
| ENSMUSG00000029784 | 17164 Ssmem1        |
| ENSMUSG00000053181 | 17165 A830005F24Rik |
| ENSMUSG00000045053 | 17166 Kcng3         |
| ENSMUSG00000108392 | 17167 RP23-179K11.3 |
| ENSMUSG00000081390 | 17168 Gm14538       |
| ENSMUSG00000106551 | 17169 Gm1969        |
| ENSMUSG00000081179 | 17170 Gm13136       |
| ENSMUSG00000092301 | 17171 Gm6887        |
| ENSMUSG00000089581 | 17172 Gm23341       |
| ENSMUSG00000106225 | 17173 Gm43564       |
| ENSMUSG00000099517 | 17174 Hist1h3g      |
| ENSMUSG00000081100 | 17175 Gm14630       |
| ENSMUSG00000087424 | 17176 5730405O15Rik |

|                    |                     |
|--------------------|---------------------|
| ENSMUSG00000105875 | 17177 Gm43518       |
| ENSMUSG00000022101 | 17178 Fgf17         |
| ENSMUSG00000108033 | 17179 RP23-329D23.8 |
| ENSMUSG00000057143 | 17180 Trim12c       |
| ENSMUSG00000033910 | 17181 Gucy1a3       |
| ENSMUSG00000105542 | 17182 Gm34248       |
| ENSMUSG00000009070 | 17183 Rsph14        |
| ENSMUSG00000035539 | 17184 Ccdc180       |
| ENSMUSG00000070570 | 17185 Slc17a7       |
| ENSMUSG00000107359 | 17186 Gm43295       |
| ENSMUSG00000031028 | 17187 Tub           |
| ENSMUSG00000035041 | 17188 Creb3l3       |
| ENSMUSG00000062007 | 17189 Hsh2d         |
| ENSMUSG00000033597 | 17190 Caskin1       |
| ENSMUSG00000087277 | 17191 2010013B24Rik |
| ENSMUSG00000070564 | 17192 Ntn5          |
| ENSMUSG00000031394 | 17193 Opn1mw        |
| ENSMUSG00000029322 | 17194 Plac8         |
| ENSMUSG00000048012 | 17195 Zfp473        |
| ENSMUSG00000073234 | 17196 Gm8773        |
| ENSMUSG00000081494 | 17197 Gm14130       |
| ENSMUSG00000040866 | 17198 Rsph6a        |
| ENSMUSG00000081219 | 17199 Bambi-ps1     |
| ENSMUSG00000101888 | 17200 1700025H01Rik |
| ENSMUSG00000037686 | 17201 Aspg          |
| ENSMUSG00000097146 | 17202 Gm4211        |
| ENSMUSG00000082178 | 17203 Gm11307       |
| ENSMUSG00000068745 | 17204 Mybphl        |
| ENSMUSG00000053765 | 17205 Oas1f         |
| ENSMUSG00000085125 | 17206 Gm16070       |
| ENSMUSG00000017344 | 17207 Vtn           |
| ENSMUSG00000036892 | 17208 Prodh2        |
| ENSMUSG00000104965 | 17209 Gm43437       |
| ENSMUSG00000098019 | 17210 Gm2546        |
| ENSMUSG00000102545 | 17211 6430573P05Rik |
| ENSMUSG00000046854 | 17212 Pip5kl1       |
| ENSMUSG00000082026 | 17213 Gm5764        |
| ENSMUSG00000049281 | 17214 Scn3b         |
| ENSMUSG00000054409 | 17215 Tmem74        |
| ENSMUSG00000070576 | 17216 Mn1           |
| ENSMUSG00000079051 | 17217 Gm14025       |
| ENSMUSG00000019326 | 17218 Aoc3          |

|                    |                     |
|--------------------|---------------------|
| ENSMUSG00000098226 | 17219 Gm5272        |
| ENSMUSG00000083792 | 17220 Rpl12-ps2     |
| ENSMUSG00000045994 | 17221 B3gat1        |
| ENSMUSG00000098033 | 17222 Gm9381        |
| ENSMUSG00000051716 | 17223 Apon          |
| ENSMUSG00000104263 | 17224 9430062P05Rik |
| ENSMUSG00000032495 | 17225 Lrrc2         |
| ENSMUSG00000097761 | 17226 4930534D22Rik |
| ENSMUSG00000033726 | 17227 Emx1          |
| ENSMUSG00000103103 | 17228 4833445I07Rik |
| ENSMUSG00000079536 | 17229 Gm6880        |
| ENSMUSG00000032265 | 17230 Fam46a        |
| ENSMUSG00000082052 | 17231 Ywhaq-ps2     |
| ENSMUSG00000032690 | 17232 Oas2          |
| ENSMUSG00000106353 | 17233 Gm43726       |
| ENSMUSG00000085971 | 17234 Gm15411       |
| ENSMUSG00000090258 | 17235 Churc1        |
| ENSMUSG00000004610 | 17236 Etfb          |
| ENSMUSG00000082085 | 17237 Gm6441        |
| ENSMUSG00000078607 | 17238 1810010H24Rik |
| ENSMUSG00000030205 | 17239 Gprc5d        |
| ENSMUSG00000108356 | 17240 RP23-276L17.2 |
| ENSMUSG00000056797 | 17241 Gm4889        |
| ENSMUSG00000069385 | 17242 Gm10267       |
| ENSMUSG00000092428 | 17243 Gm20545       |
| ENSMUSG00000032028 | 17244 Nxpe2         |
| ENSMUSG00000022900 | 17245 lldr1         |
| ENSMUSG00000015843 | 17246 Rxrg          |
| ENSMUSG00000097129 | 17247 4930507D05Rik |
| ENSMUSG00000093152 | 17248 Gm25032       |
| ENSMUSG00000004263 | 17249 Atn1          |
| ENSMUSG00000087382 | 17250 Ctcflos       |
| ENSMUSG00000090051 | 17251 Gm8194        |
| ENSMUSG00000041287 | 17252 Sox15         |
| ENSMUSG00000045441 | 17253 Gprin3        |
| ENSMUSG00000036560 | 17254 Lgi4          |
| ENSMUSG00000101551 | 17255 Gm8870        |
| ENSMUSG00000060093 | 17256 Hist1h4a      |
| ENSMUSG00000041660 | 17257 Bbox1         |
| ENSMUSG00000029254 | 17258 Stap1         |
| ENSMUSG00000062064 | 17259 Slc2a7        |
| ENSMUSG00000050671 | 17260 Ism2          |

|                     |                     |
|---------------------|---------------------|
| ENSMUSG00000032098  | 17261 Treh          |
| ENSMUSG00000018263  | 17262 Tbx5          |
| ENSMUSG000000105294 | 17263 Gm43304       |
| ENSMUSG000000102663 | 17264 Gm6631        |
| ENSMUSG00000058550  | 17265 Dppa4         |
| ENSMUSG00000082235  | 17266 Gm13326       |
| ENSMUSG00000093847  | 17267 Gm5039        |
| ENSMUSG000000108308 | 17268 RP23-292C5.4  |
| ENSMUSG00000097134  | 17269 1110002J07Rik |
| ENSMUSG00000021263  | 17270 Degs2         |
| ENSMUSG00000071724  | 17271 Smpd5         |
| ENSMUSG000000102840 | 17272 Gm38037       |
| ENSMUSG00000070524  | 17273 Fcrlb         |
| ENSMUSG00000067063  | 17274 Gm6990        |
| ENSMUSG00000098199  | 17275 Gm9358        |
| ENSMUSG00000035383  | 17276 Pmch          |
| ENSMUSG00000081223  | 17277 Gm12247       |
| ENSMUSG00000040794  | 17278 C1qtnf4       |
| ENSMUSG00000039783  | 17279 Kmo           |
| ENSMUSG00000018999  | 17280 Slc35b4       |
| ENSMUSG00000044317  | 17281 Gpr4          |
| ENSMUSG000000102740 | 17282 Gm37599       |
| ENSMUSG00000022613  | 17283 Miox          |
| ENSMUSG00000018566  | 17284 Slc2a4        |
| ENSMUSG00000002190  | 17285 Clgn          |
| ENSMUSG000000106015 | 17286 Gm42980       |
| ENSMUSG00000027403  | 17287 Tgm6          |
| ENSMUSG00000081841  | 17288 Gm13444       |
| ENSMUSG00000086539  | 17289 Gm16759       |
| ENSMUSG00000094374  | 17290 Gm5435        |
| ENSMUSG000000103564 | 17291 Gm35067       |
| ENSMUSG00000060314  | 17292 Zfp941        |
| ENSMUSG00000037159  | 17293 Wee2          |
| ENSMUSG00000034107  | 17294 Ano7          |
| ENSMUSG00000098175  | 17295 Gm7545        |
| ENSMUSG00000083553  | 17296 Gm11989       |
| ENSMUSG00000015890  | 17297 Amdhd1        |
| ENSMUSG00000041886  | 17298 Macc1         |
| ENSMUSG00000018914  | 17299 Il3           |
| ENSMUSG00000002228  | 17300 Ppm1j         |
| ENSMUSG00000068117  | 17301 Mei1          |
| ENSMUSG00000058745  | 17302 Gm9174        |

|                    |                     |
|--------------------|---------------------|
| ENSMUSG00000086176 | 17303 Gm15534       |
| ENSMUSG00000107169 | 17304 Gm43796       |
| ENSMUSG00000021587 | 17305 Pcsk1         |
| ENSMUSG00000037578 | 17306 Pkd2l1        |
| ENSMUSG00000087633 | 17307 Gm14455       |
| ENSMUSG00000000248 | 17308 Clec2g        |
| ENSMUSG00000083888 | 17309 Gm12441       |
| ENSMUSG00000065200 | 17310 Gm24613       |
| ENSMUSG00000069171 | 17311 Nr2f1         |
| ENSMUSG00000066060 | 17312 Gm12866       |
| ENSMUSG00000106586 | 17313 1700013M08Rik |
| ENSMUSG00000096919 | 17314 Gm26775       |
| ENSMUSG00000102546 | 17315 Gm9722        |
| ENSMUSG00000053040 | 17316 Aph1c         |
| ENSMUSG00000051225 | 17317 Fam83a        |
| ENSMUSG00000034177 | 17318 Rnf43         |
| ENSMUSG00000104605 | 17319 Gm42922       |
| ENSMUSG00000055102 | 17320 Zfp819        |
| ENSMUSG00000097891 | 17321 Gm3650        |
| ENSMUSG00000099094 | 17322 Gm19569       |
| ENSMUSG00000101240 | 17323 Gm28266       |
| ENSMUSG00000085680 | 17324 Gm13327       |
| ENSMUSG00000040907 | 17325 Atp1a3        |
| ENSMUSG00000081323 | 17326 Rpl7l1-ps1    |
| ENSMUSG00000081852 | 17327 Gm12281       |
| ENSMUSG00000034918 | 17328 Cdhr2         |
| ENSMUSG00000045709 | 17329 Smkr-ps       |
| ENSMUSG00000100744 | 17330 Gm17764       |
| ENSMUSG00000001444 | 17331 Tbx21         |
| ENSMUSG00000085196 | 17332 Gm14963       |
| ENSMUSG00000064308 | 17333 2410137M14Rik |
| ENSMUSG00000098065 | 17334 Gm5177        |
| ENSMUSG00000021032 | 17335 Ngb           |
| ENSMUSG00000084238 | 17336 Gm13076       |
| ENSMUSG00000020926 | 17337 Adam11        |
| ENSMUSG00000097000 | 17338 Gm17435       |
| ENSMUSG00000085077 | 17339 1700049E15Rik |
| ENSMUSG00000104204 | 17340 Gm37397       |
| ENSMUSG00000046388 | 17341 Gm9806        |
| ENSMUSG00000030428 | 17342 Ttyh1         |
| ENSMUSG00000105834 | 17343 Gm43159       |
| ENSMUSG00000070368 | 17344 Prok1         |

|                     |                     |
|---------------------|---------------------|
| ENSMUSG00000084313  | 17345 Gm13809       |
| ENSMUSG00000047992  | 17346 Fam69c        |
| ENSMUSG00000106258  | 17347 Rpl7a-ps7     |
| ENSMUSG00000008845  | 17348 Cd163         |
| ENSMUSG00000024338  | 17349 Psmb8         |
| ENSMUSG00000098037  | 17350 Gm7765        |
| ENSMUSG00000021944  | 17351 Gata4         |
| ENSMUSG00000055629  | 17352 B4galnt4      |
| ENSMUSG00000000216  | 17353 Scnn1g        |
| ENSMUSG000000048592 | 17354 Gm5946        |
| ENSMUSG00000082198  | 17355 Gm14504       |
| ENSMUSG00000035745  | 17356 Grin3b        |
| ENSMUSG000000086621 | 17357 Gm13348       |
| ENSMUSG00000005338  | 17358 Cadm3         |
| ENSMUSG000000081670 | 17359 Gm15697       |
| ENSMUSG000000063428 | 17360 Ddo           |
| ENSMUSG000000080758 | 17361 Gm5392        |
| ENSMUSG00000053574  | 17362 4930563E22Rik |
| ENSMUSG000000083440 | 17363 Rpl7a-ps12    |
| ENSMUSG000000097981 | 17364 Gm7583        |
| ENSMUSG000000097966 | 17365 Gm9423        |
| ENSMUSG000000091709 | 17366 Gm17189       |
| ENSMUSG00000052396  | 17367 Mogat2        |
| ENSMUSG00000079460  | 17368 4933403O08Rik |
| ENSMUSG000000108073 | 17369 RP23-253C24.8 |
| ENSMUSG000000086789 | 17370 Lym7os        |
| ENSMUSG000000099825 | 17371 1810012K16Rik |
| ENSMUSG000000103957 | 17372 Gm10766       |
| ENSMUSG000000102336 | 17373 Gm37233       |
| ENSMUSG000000031070 | 17374 Mrgprf        |
| ENSMUSG000000103903 | 17375 Rps2-ps2      |
| ENSMUSG000000087443 | 17376 Ppp1r18os     |
| ENSMUSG000000031382 | 17377 Asb11         |
| ENSMUSG000000081423 | 17378 Gm12882       |
| ENSMUSG000000082608 | 17379 Gm7670        |
| ENSMUSG000000021359 | 17380 Tfp2a         |
| ENSMUSG000000021364 | 17381 Elovl2        |
| ENSMUSG000000085798 | 17382 Gm2018        |
| ENSMUSG000000062391 | 17383 4932435O22Rik |
| ENSMUSG000000082258 | 17384 Gm15289       |
| ENSMUSG000000044576 | 17385 Gareml        |
| ENSMUSG000000046005 | 17386 D830044D21Rik |

|                     |                     |
|---------------------|---------------------|
| ENSMUSG00000039110  | 17387 Mycbpap       |
| ENSMUSG00000043441  | 17388 Gpr149        |
| ENSMUSG00000098052  | 17389 Gm5300        |
| ENSMUSG00000071193  | 17390 Gm4938        |
| ENSMUSG00000072572  | 17391 Slc39a2       |
| ENSMUSG00000032852  | 17392 Rspo4         |
| ENSMUSG00000039533  | 17393 Mmd2          |
| ENSMUSG00000044528  | 17394 Tram1l1       |
| ENSMUSG00000021260  | 17395 Hhip1         |
| ENSMUSG000000106313 | 17396 Gm9402        |
| ENSMUSG00000051652  | 17397 Lrrc3         |
| ENSMUSG00000097479  | 17398 Gm26582       |
| ENSMUSG00000048916  | 17399 Gm5540        |
| ENSMUSG00000062874  | 17400 Gm4978        |
| ENSMUSG00000031980  | 17401 Agt           |
| ENSMUSG00000039313  | 17402 AF529169      |
| ENSMUSG00000022540  | 17403 Rogdi         |
| ENSMUSG000000104731 | 17404 Gm43249       |
| ENSMUSG00000096299  | 17405 Gm21814       |
| ENSMUSG000000108204 | 17406 RP23-5D6.7    |
| ENSMUSG00000071207  | 17407 Gm8587        |
| ENSMUSG00000097889  | 17408 Gm26541       |
| ENSMUSG00000057400  | 17409 Ces1c         |
| ENSMUSG00000022496  | 17410 Tnfrsf17      |
| ENSMUSG00000097820  | 17411 E530011L22Rik |
| ENSMUSG00000094683  | 17412 Ap3m1-ps      |
| ENSMUSG00000087252  | 17413 Gm14379       |
| ENSMUSG00000086670  | 17414 Gm13194       |
| ENSMUSG00000062432  | 17415 Cyp26c1       |
| ENSMUSG00000058491  | 17416 Olfr869       |
| ENSMUSG00000068397  | 17417 Gm10240       |
| ENSMUSG000000108079 | 17418 RP23-4F16.6   |
| ENSMUSG00000040026  | 17419 Saa3          |
| ENSMUSG00000022218  | 17420 Tgm1          |
| ENSMUSG00000020793  | 17421 Galr2         |
| ENSMUSG00000097934  | 17422 6720483E21Rik |
| ENSMUSG00000052302  | 17423 Tbc1d30       |
| ENSMUSG00000035355  | 17424 Kcnh4         |
| ENSMUSG00000090897  | 17425 Esp6Esp5      |
| ENSMUSG00000097951  | 17426 Gm7611        |
| ENSMUSG00000091572  | 17427 Vmn2r3        |
| ENSMUSG0000004473   | 17428 Clec11a       |

|                    |                    |
|--------------------|--------------------|
| ENSMUSG00000091155 | 17429 Serpine3     |
| ENSMUSG00000103908 | 17430 Gm37502      |
| ENSMUSG00000044258 | 17431 Ctla2a       |
| ENSMUSG00000095440 | 17432 Figl2        |
| ENSMUSG00000103280 | 17433 Gm37277      |
| ENSMUSG00000097397 | 17434 Gm16861      |
| ENSMUSG00000028268 | 17435 Gbp3         |
| ENSMUSG00000060678 | 17436 Hist1h4c     |
| ENSMUSG00000026770 | 17437 Il2ra        |
| ENSMUSG00000053388 | 17438 Trim50       |
| ENSMUSG00000078586 | 17439 Gm11735      |
| ENSMUSG00000045009 | 17440 Prrt3        |
| ENSMUSG00000046908 | 17441 Ltb4r1       |
| ENSMUSG00000106680 | 17442 Gm43852      |
| ENSMUSG00000097286 | 17443 Gm26684      |
| ENSMUSG00000050641 | 17444 BC048562     |
| ENSMUSG00000059406 | 17445 Tmprss9      |
| ENSMUSG00000026890 | 17446 Lhx6         |
| ENSMUSG00000073682 | 17447 Gm10563      |
| ENSMUSG00000073012 | 17448 Fnd3c2       |
| ENSMUSG00000027636 | 17449 Sla2         |
| ENSMUSG00000051735 | 17450 Rinl         |
| ENSMUSG00000092438 | 17451 Gm18734      |
| ENSMUSG00000083372 | 17452 Gm11235      |
| ENSMUSG00000047220 | 17453 Ccdc36       |
| ENSMUSG00000009654 | 17454 Oit3         |
| ENSMUSG00000027376 | 17455 Prom2        |
| ENSMUSG00000095150 | 17456 Rps19-ps13   |
| ENSMUSG00000023968 | 17457 Crip3        |
| ENSMUSG00000108513 | 17458 RP24-136L4.6 |
| ENSMUSG00000086096 | 17459 Gm12688      |
| ENSMUSG00000103674 | 17460 Gm37699      |
| ENSMUSG00000052131 | 17461 Akr1b7       |
| ENSMUSG00000085012 | 17462 Gm15492      |
| ENSMUSG00000064288 | 17463 Hist1h4k     |
| ENSMUSG00000066315 | 17464 Gm12918      |
| ENSMUSG00000081632 | 17465 Gm11443      |
| ENSMUSG00000026480 | 17466 Ncf2         |
| ENSMUSG00000021565 | 17467 Slc6a19      |
| ENSMUSG00000026829 | 17468 Gbgt1        |
| ENSMUSG00000054746 | 17469 Abca15       |
| ENSMUSG00000047654 | 17470 Tssk6        |



|                    |                     |
|--------------------|---------------------|
| ENSMUSG00000103729 | 17471 Gm37098       |
| ENSMUSG00000029231 | 17472 Pdgfra        |
| ENSMUSG00000033268 | 17473 Duox1         |
| ENSMUSG00000022416 | 17474 Cacna1i       |
| ENSMUSG00000024986 | 17475 Hhex          |
| ENSMUSG00000082031 | 17476 Gm8097        |
| ENSMUSG00000078177 | 17477 Gm4877        |
| ENSMUSG00000082336 | 17478 Gm8401        |
| ENSMUSG00000024402 | 17479 Lta           |
| ENSMUSG00000030737 | 17480 Slco2b1       |
| ENSMUSG00000028332 | 17481 Hemgn         |
| ENSMUSG00000084125 | 17482 Gm8757        |
| ENSMUSG00000037977 | 17483 6430571L13Rik |
| ENSMUSG00000084221 | 17484 Hmgb1-ps4     |
| ENSMUSG00000081563 | 17485 Gm12635       |
| ENSMUSG00000086047 | 17486 9530046B11Rik |
| ENSMUSG00000107698 | 17487 RP23-49L8.4   |
| ENSMUSG00000102152 | 17488 Gm37475       |
| ENSMUSG00000035594 | 17489 Chrna5        |
| ENSMUSG00000097366 | 17490 Gm8177        |
| ENSMUSG00000056682 | 17491 4930465K10Rik |
| ENSMUSG00000031518 | 17492 Spata4        |
| ENSMUSG00000103292 | 17493 Gm35048       |
| ENSMUSG00000098421 | 17494 Gm27190       |
| ENSMUSG00000108539 | 17495 Klk1b12-ps    |
| ENSMUSG00000097251 | 17496 5033417F24Rik |
| ENSMUSG00000103993 | 17497 Gm38030       |
| ENSMUSG00000021200 | 17498 Asb2          |
| ENSMUSG00000092335 | 17499 Gm7221        |
| ENSMUSG00000050700 | 17500 Emilin3       |
| ENSMUSG00000081176 | 17501 H3f3a-ps2     |
| ENSMUSG00000072387 | 17502 Gm10356       |
| ENSMUSG00000044006 | 17503 Cilp2         |
| ENSMUSG00000099009 | 17504 Gm28046       |
| ENSMUSG00000108257 | 17505 RP23-336I5.10 |
| ENSMUSG00000083807 | 17506 Gm13466       |
| ENSMUSG00000039728 | 17507 Slc6a5        |
| ENSMUSG00000071234 | 17508 Syndig1l      |
| ENSMUSG00000089687 | 17509 Rab42         |
| ENSMUSG00000035165 | 17510 Kcne3         |
| ENSMUSG00000098177 | 17511 Gm4823        |
| ENSMUSG00000076439 | 17512 Mog           |

|                    |                     |
|--------------------|---------------------|
| ENSMUSG00000083355 | 17513 Gm11581       |
| ENSMUSG00000021298 | 17514 Gpr132        |
| ENSMUSG00000078234 | 17515 Klhdc7a       |
| ENSMUSG00000093862 | 17516 Gm5117        |
| ENSMUSG00000108761 | 17517 Atp6v0c-ps1   |
| ENSMUSG00000095987 | 17518 Gm13104       |
| ENSMUSG00000095940 | 17519 Gm16416       |
| ENSMUSG00000106759 | 17520 RP24-211L21.1 |
| ENSMUSG00000033029 | 17521 1700088E04Rik |
| ENSMUSG00000097259 | 17522 Gm26766       |
| ENSMUSG00000051669 | 17523 AU021092      |
| ENSMUSG00000035349 | 17524 Mia2          |
| ENSMUSG00000097666 | 17525 A330094K24Rik |
| ENSMUSG00000048899 | 17526 Rimkla        |
| ENSMUSG00000039838 | 17527 Slc45a1       |
| ENSMUSG00000038811 | 17528 Gngt2         |
| ENSMUSG00000081304 | 17529 Gm11509       |
| ENSMUSG00000105419 | 17530 Gm43205       |
| ENSMUSG00000027296 | 17531 Itpka         |
| ENSMUSG00000085272 | 17532 Sbk3          |
| ENSMUSG00000016024 | 17533 Lbp           |
| ENSMUSG00000042190 | 17534 Cmklr1        |
| ENSMUSG00000081282 | 17535 Gm13836       |
| ENSMUSG00000004360 | 17536 9330159F19Rik |
| ENSMUSG00000106358 | 17537 Gm7047        |
| ENSMUSG00000079554 | 17538 Aox2          |
| ENSMUSG00000049173 | 17539 Myoz3         |
| ENSMUSG00000108626 | 17540 RP23-178C20.4 |
| ENSMUSG00000104117 | 17541 Gm20743       |
| ENSMUSG00000097817 | 17542 Gm26810       |
| ENSMUSG00000084208 | 17543 Gm12792       |
| ENSMUSG00000020601 | 17544 Trib2         |
| ENSMUSG00000096349 | 17545 Gm22513       |
| ENSMUSG00000092577 | 17546 Gm7393        |
| ENSMUSG00000103114 | 17547 Gm32200       |
| ENSMUSG00000042251 | 17548 Pm20d1        |
| ENSMUSG00000105892 | 17549 Gm35013       |
| ENSMUSG00000102090 | 17550 Gm8964        |
| ENSMUSG00000083438 | 17551 Gm5402        |
| ENSMUSG00000082250 | 17552 Gm12181       |
| ENSMUSG00000021680 | 17553 Crhbp         |
| ENSMUSG00000083238 | 17554 Hspe1-ps4     |

|                    |                     |
|--------------------|---------------------|
| ENSMUSG00000025478 | 17555 Dpysl4        |
| ENSMUSG00000084855 | 17556 Gm9850        |
| ENSMUSG00000096146 | 17557 Kcnj11        |
| ENSMUSG00000022759 | 17558 Lrrc74b       |
| ENSMUSG00000032128 | 17559 Robo3         |
| ENSMUSG00000107212 | 17560 Gm5302        |
| ENSMUSG00000090468 | 17561 Gm2840        |
| ENSMUSG00000023903 | 17562 Mmp25         |
| ENSMUSG00000082665 | 17563 Gm11470       |
| ENSMUSG00000090406 | 17564 Gm17058       |
| ENSMUSG00000104324 | 17565 Gm37320       |
| ENSMUSG00000098081 | 17566 Gm26913       |
| ENSMUSG00000081601 | 17567 Gm13065       |
| ENSMUSG00000059481 | 17568 Plg           |
| ENSMUSG00000031780 | 17569 Ccl17         |
| ENSMUSG00000093954 | 17570 Gm16867       |
| ENSMUSG00000048484 | 17571 Gm7461        |
| ENSMUSG00000021091 | 17572 Serpina3n     |
| ENSMUSG00000087775 | 17573 Rprl2         |
| ENSMUSG00000028747 | 17574 Htr6          |
| ENSMUSG00000021986 | 17575 Amer2         |
| ENSMUSG00000039296 | 17576 Spdye4a       |
| ENSMUSG00000039720 | 17577 Got1l1        |
| ENSMUSG00000086514 | 17578 Gm11747       |
| ENSMUSG00000053863 | 17579 Mepe          |
| ENSMUSG00000060550 | 17580 H2-Q7         |
| ENSMUSG00000000320 | 17581 Alox12        |
| ENSMUSG00000024519 | 17582 Cplx4         |
| ENSMUSG00000029436 | 17583 Mmp17         |
| ENSMUSG00000081620 | 17584 Gm14633       |
| ENSMUSG00000022469 | 17585 Rapgef3       |
| ENSMUSG00000025189 | 17586 Cnnm1         |
| ENSMUSG00000047419 | 17587 Cmya5         |
| ENSMUSG00000036198 | 17588 Arhgap36      |
| ENSMUSG00000034362 | 17589 Csta1         |
| ENSMUSG00000083077 | 17590 Gm14126       |
| ENSMUSG00000085957 | 17591 Syna          |
| ENSMUSG00000101097 | 17592 Gm6679        |
| ENSMUSG00000080742 | 17593 Gm14035       |
| ENSMUSG00000107618 | 17594 RP24-469M15.1 |
| ENSMUSG00000020838 | 17595 Slc6a4        |
| ENSMUSG00000078653 | 17596 Cntd1         |

|                    |                     |
|--------------------|---------------------|
| ENSMUSG00000030406 | 17597 Gipr          |
| ENSMUSG00000000579 | 17598 Dynlt1c       |
| ENSMUSG00000031388 | 17599 Naa10         |
| ENSMUSG00000028445 | 17600 Enho          |
| ENSMUSG00000021123 | 17601 Rdh12         |
| ENSMUSG00000071656 | 17602 Lrrn4cl       |
| ENSMUSG00000030830 | 17603 Itgal         |
| ENSMUSG00000001348 | 17604 Acp5          |
| ENSMUSG00000085376 | 17605 Gm14508       |
| ENSMUSG00000049265 | 17606 Kcnk3         |
| ENSMUSG00000080869 | 17607 Gm11856       |
| ENSMUSG00000023926 | 17608 Rhag          |
| ENSMUSG00000025527 | 17609 Satl1         |
| ENSMUSG00000053773 | 17610 Rdh8          |
| ENSMUSG00000083319 | 17611 Gm11284       |
| ENSMUSG00000025202 | 17612 Scd3          |
| ENSMUSG00000059891 | 17613 Tsk3          |
| ENSMUSG00000083662 | 17614 Gm12152       |
| ENSMUSG00000046719 | 17615 Nxph3         |
| ENSMUSG00000100652 | 17616 Gm7634        |
| ENSMUSG00000036856 | 17617 Wnt4          |
| ENSMUSG00000024621 | 17618 Csf1r         |
| ENSMUSG00000103857 | 17619 Gm37249       |
| ENSMUSG00000080938 | 17620 Gm6062        |
| ENSMUSG00000020866 | 17621 Cacna1g       |
| ENSMUSG00000094443 | 17622 Sgol2b        |
| ENSMUSG00000029437 | 17623 Il31          |
| ENSMUSG00000081917 | 17624 Gm15209       |
| ENSMUSG00000021903 | 17625 Galnt15       |
| ENSMUSG00000066196 | 17626 Spag8         |
| ENSMUSG00000105237 | 17627 Gm42580       |
| ENSMUSG00000068860 | 17628 Gm128         |
| ENSMUSG00000083693 | 17629 Gm11971       |
| ENSMUSG00000101171 | 17630 Gm7593        |
| ENSMUSG00000087003 | 17631 Cntrobos      |
| ENSMUSG00000105504 | 17632 Gbp5          |
| ENSMUSG00000010505 | 17633 Myt1          |
| ENSMUSG00000060808 | 17634 B9d1os        |
| ENSMUSG00000028699 | 17635 Tspan1        |
| ENSMUSG00000045842 | 17636 Tgif2-ps2     |
| ENSMUSG00000050114 | 17637 Prdx6b        |
| ENSMUSG00000099338 | 17638 2810030D12Rik |

|                     |       |               |
|---------------------|-------|---------------|
| ENSMUSG00000034219  | 17639 | 14-Sep        |
| ENSMUSG00000031147  | 17640 | Magix         |
| ENSMUSG00000031849  | 17641 | Comp          |
| ENSMUSG00000033633  | 17642 | Clec18a       |
| ENSMUSG00000040253  | 17643 | Gbp7          |
| ENSMUSG00000022949  | 17644 | Clic6         |
| ENSMUSG000000107526 | 17645 | RP24-328H10.1 |
| ENSMUSG00000096973  | 17646 | Gm5974        |
| ENSMUSG00000041556  | 17647 | Fbxo2         |
| ENSMUSG00000069814  | 17648 | E130309D14Rik |
| ENSMUSG00000083971  | 17649 | Gm5943        |
| ENSMUSG00000029556  | 17650 | Hnf1a         |
| ENSMUSG000000104918 | 17651 | Gm42944       |
| ENSMUSG00000081317  | 17652 | Gm12757       |
| ENSMUSG00000097943  | 17653 | Gm7833        |
| ENSMUSG000000103823 | 17654 | Gm7899        |
| ENSMUSG00000058488  | 17655 | Kl            |
| ENSMUSG00000092518  | 17656 | Fam71e2       |
| ENSMUSG00000038725  | 17657 | Pkhd1l1       |
| ENSMUSG00000027339  | 17658 | Rassf2        |
| ENSMUSG000000103021 | 17659 | Gm37682       |
| ENSMUSG00000081207  | 17660 | Gm13775       |
| ENSMUSG00000024224  | 17661 | Clpsl2        |
| ENSMUSG00000054679  | 17662 | Srsf12        |
| ENSMUSG00000079465  | 17663 | Col4a3        |
| ENSMUSG00000073485  | 17664 | H3f3aos       |
| ENSMUSG00000099692  | 17665 | Gm5696        |
| ENSMUSG00000083740  | 17666 | Gm11456       |
| ENSMUSG00000079259  | 17667 | Trim71        |
| ENSMUSG00000085600  | 17668 | E330012B07Rik |
| ENSMUSG00000083887  | 17669 | Gm11930       |
| ENSMUSG000000105111 | 17670 | Gm43310       |
| ENSMUSG000000105396 | 17671 | Gm6057        |
| ENSMUSG00000023484  | 17672 | Prph          |
| ENSMUSG000000104089 | 17673 | Gm38274       |
| ENSMUSG00000003476  | 17674 | Crhr2         |
| ENSMUSG000000034917 | 17675 | Tjp3          |
| ENSMUSG00000038527  | 17676 | C1rl          |
| ENSMUSG00000045391  | 17677 | 1700120B22Rik |
| ENSMUSG00000074570  | 17678 | Cass4         |
| ENSMUSG000000102818 | 17679 | Gm37796       |
| ENSMUSG00000071540  | 17680 | 3425401B19Rik |

|                    |                     |
|--------------------|---------------------|
| ENSMUSG00000000244 | 17681 Tspan32       |
| ENSMUSG00000108435 | 17682 RP23-60P18.10 |
| ENSMUSG00000105366 | 17683 Gm43719       |
| ENSMUSG00000097391 | 17684 Mirg          |
| ENSMUSG00000042351 | 17685 Grap2         |
| ENSMUSG00000097720 | 17686 Gm26849       |
| ENSMUSG00000107037 | 17687 Gm29793       |
| ENSMUSG00000006488 | 17688 Prl7a1        |
| ENSMUSG00000107443 | 17689 RP24-392D22.2 |
| ENSMUSG00000075390 | 17690 Rpl36-ps8     |
| ENSMUSG00000029601 | 17691 lqcd          |
| ENSMUSG00000075463 | 17692 4930594M22Rik |
| ENSMUSG00000057948 | 17693 Unc13d        |
| ENSMUSG00000092167 | 17694 Gm3696        |
| ENSMUSG00000034579 | 17695 Pla2g3        |
| ENSMUSG00000081235 | 17696 Gm14788       |
| ENSMUSG00000103568 | 17697 Gm29741       |
| ENSMUSG00000082307 | 17698 Gm13418       |
| ENSMUSG00000108520 | 17699 RP23-311C19.5 |
| ENSMUSG00000097937 | 17700 Gm6967        |
| ENSMUSG00000093533 | 17701 Vmn2r-ps119   |
| ENSMUSG00000006411 | 17702 Pvrl4         |
| ENSMUSG00000089803 | 17703 Gm10171       |
| ENSMUSG00000087230 | 17704 Mroh3         |
| ENSMUSG00000094417 | 17705 Gm13243       |
| ENSMUSG00000101385 | 17706 Gm5261        |
| ENSMUSG00000064036 | 17707 Mro           |
| ENSMUSG00000015405 | 17708 Ace2          |
| ENSMUSG00000073409 | 17709 H2-Q6         |
| ENSMUSG00000106019 | 17710 Gm43672       |
| ENSMUSG00000042763 | 17711 Maneal        |
| ENSMUSG00000074887 | 17712 EU599041      |
| ENSMUSG00000083534 | 17713 H2-M6-ps      |
| ENSMUSG00000092284 | 17714 Gm8801        |
| ENSMUSG00000030543 | 17715 Mesp2         |
| ENSMUSG00000092241 | 17716 Gm20522       |
| ENSMUSG00000096764 | 17717 Gm21985       |
| ENSMUSG00000035208 | 17718 Slfn8         |
| ENSMUSG00000036098 | 17719 Myrf          |
| ENSMUSG00000062518 | 17720 Zfp534        |
| ENSMUSG00000048938 | 17721 Nr1h5         |
| ENSMUSG00000097473 | 17722 Gm26585       |

|                     |                     |
|---------------------|---------------------|
| ENSMUSG00000101156  | 17723 Gm29114       |
| ENSMUSG00000108686  | 17724 RP23-49I18.4  |
| ENSMUSG00000107849  | 17725 RP23-4F16.8   |
| ENSMUSG00000082950  | 17726 Gm7834        |
| ENSMUSG00000107430  | 17727 Pp2d1-ps      |
| ENSMUSG00000059585  | 17728 Ube2nl        |
| ENSMUSG00000026616  | 17729 Cr2           |
| ENSMUSG00000067321  | 17730 Gm7931        |
| ENSMUSG00000097495  | 17731 Gm26651       |
| ENSMUSG00000034818  | 17732 Celf5         |
| ENSMUSG00000066620  | 17733 Gm4883        |
| ENSMUSG00000096962  | 17734 Gm26622       |
| ENSMUSG00000086216  | 17735 Gm13610       |
| ENSMUSG00000040728  | 17736 Esrp1         |
| ENSMUSG00000037202  | 17737 Prf1          |
| ENSMUSG00000097692  | 17738 A230060F14Rik |
| ENSMUSG00000055733  | 17739 Nap1l3        |
| ENSMUSG00000073888  | 17740 Ccl27a        |
| ENSMUSG00000052921  | 17741 Arhgef15      |
| ENSMUSG00000097715  | 17742 Gpr137b-ps    |
| ENSMUSG00000026321  | 17743 Tnfrsf11a     |
| ENSMUSG00000100041  | 17744 Gm5702        |
| ENSMUSG00000005364  | 17745 Il5ra         |
| ENSMUSG00000108634  | 17746 RP24-402O2.2  |
| ENSMUSG00000071658  | 17747 Gng3          |
| ENSMUSG00000080923  | 17748 Gm5400        |
| ENSMUSG00000020154  | 17749 Ptprb         |
| ENSMUSG00000092470  | 17750 Gm20518       |
| ENSMUSG00000031448  | 17751 Adprhl1       |
| ENSMUSG00000054931  | 17752 Zkscan4       |
| ENSMUSG00000101004  | 17753 Gm8596        |
| ENSMUSG00000083226  | 17754 Gm7831        |
| ENSMUSG00000030666  | 17755 Calcb         |
| ENSMUSG00000100767  | 17756 Gm3508        |
| ENSMUSG00000005553  | 17757 Atp4a         |
| ENSMUSG00000081187  | 17758 3110067C02Rik |
| ENSMUSG000000057729 | 17759 Prtn3         |
| ENSMUSG00000097317  | 17760 Gm17281       |
| ENSMUSG00000080834  | 17761 Gm15216       |
| ENSMUSG00000092464  | 17762 Gm8902        |
| ENSMUSG00000096375  | 17763 Gm7094        |
| ENSMUSG00000000385  | 17764 Tmprss2       |

|                    |                     |
|--------------------|---------------------|
| ENSMUSG00000100361 | 17765 Gm7063        |
| ENSMUSG00000105599 | 17766 Gm9238        |
| ENSMUSG00000106872 | 17767 Gm2189        |
| ENSMUSG00000092552 | 17768 Gm4287        |
| ENSMUSG00000098438 | 17769 Gm27178       |
| ENSMUSG00000029716 | 17770 Tfr2          |
| ENSMUSG00000026834 | 17771 Acvr1c        |
| ENSMUSG00000096102 | 17772 Gm9167        |
| ENSMUSG00000084393 | 17773 Gm14101       |
| ENSMUSG00000023914 | 17774 Mep1a         |
| ENSMUSG00000089847 | 17775 Timm10b       |
| ENSMUSG00000067219 | 17776 Nipal1        |
| ENSMUSG00000098428 | 17777 Gm2260        |
| ENSMUSG00000097897 | 17778 Rpl31-ps25    |
| ENSMUSG00000079998 | 17779 Gm12947       |
| ENSMUSG00000107578 | 17780 RP23-130D15.4 |
| ENSMUSG00000070713 | 17781 Gm10282       |
| ENSMUSG00000007030 | 17782 Vwa7          |
| ENSMUSG00000097585 | 17783 Gm26529       |
| ENSMUSG00000038630 | 17784 Zkscan16      |
| ENSMUSG00000094974 | 17785 Rps19-ps2     |
| ENSMUSG00000032572 | 17786 Col6a4        |
| ENSMUSG00000059706 | 17787 A830035A12Rik |
| ENSMUSG00000105345 | 17788 BC030343      |
| ENSMUSG00000073737 | 17789 Gm10566       |
| ENSMUSG00000021609 | 17790 Slc6a3        |
| ENSMUSG00000048992 | 17791 Prss32        |
| ENSMUSG00000097558 | 17792 Gm26902       |
| ENSMUSG00000082598 | 17793 Gm15212       |
| ENSMUSG00000102202 | 17794 Gm33280       |
| ENSMUSG00000106322 | 17795 Gm43432       |
| ENSMUSG00000083859 | 17796 Gm12003       |
| ENSMUSG00000047730 | 17797 Fcgbp         |
| ENSMUSG00000040856 | 17798 Dlk1          |
| ENSMUSG00000081884 | 17799 Gm11821       |
| ENSMUSG00000105654 | 17800 Gm29704       |
| ENSMUSG00000081614 | 17801 Gm9436        |
| ENSMUSG00000043870 | 17802 Gm5809        |
| ENSMUSG00000104798 | 17803 Gm20121       |
| ENSMUSG00000097643 | 17804 A130051J06Rik |
| ENSMUSG00000104893 | 17805 Gm2404        |
| ENSMUSG00000073407 | 17806 Gm6034        |



|                     |                      |
|---------------------|----------------------|
| ENSMUSG00000037625  | 17807 Cldn11         |
| ENSMUSG00000097234  | 17808 Gm26518        |
| ENSMUSG00000080825  | 17809 Gm14892        |
| ENSMUSG000000105129 | 17810 Gm19566        |
| ENSMUSG00000040938  | 17811 Slc16a11       |
| ENSMUSG00000097639  | 17812 Platr4         |
| ENSMUSG000000108105 | 17813 CAAA01093158.1 |
| ENSMUSG00000050328  | 17814 Hoxc12         |
| ENSMUSG00000068551  | 17815 Zfp467         |
| ENSMUSG00000084401  | 17816 Gm12586        |
| ENSMUSG00000057606  | 17817 Colq           |
| ENSMUSG00000074987  | 17818 Wt1os          |
| ENSMUSG00000091968  | 17819 Gm17115        |
| ENSMUSG00000034416  | 17820 Pkd1l2         |
| ENSMUSG00000029320  | 17821 1700016H13Rik  |
| ENSMUSG00000075602  | 17822 Ly6a           |
| ENSMUSG00000097624  | 17823 Gm5091         |
| ENSMUSG00000097204  | 17824 Gm17690        |
| ENSMUSG00000098003  | 17825 Gm6317         |
| ENSMUSG000000108638 | 17826 RP23-61L14.4   |
| ENSMUSG000000103703 | 17827 Gm37453        |
| ENSMUSG000000105407 | 17828 Gm36259        |
| ENSMUSG000000108767 | 17829 RP24-191C15.1  |
| ENSMUSG00000028009  | 17830 1700061I17Rik  |
| ENSMUSG00000022431  | 17831 Ribc2          |
| ENSMUSG00000047867  | 17832 Gimap6         |
| ENSMUSG00000019789  | 17833 Hey2           |
| ENSMUSG00000083908  | 17834 Gm6447         |
| ENSMUSG00000054589  | 17835 Gm9949         |
| ENSMUSG00000086680  | 17836 Gm11592        |
| ENSMUSG00000046196  | 17837 Ttc39d         |
| ENSMUSG00000010311  | 17838 Optc           |
| ENSMUSG00000082476  | 17839 Gm12242        |
| ENSMUSG00000044062  | 17840 Plekhd1os      |
| ENSMUSG000000103877 | 17841 Gm21358        |
| ENSMUSG00000028558  | 17842 Calr4          |
| ENSMUSG00000035775  | 17843 Krt20          |
| ENSMUSG00000063651  | 17844 Cnfn           |
| ENSMUSG00000080714  | 17845 Gm14602        |
| ENSMUSG00000027401  | 17846 Tgm3           |
| ENSMUSG00000086470  | 17847 Gm12580        |
| ENSMUSG000000101735 | 17848 Gm18505        |

|                    |                     |
|--------------------|---------------------|
| ENSMUSG00000105889 | 17849 Gm42776       |
| ENSMUSG00000097999 | 17850 Gm9061        |
| ENSMUSG00000024386 | 17851 Proc          |
| ENSMUSG00000080715 | 17852 Gm5406        |
| ENSMUSG00000092557 | 17853 Gm8696        |
| ENSMUSG00000056966 | 17854 Gjc3          |
| ENSMUSG00000039349 | 17855 C130074G19Rik |
| ENSMUSG00000000394 | 17856 Gcg           |
| ENSMUSG00000044626 | 17857 Liph          |
| ENSMUSG00000074483 | 17858 Bglap         |
| ENSMUSG00000081402 | 17859 Gm15455       |
| ENSMUSG00000102563 | 17860 Gm37695       |
| ENSMUSG00000083411 | 17861 Rpl30-ps10    |
| ENSMUSG00000033470 | 17862 Cysltr2       |
| ENSMUSG00000074862 | 17863 BC025920      |
| ENSMUSG00000056203 | 17864 Tas2r135      |
| ENSMUSG00000028451 | 17865 1700022I11Rik |
| ENSMUSG00000092275 | 17866 Gm20465       |
| ENSMUSG00000070637 | 17867 Gm694         |
| ENSMUSG00000097832 | 17868 Gm26912       |
| ENSMUSG00000042429 | 17869 Adora1        |
| ENSMUSG00000086719 | 17870 Gm16275       |
| ENSMUSG00000087622 | 17871 Gm12290       |
| ENSMUSG00000108215 | 17872 RP24-204J8.4  |
| ENSMUSG00000078925 | 17873 D030018L15Rik |
| ENSMUSG00000085667 | 17874 Gm12992       |
| ENSMUSG00000026579 | 17875 F5            |
| ENSMUSG00000060621 | 17876 Nkpd1         |
| ENSMUSG00000079625 | 17877 Tm4sf19       |
| ENSMUSG00000051727 | 17878 Kctd14        |
| ENSMUSG00000091014 | 17879 Gm5244        |
| ENSMUSG00000091345 | 17880 Col6a5        |
| ENSMUSG00000045348 | 17881 Nyap1         |
| ENSMUSG00000024517 | 17882 Grp           |
| ENSMUSG00000027186 | 17883 Elf5          |
| ENSMUSG00000086269 | 17884 Tmcc3os       |
| ENSMUSG00000042508 | 17885 Dmtf1         |
| ENSMUSG00000081201 | 17886 Smt3h2-ps4    |
| ENSMUSG00000081903 | 17887 Gm11387       |
| ENSMUSG00000026188 | 17888 Tmem169       |
| ENSMUSG00000104361 | 17889 Gm38080       |
| ENSMUSG00000105021 | 17890 Gm8234        |

|                    |                     |
|--------------------|---------------------|
| ENSMUSG00000095779 | 17891 Gm2163        |
| ENSMUSG00000085068 | 17892 Gm15895       |
| ENSMUSG00000093507 | 17893 Gm20627       |
| ENSMUSG00000083310 | 17894 Gm5760        |
| ENSMUSG00000094973 | 17895 Gm8994        |
| ENSMUSG00000082845 | 17896 Gm13879       |
| ENSMUSG00000042816 | 17897 Gpr151        |
| ENSMUSG00000083388 | 17898 Gm11550       |
| ENSMUSG00000100007 | 17899 Gm5527        |
| ENSMUSG00000100505 | 17900 Gm13283       |
| ENSMUSG00000020911 | 17901 Krt19         |
| ENSMUSG00000007476 | 17902 Lrrc8a        |
| ENSMUSG00000072931 | 17903 Gm15080       |
| ENSMUSG00000082571 | 17904 Gm8737        |
| ENSMUSG00000082350 | 17905 Gm14008       |
| ENSMUSG00000097532 | 17906 Gm4349        |
| ENSMUSG00000045551 | 17907 Fpr1          |
| ENSMUSG00000095648 | 17908 Gm2004        |
| ENSMUSG00000038963 | 17909 Slco4a1       |
| ENSMUSG00000082893 | 17910 Gm11383       |
| ENSMUSG00000009246 | 17911 Trpm5         |
| ENSMUSG00000102752 | 17912 Gm7694        |
| ENSMUSG00000104162 | 17913 Gm37619       |
| ENSMUSG00000047751 | 17914 Utf1          |
| ENSMUSG00000104227 | 17915 Gm37050       |
| ENSMUSG00000097461 | 17916 Gm26735       |
| ENSMUSG00000082396 | 17917 Zfp389        |
| ENSMUSG00000085304 | 17918 Gm12802       |
| ENSMUSG00000097239 | 17919 Gm27029       |
| ENSMUSG00000095427 | 17920 Rps2-ps6      |
| ENSMUSG00000029373 | 17921 Pf4           |
| ENSMUSG00000102175 | 17922 Gm6119        |
| ENSMUSG00000030500 | 17923 Slc17a6       |
| ENSMUSG00000074342 | 17924 I830077J02Rik |
| ENSMUSG00000038135 | 17925 Crygn         |
| ENSMUSG00000044583 | 17926 Tlr7          |
| ENSMUSG00000080969 | 17927 Gm12372       |
| ENSMUSG00000083602 | 17928 Gm14911       |
| ENSMUSG00000099098 | 17929 1110035H17Rik |
| ENSMUSG00000083838 | 17930 Gm11957       |
| ENSMUSG00000055069 | 17931 Rab39         |
| ENSMUSG00000072772 | 17932 Grcc10        |

|                     |                     |
|---------------------|---------------------|
| ENSMUSG00000059991  | 17933 Nptx2         |
| ENSMUSG00000027931  | 17934 Npr1          |
| ENSMUSG00000085982  | 17935 9530051G07Rik |
| ENSMUSG00000086537  | 17936 Nespas        |
| ENSMUSG00000018387  | 17937 Shroom1       |
| ENSMUSG00000084989  | 17938 Crocc2        |
| ENSMUSG00000087575  | 17939 Gm12976       |
| ENSMUSG00000058447  | 17940 Gm26920       |
| ENSMUSG00000069274  | 17941 Hist1h4f      |
| ENSMUSG00000061527  | 17942 Krt5          |
| ENSMUSG00000054266  | 17943 Serpinb9d     |
| ENSMUSG00000073753  | 17944 Gm10571       |
| ENSMUSG00000063757  | 17945 4632433K11Rik |
| ENSMUSG00000046794  | 17946 Ppp1r3b       |
| ENSMUSG000000100454 | 17947 Gm28901       |
| ENSMUSG000000055202 | 17948 Zfp811        |
| ENSMUSG000000106956 | 17949 Gm19617       |
| ENSMUSG00000034528  | 17950 Hsd17b13      |
| ENSMUSG00000078308  | 17951 Gm7293        |
| ENSMUSG00000083851  | 17952 Gm12365       |
| ENSMUSG00000080847  | 17953 Gm4773        |
| ENSMUSG00000090793  | 17954 Gm6650        |
| ENSMUSG00000029517  | 17955 Ankrd7        |
| ENSMUSG000000100013 | 17956 Gm19480       |
| ENSMUSG00000034450  | 17957 Gulo          |
| ENSMUSG00000091735  | 17958 Gpr62         |
| ENSMUSG00000030235  | 17959 Slco1c1       |
| ENSMUSG00000023439  | 17960 Gnb3          |
| ENSMUSG00000091842  | 17961 Gm16490       |
| ENSMUSG000000104984 | 17962 Gm5982        |
| ENSMUSG00000025386  | 17963 Pde6g         |
| ENSMUSG00000091864  | 17964 Gm17102       |
| ENSMUSG00000040345  | 17965 Arhgap9       |
| ENSMUSG00000082501  | 17966 Gm11835       |
| ENSMUSG00000003410  | 17967 Elavl3        |
| ENSMUSG00000079871  | 17968 Gm4984        |
| ENSMUSG00000022303  | 17969 Dcstamp       |
| ENSMUSG00000046613  | 17970 Vwa5b2        |
| ENSMUSG00000070891  | 17971 Gm12689       |
| ENSMUSG000000103083 | 17972 A630035G10Rik |
| ENSMUSG00000040703  | 17973 Cyp2s1        |
| ENSMUSG00000097587  | 17974 4930578M01Rik |

|                    |                     |
|--------------------|---------------------|
| ENSMUSG00000050423 | 17975 Ppp1r3g       |
| ENSMUSG00000020774 | 17976 Aspa          |
| ENSMUSG00000082295 | 17977 Gm12133       |
| ENSMUSG00000089875 | 17978 Etohd2        |
| ENSMUSG00000102526 | 17979 Gm37785       |
| ENSMUSG00000042662 | 17980 Dusp15        |
| ENSMUSG00000082405 | 17981 Gm16021       |
| ENSMUSG00000103764 | 17982 Gm18382       |
| ENSMUSG00000026621 | 17983 1-Mar         |
| ENSMUSG00000067147 | 17984 Rpl7a-ps11    |
| ENSMUSG00000020651 | 17985 Slc26a4       |
| ENSMUSG00000040505 | 17986 Abcg5         |
| ENSMUSG00000081796 | 17987 Gm9005        |
| ENSMUSG00000040904 | 17988 Gm21988       |
| ENSMUSG00000085658 | 17989 Gm15704       |
| ENSMUSG00000059434 | 17990 Gckr          |
| ENSMUSG00000086557 | 17991 Gm15999       |
| ENSMUSG00000040434 | 17992 Gylt1b        |
| ENSMUSG00000105243 | 17993 Gm43444       |
| ENSMUSG00000108477 | 17994 RP23-179K11.8 |
| ENSMUSG00000022490 | 17995 Ppp1r1a       |
| ENSMUSG00000036334 | 17996 Igsf10        |
| ENSMUSG00000025279 | 17997 Dnase1l3      |
| ENSMUSG00000075592 | 17998 Nynrin        |
| ENSMUSG00000084963 | 17999 Gm14936       |
| ENSMUSG00000081439 | 18000 Gm7840        |
| ENSMUSG00000084217 | 18001 Gm15488       |
| ENSMUSG00000047415 | 18002 Gpr68         |
| ENSMUSG00000083126 | 18003 Gm14109       |
| ENSMUSG00000083624 | 18004 Gm12469       |
| ENSMUSG00000081440 | 18005 Gm12464       |
| ENSMUSG00000007107 | 18006 Atp1a4        |
| ENSMUSG00000001583 | 18007 Tnk1          |
| ENSMUSG00000046456 | 18008 Tmem150b      |
| ENSMUSG00000031789 | 18009 Cngb1         |
| ENSMUSG00000091631 | 18010 Vmn2r95       |
| ENSMUSG00000086420 | 18011 Gm8865        |
| ENSMUSG00000031805 | 18012 Jak3          |
| ENSMUSG00000094985 | 18013 Topaz1        |
| ENSMUSG00000055416 | 18014 Fam136b-ps    |
| ENSMUSG00000027317 | 18015 Ppp1r14d      |
| ENSMUSG00000049620 | 18016 Prss33        |

|                    |                     |
|--------------------|---------------------|
| ENSMUSG00000083481 | 18017 Rps8-ps2      |
| ENSMUSG00000033852 | 18018 Gm28042       |
| ENSMUSG00000103626 | 18019 Gm37358       |
| ENSMUSG00000041559 | 18020 Fmod          |
| ENSMUSG00000059908 | 18021 Mug1          |
| ENSMUSG00000064168 | 18022 Hist1h2bh     |
| ENSMUSG00000073535 | 18023 Gm5532        |
| ENSMUSG00000040600 | 18024 Eps8l3        |
| ENSMUSG00000099758 | 18025 Gm10830       |
| ENSMUSG00000104584 | 18026 Rpl18a-ps3    |
| ENSMUSG00000090698 | 18027 Apold1        |
| ENSMUSG00000060572 | 18028 Mfap2         |
| ENSMUSG00000071181 | 18029 3830408C21Rik |
| ENSMUSG00000098200 | 18030 Gm7763        |
| ENSMUSG00000081169 | 18031 Gm12551       |
| ENSMUSG00000107600 | 18032 RP24-174O2.3  |
| ENSMUSG00000056643 | 18033 Chst13        |
| ENSMUSG00000098100 | 18034 Gm7572        |
| ENSMUSG00000079445 | 18035 B3gnt7        |
| ENSMUSG00000096521 | 18036 Gm13137       |
| ENSMUSG00000064109 | 18037 Hcst          |
| ENSMUSG00000063193 | 18038 Cd300lb       |
| ENSMUSG00000096874 | 18039 Gm10312       |
| ENSMUSG00000097816 | 18040 Gm26811       |
| ENSMUSG00000106734 | 18041 Gm20559       |
| ENSMUSG00000081524 | 18042 Gm11658       |
| ENSMUSG00000108086 | 18043 RP23-111G16.6 |
| ENSMUSG00000101281 | 18044 Gm8449        |
| ENSMUSG00000061923 | 18045 Odf1          |
| ENSMUSG00000049112 | 18046 Oxtr          |
| ENSMUSG00000040093 | 18047 Bmf           |
| ENSMUSG00000060962 | 18048 Dmkn          |
| ENSMUSG00000098083 | 18049 Gm8957        |
| ENSMUSG00000063354 | 18050 Slc39a4       |
| ENSMUSG00000083803 | 18051 Gm12455       |
| ENSMUSG00000079547 | 18052 H2-DMb1       |
| ENSMUSG00000006389 | 18053 Mpl           |
| ENSMUSG00000081500 | 18054 Gm15233       |
| ENSMUSG00000045327 | 18055 6330549D23Rik |
| ENSMUSG00000102648 | 18056 Gm38022       |
| ENSMUSG00000078349 | 18057 AW011738      |
| ENSMUSG00000093489 | 18058 Gm20625       |

|                    |                      |
|--------------------|----------------------|
| ENSMUSG00000085682 | 18059 Gm14267        |
| ENSMUSG00000108115 | 18060 RP24-470M22.14 |
| ENSMUSG00000081084 | 18061 Gm5638         |
| ENSMUSG00000027221 | 18062 Chst1          |
| ENSMUSG00000084338 | 18063 Gm13531        |
| ENSMUSG00000091388 | 18064 Gm17576        |
| ENSMUSG00000021803 | 18065 Cdhr1          |
| ENSMUSG00000050762 | 18066 Prss27         |
| ENSMUSG00000079330 | 18067 Lemd1          |
| ENSMUSG00000086552 | 18068 A730090H04Rik  |
| ENSMUSG00000094991 | 18069 Gm21718        |
| ENSMUSG00000101755 | 18070 Gm29507        |
| ENSMUSG00000027004 | 18071 Frzb           |
| ENSMUSG00000032257 | 18072 Ankk1          |
| ENSMUSG00000101400 | 18073 Gm29596        |
| ENSMUSG00000073739 | 18074 Gm16287        |
| ENSMUSG00000084193 | 18075 Gm6823         |
| ENSMUSG00000101173 | 18076 Gm29519        |
| ENSMUSG00000049892 | 18077 Rasd1          |
| ENSMUSG00000046240 | 18078 Hepacam        |
| ENSMUSG00000020395 | 18079 Itk            |
| ENSMUSG00000069136 | 18080 A130006I12Rik  |
| ENSMUSG00000052496 | 18081 Pkdrej         |
| ENSMUSG00000081847 | 18082 Gm12142        |
| ENSMUSG00000083502 | 18083 Gm14861        |
| ENSMUSG00000049382 | 18084 Krt8           |
| ENSMUSG00000032936 | 18085 Camkv          |
| ENSMUSG00000030731 | 18086 Syt3           |
| ENSMUSG00000054083 | 18087 Capn12         |
| ENSMUSG00000026959 | 18088 Grin1          |
| ENSMUSG00000098640 | 18089 Gm14214        |
| ENSMUSG00000080730 | 18090 Gm11313        |
| ENSMUSG00000086866 | 18091 4930512H18Rik  |
| ENSMUSG00000101855 | 18092 1700010N08Rik  |
| ENSMUSG00000039224 | 18093 D1Pas1         |
| ENSMUSG00000025739 | 18094 Gng13          |
| ENSMUSG00000016995 | 18095 Matn4          |
| ENSMUSG00000082242 | 18096 Gm12443        |
| ENSMUSG00000105744 | 18097 Gm43141        |
| ENSMUSG00000050234 | 18098 Gja4           |
| ENSMUSG00000020839 | 18099 Tmigd1         |
| ENSMUSG00000010021 | 18100 Kif19a         |

|                    |                     |
|--------------------|---------------------|
| ENSMUSG00000108177 | 18101 RP23-461C23.1 |
| ENSMUSG00000021573 | 18102 Tppp          |
| ENSMUSG00000096607 | 18103 7530416G11Rik |
| ENSMUSG00000099250 | 18104 Rn7s2         |
| ENSMUSG00000098140 | 18105 Gm26938       |
| ENSMUSG00000101166 | 18106 Gm28496       |
| ENSMUSG00000084891 | 18107 Gm12958       |
| ENSMUSG00000023333 | 18108 Gcm1          |
| ENSMUSG00000087635 | 18109 Gm13414       |
| ENSMUSG00000100625 | 18110 1700016G22Rik |
| ENSMUSG00000092383 | 18111 H2-Pb         |
| ENSMUSG00000061510 | 18112 Gm10101       |
| ENSMUSG00000025504 | 18113 Eps8l2        |
| ENSMUSG00000078161 | 18114 Erich3        |
| ENSMUSG00000045392 | 18115 Olfr1033      |
| ENSMUSG00000020940 | 18116 1700023F06Rik |
| ENSMUSG00000018569 | 18117 Cldn7         |
| ENSMUSG00000084854 | 18118 Gm12678       |
| ENSMUSG00000082087 | 18119 Gm12138       |
| ENSMUSG00000075408 | 18120 6030408B16Rik |
| ENSMUSG00000034881 | 18121 Tbx2r         |
| ENSMUSG00000094910 | 18122 D430019H16Rik |
| ENSMUSG00000058028 | 18123 Zscan5b       |
| ENSMUSG00000083379 | 18124 Gm4919        |
| ENSMUSG00000029348 | 18125 Asphd2        |
| ENSMUSG00000079038 | 18126 D130040H23Rik |
| ENSMUSG00000093629 | 18127 Prox2os       |
| ENSMUSG00000073413 | 18128 Ly6g6d        |
| ENSMUSG00000004328 | 18129 Hif3a         |
| ENSMUSG00000097184 | 18130 4632428C04Rik |
| ENSMUSG00000099253 | 18131 Gm7863        |
| ENSMUSG00000098179 | 18132 Gm8709        |
| ENSMUSG00000073490 | 18133 Al607873      |
| ENSMUSG00000020891 | 18134 Alox8         |
| ENSMUSG00000025194 | 18135 Abcc2         |
| ENSMUSG00000038670 | 18136 Mybpc2        |
| ENSMUSG00000108466 | 18137 RP23-64D23.7  |
| ENSMUSG00000007877 | 18138 Tcap          |
| ENSMUSG00000080175 | 18139 Tpm3-rs2      |
| ENSMUSG00000087035 | 18140 Tmem74bos     |
| ENSMUSG00000080992 | 18141 Psm5-ps       |
| ENSMUSG00000096751 | 18142 Gm28373       |



|                     |                     |
|---------------------|---------------------|
| ENSMUSG00000024678  | 18143 Ms4a4d        |
| ENSMUSG00000000125  | 18144 Wnt3          |
| ENSMUSG000000081062 | 18145 Gm13640       |
| ENSMUSG000000005089 | 18146 Slc1a2        |
| ENSMUSG00000102083  | 18147 Gm5259        |
| ENSMUSG00000094613  | 18148 A630076J17Rik |
| ENSMUSG000000041608 | 18149 Entpd3        |
| ENSMUSG000000084009 | 18150 Rhox7-ps1     |
| ENSMUSG000000050157 | 18151 Gm867         |
| ENSMUSG000000034117 | 18152 Ptgdr2        |
| ENSMUSG000000024008 | 18153 Cpne5         |
| ENSMUSG000000084368 | 18154 Gm11572       |
| ENSMUSG000000092437 | 18155 Rpl9-ps9      |
| ENSMUSG000000096655 | 18156 1700065D16Rik |
| ENSMUSG000000053310 | 18157 Nrgn          |
| ENSMUSG000000079679 | 18158 Vwde          |
| ENSMUSG000000031786 | 18159 Drc7          |
| ENSMUSG000000035561 | 18160 Aldh1b1       |
| ENSMUSG000000021456 | 18161 Fbp2          |
| ENSMUSG000000079505 | 18162 Gm11131       |
| ENSMUSG000000072884 | 18163 Gm10433       |
| ENSMUSG000000051228 | 18164 Nyx           |
| ENSMUSG000000090098 | 18165 Alms1-ps2     |
| ENSMUSG00000106170  | 18166 Gm43393       |
| ENSMUSG00000103030  | 18167 E330011M16Rik |
| ENSMUSG00000100255  | 18168 Gm28196       |
| ENSMUSG000000033327 | 18169 Tnxb          |
| ENSMUSG000000024770 | 18170 Lipn          |
| ENSMUSG000000046607 | 18171 Hrk           |
| ENSMUSG000000037577 | 18172 Ephx3         |
| ENSMUSG00000104763  | 18173 9830132P13Rik |
| ENSMUSG000000055602 | 18174 Tcp10b        |
| ENSMUSG000000082398 | 18175 Gm11927       |
| ENSMUSG000000019027 | 18176 Dnah1         |
| ENSMUSG00000102399  | 18177 Gm5049        |
| ENSMUSG000000023993 | 18178 Trem1         |
| ENSMUSG000000044737 | 18179 Klk14         |
| ENSMUSG000000082497 | 18180 Gm40          |
| ENSMUSG000000030137 | 18181 Tuba8         |
| ENSMUSG000000048251 | 18182 Bcl11b        |
| ENSMUSG000000097959 | 18183 Gm6931        |
| ENSMUSG00000100782  | 18184 Gm28231       |

|                    |                    |
|--------------------|--------------------|
| ENSMUSG00000080962 | 18185 Gm11453      |
| ENSMUSG00000082955 | 18186 Gm8036       |
| ENSMUSG00000105006 | 18187 Gm9484       |
| ENSMUSG00000078768 | 18188 Zfp566       |
| ENSMUSG00000078762 | 18189 Haus5        |
| ENSMUSG00000087356 | 18190 Gm13856      |
| ENSMUSG00000070298 | 18191 Trcg1        |
| ENSMUSG00000106621 | 18192 Gm42752      |
| ENSMUSG00000037600 | 18193 Kdf1         |
| ENSMUSG00000049565 | 18194 Aknad1       |
| ENSMUSG00000104730 | 18195 Gm42511      |
| ENSMUSG00000027315 | 18196 Spint1       |
| ENSMUSG00000091405 | 18197 Hist2h4      |
| ENSMUSG00000051839 | 18198 Gypa         |
| ENSMUSG00000101904 | 18199 Gm29427      |
| ENSMUSG00000027224 | 18200 Duoxa1       |
| ENSMUSG00000106813 | 18201 Gm7181       |
| ENSMUSG00000003436 | 18202 Dll3         |
| ENSMUSG00000082983 | 18203 Gm12318      |
| ENSMUSG00000062235 | 18204 Gm5341       |
| ENSMUSG00000097921 | 18205 Gm26576      |
| ENSMUSG00000056411 | 18206 Gm12500      |
| ENSMUSG00000090222 | 18207 Gm16340      |
| ENSMUSG00000021342 | 18208 Prl          |
| ENSMUSG00000108140 | 18209 RP23-248L4.6 |
| ENSMUSG00000083081 | 18210 Gm13223      |
| ENSMUSG00000095042 | 18211 Gm12537      |
| ENSMUSG00000044757 | 18212 Gm6430       |
| ENSMUSG00000040829 | 18213 Zmynd15      |
| ENSMUSG00000005864 | 18214 Cnga2        |
| ENSMUSG00000074655 | 18215 Gm1527       |
| ENSMUSG00000047842 | 18216 Diras2       |
| ENSMUSG00000097260 | 18217 Gm5706       |
| ENSMUSG00000035606 | 18218 Ky           |
| ENSMUSG00000097920 | 18219 Gm7784       |
| ENSMUSG00000074527 | 18220 Gm14296      |
| ENSMUSG00000052013 | 18221 Btla         |
| ENSMUSG00000054753 | 18222 AU018091     |
| ENSMUSG00000030220 | 18223 Arhgdib      |
| ENSMUSG00000083485 | 18224 Gm12308      |
| ENSMUSG00000031876 | 18225 Cmtm1        |
| ENSMUSG00000082245 | 18226 Gm6292       |

|                     |                     |
|---------------------|---------------------|
| ENSMUSG00000020709  | 18227 Adap2         |
| ENSMUSG00000064158  | 18228 Izumo1        |
| ENSMUSG00000038357  | 18229 Camp          |
| ENSMUSG00000096883  | 18230 Shisa8        |
| ENSMUSG00000055809  | 18231 Dnaaf3        |
| ENSMUSG00000046916  | 18232 Myct1         |
| ENSMUSG000000105796 | 18233 Gm42845       |
| ENSMUSG00000044534  | 18234 Ackr2         |
| ENSMUSG00000027895  | 18235 Kcnc4         |
| ENSMUSG00000056481  | 18236 Cd248         |
| ENSMUSG00000038903  | 18237 Ccdc68        |
| ENSMUSG00000098017  | 18238 Gm5342        |
| ENSMUSG000000107504 | 18239 RP23-438P19.4 |
| ENSMUSG000000103257 | 18240 Gm7977        |
| ENSMUSG00000097358  | 18241 Gm26773       |
| ENSMUSG00000085844  | 18242 Gm11690       |
| ENSMUSG00000086573  | 18243 Gm15384       |
| ENSMUSG00000083177  | 18244 Gm7820        |
| ENSMUSG00000004366  | 18245 Sst           |
| ENSMUSG00000066721  | 18246 Zfp575        |
| ENSMUSG00000038591  | 18247 Colec10       |
| ENSMUSG00000024747  | 18248 Aldh1a7       |
| ENSMUSG00000041653  | 18249 Pnpla3        |
| ENSMUSG00000044362  | 18250 Ccdc89        |
| ENSMUSG00000054910  | 18251 4931415C17Rik |
| ENSMUSG00000083823  | 18252 Amd-ps1       |
| ENSMUSG00000090099  | 18253 Gm8837        |
| ENSMUSG00000098159  | 18254 Gm21614       |
| ENSMUSG000000106518 | 18255 Gm42759       |
| ENSMUSG00000054191  | 18256 Klf1          |
| ENSMUSG00000090685  | 18257 Gm9047        |
| ENSMUSG00000020357  | 18258 Flt4          |
| ENSMUSG00000054065  | 18259 Pkp3          |
| ENSMUSG00000087698  | 18260 Gm13031       |
| ENSMUSG000000102123 | 18261 Gm4319        |
| ENSMUSG00000085463  | 18262 9430024E24Rik |
| ENSMUSG00000019900  | 18263 Rfx6          |
| ENSMUSG00000047518  | 18264 Slfnl1        |
| ENSMUSG00000000805  | 18265 Car4          |
| ENSMUSG00000097975  | 18266 Gm8079        |
| ENSMUSG00000087667  | 18267 Gm13381       |
| ENSMUSG00000031991  | 18268 Spata19       |

|                     |                     |
|---------------------|---------------------|
| ENSMUSG00000027168  | 18269 Pax6          |
| ENSMUSG00000083335  | 18270 Gm13397       |
| ENSMUSG00000026656  | 18271 Fcgr2b        |
| ENSMUSG000000107672 | 18272 RP24-238J9.6  |
| ENSMUSG000000106648 | 18273 Gm43176       |
| ENSMUSG00000028874  | 18274 Fgr           |
| ENSMUSG00000084414  | 18275 Gm11270       |
| ENSMUSG00000085407  | 18276 1700095J03Rik |
| ENSMUSG00000089665  | 18277 Fcor          |
| ENSMUSG00000013158  | 18278 4933405L10Rik |
| ENSMUSG000000107123 | 18279 Vmn2r-ps25    |
| ENSMUSG000000103906 | 18280 Tigd5         |
| ENSMUSG00000086575  | 18281 Gm14104       |
| ENSMUSG00000034958  | 18282 Atcay         |
| ENSMUSG000000101199 | 18283 Gm9687        |
| ENSMUSG00000021403  | 18284 Serpinb9b     |
| ENSMUSG00000078650  | 18285 G6pc          |
| ENSMUSG000000102418 | 18286 Sh2d1b1       |
| ENSMUSG00000086034  | 18287 Gm15201       |
| ENSMUSG00000034584  | 18288 Exph5         |
| ENSMUSG00000028661  | 18289 Epha8         |
| ENSMUSG00000098246  | 18290 Gm7627        |
| ENSMUSG00000045104  | 18291 Gm5514        |
| ENSMUSG000000100876 | 18292 2810454H06Rik |
| ENSMUSG00000094597  | 18293 Gm4810        |
| ENSMUSG00000084906  | 18294 Gm13794       |
| ENSMUSG00000098143  | 18295 Gm26937       |
| ENSMUSG00000083837  | 18296 Gm14427       |
| ENSMUSG00000040901  | 18297 Kcnk18        |
| ENSMUSG00000087142  | 18298 Gm12454       |
| ENSMUSG000000105221 | 18299 Gm9332        |
| ENSMUSG00000094690  | 18300 1600014C23Rik |
| ENSMUSG00000047485  | 18301 Klhl34        |
| ENSMUSG00000044365  | 18302 Cxxc4         |
| ENSMUSG00000072419  | 18303 Dppa2         |
| ENSMUSG00000040373  | 18304 Cacng5        |
| ENSMUSG00000084282  | 18305 Gm15054       |
| ENSMUSG00000097618  | 18306 Gm26507       |
| ENSMUSG00000061039  | 18307 Olfr920       |
| ENSMUSG000000101129 | 18308 Gm5254        |
| ENSMUSG00000085204  | 18309 Gm15327       |
| ENSMUSG00000026424  | 18310 Gpr37l1       |

|                     |                     |
|---------------------|---------------------|
| ENSMUSG00000074206  | 18311 Adh6b         |
| ENSMUSG00000024922  | 18312 Ovol1         |
| ENSMUSG00000007946  | 18313 Phox2a        |
| ENSMUSG000000082625 | 18314 Gm15204       |
| ENSMUSG00000048865  | 18315 Arhgap30      |
| ENSMUSG000000102514 | 18316 Gm35323       |
| ENSMUSG000000085039 | 18317 Gm15927       |
| ENSMUSG000000081907 | 18318 Gm13731       |
| ENSMUSG000000083804 | 18319 Gm13676       |
| ENSMUSG000000026572 | 18320 Tbx19         |
| ENSMUSG000000073555 | 18321 Gm4951        |
| ENSMUSG000000098195 | 18322 Gm7693        |
| ENSMUSG000000078640 | 18323 Gm11627       |
| ENSMUSG000000026303 | 18324 Mlph          |
| ENSMUSG000000082726 | 18325 Gm11424       |
| ENSMUSG000000026405 | 18326 C4bp          |
| ENSMUSG000000104487 | 18327 Gm31373       |
| ENSMUSG000000031952 | 18328 Chst5         |
| ENSMUSG000000082541 | 18329 Gm9095        |
| ENSMUSG000000108404 | 18330 RP24-300N16.5 |
| ENSMUSG000000097933 | 18331 1700039M10Rik |
| ENSMUSG000000007021 | 18332 Syngn3        |
| ENSMUSG000000102830 | 18333 Gm37012       |
| ENSMUSG000000023000 | 18334 Dhh           |
| ENSMUSG000000037446 | 18335 Tulp1         |
| ENSMUSG000000097928 | 18336 Gm26578       |
| ENSMUSG000000060180 | 18337 Myh13         |
| ENSMUSG000000107815 | 18338 RP23-449F12.6 |
| ENSMUSG000000082302 | 18339 Gm12385       |
| ENSMUSG00000017950  | 18340 Hnf4a         |
| ENSMUSG000000046971 | 18341 Pla2g4f       |
| ENSMUSG000000050106 | 18342 Tmc8          |
| ENSMUSG000000045377 | 18343 Tmem88        |
| ENSMUSG000000043050 | 18344 Tnp2          |
| ENSMUSG000000037820 | 18345 Tgm2          |
| ENSMUSG000000082243 | 18346 Gm3810        |
| ENSMUSG000000038203 | 18347 Hoxa13        |
| ENSMUSG000000078444 | 18348 Gm10941       |
| ENSMUSG000000068876 | 18349 Cgn           |
| ENSMUSG000000021414 | 18350 Fam217a       |
| ENSMUSG000000079657 | 18351 Rab26         |
| ENSMUSG000000033208 | 18352 S100b         |

|                    |                     |
|--------------------|---------------------|
| ENSMUSG00000023039 | 18353 Krt7          |
| ENSMUSG00000085509 | 18354 Gm11521       |
| ENSMUSG00000030606 | 18355 Hapln3        |
| ENSMUSG00000087685 | 18356 1700122E12Rik |
| ENSMUSG00000025347 | 18357 Mettl7b       |
| ENSMUSG00000018776 | 18358 Slc35g3       |
| ENSMUSG00000090256 | 18359 Alms1-ps1     |
| ENSMUSG00000101628 | 18360 Gm28177       |
| ENSMUSG00000074622 | 18361 Mafb          |
| ENSMUSG00000068962 | 18362 Zfp114        |
| ENSMUSG00000037259 | 18363 Dzank1        |
| ENSMUSG00000054036 | 18364 Olfr279       |
| ENSMUSG00000020904 | 18365 Cfp52         |
| ENSMUSG00000036899 | 18366 Trpv5         |
| ENSMUSG00000000632 | 18367 Sez6          |
| ENSMUSG00000104413 | 18368 Gm37065       |
| ENSMUSG00000075402 | 18369 Krt76         |
| ENSMUSG00000104719 | 18370 4933437G19Rik |
| ENSMUSG00000037660 | 18371 Gdf7          |
| ENSMUSG00000085355 | 18372 3010003L21Rik |
| ENSMUSG00000038528 | 18373 BC021785      |
| ENSMUSG00000097073 | 18374 9430037G07Rik |
| ENSMUSG00000101501 | 18375 Rps27a-ps1    |
| ENSMUSG00000032401 | 18376 Lctl          |
| ENSMUSG00000027077 | 18377 Smtnl1        |
| ENSMUSG00000064299 | 18378 4921528I07Rik |
| ENSMUSG00000034959 | 18379 5031414D18Rik |
| ENSMUSG00000021223 | 18380 Papln         |
| ENSMUSG00000058498 | 18381 Rnf207        |
| ENSMUSG00000085559 | 18382 Gm11959       |
| ENSMUSG00000024366 | 18383 Gfra3         |
| ENSMUSG00000069713 | 18384 4933406P04Rik |
| ENSMUSG00000002204 | 18385 Napsa         |
| ENSMUSG00000092225 | 18386 Gm2381        |
| ENSMUSG00000051590 | 18387 Map3k19       |
| ENSMUSG00000036853 | 18388 Mcoln3        |
| ENSMUSG00000046215 | 18389 Rprml         |
| ENSMUSG00000034336 | 18390 Ina           |
| ENSMUSG00000031165 | 18391 Was           |
| ENSMUSG00000053490 | 18392 Trim60        |
| ENSMUSG00000035835 | 18393 Lppr3         |
| ENSMUSG00000043029 | 18394 Trpv3         |

|                    |                     |
|--------------------|---------------------|
| ENSMUSG00000081742 | 18395 Gm9051        |
| ENSMUSG00000050967 | 18396 Creg2         |
| ENSMUSG00000108153 | 18397 RP23-460N4.2  |
| ENSMUSG00000097381 | 18398 A230087F16Rik |
| ENSMUSG00000081055 | 18399 Gm6987        |
| ENSMUSG00000082142 | 18400 Gm13518       |
| ENSMUSG00000094873 | 18401 Gm13812       |
| ENSMUSG00000005836 | 18402 Gata6         |
| ENSMUSG00000106631 | 18403 Gm42669       |
| ENSMUSG00000091926 | 18404 Vmn2r62       |
| ENSMUSG00000030905 | 18405 Crym          |
| ENSMUSG00000098227 | 18406 Gm4812        |
| ENSMUSG00000096269 | 18407 Rpl31-ps21    |
| ENSMUSG00000092097 | 18408 Gm5819        |
| ENSMUSG00000082703 | 18409 Gm11907       |
| ENSMUSG00000039342 | 18410 Ankar         |
| ENSMUSG00000083845 | 18411 Gm14571       |
| ENSMUSG00000046463 | 18412 5930403N24Rik |
| ENSMUSG00000107030 | 18413 Gm5291        |
| ENSMUSG00000036062 | 18414 Phf24         |
| ENSMUSG00000073197 | 18415 5730507C01Rik |
| ENSMUSG00000046280 | 18416 She           |
| ENSMUSG00000017767 | 18417 Spata25       |
| ENSMUSG00000041566 | 18418 Tssk1         |
| ENSMUSG00000034382 | 18419 Al661453      |
| ENSMUSG00000048814 | 18420 Lonrf2        |
| ENSMUSG00000040283 | 18421 Btnl9         |
| ENSMUSG00000083691 | 18422 Gm14465       |
| ENSMUSG00000085665 | 18423 Gm12059       |
| ENSMUSG00000051176 | 18424 Zfp42         |
| ENSMUSG00000104675 | 18425 Gm43689       |
| ENSMUSG00000108592 | 18426 RP23-311C19.3 |
| ENSMUSG00000107921 | 18427 RP23-266D1.2  |
| ENSMUSG00000107705 | 18428 Umad1         |
| ENSMUSG00000055561 | 18429 Spink5        |
| ENSMUSG00000047013 | 18430 Fbxo41        |
| ENSMUSG00000091686 | 18431 4930471C04Rik |
| ENSMUSG00000020810 | 18432 Cygb          |
| ENSMUSG00000101746 | 18433 2310043L19Rik |
| ENSMUSG00000046219 | 18434 C230012O17Rik |
| ENSMUSG00000085289 | 18435 Gm15337       |
| ENSMUSG00000098036 | 18436 Gm8955        |

|                    |                     |
|--------------------|---------------------|
| ENSMUSG00000036446 | 18437 Lum           |
| ENSMUSG00000105836 | 18438 Gm17954       |
| ENSMUSG00000054074 | 18439 Skida1        |
| ENSMUSG00000018740 | 18440 Slc25a35      |
| ENSMUSG00000033576 | 18441 Apol6         |
| ENSMUSG00000060787 | 18442 Olfr464       |
| ENSMUSG00000081693 | 18443 Gm13297       |
| ENSMUSG00000082472 | 18444 Gm13501       |
| ENSMUSG00000041754 | 18445 Trem3         |
| ENSMUSG00000091390 | 18446 Gm17168       |
| ENSMUSG00000063514 | 18447 Gm6756        |
| ENSMUSG00000032946 | 18448 Rasgrp2       |
| ENSMUSG00000091223 | 18449 Gm8775        |
| ENSMUSG00000100894 | 18450 Gm8304        |
| ENSMUSG00000102245 | 18451 Gm37713       |
| ENSMUSG00000089645 | 18452 Gm5766        |
| ENSMUSG00000082432 | 18453 Gm11231       |
| ENSMUSG00000034456 | 18454 Uroc1         |
| ENSMUSG00000058812 | 18455 0610039K10Rik |
| ENSMUSG00000022598 | 18456 Psca          |
| ENSMUSG00000081778 | 18457 Gm6325        |
| ENSMUSG00000054641 | 18458 Mmrn1         |
| ENSMUSG00000105535 | 18459 Gm43077       |
| ENSMUSG00000074804 | 18460 AU015228      |
| ENSMUSG00000034677 | 18461 Gpr142        |
| ENSMUSG00000100590 | 18462 Gm4785        |
| ENSMUSG00000017211 | 18463 Gsdma2        |
| ENSMUSG00000108786 | 18464 RP24-316O13.1 |
| ENSMUSG00000092090 | 18465 Gm3294        |
| ENSMUSG00000041698 | 18466 Slco1a1       |
| ENSMUSG00000097194 | 18467 9330175E14Rik |
| ENSMUSG00000078907 | 18468 Fam186b       |
| ENSMUSG00000035697 | 18469 Hmha1         |
| ENSMUSG00000003341 | 18470 Atp8b3        |
| ENSMUSG00000021211 | 18471 Akr1c12       |
| ENSMUSG00000083342 | 18472 Gm14237       |
| ENSMUSG00000104208 | 18473 Gm37401       |
| ENSMUSG00000033191 | 18474 Tie1          |
| ENSMUSG00000087088 | 18475 Gm16638       |
| ENSMUSG00000021492 | 18476 F12           |
| ENSMUSG00000106164 | 18477 Gm43270       |
| ENSMUSG00000083737 | 18478 Prdx6-ps2     |



|                    |                     |
|--------------------|---------------------|
| ENSMUSG00000082614 | 18479 Gm12149       |
| ENSMUSG00000098157 | 18480 Gm9022        |
| ENSMUSG00000103314 | 18481 Gm38358       |
| ENSMUSG00000075569 | 18482 Rsph10b       |
| ENSMUSG00000097693 | 18483 4930471M09Rik |
| ENSMUSG00000046743 | 18484 Fat4          |
| ENSMUSG00000009731 | 18485 Kcnd1         |
| ENSMUSG00000097728 | 18486 Gm26840       |
| ENSMUSG00000086822 | 18487 5330413P13Rik |
| ENSMUSG00000090486 | 18488 BC035947      |
| ENSMUSG00000021294 | 18489 Kif26a        |
| ENSMUSG00000029005 | 18490 Draxin        |
| ENSMUSG00000096936 | 18491 Gm3510        |
| ENSMUSG00000101086 | 18492 Gm28651       |
| ENSMUSG00000090777 | 18493 Gm7873        |
| ENSMUSG00000085873 | 18494 Ttc39aos1     |
| ENSMUSG00000082240 | 18495 Gm14380       |
| ENSMUSG00000083406 | 18496 Gm8410        |
| ENSMUSG00000060509 | 18497 Xcr1          |
| ENSMUSG00000102881 | 18498 Gm3807        |
| ENSMUSG00000057818 | 18499 1600029O15Rik |
| ENSMUSG00000045620 | 18500 Odf3l1        |
| ENSMUSG00000045281 | 18501 Gpr20         |
| ENSMUSG00000064246 | 18502 Chil1         |
| ENSMUSG00000031079 | 18503 Zfp300        |
| ENSMUSG00000108202 | 18504 RP23-436D14.8 |
| ENSMUSG00000054822 | 18505 1700041G16Rik |
| ENSMUSG00000086111 | 18506 Gm15326       |
| ENSMUSG00000030000 | 18507 Add2          |
| ENSMUSG00000025383 | 18508 Il23a         |
| ENSMUSG00000001943 | 18509 Vsig2         |
| ENSMUSG00000074521 | 18510 Gm14327       |
| ENSMUSG00000097331 | 18511 F420014N23Rik |
| ENSMUSG00000027130 | 18512 Slc12a6       |
| ENSMUSG00000028037 | 18513 Ifi44         |
| ENSMUSG00000062826 | 18514 Ces2f         |
| ENSMUSG00000090265 | 18515 Gm9550        |
| ENSMUSG00000053783 | 18516 1700016K19Rik |
| ENSMUSG00000027249 | 18517 F2            |
| ENSMUSG00000107478 | 18518 Atn1          |
| ENSMUSG00000087119 | 18519 Atg4a-ps      |
| ENSMUSG00000083748 | 18520 Gm11662       |

|                    |                     |
|--------------------|---------------------|
| ENSMUSG00000015314 | 18521 Slamf6        |
| ENSMUSG00000053353 | 18522 2310001K24Rik |
| ENSMUSG00000070997 | 18523 1700055D18Rik |
| ENSMUSG00000046367 | 18524 Mgat4e        |
| ENSMUSG00000027577 | 18525 Chrna4        |
| ENSMUSG00000104986 | 18526 1600023N17Rik |
| ENSMUSG00000083288 | 18527 Csnk2a1-ps    |
| ENSMUSG00000108483 | 18528 RP23-4H17.3   |
| ENSMUSG00000033156 | 18529 Cst10         |
| ENSMUSG00000103966 | 18530 Gm37120       |
| ENSMUSG00000096745 | 18531 Gm12622       |
| ENSMUSG00000084939 | 18532 Gm830         |
| ENSMUSG00000050592 | 18533 Fam78a        |
| ENSMUSG00000050578 | 18534 Mmp13         |
| ENSMUSG00000020884 | 18535 Asgr1         |
| ENSMUSG00000082054 | 18536 Psmb6-ps      |
| ENSMUSG00000042306 | 18537 S100a14       |
| ENSMUSG00000009292 | 18538 Trpm2         |
| ENSMUSG00000031958 | 18539 Ldhd          |
| ENSMUSG00000101953 | 18540 Gm29241       |
| ENSMUSG00000083548 | 18541 Gm11514       |
| ENSMUSG00000074652 | 18542 Myh7b         |
| ENSMUSG00000070732 | 18543 Rbm44         |
| ENSMUSG00000097734 | 18544 B930082K07Rik |
| ENSMUSG00000101564 | 18545 Gm5703        |
| ENSMUSG00000101206 | 18546 Gm5266        |
| ENSMUSG00000108472 | 18547 RP23-84M17.5  |
| ENSMUSG00000046750 | 18548 BC089491      |
| ENSMUSG00000075335 | 18549 4930588K23Rik |
| ENSMUSG00000015083 | 18550 C8g           |
| ENSMUSG00000069763 | 18551 Tmem100       |
| ENSMUSG00000044676 | 18552 Zfp612        |
| ENSMUSG00000081391 | 18553 Gm11765       |
| ENSMUSG00000069083 | 18554 Gm10259       |
| ENSMUSG00000106784 | 18555 Gm43309       |
| ENSMUSG00000083978 | 18556 Gm5060        |
| ENSMUSG00000061577 | 18557 Adgrg5        |
| ENSMUSG00000106971 | 18558 Gm42965       |
| ENSMUSG00000099681 | 18559 1700052K11Rik |
| ENSMUSG00000029503 | 18560 P2rx2         |
| ENSMUSG00000098005 | 18561 Gm6114        |
| ENSMUSG00000024223 | 18562 Armc12        |

|                    |                     |
|--------------------|---------------------|
| ENSMUSG00000045631 | 18563 Tmprss12      |
| ENSMUSG00000041329 | 18564 Atp1b2        |
| ENSMUSG00000067215 | 18565 Usp51         |
| ENSMUSG00000055782 | 18566 Abcd2         |
| ENSMUSG00000096950 | 18567 Gm9530        |
| ENSMUSG00000097714 | 18568 Gm20109       |
| ENSMUSG00000083601 | 18569 Gm12028       |
| ENSMUSG00000085256 | 18570 Dmrta2os      |
| ENSMUSG00000068245 | 18571 Phf11d        |
| ENSMUSG00000099617 | 18572 Gm6550        |
| ENSMUSG00000107043 | 18573 Gm42849       |
| ENSMUSG00000034652 | 18574 Cd300a        |
| ENSMUSG00000052724 | 18575 Gm9888        |
| ENSMUSG00000091383 | 18576 Hist1h2al     |
| ENSMUSG00000047658 | 18577 Gal3st3       |
| ENSMUSG00000021943 | 18578 Gdf10         |
| ENSMUSG00000075359 | 18579 Gm20775       |
| ENSMUSG00000038607 | 18580 Gng10         |
| ENSMUSG00000081991 | 18581 Gm13859       |
| ENSMUSG00000042115 | 18582 Klhdc8a       |
| ENSMUSG00000104168 | 18583 Gm38250       |
| ENSMUSG00000085610 | 18584 Gm14747       |
| ENSMUSG00000037529 | 18585 Prss40        |
| ENSMUSG00000062727 | 18586 Hist1h2bk     |
| ENSMUSG00000000318 | 18587 Clec10a       |
| ENSMUSG00000087008 | 18588 Gm5530        |
| ENSMUSG00000073494 | 18589 Sh2d1b2       |
| ENSMUSG00000094256 | 18590 Rpl21-ps7     |
| ENSMUSG00000086555 | 18591 Gm13446       |
| ENSMUSG00000078632 | 18592 Lrrc37a       |
| ENSMUSG00000096861 | 18593 Vmn2r68       |
| ENSMUSG00000001095 | 18594 Slc13a2       |
| ENSMUSG00000107142 | 18595 4930566F21Rik |
| ENSMUSG00000039364 | 18596 Sectm1b       |
| ENSMUSG00000030607 | 18597 Acan          |
| ENSMUSG00000107684 | 18598 Rab5a-ps      |
| ENSMUSG00000100147 | 18599 1700047M11Rik |
| ENSMUSG00000098348 | 18600 Btg1-ps2      |
| ENSMUSG00000073375 | 18601 Lrrc30        |
| ENSMUSG00000020676 | 18602 Ccl11         |
| ENSMUSG00000024172 | 18603 St6gal2       |
| ENSMUSG00000026979 | 18604 Psd4          |

|                    |                     |
|--------------------|---------------------|
| ENSMUSG00000043496 | 18605 Tril          |
| ENSMUSG00000027015 | 18606 Cybrd1        |
| ENSMUSG00000097230 | 18607 Gm26853       |
| ENSMUSG00000033981 | 18608 Gria2         |
| ENSMUSG00000031826 | 18609 Usp10         |
| ENSMUSG00000075316 | 18610 Scn9a         |
| ENSMUSG00000049576 | 18611 Zfa-ps        |
| ENSMUSG00000098678 | 18612 Mroh6         |
| ENSMUSG00000090671 | 18613 Gm5067        |
| ENSMUSG00000101731 | 18614 3830432H09Rik |
| ENSMUSG00000038760 | 18615 Trhr          |
| ENSMUSG00000036553 | 18616 Sh3tc1        |
| ENSMUSG00000106640 | 18617 Gm20940       |
| ENSMUSG00000097699 | 18618 5430400D12Rik |
| ENSMUSG00000081199 | 18619 Gm16407       |
| ENSMUSG00000001665 | 18620 Gstt3         |
| ENSMUSG00000082835 | 18621 Gm13118       |
| ENSMUSG00000068105 | 18622 Tnfrsf13c     |
| ENSMUSG00000023902 | 18623 Zscan10       |
| ENSMUSG00000081624 | 18624 Gm6912        |
| ENSMUSG00000086913 | 18625 Gm14019       |
| ENSMUSG00000097450 | 18626 Gm26893       |
| ENSMUSG00000026805 | 18627 Barhl1        |
| ENSMUSG00000086735 | 18628 Gm13977       |
| ENSMUSG00000097543 | 18629 Gm805         |
| ENSMUSG00000097310 | 18630 A930038B10Rik |
| ENSMUSG00000062905 | 18631 Vmn1r32       |
| ENSMUSG00000082671 | 18632 Gm14006       |
| ENSMUSG00000097404 | 18633 Gm10814       |
| ENSMUSG00000091491 | 18634 Vmn2r97       |
| ENSMUSG00000046352 | 18635 Gjb2          |
| ENSMUSG00000072618 | 18636 Gm10384       |
| ENSMUSG00000050241 | 18637 Klre1         |
| ENSMUSG00000104662 | 18638 Gm43267       |
| ENSMUSG00000087604 | 18639 Cdrt4os1      |
| ENSMUSG00000068762 | 18640 Gstm6         |
| ENSMUSG00000037579 | 18641 Kcnh3         |
| ENSMUSG00000053375 | 18642 Atp6v1e2      |
| ENSMUSG00000096847 | 18643 Tmem151b      |
| ENSMUSG00000029868 | 18644 Trpv6         |
| ENSMUSG00000086340 | 18645 1810059C17Rik |
| ENSMUSG00000031965 | 18646 Tbx20         |

|                    |                     |
|--------------------|---------------------|
| ENSMUSG00000103006 | 18647 4933417C20Rik |
| ENSMUSG00000033453 | 18648 Adamts15      |
| ENSMUSG00000078906 | 18649 Gm14444       |
| ENSMUSG00000026560 | 18650 Fmo9          |
| ENSMUSG00000098012 | 18651 Gm8907        |
| ENSMUSG00000031919 | 18652 Tmed6         |
| ENSMUSG00000081212 | 18653 Gm6964        |
| ENSMUSG00000048852 | 18654 Gm12185       |
| ENSMUSG00000044024 | 18655 Rell2         |
| ENSMUSG00000081467 | 18656 Gm13337       |
| ENSMUSG00000097883 | 18657 Gm8357        |
| ENSMUSG00000023078 | 18658 Cxcl13        |
| ENSMUSG00000024175 | 18659 Tekt4         |
| ENSMUSG00000106898 | 18660 Gm43125       |
| ENSMUSG00000091806 | 18661 Gm5258        |
| ENSMUSG00000041062 | 18662 Mslnl         |
| ENSMUSG00000081490 | 18663 Gm11830       |
| ENSMUSG00000107775 | 18664 RP23-111G16.5 |
| ENSMUSG00000011305 | 18665 Plin5         |
| ENSMUSG00000101449 | 18666 Gm17791       |
| ENSMUSG00000049097 | 18667 Ankrd34a      |
| ENSMUSG00000027356 | 18668 Fermt1        |
| ENSMUSG00000105054 | 18669 Gm43664       |
| ENSMUSG00000046487 | 18670 Mospd4        |
| ENSMUSG00000082532 | 18671 Rpl31-ps6     |
| ENSMUSG00000101860 | 18672 Fam188b2-ps   |
| ENSMUSG00000082368 | 18673 Gm11225       |
| ENSMUSG00000083025 | 18674 Gm11829       |
| ENSMUSG00000059305 | 18675 Vpreb1        |
| ENSMUSG00000078626 | 18676 Gm12790       |
| ENSMUSG00000020875 | 18677 Hoxb9         |
| ENSMUSG00000002831 | 18678 Plin4         |
| ENSMUSG00000062044 | 18679 Lmtk3         |
| ENSMUSG00000107173 | 18680 Gm43266       |
| ENSMUSG00000017734 | 18681 Dbndd2        |
| ENSMUSG00000098193 | 18682 Gm26963       |
| ENSMUSG00000025330 | 18683 Padi4         |
| ENSMUSG00000094136 | 18684 Gm5973        |
| ENSMUSG00000057836 | 18685 Xlr3a         |
| ENSMUSG00000102710 | 18686 Gm4857        |
| ENSMUSG00000086779 | 18687 Gm13562       |
| ENSMUSG00000087326 | 18688 Gm12503       |

|                     |                     |
|---------------------|---------------------|
| ENSMUSG00000047894  | 18689 Ang2          |
| ENSMUSG00000042286  | 18690 Stab1         |
| ENSMUSG00000003469  | 18691 Phyhip        |
| ENSMUSG000000098164 | 18692 Gm5493        |
| ENSMUSG00000004542  | 18693 Psg19         |
| ENSMUSG00000097757  | 18694 Gm17518       |
| ENSMUSG000000107306 | 18695 Gm42577       |
| ENSMUSG00000090387  | 18696 Gm17056       |
| ENSMUSG00000082312  | 18697 Gm11996       |
| ENSMUSG00000092534  | 18698 Pagr1b        |
| ENSMUSG00000068037  | 18699 Mas1          |
| ENSMUSG000000103242 | 18700 Gm34767       |
| ENSMUSG00000085993  | 18701 Gm15905       |
| ENSMUSG00000066964  | 18702 Tmem211       |
| ENSMUSG00000022996  | 18703 Wnt10b        |
| ENSMUSG00000085589  | 18704 A430078I02Rik |
| ENSMUSG00000029861  | 18705 Fam131b       |
| ENSMUSG00000082600  | 18706 Gm9673        |
| ENSMUSG00000097236  | 18707 4831440E17Rik |
| ENSMUSG00000025955  | 18708 Akr1cl        |
| ENSMUSG00000025746  | 18709 Il6           |
| ENSMUSG00000025877  | 18710 Hk3           |
| ENSMUSG00000090707  | 18711 Gm8237        |
| ENSMUSG00000095179  | 18712 Gm21638       |
| ENSMUSG00000048905  | 18713 4930539E08Rik |
| ENSMUSG00000045364  | 18714 Ifne          |
| ENSMUSG00000038009  | 18715 Dnajc22       |
| ENSMUSG00000082730  | 18716 Gm11363       |
| ENSMUSG00000070877  | 18717 Ldlrad1       |
| ENSMUSG000000104555 | 18718 Gm5983        |
| ENSMUSG00000047507  | 18719 Baiap3        |
| ENSMUSG00000083488  | 18720 Gm8534        |
| ENSMUSG00000079339  | 18721 Ifit1bl1      |
| ENSMUSG00000031886  | 18722 Ces2e         |
| ENSMUSG00000091859  | 18723 Vmn2r100      |
| ENSMUSG00000049699  | 18724 Ucn2          |
| ENSMUSG00000041165  | 18725 Spem1         |
| ENSMUSG00000098754  | 18726 Gm28045       |
| ENSMUSG00000058260  | 18727 Serpina9      |
| ENSMUSG00000098162  | 18728 Gm26976       |
| ENSMUSG000000107891 | 18729 RP23-330J17.3 |
| ENSMUSG00000081138  | 18730 Gm12834       |

|                     |                     |
|---------------------|---------------------|
| ENSMUSG00000026969  | 18731 Fam166a       |
| ENSMUSG00000054134  | 18732 Umodl1        |
| ENSMUSG00000002384  | 18733 Bmp8b         |
| ENSMUSG000000090125 | 18734 Pou3f1        |
| ENSMUSG000000081230 | 18735 Gm9097        |
| ENSMUSG00000054598  | 18736 9130230L23Rik |
| ENSMUSG00000055333  | 18737 Fat2          |
| ENSMUSG00000048022  | 18738 Tmem229a      |
| ENSMUSG00000051251  | 18739 Nhlh1         |
| ENSMUSG00000004892  | 18740 Bcan          |
| ENSMUSG00000056418  | 18741 BC043934      |
| ENSMUSG00000044708  | 18742 Kcnj10        |
| ENSMUSG000000106883 | 18743 Gm43632       |
| ENSMUSG000000097993 | 18744 Ptprv         |
| ENSMUSG000000083508 | 18745 Gm6027        |
| ENSMUSG000000028039 | 18746 Efna3         |
| ENSMUSG000000083580 | 18747 Rpsa-ps3      |
| ENSMUSG00000058740  | 18748 Kcnt1         |
| ENSMUSG000000027009 | 18749 Itga4         |
| ENSMUSG000000092392 | 18750 Gm20546       |
| ENSMUSG000000099707 | 18751 Gm8883        |
| ENSMUSG000000018656 | 18752 Tcaf3         |
| ENSMUSG000000082289 | 18753 Gm15596       |
| ENSMUSG000000090303 | 18754 Vmn2r-ps3     |
| ENSMUSG000000074219 | 18755 Gm10644       |
| ENSMUSG000000083395 | 18756 Gm11203       |
| ENSMUSG000000025573 | 18757 6030468B19Rik |
| ENSMUSG000000104972 | 18758 Gm19931       |
| ENSMUSG000000106068 | 18759 Gm9497        |
| ENSMUSG000000078487 | 18760 Ankrd65       |
| ENSMUSG000000090658 | 18761 Prss47        |
| ENSMUSG000000034768 | 18762 Asb16         |
| ENSMUSG000000043661 | 18763 Gm9785        |
| ENSMUSG000000097823 | 18764 Gm16701       |
| ENSMUSG000000035686 | 18765 Thrsp         |
| ENSMUSG000000103755 | 18766 Gm37805       |
| ENSMUSG000000018930 | 18767 Ccl4          |
| ENSMUSG000000061825 | 18768 Ces2c         |
| ENSMUSG000000095486 | 18769 Vmn2r22       |
| ENSMUSG000000044217 | 18770 Aqp5          |
| ENSMUSG000000008461 | 18771 Fut1          |
| ENSMUSG000000056529 | 18772 Ptafr         |

|                    |                     |
|--------------------|---------------------|
| ENSMUSG00000106508 | 18773 4933425M03Rik |
| ENSMUSG00000096887 | 18774 Gm20594       |
| ENSMUSG00000015970 | 18775 Chdh          |
| ENSMUSG00000078865 | 18776 Gm14406       |
| ENSMUSG00000081185 | 18777 Gm4852        |
| ENSMUSG00000098038 | 18778 Gm8793        |
| ENSMUSG00000026468 | 18779 Lhx4          |
| ENSMUSG00000099398 | 18780 Ms4a14        |
| ENSMUSG00000103155 | 18781 Gm8109        |
| ENSMUSG00000073403 | 18782 Gm10499       |
| ENSMUSG00000073482 | 18783 Gm10517       |
| ENSMUSG00000036136 | 18784 Fam110c       |
| ENSMUSG00000094215 | 18785 Gm6489        |
| ENSMUSG00000054618 | 18786 Gm9951        |
| ENSMUSG00000082254 | 18787 Gm11922       |
| ENSMUSG00000105340 | 18788 Gm42878       |
| ENSMUSG00000097791 | 18789 Gm17315       |
| ENSMUSG00000001670 | 18790 Tat           |
| ENSMUSG00000081973 | 18791 Gm13600       |
| ENSMUSG00000075480 | 18792 Gm10840       |
| ENSMUSG00000106035 | 18793 Gm43545       |
| ENSMUSG00000039552 | 18794 Rsph4a        |
| ENSMUSG00000044694 | 18795 2010007H06Rik |
| ENSMUSG00000026751 | 18796 Nr5a1         |
| ENSMUSG00000107685 | 18797 RP24-554L15.1 |
| ENSMUSG00000022758 | 18798 P2rx6         |
| ENSMUSG00000001349 | 18799 Cnn1          |
| ENSMUSG00000028876 | 18800 Epha10        |
| ENSMUSG00000103400 | 18801 Gm15853       |
| ENSMUSG00000101986 | 18802 Gm6198        |
| ENSMUSG00000027875 | 18803 Hmgcs2        |
| ENSMUSG00000023011 | 18804 Faim2         |
| ENSMUSG00000026548 | 18805 Slamf9        |
| ENSMUSG00000091230 | 18806 Gm6970        |
| ENSMUSG00000034872 | 18807 Gipc3         |
| ENSMUSG00000097399 | 18808 Gm26555       |
| ENSMUSG00000099041 | 18809 Gm28035       |
| ENSMUSG00000055882 | 18810 Abhd16b       |
| ENSMUSG00000020135 | 18811 Apc2          |
| ENSMUSG00000038268 | 18812 Ovca2         |
| ENSMUSG00000071237 | 18813 Gm6253        |
| ENSMUSG00000091401 | 18814 Gm9252        |



|                     |                     |
|---------------------|---------------------|
| ENSMUSG00000038415  | 18815 Foxq1         |
| ENSMUSG00000051295  | 18816 9630028B13Rik |
| ENSMUSG00000024485  | 18817 Slc4a9        |
| ENSMUSG00000085084  | 18818 4930570G19Rik |
| ENSMUSG00000003166  | 18819 Dgcr2         |
| ENSMUSG00000097602  | 18820 4930519P11Rik |
| ENSMUSG00000092200  | 18821 Tnxa          |
| ENSMUSG00000010825  | 18822 Grid2ip       |
| ENSMUSG000000105901 | 18823 Gm7291        |
| ENSMUSG00000081880  | 18824 Gm5385        |
| ENSMUSG00000084148  | 18825 Gm12380       |
| ENSMUSG00000044393  | 18826 Dsg2          |
| ENSMUSG00000028362  | 18827 Tnfsf8        |
| ENSMUSG00000082511  | 18828 Gm4915        |
| ENSMUSG000000108353 | 18829 RP24-144C5.1  |
| ENSMUSG00000020826  | 18830 Nos2          |
| ENSMUSG00000068099  | 18831 1500009C09Rik |
| ENSMUSG000000103944 | 18832 Rpl26-ps3     |
| ENSMUSG00000085408  | 18833 C530005A16Rik |
| ENSMUSG000000107020 | 18834 Gm6051        |
| ENSMUSG00000099162  | 18835 Gm27168       |
| ENSMUSG00000083654  | 18836 Gm11875       |
| ENSMUSG00000032125  | 18837 Robo4         |
| ENSMUSG00000068537  | 18838 Gm10242       |
| ENSMUSG00000024331  | 18839 Dsc2          |
| ENSMUSG00000080054  | 18840 Rpl12-ps1     |
| ENSMUSG000000102274 | 18841 Gm4855        |
| ENSMUSG00000039231  | 18842 Suv39h1       |
| ENSMUSG00000035200  | 18843 Chrn4         |
| ENSMUSG00000030945  | 18844 Acsm2         |
| ENSMUSG00000094437  | 18845 Gm9830        |
| ENSMUSG000000105792 | 18846 Gm17887       |
| ENSMUSG00000087569  | 18847 Gm8464        |
| ENSMUSG00000022986  | 18848 Krt75         |
| ENSMUSG00000040706  | 18849 Agmat         |
| ENSMUSG00000073388  | 18850 A330017A19Rik |
| ENSMUSG00000095334  | 18851 Gm21984       |
| ENSMUSG00000096798  | 18852 Gm6309        |
| ENSMUSG00000063543  | 18853 Gm5616        |
| ENSMUSG00000095826  | 18854 Gm9002        |
| ENSMUSG00000028784  | 18855 Spocd1        |
| ENSMUSG00000038064  | 18856 Cldn22        |

|                    |                     |
|--------------------|---------------------|
| ENSMUSG00000058470 | 18857 Gm8369        |
| ENSMUSG00000081445 | 18858 Rpl23a-ps4    |
| ENSMUSG00000017453 | 18859 Pipox         |
| ENSMUSG00000042372 | 18860 Dmrt3         |
| ENSMUSG00000036960 | 18861 Clca2         |
| ENSMUSG00000097476 | 18862 Gm26583       |
| ENSMUSG00000086605 | 18863 Gm14290       |
| ENSMUSG00000103878 | 18864 Gm8197        |
| ENSMUSG00000102619 | 18865 Gm37849       |
| ENSMUSG00000062585 | 18866 Cnr2          |
| ENSMUSG00000105522 | 18867 Gm15235       |
| ENSMUSG00000083119 | 18868 Gm14724       |
| ENSMUSG00000075277 | 18869 Haglr         |
| ENSMUSG00000022577 | 18870 Ly6h          |
| ENSMUSG00000085636 | 18871 Gm11769       |
| ENSMUSG00000031450 | 18872 Grk1          |
| ENSMUSG00000101645 | 18873 Gm28635       |
| ENSMUSG00000081750 | 18874 Gm4995        |
| ENSMUSG00000058622 | 18875 Gm5265        |
| ENSMUSG00000059562 | 18876 Ccdc154       |
| ENSMUSG00000106712 | 18877 Gm19649       |
| ENSMUSG00000108806 | 18878 RP24-443B5.5  |
| ENSMUSG00000105551 | 18879 Gm43199       |
| ENSMUSG00000106438 | 18880 Gm42749       |
| ENSMUSG00000047021 | 18881 Ccdc108       |
| ENSMUSG00000046323 | 18882 Dppa3         |
| ENSMUSG00000035699 | 18883 Slc51a        |
| ENSMUSG00000073001 | 18884 Cylc1         |
| ENSMUSG00000085987 | 18885 Gm13403       |
| ENSMUSG00000091034 | 18886 Gm17660       |
| ENSMUSG00000096052 | 18887 9930004E17Rik |
| ENSMUSG00000101576 | 18888 Gm20915       |
| ENSMUSG00000026736 | 18889 4930426L09Rik |
| ENSMUSG00000101945 | 18890 Gm29138       |
| ENSMUSG00000096795 | 18891 Zfp433        |
| ENSMUSG00000019232 | 18892 Etnppl        |
| ENSMUSG00000053358 | 18893 Gm9905        |
| ENSMUSG00000082357 | 18894 Gm13542       |
| ENSMUSG00000100383 | 18895 Gm28688       |
| ENSMUSG00000098029 | 18896 Gm7745        |
| ENSMUSG00000023083 | 18897 H2-M10.2      |
| ENSMUSG00000024738 | 18898 Pga5          |

|                     |                     |
|---------------------|---------------------|
| ENSMUSG00000038354  | 18899 Ankrd35       |
| ENSMUSG00000033770  | 18900 Clcnka        |
| ENSMUSG00000086448  | 18901 9330162012Rik |
| ENSMUSG000000103419 | 18902 Gm29808       |
| ENSMUSG00000005232  | 18903 G6pc2         |
| ENSMUSG00000028965  | 18904 Tnfrsf9       |
| ENSMUSG00000097876  | 18905 Gm16892       |
| ENSMUSG00000030154  | 18906 Klrb1f        |
| ENSMUSG00000084012  | 18907 Gm11956       |
| ENSMUSG000000100218 | 18908 Gm8296        |
| ENSMUSG000000106927 | 18909 Gm43598       |
| ENSMUSG00000097379  | 18910 Gm26873       |
| ENSMUSG00000033872  | 18911 Best4-ps      |
| ENSMUSG000000106853 | 18912 Gm7492        |
| ENSMUSG00000046410  | 18913 Kcnk6         |
| ENSMUSG00000087652  | 18914 Gm15918       |
| ENSMUSG00000090122  | 18915 Kcne1l        |
| ENSMUSG00000094219  | 18916 Calhm3        |
| ENSMUSG00000042784  | 18917 Muc1          |
| ENSMUSG00000050195  | 18918 Scd4          |
| ENSMUSG00000089998  | 18919 Phtf1os       |
| ENSMUSG00000081844  | 18920 Gm11241       |
| ENSMUSG000000106080 | 18921 Gm8836        |
| ENSMUSG00000089698  | 18922 Gm2541        |
| ENSMUSG00000013415  | 18923 Igf2bp1       |
| ENSMUSG000000101949 | 18924 Gm5370        |
| ENSMUSG00000025329  | 18925 Padi1         |
| ENSMUSG00000053963  | 18926 6330403A02Rik |
| ENSMUSG00000074506  | 18927 Gm10705       |
| ENSMUSG00000071860  | 18928 2900055J20Rik |
| ENSMUSG000000106182 | 18929 Gm7442        |
| ENSMUSG00000047515  | 18930 BC049715      |
| ENSMUSG00000062327  | 18931 T             |
| ENSMUSG000000105896 | 18932 Gm43311       |
| ENSMUSG00000037801  | 18933 Iqch          |
| ENSMUSG000000104517 | 18934 Gm18407       |
| ENSMUSG00000023032  | 18935 Slc4a8        |
| ENSMUSG00000091366  | 18936 Gm17040       |
| ENSMUSG00000081653  | 18937 Gm11354       |
| ENSMUSG00000025219  | 18938 Fgf8          |
| ENSMUSG00000059898  | 18939 Dsc3          |
| ENSMUSG00000081775  | 18940 Gm12420       |

|                    |                     |
|--------------------|---------------------|
| ENSMUSG00000092318 | 18941 Vmn1r-ps60    |
| ENSMUSG00000105633 | 18942 Gm32158       |
| ENSMUSG00000107451 | 18943 RP23-370A2.7  |
| ENSMUSG00000073402 | 18944 Gm8909        |
| ENSMUSG00000107508 | 18945 RP23-472N21.2 |
| ENSMUSG00000057092 | 18946 Fxyd3         |
| ENSMUSG00000032083 | 18947 Aboa1         |
| ENSMUSG00000082390 | 18948 Gm12136       |
| ENSMUSG00000074671 | 18949 Tspyl3        |
| ENSMUSG00000094614 | 18950 Gm21769       |
| ENSMUSG00000025644 | 18951 Gm7628        |
| ENSMUSG00000100210 | 18952 Hist1h3f      |
| ENSMUSG00000022818 | 18953 Cyp2ab1       |
| ENSMUSG00000040710 | 18954 St8sia4       |
| ENSMUSG00000045991 | 18955 Onecut2       |
| ENSMUSG00000031224 | 18956 Magee2        |
| ENSMUSG00000055763 | 18957 Rybp-ps       |
| ENSMUSG00000080857 | 18958 Gm12859       |
| ENSMUSG00000024578 | 18959 Il17b         |
| ENSMUSG00000085421 | 18960 4732490B19Rik |
| ENSMUSG00000052157 | 18961 Gm650         |
| ENSMUSG00000043747 | 18962 1520401A03Rik |
| ENSMUSG00000087390 | 18963 Gm7598        |
| ENSMUSG00000093536 | 18964 Smim17        |
| ENSMUSG00000097398 | 18965 Platr5        |
| ENSMUSG00000104113 | 18966 Gm37292       |
| ENSMUSG00000042254 | 18967 Cilp          |
| ENSMUSG00000024737 | 18968 Slc15a3       |
| ENSMUSG00000105422 | 18969 Gm6089        |
| ENSMUSG00000081112 | 18970 Gm12140       |
| ENSMUSG00000083926 | 18971 Gm14783       |
| ENSMUSG00000040467 | 18972 4921522P10Rik |
| ENSMUSG00000106987 | 18973 Gm42575       |
| ENSMUSG00000097271 | 18974 Gm9903        |
| ENSMUSG00000019842 | 18975 Traf3ip2      |
| ENSMUSG00000042414 | 18976 Prdm14        |
| ENSMUSG00000080798 | 18977 Gm5135        |
| ENSMUSG00000103570 | 18978 C630004M23Rik |
| ENSMUSG00000027229 | 18979 4933406J08Rik |
| ENSMUSG00000070979 | 18980 Actl7a        |
| ENSMUSG00000031444 | 18981 F10           |
| ENSMUSG00000094635 | 18982 Gm7104        |

|                    |                     |
|--------------------|---------------------|
| ENSMUSG00000026921 | 18983 Egfl7         |
| ENSMUSG00000020734 | 18984 Grin2c        |
| ENSMUSG00000046245 | 18985 Pilra         |
| ENSMUSG00000086873 | 18986 Gm15672       |
| ENSMUSG00000090475 | 18987 Gm6245        |
| ENSMUSG00000073164 | 18988 2410018L13Rik |
| ENSMUSG00000069315 | 18989 Gm7731        |
| ENSMUSG00000107575 | 18990 RP23-258B18.2 |
| ENSMUSG00000087114 | 18991 Gm16099       |
| ENSMUSG00000030324 | 18992 Rho           |
| ENSMUSG00000078810 | 18993 Gp6           |
| ENSMUSG00000031594 | 18994 Fgl1          |
| ENSMUSG00000082727 | 18995 Gm13260       |
| ENSMUSG00000108080 | 18996 RP24-179P9.2  |
| ENSMUSG00000081050 | 18997 Gm12461       |
| ENSMUSG00000093752 | 18998 Gm20716       |
| ENSMUSG00000016349 | 18999 Eef1a2        |
| ENSMUSG00000052392 | 19000 Acot4         |
| ENSMUSG00000108221 | 19001 RP23-83N10.3  |
| ENSMUSG00000055210 | 19002 Foxd2         |
| ENSMUSG00000101595 | 19003 Gm29395       |
| ENSMUSG00000020681 | 19004 Ace           |
| ENSMUSG00000105540 | 19005 Gm7988        |
| ENSMUSG00000082038 | 19006 Gm12071       |
| ENSMUSG00000105044 | 19007 Gm10416       |
| ENSMUSG00000028011 | 19008 Tdo2          |
| ENSMUSG00000102538 | 19009 Gm37230       |
| ENSMUSG00000101972 | 19010 Hist1h3i      |
| ENSMUSG00000021319 | 19011 Sfrp4         |
| ENSMUSG00000081739 | 19012 Mdm4-ps       |
| ENSMUSG00000085922 | 19013 Fhad1os2      |
| ENSMUSG00000035129 | 19014 Gm6781        |
| ENSMUSG00000047257 | 19015 Prss45        |
| ENSMUSG00000070000 | 19016 Fcho1         |
| ENSMUSG00000048600 | 19017 Gm5763        |
| ENSMUSG00000082737 | 19018 Gm12026       |
| ENSMUSG00000087530 | 19019 Gm15533       |
| ENSMUSG00000029082 | 19020 Bst1          |
| ENSMUSG00000022512 | 19021 Cldn1         |
| ENSMUSG00000013974 | 19022 Mcemp1        |
| ENSMUSG00000083214 | 19023 Gm11912       |
| ENSMUSG00000035852 | 19024 Misp          |

|                     |                     |
|---------------------|---------------------|
| ENSMUSG00000039304  | 19025 Tnfsf10       |
| ENSMUSG00000028327  | 19026 Stra6l        |
| ENSMUSG00000028836  | 19027 Slc30a2       |
| ENSMUSG00000029193  | 19028 Cckar         |
| ENSMUSG00000081641  | 19029 Gm9439        |
| ENSMUSG00000095105  | 19030 Edaradd       |
| ENSMUSG000000101853 | 19031 Gm28627       |
| ENSMUSG00000082018  | 19032 Gm6322        |
| ENSMUSG00000006538  | 19033 Ihh           |
| ENSMUSG00000087691  | 19034 Gm15674       |
| ENSMUSG00000053588  | 19035 A730061H03Rik |
| ENSMUSG00000052974  | 19036 Cyp2f2        |
| ENSMUSG00000079963  | 19037 Gm7146        |
| ENSMUSG00000051455  | 19038 Gm1564        |
| ENSMUSG000000108659 | 19039 RP23-181P23.4 |
| ENSMUSG000000068302 | 19040 Noto          |
| ENSMUSG00000074881  | 19041 Mageb3        |
| ENSMUSG000000100439 | 19042 Gm28922       |
| ENSMUSG00000020033  | 19043 4930463O16Rik |
| ENSMUSG00000024112  | 19044 Cacna1h       |
| ENSMUSG00000074256  | 19045 Gm10655       |
| ENSMUSG00000086949  | 19046 Gm13066       |
| ENSMUSG00000083287  | 19047 Gm13502       |
| ENSMUSG000000104028 | 19048 Gm5851        |
| ENSMUSG00000028976  | 19049 Slc2a5        |
| ENSMUSG00000070687  | 19050 Htr1d         |
| ENSMUSG00000083768  | 19051 Gm15362       |
| ENSMUSG00000074485  | 19052 Gm7381        |
| ENSMUSG00000081064  | 19053 Gm6071        |
| ENSMUSG000000106486 | 19054 Gm9771        |
| ENSMUSG00000036905  | 19055 C1qb          |
| ENSMUSG00000027790  | 19056 Sis           |
| ENSMUSG00000098231  | 19057 Gm6463        |
| ENSMUSG00000023949  | 19058 Tcte1         |
| ENSMUSG00000029712  | 19059 Actl6b        |
| ENSMUSG00000071089  | 19060 Trim75        |
| ENSMUSG000000103534 | 19061 Gm37835       |
| ENSMUSG00000055134  | 19062 9130017K11Rik |
| ENSMUSG00000005952  | 19063 Trpv1         |
| ENSMUSG000000105295 | 19064 Gm42834       |
| ENSMUSG000000102722 | 19065 Gm37935       |
| ENSMUSG00000074758  | 19066 Gm5535        |

|                     |                      |
|---------------------|----------------------|
| ENSMUSG00000097965  | 19067 Gm5839         |
| ENSMUSG00000092376  | 19068 Gm19203        |
| ENSMUSG00000082765  | 19069 Gm14411        |
| ENSMUSG000000108660 | 19070 RP23-361O12.3  |
| ENSMUSG00000007480  | 19071 Mc5r           |
| ENSMUSG00000041423  | 19072 Paqr6          |
| ENSMUSG00000085051  | 19073 Gm11542        |
| ENSMUSG00000080801  | 19074 Gm13310        |
| ENSMUSG000000102759 | 19075 Gm10463        |
| ENSMUSG00000085315  | 19076 A430018G15Rik  |
| ENSMUSG00000020641  | 19077 Rsad2          |
| ENSMUSG000000107945 | 19078 Rpl7a-ps14     |
| ENSMUSG00000062859  | 19079 Tcp11          |
| ENSMUSG00000094958  | 19080 3110021N24Rik  |
| ENSMUSG00000097533  | 19081 Gm26590        |
| ENSMUSG000000101468 | 19082 Gm7761         |
| ENSMUSG00000038311  | 19083 2410017I17Rik  |
| ENSMUSG00000047259  | 19084 Mc4r           |
| ENSMUSG00000026976  | 19085 Pax8           |
| ENSMUSG000000108161 | 19086 CAAA01219085.1 |
| ENSMUSG00000049999  | 19087 Ppp1r3d        |
| ENSMUSG00000026100  | 19088 Mstn           |
| ENSMUSG00000083171  | 19089 Gm12321        |
| ENSMUSG00000098047  | 19090 Gm18822        |
| ENSMUSG00000053693  | 19091 Mast1          |
| ENSMUSG00000034911  | 19092 Ushbp1         |
| ENSMUSG00000081559  | 19093 Gm12411        |
| ENSMUSG00000084128  | 19094 Esrp2          |
| ENSMUSG00000036040  | 19095 Adamtsl2       |
| ENSMUSG00000083928  | 19096 Gm4991         |
| ENSMUSG00000081023  | 19097 Gm15766        |
| ENSMUSG00000096486  | 19098 Gm5426         |
| ENSMUSG00000035773  | 19099 Kiss1r         |
| ENSMUSG00000079173  | 19100 Zan            |
| ENSMUSG00000082006  | 19101 Gm13649        |
| ENSMUSG000000106791 | 19102 4930553P18Rik  |
| ENSMUSG00000033196  | 19103 Myh2           |
| ENSMUSG00000046805  | 19104 Mpeg1          |
| ENSMUSG00000096999  | 19105 Gm26793        |
| ENSMUSG00000066457  | 19106 S100a11-ps     |
| ENSMUSG00000091442  | 19107 Gm17031        |
| ENSMUSG000000104202 | 19108 Gm8101         |

|                    |                     |
|--------------------|---------------------|
| ENSMUSG00000084845 | 19109 Tmem240       |
| ENSMUSG00000093669 | 19110 Gm9399        |
| ENSMUSG00000060794 | 19111 Tssk5         |
| ENSMUSG00000011263 | 19112 Exoc3l2       |
| ENSMUSG00000084307 | 19113 Gm12151       |
| ENSMUSG00000106935 | 19114 Gm19457       |
| ENSMUSG00000104530 | 19115 Gm6077        |
| ENSMUSG00000106900 | 19116 Gm2040        |
| ENSMUSG00000056632 | 19117 Dsg3          |
| ENSMUSG00000092536 | 19118 Gm20501       |
| ENSMUSG00000009114 | 19119 2610028H24Rik |
| ENSMUSG00000045903 | 19120 Npas4         |
| ENSMUSG00000086576 | 19121 Gm13660       |
| ENSMUSG00000084259 | 19122 Gm12040       |
| ENSMUSG00000062157 | 19123 Ifnlr1        |
| ENSMUSG00000083237 | 19124 Gm11698       |
| ENSMUSG00000103553 | 19125 Gm38218       |
| ENSMUSG00000070337 | 19126 Gpr179        |
| ENSMUSG00000107455 | 19127 RP24-204J8.6  |
| ENSMUSG00000094365 | 19128 Gm21982       |
| ENSMUSG00000104340 | 19129 Gm10522       |
| ENSMUSG00000102075 | 19130 Gm5368        |
| ENSMUSG00000085824 | 19131 Platr9        |
| ENSMUSG00000071506 | 19132 Tmem139       |
| ENSMUSG00000083083 | 19133 Gm15382       |
| ENSMUSG00000078500 | 19134 Gm13235       |
| ENSMUSG00000104780 | 19135 Gm19843       |
| ENSMUSG00000105336 | 19136 AU022133      |
| ENSMUSG00000024734 | 19137 Zp1           |
| ENSMUSG00000071398 | 19138 2410004P03Rik |
| ENSMUSG00000049476 | 19139 1700104B16Rik |
| ENSMUSG00000105928 | 19140 Gm9256        |
| ENSMUSG00000095874 | 19141 Gm9630        |
| ENSMUSG00000071531 | 19142 Gprin2        |
| ENSMUSG00000020591 | 19143 Ntsr2         |
| ENSMUSG00000020411 | 19144 Nipal4        |
| ENSMUSG00000025389 | 19145 Mip           |
| ENSMUSG00000058741 | 19146 Prr19         |
| ENSMUSG00000008193 | 19147 Spib          |
| ENSMUSG00000086993 | 19148 Rsf1os2       |
| ENSMUSG00000032528 | 19149 Vipr1         |
| ENSMUSG00000032999 | 19150 Nlrp4f        |



|                    |                     |
|--------------------|---------------------|
| ENSMUSG00000010760 | 19151 Phlda2        |
| ENSMUSG00000081280 | 19152 Gm9516        |
| ENSMUSG00000085498 | 19153 Gm14023       |
| ENSMUSG00000083154 | 19154 Gm11892       |
| ENSMUSG00000104669 | 19155 Gm43306       |
| ENSMUSG00000020299 | 19156 4930524B15Rik |
| ENSMUSG00000051054 | 19157 1700014D04Rik |
| ENSMUSG00000083103 | 19158 Gm6429        |
| ENSMUSG00000051860 | 19159 Samd7         |
| ENSMUSG00000032110 | 19160 Acrv1         |
| ENSMUSG00000086283 | 19161 2810433D01Rik |
| ENSMUSG00000103792 | 19162 Gm3745        |
| ENSMUSG00000092390 | 19163 Gm20541       |
| ENSMUSG00000004035 | 19164 Gstm7         |
| ENSMUSG00000082467 | 19165 Gm6743        |
| ENSMUSG00000080916 | 19166 Gm12463       |
| ENSMUSG00000082389 | 19167 Mkrn1-ps1     |
| ENSMUSG00000070495 | 19168 Ctcfl         |
| ENSMUSG00000057047 | 19169 1700010B08Rik |
| ENSMUSG00000096158 | 19170 Gm21827       |
| ENSMUSG00000006344 | 19171 Ggt5          |
| ENSMUSG00000028644 | 19172 Ermap         |
| ENSMUSG00000069008 | 19173 Gm5537        |
| ENSMUSG00000099927 | 19174 Gm8226        |
| ENSMUSG00000097724 | 19175 Gm26850       |
| ENSMUSG00000050014 | 19176 Apol10b       |
| ENSMUSG00000026818 | 19177 Cel           |
| ENSMUSG00000083960 | 19178 Gm4918        |
| ENSMUSG00000100202 | 19179 Gm29389       |
| ENSMUSG00000011349 | 19180 Dmrtc2        |
| ENSMUSG00000096658 | 19181 Vmn2r39       |
| ENSMUSG00000039760 | 19182 Il22ra2       |
| ENSMUSG00000055045 | 19183 Gm11190       |
| ENSMUSG00000032671 | 19184 A930018P22Rik |
| ENSMUSG00000027301 | 19185 Oxt           |
| ENSMUSG00000027485 | 19186 Bpifb1        |
| ENSMUSG00000107551 | 19187 RP23-126N22.1 |
| ENSMUSG00000078949 | 19188 R3hdml        |
| ENSMUSG00000030484 | 19189 Lypd5         |
| ENSMUSG00000031710 | 19190 Ucp1          |
| ENSMUSG00000055560 | 19191 Zfp459        |
| ENSMUSG00000099604 | 19192 Gm6651        |

|                    |                     |
|--------------------|---------------------|
| ENSMUSG00000069622 | 19193 Gm10273       |
| ENSMUSG00000097019 | 19194 Gm26663       |
| ENSMUSG00000081593 | 19195 Gm11841       |
| ENSMUSG00000097305 | 19196 Gm17276       |
| ENSMUSG00000049723 | 19197 Mmp12         |
| ENSMUSG00000045008 | 19198 9030612E09Rik |
| ENSMUSG00000070332 | 19199 Trim80        |
| ENSMUSG00000083111 | 19200 Gm14421       |
| ENSMUSG00000070644 | 19201 Etnk2         |
| ENSMUSG00000084073 | 19202 Gm11910       |
| ENSMUSG00000078838 | 19203 Gm17382       |
| ENSMUSG00000105868 | 19204 Gm43766       |
| ENSMUSG00000040740 | 19205 Slc25a34      |
| ENSMUSG00000061633 | 19206 1700029P11Rik |
| ENSMUSG00000082661 | 19207 Gm11590       |
| ENSMUSG00000086577 | 19208 Gm7076        |
| ENSMUSG00000072621 | 19209 Slfn10-ps     |
| ENSMUSG00000022245 | 19210 Skor1         |
| ENSMUSG00000074575 | 19211 Kcng1         |
| ENSMUSG00000105810 | 19212 Gm43435       |
| ENSMUSG00000097208 | 19213 Gm26698       |
| ENSMUSG00000087524 | 19214 Gm14285       |
| ENSMUSG00000027474 | 19215 Ccm2l         |
| ENSMUSG00000049630 | 19216 C1ql3         |
| ENSMUSG00000108540 | 19217 RP23-145H5.2  |
| ENSMUSG00000049606 | 19218 Zfp644        |
| ENSMUSG00000108381 | 19219 RP23-200D13.1 |
| ENSMUSG00000032191 | 19220 Bcl2l10       |
| ENSMUSG00000047938 | 19221 4930483J18Rik |
| ENSMUSG00000050711 | 19222 Scg2          |
| ENSMUSG00000100160 | 19223 Gm28527       |
| ENSMUSG00000097292 | 19224 A230107N01Rik |
| ENSMUSG00000082749 | 19225 Rpl9-ps2      |
| ENSMUSG00000070568 | 19226 1700039E15Rik |
| ENSMUSG00000048473 | 19227 Gm766         |
| ENSMUSG00000098106 | 19228 Gm5350        |
| ENSMUSG00000033777 | 19229 Tlr13         |
| ENSMUSG00000070330 | 19230 Tmem235       |
| ENSMUSG00000036117 | 19231 Il5           |
| ENSMUSG00000099102 | 19232 Gm11983       |
| ENSMUSG00000081373 | 19233 Gm16436       |
| ENSMUSG00000022580 | 19234 Rhpn1         |

|                    |                     |
|--------------------|---------------------|
| ENSMUSG00000036169 | 19235 Sostdc1       |
| ENSMUSG00000079323 | 19236 Gm20661       |
| ENSMUSG00000108258 | 19237 RP24-325P20.7 |
| ENSMUSG00000028626 | 19238 Col9a2        |
| ENSMUSG00000096977 | 19239 Gm10827       |
| ENSMUSG00000093910 | 19240 Zfp853        |
| ENSMUSG00000084115 | 19241 Gm13566       |
| ENSMUSG00000018822 | 19242 Sfrp5         |
| ENSMUSG00000001672 | 19243 Marveld3      |
| ENSMUSG00000108436 | 19244 RP23-137A24.6 |
| ENSMUSG00000066108 | 19245 Muc5b         |
| ENSMUSG00000104116 | 19246 Gm37296       |
| ENSMUSG00000036045 | 19247 Gm12221       |
| ENSMUSG00000095078 | 19248 Gm5866        |
| ENSMUSG00000036067 | 19249 Slc2a6        |
| ENSMUSG00000019230 | 19250 Lhx9          |
| ENSMUSG00000073418 | 19251 C4b           |
| ENSMUSG00000020123 | 19252 Avpr1a        |
| ENSMUSG00000031385 | 19253 Plxnb3        |
| ENSMUSG00000032921 | 19254 Odf4          |
| ENSMUSG00000020871 | 19255 Dlx4          |
| ENSMUSG00000083262 | 19256 Gm14470       |
| ENSMUSG00000103473 | 19257 Gm37696       |
| ENSMUSG00000029500 | 19258 Pgam5         |
| ENSMUSG00000065254 | 19259 Gm23973       |
| ENSMUSG00000025500 | 19260 Lmntd2        |
| ENSMUSG00000083594 | 19261 Gm13722       |
| ENSMUSG00000045521 | 19262 Tssk2         |
| ENSMUSG00000046747 | 19263 Gm9812        |
| ENSMUSG00000081349 | 19264 Gm15041       |
| ENSMUSG00000020684 | 19265 Rasl10b       |
| ENSMUSG00000059027 | 19266 9630013D21Rik |
| ENSMUSG00000108603 | 19267 RP23-92E8.2   |
| ENSMUSG00000029032 | 19268 Arhgef16      |
| ENSMUSG00000098590 | 19269 Gm1113        |
| ENSMUSG00000087357 | 19270 Gm12498       |
| ENSMUSG00000070594 | 19271 Gm4788        |
| ENSMUSG00000072809 | 19272 9330160F10Rik |
| ENSMUSG00000080773 | 19273 Gm12955       |
| ENSMUSG00000082443 | 19274 Gm12604       |
| ENSMUSG00000087164 | 19275 Nr5a1os       |
| ENSMUSG00000084033 | 19276 Gm7645        |

|                     |                     |
|---------------------|---------------------|
| ENSMUSG00000081654  | 19277 Gm5383        |
| ENSMUSG00000074635  | 19278 3110070M22Rik |
| ENSMUSG00000006179  | 19279 Prss16        |
| ENSMUSG00000030219  | 19280 Erp27         |
| ENSMUSG00000100005  | 19281 B130024G19Rik |
| ENSMUSG00000081848  | 19282 Gm14925       |
| ENSMUSG00000098095  | 19283 Gm9274        |
| ENSMUSG00000080842  | 19284 Gm15400       |
| ENSMUSG00000080872  | 19285 Gm11506       |
| ENSMUSG00000108696  | 19286 RP24-144C5.2  |
| ENSMUSG00000100287  | 19287 Gm28068       |
| ENSMUSG00000026574  | 19288 Dpt           |
| ENSMUSG00000039661  | 19289 Dusp26        |
| ENSMUSG00000098079  | 19290 Gm6773        |
| ENSMUSG00000082197  | 19291 Gm8577        |
| ENSMUSG00000105826  | 19292 Gm43819       |
| ENSMUSG00000037872  | 19293 Ackr1         |
| ENSMUSG00000108434  | 19294 RP23-291B1.2  |
| ENSMUSG000000052909 | 19295 Gm9894        |
| ENSMUSG00000039628  | 19296 Hs3st6        |
| ENSMUSG00000107418  | 19297 RP23-198D7.5  |
| ENSMUSG00000081101  | 19298 Gm12024       |
| ENSMUSG00000026307  | 19299 Scly          |
| ENSMUSG00000108575  | 19300 RP23-435E16.4 |
| ENSMUSG00000101828  | 19301 D130051D11Rik |
| ENSMUSG00000083997  | 19302 Gm12920       |
| ENSMUSG00000042250  | 19303 Pglyrp4       |
| ENSMUSG00000063060  | 19304 Sox7          |
| ENSMUSG00000035033  | 19305 Tbr1          |
| ENSMUSG00000021384  | 19306 Susd3         |
| ENSMUSG00000074651  | 19307 Mcidas        |
| ENSMUSG00000097801  | 19308 Gm26777       |
| ENSMUSG00000024987  | 19309 Cyp26a1       |
| ENSMUSG00000066129  | 19310 Kndc1         |
| ENSMUSG00000105905  | 19311 Gm7709        |
| ENSMUSG00000087013  | 19312 2610027K06Rik |
| ENSMUSG00000108240  | 19313 RP23-410I24.3 |
| ENSMUSG00000085016  | 19314 Gm11335       |
| ENSMUSG00000022875  | 19315 Kng1          |
| ENSMUSG00000046275  | 19316 Tusc5         |
| ENSMUSG00000070533  | 19317 Wfdc8         |
| ENSMUSG00000002324  | 19318 Rec8          |

|                     |                     |
|---------------------|---------------------|
| ENSMUSG00000083263  | 19319 Gm14874       |
| ENSMUSG00000105829  | 19320 Gm43669       |
| ENSMUSG00000027913  | 19321 Crct1         |
| ENSMUSG00000017195  | 19322 Zpbp2         |
| ENSMUSG00000050164  | 19323 Mchr1         |
| ENSMUSG00000086010  | 19324 Gm15318       |
| ENSMUSG00000043286  | 19325 Pnpla1        |
| ENSMUSG00000015476  | 19326 Prrt1         |
| ENSMUSG00000079364  | 19327 Gm3558        |
| ENSMUSG00000050121  | 19328 Opalin        |
| ENSMUSG00000099701  | 19329 Gm19136       |
| ENSMUSG00000047643  | 19330 Gm5454        |
| ENSMUSG000000106532 | 19331 Gm5714        |
| ENSMUSG00000052316  | 19332 Lrrc15        |
| ENSMUSG000000100247 | 19333 A530053M12Rik |
| ENSMUSG00000043953  | 19334 Ccrl2         |
| ENSMUSG00000004630  | 19335 Pcp2          |
| ENSMUSG000000105305 | 19336 Gm8872        |
| ENSMUSG000000069273 | 19337 Hist1h3e      |
| ENSMUSG00000037014  | 19338 Sstr4         |
| ENSMUSG00000017007  | 19339 Rbpjl         |
| ENSMUSG00000046345  | 19340 Smco1         |
| ENSMUSG00000031374  | 19341 Zfp92         |
| ENSMUSG000000102891 | 19342 Gm19114       |
| ENSMUSG000000086851 | 19343 A430108G06Rik |
| ENSMUSG00000026344  | 19344 Lypd1         |
| ENSMUSG00000050147  | 19345 F2rl3         |
| ENSMUSG00000050600  | 19346 Zfp831        |
| ENSMUSG000000103415 | 19347 Gm37339       |
| ENSMUSG00000099923  | 19348 1700105P06Rik |
| ENSMUSG00000073804  | 19349 Nps           |
| ENSMUSG000000103304 | 19350 Gm5979        |
| ENSMUSG00000097152  | 19351 Gm26515       |
| ENSMUSG00000055413  | 19352 H2-Q5         |
| ENSMUSG000000101661 | 19353 Gm28392       |
| ENSMUSG00000070803  | 19354 Cited4        |
| ENSMUSG00000097072  | 19355 Foxl2os       |
| ENSMUSG000000106293 | 19356 Gm42476       |
| ENSMUSG00000080298  | 19357 Gm14807       |
| ENSMUSG00000031111  | 19358 Igsf1         |
| ENSMUSG00000061724  | 19359 Gm2423        |
| ENSMUSG00000096446  | 19360 Gm8104        |

|                     |                     |
|---------------------|---------------------|
| ENSMUSG00000040759  | 19361 Cmtm5         |
| ENSMUSG00000054662  | 19362 Ano9          |
| ENSMUSG00000023473  | 19363 Celsr3        |
| ENSMUSG00000085434  | 19364 Gm11725       |
| ENSMUSG00000041578  | 19365 Crx           |
| ENSMUSG00000037583  | 19366 Nr0b2         |
| ENSMUSG00000090451  | 19367 Gm6133        |
| ENSMUSG00000007034  | 19368 Slc44a4       |
| ENSMUSG00000025652  | 19369 Tmem89        |
| ENSMUSG00000027793  | 19370 Ccna1         |
| ENSMUSG00000106707  | 19371 Gm43748       |
| ENSMUSG00000067049  | 19372 Unc93a        |
| ENSMUSG00000097069  | 19373 Gm16998       |
| ENSMUSG00000019905  | 19374 Gprc6a        |
| ENSMUSG00000083684  | 19375 Gm14034       |
| ENSMUSG000000104549 | 19376 Gm43142       |
| ENSMUSG00000069270  | 19377 Hist1h2ac     |
| ENSMUSG00000020638  | 19378 Cmpk2         |
| ENSMUSG000000106982 | 19379 Gm42665       |
| ENSMUSG00000027833  | 19380 Shox2         |
| ENSMUSG00000090753  | 19381 Rpl31-ps4     |
| ENSMUSG00000044276  | 19382 4933427E11Rik |
| ENSMUSG00000081150  | 19383 Gm12684       |
| ENSMUSG00000080223  | 19384 Gm13768       |
| ENSMUSG00000087415  | 19385 Gm14529       |
| ENSMUSG00000037033  | 19386 Clca3b        |
| ENSMUSG00000083303  | 19387 Gm12110       |
| ENSMUSG00000096376  | 19388 Gm14590       |
| ENSMUSG00000057003  | 19389 Myh4          |
| ENSMUSG00000091472  | 19390 Gm3739        |
| ENSMUSG00000019368  | 19391 Sec14l4       |
| ENSMUSG00000082292  | 19392 Gm12250       |
| ENSMUSG00000074812  | 19393 Spdye4c       |
| ENSMUSG000000107319 | 19394 Gm42670       |
| ENSMUSG00000029603  | 19395 Dtx1          |
| ENSMUSG00000082514  | 19396 Gm11452       |
| ENSMUSG000000105820 | 19397 Gm43400       |
| ENSMUSG00000096056  | 19398 Gm21986       |
| ENSMUSG00000079186  | 19399 Gzmc          |
| ENSMUSG00000035498  | 19400 Cdcp1         |
| ENSMUSG00000046204  | 19401 Pnma2         |
| ENSMUSG00000102637  | 19402 Gm8684        |

|                    |                     |
|--------------------|---------------------|
| ENSMUSG00000021922 | 19403 Itih4         |
| ENSMUSG00000106100 | 19404 Gm9314        |
| ENSMUSG00000096438 | 19405 Gapdh-ps15    |
| ENSMUSG00000101462 | 19406 Gm3052        |
| ENSMUSG00000099759 | 19407 1700030C10Rik |
| ENSMUSG00000078554 | 19408 Fam229a       |
| ENSMUSG00000102679 | 19409 Gm20557       |
| ENSMUSG00000085755 | 19410 Gm13496       |
| ENSMUSG00000047976 | 19411 Kcna1         |
| ENSMUSG00000063704 | 19412 Mapk15        |
| ENSMUSG00000081348 | 19413 Gm13878       |
| ENSMUSG00000104091 | 19414 Gm37317       |
| ENSMUSG00000025105 | 19415 Bnc1          |
| ENSMUSG00000039452 | 19416 Snx22         |
| ENSMUSG00000104708 | 19417 Gm42503       |
| ENSMUSG00000102207 | 19418 Gm10344       |
| ENSMUSG00000023443 | 19419 Esx1          |
| ENSMUSG00000016982 | 19420 Pom121l2      |
| ENSMUSG00000022780 | 19421 Mfi2          |
| ENSMUSG00000073538 | 19422 E330020D12Rik |
| ENSMUSG00000082740 | 19423 Gm14127       |
| ENSMUSG00000107167 | 19424 Gm34653       |
| ENSMUSG00000091569 | 19425 Gm8232        |
| ENSMUSG00000059149 | 19426 Mfsd4         |
| ENSMUSG00000029797 | 19427 Sspo          |
| ENSMUSG00000100396 | 19428 Gm29367       |
| ENSMUSG00000042895 | 19429 Abra          |
| ENSMUSG00000044103 | 19430 Il1f9         |
| ENSMUSG00000068859 | 19431 Sp9           |
| ENSMUSG00000069554 | 19432 I830134H01Rik |
| ENSMUSG00000046413 | 19433 Irx3os        |
| ENSMUSG00000042268 | 19434 Slc26a9       |
| ENSMUSG00000103986 | 19435 Gm5539        |
| ENSMUSG00000099913 | 19436 Gm28551       |
| ENSMUSG00000068855 | 19437 Hist2h2ac     |
| ENSMUSG00000028036 | 19438 Ptgfr         |
| ENSMUSG00000053442 | 19439 4930597O21Rik |
| ENSMUSG00000071104 | 19440 Ccdc110       |
| ENSMUSG00000046470 | 19441 Sox18         |
| ENSMUSG00000107936 | 19442 RP23-78J15.5  |
| ENSMUSG00000101612 | 19443 Gm7933        |
| ENSMUSG00000024087 | 19444 Cyp1b1        |

|                    |                     |
|--------------------|---------------------|
| ENSMUSG00000068601 | 19445 Gm10244       |
| ENSMUSG00000081363 | 19446 Gm11500       |
| ENSMUSG00000020573 | 19447 Pik3cg        |
| ENSMUSG00000082461 | 19448 Gm8844        |
| ENSMUSG00000030981 | 19449 Mmp21         |
| ENSMUSG00000061167 | 19450 Rpl15-ps3     |
| ENSMUSG00000043036 | 19451 Ccdc63        |
| ENSMUSG00000067597 | 19452 Dgat2l6       |
| ENSMUSG00000097182 | 19453 A830009L08Rik |
| ENSMUSG00000042788 | 19454 Fam166b       |
| ENSMUSG00000046008 | 19455 Pnlip         |
| ENSMUSG00000062464 | 19456 Cyp4f37       |
| ENSMUSG00000064147 | 19457 Rab44         |
| ENSMUSG00000030117 | 19458 Gdf3          |
| ENSMUSG00000048216 | 19459 Gpr85         |
| ENSMUSG00000097253 | 19460 Gm26770       |
| ENSMUSG00000086172 | 19461 2700068H02Rik |
| ENSMUSG00000052087 | 19462 Rgs14         |
| ENSMUSG00000046031 | 19463 Fam26f        |
| ENSMUSG00000020081 | 19464 Tacr2         |
| ENSMUSG00000038768 | 19465 9130409I23Rik |
| ENSMUSG00000028262 | 19466 Clca3a2       |
| ENSMUSG00000106709 | 19467 Gm42582       |
| ENSMUSG00000103923 | 19468 Gm37896       |
| ENSMUSG00000027434 | 19469 Nkx2-2        |
| ENSMUSG00000020323 | 19470 Prss57        |
| ENSMUSG00000043800 | 19471 Kifc5c-ps     |
| ENSMUSG00000085470 | 19472 1700012C14Rik |
| ENSMUSG00000069540 | 19473 Gm4925        |
| ENSMUSG00000103541 | 19474 Gm37667       |
| ENSMUSG00000041358 | 19475 Nutm1         |
| ENSMUSG00000028738 | 19476 Tas1r2        |
| ENSMUSG00000037953 | 19477 A4gnt         |
| ENSMUSG00000090549 | 19478 Rpl28-ps4     |
| ENSMUSG00000108332 | 19479 RP23-89C10.2  |
| ENSMUSG00000097706 | 19480 E030037K01Rik |
| ENSMUSG00000082500 | 19481 Gm15195       |
| ENSMUSG00000089862 | 19482 Umad1         |
| ENSMUSG00000104548 | 19483 Gm43857       |
| ENSMUSG00000078630 | 19484 Tomt          |
| ENSMUSG00000005251 | 19485 Ripk4         |
| ENSMUSG00000106116 | 19486 Gm18830       |



|                    |                     |
|--------------------|---------------------|
| ENSMUSG00000043664 | 19487 Tmem221       |
| ENSMUSG00000096980 | 19488 Gm26526       |
| ENSMUSG00000081358 | 19489 Gm14746       |
| ENSMUSG00000099662 | 19490 Ppp1r2-ps2    |
| ENSMUSG00000021506 | 19491 Pitx1         |
| ENSMUSG00000082647 | 19492 Gm14056       |
| ENSMUSG00000086628 | 19493 Gm16157       |
| ENSMUSG00000033220 | 19494 Rac2          |
| ENSMUSG00000078894 | 19495 2210418O10Rik |
| ENSMUSG00000044820 | 19496 AY074887      |
| ENSMUSG00000082929 | 19497 Gm6067        |
| ENSMUSG00000075325 | 19498 Gm13582       |
| ENSMUSG00000097357 | 19499 Gm16793       |
| ENSMUSG00000093575 | 19500 Gm20695       |
| ENSMUSG00000082464 | 19501 Rab9b-ps1     |
| ENSMUSG00000009588 | 19502 St6galnac1    |
| ENSMUSG00000105613 | 19503 Gm43684       |
| ENSMUSG00000098059 | 19504 Gm27034       |
| ENSMUSG00000100636 | 19505 Gm3551        |
| ENSMUSG00000081314 | 19506 Gm14132       |
| ENSMUSG00000103609 | 19507 Gm37022       |
| ENSMUSG00000098044 | 19508 Gm9162        |
| ENSMUSG00000100340 | 19509 Gm28923       |
| ENSMUSG00000045065 | 19510 9930022D16Rik |
| ENSMUSG00000041577 | 19511 Prelp         |
| ENSMUSG00000085646 | 19512 Gm11493       |
| ENSMUSG00000019836 | 19513 Amd-ps4       |
| ENSMUSG00000043088 | 19514 Il17re        |
| ENSMUSG00000086358 | 19515 Gm13270       |
| ENSMUSG00000071793 | 19516 2610005L07Rik |
| ENSMUSG00000107841 | 19517 RP23-258N2.3  |
| ENSMUSG00000014609 | 19518 Chrne         |
| ENSMUSG00000051074 | 19519 4930579K19Rik |
| ENSMUSG00000083564 | 19520 Gm11929       |
| ENSMUSG00000090919 | 19521 Pabpc4l       |
| ENSMUSG00000026126 | 19522 Ptpn18        |
| ENSMUSG00000036961 | 19523 Wnt8b         |
| ENSMUSG00000105206 | 19524 Gm4870        |
| ENSMUSG00000074841 | 19525 Cbx3-ps1      |
| ENSMUSG00000023019 | 19526 Gpd1          |
| ENSMUSG00000028544 | 19527 Slc5a9        |
| ENSMUSG00000101777 | 19528 Gm9127        |

|                    |                     |
|--------------------|---------------------|
| ENSMUSG00000097608 | 19529 Gm7952        |
| ENSMUSG00000083903 | 19530 Gm5405        |
| ENSMUSG00000091705 | 19531 H2-Q2         |
| ENSMUSG00000024013 | 19532 Fgd2          |
| ENSMUSG00000087123 | 19533 Gm6706        |
| ENSMUSG00000101923 | 19534 Gm29041       |
| ENSMUSG00000046828 | 19535 Mettl21e      |
| ENSMUSG00000084211 | 19536 Gm11949       |
| ENSMUSG00000102425 | 19537 Gm26616       |
| ENSMUSG00000098528 | 19538 Zfp572        |
| ENSMUSG00000080051 | 19539 Gm14510       |
| ENSMUSG00000050010 | 19540 Shisa3        |
| ENSMUSG00000080997 | 19541 Gm11885       |
| ENSMUSG00000090538 | 19542 Gm4775        |
| ENSMUSG00000083544 | 19543 Oat-rs1       |
| ENSMUSG00000097754 | 19544 Ptgs2os2      |
| ENSMUSG00000034226 | 19545 Rhov          |
| ENSMUSG00000023084 | 19546 Lrrc71        |
| ENSMUSG00000103710 | 19547 D030062O11Rik |
| ENSMUSG00000105004 | 19548 Gm43075       |
| ENSMUSG00000100905 | 19549 Gm28075       |
| ENSMUSG00000073174 | 19550 Gm29254       |
| ENSMUSG00000083223 | 19551 Gm15016       |
| ENSMUSG00000030587 | 19552 2200002D01Rik |
| ENSMUSG00000074250 | 19553 Gm10653       |
| ENSMUSG00000075025 | 19554 Gm10804       |
| ENSMUSG00000009115 | 19555 Spatc1l       |
| ENSMUSG00000052154 | 19556 Gm9870        |
| ENSMUSG00000078139 | 19557 AK157302      |
| ENSMUSG00000049902 | 19558 4921517D22Rik |
| ENSMUSG00000106430 | 19559 Gm42460       |
| ENSMUSG00000099375 | 19560 Gm28187       |
| ENSMUSG00000052819 | 19561 Best2         |
| ENSMUSG00000051504 | 19562 Siglech       |
| ENSMUSG00000082285 | 19563 Gm14069       |
| ENSMUSG00000009281 | 19564 Rarres2       |
| ENSMUSG00000083180 | 19565 Gm15007       |
| ENSMUSG00000099732 | 19566 Gm17752       |
| ENSMUSG00000094626 | 19567 Cocr6         |
| ENSMUSG00000087528 | 19568 9830144P21Rik |
| ENSMUSG00000085111 | 19569 Ascl4         |
| ENSMUSG00000081205 | 19570 Gm5940        |

|                    |                     |
|--------------------|---------------------|
| ENSMUSG00000048763 | 19571 Hoxb3         |
| ENSMUSG00000103042 | 19572 Gm2719        |
| ENSMUSG00000097254 | 19573 C430042M11Rik |
| ENSMUSG00000103168 | 19574 Gm30948       |
| ENSMUSG00000097561 | 19575 4632411P08Rik |
| ENSMUSG00000082696 | 19576 Gm15040       |
| ENSMUSG00000086390 | 19577 1810019D21Rik |
| ENSMUSG00000054676 | 19578 1600014C10Rik |
| ENSMUSG00000039639 | 19579 Kcne1         |
| ENSMUSG00000085794 | 19580 Vax2os        |
| ENSMUSG00000096968 | 19581 Gm26620       |
| ENSMUSG00000106140 | 19582 Gm43204       |
| ENSMUSG00000073568 | 19583 Arl14epl      |
| ENSMUSG00000026928 | 19584 Card9         |
| ENSMUSG00000030247 | 19585 Kcnj8         |
| ENSMUSG00000096940 | 19586 Gm4755        |
| ENSMUSG00000035560 | 19587 Wdr20rt       |
| ENSMUSG00000090631 | 19588 Olfr456       |
| ENSMUSG00000060735 | 19589 Rxfp3         |
| ENSMUSG00000102404 | 19590 5530400K19Rik |
| ENSMUSG00000032101 | 19591 Ddx25         |
| ENSMUSG00000047298 | 19592 Kcnv2         |
| ENSMUSG00000078903 | 19593 Gm14391       |
| ENSMUSG00000046372 | 19594 Gm5590        |
| ENSMUSG00000107497 | 19595 RP23-441J16.4 |
| ENSMUSG00000062687 | 19596 Cks1brt       |
| ENSMUSG00000105666 | 19597 Gm18711       |
| ENSMUSG00000008843 | 19598 Cldn13        |
| ENSMUSG00000099936 | 19599 Gm28867       |
| ENSMUSG00000030364 | 19600 Clec2h        |
| ENSMUSG00000107479 | 19601 RP23-111G16.8 |
| ENSMUSG00000064140 | 19602 Trim38        |
| ENSMUSG00000087166 | 19603 L1td1         |
| ENSMUSG00000105813 | 19604 Gm42928       |
| ENSMUSG00000091462 | 19605 Gm17084       |
| ENSMUSG00000018752 | 19606 Tnfsfm13      |
| ENSMUSG00000041202 | 19607 Pla2g2d       |
| ENSMUSG00000068452 | 19608 Duox2         |
| ENSMUSG00000025128 | 19609 Bhlhe22       |
| ENSMUSG00000082225 | 19610 Gm13728       |
| ENSMUSG00000097022 | 19611 BC001981      |
| ENSMUSG00000097128 | 19612 Gm26884       |

|                    |                     |
|--------------------|---------------------|
| ENSMUSG00000071890 | 19613 Mroh9         |
| ENSMUSG00000025127 | 19614 Gcgr          |
| ENSMUSG00000092178 | 19615 Gm3912        |
| ENSMUSG00000024440 | 19616 Pcdh12        |
| ENSMUSG00000022445 | 19617 Cyp2d26       |
| ENSMUSG00000086652 | 19618 Gm14029       |
| ENSMUSG00000067872 | 19619 Ccdc87        |
| ENSMUSG00000084173 | 19620 Gm5287        |
| ENSMUSG00000097675 | 19621 1700101I11Rik |
| ENSMUSG00000029878 | 19622 Dbpht2        |
| ENSMUSG00000082632 | 19623 Gm13365       |
| ENSMUSG00000071341 | 19624 Egr4          |
| ENSMUSG00000000889 | 19625 Dbh           |
| ENSMUSG00000015947 | 19626 Fcgr1         |
| ENSMUSG00000081843 | 19627 Gm7851        |
| ENSMUSG00000056043 | 19628 Rgs9bp        |
| ENSMUSG00000045929 | 19629 Gm20715       |
| ENSMUSG00000082679 | 19630 Gm13469       |
| ENSMUSG00000020396 | 19631 Nefh          |
| ENSMUSG00000030800 | 19632 Prss8         |
| ENSMUSG00000082797 | 19633 Gm12015       |
| ENSMUSG00000029707 | 19634 Fscn3         |
| ENSMUSG00000075304 | 19635 Sp5           |
| ENSMUSG00000032318 | 19636 Isl2          |
| ENSMUSG00000055323 | 19637 Gm9967        |
| ENSMUSG00000106824 | 19638 Gm7697        |
| ENSMUSG00000081058 | 19639 Hist2h3c2     |
| ENSMUSG00000045075 | 19640 Gm9796        |
| ENSMUSG00000099946 | 19641 Gm9496        |
| ENSMUSG00000074224 | 19642 4932431P20Rik |
| ENSMUSG00000107612 | 19643 RP23-205A7.1  |
| ENSMUSG00000014852 | 19644 Adamts13      |
| ENSMUSG00000039095 | 19645 En2           |
| ENSMUSG00000107045 | 19646 Gm43636       |
| ENSMUSG00000095827 | 19647 Gm5283        |
| ENSMUSG00000050818 | 19648 Olfr330       |
| ENSMUSG00000032473 | 19649 Cldn18        |
| ENSMUSG00000104686 | 19650 Gm42815       |
| ENSMUSG00000096923 | 19651 A730071L15Rik |
| ENSMUSG00000073980 | 19652 Gm9574        |
| ENSMUSG00000108162 | 19653 RP23-103G18.8 |
| ENSMUSG00000056032 | 19654 BC018473      |

|                     |                     |
|---------------------|---------------------|
| ENSMUSG00000045589  | 19655 Frrs1l        |
| ENSMUSG00000071203  | 19656 Naip5         |
| ENSMUSG00000082453  | 19657 Gm11502       |
| ENSMUSG000000103312 | 19658 Gm6677        |
| ENSMUSG000000104694 | 19659 Gm43797       |
| ENSMUSG000000103261 | 19660 Gm36981       |
| ENSMUSG000000098171 | 19661 Gm9621        |
| ENSMUSG000000079164 | 19662 Tlr5          |
| ENSMUSG000000029875 | 19663 Ccdc184       |
| ENSMUSG000000063623 | 19664 C230062I16Rik |
| ENSMUSG000000010080 | 19665 Epn3          |
| ENSMUSG000000082851 | 19666 Gm11931       |
| ENSMUSG000000098229 | 19667 Gm7719        |
| ENSMUSG000000107335 | 19668 Gm43372       |
| ENSMUSG000000085006 | 19669 BC021767      |
| ENSMUSG000000106031 | 19670 Gm8848        |
| ENSMUSG000000102137 | 19671 Rpl28-ps2     |
| ENSMUSG000000105602 | 19672 Gm10636       |
| ENSMUSG000000098054 | 19673 Gm8192        |
| ENSMUSG000000096619 | 19674 Gm2035        |
| ENSMUSG000000044172 | 19675 Ptx4          |
| ENSMUSG000000049100 | 19676 Pcdh10        |
| ENSMUSG000000098216 | 19677 Gm5181        |
| ENSMUSG000000100963 | 19678 Gm28372       |
| ENSMUSG000000107203 | 19679 Gm7542        |
| ENSMUSG000000087050 | 19680 Dhrrs13os     |
| ENSMUSG000000104643 | 19681 Gm8862        |
| ENSMUSG000000075029 | 19682 4930558J22Rik |
| ENSMUSG000000081965 | 19683 Gm11620       |
| ENSMUSG000000035228 | 19684 Ccdc106       |
| ENSMUSG000000064330 | 19685 Pde6h         |
| ENSMUSG000000085534 | 19686 Gm2117        |
| ENSMUSG000000059887 | 19687 Olfr1507      |
| ENSMUSG000000080788 | 19688 Gm7841        |
| ENSMUSG000000036687 | 19689 Tmem184a      |
| ENSMUSG000000099795 | 19690 Gm29492       |
| ENSMUSG000000071748 | 19691 Gm14698       |
| ENSMUSG000000010592 | 19692 Dazl          |
| ENSMUSG000000041479 | 19693 Syt15         |
| ENSMUSG000000044279 | 19694 Crb3          |
| ENSMUSG000000064247 | 19695 Plcxd1        |
| ENSMUSG000000017309 | 19696 Cd300lg       |

|                    |                     |
|--------------------|---------------------|
| ENSMUSG00000034570 | 19697 Inpp5j        |
| ENSMUSG00000104793 | 19698 Gm43756       |
| ENSMUSG00000100595 | 19699 Gm19087       |
| ENSMUSG00000024184 | 19700 Pdia2         |
| ENSMUSG00000084803 | 19701 5830444B04Rik |
| ENSMUSG00000106042 | 19702 Gm42861       |
| ENSMUSG00000081674 | 19703 Gm6184        |
| ENSMUSG00000032591 | 19704 Mst1          |
| ENSMUSG00000020090 | 19705 Npffr1        |
| ENSMUSG00000084060 | 19706 Gm16412       |
| ENSMUSG00000084320 | 19707 Gm14125       |
| ENSMUSG00000105173 | 19708 Gm5715        |
| ENSMUSG00000103695 | 19709 A830029E22Rik |
| ENSMUSG00000046826 | 19710 Fam187b       |
| ENSMUSG00000027318 | 19711 Adam33        |
| ENSMUSG00000036913 | 19712 Trim67        |
| ENSMUSG00000081793 | 19713 5730416F02Rik |
| ENSMUSG00000045350 | 19714 Fam186a       |
| ENSMUSG00000108082 | 19715 RP23-12A18.6  |
| ENSMUSG00000027399 | 19716 Il1a          |
| ENSMUSG00000104959 | 19717 Gm18131       |
| ENSMUSG00000028978 | 19718 Nos3          |
| ENSMUSG00000033717 | 19719 Adra2a        |
| ENSMUSG00000097099 | 19720 Gm9917        |
| ENSMUSG00000100417 | 19721 Gm28578       |
| ENSMUSG00000070847 | 19722 Vmn2r30       |
| ENSMUSG00000108197 | 19723 RP23-20K24.10 |
| ENSMUSG00000095661 | 19724 Gm8935        |
| ENSMUSG00000097939 | 19725 Gm8601        |
| ENSMUSG00000098011 | 19726 Gm21232       |
| ENSMUSG00000040552 | 19727 C3ar1         |
| ENSMUSG00000019932 | 19728 Kera          |
| ENSMUSG00000070388 | 19729 Fbxo39        |
| ENSMUSG00000044139 | 19730 Prss53        |
| ENSMUSG00000067242 | 19731 Lgi1          |
| ENSMUSG00000038026 | 19732 Kcnj9         |
| ENSMUSG00000097957 | 19733 Gm8993        |
| ENSMUSG00000102189 | 19734 Gm37194       |
| ENSMUSG00000021228 | 19735 Acot3         |
| ENSMUSG00000029335 | 19736 Bmp3          |
| ENSMUSG00000108048 | 19737 RP23-318B18.2 |
| ENSMUSG00000038201 | 19738 Kcna7         |

|                    |                     |
|--------------------|---------------------|
| ENSMUSG00000108009 | 19739 RP23-234C22.2 |
| ENSMUSG00000066755 | 19740 Tnfsf18       |
| ENSMUSG00000045259 | 19741 Klhdc9        |
| ENSMUSG00000053024 | 19742 Cntn2         |
| ENSMUSG00000082371 | 19743 Gm3712        |
| ENSMUSG00000030546 | 19744 Plin1         |
| ENSMUSG00000102439 | 19745 Flg           |
| ENSMUSG00000093406 | 19746 Rpl48-ps1     |
| ENSMUSG00000108357 | 19747 RP23-421P23.2 |
| ENSMUSG00000080942 | 19748 Zfp36l1-ps    |
| ENSMUSG00000108595 | 19749 RP23-190H11.8 |
| ENSMUSG00000049001 | 19750 Ndnf          |
| ENSMUSG00000056130 | 19751 Ticam2        |
| ENSMUSG00000101641 | 19752 Gm29560       |
| ENSMUSG00000081026 | 19753 Gm11855       |
| ENSMUSG00000094841 | 19754 Gm10610       |
| ENSMUSG00000047990 | 19755 C2cd4a        |
| ENSMUSG00000105204 | 19756 Gm43738       |
| ENSMUSG00000019359 | 19757 Gdpd2         |
| ENSMUSG00000092278 | 19758 Gm8752        |
| ENSMUSG00000074912 | 19759 Gm14207       |
| ENSMUSG00000072244 | 19760 Trim6         |
| ENSMUSG00000082418 | 19761 Gm13126       |
| ENSMUSG00000072381 | 19762 Gm10355       |
| ENSMUSG00000045930 | 19763 Clec14a       |
| ENSMUSG00000040140 | 19764 Tdrd6         |
| ENSMUSG00000095265 | 19765 Gm16368       |
| ENSMUSG00000108279 | 19766 RP23-248L4.5  |
| ENSMUSG00000091007 | 19767 D630036H23Rik |
| ENSMUSG00000028859 | 19768 Csf3r         |
| ENSMUSG00000103411 | 19769 Gm18300       |
| ENSMUSG00000025482 | 19770 Odf3          |
| ENSMUSG00000104379 | 19771 Gm37509       |
| ENSMUSG00000087221 | 19772 BC037032      |
| ENSMUSG00000106062 | 19773 Gm43820       |
| ENSMUSG00000082852 | 19774 Gm12021       |
| ENSMUSG00000103492 | 19775 Gm37412       |
| ENSMUSG00000095914 | 19776 Vmn2r48       |
| ENSMUSG00000086181 | 19777 C230034O21Rik |
| ENSMUSG00000090235 | 19778 Gm16244       |
| ENSMUSG00000098010 | 19779 Gm21542       |
| ENSMUSG00000044816 | 19780 D630023F18Rik |

|                     |                     |
|---------------------|---------------------|
| ENSMUSG00000063672  | 19781 Nkx6-3        |
| ENSMUSG00000053846  | 19782 Lipg          |
| ENSMUSG00000082581  | 19783 Gm13761       |
| ENSMUSG00000026602  | 19784 Nphs2         |
| ENSMUSG00000047562  | 19785 Mmp10         |
| ENSMUSG00000000731  | 19786 Aire          |
| ENSMUSG000000103856 | 19787 Gm2474        |
| ENSMUSG00000099470  | 19788 Gm29340       |
| ENSMUSG000000108236 | 19789 RP24-83C9.5   |
| ENSMUSG000000052951 | 19790 C130021I20Rik |
| ENSMUSG00000041750  | 19791 Cd1d2         |
| ENSMUSG00000029275  | 19792 Gfi1          |
| ENSMUSG00000020890  | 19793 Gucy2e        |
| ENSMUSG000000107440 | 19794 RP23-64I9.2   |
| ENSMUSG00000028222  | 19795 Calb1         |
| ENSMUSG000000035277 | 19796 Arx           |
| ENSMUSG000000057609 | 19797 Lce1a1        |
| ENSMUSG000000085453 | 19798 Gm12018       |
| ENSMUSG000000025902 | 19799 Sox17         |
| ENSMUSG000000084404 | 19800 Gm12513       |
| ENSMUSG000000020310 | 19801 Madcam1       |
| ENSMUSG000000055976 | 19802 Cldn23        |
| ENSMUSG000000029054 | 19803 Gabrd         |
| ENSMUSG000000056380 | 19804 Gpr50         |
| ENSMUSG000000053291 | 19805 Rab4b         |
| ENSMUSG000000108705 | 19806 RP23-312I2.7  |
| ENSMUSG000000087147 | 19807 Gm14228       |
| ENSMUSG000000027314 | 19808 Dll4          |
| ENSMUSG000000104684 | 19809 5430427N15Rik |
| ENSMUSG000000098225 | 19810 Gm9556        |
| ENSMUSG000000097572 | 19811 Gm26797       |
| ENSMUSG000000032773 | 19812 Chrm1         |
| ENSMUSG000000028717 | 19813 Tal1          |
| ENSMUSG000000067279 | 19814 Ppp1r3c       |
| ENSMUSG000000091378 | 19815 Gm4219        |
| ENSMUSG000000054247 | 19816 Gm9939        |
| ENSMUSG000000102033 | 19817 Gm28263       |
| ENSMUSG000000097443 | 19818 Gm17529       |
| ENSMUSG000000101429 | 19819 BC055402      |
| ENSMUSG000000048355 | 19820 Arxes1        |
| ENSMUSG000000106189 | 19821 Gm42933       |
| ENSMUSG000000025129 | 19822 Ppp1r27       |



|                    |                     |
|--------------------|---------------------|
| ENSMUSG00000026614 | 19823 Slc30a10      |
| ENSMUSG00000098093 | 19824 Gm8707        |
| ENSMUSG00000082563 | 19825 Gm15026       |
| ENSMUSG00000078253 | 19826 Krtap16-1     |
| ENSMUSG00000100252 | 19827 Mir124-2hg    |
| ENSMUSG00000093800 | 19828 Gm20796       |
| ENSMUSG00000048485 | 19829 Zbtb8b        |
| ENSMUSG00000006642 | 19830 Tcf23         |
| ENSMUSG00000101144 | 19831 Gm29054       |
| ENSMUSG00000097244 | 19832 Gm7928        |
| ENSMUSG00000089671 | 19833 Gm16537       |
| ENSMUSG00000097209 | 19834 AU022754      |
| ENSMUSG00000084348 | 19835 Gm14608       |
| ENSMUSG00000103662 | 19836 Gm34294       |
| ENSMUSG00000084844 | 19837 Hoxb3os       |
| ENSMUSG00000082847 | 19838 Gm5759        |
| ENSMUSG00000007033 | 19839 Hspa1l        |
| ENSMUSG00000098165 | 19840 Gm26977       |
| ENSMUSG00000082736 | 19841 Gm5381        |
| ENSMUSG00000047508 | 19842 Mbd3l2        |
| ENSMUSG00000103958 | 19843 Gm8023        |
| ENSMUSG00000082342 | 19844 Gm5395        |
| ENSMUSG00000104226 | 19845 Gm7470        |
| ENSMUSG00000080899 | 19846 Gm9109        |
| ENSMUSG00000033520 | 19847 Idi2          |
| ENSMUSG00000031241 | 19848 Tbx22         |
| ENSMUSG00000058057 | 19849 Mettl7a3      |
| ENSMUSG00000040478 | 19850 Prdm13        |
| ENSMUSG00000105512 | 19851 Gm43714       |
| ENSMUSG00000102652 | 19852 Gm37078       |
| ENSMUSG00000062515 | 19853 Fabp4         |
| ENSMUSG00000049008 | 19854 BB014433      |
| ENSMUSG00000098237 | 19855 Gm7577        |
| ENSMUSG00000035403 | 19856 Crb2          |
| ENSMUSG00000031665 | 19857 Sall1         |
| ENSMUSG00000055826 | 19858 Tescl         |
| ENSMUSG00000085696 | 19859 Hoxaas3       |
| ENSMUSG00000099958 | 19860 1700010B13Rik |
| ENSMUSG00000084998 | 19861 Gm16279       |
| ENSMUSG00000089661 | 19862 Mia           |
| ENSMUSG00000027001 | 19863 Dusp19        |
| ENSMUSG00000028635 | 19864 Edn2          |

|                    |                     |
|--------------------|---------------------|
| ENSMUSG00000094606 | 19865 Vmn2r50       |
| ENSMUSG00000047636 | 19866 Cdcp2         |
| ENSMUSG00000060240 | 19867 Cend1         |
| ENSMUSG00000086775 | 19868 Snhg7os       |
| ENSMUSG00000081013 | 19869 Gm14497       |
| ENSMUSG00000038692 | 19870 Hoxb4         |
| ENSMUSG00000097627 | 19871 4930519A11Rik |
| ENSMUSG00000080888 | 19872 Gm14387       |
| ENSMUSG00000083062 | 19873 Gm14980       |
| ENSMUSG00000044903 | 19874 Psg22         |
| ENSMUSG00000108026 | 19875 RP24-174O2.8  |
| ENSMUSG00000064225 | 19876 Paqr9         |
| ENSMUSG00000104597 | 19877 B230334C09Rik |
| ENSMUSG00000070425 | 19878 Xntrpc        |
| ENSMUSG00000043085 | 19879 Tmem82        |
| ENSMUSG00000078350 | 19880 Smim1         |
| ENSMUSG00000102833 | 19881 Gm9694        |
| ENSMUSG00000097460 | 19882 Gm26734       |
| ENSMUSG00000082332 | 19883 Gm13384       |
| ENSMUSG00000045746 | 19884 B230317F23Rik |
| ENSMUSG00000097612 | 19885 Gm26509       |
| ENSMUSG00000085115 | 19886 Gm11197       |
| ENSMUSG00000070465 | 19887 Gm9696        |
| ENSMUSG00000087474 | 19888 Gm12100       |
| ENSMUSG00000015599 | 19889 Ttbk1         |
| ENSMUSG00000086847 | 19890 Tbx3os2       |
| ENSMUSG00000083279 | 19891 Pex13-ps      |
| ENSMUSG00000099562 | 19892 Gm19027       |
| ENSMUSG00000085565 | 19893 Gm15721       |
| ENSMUSG00000093445 | 19894 Lrch4         |
| ENSMUSG00000084358 | 19895 Gm11352       |
| ENSMUSG00000073761 | 19896 4933427I04Rik |
| ENSMUSG00000021904 | 19897 Sema3g        |
| ENSMUSG00000082388 | 19898 Gm12692       |
| ENSMUSG00000099366 | 19899 Gm2497        |
| ENSMUSG00000038997 | 19900 Asb17         |
| ENSMUSG00000102731 | 19901 Gm38261       |
| ENSMUSG00000030589 | 19902 Rasgrp4       |
| ENSMUSG00000084253 | 19903 Gm11256       |
| ENSMUSG00000053749 | 19904 Gm9920        |
| ENSMUSG00000045518 | 19905 Onecut3       |
| ENSMUSG00000082082 | 19906 Gm13230       |

|                     |                      |
|---------------------|----------------------|
| ENSMUSG00000005892  | 19907 Trh            |
| ENSMUSG00000009580  | 19908 Odam           |
| ENSMUSG000000087612 | 19909 A230005M16Rik  |
| ENSMUSG000000085105 | 19910 Gm12758        |
| ENSMUSG00000103556  | 19911 Gm38215        |
| ENSMUSG00000098434  | 19912 2010110E17Rik  |
| ENSMUSG00000000386  | 19913 Mx1            |
| ENSMUSG00000104265  | 19914 Gm8869         |
| ENSMUSG00000073436  | 19915 Eme2           |
| ENSMUSG000000081132 | 19916 Gm13744        |
| ENSMUSG00000100093  | 19917 Gm29649        |
| ENSMUSG00000086127  | 19918 Gm11934        |
| ENSMUSG000000044359 | 19919 P2ry4          |
| ENSMUSG00000034156  | 19920 Bzrap1         |
| ENSMUSG00000106402  | 19921 Gm17824        |
| ENSMUSG00000102632  | 19922 Gm37786        |
| ENSMUSG00000097076  | 19923 Platr7         |
| ENSMUSG00000071636  | 19924 Rimbp3         |
| ENSMUSG00000099032  | 19925 Tcf24          |
| ENSMUSG00000106943  | 19926 Snora26        |
| ENSMUSG00000010044  | 19927 Zmynd10        |
| ENSMUSG000000021081 | 19928 Serpina1f      |
| ENSMUSG00000054418  | 19929 2900041M22Rik  |
| ENSMUSG00000099877  | 19930 Pinc           |
| ENSMUSG00000006056  | 19931 Calcoco2       |
| ENSMUSG00000100619  | 19932 Gm8446         |
| ENSMUSG00000103725  | 19933 Gm7103         |
| ENSMUSG00000080760  | 19934 Gm7571         |
| ENSMUSG00000032940  | 19935 Rbm11          |
| ENSMUSG00000044827  | 19936 Tlr1           |
| ENSMUSG00000074361  | 19937 C5ar2          |
| ENSMUSG00000034227  | 19938 Foxj1          |
| ENSMUSG00000087246  | 19939 Gm13346        |
| ENSMUSG00000101399  | 19940 Gm28961        |
| ENSMUSG00000089940  | 19941 Gm4117         |
| ENSMUSG00000104736  | 19942 Gm43146        |
| ENSMUSG00000046070  | 19943 Igfals         |
| ENSMUSG00000032596  | 19944 Uba7           |
| ENSMUSG00000107459  | 19945 RP24-289M9.1   |
| ENSMUSG00000031506  | 19946 Ptpn7          |
| ENSMUSG00000093673  | 19947 Gm20644        |
| ENSMUSG00000108129  | 19948 RP23-402K14.12 |

|                    |                     |
|--------------------|---------------------|
| ENSMUSG00000096921 | 19949 Gm26822       |
| ENSMUSG00000105040 | 19950 Ube2l3-ps1    |
| ENSMUSG00000075334 | 19951 Rprm          |
| ENSMUSG00000094649 | 19952 Gm7102        |
| ENSMUSG00000101940 | 19953 Akp-ps1       |
| ENSMUSG00000045794 | 19954 Lkaaeear1     |
| ENSMUSG00000106604 | 19955 Gm42535       |
| ENSMUSG00000028386 | 19956 Slc46a2       |
| ENSMUSG00000033080 | 19957 Vsx1          |
| ENSMUSG00000085530 | 19958 Gm13901       |
| ENSMUSG00000052301 | 19959 Doc2a         |
| ENSMUSG00000106967 | 19960 Gm42477       |
| ENSMUSG00000090379 | 19961 Gm8229        |
| ENSMUSG00000036699 | 19962 Zcchc12       |
| ENSMUSG00000085320 | 19963 Gm11548       |
| ENSMUSG00000105625 | 19964 Gm31230       |
| ENSMUSG00000083191 | 19965 Gm15571       |
| ENSMUSG00000100813 | 19966 Gm28874       |
| ENSMUSG00000042436 | 19967 Mfap4         |
| ENSMUSG00000081719 | 19968 Gm13726       |
| ENSMUSG00000107894 | 19969 RP23-214L4.7  |
| ENSMUSG00000038567 | 19970 Cyp24a1       |
| ENSMUSG00000107930 | 19971 RP23-444P22.1 |
| ENSMUSG00000084038 | 19972 Gm11295       |
| ENSMUSG00000082117 | 19973 Gm4994        |
| ENSMUSG00000086496 | 19974 Gm14204       |
| ENSMUSG00000086266 | 19975 Igf2os        |
| ENSMUSG00000046110 | 19976 Serinc4       |
| ENSMUSG00000082301 | 19977 Gm14032       |
| ENSMUSG00000107325 | 19978 Gm43425       |
| ENSMUSG00000093985 | 19979 Gm10406       |
| ENSMUSG00000046793 | 19980 Gpr61         |
| ENSMUSG00000081250 | 19981 Gm15554       |
| ENSMUSG00000036412 | 19982 Arsi          |
| ENSMUSG00000083518 | 19983 Gm9429        |
| ENSMUSG00000094935 | 19984 Gm9726        |
| ENSMUSG00000083224 | 19985 Gm11255       |
| ENSMUSG00000097525 | 19986 Platr31       |
| ENSMUSG00000082155 | 19987 Gm7164        |
| ENSMUSG00000044338 | 19988 Aplnr         |
| ENSMUSG00000096947 | 19989 Gm26723       |
| ENSMUSG00000098167 | 19990 Gm18848       |

|                    |                     |
|--------------------|---------------------|
| ENSMUSG00000108596 | 19991 Itgam         |
| ENSMUSG00000021469 | 19992 Msx2          |
| ENSMUSG00000084028 | 19993 Gm13983       |
| ENSMUSG00000064272 | 19994 Gpbar1        |
| ENSMUSG00000060969 | 19995 Irx1          |
| ENSMUSG00000038917 | 19996 3930402G23Rik |
| ENSMUSG00000098173 | 19997 Gm26923       |
| ENSMUSG00000066178 | 19998 6030445D17Rik |
| ENSMUSG00000102297 | 19999 5730585A16Rik |
| ENSMUSG00000086118 | 20000 Gm14169       |
| ENSMUSG00000107487 | 20001 RP23-78J15.6  |
| ENSMUSG00000102269 | 20002 Gm7357        |
| ENSMUSG00000037974 | 20003 Muc5ac        |
| ENSMUSG00000058873 | 20004 Gm5582        |
| ENSMUSG00000086001 | 20005 Gm13448       |
| ENSMUSG00000085564 | 20006 Gm12198       |
| ENSMUSG00000048230 | 20007 Fbxo43        |
| ENSMUSG00000040310 | 20008 Alx4          |
| ENSMUSG00000047347 | 20009 Tdg-ps        |
| ENSMUSG00000020609 | 20010 Apob          |
| ENSMUSG00000097947 | 20011 Gm26970       |
| ENSMUSG00000021356 | 20012 Irf4          |
| ENSMUSG00000044724 | 20013 Gpr152        |
| ENSMUSG00000083075 | 20014 Gm11980       |
| ENSMUSG00000081842 | 20015 Rap1a-ps2     |
| ENSMUSG00000104150 | 20016 Gm33989       |
| ENSMUSG00000083470 | 20017 Nsa2-ps2      |
| ENSMUSG00000038721 | 20018 Hoxb7         |
| ENSMUSG00000104182 | 20019 Gm21362       |
| ENSMUSG00000081898 | 20020 Gm5754        |
| ENSMUSG00000104109 | 20021 Gm30292       |
| ENSMUSG00000071235 | 20022 Vrtn          |
| ENSMUSG00000101499 | 20023 Vmn2r-ps139   |
| ENSMUSG00000081777 | 20024 Gm14159       |
| ENSMUSG00000108249 | 20025 RP23-170M6.3  |
| ENSMUSG00000082271 | 20026 Gm12217       |
| ENSMUSG00000102798 | 20027 Gm37271       |
| ENSMUSG00000073608 | 20028 Gm6086        |
| ENSMUSG00000083145 | 20029 Gm12579       |
| ENSMUSG00000079440 | 20030 Alpi          |
| ENSMUSG00000044055 | 20031 Otos          |
| ENSMUSG00000106314 | 20032 Gm9632        |

|                    |                     |
|--------------------|---------------------|
| ENSMUSG00000041695 | 20033 Kcnj2         |
| ENSMUSG00000105383 | 20034 Gm42641       |
| ENSMUSG00000055235 | 20035 Wdr86         |
| ENSMUSG00000030873 | 20036 Scnn1b        |
| ENSMUSG00000102735 | 20037 Gm7369        |
| ENSMUSG00000101605 | 20038 Ace3          |
| ENSMUSG00000079654 | 20039 Prrt4         |
| ENSMUSG00000015950 | 20040 Ncf1          |
| ENSMUSG00000083817 | 20041 Gm14400       |
| ENSMUSG00000071750 | 20042 Gm7713        |
| ENSMUSG00000075553 | 20043 Gm5464        |
| ENSMUSG00000085445 | 20044 Gm16348       |
| ENSMUSG00000100987 | 20045 Gm1627        |
| ENSMUSG00000035201 | 20046 B020004J07Rik |
| ENSMUSG00000084793 | 20047 Gm2568        |
| ENSMUSG00000074847 | 20048 Gm10775       |
| ENSMUSG00000038077 | 20049 Kcna6         |
| ENSMUSG00000094941 | 20050 Gm15093       |
| ENSMUSG00000040380 | 20051 Cbln3         |
| ENSMUSG00000103900 | 20052 Gm37500       |
| ENSMUSG00000082495 | 20053 Gm12570       |
| ENSMUSG00000098132 | 20054 Rassf10       |
| ENSMUSG00000108744 | 20055 RP24-426A19.1 |
| ENSMUSG00000098085 | 20056 Gm8919        |
| ENSMUSG00000093560 | 20057 Gm6695        |
| ENSMUSG00000101935 | 20058 Gm17748       |
| ENSMUSG00000104850 | 20059 Gm42901       |
| ENSMUSG00000054850 | 20060 Smim10l2a     |
| ENSMUSG00000090207 | 20061 4930524O07Rik |
| ENSMUSG00000091993 | 20062 B930036N10Rik |
| ENSMUSG00000027322 | 20063 Siglec1       |
| ENSMUSG00000048142 | 20064 Nat8l         |
| ENSMUSG00000103475 | 20065 Gm37697       |
| ENSMUSG00000101555 | 20066 Gm28731       |
| ENSMUSG00000081171 | 20067 Gm7485        |
| ENSMUSG00000097949 | 20068 Gm5354        |
| ENSMUSG00000039798 | 20069 2600006K01Rik |
| ENSMUSG00000038805 | 20070 Six3          |
| ENSMUSG00000050505 | 20071 Pcdh20        |
| ENSMUSG00000104087 | 20072 Gm38277       |
| ENSMUSG00000087037 | 20073 4930432L08Rik |
| ENSMUSG00000068303 | 20074 Spr-ps1       |

|                    |                     |
|--------------------|---------------------|
| ENSMUSG00000105609 | 20075 Gm42501       |
| ENSMUSG00000105657 | 20076 Gm42833       |
| ENSMUSG00000047898 | 20077 Ccr4          |
| ENSMUSG00000023906 | 20078 Cldn6         |
| ENSMUSG00000108311 | 20079 RP23-32A8.8   |
| ENSMUSG00000034427 | 20080 Myo15b        |
| ENSMUSG00000082905 | 20081 Gm7823        |
| ENSMUSG00000061718 | 20082 Ppp1r1b       |
| ENSMUSG00000038745 | 20083 Nlrp6         |
| ENSMUSG00000032174 | 20084 Icam5         |
| ENSMUSG00000023781 | 20085 Hes7          |
| ENSMUSG00000105912 | 20086 Gm10440       |
| ENSMUSG00000038751 | 20087 Ptk6          |
| ENSMUSG00000056854 | 20088 Pou3f4        |
| ENSMUSG00000097416 | 20089 Gm26670       |
| ENSMUSG00000098064 | 20090 Gm9192        |
| ENSMUSG00000027584 | 20091 Oprl1         |
| ENSMUSG00000028542 | 20092 Slc6a9        |
| ENSMUSG00000045733 | 20093 Sprn          |
| ENSMUSG00000104489 | 20094 Gm9700        |
| ENSMUSG00000033595 | 20095 Lgi3          |
| ENSMUSG00000101901 | 20096 Gm9230        |
| ENSMUSG00000042988 | 20097 Notum         |
| ENSMUSG00000085766 | 20098 2810430I11Rik |
| ENSMUSG00000097564 | 20099 C430014B12Rik |
| ENSMUSG00000009075 | 20100 Cabp7         |
| ENSMUSG00000101220 | 20101 Gm6717        |
| ENSMUSG00000028475 | 20102 5430416O09Rik |
| ENSMUSG00000043986 | 20103 Spata31d1d    |
| ENSMUSG00000095367 | 20104 Gm20784       |
| ENSMUSG00000074469 | 20105 Gm15348       |
| ENSMUSG00000108337 | 20106 RP23-32A8.12  |
| ENSMUSG00000085073 | 20107 Gm14562       |
| ENSMUSG00000101306 | 20108 Gm5252        |
| ENSMUSG00000084394 | 20109 Gm8111        |
| ENSMUSG00000096546 | 20110 Smlr1         |
| ENSMUSG00000106295 | 20111 Gm42932       |
| ENSMUSG00000101826 | 20112 Gm8581        |
| ENSMUSG00000073422 | 20113 H2-Ke6        |
| ENSMUSG00000082894 | 20114 Gm6480        |
| ENSMUSG00000099454 | 20115 Gm8367        |
| ENSMUSG00000081591 | 20116 Gm13440       |

|                     |                     |
|---------------------|---------------------|
| ENSMUSG00000085837  | 20117 Kcnmb4os2     |
| ENSMUSG00000094439  | 20118 Gm21969       |
| ENSMUSG00000029671  | 20119 Wnt16         |
| ENSMUSG00000096010  | 20120 Hist4h4       |
| ENSMUSG00000097185  | 20121 Gm26596       |
| ENSMUSG00000027670  | 20122 Ocstamp       |
| ENSMUSG000000107928 | 20123 RP23-4F16.12  |
| ENSMUSG000000108616 | 20124 RP23-207N5.2  |
| ENSMUSG00000083275  | 20125 Gm4993        |
| ENSMUSG00000057615  | 20126 Ldoc1         |
| ENSMUSG00000026227  | 20127 2810459M11Rik |
| ENSMUSG00000030507  | 20128 Dbx1          |
| ENSMUSG00000090100  | 20129 Ttbk2         |
| ENSMUSG00000097592  | 20130 4930500F10Rik |
| ENSMUSG00000028357  | 20131 Kif12         |
| ENSMUSG00000097083  | 20132 D930019O06Rik |
| ENSMUSG00000068606  | 20133 Gm4841        |
| ENSMUSG00000074824  | 20134 Rslcan18      |
| ENSMUSG000000100434 | 20135 Gm3489        |
| ENSMUSG00000087364  | 20136 Gm13398       |
| ENSMUSG00000047197  | 20137 Gjd3          |
| ENSMUSG00000049709  | 20138 Nlrp10        |
| ENSMUSG00000084150  | 20139 Gm14395       |
| ENSMUSG00000097811  | 20140 2810425M01Rik |
| ENSMUSG00000080764  | 20141 Gm14606       |
| ENSMUSG00000031654  | 20142 Cbln1         |
| ENSMUSG000000101963 | 20143 1700001J11Rik |
| ENSMUSG00000029510  | 20144 Gpc2          |
| ENSMUSG00000029019  | 20145 Nppb          |
| ENSMUSG00000086810  | 20146 Gm13110       |
| ENSMUSG00000032578  | 20147 Cish          |
| ENSMUSG00000070999  | 20148 Ccin          |
| ENSMUSG00000037771  | 20149 Slc32a1       |
| ENSMUSG00000098001  | 20150 Gm27048       |
| ENSMUSG00000082840  | 20151 Gm16421       |
| ENSMUSG000000107428 | 20152 RP24-171J16.3 |
| ENSMUSG00000026237  | 20153 Nmur1         |
| ENSMUSG00000095869  | 20154 Ppp1r2-ps6    |
| ENSMUSG00000044361  | 20155 BC024139      |
| ENSMUSG00000047671  | 20156 Tctex1d4      |
| ENSMUSG00000097288  | 20157 Gm2155        |
| ENSMUSG00000086261  | 20158 Gm3765        |



|                    |                     |
|--------------------|---------------------|
| ENSMUSG00000053208 | 20159 Kat2b-ps      |
| ENSMUSG00000070661 | 20160 Rnf186        |
| ENSMUSG00000021647 | 20161 Cartpt        |
| ENSMUSG00000040935 | 20162 Padi6         |
| ENSMUSG00000095724 | 20163 Gm21319       |
| ENSMUSG00000055865 | 20164 Fam19a3       |
| ENSMUSG00000097463 | 20165 4930448E22Rik |
| ENSMUSG00000104676 | 20166 Gm42777       |
| ENSMUSG00000107005 | 20167 Gm42631       |
| ENSMUSG00000072432 | 20168 Gm10358       |
| ENSMUSG00000083560 | 20169 Gm14939       |
| ENSMUSG00000108391 | 20170 RP23-445E20.7 |
| ENSMUSG00000047384 | 20171 A730013G03Rik |
| ENSMUSG00000091017 | 20172 Fam71a        |
| ENSMUSG00000092560 | 20173 Gm8750        |
| ENSMUSG00000062961 | 20174 Ccdc177       |
| ENSMUSG00000083948 | 20175 Gm7158        |
| ENSMUSG00000102215 | 20176 Gm2464        |
| ENSMUSG00000069307 | 20177 Hist1h2bq     |
| ENSMUSG00000043794 | 20178 D830025C05Rik |
| ENSMUSG00000045871 | 20179 Slitrk6       |
| ENSMUSG00000108222 | 20180 RP23-170M6.2  |
| ENSMUSG00000045503 | 20181 Sys1          |
| ENSMUSG00000067235 | 20182 H2-Q10        |
| ENSMUSG00000070980 | 20183 Actl7b        |
| ENSMUSG00000083032 | 20184 Gm8087        |
| ENSMUSG00000082112 | 20185 Gm14445       |
| ENSMUSG00000081762 | 20186 Gm13738       |
| ENSMUSG00000097509 | 20187 B230322F03Rik |
| ENSMUSG00000107577 | 20188 RP23-374K9.7  |
| ENSMUSG00000080726 | 20189 Gm15366       |
| ENSMUSG00000053211 | 20190 Zfy1          |
| ENSMUSG00000074735 | 20191 Gm21994       |
| ENSMUSG00000007944 | 20192 Ttc9b         |
| ENSMUSG00000097759 | 20193 Gm26753       |
| ENSMUSG00000090965 | 20194 Gm17203       |
| ENSMUSG00000086805 | 20195 4932443L11Rik |
| ENSMUSG00000103688 | 20196 Gm6321        |
| ENSMUSG00000073486 | 20197 Gm10518       |
| ENSMUSG00000095663 | 20198 Gm2310        |
| ENSMUSG00000100075 | 20199 1700018L02Rik |
| ENSMUSG00000085748 | 20200 Gm12280       |

|                    |                     |
|--------------------|---------------------|
| ENSMUSG00000087660 | 20201 B230398E01Rik |
| ENSMUSG00000007216 | 20202 Zfp775        |
| ENSMUSG00000046173 | 20203 Pabpc6        |
| ENSMUSG00000066170 | 20204 E230001N04Rik |
| ENSMUSG00000058818 | 20205 Pirb          |
| ENSMUSG00000103295 | 20206 Scp2-ps1      |
| ENSMUSG00000104651 | 20207 Gm21168       |
| ENSMUSG00000082377 | 20208 Gm14415       |
| ENSMUSG00000048826 | 20209 Dact2         |
| ENSMUSG00000085841 | 20210 Gm4954        |
| ENSMUSG00000104479 | 20211 Gm10305       |
| ENSMUSG00000106590 | 20212 Gm42879       |
| ENSMUSG00000098007 | 20213 Gm8614        |
| ENSMUSG00000107300 | 20214 Gm43279       |
| ENSMUSG00000097100 | 20215 9230104M06Rik |
| ENSMUSG00000070908 | 20216 Gm13288       |
| ENSMUSG00000051209 | 20217 Gpr119        |
| ENSMUSG00000046000 | 20218 Naa11         |
| ENSMUSG00000097487 | 20219 Ptges3l       |
| ENSMUSG00000040724 | 20220 Kcna2         |
| ENSMUSG00000105447 | 20221 Gm43653       |
| ENSMUSG00000083151 | 20222 Gm4913        |
| ENSMUSG00000032977 | 20223 Fam207a       |
| ENSMUSG00000105482 | 20224 Gm42596       |
| ENSMUSG00000100554 | 20225 Gm7690        |
| ENSMUSG00000101615 | 20226 Gm8495        |
| ENSMUSG00000102432 | 20227 Gm29856       |
| ENSMUSG00000066058 | 20228 Cldn19        |
| ENSMUSG00000097154 | 20229 Gm26510       |
| ENSMUSG00000056648 | 20230 Hoxb8         |
| ENSMUSG00000001103 | 20231 Sebox         |
| ENSMUSG00000040680 | 20232 Kremen2       |
| ENSMUSG00000084370 | 20233 Gm15442       |
| ENSMUSG00000040432 | 20234 Ltb4r2        |
| ENSMUSG00000102775 | 20235 Gm38160       |
| ENSMUSG00000086377 | 20236 4930529C04Rik |
| ENSMUSG00000068122 | 20237 Agtr2         |
| ENSMUSG00000102501 | 20238 Gm37372       |
| ENSMUSG00000081831 | 20239 Gm7405        |
| ENSMUSG00000074121 | 20240 Ntf5          |
| ENSMUSG00000026198 | 20241 Abcb6         |
| ENSMUSG00000093895 | 20242 Gm21865       |

|                    |                     |
|--------------------|---------------------|
| ENSMUSG00000057321 | 20243 Usp17ld       |
| ENSMUSG00000082473 | 20244 Kif22-ps      |
| ENSMUSG00000048502 | 20245 Duxbl1        |
| ENSMUSG00000004894 | 20246 Hapln2        |
| ENSMUSG00000060530 | 20247 A930017M01Rik |
| ENSMUSG00000086815 | 20248 3110082J24Rik |
| ENSMUSG00000072624 | 20249 Gm5460        |
| ENSMUSG00000091022 | 20250 Gm3115        |
| ENSMUSG00000097984 | 20251 Gm8167        |
| ENSMUSG00000048217 | 20252 Nags          |
| ENSMUSG00000104159 | 20253 Gm38099       |
| ENSMUSG00000083127 | 20254 Gm15189       |
| ENSMUSG00000061517 | 20255 Sox21         |
| ENSMUSG00000101371 | 20256 Gm9114        |
| ENSMUSG00000081574 | 20257 Gm14429       |
| ENSMUSG00000097481 | 20258 D330020A13Rik |
| ENSMUSG00000084310 | 20259 Gm11950       |
| ENSMUSG00000096964 | 20260 Gm6345        |
| ENSMUSG00000106334 | 20261 Gm43549       |
| ENSMUSG00000054404 | 20262 Slfn5         |
| ENSMUSG00000106304 | 20263 Gm42518       |
| ENSMUSG00000090231 | 20264 Cfb           |
| ENSMUSG00000035187 | 20265 Nkx6-1        |
| ENSMUSG00000100843 | 20266 Gm8307        |
| ENSMUSG00000068154 | 20267 Insm1         |
| ENSMUSG00000006216 | 20268 Clcnkb        |
| ENSMUSG00000084120 | 20269 Gm11624       |
| ENSMUSG00000068696 | 20270 Gpr88         |
| ENSMUSG00000102999 | 20271 Gm37762       |
| ENSMUSG00000034486 | 20272 Gbx2          |
| ENSMUSG00000097974 | 20273 Gm10605       |
| ENSMUSG00000087052 | 20274 Gm8093        |
| ENSMUSG00000097567 | 20275 Gm26637       |
| ENSMUSG00000056895 | 20276 Hist3h2ba     |
| ENSMUSG00000083250 | 20277 Gm5403        |
| ENSMUSG00000097991 | 20278 Gm7656        |
| ENSMUSG00000085992 | 20279 Gm11515       |
| ENSMUSG00000068259 | 20280 Olfr461       |
| ENSMUSG00000099542 | 20281 Gm28504       |
| ENSMUSG00000106192 | 20282 Amd-ps2       |
| ENSMUSG00000102389 | 20283 D630023O14Rik |
| ENSMUSG00000097372 | 20284 Gm26876       |

|                    |                     |
|--------------------|---------------------|
| ENSMUSG00000097767 | 20285 Miat          |
| ENSMUSG00000073405 | 20286 C920025E04Rik |
| ENSMUSG00000105390 | 20287 Gm8458        |
| ENSMUSG00000054758 | 20288 Gm9956        |
| ENSMUSG00000071332 | 20289 E230015B07Rik |
| ENSMUSG00000108599 | 20290 RP24-186G5.4  |
| ENSMUSG00000092627 | 20291 D130058E05Rik |
| ENSMUSG00000048544 | 20292 5930422O12Rik |
| ENSMUSG00000030402 | 20293 Ppm1n         |
| ENSMUSG00000097668 | 20294 Gm26761       |
| ENSMUSG00000101417 | 20295 Gm21647       |
| ENSMUSG00000100220 | 20296 Gm29331       |
| ENSMUSG00000060257 | 20297 Scrt2         |
| ENSMUSG00000035370 | 20298 Adat3         |
| ENSMUSG00000103716 | 20299 Gm19430       |
| ENSMUSG00000027297 | 20300 Ltk           |
| ENSMUSG00000020279 | 20301 Il9r          |
| ENSMUSG00000106918 | 20302 Mrpl33        |
| ENSMUSG00000079104 | 20303 Prps1l3       |
| ENSMUSG00000093859 | 20304 Gm7882        |
| ENSMUSG00000049926 | 20305 Olfr921       |
| ENSMUSG00000093543 | 20306 Gm8473        |
| ENSMUSG00000097094 | 20307 Gm26548       |
| ENSMUSG00000086083 | 20308 Gm15829       |
| ENSMUSG00000081939 | 20309 Gm15399       |
| ENSMUSG00000041703 | 20310 Zic5          |
| ENSMUSG00000107832 | 20311 RP23-42J4.2   |
| ENSMUSG00000061524 | 20312 Zic2          |
| ENSMUSG00000098055 | 20313 Gm26947       |
| ENSMUSG00000097369 | 20314 Gm26545       |
| ENSMUSG00000058620 | 20315 Adra2b        |
| ENSMUSG00000097371 | 20316 Gm26875       |
| ENSMUSG00000101333 | 20317 Gm4753        |
| ENSMUSG00000051732 | 20318 Pabpc2        |
| ENSMUSG00000103625 | 20319 Gm37357       |
| ENSMUSG00000084202 | 20320 Gm5398        |
| ENSMUSG00000080765 | 20321 Gm8908        |
| ENSMUSG00000087639 | 20322 Gm15512       |
| ENSMUSG00000043468 | 20323 Adam30        |
| ENSMUSG00000050473 | 20324 Slc35d3       |
| ENSMUSG00000101807 | 20325 Gm9120        |
| ENSMUSG00000036813 | 20326 Entpd8        |

|                    |                     |
|--------------------|---------------------|
| ENSMUSG00000005982 | 20327 Naa60         |
| ENSMUSG00000093908 | 20328 Gm5784        |
| ENSMUSG00000020125 | 20329 Elane         |
| ENSMUSG00000097870 | 20330 Gm26868       |
| ENSMUSG00000044352 | 20331 Sowaha        |
| ENSMUSG00000097280 | 20332 Al849053      |
| ENSMUSG00000107254 | 20333 Gm43769       |
| ENSMUSG00000082567 | 20334 Gm14896       |
| ENSMUSG00000074355 | 20335 Gm10676       |
| ENSMUSG00000072423 | 20336 Psmb11        |
| ENSMUSG00000084350 | 20337 Znf41-ps      |
| ENSMUSG00000036790 | 20338 Slitrk2       |
| ENSMUSG00000098022 | 20339 Zfp82         |
| ENSMUSG00000101396 | 20340 Gm28510       |
| ENSMUSG00000085069 | 20341 Gm13111       |
| ENSMUSG00000087535 | 20342 Zmiz1os1      |
| ENSMUSG00000079555 | 20343 Haus3         |
| ENSMUSG00000044349 | 20344 Snhg11        |
| ENSMUSG00000028287 | 20345 1700009N14Rik |
| ENSMUSG00000050368 | 20346 Hoxd10        |
| ENSMUSG00000045912 | 20347 C2cd4c        |
| ENSMUSG00000031907 | 20348 Zfp90         |
| ENSMUSG00000031489 | 20349 Adrb3         |
| ENSMUSG00000085584 | 20350 Rgag1         |
| ENSMUSG00000102633 | 20351 Gm38224       |
| ENSMUSG00000030411 | 20352 Nova2         |
| ENSMUSG00000086844 | 20353 B230206H07Rik |
| ENSMUSG00000094627 | 20354 Gm10182       |
| ENSMUSG00000098987 | 20355 Gm8982        |
| ENSMUSG00000083721 | 20356 Gm7700        |
| ENSMUSG00000105486 | 20357 Gm3372        |
| ENSMUSG00000105676 | 20358 Gm43403       |
| ENSMUSG00000059213 | 20359 Ddn           |
| ENSMUSG00000098060 | 20360 Gm4842        |
| ENSMUSG00000031302 | 20361 Nlgn3         |
| ENSMUSG00000082046 | 20362 Gm14464       |
| ENSMUSG00000107434 | 20363 RP23-408l12.1 |
| ENSMUSG00000099425 | 20364 Gm29573       |
| ENSMUSG00000081599 | 20365 Gm14390       |
| ENSMUSG00000031293 | 20366 Rs1           |
| ENSMUSG00000093656 | 20367 Gm20628       |
| ENSMUSG00000098950 | 20368 Gm28036       |

|                    |                     |
|--------------------|---------------------|
| ENSMUSG00000097455 | 20369 Gm26891       |
| ENSMUSG00000079534 | 20370 Gm5640        |
| ENSMUSG00000067399 | 20371 Trim43c       |
| ENSMUSG00000020607 | 20372 Fam84a        |
| ENSMUSG00000101966 | 20373 Gm5248        |
| ENSMUSG00000000103 | 20374 Zfy2          |
| ENSMUSG00000097333 | 20375 Zfp87         |
| ENSMUSG00000020887 | 20376 A230052G05Rik |
| ENSMUSG00000089630 | 20377 Gm6903        |
| ENSMUSG00000094844 | 20378 Gm20796       |
| ENSMUSG00000036733 | 20379 Rbm42         |
| ENSMUSG00000064032 | 20380 Gm10143       |
| ENSMUSG00000073529 | 20381 F830208F22Rik |
| ENSMUSG00000022066 | 20382 Gm21685       |
| ENSMUSG00000022997 | 20383 Wnt1          |
| ENSMUSG00000092238 | 20384 Gm6004        |
| ENSMUSG00000097004 | 20385 4731419I09Rik |
| ENSMUSG00000050761 | 20386 Gp1bb         |
| ENSMUSG00000097411 | 20387 B430218F22Rik |
| ENSMUSG00000103119 | 20388 Gm37583       |
| ENSMUSG00000004661 | 20389 Arid3b        |
| ENSMUSG00000098292 | 20390 Gm27194       |
| ENSMUSG00000086796 | 20391 4932702P03Rik |
| ENSMUSG00000092528 | 20392 Nlrp1c-ps     |
| ENSMUSG00000100980 | 20393 Gm29100       |
| ENSMUSG00000037225 | 20394 Fgf2          |
| ENSMUSG00000094566 | 20395 Gm12620       |
| ENSMUSG00000095595 | 20396 Fam177a       |
| ENSMUSG00000026097 | 20397 Ormdl1        |
| ENSMUSG00000069303 | 20398 Hist1h2br     |
| ENSMUSG00000095139 | 20399 Pou3f2        |
| ENSMUSG00000070717 | 20400 Gm10300       |
| ENSMUSG00000091418 | 20401 Gm3164        |
| ENSMUSG00000050982 | 20402 Apol10a       |
| ENSMUSG00000098188 | 20403 Sowahc        |
| ENSMUSG00000081486 | 20404 Gm14452       |
| ENSMUSG00000036422 | 20405 Pcdh8         |
| ENSMUSG00000104876 | 20406 Trdc          |
| ENSMUSG00000028102 | 20407 Pex11b        |
| ENSMUSG00000070844 | 20408 Vmn2r42       |
