# Supplementary material
Source: PubMed Central journal article supplement (PMC6180209)
Supplement: NIHMS905624-supplement-5.pdf [file NIHMS905624-supplement-5.pdf]

**Supplemental Table 1 Sequences of primers used for qRT-PCR.**

Primers for each gene analyzed by quantitative RT-PCR species are listed as forward and reverse.

**Supplemental Tables 2 and 3 Rank Lists of genes**

Ensembl gene symbols and corresponding gene ranks based on RNA-Seq expression levels in mouse and lizard satellite cells.

**Supplemental Figure 1. Average XGSA rank for all tissues from the mouse and human ENCODE projects compared to lizard satellite cells across a large range of parameters.**

Over a large range of parameters (number of top highly expressed genes: 500, 1,000, 1,500, 2,000; % of cells containing marker gene: 1%, 2%, 3%, 5%, 10%, 15%, and 20%), XGSA comparison against 94 mouse and 139 human tissues reveals that the lizard satellite cell transcriptome (Hutchins et al., 2014) consistently displayed highest similarity with mouse and human satellite cells.
